# Supplementary material
Source: HighWire-hosted journal article supplement (doi:10.1101/rna.078535.120)
Supplement: Supplemental_Information.docx [file Supplemental_Information.docx]

**SUPPLEMENTARY INFORMATION**

Suplemental_Text_S1.pdf - **Supplementary Text S1**. A generalized description of arbitrary RNA secondary structure. List of definitions.

FileS1.jmol - **Supplementary File S1**. A saved state for the Jmol visualization software (<http://jmol.sourceforge.net/>) with a structural alignment of eight representative across-bulged motifs from Table 2. The structures have been superposed using the SETTER web-server (<http://setter.projekty.ms.mff.cuni.cz/>). The adenines that form A-minors are shown in blue, the base triple is shown in yellow, the bulged bases are shown in purple.

FigureS1.jpg - **Supplementary Figure S1**. A structural alignment of eight representative across-bulged motifs from Table 2. The structures have been superposed using the SETTER web-server (<http://setter.projekty.ms.mff.cuni.cz/>). The adenines that form A-minors are shown in blue, the base triple is shown in yellow, the bulged bases are shown in purple.

Supplemental_Table_S1.pdf - **Supplementary Table S1**. List of across-bulged motifs found in the representative set of PDB structures.

Supplemental_Table_S2.xlsx - **Supplementary Table S2**. Lists of 2431 A-minor interactions annotated in this study, 194 A-minor interactions of type I annotated in work (Reinharz et al. 2018), and 103 A-minor interactions of type I from the intersection of the two datasets.

Supplemental_Table_S3.xlsx - **Supplementary Table S3**. List of the edges forming 626 A-minor clusters.

Supplemental_Table_S4.xlsx - **Supplementary Table S4**. Nonredundant set of 44 RNA chains.

Supplemental_Table_S5.xlsx - **Supplementary Table S5**. Features of (stem, A-stretch) pairs. List of descriptions
