# Supplementary material
Source: HighWire-hosted journal article supplement (doi:10.1101/rna.078535.120)
Supplement: Supplemental_Table_S2.xlsx [file Supplemental_Table_S2.xlsx]

## Sheet: ReadMe
Description of columns from the “AminorsNR_3.0” sheet [2431 A-minor interactions]
Column	Description
PDB	Filename containing the PDB entry identifier
Relation	intra = intramolecular interaction; Inter = intermolecular interaction
Cluster	Number of the corresponding A-minor cluster (0 for single A-minor interactions)
Motif	Number of the corresponding A-minor motif
DSSR_A	The “A” nucleotide description in DSSR format (chain.base.number_in_chain)
DSSR_L	The “L” nucleotide description in DSSR format (chain.base.number_in_chain)
DSSR_R	The “R” nucleotide description in DSSR format (chain.base.number_in_chain)
BP_Type	The base pair type in 2-letter format according to the DSSR program (WC – Watson-Crick, WB – Wobble, etc.)
SaengerBP	The base pair type according to the Saenger classification
LWBP	The base pair type according to the Leontis-Westhof classification
LuBP	The base pair type according to the DSSR classification
Type	Geometric type of the A-minor (I, II, or X)
Class	Bases content of the A-minor
SSA	Secondary structure element of the “A” nucleotide
SSL	Secondary structure element of the “L” nucleotide
SSR	Secondary structure element of the “R” nucleotide
AL	Relative relation between “A” and “L” nucleotides (SM for the same element; LC for adjacent elements; LR for distant elements)
AR	Relative relation between “A” and “R” nucleotides (SM for the same element; LC for adjacent elements; LR for distant elements)
LR	Relative relation between “L” and “R” nucleotides (SM for the same element; LC for adjacent elements; LR for distant elements)
ASEQ	Sequence from -3 to +3 position relative to the “A” nucleotide
LSEQ	Sequence from -3 to +3 position relative to the “L” nucleotide
RSEQ	Sequence from -3 to +3 position relative to the “R” nucleotide
Signature	Signature of the pseudoknot involving the stem of the base pair (if any)
Scheme	Scheme of the pseudoknot involving the stem of the base pair (if any)
StemInScheme	Relative number of the stem within the pseudoknot scheme (if any)
MolA	Molecule description of the RNA chain involving the “A” nucleotide
MolL	Molecule description of the RNA chain involving the “L” nucleotide
MolR	Molecule description of the RNA chain involving the “R” nucleotide
OrgA	Organism source of the RNA chain involving the “A” nucleotide
OrgL	Organism source of the RNA chain involving the “L” nucleotide
OrgR	Organism source of the RNA chain involving the “R” nucleotide
BondsAL	Hydrogen bonds between the “A” and the “L” nucleotides
BondsAR	Hydrogen bonds between the “A” and the “R” nucleotides
MOTIFSIZE	Size of the corresponding A-minor motif (#Adenines, #Base pairs)
FRAGMENTS	Number of threads and wings involved in the corresponding A-minor motif
AFLEN	Length of the thread involving the “A” nucleotide
LFLEN	Length of the wing or the thread involving the “L” nucleotide
RFLEN	Length of the wing or the thread involving the “R” nucleotide
GNRA	ASEQ column contains GNRA sequence (1 – yes, 0 – no)
ANYA	ASEQ column contains ANYA sequence (1 – yes, 0 – no)
UNAC	ASEQ column contains UNAC sequence (1 – yes, 0 – no)
UNCG	ASEQ column contains UNCG sequence (1 – yes, 0 – no)
TETRALOOP	ASEQ column contains any known tetraloop sequence (1 if there is 1 in at least one column among columns GNRA, ANYA, UNAC & UNCG , 0 otherwise)
LWAL	Leontis-Westhof type of a base-pair formed by A and L bases (Leontis and Westhof 2001)
LWAR	Leontis-Westhof type of a base-pair formed by A and R bases (Leontis and Westhof 2001)
CaRNAvalSSE1	Secondary structure element of the A nucleotide according to the annotation from (Reinharz et al. 2018)
CaRNAvalSSE2	Secondary structure element of the L and R nucleotides according to the annotation from (Reinharz et al. 2018)
“CaRNAval” sheet - 194 A-minor interactions of type I from the CaRNAval database (Reinharz et al. 2018)
“Intersection” sheet - 103 A-minor interactions of type I that are present in both datasets	Description

## Sheet: AminorsNR_3.0
PDB	Relation	Cluster	Motif	DSSR_A	DSSR_L	DSSR_R	BP_Type	SaengerBP	LWBP	LuBP	Type	Class	SSA	SSL	SSR	AL	AR	LR	ASEQ	LSEQ	RSEQ	Signature	Scheme	StemInScheme	MolA	MolL	MolR	OrgA	OrgL	OrgR	BondsAL	BondsAR	MOTIFSIZE	FRAGMENTS	AFLEN	LFLEN	RFLEN	GNRA	ANYA	UNAC	UNCG	TETRALOOP	LWAL	LWAR	CaRNAvalSSE1	CaRNAvalSSE2
1et4.cif1	intra	0	1	A.A.217.	A.U.215.	A.C.229.	NA	n/a	cWW	cW-W	X	A|U-C	HP	HP	HP	SM	SM	SM	AUAACCA	GCAUAAC	GUGCGAG				RNA APTAMER, 35-MER	RNA APTAMER, 35-MER	RNA APTAMER, 35-MER	unspecified	unspecified	unspecified		N6(amino)-O2(carbonyl)[2.60]	(1,1)	2	6	6	9	0	1	1	0	1		cWW
1et4.cif1	intra	0	2	A.A.225.	A.G.208.	A.C.221.	WC	19-XIX	cWW	cW-W	I	A|G-C	HP	S	S	LC	LC	SM	CUCAGUG	CCGGUGC	CCACCUC	abAB	1,2,-1,-2	1	RNA APTAMER, 35-MER	RNA APTAMER, 35-MER	RNA APTAMER, 35-MER	unspecified	unspecified	unspecified	N1-O2'(hydroxyl)[2.60]_N3-N2(amino)[3.20]	O2'(hydroxyl)-O2'(hydroxyl)[2.64]_O2'(hydroxyl)-O2(carbonyl)[3.12]	(1,1)	3	9	3	3	0	0	0	0	0	t.S
1f1t.cif1	intra	1	3	A.A.26.	A.5BU.11.	A.A.22.	WC	20-XX	cWW	cW-W	X	A|u-A	IC	S	S	LC	LC	SM	GGMAACG	GACMGGC	GCCAGGM				MALACHITE GREEN APTAMER RNA	MALACHITE GREEN APTAMER RNA	MALACHITE GREEN APTAMER RNA	unspecified	unspecified	unspecified	N6(amino)-O2(carbonyl)[2.95]_N1-O2'(hydroxyl)[2.73]		(2,2)	3	4	5	5	0	0	0	0	0	cWS
1f1t.cif1	intra	1	3	A.A.27.	A.C.10.	A.G.23.	WC	19-XIX	cWW	cW-W	X	A|C-G	IC	S	S	LC	LC	SM	GMAACGA	CGACMGG	CCAGGMA				MALACHITE GREEN APTAMER RNA	MALACHITE GREEN APTAMER RNA	MALACHITE GREEN APTAMER RNA	unspecified	unspecified	unspecified		N6(amino)-N3[2.83]_N1-N2(amino)[2.77]	(2,2)	3	4	5	5	0	0	0	0	0		tWS
1f1t.cif1	intra	0	4	A.A.31.	A.C.7.	A.G.29.	WC	19-XIX	cWW	cW-W	X	A|C-G	BC	S	S	LC	LC	SM	CGAAMGG	MCCCGAC	AACGAAM				MALACHITE GREEN APTAMER RNA	MALACHITE GREEN APTAMER RNA	MALACHITE GREEN APTAMER RNA	unspecified	unspecified	unspecified		N6(amino)-N3[3.14]_N1-N2(amino)[2.69]	(1,1)	3	3	2	2	0	0	0	0	0		tWS
1f27.cif1	inter	0	5	B.A.23.	A.C.4.	A.G.19.	WC	19-XIX	cWW	cW-W	I	A|C-G	HP	S	S	LC	LC	SM	NNAAAAA	NNACCGU	ACGGUUN	abAB	1,2,-1,-2	1	RNA (5'-R(*AP*AP*AP*AP*AP*GP*UP*CP*CP*UP*C)-3')	RNA (5'-R(*AP*CP*CP*GP*UP*CP*AP*GP*AP*GP*GP*AP*CP*AP*CP*GP*GP*UP*U)-3')	RNA (5'-R(*AP*CP*CP*GP*UP*CP*AP*GP*AP*GP*GP*AP*CP*AP*CP*GP*GP*UP*U)-3')	unspecified	unspecified	unspecified	N1-O2'(hydroxyl)[2.71]	O2'(hydroxyl)-O2'(hydroxyl)[2.67]_O2'(hydroxyl)-N3[2.74]_N3-N2(amino)[2.99]	(1,1)	3	5	5	5	0	0	0	0	0		cSS
1f27.cif1	inter	0	6	B.A.26.	A.G.6.	A.C.17.	WC	19-XIX	cWW	cW-W	X	A|G-C	HP	S	S	LC	LC	SM	AAAAGUC	ACCGUCA	ACACGGU	abAB	1,2,-1,-2	1	RNA (5'-R(*AP*AP*AP*AP*AP*GP*UP*CP*CP*UP*C)-3')	RNA (5'-R(*AP*CP*CP*GP*UP*CP*AP*GP*AP*GP*GP*AP*CP*AP*CP*GP*GP*UP*U)-3')	RNA (5'-R(*AP*CP*CP*GP*UP*CP*AP*GP*AP*GP*GP*AP*CP*AP*CP*GP*GP*UP*U)-3')	unspecified	unspecified	unspecified		N6(amino)-O2(carbonyl)[3.07]_N1-O2'(hydroxyl)[2.69]	(1,1)	3	5	5	5	0	0	0	0	0		cWS
1hc8.cif1	intra	2	7	C.A.134.	C.A.104.	C.U.155.	WC	20-XX	cWW	cW-W	II	A|A-U	JC	S	S	LC	LC	SM	UUUAAAG	MCCAGGA	CACUGGU				58 NUCLEOTIDE RIBOSOMAL 23S RNA DOMAIN	58 NUCLEOTIDE RIBOSOMAL 23S RNA DOMAIN	58 NUCLEOTIDE RIBOSOMAL 23S RNA DOMAIN	escherichia coli	escherichia coli	escherichia coli		O2'(hydroxyl)-O2'(hydroxyl)[2.90]_N3-O2'(hydroxyl)[2.54]	(2,2)	3	8	5	5	0	0	0	0	0		cWS
1hc8.cif1	intra	2	7	C.A.135.	C.G.105.	C.C.154.	WC	19-XIX	cWW	cW-W	I	A|G-C	JC	S	S	LC	LC	SM	UUAAAGA	CCAGGAU	UCACUGG				58 NUCLEOTIDE RIBOSOMAL 23S RNA DOMAIN	58 NUCLEOTIDE RIBOSOMAL 23S RNA DOMAIN	58 NUCLEOTIDE RIBOSOMAL 23S RNA DOMAIN	escherichia coli	escherichia coli	escherichia coli	N1-O2'(hydroxyl)[2.77]_N3-N2(amino)[2.90]	O3'-O2'(hydroxyl)[2.95]_O2'(hydroxyl)-O2'(hydroxyl)[2.58]_O2'(hydroxyl)-O2(carbonyl)[3.09]	(2,2)	3	8	5	5	0	0	0	0	0	tSS
1hmh.cif1	inter	3	8	A.A.23.L	C.C.104.	C.G.114.	WC	19-XIX	cWW	cW-W	II	A|C-G	HC	S	S	LR	LR	SM	CGAAAGG	GGCCGAA	AAAGGCC				HAMMERHEAD RIBOZYME-RNA STRAND	HAMMERHEAD RIBOZYME-RNA STRAND	HAMMERHEAD RIBOZYME-RNA STRAND	unspecified	unspecified	unspecified	O2'(hydroxyl)-O3'[3.10]_O2'(hydroxyl)-O2'(hydroxyl)[2.57]_N3-O2'(hydroxyl)[2.49]	N1-N2(amino)[3.57]	(2,2)	3	4	4	4	1	0	0	0	1	cSS	tW.
1hmh.cif1	inter	3	8	A.A.24.L	C.C.103.	C.G.113.	WC	19-XIX	cWW	cW-W	I	A|C-G	HC	S	S	LR	LR	SM	GAAAGGC	AGGCCGA	AAGGCCG				HAMMERHEAD RIBOZYME-RNA STRAND	HAMMERHEAD RIBOZYME-RNA STRAND	HAMMERHEAD RIBOZYME-RNA STRAND	unspecified	unspecified	unspecified	O2'(hydroxyl)-O2'(hydroxyl)[2.70]_O2'(hydroxyl)-O2(carbonyl)[3.01]	N1-O2'(hydroxyl)[3.26]_N3-N2(amino)[2.89]	(2,2)	3	4	4	4	1	0	0	0	1		tSS
1hmh.cif1	inter	0	9	E.A.90.	A.G.101.	A.C.111.	WC	19-XIX	cWW	cW-W	X	A|G-C	JC	S	S	LR	LR	SM	AUGAGGC	UGAGGCC	GGCCGAA				HAMMERHEAD RIBOZYME-RNA STRAND	HAMMERHEAD RIBOZYME-RNA STRAND	HAMMERHEAD RIBOZYME-RNA STRAND	unspecified	unspecified	unspecified		N3-O2'(hydroxyl)[2.93]	(1,1)	3	7	4	4	0	0	0	0	0
1i6u.cif1	intra	0	10	C.A.26.	C.U.13.	C.A.24.	WC	20-XX	cWW	cW-W	X	A|U-A	BC	S	S	LC	LC	SM	GAUACUG	AAGUCUC	GAGAUAC				16S RRNA FRAGMENT	16S RRNA FRAGMENT	16S RRNA FRAGMENT	unspecified	unspecified	unspecified	N6(amino)-O2(carbonyl)[2.90]		(1,1)	3	2	4	4	0	0	0	0	0	cW.
1jzv.cif1	inter	0	11	B.A.13.	C.C.26.	D.G.31.	WC	19-XIX	cWW	cW-W	I	A|C-G	BC	S	S	LR	LR	SM	AGUACGM	CGACMGN	NCAGUAC				5'-R(*CP*AP*GP*UP*AP*CP*GP*(5IC)P*C)-3'	5'-R(*GP*GP*CP*GP*AP*CP*(5BU)P*G)-3'	5'-R(*CP*AP*GP*UP*AP*CP*GP*(5IC)P*C)-3'	unspecified	unspecified	unspecified	O3'-O2'(hydroxyl)[3.06]_O2'(hydroxyl)-O2'(hydroxyl)[2.48]_O2'(hydroxyl)-O2(carbonyl)[3.22]	N1-O2'(hydroxyl)[2.63]_N3-N2(amino)[3.20]	(1,1)	3	1	4	4	0	1	0	1	1		tSS
1jzv.cif1	inter	0	12	D.A.33.	A.C.6.	B.G.11.	WC	19-XIX	cWW	cW-W	I	A|C-G	BC	S	S	LR	LR	SM	AGUACGM	CGACMGN	NCAGUAC				5'-R(*CP*AP*GP*UP*AP*CP*GP*(5IC)P*C)-3'	5'-R(*GP*GP*CP*GP*AP*CP*(5BU)P*G)-3'	5'-R(*CP*AP*GP*UP*AP*CP*GP*(5IC)P*C)-3'	unspecified	unspecified	unspecified	O2'(hydroxyl)-O2'(hydroxyl)[2.64]_O2'(hydroxyl)-O2(carbonyl)[3.20]	N1-O2'(hydroxyl)[2.61]_N3-N2(amino)[3.07]	(1,1)	3	1	4	4	0	1	0	1	1		tSS
1kh6.cif1	intra	4	13	A.A.6.	A.A.24.	A.5BU.37.	WC	20-XX	cWW	cW-W	X	A|A-u	JC	S	S	LC	LC	SM	CGGAACC	CGGAAMC	GAMMMGG				JIIIabc	JIIIabc	JIIIabc	unspecified	unspecified	unspecified		N7-O2'(hydroxyl)[2.54]_N6(amino)-O2(carbonyl)[2.86]	(2,2)	3	2	5	5	1	0	0	0	1		cHS
1kh6.cif1	intra	4	13	A.A.6.	A.A.25.	A.5BU.36.	WC	20-XX	cWW	cW-W	X	A|A-u	JC	S	S	LC	LC	SM	CGGAACC	GGAAMCC	GGAMMMG				JIIIabc	JIIIabc	JIIIabc	unspecified	unspecified	unspecified	N6(amino)-N3[3.23]_N1-O2'(hydroxyl)[3.14]		(2,2)	3	2	5	5	1	0	0	0	1	cWS
1kh6.cif1	intra	4	13	A.A.7.	A.A.24.	A.5BU.37.	WC	20-XX	cWW	cW-W	X	A|A-u	JC	S	S	LC	LC	SM	GGAACCG	CGGAAMC	GAMMMGG				JIIIabc	JIIIabc	JIIIabc	unspecified	unspecified	unspecified	N6(amino)-N3[3.22]_N1-O2'(hydroxyl)[2.83]		(2,2)	3	2	5	5	1	0	0	0	1	cWS
1kuq.cif1	intra	0	14	B.A.17.	B.G.6.	B.C.15.	WC	19-XIX	cWW	cW-W	X	A|G-C	JC	S	S	LC	LC	SM	GCUAGAC	GCGGCCU	GGGCUAG				16S RIBOSOMAL RNA FRAGMENT	16S RIBOSOMAL RNA FRAGMENT	16S RIBOSOMAL RNA FRAGMENT	thermus thermophilus	thermus thermophilus	thermus thermophilus	N1-N2(amino)[2.82]		(1,1)	3	3	3	3	0	0	0	0	0	cWS
1kxk.cif1	intra	0	15	A.A.67.	A.C.6.	A.G.64.	WC	19-XIX	cWW	cW-W	X	A|C-G	HC	S	S	LC	LC	SM	GGAAAAC	CUACCUA	GGGGGAA				ai5g group II Self-splicing intron	ai5g group II Self-splicing intron	ai5g group II Self-splicing intron	unspecified	unspecified	unspecified	N1-O2'(hydroxyl)[2.90]	N3-N2(amino)[3.02]	(1,1)	3	6	3	3	1	0	0	0	1		cSW
1l2x.cif1	intra	0	16	A.A.20.	A.G.4.	A.C.17.	WC	19-XIX	cWW	cW-W	I	A|G-C	HP	S	S	LC	LC	SM	CGGAACA	MGCGCGG	CCGCGGA	abAB	1,2,-1,-2	1	RNA pseudoknot	RNA pseudoknot	RNA pseudoknot	unspecified	unspecified	unspecified	N1-O2'(hydroxyl)[2.69]_N3-N2(amino)[3.00]	O2'(hydroxyl)-O2'(hydroxyl)[2.69]_O2'(hydroxyl)-O2(carbonyl)[2.80]	(1,1)	3	7	5	5	1	1	0	0	1	tSS		Exterior Loop	Stem
1l2x.cif1	intra	5	17	A.A.23.	A.G.6.	A.C.15.	WC	19-XIX	cWW	cW-W	X	A|G-C	HP	S	S	LC	LC	SM	AACAAAC	CGCGGCA	GUCCGCG	abAB	1,2,-1,-2	1	RNA pseudoknot	RNA pseudoknot	RNA pseudoknot	unspecified	unspecified	unspecified	N6(amino)*N2(amino)[3.34]	N6(amino)-O2(carbonyl)[2.91]_N1-O2'(hydroxyl)[2.80]	(3,2)	3	7	5	5	0	1	0	0	1	cH.	cWS
1l2x.cif1	intra	5	17	A.A.24.	A.G.7.	A.C.14.	WC	19-XIX	cWW	cW-W	X	A|G-C	HP	S	S	LC	LC	SM	ACAAACG	GCGGCAC	CGUCCGC	abAB	1,2,-1,-2	1	RNA pseudoknot	RNA pseudoknot	RNA pseudoknot	unspecified	unspecified	unspecified	N6(amino)-O2'(hydroxyl)[3.04]_N6(amino)-N3[2.94]_N1-N2(amino)[3.00]		(3,2)	3	7	5	5	0	0	0	0	0	tWS
1l2x.cif1	intra	5	17	A.A.25.	A.G.7.	A.C.14.	WC	19-XIX	cWW	cW-W	X	A|G-C	HP	S	S	LC	LC	SM	CAAACGG	GCGGCAC	CGUCCGC	abAB	1,2,-1,-2	1	RNA pseudoknot	RNA pseudoknot	RNA pseudoknot	unspecified	unspecified	unspecified		N6(amino)-O2(carbonyl)[2.79]_N1-O2'(hydroxyl)[2.65]	(3,2)	3	7	5	5	0	0	0	0	0		cWS
1l9a.cif1	intra	0	18	B.A.133.	B.U.132.	B.G.164.	NA	n/a	cWW	cW-W	X	A|U-G	IC	S	IC	LC	SM	LC	AAUAUGG	CAAUAUG	CCAGGUU				signal recognition particle RNA S domain	signal recognition particle RNA S domain	signal recognition particle RNA S domain	unspecified	unspecified	unspecified		N7-N2(amino)[2.69]_N6(amino)-O2'(hydroxyl)[2.99]	(1,1)	3	1	4	1	0	1	0	0	1		tHS
1l9a.cif1	intra	0	19	B.A.149.	B.G.197.	B.C.202.	WC	19-XIX	cWW	cW-W	II	A|G-C	HC	S	S	LR	LR	SM	GGGAGCG	GUCGGAA	AAACGGA				signal recognition particle RNA S domain	signal recognition particle RNA S domain	signal recognition particle RNA S domain	unspecified	unspecified	unspecified	O2'(hydroxyl)-O2'(hydroxyl)[3.01]_N3-O2'(hydroxyl)[2.81]		(1,1)	3	4	3	3	1	0	0	0	1
1l9a.cif1	intra	0	20	B.A.172.	B.C.126.	B.G.224.	WC	19-XIX	cWW	cW-W	X	A|C-G	JC	S	S	LC	LC	SM	CCUAAGG	CGGCAUC	CGUGCUG				signal recognition particle RNA S domain	signal recognition particle RNA S domain	signal recognition particle RNA S domain	unspecified	unspecified	unspecified		O2'(hydroxyl)-O2'(hydroxyl)[2.32]	(1,1)	3	8	7	7	0	0	0	0	0		cSS
1m5k.cif1	inter	0	21	B.A.10.	A.G.13.	B.C.25.	WC	19-XIX	cWW	cW-W	II	A|G-C	IC	IC	IC	SM	LR	LR	AGAAGUC	ACMGUCC	AAACACA				RNA HAIRPIN RIBOZYME	RNA INHIBITOR SUBSTRATE	RNA HAIRPIN RIBOZYME	unspecified	unspecified	unspecified		O2'(hydroxyl)-O3'[3.17]_O2'(hydroxyl)-O2'(hydroxyl)[2.55]_N3-O2'(hydroxyl)[2.82]	(1,1)	3	4	4	7	0	0	0	0	0
1m5k.cif1	intra	0	22	B.A.22.	B.A.23.	B.U.61.	WC	20-XX	cWW	cW-W	X	A|A-U	IC	IC	IC	SM	SM	SM	GAGAAAC	AGAAACA	UAUUACC				RNA HAIRPIN RIBOZYME	RNA HAIRPIN RIBOZYME	RNA HAIRPIN RIBOZYME	unspecified	unspecified	unspecified		N6(amino)-O2(carbonyl)[2.58]	(1,1)	2	7	7	9	1	0	0	0	1
1mhk.cif1	inter	0	23	S.A.9.	S.C.6.	L.G.9.	WC	19-XIX	cWW	cW-W	I	A|C-G	HC	S	S	LC	LC	SM	CGAACCG	AUGCGAA	CUAGUGU				RNA 12-mer BCh12	RNA 12-mer BCh12	RNA 14-mer BCh12	unspecified	unspecified	unspecified		N1-O2'(hydroxyl)[2.58]_N3-N2(amino)[3.21]	(1,1)	3	6	6	6	0	0	0	0	0		tSS
1mms.cif1	intra	6	24	C.A.1084.	C.G.1054.	C.C.1105.	WC	19-XIX	cWW	cW-W	II	A|G-C	JC	S	S	LC	LC	SM	UUUAAAG	GCUGGGA	CACCAGC				23S RIBOSOMAL RNA	23S RIBOSOMAL RNA	23S RIBOSOMAL RNA	unspecified	unspecified	unspecified		O2'(hydroxyl)-O3'[3.27]_O2'(hydroxyl)-O2'(hydroxyl)[2.89]_N3-O2'(hydroxyl)[2.64]	(2,2)	3	9	5	5	0	0	0	0	0		cSS
1mms.cif1	intra	6	24	C.A.1085.	C.G.1055.	C.C.1104.	WC	19-XIX	cWW	cW-W	I	A|G-C	JC	S	S	LC	LC	SM	UUAAAGA	CUGGGAU	UCACCAG				23S RIBOSOMAL RNA	23S RIBOSOMAL RNA	23S RIBOSOMAL RNA	unspecified	unspecified	unspecified	N1-O2'(hydroxyl)[2.69]_N3-N2(amino)[3.27]	O3'-O2'(hydroxyl)[3.12]_O2'(hydroxyl)-O2'(hydroxyl)[2.49]_O2'(hydroxyl)-O2(carbonyl)[3.13]	(2,2)	3	9	5	5	0	0	0	0	0	tSS
1mzp.cif1	intra	0	25	B.A.44.	B.G.23.	B.C.32.	WC	19-XIX	cWW	cW-W	I	A|G-C	IC	S	S	LC	LC	SM	AAUACCA	GGAGCCG	AGGCGCC				fragment of 23S rRNA	fragment of 23S rRNA	fragment of 23S rRNA	unspecified	unspecified	unspecified	N1-O2'(hydroxyl)[3.08]_N3-N2(amino)[3.13]	O2'(hydroxyl)-O2'(hydroxyl)[2.95]	(1,1)	3	12	3	3	0	1	0	0	1	tSS
1n32.cif1	inter	7	26	A.A.1492.	Y.A.35.	Z.U.2.	WC	20-XX	cWW	cW-W	II	A|A-U	IC	S	S	LR	LR	SM	GCGAAGU	UUGAGGM	NNUUUUU	abAB	1,2,-1,-2	2	16S RIBOSOMAL RNA	ANTICODON STEM-LOOP OF LEU-2 TRANSFER RNA	A-SITE MESSENGER RNA FRAGMENT	thermus thermophilus	thermus thermophilus	thermus thermophilus		O2'(hydroxyl)-O3'[3.40]_O2'(hydroxyl)-O2'(hydroxyl)[3.01]_N3-O2'(hydroxyl)[2.56]	(2,2)	3	4	3	3	1	0	0	0	1
1n32.cif1	inter	7	26	A.A.1493.	Y.G.36.	Z.U.1.	WB	28-XXVIII	cWW	cW-W	I	A|G-U	IC	S	S	LR	LR	SM	CGAAGUC	UGAGGMG	NNNUUUU	abAB	1,2,-1,-2	2	16S RIBOSOMAL RNA	ANTICODON STEM-LOOP OF LEU-2 TRANSFER RNA	A-SITE MESSENGER RNA FRAGMENT	thermus thermophilus	thermus thermophilus	thermus thermophilus	N1-O2'(hydroxyl)[2.52]_N3-N2(amino)[3.10]	O2'(hydroxyl)-O2'(hydroxyl)[3.38]	(2,2)	3	4	3	3	0	0	0	0	0	tSS
1s03.cif1	intra	0	27	A.A.14.	A.A.12.	A.U.38.	WC	20-XX	cWW	cW-W	X	A|A-U	BC	S	S	LC	LC	SM	GAAACUG	GCGAAAC	AAGUCCC				47-MER	47-MER	47-MER	unspecified	unspecified	unspecified		N6(amino)-O2(carbonyl)[2.96]	(1,1)	3	2	2	2	1	0	0	0	1		cWW
1s03.cif1	intra	0	28	B.A.14.	B.A.12.	B.U.38.	WC	20-XX	cWW	cW-W	X	A|A-U	BC	S	S	LC	LC	SM	GAAACUG	GCGAAAC	AAGUCCC				47-MER	47-MER	47-MER	unspecified	unspecified	unspecified		N6(amino)-O2(carbonyl)[2.81]	(1,1)	3	2	2	2	1	0	0	0	1		cWW
1saq.cif1	inter	0	29	E.A.305.	A.G.101.	B.C.116.	WC	19-XIX	cWW	cW-W	II	A|G-C	NA	S	S	LR	LR	SM	MCGAGCC	NNNGMCG	AGCCNNN				5'-R(*GP*IP*CP*GP*AP*GP*CP*C)-3'	5'-R(*GP*IP*CP*GP*AP*GP*CP*C)-3'	5'-R(*GP*IP*CP*GP*AP*GP*CP*C)-3'	unspecified	unspecified	unspecified		O2'(hydroxyl)-O2'(hydroxyl)[2.86]	(1,1)	3	8	3	3	0	0	0	0	0
1u9s.cif1	intra	0	30	A.A.172.	A.C.119.	A.G.222.	WC	19-XIX	cWW	cW-W	X	A|C-G	JC	S	S	LC	LC	SM	GUGAAAC	UGCCACA	CACGGCA				RIBONUCLEASE P	RIBONUCLEASE P	RIBONUCLEASE P	unspecified	unspecified	unspecified	N6(amino)-O2'(hydroxyl)[2.35]		(1,1)	3	7	3	3	1	0	0	0	1
1u9s.cif1	intra	8	31	A.A.184.	A.C.135.	A.G.163.	WC	19-XIX	cWW	cW-W	X	A|C-G	HC	S	S	LR	LR	SM	GGUAAGA	CCGCCAG	CGGGCAA				RIBONUCLEASE P	RIBONUCLEASE P	RIBONUCLEASE P	unspecified	unspecified	unspecified		N6(amino)-O2'(hydroxyl)[2.89]	(2,2)	3	7	3	3	1	0	0	0	1		tWS
1u9s.cif1	intra	8	31	A.A.184.	A.C.136.	A.G.162.	WC	19-XIX	cWW	cW-W	X	A|C-G	HC	S	S	LR	LR	SM	GGUAAGA	CGCCAGC	GCGGGCA				RIBONUCLEASE P	RIBONUCLEASE P	RIBONUCLEASE P	unspecified	unspecified	unspecified	O2'(hydroxyl)-O3'[2.78]_O2'(hydroxyl)-O2'(hydroxyl)[2.69]_N3-O2'(hydroxyl)[2.48]		(2,2)	3	7	3	3	1	0	0	0	1
1u9s.cif1	intra	8	31	A.A.185.	A.C.135.	A.G.163.	WC	19-XIX	cWW	cW-W	I	A|C-G	HC	S	S	LR	LR	SM	GUAAGAG	CCGCCAG	CGGGCAA				RIBONUCLEASE P	RIBONUCLEASE P	RIBONUCLEASE P	unspecified	unspecified	unspecified	O2'(hydroxyl)-O2'(hydroxyl)[3.20]	N1-O2'(hydroxyl)[2.70]_N3-N2(amino)[3.13]	(2,2)	3	7	3	3	1	0	0	0	1		tSS	Hairpin	Stem
1u9s.cif1	intra	9	32	A.A.207.	A.C.81.	A.G.93.	WC	19-XIX	cWW	cW-W	II	A|C-G	HC	S	S	LR	LR	SM	GGCAACA	UGCCAGG	CCUGGGC				RIBONUCLEASE P	RIBONUCLEASE P	RIBONUCLEASE P	unspecified	unspecified	unspecified	O2'(hydroxyl)-O2'(hydroxyl)[2.91]		(2,2)	3	4	5	5	1	1	0	0	1
1u9s.cif1	intra	9	32	A.A.208.	A.C.80.	A.G.94.	WC	19-XIX	cWW	cW-W	I	A|C-G	HC	S	S	LR	LR	SM	GCAACAG	GUGCCAG	CUGGGCG				RIBONUCLEASE P	RIBONUCLEASE P	RIBONUCLEASE P	unspecified	unspecified	unspecified	O2'(hydroxyl)-O2'(hydroxyl)[3.19]_O2'(hydroxyl)-O2(carbonyl)[3.05]	N1-O2'(hydroxyl)[3.05]_N3-N2(amino)[3.23]	(2,2)	3	4	5	5	1	1	0	0	1		tSS	Hairpin	Multi Loop
1u9s.cif1	intra	10	33	A.A.220.	A.C.196.	A.G.217.	WC	19-XIX	cWW	cW-W	X	A|C-G	JC	S	S	LC	LC	SM	GGCACGG	CCGCCUG	CGGGGCA				RIBONUCLEASE P	RIBONUCLEASE P	RIBONUCLEASE P	unspecified	unspecified	unspecified		N6(amino)-N3[2.95]	(1,2)	3	4	9	9	0	0	0	0	0		cWS
1u9s.cif1	intra	10	33	A.A.220.	A.C.197.	A.G.216.	WC	19-XIX	cWW	cW-W	X	A|C-G	JC	S	S	LC	LC	SM	GGCACGG	CGCCUGG	CCGGGGC				RIBONUCLEASE P	RIBONUCLEASE P	RIBONUCLEASE P	unspecified	unspecified	unspecified	N6(amino)-O2(carbonyl)[3.27]		(1,2)	3	4	9	9	0	0	0	0	0	cHS
1vq6.cif1	inter	0	34	4.5AA.76.	0.U.2541.	0.G.2618.	WB	28-XXVIII	cWW	cW-W	I	a|U-G	NA	S	S	LR	LR	SM	NNCMMNN	AUGUCGG	UGGGMUM				5'-R(*CP*(5AA)*(HFA))-3'	23S ribosomal rna	23S ribosomal rna	unspecified	haloarcula marismortui	haloarcula marismortui	O2'(hydroxyl)-O2'(hydroxyl)[3.47]	N3-N2(amino)[2.79]_N1-O2'(hydroxyl)[2.89]	(1,1)	3	3	2	2	0	0	0	0	0		tSS
1xmq.cif1	inter	11	35	A.A.1492.	W.A.2.	X.U.35.	WC	20-XX	cWW	cW-W	II	A|A-U	IC	S	S	LR	LR	SM	GCGAAGU	NNAAAAN	CUUUUMA	abAB	1,2,-1,-2	1	16s ribosomal RNA	A-Site Messenger RNA	Anticodon RNA	thermus thermophilus	unspecified	unspecified	N3-O2'(hydroxyl)[2.85]		(2,2)	3	4	3	3	1	0	0	0	1	cSS
1xmq.cif1	inter	11	35	A.A.1493.	W.A.1.	X.U.36.	WC	20-XX	cWW	cW-W	I	A|A-U	IC	S	S	LR	LR	SM	CGAAGUC	NNNAAAA	UUUUMAU	abAB	1,2,-1,-2	1	16s ribosomal RNA	A-Site Messenger RNA	Anticodon RNA	thermus thermophilus	unspecified	unspecified	O2'(hydroxyl)-O2'(hydroxyl)[2.95]	N1-O2'(hydroxyl)[2.63]	(2,2)	3	4	3	3	0	0	0	0	0
1y26.cif1	intra	0	36	X.A.23.	X.G.46.	X.C.53.	WC	19-XIX	cWW	cW-W	X	A|G-C	II	HP	HP	LR	LR	SM	UAUAAUC	GGAGUUU	CUACCAA				Vibrio vulnificus A-riboswitch	Vibrio vulnificus A-riboswitch	Vibrio vulnificus A-riboswitch	vibrio vulnificus	vibrio vulnificus	vibrio vulnificus	N6(amino)-O2'(hydroxyl)[3.08]_N6(amino)-N3[2.92]_N1-N2(amino)[2.79]		(1,1)	2	3	8	8	0	0	0	0	0	tWS
1y26.cif1	intra	12	37	X.A.33.	X.G.37.	X.C.61.	WC	19-XIX	cWW	cW-W	II	A|G-C	HP	S	S	LC	LC	SM	AUGAUAU	UAUGGUU	AGCCUUA	abAcBC	1,2,-1,3,-2,-3	2	Vibrio vulnificus A-riboswitch	Vibrio vulnificus A-riboswitch	Vibrio vulnificus A-riboswitch	vibrio vulnificus	vibrio vulnificus	vibrio vulnificus	O2'(hydroxyl)-O2'(hydroxyl)[3.01]_N3-O2'(hydroxyl)[2.45]		(3,2)	4	6	2	2	0	0	0	0	0
1y26.cif1	intra	12	37	X.A.65.	X.G.37.	X.C.61.	WC	19-XIX	cWW	cW-W	X	A|G-C	HP	S	S	LC	LC	SM	UUAAACU	UAUGGUU	AGCCUUA	abAcBC	1,2,-1,3,-2,-3	2	Vibrio vulnificus A-riboswitch	Vibrio vulnificus A-riboswitch	Vibrio vulnificus A-riboswitch	vibrio vulnificus	vibrio vulnificus	vibrio vulnificus	N6(amino)*N2(amino)[3.23]	N6(amino)-O2(carbonyl)[2.95]_N1-O2'(hydroxyl)[2.85]	(3,2)	4	5	2	2	0	0	0	0	0	cH.	cWS
1y26.cif1	intra	12	37	X.A.66.	X.G.38.	X.C.60.	WC	19-XIX	cWW	cW-W	X	A|G-C	HP	S	S	LC	LC	SM	UAAACUC	AUGGUUU	GAGCCUU	abAcBC	1,2,-1,3,-2,-3	2	Vibrio vulnificus A-riboswitch	Vibrio vulnificus A-riboswitch	Vibrio vulnificus A-riboswitch	vibrio vulnificus	vibrio vulnificus	vibrio vulnificus	N6(amino)-N3[3.23]_N1-N2(amino)[2.77]		(3,2)	4	5	2	2	0	0	0	0	0	tWS
1y27.cif1	intra	0	38	X.A.23.	X.G.46.	X.C.53.	WC	19-XIX	cWW	cW-W	X	A|G-C	II	HP	HP	LR	LR	SM	UAUAAUC	CAAGUUU	CUACCGG				Bacillus subtilis xpt	Bacillus subtilis xpt	Bacillus subtilis xpt	bacillus subtilis	bacillus subtilis	bacillus subtilis	N6(amino)-O2'(hydroxyl)[2.97]_N6(amino)-N3[3.18]_N1-N2(amino)[3.15]		(1,1)	2	5	10	10	0	0	0	0	0	tWS
1y27.cif1	intra	13	39	X.A.33.	X.G.37.	X.C.61.	WC	19-XIX	cWW	cW-W	II	A|G-C	HP	S	S	LC	LC	SM	UGGAUAU	UAUGGCA	CACCGUA	abAcBC	1,2,-1,3,-2,-3	2	Bacillus subtilis xpt	Bacillus subtilis xpt	Bacillus subtilis xpt	bacillus subtilis	bacillus subtilis	bacillus subtilis	O2'(hydroxyl)-O2'(hydroxyl)[2.62]_N3-O2'(hydroxyl)[2.89]		(3,2)	4	5	2	2	0	0	0	0	0
1y27.cif1	intra	13	39	X.A.65.	X.G.37.	X.C.61.	WC	19-XIX	cWW	cW-W	X	A|G-C	HP	S	S	LC	LC	SM	GUAAAUG	UAUGGCA	CACCGUA	abAcBC	1,2,-1,3,-2,-3	2	Bacillus subtilis xpt	Bacillus subtilis xpt	Bacillus subtilis xpt	bacillus subtilis	bacillus subtilis	bacillus subtilis	N6(amino)*N2(amino)[3.25]	N6(amino)-O2(carbonyl)[3.17]_N1-O2'(hydroxyl)[2.70]	(3,2)	4	5	2	2	1	0	0	0	1	cH.	cWS
1y27.cif1	intra	13	39	X.A.66.	X.G.38.	X.C.60.	WC	19-XIX	cWW	cW-W	X	A|G-C	HP	S	S	LC	LC	SM	UAAAUGU	AUGGCAC	GCACCGU	abAcBC	1,2,-1,3,-2,-3	2	Bacillus subtilis xpt	Bacillus subtilis xpt	Bacillus subtilis xpt	bacillus subtilis	bacillus subtilis	bacillus subtilis	N1-N2(amino)[3.21]		(3,2)	4	5	2	2	0	0	0	0	0	tWS
2a43.cif1	intra	0	40	A.A.20.	A.G.3.	A.C.16.	WC	19-XIX	cWW	cW-W	I	A|G-C	HP	S	S	LC	LC	SM	UCAAACA	NNNGCGG	CCGCUCA	abAB	1,2,-1,-2	1	RNA Pseudoknot	RNA Pseudoknot	RNA Pseudoknot	unspecified	unspecified	unspecified	N1-O2'(hydroxyl)[2.73]_N3-N2(amino)[2.94]	O2'(hydroxyl)-O2'(hydroxyl)[2.60]_O2'(hydroxyl)-O2(carbonyl)[2.61]	(1,1)	3	9	4	4	0	1	0	0	1	tSS
2a43.cif1	intra	14	41	A.A.23.	A.G.5.	A.C.14.	WC	19-XIX	cWW	cW-W	X	A|G-C	HP	S	S	LC	LC	SM	AACAAAC	NGCGGCA	GUCCGCU	abAB	1,2,-1,-2	1	RNA Pseudoknot	RNA Pseudoknot	RNA Pseudoknot	unspecified	unspecified	unspecified	N6(amino)*N2(amino)[3.42]	N6(amino)-O2(carbonyl)[2.90]_N1-O2'(hydroxyl)[2.75]	(3,2)	3	9	4	4	0	1	0	0	1	cH.	cWS
2a43.cif1	intra	14	41	A.A.24.	A.G.6.	A.C.13.	WC	19-XIX	cWW	cW-W	X	A|G-C	HP	S	S	LC	LC	SM	ACAAACG	GCGGCAC	CGUCCGC	abAB	1,2,-1,-2	1	RNA Pseudoknot	RNA Pseudoknot	RNA Pseudoknot	unspecified	unspecified	unspecified	N6(amino)-O2'(hydroxyl)[2.99]_N6(amino)-N3[3.00]_N1-N2(amino)[3.03]		(3,2)	3	9	4	4	0	0	0	0	0	tWS
2a43.cif1	intra	14	41	A.A.25.	A.G.6.	A.C.13.	WC	19-XIX	cWW	cW-W	X	A|G-C	HP	S	S	LC	LC	SM	CAAACGG	GCGGCAC	CGUCCGC	abAB	1,2,-1,-2	1	RNA Pseudoknot	RNA Pseudoknot	RNA Pseudoknot	unspecified	unspecified	unspecified		N6(amino)-O2(carbonyl)[2.92]_N1-O2'(hydroxyl)[2.60]	(3,2)	3	9	4	4	0	0	0	0	0		cWS
2bte.cif1	inter	15	42	B.A.47.B	E.G.7.	E.C.66.	WC	19-XIX	cWW	cW-W	II	A|G-C	HC	S	S	LR	LR	SM	CGCAAGC	GGGGUGG	CGCCCCC				TRNALEU TRANSCRIPT WITH ANTICODON CAG	TRNALEU TRANSCRIPT WITH ANTICODON CAG	TRNALEU TRANSCRIPT WITH ANTICODON CAG	thermus thermophilus	thermus thermophilus	thermus thermophilus		O2'(hydroxyl)-O3'[3.04]_O2'(hydroxyl)-O2'(hydroxyl)[2.71]_N3-O2'(hydroxyl)[2.91]	(2,2)	5	4	7	7	1	0	0	0	1
2bte.cif1	inter	15	42	B.A.47.C	E.G.49.	E.C.65.	WC	19-XIX	cWW	cW-W	I	A|G-C	HC	S	S	LR	LR	SM	GCAAGCG	CGUGCGG	CCGCCCC				TRNALEU TRANSCRIPT WITH ANTICODON CAG	TRNALEU TRANSCRIPT WITH ANTICODON CAG	TRNALEU TRANSCRIPT WITH ANTICODON CAG	thermus thermophilus	thermus thermophilus	thermus thermophilus	N1-O2'(hydroxyl)[2.73]_N3-N2(amino)[3.28]	O2'(hydroxyl)-O2'(hydroxyl)[2.55]	(2,2)	5	4	5	5	1	0	0	0	1	tWS
2bte.cif1	inter	16	43	E.A.47.B	B.G.7.	B.C.66.	WC	19-XIX	cWW	cW-W	II	A|G-C	HC	S	S	LR	LR	SM	CGCAAGC	GGGGUGG	CGCCCCC				TRNALEU TRANSCRIPT WITH ANTICODON CAG	TRNALEU TRANSCRIPT WITH ANTICODON CAG	TRNALEU TRANSCRIPT WITH ANTICODON CAG	thermus thermophilus	thermus thermophilus	thermus thermophilus		O2'(hydroxyl)-O3'[3.00]_O2'(hydroxyl)-O2'(hydroxyl)[2.55]_N3-O2'(hydroxyl)[2.73]	(2,2)	5	4	7	7	1	0	0	0	1		cSS
2bte.cif1	inter	16	43	E.A.47.C	B.G.49.	B.C.65.	WC	19-XIX	cWW	cW-W	I	A|G-C	HC	S	S	LR	LR	SM	GCAAGCG	CGUGCGG	CCGCCCC				TRNALEU TRANSCRIPT WITH ANTICODON CAG	TRNALEU TRANSCRIPT WITH ANTICODON CAG	TRNALEU TRANSCRIPT WITH ANTICODON CAG	thermus thermophilus	thermus thermophilus	thermus thermophilus	N1-O2'(hydroxyl)[2.82]_N3-N2(amino)[3.01]	O2'(hydroxyl)-O2'(hydroxyl)[2.51]_O2'(hydroxyl)-O2(carbonyl)[3.35]	(2,2)	5	4	5	5	1	0	0	0	1	tWS
2gdi.cif1	intra	17	44	X.A.41.	X.G.18.	X.C.48.	WC	19-XIX	cWW	cW-W	II	A|G-C	ICIP	S	S	LC	LC	SM	CUGAGAA	CGGGGUG	AUACCCG	abAcBC	1,2,3,4,5,-4,-3,-2,-1,6,7,8,9,-5,-9,-8,-7,-6	2	TPP riboswitch	TPP riboswitch	TPP riboswitch	unspecified	unspecified	unspecified		O2'(hydroxyl)-O2'(hydroxyl)[2.92]_N3-O2'(hydroxyl)[2.57]	(3,3)	5	9	4	4	1	0	0	0	1		cSS
2gdi.cif1	intra	18	45	X.A.43.	X.G.21.	X.C.38.	WC	19-XIX	cWW	cW-W	X	A|G-C	ICIP	S	S	LC	LC	SM	GAGAAAU	GGUGCCC	AGGCUGA	abAcBC	1,2,3,4,5,-4,-3,-2,-1,6,7,8,9,-5,-9,-8,-7,-6	3	TPP riboswitch	TPP riboswitch	TPP riboswitch	unspecified	unspecified	unspecified	O2'(hydroxyl)-N7[3.28]_O2'(hydroxyl)-O6(carbonyl)[2.92]		(3,2)	4	9	3	3	1	0	0	0	1
2gdi.cif1	intra	17	44	X.A.56.	X.G.17.	X.C.49.	WC	19-XIX	cWW	cW-W	I	A|G-C	IPJC	S	S	LC	LC	SM	AUCACCU	UCGGGGU	UACCCGU	abAcBC	1,2,3,4,5,-4,-3,-2,-1,6,7,8,9,-5,-9,-8,-7,-6	2	TPP riboswitch	TPP riboswitch	TPP riboswitch	unspecified	unspecified	unspecified	N1-O2'(hydroxyl)[2.85]_N3-N2(amino)[3.11]	O2'(hydroxyl)-O2'(hydroxyl)[2.79]	(3,3)	5	5	4	4	0	1	1	0	1	tSS
2gdi.cif1	intra	18	45	X.A.69.	X.C.22.	X.G.37.	WC	19-XIX	cWW	cW-W	X	A|C-G	HC	S	S	LR	LR	SM	GAUAAUG	GUGCCCU	AAGGCUG	abAcBC	1,2,3,4,5,-4,-3,-2,-1,6,7,8,9,-5,-9,-8,-7,-6	3	TPP riboswitch	TPP riboswitch	TPP riboswitch	unspecified	unspecified	unspecified		N1-N2(amino)[3.08]	(3,2)	4	6	3	3	0	0	0	0	0		tWS
2gdi.cif1	intra	18	45	X.A.70.	X.C.22.	X.G.37.	WC	19-XIX	cWW	cW-W	II	A|C-G	HC	S	S	LR	LR	SM	AUAAUGC	GUGCCCU	AAGGCUG	abAcBC	1,2,3,4,5,-4,-3,-2,-1,6,7,8,9,-5,-9,-8,-7,-6	3	TPP riboswitch	TPP riboswitch	TPP riboswitch	unspecified	unspecified	unspecified	O2'(hydroxyl)-O3'[3.06]_O2'(hydroxyl)-O2'(hydroxyl)[2.74]_N3-O2'(hydroxyl)[2.74]		(3,2)	4	6	3	3	0	0	0	0	0
2gdi.cif1	intra	17	44	X.A.84.	X.G.16.	X.C.50.	WC	19-XIX	cWW	cW-W	I	A|G-C	IPJC	S	S	LC	LC	SM	GGGAAGU	CUCGGGG	ACCCGUA	abAcBC	1,2,3,4,5,-4,-3,-2,-1,6,7,8,9,-5,-9,-8,-7,-6	2	TPP riboswitch	TPP riboswitch	TPP riboswitch	unspecified	unspecified	unspecified	O2'(hydroxyl)-O2'(hydroxyl)[2.78]_N3-N2(amino)[3.14]	N1-O2'(hydroxyl)[2.49]	(3,3)	5	2	4	4	1	0	0	0	1	cSS	tWS
2gjw.cif1	inter	0	46	I.A.15.	I.C.12.	J.G.9.	WC	19-XIX	cWW	cW-W	X	A|C-G	BC	S	S	LC	LC	SM	CAMAGCU	GACCAMA	AGCGGUC				5'-R(*GP*CP*GP*AP*CP*CP*GP*AP*CP*CP*AP*(DU)P*AP*GP*CP*UP*GP*CP*A)-3'	5'-R(*GP*CP*GP*AP*CP*CP*GP*AP*CP*CP*AP*(DU)P*AP*GP*CP*UP*GP*CP*A)-3'	5'-R(*UP*GP*CP*AP*GP*CP*GP*GP*UP*CP*AP*(A23))-3'	unspecified	unspecified	unspecified		N6(amino)-O2'(hydroxyl)[3.28]_N1-O2'(hydroxyl)[2.55]	(1,1)	3	3	4	4	0	0	0	0	0		tWS
2gjw.cif1	inter	0	47	L.A.15.	I.G.9.	J.C.12.	WC	19-XIX	cWW	cW-W	I	A|G-C	BC	S	S	LC	LC	SM	NNNAGGU	ACCGACC	GGUCAMN				5'-R(*AP*GP*GP*UP*CP*GP*C)-3'	5'-R(*GP*CP*GP*AP*CP*CP*GP*AP*CP*CP*AP*(DU)P*AP*GP*CP*UP*GP*CP*A)-3'	5'-R(*UP*GP*CP*AP*GP*CP*GP*GP*UP*CP*AP*(A23))-3'	unspecified	unspecified	unspecified	N1-O2'(hydroxyl)[2.56]		(1,1)	3	1	4	4	0	0	0	0	0	tSS
2hvy.cif1	intra	0	48	E.A.58.	E.G.2.	E.C.56.	WC	19-XIX	cWW	cW-W	X	A|G-C	HC	S	S	LC	LC	SM	CCCACAG	NNGGGUC	GACCCAC				H/ACA RNA	H/ACA RNA	H/ACA RNA	unspecified	unspecified	unspecified		N7-O2'(hydroxyl)[2.59]_N6(amino)-O2(carbonyl)[3.37]	(1,1)	3	8	9	9	0	0	0	0	0		cHS
2hw8.cif1	intra	0	49	B.A.28.	B.G.13.	B.C.22.	WC	19-XIX	cWW	cW-W	I	A|G-C	IC	S	S	LC	LC	SM	GAAACUU	GGAGGCU	GGCCGCG				36-MER	36-MER	36-MER	unspecified	unspecified	unspecified	N1-O2'(hydroxyl)[2.95]_N3-N2(amino)[3.03]	O2'(hydroxyl)-O2'(hydroxyl)[2.90]	(1,1)	3	6	3	3	1	0	0	0	1	tSS
2oeu.cif1	inter	0	50	A.A.37.	A.A.38.	B.OMC.6.	NA	n/a	cWW	cW-W	X	A|A-c	JC	JC	JC	SM	SM	SM	ACGAAAC	CGAAACG	CGUMCUG				Hammerhead Ribozyme	Hammerhead Ribozyme	5'-R(*GP*GP*CP*GP*UP*(OMC)P*CP*UP*GP*GP*(5BU)P*AP*UP*CP*CP*AP*AP*UP*CP*(DC))-3'	unspecified	unspecified	unspecified		N6(amino)-O2(carbonyl)[3.13]	(1,1)	2	3	3	1	1	0	0	0	1		tHW
2oeu.cif1	inter	0	51	B.A.17.	A.U.4.	B.C.15.	NA	n/a	cWW	cW-W	X	A|U-C	IC	IC	IC	SM	SM	SM	CCAAUCM	MGAUGUA	AUCCAAU				5'-R(*GP*GP*CP*GP*UP*(OMC)P*CP*UP*GP*GP*(5BU)P*AP*UP*CP*CP*AP*AP*UP*CP*(DC))-3'	Hammerhead Ribozyme	5'-R(*GP*GP*CP*GP*UP*(OMC)P*CP*UP*GP*GP*(5BU)P*AP*UP*CP*CP*AP*AP*UP*CP*(DC))-3'	unspecified	unspecified	unspecified	N6(amino)-O2(carbonyl)[2.81]		(1,1)	2	5	5	5	0	0	0	0	0	cWW
2oiu.cif1	inter	19	52	P.A.62.	Q.C.5.	Q.G.47.	WC	19-XIX	cWW	cW-W	II	A|C-G	HC	S	S	LR	LR	SM	CGAAAGG	GACCUCG	GGAGGUU				L1 Ribozyme RNA Ligase	L1 Ribozyme RNA Ligase	L1 Ribozyme RNA Ligase	unspecified	unspecified	unspecified	O2'(hydroxyl)-O2'(hydroxyl)[2.79]_N3-O2'(hydroxyl)[3.07]		(2,2)	3	4	6	6	1	0	0	0	1
2oiu.cif1	inter	19	52	P.A.63.	Q.C.4.	Q.G.48.	WC	19-XIX	cWW	cW-W	I	A|C-G	HC	S	S	LR	LR	SM	GAAAGGA	GGACCUC	GAGGUUA				L1 Ribozyme RNA Ligase	L1 Ribozyme RNA Ligase	L1 Ribozyme RNA Ligase	unspecified	unspecified	unspecified	O2'(hydroxyl)-O2'(hydroxyl)[2.73]	N1-O2'(hydroxyl)[2.73]_N3-N2(amino)[3.16]	(2,2)	3	4	6	6	1	0	0	0	1		tSS
2oiu.cif1	inter	20	53	Q.A.61.	P.C.5.	P.G.47.	WC	19-XIX	cWW	cW-W	X	A|C-G	HC	S	S	LR	LR	SM	CCGAAAG	GACCUCG	GGAGGUU				L1 Ribozyme RNA Ligase	L1 Ribozyme RNA Ligase	L1 Ribozyme RNA Ligase	unspecified	unspecified	unspecified		N1-N2(amino)[3.23]	(3,2)	3	4	6	6	1	0	0	0	1		tWS
2oiu.cif1	inter	20	53	Q.A.62.	P.C.4.	P.G.48.	WC	19-XIX	cWW	cW-W	X	A|C-G	HC	S	S	LR	LR	SM	CGAAAGG	GGACCUC	GAGGUUA				L1 Ribozyme RNA Ligase	L1 Ribozyme RNA Ligase	L1 Ribozyme RNA Ligase	unspecified	unspecified	unspecified		N6(amino)-O2'(hydroxyl)[2.93]_N1-O2'(hydroxyl)[2.71]	(3,2)	3	4	6	6	1	0	0	0	1
2oiu.cif1	inter	20	53	Q.A.62.	P.C.5.	P.G.47.	WC	19-XIX	cWW	cW-W	X	A|C-G	HC	S	S	LR	LR	SM	CGAAAGG	GACCUCG	GGAGGUU				L1 Ribozyme RNA Ligase	L1 Ribozyme RNA Ligase	L1 Ribozyme RNA Ligase	unspecified	unspecified	unspecified	O2'(hydroxyl)-O3'[3.16]_O2'(hydroxyl)-O2'(hydroxyl)[2.61]_N3-O2'(hydroxyl)[2.89]		(3,2)	3	4	6	6	1	0	0	0	1
2oiu.cif1	inter	20	53	Q.A.63.	P.C.4.	P.G.48.	WC	19-XIX	cWW	cW-W	I	A|C-G	HC	S	S	LR	LR	SM	GAAAGGA	GGACCUC	GAGGUUA				L1 Ribozyme RNA Ligase	L1 Ribozyme RNA Ligase	L1 Ribozyme RNA Ligase	unspecified	unspecified	unspecified	O2'(hydroxyl)-O2'(hydroxyl)[2.73]_O2'(hydroxyl)-O2(carbonyl)[2.91]	N3-N2(amino)[3.41]	(3,2)	3	4	6	6	1	0	0	0	1		tSS
2p7e.cif1	inter	0	54	C.A.24.	A.C.4.	B.G.11.	WC	19-XIX	cWW	cW-W	X	A|C-G	IC	S	S	LR	LR	SM	GAAACAC	UCCCMNN	GAAGGGM	abAB	1,2,-1,-2	1	Ribozyme strand II	5' substrate strand, pentameric fragment	Ribozyme strand I	unspecified	unspecified	unspecified		O2'(hydroxyl)-O2'(hydroxyl)[2.77]_N3-O2'(hydroxyl)[2.81]	(1,1)	3	7	3	3	1	1	0	0	1
2qus.cif1	intra	0	55	A.A.52.	A.C.12.	A.A.53.	NA	n/a	cWW	cW-W	X	A|C-A	JC	JC	JC	SM	SM	SM	ACAAAAC	UGUCACC	CAAAACA				Hammerhead ribozyme	Hammerhead ribozyme	Hammerhead ribozyme	unspecified	unspecified	unspecified	N6(amino)-O2(carbonyl)[2.96]		(1,1)	2	3	1	3	0	0	0	0	0	tHW
2quw.cif1	inter	0	56	B.A.52.	A.CCC.12.	B.A.53.	NA	n/a	cWW	cW-W	X	A|c-A	JC	JC	JC	SM	SM	SM	ACAAAAC	UGUMNNN	CAAAACA				Hammerhead ribozyme, cleaved fragment	Hammerhead ribozyme, cleaved fragment	Hammerhead ribozyme, cleaved fragment	unspecified	unspecified	unspecified	N6(amino)-O2(carbonyl)[2.87]		(1,1)	2	3	1	3	0	0	0	0	0	tHW
2qwy.cif1	intra	21	57	C.A.33.	C.G.3.	C.C.29.	WC	19-XIX	cWW	cW-W	X	A|G-C	HP	S	S	LC	LC	SM	GUGAUAA	NGCGCGG	UCGCGUG	abAB	1,2,3,4,-1,-4,-3,-2	1	SAM-II riboswitch	SAM-II riboswitch	SAM-II riboswitch	unspecified	unspecified	unspecified		N6(amino)-O2(carbonyl)[2.98]_N1-O2'(hydroxyl)[3.00]	(4,3)	3	11	6	6	1	0	0	0	1		cWS
2qwy.cif1	intra	21	57	C.A.33.	C.C.4.	C.G.28.	WC	19-XIX	cWW	cW-W	X	A|C-G	HP	S	S	LC	LC	SM	GUGAUAA	GCGCGGC	GUCGCGU	abAB	1,2,3,4,-1,-4,-3,-2	1	SAM-II riboswitch	SAM-II riboswitch	SAM-II riboswitch	unspecified	unspecified	unspecified	N7-O2'(hydroxyl)[2.54]_N6(amino)-O2(carbonyl)[2.74]		(4,3)	3	11	6	6	1	0	0	0	1
2qwy.cif1	intra	21	57	C.A.35.	C.C.4.	C.G.28.	WC	19-XIX	cWW	cW-W	X	A|C-G	HP	S	S	LC	LC	SM	GAUAAAU	GCGCGGC	GUCGCGU	abAB	1,2,3,4,-1,-4,-3,-2	1	SAM-II riboswitch	SAM-II riboswitch	SAM-II riboswitch	unspecified	unspecified	unspecified		N1-N2(amino)[3.15]	(4,3)	3	11	6	6	0	0	0	0	0		cWS
2qwy.cif1	intra	21	57	C.A.35.	C.G.5.	C.C.27.	WC	19-XIX	cWW	cW-W	X	A|G-C	HP	S	S	LC	LC	SM	GAUAAAU	CGCGGCG	AGUCGCG	abAB	1,2,3,4,-1,-4,-3,-2	1	SAM-II riboswitch	SAM-II riboswitch	SAM-II riboswitch	unspecified	unspecified	unspecified	N6(amino)-O2'(hydroxyl)[2.80]		(4,3)	3	11	6	6	0	0	0	0	0
2qwy.cif1	intra	21	57	C.A.36.	C.G.5.	C.C.27.	WC	19-XIX	cWW	cW-W	X	A|G-C	HP	S	S	LC	LC	SM	AUAAAUG	CGCGGCG	AGUCGCG	abAB	1,2,3,4,-1,-4,-3,-2	1	SAM-II riboswitch	SAM-II riboswitch	SAM-II riboswitch	unspecified	unspecified	unspecified	N1-N2(amino)[3.05]		(4,3)	3	11	6	6	0	0	0	0	0	tWS
2qwy.cif1	intra	21	57	C.A.37.	C.G.5.	C.C.27.	WC	19-XIX	cWW	cW-W	II	A|G-C	HP	S	S	LC	LC	SM	UAAAUGU	CGCGGCG	AGUCGCG	abAB	1,2,3,4,-1,-4,-3,-2	1	SAM-II riboswitch	SAM-II riboswitch	SAM-II riboswitch	unspecified	unspecified	unspecified		O2'(hydroxyl)-O3'[2.90]_O2'(hydroxyl)-O2'(hydroxyl)[2.96]_N3-O2'(hydroxyl)[2.60]	(4,3)	3	11	6	6	0	0	0	0	0
2qwy.cif1	intra	0	58	C.A.41.	C.A.24.	C.U.40.	WC	20-XX	cWW	cW-W	X	A|A-U	HP	HP	HP	SM	SM	SM	UGUAGCU	UGCAGUC	AUGUAGC				SAM-II riboswitch	SAM-II riboswitch	SAM-II riboswitch	unspecified	unspecified	unspecified	N6(amino)-O2'(hydroxyl)[3.37]_N6(amino)-N3[3.55]	OP2*O5'[3.33]_O4'-O2'(hydroxyl)[3.03]	(1,1)	2	11	1	11	0	0	0	0	0	tHS
2qwy.cif1	intra	0	59	C.SAM.500.	C.G.22.	C.C.43.	WC	19-XIX	cWW	cW-W	X	a|G-C	NA	S	S	NA	NA	SM	GCGCGGC	AUUGCAG	UAGCUAA	abAB	1,2,3,4,-1,-4,-3,-2	4	SAM-II riboswitch	SAM-II riboswitch	SAM-II riboswitch	unspecified	unspecified	unspecified	O2'(hydroxyl)-N7[2.89]_O2'(hydroxyl)-O6(carbonyl)[3.27]		(1,1)	2	6	2	2	0	0	0	0	0
2r8s.cif1	intra	0	60	R.A.123.	R.C.121.	R.G.200.	WC	19-XIX	cWW	cW-W	X	A|C-G	IC	S	S	LC	LC	SM	UCAACAG	GGUCAAC	CAUGGUC				P4-P6 RNA RIBOZYME DOMAIN	P4-P6 RNA RIBOZYME DOMAIN	P4-P6 RNA RIBOZYME DOMAIN	unspecified	unspecified	unspecified	N3-O2'(hydroxyl)[2.81]	N1-N2(amino)[3.25]	(1,1)	3	5	6	6	0	1	0	0	1		tWW
2r8s.cif1	intra	22	61	R.A.152.	R.C.223.	R.G.250.	WC	19-XIX	cWW	cW-W	X	A|C-G	HC	S	S	LR	LR	SM	GGAAACU	GUCCUAA	UAUGGAU				P4-P6 RNA RIBOZYME DOMAIN	P4-P6 RNA RIBOZYME DOMAIN	P4-P6 RNA RIBOZYME DOMAIN	unspecified	unspecified	unspecified		N6(amino)-O2'(hydroxyl)[3.00]	(2,1)	3	4	4	4	1	0	0	0	1
2r8s.cif1	intra	22	61	R.A.153.	R.C.223.	R.G.250.	WC	19-XIX	cWW	cW-W	I	A|C-G	HC	S	S	LR	LR	SM	GAAACUU	GUCCUAA	UAUGGAU				P4-P6 RNA RIBOZYME DOMAIN	P4-P6 RNA RIBOZYME DOMAIN	P4-P6 RNA RIBOZYME DOMAIN	unspecified	unspecified	unspecified	O2'(hydroxyl)-O2'(hydroxyl)[2.67]_O2'(hydroxyl)-O2(carbonyl)[2.91]	N1-O2'(hydroxyl)[3.50]_N3-N2(amino)[3.18]	(2,1)	3	4	4	4	1	0	0	0	1		tSS
2r8s.cif1	intra	23	62	R.A.183.	R.G.110.	R.C.211.	WC	19-XIX	cWW	cW-W	II	A|G-C	IC	S	S	LR	LR	SM	GGUAAUA	UGCGGGA	ACACGCA				P4-P6 RNA RIBOZYME DOMAIN	P4-P6 RNA RIBOZYME DOMAIN	P4-P6 RNA RIBOZYME DOMAIN	unspecified	unspecified	unspecified	O2'(hydroxyl)-O3'[3.59]_O2'(hydroxyl)-O2'(hydroxyl)[2.70]_N3-O2'(hydroxyl)[2.69]		(2,2)	3	6	4	4	1	1	0	0	1
2r8s.cif1	intra	23	62	R.A.184.	R.C.109.	R.G.212.	WC	19-XIX	cWW	cW-W	I	A|C-G	IC	S	S	LR	LR	SM	GUAAUAA	UUGCGGG	CACGCAG				P4-P6 RNA RIBOZYME DOMAIN	P4-P6 RNA RIBOZYME DOMAIN	P4-P6 RNA RIBOZYME DOMAIN	unspecified	unspecified	unspecified	O2'(hydroxyl)-O2'(hydroxyl)[2.55]_O2'(hydroxyl)-O2(carbonyl)[2.73]	N1-O2'(hydroxyl)[2.61]_N3-N2(amino)[2.96]	(2,2)	3	6	4	4	1	1	0	0	1		tSS
2r8s.cif1	intra	0	63	R.A.186.	R.C.137.	R.G.181.	WC	19-XIX	cWW	cW-W	I	A|C-G	IC	S	S	LC	LC	SM	AAUAAGC	GUACCAA	AUGGUAA				P4-P6 RNA RIBOZYME DOMAIN	P4-P6 RNA RIBOZYME DOMAIN	P4-P6 RNA RIBOZYME DOMAIN	unspecified	unspecified	unspecified	O3'-O2'(hydroxyl)[2.93]_O2'(hydroxyl)-O2'(hydroxyl)[2.65]_O2'(hydroxyl)-O2(carbonyl)[2.60]	N6(amino)-O2'(hydroxyl)[3.38]_N1-O2'(hydroxyl)[2.57]_N3-N2(amino)[3.06]	(1,1)	3	6	3	3	0	1	0	0	1		tSS
2rfk.cif1	inter	0	64	E.A.21.	D.G.2.	E.C.19.	WC	19-XIX	cWW	cW-W	X	A|G-C	HP	S	S	LC	LC	SM	CCCACAC	NNGGGCU	AGCCCAC	abAB	1,2,3,-1,-3,-2	1	guide RNA 2	guide RNA 1	guide RNA 2	unspecified	unspecified	unspecified	N6(amino)*N2(amino)[3.35]_N1-N2(amino)[3.57]	N7-O2'(hydroxyl)[2.54]_N6(amino)-O2'(hydroxyl)[2.98]_N6(amino)-O2(carbonyl)[2.83]	(1,1)	3	6	9	9	0	0	0	0	0	cW.	cHS
2uxc.cif1	inter	24	65	A.A.1492.	X.G.36.	Y.C.2.	WC	19-XIX	cWW	cW-W	II	A|G-C	IC	S	S	LR	LR	SM	GCGAAGU	UACGAAA	NNUCGUU				16S RIBOSOMAL RNA	A-SITE MESSENGER RNA FRAGMENT CGGG	ANTICODON STEM-LOOP OF TRANSFER RNA WITH ANTICODON ACGA	thermus thermophilus	synthetic	synthetic		O2'(hydroxyl)-O3'[3.44]_O2'(hydroxyl)-O2'(hydroxyl)[2.82]_N3-O2'(hydroxyl)[2.55]	(2,2)	3	4	3	3	1	0	0	0	1		cSS
2uxc.cif1	inter	24	65	A.A.1493.	X.A.37.	Y.U.1.	WC	20-XX	cWW	cW-W	I	A|A-U	IC	S	S	LR	LR	SM	CGAAGUC	ACGAAAU	NNNUCGU				16S RIBOSOMAL RNA	A-SITE MESSENGER RNA FRAGMENT CGGG	ANTICODON STEM-LOOP OF TRANSFER RNA WITH ANTICODON ACGA	thermus thermophilus	synthetic	synthetic	N1-O2'(hydroxyl)[2.59]	O2'(hydroxyl)-O2'(hydroxyl)[2.81]_O2'(hydroxyl)-O2(carbonyl)[3.12]	(2,2)	3	4	3	3	0	0	0	0	0	tWS
2vpl.cif1	intra	0	66	B.A.39.	B.G.13.	B.C.33.	WC	19-XIX	cWW	cW-W	I	A|G-C	IC	S	S	LC	LC	SM	GAAACUU	GGAGGCU	AGCCGAG				FRAGMENT OF MRNA FOR L1-OPERON CONTAINING REGULATOR L1-BINDING SITE	FRAGMENT OF MRNA FOR L1-OPERON CONTAINING REGULATOR L1-BINDING SITE	FRAGMENT OF MRNA FOR L1-OPERON CONTAINING REGULATOR L1-BINDING SITE	methanocaldococcus jannaschii	methanocaldococcus jannaschii	methanocaldococcus jannaschii	N1-O2'(hydroxyl)[3.09]_N3-N2(amino)[3.35]	O2'(hydroxyl)-O2'(hydroxyl)[3.12]	(1,1)	3	6	4	4	1	0	0	0	1	tSS
2xd0.cif1	intra	25	67	W.A.19.	W.G.2.	W.C.15.	WC	19-XIX	cWW	cW-W	X	A|G-C	HP	S	S	LC	LC	SM	UUUAAGU	UCAGGUG	UACCUUU	abAB	1,2,-1,-2	1	TOXI	TOXI	TOXI	unspecified	unspecified	unspecified		O4'-O2'(hydroxyl)[3.08]_N3-O2'(hydroxyl)[2.73]	(2,2)	3	6	4	4	0	0	0	0	0		cSS
2xd0.cif1	intra	25	67	W.A.20.	W.G.3.	W.C.14.	WC	19-XIX	cWW	cW-W	I	A|G-C	HP	S	S	LC	LC	SM	UUAAGUG	CAGGUGA	CUACCUU	abAB	1,2,-1,-2	1	TOXI	TOXI	TOXI	unspecified	unspecified	unspecified	N1-O2'(hydroxyl)[2.75]_N3-N2(amino)[3.32]	O2'(hydroxyl)-O2'(hydroxyl)[3.01]_O2'(hydroxyl)-O2(carbonyl)[3.13]	(2,2)	3	6	4	4	0	0	0	0	0	tSS
2xdb.cif1	intra	26	68	G.A.19.	G.G.2.	G.C.15.	WC	19-XIX	cWW	cW-W	II	A|G-C	HP	S	S	LC	LC	SM	UUUAAGU	UCAGGUG	UACCUUU	abAB	1,2,-1,-2	1	TOXI	TOXI	TOXI	pectobacterium atrosepticum	pectobacterium atrosepticum	pectobacterium atrosepticum		O2'(hydroxyl)-O2'(hydroxyl)[2.93]_N3-O2'(hydroxyl)[2.62]	(2,2)	3	6	4	4	0	0	0	0	0
2xdb.cif1	intra	26	68	G.A.20.	G.G.3.	G.C.14.	WC	19-XIX	cWW	cW-W	I	A|G-C	HP	S	S	LC	LC	SM	UUAAGUG	CAGGUGA	CUACCUU	abAB	1,2,-1,-2	1	TOXI	TOXI	TOXI	pectobacterium atrosepticum	pectobacterium atrosepticum	pectobacterium atrosepticum	N1-O2'(hydroxyl)[2.68]_N3-N2(amino)[3.01]	O2'(hydroxyl)-O2'(hydroxyl)[2.75]_O2'(hydroxyl)-O2(carbonyl)[2.92]	(2,2)	3	6	4	4	0	0	0	0	0	tSS
2ygh.cif1	intra	0	69	A.A.12.	A.G.43.	A.C.59.	WC	19-XIX	cWW	cW-W	I	A|G-C	JI	S	S	LR	LR	SM	AAGAGAG	CCGGCAA	GUGCCAA				SAM-I RIBOSWITCH	SAM-I RIBOSWITCH	SAM-I RIBOSWITCH	thermoanaerobacter tengcongensis	thermoanaerobacter tengcongensis	thermoanaerobacter tengcongensis	O2'(hydroxyl)-O2'(hydroxyl)[3.09]_N3-N2(amino)[3.11]	N1-O2'(hydroxyl)[2.67]	(1,1)	3	6	3	3	1	0	0	0	1	cSS
2ygh.cif1	intra	0	70	A.A.24.	A.U.64.	A.A.85.	WC	20-XX	cWW	cW-W	X	A|U-A	HP	IP	JI	LR	LR	LR	GGGACUG	AAUUCCU	GAAAGAU				SAM-I RIBOSWITCH	SAM-I RIBOSWITCH	SAM-I RIBOSWITCH	thermoanaerobacter tengcongensis	thermoanaerobacter tengcongensis	thermoanaerobacter tengcongensis		N6(amino)-N3[3.23]_N1-O2'(hydroxyl)[2.82]	(1,1)	3	3	4	3	1	0	0	0	1		tWS
2ygh.cif1	intra	27	71	A.A.61.	A.G.22.	A.C.30.	WC	19-XIX	cWW	cW-W	X	A|G-C	IP	S	S	LC	LC	SM	GCCAAUU	AAGGGAC	GGCCCGA	abAB	1,2,3,-2,-1,-3	2	SAM-I RIBOSWITCH	SAM-I RIBOSWITCH	SAM-I RIBOSWITCH	thermoanaerobacter tengcongensis	thermoanaerobacter tengcongensis	thermoanaerobacter tengcongensis	N6(amino)*N2(amino)[3.30]	N6(amino)-O2(carbonyl)[3.01]_N1-O2'(hydroxyl)[2.67]	(2,2)	3	4	3	3	0	0	0	0	0		cWS
2ygh.cif1	intra	27	71	A.A.62.	A.G.23.	A.C.29.	WC	19-XIX	cWW	cW-W	X	A|G-C	IP	S	S	LC	LC	SM	CCAAUUC	AGGGACU	UGGCCCG	abAB	1,2,3,-2,-1,-3	2	SAM-I RIBOSWITCH	SAM-I RIBOSWITCH	SAM-I RIBOSWITCH	thermoanaerobacter tengcongensis	thermoanaerobacter tengcongensis	thermoanaerobacter tengcongensis	N6(amino)-O2'(hydroxyl)[2.89]_N6(amino)-N3[3.43]_N1-N2(amino)[3.13]		(2,2)	3	4	3	3	0	0	0	0	0	tWS
2z75.cif1	inter	0	72	B.A.58.	A.G.8.	B.U.33.	WB	28-XXVIII	cWW	cW-W	I	A|G-U	HPJC	S	S	LC	LC	SM	GACAUCG	CUGGACU	AGUUGAC				glmS ribozyme RNA	glmS ribozyme substrate RNA	glmS ribozyme RNA	caldanaerobacter subterraneus	caldanaerobacter subterraneus	caldanaerobacter subterraneus	N1-O2'(hydroxyl)[2.72]_N3-N2(amino)[3.25]		(1,1)	3	7	11	11	0	0	0	0	0	tSS
2z75.cif1	intra	0	73	B.A.93.	B.G.75.	B.C.89.	WC	19-XIX	cWW	cW-W	I	A|G-C	IP	S	S	LC	LC	SM	GUUAGAG	UGCGGUC	GACCGUU	abAB	1,2,-1,-2	1	glmS ribozyme RNA	glmS ribozyme RNA	glmS ribozyme RNA	caldanaerobacter subterraneus	caldanaerobacter subterraneus	caldanaerobacter subterraneus	N1-O2'(hydroxyl)[2.72]_N3-N2(amino)[3.00]	O2'(hydroxyl)-O2'(hydroxyl)[2.58]_O2'(hydroxyl)-O2(carbonyl)[2.66]	(1,1)	3	5	5	5	0	0	0	0	0	tSS
2z75.cif1	intra	28	74	B.A.104.	B.C.36.	B.G.53.	WC	19-XIX	cWW	cW-W	X	A|C-G	IC	S	S	LR	LR	SM	GGUAAAA	UGACGAG	AUCGAGA	abAB	1,2,3,-2,-1,-3	2	glmS ribozyme RNA	glmS ribozyme RNA	glmS ribozyme RNA	caldanaerobacter subterraneus	caldanaerobacter subterraneus	caldanaerobacter subterraneus		N1-N2(amino)[2.94]	(4,3)	4	6	3	3	1	0	0	0	1		tWS
2z75.cif1	intra	28	74	B.A.105.	B.C.36.	B.G.53.	WC	19-XIX	cWW	cW-W	X	A|C-G	IC	S	S	LR	LR	SM	GUAAAAC	UGACGAG	AUCGAGA	abAB	1,2,3,-2,-1,-3	2	glmS ribozyme RNA	glmS ribozyme RNA	glmS ribozyme RNA	caldanaerobacter subterraneus	caldanaerobacter subterraneus	caldanaerobacter subterraneus	O2'(hydroxyl)-O3'[2.89]_O2'(hydroxyl)-O2'(hydroxyl)[2.76]_N3-O2'(hydroxyl)[2.72]		(4,3)	4	6	3	3	1	0	0	0	1
2z75.cif1	inter	0	75	B.A.117.	A.C.10.	B.G.31.	WC	19-XIX	cWW	cW-W	I	A|C-G	HC	S	S	LR	LR	SM	GCGACUG	GGACUUA	UAAGUUG				glmS ribozyme RNA	glmS ribozyme substrate RNA	glmS ribozyme RNA	caldanaerobacter subterraneus	caldanaerobacter subterraneus	caldanaerobacter subterraneus	O2'(hydroxyl)-O2'(hydroxyl)[2.69]	N1-O2'(hydroxyl)[2.56]_N3-N2(amino)[3.17]	(1,1)	3	4	11	11	1	0	0	0	1		tWS
2z75.cif1	intra	28	74	B.A.127.	B.G.37.	B.C.52.	WC	19-XIX	cWW	cW-W	X	A|G-C	IC	S	S	LR	LR	SM	CAUAGAG	GACGAGG	UAUCGAG	abAB	1,2,3,-2,-1,-3	2	glmS ribozyme RNA	glmS ribozyme RNA	glmS ribozyme RNA	caldanaerobacter subterraneus	caldanaerobacter subterraneus	caldanaerobacter subterraneus	N1-N2(amino)[3.12]		(4,3)	4	7	3	3	0	0	0	0	0	tWS
2z75.cif1	intra	28	74	B.A.129.	B.A.38.	B.U.51.	WC	20-XX	cWW	cW-W	X	A|A-U	IC	S	S	LR	LR	SM	UAGAGCA	ACGAGGG	UUAUCGA	abAB	1,2,3,-2,-1,-3	2	glmS ribozyme RNA	glmS ribozyme RNA	glmS ribozyme RNA	caldanaerobacter subterraneus	caldanaerobacter subterraneus	caldanaerobacter subterraneus		O2'(hydroxyl)-O2'(hydroxyl)[3.51]	(4,3)	4	7	3	3	0	1	0	0	1
2zzn.cif1	intra	0	76	D.A.36.	D.C.32.	D.A.38.	-W	n/a	cWW	cW-W	X	A|C-A	HC	HC	HC	SM	SM	SM	UGCAGAU	GGACUGC	CAGAUCC				RNA (71-MER)	RNA (71-MER)	RNA (71-MER)	unspecified	unspecified	unspecified		O2'(hydroxyl)-O4'[3.31]	(1,1)	1	7	7	7	0	0	0	0	0
3bbm.cif1	inter	0	77	B.A.24.	A.C.4.	B.G.11.	WC	19-XIX	cWW	cW-W	X	A|C-G	IC	S	S	LR	LR	SM	GAAACAC	UCCCMGU	GAAGGGM				Loop A and Loop B Ribozyme strand	Loop A Substrate strand	Loop A and Loop B Ribozyme strand	unspecified	unspecified	unspecified		O2'(hydroxyl)-O3'[3.37]_O2'(hydroxyl)-O2'(hydroxyl)[2.73]_N3-O2'(hydroxyl)[2.71]	(1,1)	3	7	3	3	1	1	0	0	1
3bnr.cif1	inter	0	78	D.A.15.	C.C.9.	D.C.14.	NA	n/a	cWW	cW-W	X	A|C-C	IC	IC	IC	SM	SM	SM	AGCAAGU	UCACCMC	GAGCAAG				A site of human mitochondrial ribosome, chain three	A site of human mitochondrial ribosome, chain one	A site of human mitochondrial ribosome, chain three	unspecified	unspecified	unspecified		N7-O2'(hydroxyl)[2.66]	(1,1)	2	5	4	5	1	1	0	0	1
3cul.cif1	intra	0	79	C.A.54.	C.G.21.	C.C.50.	WC	19-XIX	cWW	cW-W	I	A|G-C	JC	S	S	LC	LC	SM	GUUAGGU	UCCGCAG	UGGCGUU				RNA (92-MER)	RNA (92-MER)	RNA (92-MER)	unspecified	unspecified	unspecified	N1-O2'(hydroxyl)[2.67]_N3-N2(amino)[3.24]	O3'-O2'(hydroxyl)[3.13]_O2'(hydroxyl)-O2'(hydroxyl)[2.42]_O2'(hydroxyl)-O2(carbonyl)[3.10]	(1,1)	3	3	3	3	0	0	0	0	0	t.S
3d0u.cif1	intra	0	80	A.A.48.	A.C.38.	A.G.51.	WC	19-XIX	cWW	cW-W	X	A|C-G	HP	HP	HP	SM	SM	SM	GGAAUCG	CAUCAGG	AUCGGGG				Lysine Riboswitch RNA	Lysine Riboswitch RNA	Lysine Riboswitch RNA	unspecified	unspecified	unspecified		O2'(hydroxyl)-O4'[3.40]_N1-N2(amino)[3.13]_N3-O2'(hydroxyl)[2.69]	(1,1)	2	5	5	5	1	0	0	0	1		cSS
3d0u.cif1	intra	0	81	A.A.78.	A.G.11.	A.C.75.	WC	19-XIX	cWW	cW-W	I	A|G-C	HP	S	S	LC	LC	SM	CCGAAGC	GGCGCGC	GCGCCGA	abAcBC	1,2,3,-2,-1,4,5,-3,-5,-4	1	Lysine Riboswitch RNA	Lysine Riboswitch RNA	Lysine Riboswitch RNA	unspecified	unspecified	unspecified	N1-O2'(hydroxyl)[2.93]_N3-N2(amino)[3.18]	O3'-O2'(hydroxyl)[3.10]_O2'(hydroxyl)-O2'(hydroxyl)[2.70]_O2'(hydroxyl)-O2(carbonyl)[2.48]	(1,1)	3	3	6	6	0	0	0	0	0	tSS
3d0u.cif1	intra	0	82	A.A.124.	A.A.20.	A.G.66.	IM	08-VIII	cWW	cW-W	X	A|A-G	HC	IC	HPIC	LR	LR	SM	GGAAUAC	GAGAUGA	AAGGCGA				Lysine Riboswitch RNA	Lysine Riboswitch RNA	Lysine Riboswitch RNA	unspecified	unspecified	unspecified		N6(amino)-N3[3.51]_N1-N2(amino)[2.98]	(1,1)	3	5	10	9	1	1	0	0	1		tWS
3d2v.cif1	intra	29	83	A.A.29.	A.G.10.	A.C.36.	WC	19-XIX	cWW	cW-W	II	A|G-C	IC	S	S	LC	LC	SM	CUGAGAA	AGGGGUG	AGUCCCU				TPP-specific riboswitch	TPP-specific riboswitch	TPP-specific riboswitch	arabidopsis thaliana	arabidopsis thaliana	arabidopsis thaliana		O2'(hydroxyl)-O2'(hydroxyl)[2.73]_N3-O2'(hydroxyl)[2.66]	(3,3)	5	9	4	4	1	0	0	0	1		cSS
3d2v.cif1	intra	30	84	A.A.31.	A.G.13.	A.C.26.	WC	19-XIX	cWW	cW-W	X	A|G-C	IC	S	S	LC	LC	SM	GAGAAAG	GGUGCUU	AGGCUGA				TPP-specific riboswitch	TPP-specific riboswitch	TPP-specific riboswitch	arabidopsis thaliana	arabidopsis thaliana	arabidopsis thaliana	O2'(hydroxyl)-N7[3.20]_O2'(hydroxyl)-O6(carbonyl)[2.73]		(3,2)	4	9	5	5	1	0	0	0	1
3d2v.cif1	intra	29	83	A.A.44.	A.G.9.	A.C.37.	WC	19-XIX	cWW	cW-W	I	A|G-C	JC	S	S	LC	LC	SM	UGAACCU	CAGGGGU	GUCCCUU				TPP-specific riboswitch	TPP-specific riboswitch	TPP-specific riboswitch	arabidopsis thaliana	arabidopsis thaliana	arabidopsis thaliana	N1-O2'(hydroxyl)[2.84]_N3-N2(amino)[2.95]	O2'(hydroxyl)-O2'(hydroxyl)[2.81]_O2'(hydroxyl)-O2(carbonyl)[3.04]	(3,3)	5	5	4	4	0	0	0	0	0	tSS		Multi Loop	Stem
3d2v.cif1	intra	30	84	A.A.57.	A.C.14.	A.G.25.	WC	19-XIX	cWW	cW-W	X	A|C-G	HC	S	S	LR	LR	SM	GGUAAUG	GUGCUUG	CAGGCUG				TPP-specific riboswitch	TPP-specific riboswitch	TPP-specific riboswitch	arabidopsis thaliana	arabidopsis thaliana	arabidopsis thaliana		N1-N2(amino)[3.37]	(3,2)	4	6	5	5	1	0	0	0	1
3d2v.cif1	intra	30	84	A.A.58.	A.C.14.	A.G.25.	WC	19-XIX	cWW	cW-W	II	A|C-G	HC	S	S	LR	LR	SM	GUAAUGC	GUGCUUG	CAGGCUG				TPP-specific riboswitch	TPP-specific riboswitch	TPP-specific riboswitch	arabidopsis thaliana	arabidopsis thaliana	arabidopsis thaliana	O2'(hydroxyl)-O3'[3.08]_O2'(hydroxyl)-O2'(hydroxyl)[2.65]_N3-O2'(hydroxyl)[2.79]		(3,2)	4	6	5	5	1	0	0	0	1
3d2v.cif1	intra	29	83	A.A.72.	A.G.8.	A.C.38.	WC	19-XIX	cWW	cW-W	I	A|G-C	JC	S	S	LC	LC	SM	GGGAGUG	CCAGGGG	UCCCUUU				TPP-specific riboswitch	TPP-specific riboswitch	TPP-specific riboswitch	arabidopsis thaliana	arabidopsis thaliana	arabidopsis thaliana	O2'(hydroxyl)-O2'(hydroxyl)[2.68]_N3-N2(amino)[3.16]	N1-O2'(hydroxyl)[2.68]	(3,3)	5	4	4	4	1	0	0	0	1	cSS	tWS	Multi Loop	Stem
3dil.cif1	intra	0	85	A.A.51.	A.C.41.	A.G.54.	WC	19-XIX	cWW	cW-W	X	A|C-G	HP	HP	HP	SM	SM	SM	GGAAUCG	CAUCAGG	AUCGGGG				RNA (174-MER)	RNA (174-MER)	RNA (174-MER)	unspecified	unspecified	unspecified		O2'(hydroxyl)-O4'[3.20]_N1-N2(amino)[3.23]_N3-O2'(hydroxyl)[2.67]	(1,1)	2	5	5	5	1	0	0	0	1		cSS
3dil.cif1	intra	0	86	A.A.81.	A.G.14.	A.C.78.	WC	19-XIX	cWW	cW-W	I	A|G-C	HP	S	S	LC	LC	SM	CCGAAGG	GGCGCGC	GCGCCGA	abAcBC	1,2,3,-2,-1,4,5,-3,-5,-4	1	RNA (174-MER)	RNA (174-MER)	RNA (174-MER)	unspecified	unspecified	unspecified	N1-O2'(hydroxyl)[2.79]_N3-N2(amino)[3.02]	O2'(hydroxyl)-O2'(hydroxyl)[2.75]_O2'(hydroxyl)-O2(carbonyl)[2.77]	(1,1)	3	3	6	6	0	0	0	0	0	tSS
3dil.cif1	intra	31	87	A.A.126.	A.U.24.	A.G.69.	NA	n/a	cWW	cW-W	X	A|U-G	HC	IC	HPIC	LR	LR	SM	GGGAAUA	AGAUGAG	AAGGCGA				RNA (174-MER)	RNA (174-MER)	RNA (174-MER)	unspecified	unspecified	unspecified	N6(amino)-O2(carbonyl)[2.95]_N1-O2'(hydroxyl)[2.77]		(3,2)	3	5	10	9	1	1	0	0	1	cWS
3dil.cif1	intra	31	87	A.A.127.	A.A.23.	A.G.69.	IM	08-VIII	cWW	cW-W	X	A|A-G	HC	IC	HPIC	LR	LR	SM	GGAAUAC	GAGAUGA	AAGGCGA				RNA (174-MER)	RNA (174-MER)	RNA (174-MER)	unspecified	unspecified	unspecified		N6(amino)-N3[3.19]_N1-N2(amino)[3.04]	(3,2)	3	5	10	9	1	1	0	0	1		tWS
3dil.cif1	intra	31	87	A.A.127.	A.U.24.	A.G.69.	NA	n/a	cWW	cW-W	X	A|U-G	HC	IC	HPIC	LR	LR	SM	GGAAUAC	AGAUGAG	AAGGCGA				RNA (174-MER)	RNA (174-MER)	RNA (174-MER)	unspecified	unspecified	unspecified		N6(amino)-N3[3.19]_N1-N2(amino)[3.04]	(3,2)	3	5	10	9	1	1	0	0	1		tWS
3dil.cif1	intra	31	87	A.A.129.	A.U.24.	A.G.69.	NA	n/a	cWW	cW-W	X	A|U-G	HC	IC	HPIC	LR	LR	SM	AAUACCC	AGAUGAG	AAGGCGA				RNA (174-MER)	RNA (174-MER)	RNA (174-MER)	unspecified	unspecified	unspecified		N1-O2'(hydroxyl)[2.75]	(3,2)	3	5	10	9	0	1	0	0	1
3e5c.cif1	intra	32	88	A.A.38.	A.C.6.	A.G.48.	WC	19-XIX	cWW	cW-W	X	A|C-G	JC	S	S	LC	LC	SM	UGUAACC	UCCCGAA	AGGGGGA				SMK box (SAM-III) Riboswitch	SMK box (SAM-III) Riboswitch	SMK box (SAM-III) Riboswitch	unspecified	unspecified	unspecified		N6(amino)-N3[3.30]_N1-N2(amino)[2.81]	(2,1)	3	4	6	6	1	0	1	0	1		tWS
3e5c.cif1	intra	32	88	A.A.39.	A.C.6.	A.G.48.	WC	19-XIX	cWW	cW-W	X	A|C-G	JC	S	S	LC	LC	SM	GUAACCG	UCCCGAA	AGGGGGA				SMK box (SAM-III) Riboswitch	SMK box (SAM-III) Riboswitch	SMK box (SAM-III) Riboswitch	unspecified	unspecified	unspecified		N1-O2'(hydroxyl)[2.75]	(2,1)	3	4	6	6	1	0	1	0	1
3f2q.cif1	intra	0	89	X.A.63.	X.G.41.	X.C.82.	WC	19-XIX	cWW	cW-W	I	A|G-C	JP	S	S	LC	LC	SM	UUGAUUU	AUAGUCC	AAACCGA	abAB	1,2,-1,-2	2	FMN riboswitch	FMN riboswitch	FMN riboswitch	unspecified	unspecified	unspecified	N1-O2'(hydroxyl)[2.75]_N3-N2(amino)[2.94]	O2'(hydroxyl)-O2'(hydroxyl)[2.96]_O2'(hydroxyl)-O2(carbonyl)[3.06]	(1,1)	3	3	2	2	0	0	0	0	0	tSS
3f2q.cif1	intra	0	90	X.A.104.	X.G.33.	X.C.46.	WC	19-XIX	cWW	cW-W	I	A|G-C	JI	S	S	LR	LR	SM	GAGAGAA	CCGGUGG	CCACGAA	abAB	1,2,-1,-2	1	FMN riboswitch	FMN riboswitch	FMN riboswitch	unspecified	unspecified	unspecified	N1-O2'(hydroxyl)[2.98]_N3-N2(amino)[2.90]	O2'(hydroxyl)-O2'(hydroxyl)[2.75]_O2'(hydroxyl)-O2(carbonyl)[2.94]	(1,1)	3	7	4	4	1	0	0	0	1	tSS		Multi Loop	Multi Loop
3g9c.cif1	intra	33	91	Q.A.86.	Q.G.67.	Q.C.83.	WC	19-XIX	cWW	cW-W	II	A|G-C	IP	S	S	LC	LC	SM	CGCAAGC	CCCGGUU	AACCGCA	abAB	1,2,-1,-2	1	GLMS RIBOZYME	GLMS RIBOZYME	GLMS RIBOZYME	syntetic construct	syntetic construct	syntetic construct		O2'(hydroxyl)-O2'(hydroxyl)[2.81]_N3-O2'(hydroxyl)[3.30]	(2,2)	3	3	6	6	1	0	0	0	1
3g9c.cif1	intra	33	91	Q.A.87.	Q.G.68.	Q.C.82.	WC	19-XIX	cWW	cW-W	I	A|G-C	IP	S	S	LC	LC	SM	GCAAGCU	CCGGUUG	CAACCGC	abAB	1,2,-1,-2	1	GLMS RIBOZYME	GLMS RIBOZYME	GLMS RIBOZYME	syntetic construct	syntetic construct	syntetic construct	N1-O2'(hydroxyl)[2.89]_N3-N2(amino)[3.00]	O2'(hydroxyl)-O2'(hydroxyl)[2.88]_O2'(hydroxyl)-O2(carbonyl)[2.88]	(2,2)	3	3	6	6	1	0	0	0	1	tSS
3g9c.cif1	intra	34	92	Q.A.98.	Q.C.29.	Q.G.45.	WC	19-XIX	cWW	cW-W	X	A|C-G	IC	S	S	LR	LR	SM	CUUAAAU	UGACGAG	AUCGAGA	abAB	1,2,3,-2,-1,-3	2	GLMS RIBOZYME	GLMS RIBOZYME	GLMS RIBOZYME	syntetic construct	syntetic construct	syntetic construct		N1-N2(amino)[2.85]	(5,3)	4	5	3	3	0	0	0	0	0		tWS
3g9c.cif1	intra	34	92	Q.A.99.	Q.C.29.	Q.G.45.	WC	19-XIX	cWW	cW-W	II	A|C-G	IC	S	S	LR	LR	SM	UUAAAUC	UGACGAG	AUCGAGA	abAB	1,2,3,-2,-1,-3	2	GLMS RIBOZYME	GLMS RIBOZYME	GLMS RIBOZYME	syntetic construct	syntetic construct	syntetic construct	O2'(hydroxyl)-O3'[2.83]_O2'(hydroxyl)-O2'(hydroxyl)[2.90]_N3-O2'(hydroxyl)[2.65]		(5,3)	4	5	3	3	0	0	0	0	0
3g9c.cif1	inter	0	93	Q.A.112.	F.C.10.	Q.G.24.	WC	19-XIX	cWW	cW-W	I	A|C-G	HC	S	S	LR	LR	SM	GUGACUU	GAACUNN	CCAGUUG				GLMS RIBOZYME	RNA (5'-R(*GP*CP*GP*CP*CP*AP*GP*AP*AP*CP*U)-3')	GLMS RIBOZYME	syntetic construct	syntetic construct	syntetic construct	O2'(hydroxyl)-O2'(hydroxyl)[2.69]	N1-O2'(hydroxyl)[2.61]_N3-N2(amino)[3.03]	(1,1)	3	4	4	4	1	0	1	0	1		tSS
3g9c.cif1	intra	34	92	Q.A.123.	Q.G.30.	Q.C.44.	WC	19-XIX	cWW	cW-W	X	A|G-C	IC	S	S	LR	LR	SM	GACAAAG	GACGAGG	UAUCGAG	abAB	1,2,3,-2,-1,-3	2	GLMS RIBOZYME	GLMS RIBOZYME	GLMS RIBOZYME	syntetic construct	syntetic construct	syntetic construct	N1-N2(amino)[2.86]		(5,3)	4	6	3	3	0	0	0	0	0	tWS
3g9c.cif1	intra	34	92	Q.A.124.	Q.G.30.	Q.C.44.	WC	19-XIX	cWW	cW-W	II	A|G-C	IC	S	S	LR	LR	SM	ACAAAGG	GACGAGG	UAUCGAG	abAB	1,2,3,-2,-1,-3	2	GLMS RIBOZYME	GLMS RIBOZYME	GLMS RIBOZYME	syntetic construct	syntetic construct	syntetic construct		O2'(hydroxyl)-O3'[3.06]_O2'(hydroxyl)-O2'(hydroxyl)[2.64]_N3-O2'(hydroxyl)[2.91]	(5,3)	4	6	3	3	0	0	0	0	0
3g9c.cif1	intra	34	92	Q.A.125.	Q.A.31.	Q.U.43.	WC	20-XX	cWW	cW-W	I	A|A-U	IC	S	S	LR	LR	SM	CAAAGGU	ACGAGGU	UUAUCGA	abAB	1,2,3,-2,-1,-3	2	GLMS RIBOZYME	GLMS RIBOZYME	GLMS RIBOZYME	syntetic construct	syntetic construct	syntetic construct	N1-O2'(hydroxyl)[3.03]		(5,3)	4	6	3	3	0	0	0	0	0
3gs5.cif1	inter	0	94	C.A.36.	A.C.4.	A.G.23.	WC	19-XIX	cWW	cW-W	II	A|C-G	IC	S	S	LR	LR	SM	GAAACAC	UCCCAGU	GAAGGGN				RNA (36-MER)	RNA (25-MER)	RNA (25-MER)	unspecified	unspecified	unspecified		O2'(hydroxyl)-O2'(hydroxyl)[2.72]_N3-O2'(hydroxyl)[2.83]	(1,1)	3	7	3	3	1	1	0	0	1
3hax.cif1	intra	0	95	E.A.58.	E.G.2.	E.C.56.	WC	19-XIX	cWW	cW-W	X	A|G-C	HP	S	S	LC	LC	SM	CCCACAG	NNGGGUC	GACCCAC	abAB	1,2,3,-1,-3,-2	1	H/ACA RNA	H/ACA RNA	H/ACA RNA	unspecified	unspecified	unspecified		N7-O2'(hydroxyl)[2.69]_N6(amino)-O2(carbonyl)[3.07]	(1,1)	3	6	9	9	0	0	0	0	0		cHS
3hhn.cif1	intra	0	96	E.A.3.	E.G.46.	E.C.113.	WC	19-XIX	cWW	cW-W	I	A|G-C	HP	IP	IP	LR	LR	LR	AGGAACA	AGGGCUU	CAACAAU				Class I ligase ribozyme, self-ligation product	Class I ligase ribozyme, self-ligation product	Class I ligase ribozyme, self-ligation product	unspecified	unspecified	unspecified	O2'(hydroxyl)-N3[2.76]_N3-N2(amino)[3.19]	N1-O2'(hydroxyl)[2.65]	(1,1)	3	3	8	2	1	1	0	0	1	cSS
3hhn.cif1	intra	0	97	E.A.22.	E.C.-6.	E.G.18.	WC	19-XIX	cWW	cW-W	I	A|C-G	IP	S	S	LC	LC	SM	AUAAUCA	NNUCCAG	CUGGAUA	abAB	1,2,-1,-2	1	Class I ligase ribozyme, self-ligation product	Class I ligase ribozyme, self-ligation product	Class I ligase ribozyme, self-ligation product	unspecified	unspecified	unspecified	N1-O2'(hydroxyl)[3.26]	O2'(hydroxyl)-O2'(hydroxyl)[2.56]_O2'(hydroxyl)-N3[3.00]_N3-N2(amino)[3.20]	(1,1)	3	15	8	8	0	1	0	0	1		cSS	Exterior Loop	Stem
3hhn.cif1	intra	0	98	E.A.26.	E.G.-3.	E.C.15.	WC	19-XIX	cWW	cW-W	X	A|G-C	IP	S	S	LC	LC	SM	UCAAAGA	CCAGUAG	CUACUGG	abAB	1,2,-1,-2	1	Class I ligase ribozyme, self-ligation product	Class I ligase ribozyme, self-ligation product	Class I ligase ribozyme, self-ligation product	unspecified	unspecified	unspecified	N6(amino)-N3[3.17]_N1-N2(amino)[3.15]		(1,1)	3	15	8	8	0	0	0	0	0	tWS
3hhn.cif1	intra	35	99	E.A.29.	E.G.72.	E.C.85.	WC	19-XIX	cWW	cW-W	I	A|G-C	IP	S	S	LR	LR	SM	AAGACAA	GCAGAGG	CCUCCGG	abAB	1,2,3,-1,-3,-2	3	Class I ligase ribozyme, self-ligation product	Class I ligase ribozyme, self-ligation product	Class I ligase ribozyme, self-ligation product	unspecified	unspecified	unspecified	N1-O2'(hydroxyl)[2.64]_N3-N2(amino)[3.47]		(4,4)	6	15	4	4	0	0	0	0	0	tSS
3hhn.cif1	intra	35	99	E.A.31.	E.A.73.	E.U.84.	WC	20-XX	cWW	cW-W	X	A|A-U	IP	S	S	LR	LR	SM	GACAAAU	CAGAGGU	GCCUCCG	abAB	1,2,3,-1,-3,-2	3	Class I ligase ribozyme, self-ligation product	Class I ligase ribozyme, self-ligation product	Class I ligase ribozyme, self-ligation product	unspecified	unspecified	unspecified		N6(amino)-O2(carbonyl)[3.01]_N1-O2'(hydroxyl)[2.73]	(4,4)	6	15	4	4	0	0	0	0	0		cWS
3hhn.cif1	intra	35	99	E.A.32.	E.G.74.	E.C.83.	WC	19-XIX	cWW	cW-W	X	A|G-C	IP	S	S	LR	LR	SM	ACAAAUC	AGAGGUG	AGCCUCC	abAB	1,2,3,-1,-3,-2	3	Class I ligase ribozyme, self-ligation product	Class I ligase ribozyme, self-ligation product	Class I ligase ribozyme, self-ligation product	unspecified	unspecified	unspecified	N6(amino)-N3[3.41]_N1-N2(amino)[3.40]		(4,4)	6	15	4	4	0	0	0	0	0	tWS
3hhn.cif1	intra	35	99	E.A.71.	E.C.86.	E.G.105.	WC	19-XIX	cWW	cW-W	I	A|C-G	IPJC	S	S	LC	LC	SM	UGCAGAG	CUCCGGU	AACGUUC				Class I ligase ribozyme, self-ligation product	Class I ligase ribozyme, self-ligation product	Class I ligase ribozyme, self-ligation product	unspecified	unspecified	unspecified	N1-O2'(hydroxyl)[2.68]		(4,4)	6	2	2	2	0	0	0	0	0
3hjw.cif1	intra	0	100	D.A.55.	D.G.2.	D.C.53.	WC	19-XIX	cWW	cW-W	X	A|G-C	HP	S	S	LC	LC	SM	CCCACAA	NNGGGCC	GGCCCAC	abAB	1,2,3,-1,-3,-2	1	RNA (58-MER)	RNA (58-MER)	RNA (58-MER)	unspecified	unspecified	unspecified		N7-O2'(hydroxyl)[2.54]_N6(amino)-O2(carbonyl)[3.47]	(1,1)	3	4	9	9	0	0	0	0	0		cHS
3ivn.cif1	intra	0	101	A.A.14.	A.G.37.	A.C.44.	WC	19-XIX	cWW	cW-W	X	A|G-C	II	HP	HP	LR	LR	SM	UAUAACC	AGGGUGU	CUACCAG				A-riboswitch	A-riboswitch	A-riboswitch	bacillus subtilis	bacillus subtilis	bacillus subtilis	N6(amino)-O2'(hydroxyl)[3.30]_N6(amino)-N3[2.72]_N1-N2(amino)[2.76]		(1,1)	2	3	8	8	0	0	1	0	1	tWS
3ivn.cif1	intra	36	102	A.A.24.	A.G.28.	A.C.52.	WC	19-XIX	cWW	cW-W	II	A|G-C	HP	S	S	LC	LC	SM	AUGAUAU	UAUGGUU	AACCGUA	abAcBC	1,2,-1,3,-2,-3	2	A-riboswitch	A-riboswitch	A-riboswitch	bacillus subtilis	bacillus subtilis	bacillus subtilis	O2'(hydroxyl)-O2'(hydroxyl)[3.09]_N3-O2'(hydroxyl)[2.72]		(3,2)	4	6	2	2	0	0	0	0	0
3ivn.cif1	intra	36	102	A.A.56.	A.G.28.	A.C.52.	WC	19-XIX	cWW	cW-W	X	A|G-C	HP	S	S	LC	LC	SM	GUAAAAU	UAUGGUU	AACCGUA	abAcBC	1,2,-1,3,-2,-3	2	A-riboswitch	A-riboswitch	A-riboswitch	bacillus subtilis	bacillus subtilis	bacillus subtilis	N6(amino)*N2(amino)[3.40]	N1-O2'(hydroxyl)[3.24]	(3,2)	4	6	2	2	1	0	0	0	1	tH.	cWS
3ivn.cif1	intra	36	102	A.A.57.	A.G.29.	A.C.51.	WC	19-XIX	cWW	cW-W	X	A|G-C	HP	S	S	LC	LC	SM	UAAAAUC	AUGGUUU	GAACCGU	abAcBC	1,2,-1,3,-2,-3	2	A-riboswitch	A-riboswitch	A-riboswitch	bacillus subtilis	bacillus subtilis	bacillus subtilis	N1-N2(amino)[3.58]		(3,2)	4	6	2	2	0	0	0	0	0	tWS
3jcs.cif1	inter	37	103	2.A.980.	3.G.22.	3.G.209.	NA	n/a	cWW	cW-W	X	A|G-G	JC	JC	JC	LR	LR	SM	ACCAACG	CUUGCCA	UGGGGUG				26S delta ribosomal RNA	26S gamma ribosomal RNA	26S gamma ribosomal RNA	leishmania donovani	leishmania donovani	leishmania donovani	N1-N2(amino)[3.46]		(1,2)	5	39	10	5	0	1	0	0	1	cWW	tHS
3jcs.cif1	inter	37	103	2.A.980.	3.C.23.	3.G.208.	WC	19-XIX	cWW	cW-W	X	A|C-G	JC	S	S	LR	LR	SM	ACCAACG	UUGCCAG	CUGGGGU				26S delta ribosomal RNA	26S gamma ribosomal RNA	26S gamma ribosomal RNA	leishmania donovani	leishmania donovani	leishmania donovani	N6(amino)-O2(carbonyl)[2.99]		(1,2)	5	39	6	6	0	1	0	0	1	cWS
3jcs.cif1	intra	38	104	3.A.8.	3.C.102.	3.G.132.	WC	19-XIX	cWW	cW-W	II	A|C-G	HC	S	S	LR	LR	SM	GGUAAUG	GGCCUUU	GGGGGCU				26S gamma ribosomal RNA	26S gamma ribosomal RNA	26S gamma ribosomal RNA	leishmania donovani	leishmania donovani	leishmania donovani	O2'(hydroxyl)-O3'[3.23]_N3-O2'(hydroxyl)[2.64]		(2,2)	3	4	10	10	1	0	0	0	1	cSS	tWW
3jcs.cif1	intra	38	104	3.A.9.	3.C.101.	3.G.133.	WC	19-XIX	cWW	cW-W	I	A|C-G	HC	S	S	LR	LR	SM	GUAAUGC	GGGCCUU	GGGGCUC				26S gamma ribosomal RNA	26S gamma ribosomal RNA	26S gamma ribosomal RNA	leishmania donovani	leishmania donovani	leishmania donovani	O2'(hydroxyl)-O2'(hydroxyl)[2.91]_O2'(hydroxyl)-O2(carbonyl)[3.12]	N1-O2'(hydroxyl)[2.52]_N3-N2(amino)[2.95]	(2,2)	3	4	10	10	1	0	0	0	1		tSS
3jcs.cif1	inter	39	105	3.A.69.	1.C.1748.	1.G.1768.	WC	19-XIX	cWW	cW-W	II	A|C-G	JC	S	S	LR	LR	SM	CAUAAUC	AACCUGG	AAAGAAA				26S gamma ribosomal RNA	26S alpha ribosomal RNA	26S alpha ribosomal RNA	leishmania donovani	leishmania donovani	leishmania donovani	O2'(hydroxyl)-O3'[3.06]_O2'(hydroxyl)-O2'(hydroxyl)[3.11]_N3-O2'(hydroxyl)[2.36]	N1-N2(amino)[3.39]	(2,2)	5	4	2	2	0	0	0	0	0	cSS	tW.
3jcs.cif1	inter	39	105	3.A.70.	1.C.1747.	1.A.1769.	NA	n/a	cWW	cW-W	X	A|C-A	JC	JP	JP	LR	LR	SM	AUAAUCC	GAACCUG	AAGAAAU				26S gamma ribosomal RNA	26S alpha ribosomal RNA	26S alpha ribosomal RNA	leishmania donovani	leishmania donovani	leishmania donovani		N6(amino)-O2'(hydroxyl)[3.25]_N1-O2'(hydroxyl)[2.24]	(2,2)	5	4	10	1	0	0	0	0	0
3jcs.cif1	inter	40	106	3.A.199.	1.C.1640.	1.G.1742.	WC	19-XIX	cWW	cW-W	X	A|C-G	IC	JP	JP	LR	LR	SM	AGCAAAA	AAACUGA	ACAGAGA				26S gamma ribosomal RNA	26S alpha ribosomal RNA	26S alpha ribosomal RNA	leishmania donovani	leishmania donovani	leishmania donovani		N6(amino)-O2'(hydroxyl)[2.77]	(3,1)	3	21	7	10	1	1	0	0	1
3jcs.cif1	inter	40	106	3.A.200.	1.C.1640.	1.G.1742.	WC	19-XIX	cWW	cW-W	X	A|C-G	IC	JP	JP	LR	LR	SM	GCAAAAA	AAACUGA	ACAGAGA				26S gamma ribosomal RNA	26S alpha ribosomal RNA	26S alpha ribosomal RNA	leishmania donovani	leishmania donovani	leishmania donovani		N1-N2(amino)[3.17]	(3,1)	3	21	7	10	1	0	0	0	1		tWS
3jcs.cif1	inter	40	106	3.A.201.	1.C.1640.	1.G.1742.	WC	19-XIX	cWW	cW-W	II	A|C-G	IC	JP	JP	LR	LR	SM	CAAAAAC	AAACUGA	ACAGAGA				26S gamma ribosomal RNA	26S alpha ribosomal RNA	26S alpha ribosomal RNA	leishmania donovani	leishmania donovani	leishmania donovani	O2'(hydroxyl)-O2'(hydroxyl)[2.82]_N3-O2'(hydroxyl)[2.94]		(3,1)	3	21	7	10	0	0	0	0	0
3jcs.cif1	inter	0	107	5.A.2.	4.G.25.	4.C.180.	WC	19-XIX	cWW	cW-W	X	A|G-C	JC	S	S	LC	LC	SM	NNUACGU	GCAGGUA	UGCCCAC				26S epsilon ribosomal RNA	26S delta ribosomal RNA	26S delta ribosomal RNA	leishmania donovani	leishmania donovani	leishmania donovani		N3-O2'(hydroxyl)[2.57]	(1,1)	3	3	6	6	0	0	0	1	1	tWW	cWS
3jcs.cif1	inter	0	108	5.A.16.	2.A.635.	2.U.1429.	WC	20-XX	cWW	cW-W	X	A|A-U	HC	S	S	LR	LR	SM	CAAACGA	GCUAAGC	ACUUAGC	abAcBC	1,2,3,-2,-1,4,5,6,7,8,9,10,11,12,13,14,15,-3,-15,-14,-13,-12,-11,-10,-9,-8,-7,-6,-5,-4	8	26S epsilon ribosomal RNA	26S delta ribosomal RNA	26S delta ribosomal RNA	leishmania donovani	leishmania donovani	leishmania donovani	N6(amino)-N3[2.93]_N1-O2'(hydroxyl)[2.94]		(1,1)	3	7	7	7	0	0	0	0	0	cWS
3jcs.cif1	inter	0	109	6.A.54.	1.C.490.	1.G.645.	WC	19-XIX	cWW	cW-W	X	A|C-G	NA	IC	IC	NA	NA	SM	AGUAUAU	GGCCAGA	UUGGCGA				26S zeta ribosomal RNA	26S alpha ribosomal RNA	26S alpha ribosomal RNA	leishmania donovani	leishmania donovani	leishmania donovani	N6(amino)-O2(carbonyl)[2.61]_N1*O2(carbonyl)[2.60]		(1,1)	2		30	113	0	1	0	0	1	cWS
3k1v.cif1	intra	41	110	A.A.23.	A.G.2.	A.C.21.	WC	19-XIX	cWW	cW-W	X	A|G-C	HP	S	S	LC	LC	SM	UCUAUAA	NNAGAGG	CCUCUAU	abAB	1,2,-1,-2	1	PreQ1 riboswitch	PreQ1 riboswitch	PreQ1 riboswitch	unspecified	unspecified	unspecified	N6(amino)-N3[3.11]_N1-O2'(hydroxyl)[2.88]		(7,5)	4	8	5	5	0	0	0	0	0	tWS
3k1v.cif1	intra	41	110	A.A.25.	A.G.2.	A.C.21.	WC	19-XIX	cWW	cW-W	X	A|G-C	HP	S	S	LC	LC	SM	UAUAAAA	NNAGAGG	CCUCUAU	abAB	1,2,-1,-2	1	PreQ1 riboswitch	PreQ1 riboswitch	PreQ1 riboswitch	unspecified	unspecified	unspecified		N6(amino)-O2(carbonyl)[2.74]_N1-O2'(hydroxyl)[2.58]	(7,5)	4	8	5	5	0	0	0	0	0		cWS
3k1v.cif1	intra	41	110	A.A.25.	A.A.3.	A.U.20.	WC	20-XX	cWW	cW-W	X	A|A-U	HP	S	S	LC	LC	SM	UAUAAAA	NAGAGGU	CCCUCUA	abAB	1,2,-1,-2	1	PreQ1 riboswitch	PreQ1 riboswitch	PreQ1 riboswitch	unspecified	unspecified	unspecified	N7-O2'(hydroxyl)[3.19]_N6(amino)-N3[2.87]		(7,5)	4	8	5	5	0	0	0	0	0	tHS
3k1v.cif1	intra	41	110	A.A.26.	A.A.3.	A.U.20.	WC	20-XX	cWW	cW-W	X	A|A-U	HP	S	S	LC	LC	SM	AUAAAAA	NAGAGGU	CCCUCUA	abAB	1,2,-1,-2	1	PreQ1 riboswitch	PreQ1 riboswitch	PreQ1 riboswitch	unspecified	unspecified	unspecified		N6(amino)-O2(carbonyl)[2.67]_N1-O2'(hydroxyl)[3.10]	(7,5)	4	8	5	5	0	0	0	0	0		cWS
3k1v.cif1	intra	41	110	A.A.27.	A.G.4.	A.C.19.	WC	19-XIX	cWW	cW-W	X	A|G-C	HP	S	S	LC	LC	SM	UAAAAAA	AGAGGUU	UCCCUCU	abAB	1,2,-1,-2	1	PreQ1 riboswitch	PreQ1 riboswitch	PreQ1 riboswitch	unspecified	unspecified	unspecified	N6(amino)*N2(amino)[3.24]	N6(amino)-O2(carbonyl)[2.89]_N1-O2'(hydroxyl)[2.74]	(7,5)	4	8	5	5	0	0	0	0	0	cH.	cWS
3k1v.cif1	intra	41	110	A.A.28.	A.G.5.	A.C.18.	WC	19-XIX	cWW	cW-W	X	A|G-C	HP	S	S	LC	LC	SM	AAAAAAC	GAGGUUC	AUCCCUC	abAB	1,2,-1,-2	1	PreQ1 riboswitch	PreQ1 riboswitch	PreQ1 riboswitch	unspecified	unspecified	unspecified	N6(amino)-O2'(hydroxyl)[2.86]_N6(amino)-N3[3.10]_N1-N2(amino)[2.97]		(7,5)	4	8	5	5	0	0	0	0	0	tWS
3k1v.cif1	intra	41	110	A.A.29.	A.G.5.	A.C.18.	WC	19-XIX	cWW	cW-W	X	A|G-C	HP	S	S	LC	LC	SM	AAAAACU	GAGGUUC	AUCCCUC	abAB	1,2,-1,-2	1	PreQ1 riboswitch	PreQ1 riboswitch	PreQ1 riboswitch	unspecified	unspecified	unspecified		N6(amino)-O2(carbonyl)[2.99]_N1-O2'(hydroxyl)[2.80]	(7,5)	4	8	5	5	0	0	0	0	0		cWS
3k1v.cif1	intra	41	110	A.A.30.	A.C.17.	A.PRF.301.	WC	19-XIX	.WW	.W-W	X	A|C-g	HP	HP	NA	SM	NA	NA	AAAACUA	CAUCCCU	NNNAGAG				PreQ1 riboswitch	PreQ1 riboswitch	PreQ1 riboswitch	unspecified	unspecified	unspecified		N6(amino)-N3[2.94]_N1-N2(amino)[2.87]	(7,5)	4	8	6	5	0	1	0	0	1		..S
3la5.cif1	intra	0	111	A.A.23.	A.G.46.	A.C.53.	WC	19-XIX	cWW	cW-W	X	A|G-C	II	HP	HP	LR	LR	SM	UAUAAUC	GGAGCUU	CCACCAA				Adenosine RIboswitch	Adenosine RIboswitch	Adenosine RIboswitch	bacillus subtilis	bacillus subtilis	bacillus subtilis	N6(amino)-O2'(hydroxyl)[3.12]_N6(amino)-N3[3.15]_N1-N2(amino)[2.99]		(1,1)	2	3	8	8	0	0	0	0	0	tWS
3la5.cif1	intra	42	112	A.A.33.	A.G.37.	A.C.61.	WC	19-XIX	cWW	cW-W	II	A|G-C	HP	S	S	LC	LC	SM	AUGAUAU	UAUGGUU	AGCCUUA	abAcBC	1,2,-1,3,-2,-3	2	Adenosine RIboswitch	Adenosine RIboswitch	Adenosine RIboswitch	bacillus subtilis	bacillus subtilis	bacillus subtilis	O2'(hydroxyl)-O2'(hydroxyl)[2.69]_N3-O2'(hydroxyl)[2.71]		(3,2)	4	6	2	2	0	0	0	0	0
3la5.cif1	intra	42	112	A.A.65.	A.G.37.	A.C.61.	WC	19-XIX	cWW	cW-W	X	A|G-C	HP	S	S	LC	LC	SM	UUAAACU	UAUGGUU	AGCCUUA	abAcBC	1,2,-1,3,-2,-3	2	Adenosine RIboswitch	Adenosine RIboswitch	Adenosine RIboswitch	bacillus subtilis	bacillus subtilis	bacillus subtilis	N6(amino)*N2(amino)[3.36]	N6(amino)-O2(carbonyl)[3.09]_N1-O2'(hydroxyl)[2.68]	(3,2)	4	5	2	2	0	0	0	0	0	cH.	cWS
3la5.cif1	intra	42	112	A.A.66.	A.G.38.	A.C.60.	WC	19-XIX	cWW	cW-W	X	A|G-C	HP	S	S	LC	LC	SM	UAAACUC	AUGGUUU	GAGCCUU	abAcBC	1,2,-1,3,-2,-3	2	Adenosine RIboswitch	Adenosine RIboswitch	Adenosine RIboswitch	bacillus subtilis	bacillus subtilis	bacillus subtilis	N6(amino)-N3[3.27]_N1-N2(amino)[2.93]		(3,2)	4	5	2	2	0	0	0	0	0	tWS
3moj.cif1	intra	43	113	A.A.2564.	A.C.2521.	A.G.2543.	WC	19-XIX	cWW	cW-W	II	A|C-G	JC	S	S	LC	LC	SM	UUUAAAG	AUCCUGG	CAAGGGU				RNA (69-MER)	RNA (69-MER)	RNA (69-MER)	escherichia coli	escherichia coli	escherichia coli	O2'(hydroxyl)-O2'(hydroxyl)[2.65]_N3-O2'(hydroxyl)[2.89]		(2,2)	3	5	5	5	0	0	0	0	0
3moj.cif1	intra	43	113	A.A.2565.	A.C.2520.	A.G.2544.	WC	19-XIX	cWW	cW-W	I	A|C-G	JC	S	S	LC	LC	SM	UUAAAGU	CAUCCUG	AAGGGUA				RNA (69-MER)	RNA (69-MER)	RNA (69-MER)	escherichia coli	escherichia coli	escherichia coli	O2'(hydroxyl)-O2'(hydroxyl)[2.59]_O2'(hydroxyl)-O2(carbonyl)[2.81]	N1-O2'(hydroxyl)[3.04]_N3-N2(amino)[3.39]	(2,2)	3	5	5	5	0	0	0	0	0		tSS	Exterior Loop	Stem
3moj.cif1	intra	0	114	A.A.2581.	A.G.2508.	A.U.2580.	NA	n/a	cWW	cW-W	X	A|G-U	HC	HC	HC	SM	SM	SM	GCUANNN	NNNGGCU	AGCUANN				RNA (69-MER)	RNA (69-MER)	RNA (69-MER)	escherichia coli	escherichia coli	escherichia coli	N7-N2(amino)[3.24]_N6(amino)-O2'(hydroxyl)[2.89]_N6(amino)-N3[3.11]	O5'-O2'(hydroxyl)[2.86]	(1,1)	2	2	1	2	0	0	0	0	0	tHS
3mqk.cif1	inter	0	115	D.A.14.	D.C.12.	E.G.9.	WC	19-XIX	cWW	cW-W	X	A|C-G	HC	S	S	LC	LC	SM	UCCACAG	GAUCCAC	NNCGAUC				RNA (5'-R(P*GP*UP*UP*CP*GP*AP*UP*CP*CP*AP*CP*AP*G)-3')	RNA (5'-R(P*GP*UP*UP*CP*GP*AP*UP*CP*CP*AP*CP*AP*G)-3')	RNA (5'-R(P*CP*GP*AP*UP*CP*CP*AP*CP*A)-3')	unspecified	unspecified	unspecified	N7-O2'(hydroxyl)[2.77]	N1-N2(amino)[2.76]	(1,1)	3	5	4	4	0	0	0	0	0		cWW
3mxh.cif1	intra	44	116	R.A.18.	R.C.92.	R.C2E.1.	WC	19-XIX	cWW	cW-W	X	A|C-g	JC	JC	NA	SM	NA	NA	CACAGGG	UUACCGA	NNNMGUC				c-di-GMP riboswitch	c-di-GMP riboswitch	c-di-GMP riboswitch	unspecified	unspecified	unspecified		N6(amino)-O2'(hydroxyl)[3.40]_N6(amino)-O11[3.22]_N1-N2(amino)[2.91]	(3,3)	6	6	3	5	0	0	0	0	0		tHS
3mxh.cif1	intra	45	117	R.A.34.	R.U.60.	R.A.78.	WC	20-XX	cWW	cW-W	II	A|U-A	HC	S	S	LR	LR	SM	CGAAAGA	GCCUAAA	GGUAGGU				c-di-GMP riboswitch	c-di-GMP riboswitch	c-di-GMP riboswitch	unspecified	unspecified	unspecified	O2'(hydroxyl)-O3'[3.18]_O2'(hydroxyl)-O2'(hydroxyl)[2.85]_N3-O2'(hydroxyl)[2.74]		(3,2)	4	4	5	5	1	0	0	0	1
3mxh.cif1	intra	45	117	R.A.35.	R.C.59.	R.G.79.	WC	19-XIX	cWW	cW-W	I	A|C-G	HC	S	S	LR	LR	SM	GAAAGAG	GGCCUAA	GUAGGUA				c-di-GMP riboswitch	c-di-GMP riboswitch	c-di-GMP riboswitch	unspecified	unspecified	unspecified	O2'(hydroxyl)-O2'(hydroxyl)[2.70]_O2'(hydroxyl)-O2(carbonyl)[3.24]	N1-O2'(hydroxyl)[3.06]_N3-N2(amino)[3.18]	(3,2)	4	4	5	5	1	0	0	0	1		tSS
3mxh.cif1	intra	44	116	R.A.47.	R.C.92.	R.C2E.1.	WC	19-XIX	cWW	cW-W	X	A|C-g	JC	JC	NA	SM	NA	NA	CGCAAAG	UUACCGA	NNNMGUC				c-di-GMP riboswitch	c-di-GMP riboswitch	c-di-GMP riboswitch	unspecified	unspecified	unspecified		OP2-O2A[2.58]_O2'(hydroxyl)-N7[2.75]_N6(amino)-O11[2.76]	(3,3)	6	3	3	5	1	0	0	0	1
3mxh.cif1	intra	0	118	R.A.49.	R.C.22.	R.G.45.	WC	19-XIX	cWW	cW-W	I	A|C-G	JC	S	S	LC	LC	SM	CAAAGCC	GGGCAAA	GACGCAA				c-di-GMP riboswitch	c-di-GMP riboswitch	c-di-GMP riboswitch	unspecified	unspecified	unspecified	O2'(hydroxyl)-O2(carbonyl)[3.14]	O2'(hydroxyl)-N2(amino)[3.13]_N1-O2'(hydroxyl)[2.69]_N3-N2(amino)[3.40]	(1,1)	3	3	2	2	0	0	0	0	0		tSS
3mxh.cif1	intra	45	117	R.A.62.	R.U.60.	R.A.78.	WC	20-XX	cWW	cW-W	X	A|U-A	BC	S	S	LC	LC	SM	CUAAACC	GCCUAAA	GGUAGGU				c-di-GMP riboswitch	c-di-GMP riboswitch	c-di-GMP riboswitch	unspecified	unspecified	unspecified		N6(amino)-N3[3.42]	(3,2)	4	2	5	5	0	0	0	0	0		cWS
3mxh.cif1	intra	44	116	R.A.95.	R.C.13.	R.G.94.	WC	19-XIX	cWW	cW-W	X	A|C-G	HC	S	S	LC	LC	SM	CCGAUGG	UCACGCA	ACCGAUG				c-di-GMP riboswitch	c-di-GMP riboswitch	c-di-GMP riboswitch	unspecified	unspecified	unspecified		N1-N2(amino)[3.42]	(3,3)	6	4	2	2	0	0	0	0	0		cWS
3mxh.cif1	intra	44	116	R.A.95.	R.G.14.	R.C.93.	WC	19-XIX	cWW	cW-W	X	A|G-C	HC	S	S	LC	LC	SM	CCGAUGG	CACGCAC	UACCGAU				c-di-GMP riboswitch	c-di-GMP riboswitch	c-di-GMP riboswitch	unspecified	unspecified	unspecified	N6(amino)-N3[2.94]		(3,3)	6	4	2	2	0	0	0	0	0
3ndb.cif1	intra	0	119	M.A.177.	M.C.198.	M.G.223.	WC	19-XIX	cWW	cW-W	I	A|C-G	IC	S	S	LR	LR	SM	GUAACCC	ACCCCGC	ACGGUAG				SRP RNA	SRP RNA	SRP RNA	methanocaldococcus jannaschii	methanocaldococcus jannaschii	methanocaldococcus jannaschii	N6(amino)-O2'(hydroxyl)[3.06]_N1-O2'(hydroxyl)[2.60]	N3-N2(amino)[3.39]	(1,1)	3	2	3	3	1	0	1	0	1	tWS	cSS
3nkb.cif1	intra	0	120	B.A.42.	B.C.22.	B.G.39.	WC	19-XIX	cWW	cW-W	X	A|C-G	JI	S	S	LC	LC	SM	GGCAACA	CCUCCUC	CUGGGCA	abcdCADB	1,2,3,4,-3,-1,-4,-2	4	The hepatitis delta virus ribozyme	The hepatitis delta virus ribozyme	The hepatitis delta virus ribozyme	homo sapiens	homo sapiens	homo sapiens	N6(amino)-O2(carbonyl)[2.75]_N1-O2'(hydroxyl)[2.70]		(1,1)	3	4	2	2	1	1	0	0	1	cWS
3nkb.cif1	intra	46	121	B.A.64.	B.C.20.	B.G.28.	WC	19-XIX	cWW	cW-W	II	A|C-G	JI	S	S	LC	LC	SM	GCGAAUG	AGCCUCC	CGCGGCG	abcdCADB	1,2,3,4,-3,-1,-4,-2	3	The hepatitis delta virus ribozyme	The hepatitis delta virus ribozyme	The hepatitis delta virus ribozyme	homo sapiens	homo sapiens	homo sapiens	O2'(hydroxyl)-O3'[3.10]_O2'(hydroxyl)-O2'(hydroxyl)[2.76]_N3-O2'(hydroxyl)[2.72]		(2,2)	3	5	3	3	1	0	0	0	1	cSS
3nkb.cif1	intra	46	121	B.A.65.	B.C.19.	B.G.29.	WC	19-XIX	cWW	cW-W	I	A|C-G	JI	S	S	LC	LC	SM	CGAAUGC	CAGCCUC	GCGGCGC	abcdCADB	1,2,3,4,-3,-1,-4,-2	3	The hepatitis delta virus ribozyme	The hepatitis delta virus ribozyme	The hepatitis delta virus ribozyme	homo sapiens	homo sapiens	homo sapiens	O2'(hydroxyl)-O2'(hydroxyl)[2.70]_O2'(hydroxyl)-O2(carbonyl)[2.96]	N1-O2'(hydroxyl)[2.55]_N3-N2(amino)[2.92]	(2,2)	3	5	3	3	0	0	0	0	0		tSS	Multi Loop	Stem
3npq.cif1	intra	47	122	A.A.43.	A.G.5.	A.C.34.	WC	19-XIX	cWW	cW-W	X	A|G-C	IP	S	S	LC	LC	SM	UUCAAAC	GACGAGG	GCUCGUC	abAB	1,2,-1,-2	1	S-ADENOSYLHOMOCYSTEINE RIBOSWITCH	S-ADENOSYLHOMOCYSTEINE RIBOSWITCH	S-ADENOSYLHOMOCYSTEINE RIBOSWITCH	ralstonia solanacearum	ralstonia solanacearum	ralstonia solanacearum		N6(amino)-O2(carbonyl)[2.74]_N1-O2'(hydroxyl)[2.57]	(3,3)	3	12	4	4	0	0	0	0	0		cWS
3npq.cif1	intra	47	122	A.A.44.	A.A.6.	A.U.33.	WC	20-XX	cWW	cW-W	X	A|A-U	IP	S	S	LC	LC	SM	UCAAACG	ACGAGGA	GGCUCGU	abAB	1,2,-1,-2	1	S-ADENOSYLHOMOCYSTEINE RIBOSWITCH	S-ADENOSYLHOMOCYSTEINE RIBOSWITCH	S-ADENOSYLHOMOCYSTEINE RIBOSWITCH	ralstonia solanacearum	ralstonia solanacearum	ralstonia solanacearum		N6(amino)-O2(carbonyl)[2.94]_N1-O2'(hydroxyl)[2.81]	(3,3)	3	12	4	4	0	0	0	0	0		cWS
3npq.cif1	intra	47	122	A.A.45.	A.G.7.	A.C.32.	WC	19-XIX	cWW	cW-W	X	A|G-C	IP	S	S	LC	LC	SM	CAAACGG	CGAGGAG	AGGCUCG	abAB	1,2,-1,-2	1	S-ADENOSYLHOMOCYSTEINE RIBOSWITCH	S-ADENOSYLHOMOCYSTEINE RIBOSWITCH	S-ADENOSYLHOMOCYSTEINE RIBOSWITCH	ralstonia solanacearum	ralstonia solanacearum	ralstonia solanacearum	N6(amino)-O2'(hydroxyl)[3.23]_N6(amino)-N3[3.08]_N1-N2(amino)[2.95]		(3,3)	3	12	4	4	0	0	0	0	0	tWS
3oxe.cif1	intra	0	123	A.A.11.	A.C.30.	A.G.73.	WC	19-XIX	cWW	cW-W	I	A|C-G	JC	S	S	LC	LC	SM	GAGAGAA	UCGCCGA	CAGGCAA				domain II of glycine riboswitch	domain II of glycine riboswitch	domain II of glycine riboswitch	unspecified	unspecified	unspecified	O2'(hydroxyl)-O2'(hydroxyl)[2.80]_O2'(hydroxyl)-O2(carbonyl)[2.97]	N1-O2'(hydroxyl)[2.54]_N3-N2(amino)[3.20]	(1,1)	3	6	3	3	1	0	0	0	1		tSS
3oxe.cif1	inter	48	124	A.A.40.	B.C.5.	B.G.84.	WC	19-XIX	cWW	cW-W	X	A|C-G	IC	S	S	LR	LR	SM	AGCAAGC	GCUCUGG	ACAGAGU				domain II of glycine riboswitch	domain II of glycine riboswitch	domain II of glycine riboswitch	unspecified	unspecified	unspecified		N6(amino)-O2'(hydroxyl)[2.96]	(4,3)	4	3	7	7	1	1	0	0	1
3oxe.cif1	inter	48	124	A.A.40.	B.U.6.	B.A.83.	WC	20-XX	cWW	cW-W	X	A|U-A	IC	S	S	LR	LR	SM	AGCAAGC	CUCUGGA	GACAGAG				domain II of glycine riboswitch	domain II of glycine riboswitch	domain II of glycine riboswitch	unspecified	unspecified	unspecified	O2'(hydroxyl)-O3'[3.05]_O2'(hydroxyl)-O2'(hydroxyl)[2.55]_N3-O2'(hydroxyl)[2.67]		(4,3)	4	3	7	7	1	1	0	0	1
3oxe.cif1	inter	48	124	A.A.41.	B.C.5.	B.G.84.	WC	19-XIX	cWW	cW-W	I	A|C-G	IC	S	S	LR	LR	SM	GCAAGCU	GCUCUGG	ACAGAGU				domain II of glycine riboswitch	domain II of glycine riboswitch	domain II of glycine riboswitch	unspecified	unspecified	unspecified	O2'(hydroxyl)-O2'(hydroxyl)[3.02]	N1-O2'(hydroxyl)[2.93]_N3-N2(amino)[3.19]	(4,3)	4	3	7	7	1	0	0	0	1		tSS
3oxe.cif1	inter	48	124	A.A.63.	B.U.6.	B.A.83.	WC	20-XX	cWW	cW-W	X	A|U-A	IC	S	S	LR	LR	SM	GUGAAAC	CUCUGGA	GACAGAG				domain II of glycine riboswitch	domain II of glycine riboswitch	domain II of glycine riboswitch	unspecified	unspecified	unspecified		O2'(hydroxyl)-O3'[2.94]_O2'(hydroxyl)-O2'(hydroxyl)[2.71]_N3-O2'(hydroxyl)[2.82]	(4,3)	4	4	7	7	1	0	0	0	1
3oxe.cif1	inter	48	124	A.A.64.	B.G.7.	B.C.82.	WC	19-XIX	cWW	cW-W	I	A|G-C	IC	S	S	LR	LR	SM	UGAAACU	UCUGGAG	GGACAGA				domain II of glycine riboswitch	domain II of glycine riboswitch	domain II of glycine riboswitch	unspecified	unspecified	unspecified	N1-O2'(hydroxyl)[2.71]_N3-N2(amino)[3.28]		(4,3)	4	4	7	7	1	0	0	0	1	t.S
3oxe.cif1	inter	49	125	B.A.40.	A.U.6.	A.A.83.	WC	20-XX	cWW	cW-W	II	A|U-A	IC	S	S	LR	LR	SM	AGCAAGC	CUCUGGA	GACAGAG				domain II of glycine riboswitch	domain II of glycine riboswitch	domain II of glycine riboswitch	unspecified	unspecified	unspecified	O2'(hydroxyl)-O3'[3.15]_O2'(hydroxyl)-O2'(hydroxyl)[2.62]_N3-O2'(hydroxyl)[2.76]		(4,3)	4	3	7	7	1	1	0	0	1
3oxe.cif1	inter	49	125	B.A.41.	A.C.5.	A.G.84.	WC	19-XIX	cWW	cW-W	I	A|C-G	IC	S	S	LR	LR	SM	GCAAGCU	GCUCUGG	ACAGAGU				domain II of glycine riboswitch	domain II of glycine riboswitch	domain II of glycine riboswitch	unspecified	unspecified	unspecified	O2'(hydroxyl)-O2'(hydroxyl)[2.91]	N1-O2'(hydroxyl)[2.68]_N3-N2(amino)[3.27]	(4,3)	4	3	7	7	1	0	0	0	1		tSS
3oxe.cif1	inter	49	125	B.A.63.	A.U.6.	A.A.83.	WC	20-XX	cWW	cW-W	X	A|U-A	IC	S	S	LR	LR	SM	GUGAAAC	CUCUGGA	GACAGAG				domain II of glycine riboswitch	domain II of glycine riboswitch	domain II of glycine riboswitch	unspecified	unspecified	unspecified		O2'(hydroxyl)-O3'[3.03]_O2'(hydroxyl)-O2'(hydroxyl)[2.65]_N3-O2'(hydroxyl)[2.79]	(4,3)	4	4	7	7	1	0	0	0	1
3oxe.cif1	inter	49	125	B.A.64.	A.G.7.	A.C.82.	WC	19-XIX	cWW	cW-W	I	A|G-C	IC	S	S	LR	LR	SM	UGAAACU	UCUGGAG	GGACAGA				domain II of glycine riboswitch	domain II of glycine riboswitch	domain II of glycine riboswitch	unspecified	unspecified	unspecified	N1-O2'(hydroxyl)[2.62]_N3-N2(amino)[3.39]		(4,3)	4	4	7	7	1	0	0	0	1	tWS
3p22.cif1	inter	50	126	B.A.3.	A.G.6.	A.C.35.	WC	19-XIX	cWW	cW-W	II	A|G-C	HP	S	S	LC	LC	SM	NAAAAAA	CUGGGUU	AUCCCAG	abAB	1,2,-1,-2	1	oligo(A)9 RNA	Core ENE hairpin from KSHV PAN RNA	Core ENE hairpin from KSHV PAN RNA	unspecified	unspecified	unspecified		O2'(hydroxyl)-O2'(hydroxyl)[2.78]_N3-O2'(hydroxyl)[2.83]	(2,2)	3	4	7	7	0	0	0	0	0
3p22.cif1	inter	50	126	B.A.4.	A.G.7.	A.C.34.	WC	19-XIX	cWW	cW-W	I	A|G-C	HP	S	S	LC	LC	SM	AAAAAAA	UGGGUUU	UAUCCCA	abAB	1,2,-1,-2	1	oligo(A)9 RNA	Core ENE hairpin from KSHV PAN RNA	Core ENE hairpin from KSHV PAN RNA	unspecified	unspecified	unspecified	N1-O2'(hydroxyl)[2.63]_N3-N2(amino)[2.94]	O2'(hydroxyl)-O2'(hydroxyl)[2.77]_O2'(hydroxyl)-O2(carbonyl)[2.64]	(2,2)	3	4	7	7	0	0	0	0	0	tSS
3p22.cif1	inter	0	127	C.A.21.	A.C.17.	A.G.22.	WC	19-XIX	cWW	cW-W	X	A|C-G	HC	S	S	LR	LR	SM	GAAAGAA	CUUCGAA	AAAGAAG				Core ENE hairpin from KSHV PAN RNA	Core ENE hairpin from KSHV PAN RNA	Core ENE hairpin from KSHV PAN RNA	unspecified	unspecified	unspecified	N3-O2'(hydroxyl)[2.82]		(1,1)	3	4	5	5	1	0	0	0	1
3pdr.cif1	intra	51	128	X.A.70.	X.G.22.	X.C.163.	WC	19-XIX	cWW	cW-W	X	A|G-C	HC	S	S	LR	LR	SM	UCCAAAG	UUCGUUA	CUACGAU				M-box Riboswitch RNA	M-box Riboswitch RNA	M-box Riboswitch RNA	bacillus subtilis	bacillus subtilis	bacillus subtilis	N6(amino)-O2'(hydroxyl)[3.48]		(2,1)	3	4	2	2	0	0	0	0	0
3pdr.cif1	intra	51	128	X.A.71.	X.G.22.	X.C.163.	WC	19-XIX	cWW	cW-W	I	A|G-C	HC	S	S	LR	LR	SM	CCAAAGA	UUCGUUA	CUACGAU				M-box Riboswitch RNA	M-box Riboswitch RNA	M-box Riboswitch RNA	bacillus subtilis	bacillus subtilis	bacillus subtilis	N3-N2(amino)[3.14]	O3'-O2'(hydroxyl)[3.17]_O2'(hydroxyl)-O2'(hydroxyl)[2.88]_O2'(hydroxyl)-O2(carbonyl)[2.61]	(2,1)	3	4	2	2	0	0	0	0	0	tSS
3pdr.cif1	intra	52	129	X.A.87.	X.C.58.	X.G.83.	WC	19-XIX	cWW	cW-W	X	A|C-G	JC	S	S	LC	LC	SM	GUCAACA	UGCCCAA	AUGGGUC				M-box Riboswitch RNA	M-box Riboswitch RNA	M-box Riboswitch RNA	bacillus subtilis	bacillus subtilis	bacillus subtilis	N6(amino)-O2'(hydroxyl)[3.03]_N1-O2'(hydroxyl)[2.63]		(3,3)	4	5	5	5	0	1	0	0	1
3pdr.cif1	intra	0	130	X.A.88.	X.C.33.	X.G.151.	WC	19-XIX	cWW	cW-W	I	A|C-G	JC	S	S	LR	LR	SM	UCAACAG	AGGCUCC	AGUGCUA				M-box Riboswitch RNA	M-box Riboswitch RNA	M-box Riboswitch RNA	bacillus subtilis	bacillus subtilis	bacillus subtilis	O2'(hydroxyl)-O2'(hydroxyl)[2.66]_O2'(hydroxyl)-O2(carbonyl)[3.01]	N1-O2'(hydroxyl)[3.20]_N3-N2(amino)[3.17]	(1,1)	3	5	3	3	0	1	0	0	1		tSS
3pdr.cif1	intra	52	129	X.A.90.	X.C.59.	X.G.82.	WC	19-XIX	cWW	cW-W	II	A|C-G	JC	S	S	LC	LC	SM	AACAGAA	GCCCAAA	AAUGGGU				M-box Riboswitch RNA	M-box Riboswitch RNA	M-box Riboswitch RNA	bacillus subtilis	bacillus subtilis	bacillus subtilis	N3-O2'(hydroxyl)[2.97]	N1-N2(amino)[3.00]	(3,3)	4	5	5	5	0	1	0	0	1		tW.
3pdr.cif1	intra	53	131	X.A.105.	X.C.68.	X.G.73.	WC	19-XIX	cWW	cW-W	II	A|C-G	HC	S	S	LR	LR	SM	CAUAAGG	UGUCCAA	AAAGACG				M-box Riboswitch RNA	M-box Riboswitch RNA	M-box Riboswitch RNA	bacillus subtilis	bacillus subtilis	bacillus subtilis	O2'(hydroxyl)-O2'(hydroxyl)[2.45]_N3-O2'(hydroxyl)[2.82]		(2,1)	3	7	4	4	0	0	0	0	0	cSS
3pdr.cif1	intra	53	131	X.A.106.	X.C.68.	X.G.73.	WC	19-XIX	cWW	cW-W	II	A|C-G	HC	S	S	LR	LR	SM	AUAAGGU	UGUCCAA	AAAGACG				M-box Riboswitch RNA	M-box Riboswitch RNA	M-box Riboswitch RNA	bacillus subtilis	bacillus subtilis	bacillus subtilis	O4'-O2'(hydroxyl)[3.18]	N3-N2(amino)[3.17]	(2,1)	3	7	4	4	0	0	0	0	0		tSW
3pdr.cif1	intra	52	129	X.A.117.	X.C.57.	X.G.84.	WC	19-XIX	cWW	cW-W	I	A|C-G	JC	S	S	LC	LC	SM	UUUAAUG	CUGCCCA	UGGGUCA				M-box Riboswitch RNA	M-box Riboswitch RNA	M-box Riboswitch RNA	bacillus subtilis	bacillus subtilis	bacillus subtilis	O2'(hydroxyl)-O2'(hydroxyl)[2.73]_O2'(hydroxyl)-O2(carbonyl)[2.56]	N1-O2'(hydroxyl)[2.74]_N3-N2(amino)[3.05]	(3,3)	4	4	5	5	0	0	0	0	0		t.S
3pdr.cif1	intra	0	132	X.A.155.	X.C.99.	X.G.107.	WC	19-XIX	cWW	cW-W	I	A|C-G	IC	S	S	LR	LR	SM	CUAAAGC	CAUCGAC	UAAGGUG				M-box Riboswitch RNA	M-box Riboswitch RNA	M-box Riboswitch RNA	bacillus subtilis	bacillus subtilis	bacillus subtilis	O2'(hydroxyl)-O2'(hydroxyl)[2.78]_O2'(hydroxyl)-O2(carbonyl)[2.69]	N1-O2'(hydroxyl)[2.84]_N3-N2(amino)[3.04]	(1,1)	3	3	9	9	0	0	0	0	0		t.S
3q3z.cif1	intra	0	133	V.A.34.	V.U.31.	V.G.46.	WB	28-XXVIII	cWW	cW-W	X	A|U-G	HP	S	S	LC	LC	SM	UUAAAUU	GGUUUAA	CUUGACU	abAB	1,2,3,4,-2,-1,-4,-3	2	c-di-GMP-II riboswitch	c-di-GMP-II riboswitch	c-di-GMP-II riboswitch	clostridium acetobutylicum	clostridium acetobutylicum	clostridium acetobutylicum		N6(amino)-N3[3.22]_N1-N2(amino)[3.22]	(1,1)	3	6	9	9	0	0	0	0	0		tWS
3r9x.cif1	intra	0	134	C.A.1518.	C.G.1516.	C.C.1520.	WC	19-XIX	cWW	cW-W	X	A|G-C	HC	HC	HC	SM	SM	SM	GGGAACC	AGGGGAA	GAACCUG				RNA301	RNA301	RNA301	unspecified	unspecified	unspecified	N7-N2(amino)[2.80]		(1,1)	1	6	6	6	1	0	0	0	1	tHW
3rg5.cif1	intra	0	135	B.A.8.	B.C.46.	B.G.47.L	WC	19-XIX	cWW	cW-W	I	A|C-G	JC	S	S	LC	LC	SM	AUGAUCC	UAGCUGU	ACAGAGU				tRNA(Sec)	tRNA(Sec)	tRNA(Sec)	mus musculus	mus musculus	mus musculus		N1-O2'(hydroxyl)[2.73]	(1,1)	3	4	5	5	0	0	0	0	0
3rkf.cif1	intra	0	136	C.A.23.	C.G.46.	C.C.53.	WC	19-XIX	cWW	cW-W	X	A|G-C	II	HP	HP	LR	LR	SM	UAUAACU	CAGGUUU	CUACCGG				Guanine riboswitch	Guanine riboswitch	Guanine riboswitch	unspecified	unspecified	unspecified	N6(amino)-N3[2.86]_N1-N2(amino)[3.31]		(1,1)	2	3	8	8	0	0	1	0	1	tWS
3rkf.cif1	intra	54	137	C.A.33.	C.A.37.	C.U.61.	WC	20-XX	cWW	cW-W	II	A|A-U	HP	S	S	LC	LC	SM	UGGAUAU	UAUAGCA	CACUGUA	abAcBC	1,2,-1,3,-2,-3	2	Guanine riboswitch	Guanine riboswitch	Guanine riboswitch	unspecified	unspecified	unspecified	O2'(hydroxyl)-O2'(hydroxyl)[2.87]_N3-O2'(hydroxyl)[2.82]		(3,2)	4	5	2	2	0	0	0	0	0
3rkf.cif1	intra	54	137	C.A.65.	C.A.37.	C.U.61.	WC	20-XX	cWW	cW-W	X	A|A-U	HP	S	S	LC	LC	SM	GUAAAUG	UAUAGCA	CACUGUA	abAcBC	1,2,-1,3,-2,-3	2	Guanine riboswitch	Guanine riboswitch	Guanine riboswitch	unspecified	unspecified	unspecified		N1-O2'(hydroxyl)[2.67]	(3,2)	4	5	2	2	1	0	0	0	1
3rkf.cif1	intra	54	137	C.A.66.	C.G.38.	C.C.60.	WC	19-XIX	cWW	cW-W	X	A|G-C	HP	S	S	LC	LC	SM	UAAAUGU	AUAGCAC	GCACUGU	abAcBC	1,2,-1,3,-2,-3	2	Guanine riboswitch	Guanine riboswitch	Guanine riboswitch	unspecified	unspecified	unspecified	N6(amino)-N3[3.27]_N1-N2(amino)[2.76]		(3,2)	4	5	2	2	0	0	0	0	0	tWS
3rw6.cif1	intra	0	138	H.A.40.	H.G.21.	H.U.38.	WB	28-XXVIII	cWW	cW-W	X	A|G-U	BC	S	S	LC	LC	SM	CUAAUCC	GGAGGGC	GCCUAAU				constitutive transport element(CTE)of Mason-Pfizer monkey virus RNA	constitutive transport element(CTE)of Mason-Pfizer monkey virus RNA	constitutive transport element(CTE)of Mason-Pfizer monkey virus RNA	unspecified	unspecified	unspecified	N7-N2(amino)[2.80]_N6(amino)-O2'(hydroxyl)[2.98]_N6(amino)-N3[2.80]		(1,1)	3	2	4	4	0	0	0	0	0	tHS
3rw6.cif1	intra	0	139	H.A.48.	H.G.18.	H.C.43.	WC	19-XIX	cWW	cW-W	I	A|G-C	IC	S	S	LC	LC	SM	AUGACGG	ACAGGAG	AUCCAAU				constitutive transport element(CTE)of Mason-Pfizer monkey virus RNA	constitutive transport element(CTE)of Mason-Pfizer monkey virus RNA	constitutive transport element(CTE)of Mason-Pfizer monkey virus RNA	unspecified	unspecified	unspecified	N1-O2'(hydroxyl)[2.47]_N3-N2(amino)[2.88]	O2'(hydroxyl)-O2'(hydroxyl)[2.81]	(1,1)	3	6	3	3	0	0	1	0	1	tSS
3rw6.cif1	intra	0	140	H.A.55.	H.C.9.	H.G.52.	WC	19-XIX	cWW	cW-W	X	A|C-G	BC	S	S	LC	LC	SM	GUAAUAG	UAACCUA	CGGGUAA				constitutive transport element(CTE)of Mason-Pfizer monkey virus RNA	constitutive transport element(CTE)of Mason-Pfizer monkey virus RNA	constitutive transport element(CTE)of Mason-Pfizer monkey virus RNA	unspecified	unspecified	unspecified	N6(amino)-O2(carbonyl)[2.79]_N1-O2'(hydroxyl)[2.56]		(1,1)	3	2	4	4	1	1	0	0	1	cWS
3ski.cif1	intra	0	141	A.A.32.	A.G.53.	A.C.60.	WC	19-XIX	cWW	cW-W	X	A|G-C	II	HP	HP	LR	LR	SM	UACAGGG	ACUGACC	CCGCCUU				RNA (68-MER)	RNA (68-MER)	RNA (68-MER)	unspecified	unspecified	unspecified	N6(amino)-O2'(hydroxyl)[2.98]_N1-N2(amino)[2.82]		(1,1)	2	3	8	8	0	0	0	0	0	tWS
3ski.cif1	intra	0	142	A.A.42.	A.G.45.	A.C.69.	WC	19-XIX	cWW	cW-W	X	A|G-C	HP	S	S	LC	LC	SM	CAUAAUG	AAUGGGC	AACCUAU	abAcBC	1,2,-1,3,-2,-3	2	RNA (68-MER)	RNA (68-MER)	RNA (68-MER)	unspecified	unspecified	unspecified	N1-N2(amino)[3.16]_N3-O2'(hydroxyl)[2.74]		(1,1)	3	5	2	2	0	0	0	0	0	cWS
3skl.cif1	intra	0	143	B.A.31.	B.G.52.	B.C.59.	WC	19-XIX	cWW	cW-W	X	A|G-C	II	HP	HP	LR	LR	SM	UACAGGG	ACUGACC	CCGCCUU				RNA (66-MER)	RNA (66-MER)	RNA (66-MER)	unspecified	unspecified	unspecified	N6(amino)-O2'(hydroxyl)[3.24]		(1,1)	2	3	8	8	0	0	0	0	0	tWS
3skl.cif1	intra	0	144	B.A.41.	B.G.44.	B.C.68.	WC	19-XIX	cWW	cW-W	X	A|G-C	HP	S	S	LC	LC	SM	CAUAAUG	AAUGGGC	AACCUAU	abAcBC	1,2,-1,3,-2,-3	2	RNA (66-MER)	RNA (66-MER)	RNA (66-MER)	unspecified	unspecified	unspecified	O2'(hydroxyl)-O2'(hydroxyl)[3.11]_N1-N2(amino)[2.95]_N3-O2'(hydroxyl)[2.71]		(1,1)	3	5	2	2	0	0	0	0	0	cWS
3skl.cif1	inter	0	145	B.A.53.	A.U.61.	A.A.76.	WC	20-XX	cWW	cW-W	X	A|U-A	HP	S	S	LR	LR	SM	CUGACCC	GCCUUCA	UGGAGAC	abAcBC	1,2,-1,3,-2,-3	3	RNA (66-MER)	RNA (66-MER)	RNA (66-MER)	unspecified	unspecified	unspecified		O2'(hydroxyl)-O2'(hydroxyl)[2.87]_N3-O2'(hydroxyl)[3.29]	(1,1)	3	8	7	7	0	0	1	0	1
3sux.cif1	intra	55	146	X.A.25.	X.G.22.	X.C.75.	WC	19-XIX	cWW	cW-W	X	A|G-C	JC	S	S	LC	LC	SM	GUAAAGU	UGCGUAA	UGGCGGU	abAB	1,2,3,4,-3,-2,-1,-4	2	Riboswitch	Riboswitch	Riboswitch	eubacterium siraeum	eubacterium siraeum	eubacterium siraeum	N1-N2(amino)[3.24]_N3-O2'(hydroxyl)[2.65]		(3,3)	4	6	3	3	1	0	0	0	1	cWS
3sux.cif1	intra	55	146	X.A.26.	X.C.21.	X.G.76.	WC	19-XIX	cWW	cW-W	X	A|C-G	JC	S	S	LC	LC	SM	UAAAGUG	GUGCGUA	GGCGGUA	abAB	1,2,3,4,-3,-2,-1,-4	2	Riboswitch	Riboswitch	Riboswitch	eubacterium siraeum	eubacterium siraeum	eubacterium siraeum		N1-N2(amino)[3.17]	(3,3)	4	6	3	3	0	0	0	0	0		tWS
3sux.cif1	intra	55	146	X.A.61.	X.U.23.	X.G.74.	WB	28-XXVIII	cWW	cW-W	I	A|U-G	IPJC	S	S	LC	LC	SM	CGAACAC	GCGUAAA	GUGGCGG	abAB	1,2,3,4,-3,-2,-1,-4	2	Riboswitch	Riboswitch	Riboswitch	eubacterium siraeum	eubacterium siraeum	eubacterium siraeum		O2'(hydroxyl)-N2(amino)[3.37]_N1-O2'(hydroxyl)[2.69]_N3-N2(amino)[3.09]	(3,3)	4	5	3	3	0	1	0	0	1		tSS
3tzr.cif1	inter	0	147	A.A.57.	A.G.52.	B.C.111.	WC	19-XIX	cWW	cW-W	X	A|G-C	BC	S	S	LC	LC	SM	ACUACUG	GAGGAAC	CAGCCUC				5'-R(*CP*GP*AP*GP*GP*AP*AP*CP*UP*AP*CP*UP*GP*UP*CP*UP*UP*CP*CP*C)-3'	5'-R(*CP*GP*AP*GP*GP*AP*AP*CP*UP*AP*CP*UP*GP*UP*CP*UP*UP*CP*CP*C)-3'	5'-R(*GP*GP*UP*CP*GP*UP*GP*CP*AP*GP*CP*CP*UP*CP*GP*G)-3'	hepatitis c virus	hepatitis c virus	hepatitis c virus	N6(amino)*N2(amino)[3.35]	N6(amino)-O2(carbonyl)[2.92]_N1-O2'(hydroxyl)[2.51]	(1,1)	3	5	5	5	0	1	0	0	1		cWS
3u4m.cif1	intra	0	148	B.A.2173.	B.G.2127.	B.C.2161.	WC	19-XIX	cWW	cW-W	I	A|G-C	IC	S	S	LC	LC	SM	AAUACCA	GGAGCCU	AGGCGCC				RNA (80-MER)	RNA (80-MER)	RNA (80-MER)	thermus thermophilus	thermus thermophilus	thermus thermophilus	N1-O2'(hydroxyl)[2.97]_N3-N2(amino)[2.91]	O2'(hydroxyl)-O2'(hydroxyl)[2.97]	(1,1)	3	12	3	3	0	1	0	0	1	tSS
3v7e.cif1	intra	0	149	C.A.12.	C.G.43.	C.C.91.	WC	19-XIX	cWW	cW-W	I	A|G-C	JI	S	S	LR	LR	SM	AAGAGAG	CCGGCAA	GUGCCAA				SAM-I riboswitch aptamer with an engineered helix P3	SAM-I riboswitch aptamer with an engineered helix P3	SAM-I riboswitch aptamer with an engineered helix P3	caldanaerobacter subterraneus	caldanaerobacter subterraneus	caldanaerobacter subterraneus	O2'(hydroxyl)-O2'(hydroxyl)[2.99]_N3-N2(amino)[2.76]	N1-O2'(hydroxyl)[2.75]	(1,1)	3	6	3	3	1	0	0	0	1	cSS	tWS	Multi Loop	Stem
3v7e.cif1	intra	0	150	C.A.24.	C.U.96.	C.A.117.	WC	20-XX	cWW	cW-W	X	A|U-A	HP	IP	JI	LR	LR	LR	GGGACUG	AAUUCCU	GAAAGAU				SAM-I riboswitch aptamer with an engineered helix P3	SAM-I riboswitch aptamer with an engineered helix P3	SAM-I riboswitch aptamer with an engineered helix P3	caldanaerobacter subterraneus	caldanaerobacter subterraneus	caldanaerobacter subterraneus		N6(amino)-N3[3.21]_N1-O2'(hydroxyl)[2.80]	(1,1)	3	3	4	3	1	0	0	0	1		tWS
3v7e.cif1	intra	56	151	C.A.93.	C.G.22.	C.C.30.	WC	19-XIX	cWW	cW-W	X	A|G-C	IP	S	S	LC	LC	SM	GCCAAUU	GAGGGAC	GGCCCGA	abAB	1,2,3,-2,-1,-3	2	SAM-I riboswitch aptamer with an engineered helix P3	SAM-I riboswitch aptamer with an engineered helix P3	SAM-I riboswitch aptamer with an engineered helix P3	caldanaerobacter subterraneus	caldanaerobacter subterraneus	caldanaerobacter subterraneus	N6(amino)*N2(amino)[2.96]	N6(amino)-O2(carbonyl)[3.13]_N1-O2'(hydroxyl)[3.07]	(2,2)	3	4	3	3	0	0	0	0	0	cH.	cWS
3v7e.cif1	intra	56	151	C.A.94.	C.G.23.	C.C.29.	WC	19-XIX	cWW	cW-W	X	A|G-C	IP	S	S	LC	LC	SM	CCAAUUC	AGGGACU	UGGCCCG	abAB	1,2,3,-2,-1,-3	2	SAM-I riboswitch aptamer with an engineered helix P3	SAM-I riboswitch aptamer with an engineered helix P3	SAM-I riboswitch aptamer with an engineered helix P3	caldanaerobacter subterraneus	caldanaerobacter subterraneus	caldanaerobacter subterraneus	N6(amino)-O2'(hydroxyl)[3.14]_N6(amino)-N3[2.92]_N1-N2(amino)[2.47]		(2,2)	3	4	3	3	0	0	0	0	0	tWS
419d.cif1	inter	0	152	B.A.15.	C.U.20.	D.A.27.	WC	20-XX	cWW	cW-W	X	A|U-A	HC	S	S	LR	LR	SM	UACAMNN	GUAUACA	NGUAUAC				DNA/RNA (5'-R(*GP*UP*AP*UP*AP*CP*A)-D(P*C)-3')	DNA/RNA (5'-R(*GP*UP*AP*UP*AP*CP*A)-D(P*C)-3')	DNA/RNA (5'-R(*GP*UP*AP*UP*AP*CP*A)-D(P*C)-3')	unspecified	unspecified	unspecified		N1-O2'(hydroxyl)[2.92]	(1,1)	3	2	6	6	0	0	0	0	0
4aob.cif1	intra	0	153	A.A.12.	A.G.43.	A.C.59.	WC	19-XIX	cWW	cW-W	I	A|G-C	JI	S	S	LR	LR	SM	AAGAGAG	CCGGCAA	GUGCCAA				SAM-I RIBOSWITCH	SAM-I RIBOSWITCH	SAM-I RIBOSWITCH	thermoanaerobacter tengcongensis	thermoanaerobacter tengcongensis	thermoanaerobacter tengcongensis	O2'(hydroxyl)-O2'(hydroxyl)[2.87]_N3-N2(amino)[3.12]	N1-O2'(hydroxyl)[2.93]	(1,1)	3	6	3	3	1	0	0	0	1	cSS		Multi Loop	Stem
4aob.cif1	intra	57	154	A.A.36.	A.G.21.	A.U.31.	WB	28-XXVIII	cWW	cW-W	X	A|G-U	ICIP	S	S	LC	LC	SM	AUGACCC	CAAGAGA	GCUUGAU	abAB	1,2,3,-2,-1,-3	2	SAM-I RIBOSWITCH	SAM-I RIBOSWITCH	SAM-I RIBOSWITCH	thermoanaerobacter tengcongensis	thermoanaerobacter tengcongensis	thermoanaerobacter tengcongensis	N1-O2'(hydroxyl)[2.63]_N3-N2(amino)[2.74]		(3,3)	4	6	3	3	0	0	1	0	1	tSS
4aob.cif1	intra	57	154	A.A.61.	A.A.22.	A.U.30.	WC	20-XX	cWW	cW-W	X	A|A-U	IP	S	S	LC	LC	SM	GCCAAUU	AAGAGAC	GGCUUGA	abAB	1,2,3,-2,-1,-3	2	SAM-I RIBOSWITCH	SAM-I RIBOSWITCH	SAM-I RIBOSWITCH	thermoanaerobacter tengcongensis	thermoanaerobacter tengcongensis	thermoanaerobacter tengcongensis		N6(amino)-O2(carbonyl)[3.01]_N1-O2'(hydroxyl)[2.52]	(3,3)	4	4	3	3	0	0	0	0	0		cWS
4aob.cif1	intra	57	154	A.A.62.	A.G.23.	A.C.29.	WC	19-XIX	cWW	cW-W	X	A|G-C	IP	S	S	LC	LC	SM	CCAAUUC	AGAGACU	UGGCUUG	abAB	1,2,3,-2,-1,-3	2	SAM-I RIBOSWITCH	SAM-I RIBOSWITCH	SAM-I RIBOSWITCH	thermoanaerobacter tengcongensis	thermoanaerobacter tengcongensis	thermoanaerobacter tengcongensis	N6(amino)-O2'(hydroxyl)[3.31]_N6(amino)-N3[3.14]_N1-N2(amino)[3.33]		(3,3)	4	4	3	3	0	0	0	0	0	tWS
4ato.cif1	intra	0	155	G.A.22.	G.G.7.	G.C.18.	WC	19-XIX	cWW	cW-W	I	A|G-C	HP	S	S	LC	LC	SM	CGUAGUA	UUGGUGU	UUACCGU	abAB	1,2,-1,-2	1	TOXI	TOXI	TOXI	bacillus thuringiensis	bacillus thuringiensis	bacillus thuringiensis	N1-O2'(hydroxyl)[2.60]_N3-N2(amino)[3.03]	O2'(hydroxyl)-O2'(hydroxyl)[2.64]_O2'(hydroxyl)-O2(carbonyl)[2.92]	(1,1)	3	5	3	3	0	1	0	0	1	tSS
4b3r.cif1	inter	58	156	A.A.1492.	W.U.2.	Z.A.35.	WC	20-XX	cWW	cW-W	II	A|U-A	IC	S	S	LR	LR	SM	GCGAAGU	NNUUCAA	UUGAAAA	abAB	1,2,-1,-2	1	16S RIBOSOMAL RNA	5'-R(*UP*UP*CP*AP*AP*AP)-3'	5'-R(*GP*GP*GP*AP*UP*UP*GP*AP*AP*AP*AP*UP*CP*CP*CP-3'	thermus thermophilus	thermus thermophilus	thermus thermophilus	N3-O2'(hydroxyl)[2.83]		(2,2)	3	4	3	3	1	0	0	0	1
4b3r.cif1	inter	58	156	A.A.1493.	W.U.1.	Z.A.36.	WC	20-XX	cWW	cW-W	I	A|U-A	IC	S	S	LR	LR	SM	CGAAGUC	NNNUUCA	UGAAAAU	abAB	1,2,-1,-2	1	16S RIBOSOMAL RNA	5'-R(*UP*UP*CP*AP*AP*AP)-3'	5'-R(*GP*GP*GP*AP*UP*UP*GP*AP*AP*AP*AP*UP*CP*CP*CP-3'	thermus thermophilus	thermus thermophilus	thermus thermophilus	O2'(hydroxyl)-O2'(hydroxyl)[2.84]_O2'(hydroxyl)-O2(carbonyl)[3.05]	N1-O2'(hydroxyl)[2.72]	(2,2)	3	4	3	3	0	0	0	0	0
4c9d.cif1	intra	0	157	D.A.24.	D.C.21.	D.G.25.	WC	19-XIX	cWW	cW-W	X	A|C-G	HC	S	S	LC	LC	SM	CGUAGAG	CCUCGUA	GUAGAGM				R3 REPEAT RNA CLEAVAGE PRODUCT	R3 REPEAT RNA CLEAVAGE PRODUCT	R3 REPEAT RNA CLEAVAGE PRODUCT	thermus thermophilus	thermus thermophilus	thermus thermophilus	N6(amino)-O2(carbonyl)[3.13]	O2'(hydroxyl)-OP2[2.27]	(1,1)	3	3	4	4	0	0	0	0	0
4enc.cif1	intra	59	158	A.A.20.	A.G.2.	A.C.17.	WC	19-XIX	cWW	cW-W	II	A|G-C	IP	S	S	LC	LC	SM	CCAAACU	NNGGGCG	CGCCCAA	abAB	1,2,-1,-2	1	Fluoride riboswitch	Fluoride riboswitch	Fluoride riboswitch	thermotoga petrophila	thermotoga petrophila	thermotoga petrophila		O2'(hydroxyl)-O2'(hydroxyl)[2.69]_N3-O2'(hydroxyl)[2.86]	(2,2)	3	6	4	4	0	0	0	0	0		cSS
4enc.cif1	intra	59	158	A.A.21.	A.G.3.	A.C.16.	WC	19-XIX	cWW	cW-W	I	A|G-C	IP	S	S	LC	LC	SM	CAAACUG	NGGGCGA	CCGCCCA	abAB	1,2,-1,-2	1	Fluoride riboswitch	Fluoride riboswitch	Fluoride riboswitch	thermotoga petrophila	thermotoga petrophila	thermotoga petrophila	N1-O2'(hydroxyl)[2.71]_N3-N2(amino)[2.97]	O2'(hydroxyl)-O2'(hydroxyl)[2.82]	(2,2)	3	6	4	4	0	0	0	0	0	tWS
4far.cif1	intra	0	159	A.A.49.	A.G.169.	A.C.197.	WC	19-XIX	cWW	cW-W	I	A|G-C	HP	S	S	LR	LR	SM	GUGAAGG	AAUGGAU	GUCCUUU	abcBdefECDAF	1,2,3,4,-3,5,6,7,8,9,10,11,12,-11,-10,-4,-9,-8,-7,-6,-5,-2,-1,-12	10	Group IIC intron	Group IIC intron	Group IIC intron	oceanobacillus iheyensis	oceanobacillus iheyensis	oceanobacillus iheyensis	O3'-O2'(hydroxyl)[2.64]_O2'(hydroxyl)-O2'(hydroxyl)[2.86]_O2'(hydroxyl)-N3[2.84]_N3-N2(amino)[2.96]		(1,1)	3	3	4	4	1	0	0	0	1
4far.cif1	intra	60	160	A.A.67.	A.C.23.	A.G.248.	WC	19-XIX	cWW	cW-W	I	A|C-G	JP	S	S	LR	LR	SM	GUUAGCC	AGUCUAU	AAAGACU	abcBdefECDAF	1,2,3,4,-3,5,6,7,8,9,10,11,12,-11,-10,-4,-9,-8,-7,-6,-5,-2,-1,-12	2	Group IIC intron	Group IIC intron	Group IIC intron	oceanobacillus iheyensis	oceanobacillus iheyensis	oceanobacillus iheyensis	O2'(hydroxyl)-O2(carbonyl)[3.10]	N1-O2'(hydroxyl)[2.66]_N3-N2(amino)[2.93]	(2,2)	4	2	11	11	0	0	0	0	0		tSS
4far.cif1	intra	0	161	A.A.93.	A.C.272.	A.G.281.	WC	19-XIX	cWW	cW-W	I	A|C-G	HC	S	S	LR	LR	SM	GCGACAU	GGUCUGG	ACAGAAG				Group IIC intron	Group IIC intron	Group IIC intron	oceanobacillus iheyensis	oceanobacillus iheyensis	oceanobacillus iheyensis	O2'(hydroxyl)-O2'(hydroxyl)[2.75]	N1-O2'(hydroxyl)[2.68]_N3-N2(amino)[2.93]	(1,1)	3	4	4	4	1	0	0	0	1		tWS
4far.cif1	intra	0	162	A.A.106.	A.C.367.	A.G.374.	WC	19-XIX	cWW	cW-W	I	A|C-G	IC	S	S	LR	LR	SM	UGAAGGA	AUACCGA	ACGGUAC				Group IIC intron	Group IIC intron	Group IIC intron	oceanobacillus iheyensis	oceanobacillus iheyensis	oceanobacillus iheyensis	O2'(hydroxyl)-O2'(hydroxyl)[2.88]_O2'(hydroxyl)-O2(carbonyl)[3.05]	N1-O2'(hydroxyl)[2.71]_N3-N2(amino)[2.95]	(1,1)	3	7	3	3	0	0	0	0	0		tSS
4far.cif1	intra	60	160	A.A.121.	A.U.24.	A.A.247.	WC	20-XX	cWW	cW-W	X	A|U-A	JP	S	S	LR	LR	SM	GCAAACC	GUCUAUA	GAAAGAC	abcBdefECDAF	1,2,3,4,-3,5,6,7,8,9,10,11,12,-11,-10,-4,-9,-8,-7,-6,-5,-2,-1,-12	2	Group IIC intron	Group IIC intron	Group IIC intron	oceanobacillus iheyensis	oceanobacillus iheyensis	oceanobacillus iheyensis	N6(amino)-O2(carbonyl)[3.13]		(2,2)	4	3	11	11	1	0	0	0	1	tH.
4far.cif1	intra	61	163	A.A.134.	A.C.360.	A.G.383.	WC	19-XIX	cWW	cW-W	II	A|C-G	BCJP	S	S	LR	LR	SM	CUGAGGA	CCGCCGU	ACGGUGG				Group IIC intron	Group IIC intron	Group IIC intron	oceanobacillus iheyensis	oceanobacillus iheyensis	oceanobacillus iheyensis	O2'(hydroxyl)-O3'[3.29]_O2'(hydroxyl)-O2'(hydroxyl)[3.05]_N3-O2'(hydroxyl)[2.83]		(2,2)	3	11	10	10	0	0	0	0	0
4far.cif1	intra	61	163	A.A.143.	A.C.361.	A.G.382.	WC	19-XIX	cWW	cW-W	X	A|C-G	BCJP	S	S	LR	LR	SM	ACGAACU	CGCCGUA	UACGGUG				Group IIC intron	Group IIC intron	Group IIC intron	oceanobacillus iheyensis	oceanobacillus iheyensis	oceanobacillus iheyensis	N6(amino)-O2(carbonyl)[3.29]_N1-O2'(hydroxyl)[3.01]		(2,2)	3	11	10	10	0	0	0	0	0	cWS
4far.cif1	intra	0	164	A.A.154.	A.A.149.	A.U.225.	WC	20-XX	cWW	cW-W	I	A|A-U	ICJP	S	S	LC	LC	SM	AUGAGGC	UUCAUAU	AAAUGAA	abcBdefECDAF	1,2,3,4,-3,5,6,7,8,9,10,11,12,-11,-10,-4,-9,-8,-7,-6,-5,-2,-1,-12	7	Group IIC intron	Group IIC intron	Group IIC intron	oceanobacillus iheyensis	oceanobacillus iheyensis	oceanobacillus iheyensis	O2'(hydroxyl)-O2'(hydroxyl)[3.25]	N1-O2'(hydroxyl)[2.66]	(1,1)	3	6	5	5	0	0	0	0	0		tWS
4far.cif1	intra	62	165	A.A.192.	A.C.127.	A.G.239.	WC	19-XIX	cWW	cW-W	X	A|C-G	ICJP	S	S	LC	LC	SM	ACAAAGU	CUUCGGU	GAUGAAG	abcBdefECDAF	1,2,3,4,-3,5,6,7,8,9,10,11,12,-11,-10,-4,-9,-8,-7,-6,-5,-2,-1,-12	5	Group IIC intron	Group IIC intron	Group IIC intron	oceanobacillus iheyensis	oceanobacillus iheyensis	oceanobacillus iheyensis		N6(amino)-O2'(hydroxyl)[2.90]_N1-O2'(hydroxyl)[2.57]	(2,1)	3	3	6	6	0	0	0	0	0
4far.cif1	intra	62	165	A.A.193.	A.C.127.	A.G.239.	WC	19-XIX	cWW	cW-W	I	A|C-G	ICJP	S	S	LC	LC	SM	CAAAGUC	CUUCGGU	GAUGAAG	abcBdefECDAF	1,2,3,4,-3,5,6,7,8,9,10,11,12,-11,-10,-4,-9,-8,-7,-6,-5,-2,-1,-12	5	Group IIC intron	Group IIC intron	Group IIC intron	oceanobacillus iheyensis	oceanobacillus iheyensis	oceanobacillus iheyensis	O2'(hydroxyl)-O2'(hydroxyl)[2.57]_O2'(hydroxyl)-O2(carbonyl)[2.90]	N3-N2(amino)[3.26]	(2,1)	3	3	6	6	0	0	0	0	0		tSS
4far.cif1	intra	0	166	A.A.260.	A.U.365.	A.G.378.	WB	28-XXVIII	cWW	cW-W	X	A|U-G	ICJP	S	S	LC	LC	SM	CUUACCC	GUAUACC	UACGUAC				Group IIC intron	Group IIC intron	Group IIC intron	oceanobacillus iheyensis	oceanobacillus iheyensis	oceanobacillus iheyensis		N7-N2(amino)[3.20]_N6(amino)-O2'(hydroxyl)[2.66]_N6(amino)-N3[3.23]	(1,1)	3	4	10	10	0	0	1	0	1		tHS
4far.cif1	intra	63	167	A.A.318.	A.C.7.	A.G.265.	WC	19-XIX	cWW	cW-W	II	A|C-G	IC	S	S	LR	LR	SM	GGGAAGG	UGCCCGG	CCGGGGA	abcBdefECDAF	1,2,3,4,-3,5,6,7,8,9,10,11,12,-11,-10,-4,-9,-8,-7,-6,-5,-2,-1,-12	1	Group IIC intron	Group IIC intron	Group IIC intron	oceanobacillus iheyensis	oceanobacillus iheyensis	oceanobacillus iheyensis	O2'(hydroxyl)-O2'(hydroxyl)[2.95]_N3-O2'(hydroxyl)[3.09]		(2,2)	3	4	5	5	1	0	0	0	1
4far.cif1	intra	63	167	A.A.319.	A.C.6.	A.G.266.	WC	19-XIX	cWW	cW-W	I	A|C-G	IC	S	S	LR	LR	SM	GGAAGGA	GUGCCCG	CGGGGAG	abcBdefECDAF	1,2,3,4,-3,5,6,7,8,9,10,11,12,-11,-10,-4,-9,-8,-7,-6,-5,-2,-1,-12	1	Group IIC intron	Group IIC intron	Group IIC intron	oceanobacillus iheyensis	oceanobacillus iheyensis	oceanobacillus iheyensis	O3'-O2'(hydroxyl)[3.06]_O2'(hydroxyl)-O2'(hydroxyl)[2.76]_O2'(hydroxyl)-O2(carbonyl)[2.86]	N1-O2'(hydroxyl)[2.94]_N3-N2(amino)[2.98]	(2,2)	3	4	5	5	1	0	0	0	1		tSS
4fen.cif1	intra	0	168	B.A.23.	B.G.46.	B.C.53.	WC	19-XIX	cWW	cW-W	X	A|G-C	II	HP	HP	LR	LR	SM	UAUAUAC	CGAGUUU	CUACCGG				A24U/U25A/A46G mutant of the B. subtilis xpt-pbuX guanine riboswitch aptamer domain	A24U/U25A/A46G mutant of the B. subtilis xpt-pbuX guanine riboswitch aptamer domain	A24U/U25A/A46G mutant of the B. subtilis xpt-pbuX guanine riboswitch aptamer domain	unspecified	unspecified	unspecified	N6(amino)-O2'(hydroxyl)[3.01]_N6(amino)-N3[3.01]_N1-N2(amino)[3.01]		(1,1)	2	4	9	9	0	0	0	0	0	tWS
4fen.cif1	intra	64	169	B.A.33.	B.G.37.	B.C.61.	WC	19-XIX	cWW	cW-W	II	A|G-C	HP	S	S	LC	LC	SM	UGGAUAU	UAUGGCA	CACCGUA	abAcBC	1,2,-1,3,-2,-3	2	A24U/U25A/A46G mutant of the B. subtilis xpt-pbuX guanine riboswitch aptamer domain	A24U/U25A/A46G mutant of the B. subtilis xpt-pbuX guanine riboswitch aptamer domain	A24U/U25A/A46G mutant of the B. subtilis xpt-pbuX guanine riboswitch aptamer domain	unspecified	unspecified	unspecified	O2'(hydroxyl)-O2'(hydroxyl)[2.73]_N3-O2'(hydroxyl)[2.70]		(3,2)	4	5	2	2	0	0	0	0	0
4fen.cif1	intra	64	169	B.A.65.	B.G.37.	B.C.61.	WC	19-XIX	cWW	cW-W	X	A|G-C	HP	S	S	LC	LC	SM	GUAAAUG	UAUGGCA	CACCGUA	abAcBC	1,2,-1,3,-2,-3	2	A24U/U25A/A46G mutant of the B. subtilis xpt-pbuX guanine riboswitch aptamer domain	A24U/U25A/A46G mutant of the B. subtilis xpt-pbuX guanine riboswitch aptamer domain	A24U/U25A/A46G mutant of the B. subtilis xpt-pbuX guanine riboswitch aptamer domain	unspecified	unspecified	unspecified		N6(amino)-O2(carbonyl)[3.11]_N1-O2'(hydroxyl)[2.64]	(3,2)	4	5	2	2	1	0	0	0	1		cWS
4fen.cif1	intra	64	169	B.A.66.	B.G.38.	B.C.60.	WC	19-XIX	cWW	cW-W	X	A|G-C	HP	S	S	LC	LC	SM	UAAAUGU	AUGGCAC	GCACCGU	abAcBC	1,2,-1,3,-2,-3	2	A24U/U25A/A46G mutant of the B. subtilis xpt-pbuX guanine riboswitch aptamer domain	A24U/U25A/A46G mutant of the B. subtilis xpt-pbuX guanine riboswitch aptamer domain	A24U/U25A/A46G mutant of the B. subtilis xpt-pbuX guanine riboswitch aptamer domain	unspecified	unspecified	unspecified	N6(amino)-N3[3.31]_N1-N2(amino)[2.89]		(3,2)	4	5	2	2	0	0	0	0	0	tWS
4frg.cif1	intra	65	170	B.A.21.	B.A.43.	B.U.54.	WC	20-XX	cWW	cW-W	X	A|A-U	JI	S	S	LR	LR	SM	GGAAAGU	CAGAUGC	GCAUACG				cobalamin riboswitch aptamer domain	cobalamin riboswitch aptamer domain	cobalamin riboswitch aptamer domain	metagenome	metagenome	metagenome	O2'(hydroxyl)-O2'(hydroxyl)[3.09]_N3-O2'(hydroxyl)[2.78]		(2,2)	5	6	4	4	1	0	0	0	1
4frg.cif1	intra	65	170	B.A.22.	B.G.42.	B.C.64.	WC	19-XIX	cWW	cW-W	I	A|G-C	JI	S	S	LC	LC	SM	GAAAGUG	CCAGAUG	AUACUCC	abAB	1,2,-1,-2	1	cobalamin riboswitch aptamer domain	cobalamin riboswitch aptamer domain	cobalamin riboswitch aptamer domain	metagenome	metagenome	metagenome	O2'(hydroxyl)-O2'(hydroxyl)[2.61]_N3-N2(amino)[3.39]	N1-O2'(hydroxyl)[2.79]	(2,2)	5	6	2	2	1	0	0	0	1	cSS	tWS
4jf2.cif1	intra	0	171	A.A.52.	A.C.22.	A.G.49.	WC	19-XIX	cWW	cW-W	X	A|C-G	IP	S	S	LC	LC	SM	GUUAUUA	CCACGAC	GUCGUUA	abAB	1,2,-1,-2	1	PreQ1-II Riboswitch	PreQ1-II Riboswitch	PreQ1-II Riboswitch	lactobacillus rhamnosus	lactobacillus rhamnosus	lactobacillus rhamnosus	N6(amino)-O2(carbonyl)[3.46]		(1,1)	3	6	8	8	0	1	0	0	1	tW.
4jf2.cif1	intra	0	172	A.A.55.	A.U.40.	A.A.71.	WC	20-XX	cWW	cW-W	I	A|U-A	IP	S	S	LC	LC	SM	AUUACUG	CCUUUGA	ACAAAGG	abAB	1,2,-1,-2	2	PreQ1-II Riboswitch	PreQ1-II Riboswitch	PreQ1-II Riboswitch	lactobacillus rhamnosus	lactobacillus rhamnosus	lactobacillus rhamnosus	O2'(hydroxyl)-O2'(hydroxyl)[2.68]	N1-O2'(hydroxyl)[2.69]	(1,1)	3	6	5	5	0	1	1	0	1
4kzd.cif1	intra	0	173	R.A.39.	R.G.37.	R.C.43.	WC	19-XIX	cWW	cW-W	X	A|G-C	HC	S	S	LC	LC	SM	CGAAACA	UGCGAAA	ACACGCA				RNA (84-MER)	RNA (84-MER)	RNA (84-MER)	unspecified	unspecified	unspecified	O2'(hydroxyl)-O6(carbonyl)[2.57]		(1,1)	3	5	7	7	1	1	0	0	1
4l81.cif1	intra	0	174	A.A.9.	A.G.23.	A.C.49.	WC	19-XIX	cWW	cW-W	I	A|G-C	JC	S	S	LC	LC	SM	ACGAGGG	CCGGCAA	GUGCUCA	abAB	1,2,3,4,5,-4,-3,-2,-1,-5	2	SAM-I/IV variant riboswitch aptamer domain	SAM-I/IV variant riboswitch aptamer domain	SAM-I/IV variant riboswitch aptamer domain	unspecified	unspecified	unspecified	O2'(hydroxyl)-O2'(hydroxyl)[2.99]_N3-N2(amino)[2.72]	N1-O2'(hydroxyl)[2.69]	(1,1)	3	4	3	3	0	0	0	0	0	cSS	tWS	Multi Loop	Stem
4l81.cif1	intra	66	175	A.A.86.	A.U.29.	A.A.44.	WC	20-XX	cWW	cW-W	I	A|U-A	JP	S	S	LC	LC	SM	GCAACGA	ACCUGGG	CCAAGGU	abAB	1,2,3,4,5,-4,-3,-2,-1,-5	3	SAM-I/IV variant riboswitch aptamer domain	SAM-I/IV variant riboswitch aptamer domain	SAM-I/IV variant riboswitch aptamer domain	unspecified	unspecified	unspecified	N1-O2'(hydroxyl)[2.58]	O2'(hydroxyl)-O2'(hydroxyl)[2.65]_O2'(hydroxyl)-N3[2.56]	(3,3)	5	7	3	3	1	0	0	0	1
4l81.cif1	intra	66	175	A.A.89.	A.G.30.	A.C.42.	WC	19-XIX	cWW	cW-W	II	A|G-C	JP	S	S	LC	LC	SM	ACGAAGU	CCUGGGA	ACCCAAG	abAB	1,2,3,4,5,-4,-3,-2,-1,-5	4	SAM-I/IV variant riboswitch aptamer domain	SAM-I/IV variant riboswitch aptamer domain	SAM-I/IV variant riboswitch aptamer domain	unspecified	unspecified	unspecified		O2'(hydroxyl)-O3'[2.85]_O2'(hydroxyl)-O2'(hydroxyl)[2.77]_N3-O2'(hydroxyl)[2.56]	(3,3)	5	7	3	3	0	0	0	0	0
4l81.cif1	intra	66	175	A.A.90.	A.G.31.	A.C.41.	WC	19-XIX	cWW	cW-W	I	A|G-C	JP	S	S	LC	LC	SM	CGAAGUC	CUGGGAC	CACCCAA	abAB	1,2,3,4,5,-4,-3,-2,-1,-5	4	SAM-I/IV variant riboswitch aptamer domain	SAM-I/IV variant riboswitch aptamer domain	SAM-I/IV variant riboswitch aptamer domain	unspecified	unspecified	unspecified	N1-O2'(hydroxyl)[2.77]_N3-N2(amino)[2.99]	O2'(hydroxyl)-O2'(hydroxyl)[3.01]_O2'(hydroxyl)-O2(carbonyl)[3.05]	(3,3)	5	7	3	3	0	0	0	0	0	tSS		Exterior Loop	Stem
4lvw.cif1	intra	67	176	A.A.22.	A.G.19.	A.C.66.	WC	19-XIX	cWW	cW-W	X	A|G-C	JC	S	S	LC	LC	SM	GUUAAGU	CGCGUUA	GCGCGGU	abAB	1,2,3,4,-3,-2,-1,-4	2	THF riboswitch	THF riboswitch	THF riboswitch	unspecified	unspecified	unspecified	N1-N2(amino)[2.98]_N3-O2'(hydroxyl)[2.67]		(3,3)	4	6	3	3	0	0	0	0	0	cWS
4lvw.cif1	intra	67	176	A.A.23.	A.C.18.	A.G.67.	WC	19-XIX	cWW	cW-W	X	A|C-G	JC	S	S	LC	LC	SM	UUAAGUG	UCGCGUU	CGCGGUG	abAB	1,2,3,4,-3,-2,-1,-4	2	THF riboswitch	THF riboswitch	THF riboswitch	unspecified	unspecified	unspecified		N1-N2(amino)[2.75]	(3,3)	4	6	3	3	0	0	0	0	0		tWS
4lvw.cif1	intra	67	176	A.A.56.	A.U.20.	A.G.65.	WB	28-XXVIII	cWW	cW-W	I	A|U-G	IPJC	S	S	LC	LC	SM	CGAAGCG	GCGUUAA	AGCGCGG	abAB	1,2,3,4,-3,-2,-1,-4	2	THF riboswitch	THF riboswitch	THF riboswitch	unspecified	unspecified	unspecified		N1-O2'(hydroxyl)[2.54]_N3-N2(amino)[3.08]	(3,3)	4	5	3	3	0	0	0	0	0		tSS
4lx6.cif1	intra	0	177	A.A.23.	A.G.46.	A.C.53.	WC	19-XIX	cWW	cW-W	X	A|G-C	II	HP	HP	LR	LR	SM	UAUAAUC	GGAGCUU	CCACCAA				Mutated adenine riboswitch aptamer	Mutated adenine riboswitch aptamer	Mutated adenine riboswitch aptamer	vibrio vulnificus	vibrio vulnificus	vibrio vulnificus	N6(amino)-N3[3.04]_N1-N2(amino)[2.94]		(1,1)	2	3	8	8	0	0	0	0	0	tWS
4lx6.cif1	intra	68	178	A.A.33.	A.G.37.	A.C.61.	WC	19-XIX	cWW	cW-W	II	A|G-C	HP	S	S	LC	LC	SM	AUGAUAU	UAUGGUU	AGCCUUA	abAcBC	1,2,-1,3,-2,-3	2	Mutated adenine riboswitch aptamer	Mutated adenine riboswitch aptamer	Mutated adenine riboswitch aptamer	vibrio vulnificus	vibrio vulnificus	vibrio vulnificus	O2'(hydroxyl)-O2'(hydroxyl)[2.76]_N3-O2'(hydroxyl)[2.74]		(3,2)	4	6	2	2	0	0	0	0	0
4lx6.cif1	intra	68	178	A.A.65.	A.G.37.	A.C.61.	WC	19-XIX	cWW	cW-W	X	A|G-C	HP	S	S	LC	LC	SM	UUAAACU	UAUGGUU	AGCCUUA	abAcBC	1,2,-1,3,-2,-3	2	Mutated adenine riboswitch aptamer	Mutated adenine riboswitch aptamer	Mutated adenine riboswitch aptamer	vibrio vulnificus	vibrio vulnificus	vibrio vulnificus	N6(amino)*N2(amino)[3.29]	N6(amino)-O2(carbonyl)[2.92]_N1-O2'(hydroxyl)[2.74]	(3,2)	4	5	2	2	0	0	0	0	0	cH.	cWS
4lx6.cif1	intra	68	178	A.A.66.	A.G.38.	A.C.60.	WC	19-XIX	cWW	cW-W	X	A|G-C	HP	S	S	LC	LC	SM	UAAACUC	AUGGUUU	GAGCCUU	abAcBC	1,2,-1,3,-2,-3	2	Mutated adenine riboswitch aptamer	Mutated adenine riboswitch aptamer	Mutated adenine riboswitch aptamer	vibrio vulnificus	vibrio vulnificus	vibrio vulnificus	N6(amino)-N3[3.29]_N1-N2(amino)[2.65]		(3,2)	4	5	2	2	0	0	0	0	0	tWS
4m4o.cif1	intra	0	179	B.A.31.	B.G.28.	B.C.39.	WC	19-XIX	cWW	cW-W	X	A|G-C	HC	HC	HC	SM	SM	SM	GUUACUU	AGAGUUA	GUUCACU				RNA (59-MER)	RNA (59-MER)	RNA (59-MER)	unspecified	unspecified	unspecified		N6(amino)-O2(carbonyl)[2.84]_N1-O2'(hydroxyl)[2.83]	(1,1)	1	14	14	14	0	0	1	0	1		cWS
4m6d.cif1	intra	0	180	H.A.31.	H.G.28.	H.C.39.	WC	19-XIX	cWW	cW-W	X	A|G-C	HC	HC	HC	SM	SM	SM	GUUACUU	AGAGUUA	GUUCACU				aptamer	aptamer	aptamer	unspecified	unspecified	unspecified		N6(amino)-O2(carbonyl)[3.32]_N1-O2'(hydroxyl)[2.77]	(1,1)	1	14	14	14	0	0	1	0	1		cWS
4oji.cif1	intra	69	181	A.A.39.	A.C.15.	A.G.19.	WC	19-XIX	cWW	cW-W	II	A|C-G	BIHP	HP	HP	LR	LR	SM	AUAAAAG	UGCCAAU	AAUGCCG				RNA (52-MER)	RNA (52-MER)	RNA (52-MER)	unspecified	unspecified	unspecified	O2'(hydroxyl)-O2'(hydroxyl)[2.89]_N3-O2'(hydroxyl)[2.59]		(2,2)	4	5	5	5	0	0	0	0	0	cWS	tW.
4oji.cif1	intra	69	181	A.A.40.	A.C.14.	A.G.30.	WC	19-XIX	cWW	cW-W	I	A|C-G	BIHP	S	S	LC	LC	SM	UAAAAGU	CUGCCAA	CAAGCCC	abcdBCAD	1,2,3,4,-2,-3,-1,-4	2	RNA (52-MER)	RNA (52-MER)	RNA (52-MER)	unspecified	unspecified	unspecified	O2'(hydroxyl)-O2'(hydroxyl)[2.62]_O2'(hydroxyl)-O2(carbonyl)[2.74]	N1-O2'(hydroxyl)[2.63]_N3-N2(amino)[2.90]	(2,2)	4	5	2	2	0	0	0	0	0		tSS
4p5j.cif1	intra	0	182	A.A.75.	A.C.59.	A.G.71.	WC	19-XIX	cWW	cW-W	I	A|C-G	HP	S	S	LC	LC	SM	GUCAUCG	CGCCCCU	GAGGGUC	abAB	1,2,-1,-2	1	Turnip yellow mosaic virus mRNA for the coat protein	Turnip yellow mosaic virus mRNA for the coat protein	Turnip yellow mosaic virus mRNA for the coat protein	turnip yellow mosaic virus	turnip yellow mosaic virus	turnip yellow mosaic virus	N1-O2'(hydroxyl)[2.56]	O2'(hydroxyl)-O2'(hydroxyl)[2.80]_O2'(hydroxyl)-N3[2.89]_N3-N2(amino)[2.89]	(1,1)	3	3	3	3	0	0	0	0	0		cSS
4p95.cif1	intra	70	183	A.A.2.	A.C.317.	A.G.322.	WC	19-XIX	cWW	cW-W	X	A|C-G	II	S	S	LR	LR	SM	NNCAUCC	GUCCUAA	AACGGCG				RNA (192-MER)	RNA (192-MER)	RNA (192-MER)	didymium iridis	didymium iridis	didymium iridis		N1-N2(amino)[3.27]_N3-O2'(hydroxyl)[2.75]	(2,2)	4	3	2	2	0	0	0	0	0		cWS
4p95.cif1	intra	71	184	A.A.275.	A.C.345.	A.G.543.	WC	19-XIX	cWW	cW-W	II	A|C-G	HPJC	S	S	LC	LC	SM	CUUAAUU	UGCCUCU	UUAGGUG				RNA (192-MER)	RNA (192-MER)	RNA (192-MER)	didymium iridis	didymium iridis	didymium iridis	O2'(hydroxyl)-O3'[3.09]_O2'(hydroxyl)-O2'(hydroxyl)[2.86]_N3-O2'(hydroxyl)[2.50]		(2,2)	3	6	3	3	0	0	0	0	0	cSS
4p95.cif1	intra	71	184	A.A.276.	A.C.344.	A.G.544.	WC	19-XIX	cWW	cW-W	I	A|C-G	HPJC	S	S	LC	LC	SM	UUAAUUG	CUGCCUC	UAGGUGU				RNA (192-MER)	RNA (192-MER)	RNA (192-MER)	didymium iridis	didymium iridis	didymium iridis	O2'(hydroxyl)-O2'(hydroxyl)[2.38]	N1-O2'(hydroxyl)[2.97]_N3-N2(amino)[3.12]	(2,2)	3	6	3	3	0	0	0	0	0		tSS
4p95.cif1	intra	70	183	A.A.286.	A.C.316.	A.G.323.	WC	19-XIX	cWW	cW-W	I	A|C-G	HPJP	S	S	LC	LC	SM	UAAAACG	CGUCCUA	ACGGCGA				RNA (192-MER)	RNA (192-MER)	RNA (192-MER)	didymium iridis	didymium iridis	didymium iridis	N1-O2'(hydroxyl)[2.65]		(2,2)	4	3	2	2	0	0	0	0	0		cSS
4p95.cif1	intra	72	185	A.A.307.	A.G.289.	A.C.313.	WC	19-XIX	cWW	cW-W	II	A|G-C	IC	S	S	LC	LC	SM	CGUAACA	AACGGUG	AUCCGUC	abAcdBDeCE	1,2,3,-2,-1,4,5,6,7,8,-3,-8,-7,9,-6,-5,-4,-9	7	RNA (192-MER)	RNA (192-MER)	RNA (192-MER)	didymium iridis	didymium iridis	didymium iridis		O2'(hydroxyl)-O2'(hydroxyl)[2.91]_N3-O2'(hydroxyl)[2.75]	(2,2)	3	7	4	4	1	1	1	0	1
4p95.cif1	intra	72	185	A.A.308.	A.G.290.	A.C.312.	WC	19-XIX	cWW	cW-W	I	A|G-C	IC	S	S	LC	LC	SM	GUAACAU	ACGGUGG	CAUCCGU	abAcdBDeCE	1,2,3,-2,-1,4,5,6,7,8,-3,-8,-7,9,-6,-5,-4,-9	7	RNA (192-MER)	RNA (192-MER)	RNA (192-MER)	didymium iridis	didymium iridis	didymium iridis	N1-O2'(hydroxyl)[2.73]_N3-N2(amino)[3.03]	O2'(hydroxyl)-O2'(hydroxyl)[2.77]_O2'(hydroxyl)-O2(carbonyl)[2.70]	(2,2)	3	7	4	4	1	1	1	0	1	tSS
4p95.cif1	intra	0	186	A.A.319.	A.U.282.	A.G.338.	WB	28-XXVIII	cWW	cW-W	X	A|U-G	HC	S	S	LR	LR	SM	CCUAACG	GGGUUAA	ACGGCCC	abAcdBDeCE	1,2,3,-2,-1,4,5,6,7,8,-3,-8,-7,9,-6,-5,-4,-9	6	RNA (192-MER)	RNA (192-MER)	RNA (192-MER)	didymium iridis	didymium iridis	didymium iridis		N1-N2(amino)[3.25]	(1,1)	3	4	5	5	0	0	1	0	1		cWS
4p95.cif1	intra	73	187	A.A.569.	A.A.19.	A.U.222.	WC	20-XX	cWW	cW-W	X	A|A-U	HC	S	S	LR	LR	SM	CCGAAAG	GACAAUC	GGUUGGG				RNA (192-MER)	RNA (192-MER)	RNA (192-MER)	didymium iridis	didymium iridis	didymium iridis	N6(amino)-N3[3.04]_N1-O2'(hydroxyl)[2.42]		(3,3)	5	4	5	5	1	0	0	0	1	cWS
4p95.cif1	intra	73	187	A.A.570.	A.C.18.	A.G.223.	WC	19-XIX	cWW	cW-W	X	A|C-G	HC	S	S	LR	LR	SM	CGAAAGG	AGACAAU	GUUGGGU				RNA (192-MER)	RNA (192-MER)	RNA (192-MER)	didymium iridis	didymium iridis	didymium iridis		N6(amino)-N3[3.19]_N1-N2(amino)[3.26]	(3,3)	5	4	5	5	1	0	0	0	1		tWS
4p95.cif1	intra	73	187	A.A.571.	A.A.17.	A.G.224.	IM	08-VIII	cWW	cW-W	X	A|A-G	HC	IC	IC	LR	LR	SM	GAAAGGA	AAGACAA	UUGGGUU				RNA (192-MER)	RNA (192-MER)	RNA (192-MER)	didymium iridis	didymium iridis	didymium iridis		N6(amino)-N3[3.02]_N1-N2(amino)[2.77]	(3,3)	5	4	2	2	1	0	0	0	1		tWS
4pdb.cif1	intra	0	188	I.A.26.	I.U.15.	I.A.24.	WC	20-XX	cWW	cW-W	X	A|U-A	BC	S	S	LC	LC	SM	GAUAUCA	UGAUCCU	GGGAUAU				SELEX RNA aptamer	SELEX RNA aptamer	SELEX RNA aptamer	synthetic	synthetic	synthetic	N6(amino)-O2(carbonyl)[2.90]		(1,1)	3	2	3	3	0	1	0	0	1	cW.
4pr6.cif1	intra	0	189	B.A.142.	B.C.121.	B.G.139.	WC	19-XIX	cWW	cW-W	X	A|C-G	JI	S	S	LC	LC	SM	GGCAACA	CCUCCUC	CUGGGCA	abcdCADB	1,2,3,4,-3,-1,-4,-2	4	HDV RIBOZYME SELF-CLEAVED	HDV RIBOZYME SELF-CLEAVED	HDV RIBOZYME SELF-CLEAVED	unspecified	unspecified	unspecified	N6(amino)-O2(carbonyl)[2.81]_N1-O2'(hydroxyl)[2.71]		(1,1)	3	4	2	2	1	1	0	0	1	cWS
4pr6.cif1	intra	74	190	B.A.165.	B.C.119.	B.G.128.	WC	19-XIX	cWW	cW-W	II	A|C-G	JI	S	S	LC	LC	SM	GCGAAUG	AGCCUCC	GCUGGCG	abcdCADB	1,2,3,4,-3,-1,-4,-2	3	HDV RIBOZYME SELF-CLEAVED	HDV RIBOZYME SELF-CLEAVED	HDV RIBOZYME SELF-CLEAVED	unspecified	unspecified	unspecified	O2'(hydroxyl)-O3'[3.28]_O2'(hydroxyl)-O2'(hydroxyl)[2.79]_N3-O2'(hydroxyl)[2.55]		(2,2)	3	5	3	3	1	0	0	0	1
4pr6.cif1	intra	74	190	B.A.166.	B.C.118.	B.G.129.	WC	19-XIX	cWW	cW-W	I	A|C-G	JI	S	S	LC	LC	SM	CGAAUGG	CAGCCUC	CUGGCGC	abcdCADB	1,2,3,4,-3,-1,-4,-2	3	HDV RIBOZYME SELF-CLEAVED	HDV RIBOZYME SELF-CLEAVED	HDV RIBOZYME SELF-CLEAVED	unspecified	unspecified	unspecified	O2'(hydroxyl)-O2'(hydroxyl)[2.63]_O2'(hydroxyl)-O2(carbonyl)[2.74]	N1-O2'(hydroxyl)[2.69]_N3-N2(amino)[3.06]	(2,2)	3	5	3	3	0	0	0	0	0		tSS	Exterior Loop	Stem
4prf.cif1	intra	0	191	B.A.142.	B.C.121.	B.G.139.	WC	19-XIX	cWW	cW-W	X	A|C-G	JI	S	S	LC	LC	SM	GGCAACA	CCUCCUC	CUGGGCA	abcdCADB	1,2,3,4,-3,-1,-4,-2	4	Hepatitis Delta virus ribozyme	Hepatitis Delta virus ribozyme	Hepatitis Delta virus ribozyme	unspecified	unspecified	unspecified	N6(amino)-O2(carbonyl)[2.66]_N1-O2'(hydroxyl)[2.86]		(1,1)	3	4	2	2	1	1	0	0	1	cWS
4prf.cif1	intra	75	192	B.A.165.	B.C.119.	B.G.128.	WC	19-XIX	cWW	cW-W	II	A|C-G	JI	S	S	LC	LC	SM	GUGAAUG	AGCCUCC	GCUGGCG	abcdCADB	1,2,3,4,-3,-1,-4,-2	3	Hepatitis Delta virus ribozyme	Hepatitis Delta virus ribozyme	Hepatitis Delta virus ribozyme	unspecified	unspecified	unspecified	O2'(hydroxyl)-O3'[3.44]_O2'(hydroxyl)-O2'(hydroxyl)[2.92]_N3-O2'(hydroxyl)[2.66]		(2,2)	3	5	3	3	1	0	0	0	1	cSS
4prf.cif1	intra	75	192	B.A.166.	B.C.118.	B.G.129.	WC	19-XIX	cWW	cW-W	I	A|C-G	JI	S	S	LC	LC	SM	UGAAUGG	CAGCCUC	CUGGCGC	abcdCADB	1,2,3,4,-3,-1,-4,-2	3	Hepatitis Delta virus ribozyme	Hepatitis Delta virus ribozyme	Hepatitis Delta virus ribozyme	unspecified	unspecified	unspecified	O2'(hydroxyl)-O2'(hydroxyl)[2.63]_O2'(hydroxyl)-O2(carbonyl)[2.63]	N1-O2'(hydroxyl)[2.75]_N3-N2(amino)[2.87]	(2,2)	3	5	3	3	0	0	0	0	0		tSS	Exterior Loop	Stem
4pwd.cif1	inter	0	193	T.A.715.A	T.G.714.	P.DC.814.	WC	19-XIX	cWW	cW-W	X	A|G-C	BC	S	S	LC	LC	SM	CGAAACA	CCCGAAA	MMMMMMM				5'-R(*AP*UP*GP*GP*UP*CP*GP*GP*CP*GP*CP*CP*CP*GP*AP*AP*AP*CP*AP*GP*GP*GP*AP*CP*UP*GP*U)-3'	5'-R(*AP*UP*GP*GP*UP*CP*GP*GP*CP*GP*CP*CP*CP*GP*AP*AP*AP*CP*AP*GP*GP*GP*AP*CP*UP*GP*U)-3'	5'-D(*A*CP*AP*GP*TP*CP*CP*CP*TP*GP*TP*TP*CP*GP*GP*GP*CP*GP*CP*CP*G)-3'	unspecified	unspecified	unspecified	N6(amino)-N3[2.45]_N1-N2(amino)[2.67]		(1,1)	3	1	9	9	1	1	0	0	1	tWS
4qlm.cif1	intra	76	194	A.A.10.	A.C.23.	A.G.105.	WC	19-XIX	cWW	cW-W	I	A|C-G	IC	S	S	LC	LC	SM	CUGAACC	GGGCGGG	CUCGCAA	abAB	1,2,3,4,5,-4,-3,-2,-1,-5	2	RNA (108-MER)	RNA (108-MER)	RNA (108-MER)	thermoanaerobacter tengcongensis	thermoanaerobacter tengcongensis	thermoanaerobacter tengcongensis		N1-O2'(hydroxyl)[2.66]_N3-N2(amino)[3.43]	(2,2)	3	13	6	6	0	0	0	0	0		tSS	Interior Loop	Stem
4qlm.cif1	intra	77	195	A.A.45.	A.G.68.	A.C.85.	WC	19-XIX	cWW	cW-W	I	A|G-C	JC	S	S	LC	LC	SM	GCGAAUC	GUAGGGU	ACCCGAG	abAB	1,2,3,4,5,-4,-3,-2,-1,-5	4	RNA (108-MER)	RNA (108-MER)	RNA (108-MER)	thermoanaerobacter tengcongensis	thermoanaerobacter tengcongensis	thermoanaerobacter tengcongensis	O2'(hydroxyl)-O2'(hydroxyl)[2.98]_O2'(hydroxyl)-N3[3.21]_N3-N2(amino)[2.64]	N1-O2'(hydroxyl)[2.90]	(2,2)	3	4	5	5	1	0	0	0	1	cSS
4qlm.cif1	intra	0	196	A.A.73.	A.C.5.	A.G.111.	WC	19-XIX	cWW	cW-W	X	A|C-G	HP	S	S	LR	LR	SM	GUUACUC	GAUCGCU	AGCGUCC	abAB	1,2,3,4,5,-4,-3,-2,-1,-5	1	RNA (108-MER)	RNA (108-MER)	RNA (108-MER)	thermoanaerobacter tengcongensis	thermoanaerobacter tengcongensis	thermoanaerobacter tengcongensis	N6(amino)-O2(carbonyl)[3.08]_N1-O2'(hydroxyl)[2.49]	N6(amino)*N2(amino)[3.40]	(1,1)	3	1	4	4	0	0	1	0	1	cWS
4qlm.cif1	intra	0	197	A.A.95.	A.G.40.	A.C.91.	WC	19-XIX	cWW	cW-W	X	A|G-C	HPIC	S	S	LC	LC	SM	GUCAGCU	AUGGGGC	GCCCGUC	abAB	1,2,3,4,5,-4,-3,-2,-1,-5	3	RNA (108-MER)	RNA (108-MER)	RNA (108-MER)	thermoanaerobacter tengcongensis	thermoanaerobacter tengcongensis	thermoanaerobacter tengcongensis	N7-N2(amino)[3.57]	N6(amino)-O2'(hydroxyl)[3.34]_N6(amino)-O2(carbonyl)[2.88]	(1,1)	3	9	4	4	0	0	0	0	0	cHS	tH.
4qlm.cif1	intra	77	195	A.2BA.203.	A.G.69.	A.C.84.	WC	19-XIX	cWW	cW-W	X	a|G-C	NA	S	S	NA	NA	SM	NGGAUCG	UAGGGUU	GACCCGA	abAB	1,2,3,4,5,-4,-3,-2,-1,-5	4	RNA (108-MER)	RNA (108-MER)	RNA (108-MER)	thermoanaerobacter tengcongensis	thermoanaerobacter tengcongensis	thermoanaerobacter tengcongensis	O2'(hydroxyl)-N2(amino)[3.30]_N1-O2'(hydroxyl)[2.49]_N3-N2(amino)[3.11]	O3'-O2'(hydroxyl)[2.70]_O2'(hydroxyl)-O2'(hydroxyl)[2.94]_O2'(hydroxyl)-O2(carbonyl)[2.16]	(2,2)	3	4	5	5	0	0	0	0	0	tS.
4qlm.cif1	intra	76	194	A.2BA.204.	A.G.24.	A.C.104.	WC	19-XIX	cWW	cW-W	I	a|G-C	NA	S	S	NA	NA	SM	GGAUCGC	GGCGGGG	CCUCGCA	abAB	1,2,3,4,5,-4,-3,-2,-1,-5	2	RNA (108-MER)	RNA (108-MER)	RNA (108-MER)	thermoanaerobacter tengcongensis	thermoanaerobacter tengcongensis	thermoanaerobacter tengcongensis	N1-O2'(hydroxyl)[2.70]_N3-N2(amino)[3.05]	O3'-O2'(hydroxyl)[2.84]_O2'(hydroxyl)-O2'(hydroxyl)[3.13]_O2'(hydroxyl)-O2(carbonyl)[2.17]	(2,2)	3	4	6	6	0	0	0	0	0	tS.
4rge.cif1	intra	78	198	C.A.42.	C.C.14.	C.G.25.	WC	19-XIX	cWW	cW-W	X	A|C-G	BIHP	S	S	LR	LR	SM	CCUAAUU	AGCCACA	UGUGAGG				env22 twister ribozyme	env22 twister ribozyme	env22 twister ribozyme	synthetic	synthetic	synthetic	N3-O2'(hydroxyl)[2.84]		(2,2)	5	3	6	6	0	0	0	0	0		tW.
4rge.cif1	intra	78	198	C.A.43.	C.C.13.	C.G.36.	WC	19-XIX	cWW	cW-W	I	A|C-G	BIHP	S	S	LC	LC	SM	CUAAUUC	AAGCCAC	UAAGCCC	abcdBCAD	1,2,3,4,-2,-3,-1,-4	2	env22 twister ribozyme	env22 twister ribozyme	env22 twister ribozyme	synthetic	synthetic	synthetic	O2'(hydroxyl)-O2'(hydroxyl)[2.87]_O2'(hydroxyl)-O2(carbonyl)[2.75]	N1-O2'(hydroxyl)[2.63]_N3-N2(amino)[2.85]	(2,2)	5	3	2	2	0	0	0	0	0		tSS
4rmo.cif1	intra	79	199	B.A.27.	B.C.8.	B.G.25.	WC	19-XIX	cWW	cW-W	X	A|C-G	HP	S	S	LC	LC	SM	GGUAUAU	UUACCAC	GUGGUAU	abAB	1,2,-1,-2	1	RNA (45-MER)	RNA (45-MER)	RNA (45-MER)	synthetic	synthetic	synthetic	N6(amino)-O2(carbonyl)[2.70]_N1-O2'(hydroxyl)[2.65]		(4,3)	3	9	5	5	0	0	0	0	0	tWS
4rmo.cif1	intra	79	199	B.A.29.	B.C.8.	B.G.25.	WC	19-XIX	cWW	cW-W	X	A|C-G	HP	S	S	LC	LC	SM	UAUAUAA	UUACCAC	GUGGUAU	abAB	1,2,-1,-2	1	RNA (45-MER)	RNA (45-MER)	RNA (45-MER)	synthetic	synthetic	synthetic		N6(amino)-N3[2.96]_N1-O2'(hydroxyl)[2.83]	(4,3)	3	9	5	5	0	0	0	0	0		cWS
4rmo.cif1	intra	79	199	B.A.29.	B.C.9.	B.G.24.	WC	19-XIX	cWW	cW-W	X	A|C-G	HP	S	S	LC	LC	SM	UAUAUAA	UACCACU	UGUGGUA	abAB	1,2,-1,-2	1	RNA (45-MER)	RNA (45-MER)	RNA (45-MER)	synthetic	synthetic	synthetic	N7-O2'(hydroxyl)[2.64]_N6(amino)-O2(carbonyl)[2.75]		(4,3)	3	9	5	5	0	0	0	0	0
4rmo.cif1	intra	79	199	B.A.31.	B.C.9.	B.G.24.	WC	19-XIX	cWW	cW-W	X	A|C-G	HP	S	S	LC	LC	SM	UAUAAAU	UACCACU	UGUGGUA	abAB	1,2,-1,-2	1	RNA (45-MER)	RNA (45-MER)	RNA (45-MER)	synthetic	synthetic	synthetic		N1-N2(amino)[3.14]	(4,3)	3	9	5	5	0	0	0	0	0		cWS
4rmo.cif1	intra	79	199	B.A.31.	B.A.10.	B.U.23.	WC	20-XX	cWW	cW-W	X	A|A-U	HP	S	S	LC	LC	SM	UAUAAAU	ACCACUG	AUGUGGU	abAB	1,2,-1,-2	1	RNA (45-MER)	RNA (45-MER)	RNA (45-MER)	synthetic	synthetic	synthetic	N6(amino)-O2'(hydroxyl)[3.15]_N6(amino)-N3[3.13]		(4,3)	3	9	5	5	0	0	0	0	0	tWS
4rmo.cif1	intra	79	199	B.A.33.	B.A.10.	B.U.23.	WC	20-XX	cWW	cW-W	X	A|A-U	HP	S	S	LC	LC	SM	UAAAUGG	ACCACUG	AUGUGGU	abAB	1,2,-1,-2	1	RNA (45-MER)	RNA (45-MER)	RNA (45-MER)	synthetic	synthetic	synthetic		O2'(hydroxyl)-O3'[2.66]_O2'(hydroxyl)-O2'(hydroxyl)[2.77]_N3-O2'(hydroxyl)[2.57]	(4,3)	3	9	5	5	0	0	0	0	0
4rzd.cif1	intra	0	200	A.A.52.	A.U.16.	A.A.85.	WC	20-XX	cWW	cW-W	I	A|U-A	JP	S	S	LC	LC	SM	GCCAAAC	AUUUUAG	UCAAAAU	abAB	1,2,-1,-2	2	PreQ1-III Riboswitch (Class 3)	PreQ1-III Riboswitch (Class 3)	PreQ1-III Riboswitch (Class 3)	faecalibacterium prausnitzii	faecalibacterium prausnitzii	faecalibacterium prausnitzii	O2'(hydroxyl)-O2'(hydroxyl)[3.19]	N1-O2'(hydroxyl)[2.74]	(1,1)	3	4	6	6	0	0	0	0	0
4ts2.cif1	inter	0	201	Y.A.84.	X.A.17.	Y.U.82.	WC	20-XX	cWW	cW-W	X	A|A-U	IC	S	S	LC	LC	SM	GUAACUG	GAAAUGG	CCGUAAC				Spinach aptamer RNA, bimolecular construct	Spinach aptamer RNA, bimolecular construct	Spinach aptamer RNA, bimolecular construct	synthetic	synthetic	synthetic	N6(amino)-N3[3.16]_N1-O2'(hydroxyl)[2.93]		(1,1)	3	4	4	4	1	0	1	0	1	cWS
4v88.cif1	intra	80	202	A6.A.47.	A6.U.98.	A6.A.385.	WC	20-XX	cWW	cW-W	X	A|U-A	JC	S	S	LR	LR	SM	UUAAGCC	GGCUCAU	CGGAGAG	abAcdeBEfDFC	1,2,3,4,5,6,7,8,9,10,11,-10,-9,-8,-7,-6,-5,-4,-3,-2,-1,12,13,14,15,16,17,18,-11,-18,-17,-16,-15,-14,19,20,21,-13,-21,-20,-19,-12	5	18S rRNA	18S rRNA	18S rRNA	saccharomyces cerevisiae	saccharomyces cerevisiae	saccharomyces cerevisiae	N7-O2'(hydroxyl)[2.94]_N6(amino)-O2(carbonyl)[2.92]		(3,2)	5	16	3	3	0	0	0	0	0	cHS
4v88.cif1	intra	0	203	A6.A.51.	A6.C.50.	A6.G.429.	WC	19-XIX	cWW	cW-W	X	A|C-G	BC	S	S	LC	LC	SM	GCCAUGC	AGCCAUG	GCAGGCG	abAcdeBEfDFC	1,2,3,4,5,6,7,8,9,10,11,-10,-9,-8,-7,-6,-5,-4,-3,-2,-1,12,13,14,15,16,17,18,-11,-18,-17,-16,-15,-14,19,20,21,-13,-21,-20,-19,-12	3	18S rRNA	18S rRNA	18S rRNA	saccharomyces cerevisiae	saccharomyces cerevisiae	saccharomyces cerevisiae	O5'-O2'(hydroxyl)[3.02]	N7-N2(amino)[2.74]_N6(amino)-N3[2.94]	(1,1)	3	1	3	3	0	0	0	0	0		tHS
4v88.cif1	intra	81	204	A6.A.61.	A6.G.269.	A6.C.286.	WC	19-XIX	cWW	cW-W	II	A|G-C	IC	S	S	LR	LR	SM	UCUAAGU	AUCGCAU	UGGCGAU				18S rRNA	18S rRNA	18S rRNA	saccharomyces cerevisiae	saccharomyces cerevisiae	saccharomyces cerevisiae	O2'(hydroxyl)-O2'(hydroxyl)[2.87]_N3-O2'(hydroxyl)[2.85]		(2,2)	3	4	4	4	0	0	0	0	0
4v88.cif1	intra	81	204	A6.A.62.	A6.C.268.	A6.G.287.	WC	19-XIX	cWW	cW-W	I	A|C-G	IC	S	S	LR	LR	SM	CUAAGUA	AAUCGCA	GGCGAUG				18S rRNA	18S rRNA	18S rRNA	saccharomyces cerevisiae	saccharomyces cerevisiae	saccharomyces cerevisiae	O2'(hydroxyl)-O2'(hydroxyl)[2.81]_O2'(hydroxyl)-O2(carbonyl)[3.23]	N1-O2'(hydroxyl)[3.42]	(2,2)	3	4	4	4	0	1	0	0	1		tSS
4v88.cif1	intra	80	202	A6.A.100.	A6.U.98.	A6.A.385.	WC	20-XX	cWW	cW-W	X	A|U-A	JC	S	S	LC	LC	SM	CUCAUUA	GGCUCAU	CGGAGAG	abAcdeBEfDFC	1,2,3,4,5,6,7,8,9,10,11,-10,-9,-8,-7,-6,-5,-4,-3,-2,-1,12,13,14,15,16,17,18,-11,-18,-17,-16,-15,-14,19,20,21,-13,-21,-20,-19,-12	5	18S rRNA	18S rRNA	18S rRNA	saccharomyces cerevisiae	saccharomyces cerevisiae	saccharomyces cerevisiae		N6(amino)-N3[2.88]_N1-O2'(hydroxyl)[2.81]	(3,2)	5	7	3	3	0	1	0	0	1		tWS
4v88.cif1	intra	0	205	A6.A.126.	A6.U.125.	A6.G.291.	-W	n/a	cWW	cW-W	X	A|U-G	JC	JC	JCJP	SM	SM	SM	GAUAGUU	UGAUAGU	AUGGUUC				18S rRNA	18S rRNA	18S rRNA	saccharomyces cerevisiae	saccharomyces cerevisiae	saccharomyces cerevisiae		N7-N2(amino)[3.16]_N6(amino)-O2'(hydroxyl)[2.87]_N6(amino)-N3[3.32]	(1,1)	2	24	24	4	0	0	0	0	0		tHS
4v88.cif1	intra	82	206	A6.A.147.	A6.U.64.	A6.A.86.	WC	20-XX	cWW	cW-W	II	A|U-A	JC	S	S	LR	LR	SM	UAUAACU	AAGUAUA	GAAACUG				18S rRNA	18S rRNA	18S rRNA	saccharomyces cerevisiae	saccharomyces cerevisiae	saccharomyces cerevisiae		O2'(hydroxyl)-O2'(hydroxyl)[2.43]_N3-O2'(hydroxyl)[3.02]	(3,2)	4	24	2	2	0	0	1	0	1
4v88.cif1	intra	83	207	A6.A.156.	A6.C.414.	A6.G.419.	WC	19-XIX	cWW	cW-W	X	A|C-G	HC	S	S	LR	LR	SM	GGUAAUU	CAUCCAA	AAGGAAG				18S rRNA	18S rRNA	18S rRNA	saccharomyces cerevisiae	saccharomyces cerevisiae	saccharomyces cerevisiae		N6(amino)-N3[3.10]_N1-N2(amino)[2.85]	(2,1)	3	5	2	2	1	0	0	0	1		tWS
4v88.cif1	intra	83	207	A6.A.157.	A6.C.414.	A6.G.419.	WC	19-XIX	cWW	cW-W	I	A|C-G	HC	S	S	LR	LR	SM	GUAAUUC	CAUCCAA	AAGGAAG				18S rRNA	18S rRNA	18S rRNA	saccharomyces cerevisiae	saccharomyces cerevisiae	saccharomyces cerevisiae		N1-O2'(hydroxyl)[2.91]	(2,1)	3	5	2	2	1	0	0	0	1
4v88.cif1	intra	82	206	A6.A.168.	A6.G.63.	A6.C.87.	WC	19-XIX	cWW	cW-W	X	A|G-C	JC	S	S	LR	LR	SM	GCUAAUA	UAAGUAU	AAACUGC				18S rRNA	18S rRNA	18S rRNA	saccharomyces cerevisiae	saccharomyces cerevisiae	saccharomyces cerevisiae		N1-O2'(hydroxyl)[3.28]	(3,2)	4	16	2	2	0	1	0	0	1
4v88.cif1	intra	82	206	A6.A.168.	A6.U.64.	A6.A.86.	WC	20-XX	cWW	cW-W	X	A|U-A	JC	S	S	LR	LR	SM	GCUAAUA	AAGUAUA	GAAACUG				18S rRNA	18S rRNA	18S rRNA	saccharomyces cerevisiae	saccharomyces cerevisiae	saccharomyces cerevisiae	O2'(hydroxyl)-O3'[3.46]_O2'(hydroxyl)-O2'(hydroxyl)[2.99]_N3-O2'(hydroxyl)[2.60]		(3,2)	4	16	2	2	0	1	0	0	1
4v88.cif1	intra	82	206	A6.A.169.	A6.G.63.	A6.C.87.	WC	19-XIX	cWW	cW-W	I	A|G-C	JC	S	S	LR	LR	SM	CUAAUAC	UAAGUAU	AAACUGC				18S rRNA	18S rRNA	18S rRNA	saccharomyces cerevisiae	saccharomyces cerevisiae	saccharomyces cerevisiae	O3'-O2'(hydroxyl)[3.22]_N3-N2(amino)[3.25]	N1-O2'(hydroxyl)[2.66]	(3,2)	4	16	2	2	0	1	0	0	1
4v88.cif1	intra	0	208	A6.A.217.	A6.U.828.	A6.A.844.	WC	20-XX	cWW	cW-W	X	A|U-A	HP	S	S	LR	LR	SM	GAUAAAA	UUCUAUU	UCUAGGA	abAcdeBEfDFC	1,2,3,4,5,6,7,8,9,10,11,-10,-9,-8,-7,-6,-5,-4,-3,-2,-1,12,13,14,15,16,17,18,-11,-18,-17,-16,-15,-14,19,20,21,-13,-21,-20,-19,-12	18	18S rRNA	18S rRNA	18S rRNA	saccharomyces cerevisiae	saccharomyces cerevisiae	saccharomyces cerevisiae		N7-O2'(hydroxyl)[3.06]_N6(amino)-O2'(hydroxyl)[3.11]_N6(amino)-N3[3.17]	(1,1)	3	6	6	6	0	0	0	0	0		cHS
4v88.cif1	intra	0	209	A6.A.333.	A6.U.116.	A6.A.300.	WC	20-XX	cWW	cW-W	II	A|U-A	HC	S	S	LR	LR	SM	GAUAGUG	UCGUUUA	UCAAAUU	abAcdeBEfDFC	1,2,3,4,5,6,7,8,9,10,11,-10,-9,-8,-7,-6,-5,-4,-3,-2,-1,12,13,14,15,16,17,18,-11,-18,-17,-16,-15,-14,19,20,21,-13,-21,-20,-19,-12	8	18S rRNA	18S rRNA	18S rRNA	saccharomyces cerevisiae	saccharomyces cerevisiae	saccharomyces cerevisiae	O2'(hydroxyl)-O3'[2.94]_O2'(hydroxyl)-O2'(hydroxyl)[2.51]_N3-O2'(hydroxyl)[2.86]		(1,1)	3	7	2	2	0	0	0	0	0
4v88.cif1	intra	0	210	A6.A.353.	A6.A.316.	A6.U.348.	WC	20-XX	cWW	cW-W	I	A|A-U	IC	S	S	LC	LC	SM	UCAACGG	UCAACUU	UGGUUUC				18S rRNA	18S rRNA	18S rRNA	saccharomyces cerevisiae	saccharomyces cerevisiae	saccharomyces cerevisiae	N1-O2'(hydroxyl)[2.82]	O2'(hydroxyl)-O2'(hydroxyl)[2.83]_O2'(hydroxyl)-O2(carbonyl)[3.23]	(1,1)	3	6	3	3	0	0	0	0	0
4v88.cif1	intra	80	202	A6.A.425.	A6.C.97.	A6.G.386.	WC	19-XIX	cWW	cW-W	I	A|C-G	JCJP	S	S	LC	LC	SM	GGCAGCA	UGGCUCA	GGAGAGG	abAcdeBEfDFC	1,2,3,4,5,6,7,8,9,10,11,-10,-9,-8,-7,-6,-5,-4,-3,-2,-1,12,13,14,15,16,17,18,-11,-18,-17,-16,-15,-14,19,20,21,-13,-21,-20,-19,-12	5	18S rRNA	18S rRNA	18S rRNA	saccharomyces cerevisiae	saccharomyces cerevisiae	saccharomyces cerevisiae	O2'(hydroxyl)-O2'(hydroxyl)[2.67]_O2'(hydroxyl)-O2(carbonyl)[2.56]	N1-O2'(hydroxyl)[2.80]_N3-N2(amino)[2.95]	(3,2)	5	5	3	3	0	1	0	0	1		tSS
4v88.cif1	intra	84	211	A6.A.445.	A6.C.442.	A6.G.462.	WC	19-XIX	cWW	cW-W	X	A|C-G	IC	S	S	LC	LC	SM	CCCAAUC	UUACCCA	GAGGUAG				18S rRNA	18S rRNA	18S rRNA	saccharomyces cerevisiae	saccharomyces cerevisiae	saccharomyces cerevisiae		N6(amino)-N3[3.02]_N1-O2'(hydroxyl)[2.77]	(4,3)	4	4	3	3	0	0	0	0	0		cWS
4v88.cif1	intra	84	211	A6.A.445.	A6.C.443.	A6.G.461.	WC	19-XIX	cWW	cW-W	X	A|C-G	IC	S	S	LC	LC	SM	CCCAAUC	UACCCAA	GGAGGUA				18S rRNA	18S rRNA	18S rRNA	saccharomyces cerevisiae	saccharomyces cerevisiae	saccharomyces cerevisiae	N7-O2'(hydroxyl)[3.18]_N6(amino)-O2(carbonyl)[3.13]		(4,3)	4	4	3	3	0	0	0	0	0	cHS
4v88.cif1	intra	84	211	A6.A.446.	A6.C.443.	A6.G.461.	WC	19-XIX	cWW	cW-W	X	A|C-G	IC	S	S	LC	LC	SM	CCAAUCC	UACCCAA	GGAGGUA				18S rRNA	18S rRNA	18S rRNA	saccharomyces cerevisiae	saccharomyces cerevisiae	saccharomyces cerevisiae		N6(amino)-N3[3.14]_N1-O2'(hydroxyl)[2.79]	(4,3)	4	4	3	3	0	0	0	0	0		cWS
4v88.cif1	intra	84	211	A6.A.525.	A6.C.442.	A6.G.462.	WC	19-XIX	cWW	cW-W	X	A|C-G	JCJP	S	S	LC	LC	SM	UGUAAAU	UUACCCA	GAGGUAG				18S rRNA	18S rRNA	18S rRNA	saccharomyces cerevisiae	saccharomyces cerevisiae	saccharomyces cerevisiae	N6(amino)-O2(carbonyl)[3.08]_N1-O2'(hydroxyl)[2.88]		(4,3)	4	40	3	3	1	0	0	0	1	cWS
4v88.cif1	intra	84	211	A6.A.526.	A6.A.441.	A6.U.463.	WC	20-XX	cWW	cW-W	X	A|A-U	JCJP	S	S	LC	LC	SM	GUAAAUA	AUUACCC	AGGUAGU				18S rRNA	18S rRNA	18S rRNA	saccharomyces cerevisiae	saccharomyces cerevisiae	saccharomyces cerevisiae		N6(amino)-O2'(hydroxyl)[3.25]	(4,3)	4	40	3	3	1	1	0	0	1
4v88.cif1	intra	0	212	A6.A.534.	A6.A.518.	A6.U.533.	WC	20-XX	cWW	cW-W	X	A|A-U	JCJP	JCJP	JCJP	SM	SM	SM	CUUAACG	AGUACAA	CCUUAAC				18S rRNA	18S rRNA	18S rRNA	saccharomyces cerevisiae	saccharomyces cerevisiae	saccharomyces cerevisiae	N6(amino)-O2'(hydroxyl)[3.03]_N6(amino)-N3[2.93]		(1,1)	1	40	40	40	0	0	1	0	1	tHS
4v88.cif1	intra	85	213	A6.A.555.	A6.G.548.	A6.C.590.	WC	19-XIX	cWW	cW-W	II	A|G-C	HP	S	S	LR	LR	SM	GGCAAGU	AUUGGAG	CUCCAAU				18S rRNA	18S rRNA	18S rRNA	saccharomyces cerevisiae	saccharomyces cerevisiae	saccharomyces cerevisiae		N3-O2'(hydroxyl)[2.83]	(2,2)	3	6	5	5	1	0	0	0	1		cSS
4v88.cif1	intra	85	213	A6.A.556.	A6.G.549.	A6.C.589.	WC	19-XIX	cWW	cW-W	I	A|G-C	HP	S	S	LR	LR	SM	GCAAGUC	UUGGAGG	GCUCCAA				18S rRNA	18S rRNA	18S rRNA	saccharomyces cerevisiae	saccharomyces cerevisiae	saccharomyces cerevisiae	N1-O2'(hydroxyl)[2.76]_N3-N2(amino)[2.91]	O2'(hydroxyl)-O2'(hydroxyl)[2.90]	(2,2)	3	6	5	5	1	0	0	0	1	tWS		Interior Loop	Stem
4v88.cif1	intra	86	214	A6.A.619.	A6.C.14.	A6.G.1140.	WC	19-XIX	cWW	cW-W	I	A|C-G	JP	S	S	LR	LR	SM	GUUAAAA	AUCCUGC	AAAGGAA	abAB	1,2,-1,-2	2	18S rRNA	18S rRNA	18S rRNA	saccharomyces cerevisiae	saccharomyces cerevisiae	saccharomyces cerevisiae	N1-O2'(hydroxyl)[2.86]	O2'(hydroxyl)-O2'(hydroxyl)[3.09]_N3-N2(amino)[2.97]	(2,2)	4	7	3	3	0	0	0	0	0		cSS
4v88.cif1	intra	87	215	A6.A.620.	A6.C.614.	A6.G.1107.	WC	19-XIX	cWW	cW-W	II	A|C-G	JP	S	S	LC	LC	SM	UUAAAAA	UUGCAGU	UCUGGGG	abAcdeBEfDFC	1,2,3,4,5,6,7,8,9,10,11,-10,-9,-8,-7,-6,-5,-4,-3,-2,-1,12,13,14,15,16,17,18,-11,-18,-17,-16,-15,-14,19,20,21,-13,-21,-20,-19,-12	12	18S rRNA	18S rRNA	18S rRNA	saccharomyces cerevisiae	saccharomyces cerevisiae	saccharomyces cerevisiae		O2'(hydroxyl)-O2'(hydroxyl)[2.80]_N3-O2'(hydroxyl)[2.62]	(2,2)	3	7	3	3	0	0	0	0	0		cWS
4v88.cif1	intra	87	215	A6.A.621.	A6.A.615.	A6.U.1106.	WC	20-XX	cWW	cW-W	I	A|A-U	JP	S	S	LC	LC	SM	UAAAAAG	UGCAGUU	UUCUGGG	abAcdeBEfDFC	1,2,3,4,5,6,7,8,9,10,11,-10,-9,-8,-7,-6,-5,-4,-3,-2,-1,12,13,14,15,16,17,18,-11,-18,-17,-16,-15,-14,19,20,21,-13,-21,-20,-19,-12	12	18S rRNA	18S rRNA	18S rRNA	saccharomyces cerevisiae	saccharomyces cerevisiae	saccharomyces cerevisiae	N1-O2'(hydroxyl)[2.56]	O2'(hydroxyl)-O2'(hydroxyl)[2.60]_O2'(hydroxyl)-O2(carbonyl)[3.20]	(2,2)	3	7	3	3	0	0	0	0	0
4v88.cif1	intra	0	216	A6.A.623.	A6.A.622.	A6.U.1104.	WC	20-XX	cWW	cW-W	X	A|A-U	JP	JP	BI	SM	LR	LR	AAAAGCU	AAAAAGC	GGUUCUG				18S rRNA	18S rRNA	18S rRNA	saccharomyces cerevisiae	saccharomyces cerevisiae	saccharomyces cerevisiae	OP1*OP1[3.37]	N6(amino)-O2'(hydroxyl)[2.92]	(1,1)	2	7	7	1	0	0	0	0	0		tW.
4v88.cif1	intra	0	217	A6.A.755.	A6.G.363.	A6.C.381.	WC	19-XIX	cWW	cW-W	X	A|G-C	IC	S	S	LR	LR	SM	AAAAAAU	ACGGGGA	AUUCCGG				18S rRNA	18S rRNA	18S rRNA	saccharomyces cerevisiae	saccharomyces cerevisiae	saccharomyces cerevisiae		N6(amino)-O2(carbonyl)[3.16]_N1-O2'(hydroxyl)[2.61]	(1,1)	3	7	3	3	0	0	0	0	0		cWS
4v88.cif1	intra	88	218	A6.A.769.	A6.C.36.	A6.U.472.	NA	18-XVIII	cWW	cW-W	II	A|C-U	HC	JC	JCJP	LR	LR	SM	UUCAAAG	UGUCUCA	CAAUAAA				18S rRNA	18S rRNA	18S rRNA	saccharomyces cerevisiae	saccharomyces cerevisiae	saccharomyces cerevisiae		O2'(hydroxyl)-O3'[3.07]_O2'(hydroxyl)-O2'(hydroxyl)[2.89]_N3-O2'(hydroxyl)[2.64]	(2,2)	3	7	16	18	0	0	0	0	0
4v88.cif1	intra	88	218	A6.A.770.	A6.U.37.	A6.A.471.	WC	20-XX	cWW	cW-W	I	A|U-A	HC	JC	JCJP	LR	LR	SM	UCAAAGC	GUCUCAA	ACAAUAA				18S rRNA	18S rRNA	18S rRNA	saccharomyces cerevisiae	saccharomyces cerevisiae	saccharomyces cerevisiae	N1-O2'(hydroxyl)[2.57]	O2'(hydroxyl)-O2'(hydroxyl)[3.35]	(2,2)	3	7	16	18	0	0	0	0	0	tWS
4v88.cif1	intra	0	219	A6.A.796.	A6.G.109.	A6.C.305.	WC	19-XIX	cWW	cW-W	I	A|G-C	IC	S	S	LR	LR	SM	AUUAGCA	UCAGUUA	UUUCUGC	abAcdeBEfDFC	1,2,3,4,5,6,7,8,9,10,11,-10,-9,-8,-7,-6,-5,-4,-3,-2,-1,12,13,14,15,16,17,18,-11,-18,-17,-16,-15,-14,19,20,21,-13,-21,-20,-19,-12	6	18S rRNA	18S rRNA	18S rRNA	saccharomyces cerevisiae	saccharomyces cerevisiae	saccharomyces cerevisiae	N1-O2'(hydroxyl)[2.73]_N3-N2(amino)[3.37]		(1,1)	3	6	3	3	0	1	0	0	1	tSS
4v88.cif1	intra	89	220	A6.A.804.	A6.C.747.	A6.G.802.	WC	19-XIX	cWW	cW-W	X	A|C-G	BC	S	S	LC	LC	SM	GGAAUAA	UUACUUU	AUGGAAU				18S rRNA	18S rRNA	18S rRNA	saccharomyces cerevisiae	saccharomyces cerevisiae	saccharomyces cerevisiae	N6(amino)-O2(carbonyl)[3.29]		(1,2)	3	2	2	2	1	1	0	0	1
4v88.cif1	intra	89	220	A6.A.804.	A6.C.747.	A6.A.803.	NA	n/a	cWW	cW-W	X	A|C-A	BC	S	BC	LC	SM	LC	GGAAUAA	UUACUUU	UGGAAUA				18S rRNA	18S rRNA	18S rRNA	saccharomyces cerevisiae	saccharomyces cerevisiae	saccharomyces cerevisiae	N6(amino)-O2(carbonyl)[3.29]	OP2-O2'(hydroxyl)[2.59]_N6(amino)-N3[3.28]	(1,2)	3	2	2	2	1	1	0	0	1		cHS
4v88.cif1	intra	90	221	A6.A.906.	A6.G.997.	A6.C.1007.	WC	19-XIX	cWW	cW-W	X	A|G-C	HC	S	S	LR	LR	SM	UGAAAUU	GAUGAUC	UACCGUC				18S rRNA	18S rRNA	18S rRNA	saccharomyces cerevisiae	saccharomyces cerevisiae	saccharomyces cerevisiae	N1-N2(amino)[3.21]		(2,2)	3	8	4	4	1	0	0	0	1	cWS
4v88.cif1	intra	90	221	A6.A.907.	A6.U.996.	A6.G.1008.	WB	28-XXVIII	cWW	cW-W	X	A|U-G	HC	S	S	LR	LR	SM	GAAAUUC	AGAUGAU	ACCGUCG				18S rRNA	18S rRNA	18S rRNA	saccharomyces cerevisiae	saccharomyces cerevisiae	saccharomyces cerevisiae		N6(amino)-O2'(hydroxyl)[3.21]_N1-O2'(hydroxyl)[2.99]	(2,2)	3	8	4	4	1	0	0	0	1
4v88.cif1	intra	0	222	A6.A.915.	A6.G.899.	A6.C.910.	WC	19-XIX	cWW	cW-W	I	A|G-C	IC	S	S	LC	LC	SM	UGGAUUU	UCAGAGG	AUUCUUG				18S rRNA	18S rRNA	18S rRNA	saccharomyces cerevisiae	saccharomyces cerevisiae	saccharomyces cerevisiae	N1-O2'(hydroxyl)[2.77]_N3-N2(amino)[2.84]	O2'(hydroxyl)-O2'(hydroxyl)[2.92]	(1,1)	3	8	2	2	0	0	0	0	0	tSS
4v88.cif1	intra	91	223	A6.A.939.	A6.G.624.	A6.C.975.	WC	19-XIX	cWW	cW-W	X	A|G-C	HC	JP	JP	LR	LR	SM	GCGAAAG	AAAGCUC	GAACGAA				18S rRNA	18S rRNA	18S rRNA	saccharomyces cerevisiae	saccharomyces cerevisiae	saccharomyces cerevisiae		N6(amino)-O2'(hydroxyl)[3.19]_N1-O2'(hydroxyl)[3.38]_N1*O2(carbonyl)[3.26]	(2,2)	3	4	7	6	1	0	0	0	1		tWS
4v88.cif1	intra	91	223	A6.A.939.	A6.C.625.	A6.A.974.	-W	n/a	cWW	cW-W	X	A|C-A	HC	JP	JP	LR	LR	SM	GCGAAAG	AAGCUCG	AGAACGA				18S rRNA	18S rRNA	18S rRNA	saccharomyces cerevisiae	saccharomyces cerevisiae	saccharomyces cerevisiae	O2'(hydroxyl)-O3'[2.92]_O2'(hydroxyl)-O2'(hydroxyl)[2.62]_N3-O2'(hydroxyl)[2.86]		(2,2)	3	4	7	6	1	0	0	0	1
4v88.cif1	intra	91	223	A6.A.940.	A6.G.624.	A6.C.975.	WC	19-XIX	cWW	cW-W	I	A|G-C	HC	JP	JP	LR	LR	SM	CGAAAGC	AAAGCUC	GAACGAA				18S rRNA	18S rRNA	18S rRNA	saccharomyces cerevisiae	saccharomyces cerevisiae	saccharomyces cerevisiae	O2'(hydroxyl)-O2'(hydroxyl)[3.36]_N3-N2(amino)[2.93]	N6(amino)-O2'(hydroxyl)[3.23]_N1-O2'(hydroxyl)[2.75]	(2,2)	3	4	7	6	1	0	0	0	1	cSS
4v88.cif1	intra	92	224	A6.A.977.	A6.C.1773.	A6.G.1788.	WC	19-XIX	cWW	cW-W	X	A|C-G	JP	S	S	LR	LR	SM	ACGAAAG	UUCCGUA	UGCGGAA				18S rRNA	18S rRNA	18S rRNA	saccharomyces cerevisiae	saccharomyces cerevisiae	saccharomyces cerevisiae		N3-O2'(hydroxyl)[3.48]	(2,2)	3	6	9	9	1	0	0	0	1		cWS
4v88.cif1	intra	92	224	A6.A.978.	A6.G.1774.	A6.C.1787.	WC	19-XIX	cWW	cW-W	I	A|G-C	JP	S	S	LR	LR	SM	CGAAAGU	UCCGUAG	CUGCGGA				18S rRNA	18S rRNA	18S rRNA	saccharomyces cerevisiae	saccharomyces cerevisiae	saccharomyces cerevisiae	N3-N2(amino)[3.08]	O3'-O2'(hydroxyl)[2.89]_O2'(hydroxyl)-O2'(hydroxyl)[2.70]_O2'(hydroxyl)-O2(carbonyl)[2.70]	(2,2)	3	6	9	9	1	0	0	0	1	tSS
4v88.cif1	intra	0	225	A6.A.988.	A6.A.887.	A6.G.925.	IM	08-VIII	cWW	cW-W	X	A|A-G	IC	IC	IC	LR	LR	SM	GGGAUCG	AGUAUUC	GAAGACU				18S rRNA	18S rRNA	18S rRNA	saccharomyces cerevisiae	saccharomyces cerevisiae	saccharomyces cerevisiae		N3-N2(amino)[2.98]	(1,1)	3	8	1	1	1	0	0	0	1		tSS
4v88.cif1	intra	86	214	A6.A.1086.	A6.C.13.	A6.G.1141.	WC	19-XIX	cWW	cW-W	I	A|C-G	HPJP	S	S	LR	LR	SM	GAGAAAU	GAUCCUG	AAGGAAU	abAB	1,2,-1,-2	2	18S rRNA	18S rRNA	18S rRNA	saccharomyces cerevisiae	saccharomyces cerevisiae	saccharomyces cerevisiae	O2'(hydroxyl)-O2'(hydroxyl)[3.04]	N1-O2'(hydroxyl)[2.97]_N3-N2(amino)[2.95]	(2,2)	4	2	3	3	1	0	0	0	1		tSS
4v88.cif1	intra	0	226	A6.A.1093.	A6.A.1084.	A6.U.1089.	WC	20-XX	cWW	cW-W	I	A|A-U	JC	S	S	LC	LC	SM	CAAAGUC	ACGAGAA	AAAUCAA	abAcdeBEfDFC	1,2,3,4,5,6,7,8,9,10,11,-10,-9,-8,-7,-6,-5,-4,-3,-2,-1,12,13,14,15,16,17,18,-11,-18,-17,-16,-15,-14,19,20,21,-13,-21,-20,-19,-12	21	18S rRNA	18S rRNA	18S rRNA	saccharomyces cerevisiae	saccharomyces cerevisiae	saccharomyces cerevisiae		N1-O2'(hydroxyl)[2.57]	(1,1)	3	3	2	2	0	0	0	0	0		tWS
4v88.cif1	intra	0	227	A6.A.1124.	A6.G.980.	A6.C.1021.	WC	19-XIX	cWW	cW-W	X	A|G-C	HC	S	S	LR	LR	SM	CGCAAGG	AAAGUUA	UAACCAU				18S rRNA	18S rRNA	18S rRNA	saccharomyces cerevisiae	saccharomyces cerevisiae	saccharomyces cerevisiae	N1-N2(amino)[3.21]		(1,1)	3	4	6	6	1	0	0	0	1	cWS
4v88.cif1	intra	0	228	A6.A.1133.	A6.U.1650.	A6.A.1750.	WC	20-XX	cWW	cW-W	II	A|U-A	IC	S	S	LR	LR	SM	GAAACUU	UAGUACC	GGAACUA				18S rRNA	18S rRNA	18S rRNA	saccharomyces cerevisiae	saccharomyces cerevisiae	saccharomyces cerevisiae	O2'(hydroxyl)-O3'[2.92]_O2'(hydroxyl)-O2'(hydroxyl)[2.68]_N3-O2'(hydroxyl)[2.80]		(1,1)	3	4	4	4	1	0	0	0	1
4v88.cif1	intra	0	229	A6.A.1137.	A6.G.7.	A6.C.17.	WC	19-XIX	cWW	cW-W	X	A|G-C	JP	S	S	LC	LC	SM	CUUAAAG	CUGGUUG	CUGCCAG	abAB	1,2,-1,-2	1	18S rRNA	18S rRNA	18S rRNA	saccharomyces cerevisiae	saccharomyces cerevisiae	saccharomyces cerevisiae		N6(amino)-O2'(hydroxyl)[3.00]_N1-O2'(hydroxyl)[2.68]	(1,1)	3	3	4	4	0	0	0	0	0
4v88.cif1	intra	0	230	A6.A.1138.	A6.G.1109.	A6.U.1136.	WB	28-XXVIII	cWW	cW-W	X	A|G-U	JP	S	S	LC	LC	SM	UUAAAGG	UGGGGGG	ACUUAAA				18S rRNA	18S rRNA	18S rRNA	saccharomyces cerevisiae	saccharomyces cerevisiae	saccharomyces cerevisiae	N1-O2'(hydroxyl)[2.66]_N3-N2(amino)[3.25]		(1,1)	3	3	3	3	0	0	0	0	0	t.S
4v88.cif1	intra	93	231	A6.A.1183.	A6.C.1210.	A6.G.1453.	WC	19-XIX	cWW	cW-W	II	A|C-G	JC	S	S	LC	LC	SM	CUUAAUU	CACCAGG	UCUGGGC				18S rRNA	18S rRNA	18S rRNA	saccharomyces cerevisiae	saccharomyces cerevisiae	saccharomyces cerevisiae	O2'(hydroxyl)-O3'[3.19]_O2'(hydroxyl)-O2'(hydroxyl)[2.79]_N3-O2'(hydroxyl)[2.79]		(2,2)	3	6	5	5	0	0	0	0	0
4v88.cif1	intra	93	231	A6.A.1184.	A6.C.1209.	A6.G.1454.	WC	19-XIX	cWW	cW-W	I	A|C-G	JC	S	S	LC	LC	SM	UUAAUUU	UCACCAG	CUGGGCC				18S rRNA	18S rRNA	18S rRNA	saccharomyces cerevisiae	saccharomyces cerevisiae	saccharomyces cerevisiae	O2'(hydroxyl)-O2'(hydroxyl)[2.61]_O2'(hydroxyl)-O2(carbonyl)[3.14]	N1-O2'(hydroxyl)[2.53]_N3-N2(amino)[3.17]	(2,2)	3	6	5	5	0	0	0	0	0		tWS
4v88.cif1	intra	0	232	A6.A.1196.	A6.C.1174.	A6.C.1465.	NA	n/a	cWW	cW-W	X	A|C-C	HC	IC	IC	LR	LR	SM	AACACGG	AGCCUGC	GCGCGCU				18S rRNA	18S rRNA	18S rRNA	saccharomyces cerevisiae	saccharomyces cerevisiae	saccharomyces cerevisiae	N6(amino)-O2'(hydroxyl)[3.19]		(1,1)	3	8	1	1	0	1	0	0	1
4v88.cif1	intra	0	233	A6.A.1242.	A6.G.1213.	A6.U.1450.	WB	28-XXVIII	cWW	cW-W	X	A|G-U	HC	S	S	LR	LR	SM	UUGAGAG	CAGGUCC	CGUUCUG				18S rRNA	18S rRNA	18S rRNA	saccharomyces cerevisiae	saccharomyces cerevisiae	saccharomyces cerevisiae	N6(amino)-O2'(hydroxyl)[3.06]		(1,1)	3	8	5	5	1	0	0	0	1
4v88.cif1	intra	0	234	A6.A.1300.	A6.A.11.	A6.A.1143.	NA	n/a	cWW	cW-W	I	A|A-A	HC	HP	JI	LR	LR	LR	GUGAUUU	UUGAUCC	GGAAUUG				18S rRNA	18S rRNA	18S rRNA	saccharomyces cerevisiae	saccharomyces cerevisiae	saccharomyces cerevisiae	O2'(hydroxyl)-O2'(hydroxyl)[2.81]_O2'(hydroxyl)-N3[2.87]	N1-O2'(hydroxyl)[2.62]	(1,1)	3	4	4	2	1	0	0	0	1	cSW	tWS
4v88.cif1	intra	0	235	A6.A.1321.	A6.G.1294.	A6.U.1303.	WB	28-XXVIII	cWW	cW-W	I	A|G-U	JC	S	S	LC	LC	SM	GAUAACG	GGUGGAG	AUUUGUC				18S rRNA	18S rRNA	18S rRNA	saccharomyces cerevisiae	saccharomyces cerevisiae	saccharomyces cerevisiae	N1-O2'(hydroxyl)[2.61]_N3-N2(amino)[3.21]		(1,1)	3	4	3	3	0	0	1	0	1	tSS
4v88.cif1	intra	94	236	A6.A.1400.	A6.G.1308.	A6.C.1317.	WC	19-XIX	cWW	cW-W	II	A|G-C	HC	S	S	LR	LR	SM	UUCAAGC	UCUGCUU	UUGCGAU				18S rRNA	18S rRNA	18S rRNA	saccharomyces cerevisiae	saccharomyces cerevisiae	saccharomyces cerevisiae		O2'(hydroxyl)-O2'(hydroxyl)[2.58]_N3-O2'(hydroxyl)[2.90]	(2,2)	3	5	2	2	0	0	0	0	0
4v88.cif1	intra	94	236	A6.A.1401.	A6.C.1309.	A6.G.1316.	WC	19-XIX	cWW	cW-W	I	A|C-G	HC	S	S	LR	LR	SM	UCAAGCC	CUGCUUA	AUUGCGA				18S rRNA	18S rRNA	18S rRNA	saccharomyces cerevisiae	saccharomyces cerevisiae	saccharomyces cerevisiae	N1-O2'(hydroxyl)[2.41]	O2'(hydroxyl)-O2'(hydroxyl)[2.41]_N3-N2(amino)[3.02]	(2,2)	3	5	2	2	0	0	0	0	0	tWS	cSS	Hairpin	Stem
4v88.cif1	intra	0	237	A6.A.1460.	A6.G.1179.	A6.C.1459.	WC	19-XIX	cWW	cW-W	X	A|G-C	BC	S	S	LC	LC	SM	CGCACGC	GCGGCUU	CCGCACG				18S rRNA	18S rRNA	18S rRNA	saccharomyces cerevisiae	saccharomyces cerevisiae	saccharomyces cerevisiae	N1-N2(amino)[3.01]		(1,1)	3	1	2	2	0	0	0	0	0	tWS
4v88.cif1	intra	0	238	A6.A.1471.	A6.G.1474.	A6.C.1533.	WC	19-XIX	cWW	cW-W	II	A|G-C	JC	S	S	LC	LC	SM	UACACUG	ACUGACG	CGUCGUG				18S rRNA	18S rRNA	18S rRNA	saccharomyces cerevisiae	saccharomyces cerevisiae	saccharomyces cerevisiae	N1-N2(amino)[2.89]_N3-O2'(hydroxyl)[2.81]		(1,1)	3	5	7	7	0	0	0	0	0	cWS
4v88.cif1	intra	0	239	A6.A.1505.	A6.C.1549.	A6.G.1562.	WC	19-XIX	cWW	cW-W	I	A|C-G	HC	S	S	LR	LR	SM	GAGAGGU	GAGCAUU	AUUGCUC				18S rRNA	18S rRNA	18S rRNA	saccharomyces cerevisiae	saccharomyces cerevisiae	saccharomyces cerevisiae		O2'(hydroxyl)-O2'(hydroxyl)[3.07]_O2'(hydroxyl)-N3[3.13]	(1,1)	3	4	6	6	1	0	0	0	1		cSS
4v88.cif1	intra	0	240	A6.A.1515.	A6.C.1494.	A6.G.1513.	WC	19-XIX	cWW	cW-W	X	A|C-G	IC	S	S	LC	LC	SM	GGUAAUC	UAACCUU	UUGGUAA				18S rRNA	18S rRNA	18S rRNA	saccharomyces cerevisiae	saccharomyces cerevisiae	saccharomyces cerevisiae		N3-O2'(hydroxyl)[2.65]	(1,1)	3	4	2	2	1	0	0	0	1
4v88.cif1	intra	0	241	A6.A.1516.	A6.A.1345.	A6.U.1380.	WC	20-XX	cWW	cW-W	X	A|A-U	IC	S	S	LR	LR	SM	GUAAUCU	CUAAAUA	UUCUUAG				18S rRNA	18S rRNA	18S rRNA	saccharomyces cerevisiae	saccharomyces cerevisiae	saccharomyces cerevisiae		N6(amino)-O2(carbonyl)[3.07]_N1-O2'(hydroxyl)[2.60]	(1,1)	3	4	4	4	1	0	0	0	1		cWS
4v88.cif1	intra	95	242	A6.A.1524.	A6.C.1589.	A6.G.1607.	WC	19-XIX	cWW	cW-W	X	A|C-G	IC	S	S	LR	LR	SM	GUGAAAC	AAGCGCA	UGCGUUG				18S rRNA	18S rRNA	18S rRNA	saccharomyces cerevisiae	saccharomyces cerevisiae	saccharomyces cerevisiae		N1-N2(amino)[2.88]	(3,2)	5	7	6	6	1	0	0	0	1		tWS
4v88.cif1	intra	95	242	A6.A.1525.	A6.C.1589.	A6.G.1607.	WC	19-XIX	cWW	cW-W	II	A|C-G	IC	S	S	LR	LR	SM	UGAAACU	AAGCGCA	UGCGUUG				18S rRNA	18S rRNA	18S rRNA	saccharomyces cerevisiae	saccharomyces cerevisiae	saccharomyces cerevisiae	O2'(hydroxyl)-O3'[2.76]_O2'(hydroxyl)-O2'(hydroxyl)[2.85]_N3-O2'(hydroxyl)[2.47]		(3,2)	5	7	6	6	1	0	0	0	1
4v88.cif1	intra	95	242	A6.A.1526.	A6.G.1588.	A6.U.1608.	NA	n/a	cWW	cW-W	I	A|G-U	IC	JC	JC	LR	LR	SM	GAAACUC	UAAGCGC	GCGUUGA				18S rRNA	18S rRNA	18S rRNA	saccharomyces cerevisiae	saccharomyces cerevisiae	saccharomyces cerevisiae	N3-N2(amino)[3.60]	N1-O2'(hydroxyl)[2.72]	(3,2)	5	7	7	8	1	0	0	0	1	cSS
4v88.cif1	intra	0	243	A6.A.1570.	A6.A.1171.	A6.U.1468.	WC	20-XX	cWW	cW-W	II	A|A-U	JC	S	S	LC	LC	SM	UCAACGA	UGGAGCC	CGCUACA				18S rRNA	18S rRNA	18S rRNA	saccharomyces cerevisiae	saccharomyces cerevisiae	saccharomyces cerevisiae	O2'(hydroxyl)-O3'[3.17]_O2'(hydroxyl)-O2'(hydroxyl)[2.64]_N3-O2'(hydroxyl)[2.69]		(1,1)	3	10	3	3	0	0	0	0	0	cSS
4v88.cif1	intra	0	244	A6.A.1635.	A6.G.1146.	A6.C.1632.	WC	19-XIX	cWW	cW-W	I	A|G-C	JI	S	S	LC	LC	SM	CACACCG	AUUGACG	GUACACA				18S rRNA	18S rRNA	18S rRNA	saccharomyces cerevisiae	saccharomyces cerevisiae	saccharomyces cerevisiae	N1-O2'(hydroxyl)[2.76]_N3-N2(amino)[3.21]	O2'(hydroxyl)-O2'(hydroxyl)[2.88]_O2'(hydroxyl)-O2(carbonyl)[2.88]	(1,1)	3	7	2	2	0	0	0	0	0	tSS		Exterior Loop	Interior Loop
4v88.cif1	inter	96	245	A6.A.1655.	A5.A.2291.	A5.U.2301.	WC	20-XX	cWW	cW-W	I	A|A-U	IC	S	S	LR	LR	SM	CCGAUUG	GUCAUCU	UAGUGAC				18S rRNA	25S rRNA	25S rRNA	saccharomyces cerevisiae	saccharomyces cerevisiae	saccharomyces cerevisiae	N1-O2'(hydroxyl)[2.57]	O2'(hydroxyl)-O2'(hydroxyl)[3.57]	(2,2)	4	4	5	5	0	0	0	0	0	tWS
4v88.cif1	inter	96	245	A6.A.1746.	A5.C.2290.	A5.G.2302.	WC	19-XIX	cWW	cW-W	I	A|C-G	IC	S	S	LR	LR	SM	UAGAGGA	CGUCAUC	AGUGACG				18S rRNA	25S rRNA	25S rRNA	saccharomyces cerevisiae	saccharomyces cerevisiae	saccharomyces cerevisiae	O2'(hydroxyl)-O2'(hydroxyl)[2.76]_O2'(hydroxyl)-O2(carbonyl)[3.03]	N1-O2'(hydroxyl)[3.00]_N3-N2(amino)[3.29]	(2,2)	4	3	5	5	0	0	0	0	0		tSS
4v88.cif1	intra	0	246	A6.A.1765.	A6.C.1148.	A6.G.1629.	WC	19-XIX	cWW	cW-W	I	A|C-G	JI	S	S	LR	LR	SM	AACAAGG	UGACGGA	UUUGUAC				18S rRNA	18S rRNA	18S rRNA	saccharomyces cerevisiae	saccharomyces cerevisiae	saccharomyces cerevisiae	N1-O2'(hydroxyl)[2.81]	O5'-O2'(hydroxyl)[2.74]_N3-N2(amino)[3.02]	(1,1)	3	9	3	3	0	1	0	0	1		cSS
4v88.cif1	intra	0	247	A6.A.1781.	A6.C.1641.	A6.G.1760.	WC	19-XIX	cWW	cW-W	I	A|C-G	HC	S	S	LR	LR	SM	GUGAACC	GCCCGUC	GUCGUAA				18S rRNA	18S rRNA	18S rRNA	saccharomyces cerevisiae	saccharomyces cerevisiae	saccharomyces cerevisiae		N1-O2'(hydroxyl)[2.60]	(1,1)	3	4	2	2	1	0	0	0	1
4v88.cif1	inter	97	248	A5.A.846.	A6.C.627.	A6.G.972.	WC	19-XIX	cWW	cW-W	X	A|C-G	HC	S	S	LR	LR	SM	AGGAAAC	GCUCGUA	CAAGAAC	abAcdeBEfDFC	1,2,3,4,5,6,7,8,9,10,11,-10,-9,-8,-7,-6,-5,-4,-3,-2,-1,12,13,14,15,16,17,18,-11,-18,-17,-16,-15,-14,19,20,21,-13,-21,-20,-19,-12	14	25S rRNA	18S rRNA	18S rRNA	saccharomyces cerevisiae	saccharomyces cerevisiae	saccharomyces cerevisiae		N6(amino)-N3[3.18]_N1-N2(amino)[3.03]	(2,1)	3	4	2	2	1	0	0	0	1		tWS
4v88.cif1	inter	97	248	A5.A.847.	A6.C.627.	A6.G.972.	WC	19-XIX	cWW	cW-W	X	A|C-G	HC	S	S	LR	LR	SM	GGAAACU	GCUCGUA	CAAGAAC	abAcdeBEfDFC	1,2,3,4,5,6,7,8,9,10,11,-10,-9,-8,-7,-6,-5,-4,-3,-2,-1,12,13,14,15,16,17,18,-11,-18,-17,-16,-15,-14,19,20,21,-13,-21,-20,-19,-12	14	25S rRNA	18S rRNA	18S rRNA	saccharomyces cerevisiae	saccharomyces cerevisiae	saccharomyces cerevisiae		N1-O2'(hydroxyl)[2.67]	(2,1)	3	4	2	2	1	0	0	0	1
4v88.cif1	inter	0	249	A5.A.2255.	A6.C.1644.	A6.G.1757.	WC	19-XIX	cWW	cW-W	I	A|C-G	HC	IC	IC	LR	LR	SM	AGUAACU	CGUCGCU	AAAGUCG				25S rRNA	18S rRNA	18S rRNA	saccharomyces cerevisiae	saccharomyces cerevisiae	saccharomyces cerevisiae	N1-O2'(hydroxyl)[2.80]	O2'(hydroxyl)-O2'(hydroxyl)[2.39]_N3-N2(amino)[3.19]	(1,1)	3	9	4	5	1	1	1	0	1		cSS
4v8b.cif1	inter	98	250	AA.A.1492.	AB.A.36.	A1.U.20.	WC	20-XX	cWW	cW-W	X	A|A-U	IC	S	S	LR	LR	SM	GCGAAGU	UUGAGGU	UGUUUUN	abAcdCeDBfghGijkJlmLKInoEOpHPNqMQF	1,2,3,-2,-1,4,5,6,-5,-4,7,-6,-3,8,9,10,11,12,13,14,15,16,-15,-14,-13,-12,-11,-10,-9,17,18,19,20,21,22,-21,23,24,25,26,27,28,29,30,31,-30,-29,-28,-27,-26,-25,-24,-23,-22,-20,-19,-18,-17,32,33,34,35,36,37,-7,-37,38,39,-16,-39,-38,-36,-35,-34,-33,-32,40,41,42,43,44,45,-31,-45,-44,-43,-42,-41,-40,-8	3	16S ribosomal RNA	TRNA-LEU	MRNA	thermus thermophilus	escherichia coli	unspecified		N3-O2'(hydroxyl)[2.76]	(2,2)	5	4	2	2	1	0	0	0	1		cSS
4v8b.cif1	inter	98	250	AA.A.1493.	AB.G.37.	A1.U.19.	NA	n/a	cWW	cW-W	I	A|G-U	IC	HPJP	JP	LR	LR	SM	CGAAGUC	UGAGGUG	AUGUUUU				16S ribosomal RNA	TRNA-LEU	MRNA	thermus thermophilus	escherichia coli	unspecified	N1-O2'(hydroxyl)[2.85]_N3-N2(amino)[3.31]	O2'(hydroxyl)-O2'(hydroxyl)[2.44]	(2,2)	5	4	3	1	0	0	0	0	0	tSS
4v90.cif1	inter	0	251	AA.A.1339.	AV.G.30.	AV.C.40.	WC	19-XIX	cWW	cW-W	I	A|G-C	JC	S	S	LR	LR	SM	CGGAAUC	GGGGAUU	AAUCCCC	abAB	1,2,3,-2,-1,-3	2	16S RIBOSOMAL RNA	RNA (77-MER)	RNA (77-MER)	thermus thermophilus	thermus thermophilus	thermus thermophilus	N3-N2(amino)[3.27]	O2'(hydroxyl)-O2'(hydroxyl)[3.00]	(1,1)	3	10	4	4	1	0	0	0	1	tSS
4v9f.cif1	intra	99	252	0.A.11.	0.A.2085.	0.U.2659.	WC	20-XX	cWW	cW-W	X	A|A-U	II	S	S	LR	LR	SM	ACUAUGC	GACACCC	GGGUGUG	abAcdeDfgFEChBHiGI	1,2,3,4,5,6,7,-6,-5,-4,-3,-2,-1,8,9,10,11,12,13,14,-13,15,16,17,18,19,20,-19,-18,-17,-16,-15,-14,-12,-11,-10,-9,-8,21,22,23,24,25,26,27,28,-7,-28,-27,-26,-25,-24,-23,-22,-21,29,30,31,32,33,34,-20,-34,-33,-32,-31,-30,-29	21	23S Ribosomal RNA	23S Ribosomal RNA	23S Ribosomal RNA	haloarcula marismortui	haloarcula marismortui	haloarcula marismortui	N1-O2'(hydroxyl)[2.69]		(2,2)	4	5	7	7	0	1	0	0	1
4v9f.cif1	intra	0	253	0.A.48.	0.U.43.	0.A.148.	WC	20-XX	cWW	cW-W	I	A|U-A	JC	S	S	LC	LC	SM	AUGAAGG	CGCUGAU	AUGAGGA				23S Ribosomal RNA	23S Ribosomal RNA	23S Ribosomal RNA	haloarcula marismortui	haloarcula marismortui	haloarcula marismortui	O2'(hydroxyl)-O2'(hydroxyl)[2.94]	N1-O2'(hydroxyl)[2.70]	(1,1)	3	6	2	2	0	0	0	0	0
4v9f.cif1	intra	100	254	0.A.67.	0.C.53.	0.G.66.	WC	19-XIX	cWW	cW-W	X	A|C-G	HP	S	S	LC	LC	SM	GCGAUAA	GGACGUG	UGCGAUA	abAcBC	1,2,3,-1,4,5,-3,-2,-5,-4	1	23S Ribosomal RNA	23S Ribosomal RNA	23S Ribosomal RNA	haloarcula marismortui	haloarcula marismortui	haloarcula marismortui		N1-N2(amino)[3.08]	(2,2)	3	5	3	3	1	0	0	0	1		cWS
4v9f.cif1	intra	100	254	0.A.69.	0.G.54.	0.C.65.	WC	19-XIX	cWW	cW-W	I	A|G-C	HP	S	S	LC	LC	SM	GAUAAGC	GACGUGC	CUGCGAU	abAcBC	1,2,3,-1,4,5,-3,-2,-5,-4	1	23S Ribosomal RNA	23S Ribosomal RNA	23S Ribosomal RNA	haloarcula marismortui	haloarcula marismortui	haloarcula marismortui	N1-O2'(hydroxyl)[2.68]_N3-N2(amino)[2.90]	O2'(hydroxyl)-O2'(hydroxyl)[2.70]_O2'(hydroxyl)-O2(carbonyl)[2.54]	(2,2)	3	5	3	3	0	0	0	0	0	tSS		Multi Loop	Stem
4v9f.cif1	intra	0	255	0.A.98.	0.G.81.	0.C.93.	WC	19-XIX	cWW	cW-W	I	A|G-C	IC	S	S	LC	LC	SM	AAGAACC	GGAGCCG	AGGCGAA	abAcBC	1,2,3,-1,4,5,-3,-2,-5,-4	5	23S Ribosomal RNA	23S Ribosomal RNA	23S Ribosomal RNA	haloarcula marismortui	haloarcula marismortui	haloarcula marismortui	N1-O2'(hydroxyl)[2.67]_N3-N2(amino)[3.24]		(1,1)	3	6	3	3	0	0	0	0	0	tSS
4v9f.cif1	intra	101	256	0.A.151.	0.G.41.	0.C.440.	WC	19-XIX	cWW	cW-W	X	A|G-C	JC	JC	JCJP	SM	SM	SM	AGGAACC	GGCGCUG	ACACAAC				23S Ribosomal RNA	23S Ribosomal RNA	23S Ribosomal RNA	haloarcula marismortui	haloarcula marismortui	haloarcula marismortui	N1-N2(amino)[3.22]		(4,3)	4	4	2	9	1	0	0	0	1	tWS
4v9f.cif1	intra	101	256	0.A.152.	0.G.41.	0.C.440.	WC	19-XIX	cWW	cW-W	II	A|G-C	JC	JC	JCJP	SM	SM	SM	GGAACCC	GGCGCUG	ACACAAC				23S Ribosomal RNA	23S Ribosomal RNA	23S Ribosomal RNA	haloarcula marismortui	haloarcula marismortui	haloarcula marismortui		O2'(hydroxyl)-O3'[3.18]_O2'(hydroxyl)-O2'(hydroxyl)[2.82]_N3-O2'(hydroxyl)[2.69]	(4,3)	4	4	2	9	1	0	0	0	1
4v9f.cif1	intra	102	257	0.A.160.	0.C.769.	0.G.892.	WC	19-XIX	cWW	cW-W	X	A|C-G	HC	S	S	LR	LR	SM	GAGAACU	AAUCCGG	CCGGCAA				23S Ribosomal RNA	23S Ribosomal RNA	23S Ribosomal RNA	haloarcula marismortui	haloarcula marismortui	haloarcula marismortui		N6(amino)-O2'(hydroxyl)[2.92]_N1-O2'(hydroxyl)[3.35]	(2,1)	3	19	6	6	1	0	0	0	1
4v9f.cif1	intra	102	257	0.A.161.	0.C.769.	0.G.892.	WC	19-XIX	cWW	cW-W	I	A|C-G	HC	S	S	LR	LR	SM	AGAACUG	AAUCCGG	CCGGCAA				23S Ribosomal RNA	23S Ribosomal RNA	23S Ribosomal RNA	haloarcula marismortui	haloarcula marismortui	haloarcula marismortui	O3'-O2'(hydroxyl)[3.35]_O2'(hydroxyl)-O2'(hydroxyl)[2.73]_O2'(hydroxyl)-O2(carbonyl)[2.68]	N3-N2(amino)[3.01]	(2,1)	3	19	6	6	0	0	0	0	0		tSS	Hairpin	Stem
4v9f.cif1	intra	0	258	0.A.166.	0.U.919.	0.G.924.	WB	28-XXVIII	cWW	cW-W	X	A|U-G	HC	S	S	LR	LR	SM	UGAAACA	AUGUCGA	GAAGCAU				23S Ribosomal RNA	23S Ribosomal RNA	23S Ribosomal RNA	haloarcula marismortui	haloarcula marismortui	haloarcula marismortui		N6(amino)-O2'(hydroxyl)[2.85]_N6(amino)-N3[3.09]_N1-N2(amino)[2.96]	(1,1)	3	19	5	5	1	1	0	0	1		tWS
4v9f.cif1	intra	103	259	0.A.169.	0.C.2119.	0.G.2275.	WC	19-XIX	cWW	cW-W	I	A|C-G	HC	S	S	LR	LR	SM	AACAUCU	UUACUGC	GCAGUUU				23S Ribosomal RNA	23S Ribosomal RNA	23S Ribosomal RNA	haloarcula marismortui	haloarcula marismortui	haloarcula marismortui	N1-O2'(hydroxyl)[2.81]	OP1-O2'(hydroxyl)[2.86]	(2,2)	4	19	5	5	0	1	0	0	1
4v9f.cif1	intra	104	260	0.A.193.	0.G.413.	0.C.427.	WC	19-XIX	cWW	cW-W	I	A|G-C	JC	S	S	LR	LR	SM	GAAAACG	AACGCAG	CUGCGAA	abAcdeDfgFEChBHiGI	1,2,3,4,5,6,7,-6,-5,-4,-3,-2,-1,8,9,10,11,12,13,14,-13,15,16,17,18,19,20,-19,-18,-17,-16,-15,-14,-12,-11,-10,-9,-8,21,22,23,24,25,26,27,28,-7,-28,-27,-26,-25,-24,-23,-22,-21,29,30,31,32,33,34,-20,-34,-33,-32,-31,-30,-29	6	23S Ribosomal RNA	23S Ribosomal RNA	23S Ribosomal RNA	haloarcula marismortui	haloarcula marismortui	haloarcula marismortui	N1-O2'(hydroxyl)[2.58]_N3-N2(amino)[2.94]	O3'-O2'(hydroxyl)[2.87]_O2'(hydroxyl)-O2'(hydroxyl)[2.57]_O2'(hydroxyl)-O2(carbonyl)[2.59]	(2,2)	4	11	5	5	1	0	0	0	1	t.S
4v9f.cif1	intra	0	261	0.A.198.	0.G.416.	0.C.424.	WC	19-XIX	cWW	cW-W	X	A|G-C	HC	S	S	LR	LR	SM	CGCAACG	GCAGGCA	CGACUGC	abAcdeDfgFEChBHiGI	1,2,3,4,5,6,7,-6,-5,-4,-3,-2,-1,8,9,10,11,12,13,14,-13,15,16,17,18,19,20,-19,-18,-17,-16,-15,-14,-12,-11,-10,-9,-8,21,22,23,24,25,26,27,28,-7,-28,-27,-26,-25,-24,-23,-22,-21,29,30,31,32,33,34,-20,-34,-33,-32,-31,-30,-29	6	23S Ribosomal RNA	23S Ribosomal RNA	23S Ribosomal RNA	haloarcula marismortui	haloarcula marismortui	haloarcula marismortui	N6(amino)-O2'(hydroxyl)[2.98]_N6(amino)-N3[2.92]_N1-N2(amino)[2.83]		(1,1)	3	5	5	5	1	0	0	0	1	tWS
4v9f.cif1	intra	0	262	0.A.222.	0.G.164.	0.C.171.	WC	19-XIX	cWW	cW-W	I	A|G-C	HC	HC	HC	LR	LR	SM	GCGAGUG	ACUGAAA	CAUCUCA				23S Ribosomal RNA	23S Ribosomal RNA	23S Ribosomal RNA	haloarcula marismortui	haloarcula marismortui	haloarcula marismortui	N3-N2(amino)[3.41]	N1-O2'(hydroxyl)[2.56]	(1,1)	2	5	19	19	1	0	0	0	1	cSS	tWS
4v9f.cif1	intra	105	263	0.A.242.	0.G.273.	0.C.377.	WC	19-XIX	cWW	cW-W	II	A|G-C	JC	S	S	LC	LC	SM	CCAAACC	UCAGGGC	UGCCAGA				23S Ribosomal RNA	23S Ribosomal RNA	23S Ribosomal RNA	haloarcula marismortui	haloarcula marismortui	haloarcula marismortui		O2'(hydroxyl)-O3'[3.27]_O2'(hydroxyl)-O2'(hydroxyl)[2.85]_N3-O2'(hydroxyl)[2.62]	(2,2)	3	4	2	2	0	0	0	0	0
4v9f.cif1	intra	105	263	0.A.243.	0.G.274.	0.C.376.	WC	19-XIX	cWW	cW-W	I	A|G-C	JC	S	S	LC	LC	SM	CAAACCG	CAGGGCU	GUGCCAG				23S Ribosomal RNA	23S Ribosomal RNA	23S Ribosomal RNA	haloarcula marismortui	haloarcula marismortui	haloarcula marismortui	N1-O2'(hydroxyl)[2.66]_N3-N2(amino)[2.94]	O2'(hydroxyl)-O2'(hydroxyl)[2.61]_O2'(hydroxyl)-O2(carbonyl)[3.10]	(2,2)	3	4	2	2	0	0	0	0	0	tSS		Interior Loop	Multi Loop
4v9f.cif1	intra	106	264	0.A.305.	0.G.326.	0.C.330.	WC	19-XIX	cWW	cW-W	II	A|G-C	JI	HP	HP	LR	LR	SM	ACGAAGU	CGUGAUA	AUACAGG				23S Ribosomal RNA	23S Ribosomal RNA	23S Ribosomal RNA	haloarcula marismortui	haloarcula marismortui	haloarcula marismortui	O2'(hydroxyl)-O2'(hydroxyl)[2.92]_N3-O2'(hydroxyl)[2.82]		(2,2)	4	6	6	6	0	0	0	0	0
4v9f.cif1	intra	106	264	0.A.306.	0.U.325.	0.A.340.	WC	20-XX	cWW	cW-W	I	A|U-A	JI	S	S	LC	LC	SM	CGAAGUC	GCGUGAU	ACAACCC	abAB	1,2,-1,-2	1	23S Ribosomal RNA	23S Ribosomal RNA	23S Ribosomal RNA	haloarcula marismortui	haloarcula marismortui	haloarcula marismortui	O2'(hydroxyl)-O2'(hydroxyl)[2.81]_O2'(hydroxyl)-O2(carbonyl)[2.89]	N1-O2'(hydroxyl)[2.78]	(2,2)	4	6	2	2	0	0	0	0	0		tWS
4v9f.cif1	intra	104	260	0.A.408.	0.C.412.	0.G.428.	WC	19-XIX	cWW	cW-W	II	A|C-G	JC	S	S	LC	LC	SM	CGAAUAA	UAACGCA	UGCGAAG	abAcdeDfgFEChBHiGI	1,2,3,4,5,6,7,-6,-5,-4,-3,-2,-1,8,9,10,11,12,13,14,-13,15,16,17,18,19,20,-19,-18,-17,-16,-15,-14,-12,-11,-10,-9,-8,21,22,23,24,25,26,27,28,-7,-28,-27,-26,-25,-24,-23,-22,-21,29,30,31,32,33,34,-20,-34,-33,-32,-31,-30,-29	6	23S Ribosomal RNA	23S Ribosomal RNA	23S Ribosomal RNA	haloarcula marismortui	haloarcula marismortui	haloarcula marismortui	O2'(hydroxyl)-O3'[3.07]_O2'(hydroxyl)-O2'(hydroxyl)[2.71]		(2,2)	4	6	5	5	0	1	0	0	1
4v9f.cif1	intra	101	256	0.A.439.	0.C.153.	0.G.184.	WC	19-XIX	cWW	cW-W	II	A|C-G	JCJP	JC	JC	SM	SM	SM	AACACAA	GAACCCC	GGAGGAA				23S Ribosomal RNA	23S Ribosomal RNA	23S Ribosomal RNA	haloarcula marismortui	haloarcula marismortui	haloarcula marismortui	O2'(hydroxyl)-O2'(hydroxyl)[2.76]_N3-O2'(hydroxyl)[2.77]		(4,3)	4	9	4	11	0	1	0	0	1	cSS
4v9f.cif1	intra	101	256	0.A.442.	0.C.40.	0.A.441.	-W	n/a	cWW	cW-W	X	A|C-A	JCJP	JC	JCJP	SM	SM	SM	ACAACCU	AGGCGCU	CACAACC				23S Ribosomal RNA	23S Ribosomal RNA	23S Ribosomal RNA	haloarcula marismortui	haloarcula marismortui	haloarcula marismortui	N6(amino)-O2(carbonyl)[2.79]	OP2-O2'(hydroxyl)[3.11]_N6(amino)-N3[3.15]	(4,3)	4	9	2	9	0	0	0	0	0	cWW	cHS
4v9f.cif1	intra	0	265	0.A.449.	0.C.1305.	0.G.1349.	WC	19-XIX	cWW	cW-W	I	A|C-G	BCJP	S	S	LR	LR	SM	GAGACCG	GCUCUAA	UUAGUGA				23S Ribosomal RNA	23S Ribosomal RNA	23S Ribosomal RNA	haloarcula marismortui	haloarcula marismortui	haloarcula marismortui	O3'-O2'(hydroxyl)[3.14]_O2'(hydroxyl)-O2'(hydroxyl)[2.63]_O2'(hydroxyl)-O2(carbonyl)[3.23]	N1-O2'(hydroxyl)[2.74]_N3-N2(amino)[3.28]	(1,1)	3	1	8	8	1	0	0	0	1		t.S
4v9f.cif1	intra	0	266	0.A.455.	0.G.32.	0.C.451.	WC	19-XIX	cWW	cW-W	II	A|G-C	JCJP	S	S	LC	LC	SM	GAUAGUG	CUCGGCU	GACCGAU	abAcdeDfgFEChBHiGI	1,2,3,4,5,6,7,-6,-5,-4,-3,-2,-1,8,9,10,11,12,13,14,-13,15,16,17,18,19,20,-19,-18,-17,-16,-15,-14,-12,-11,-10,-9,-8,21,22,23,24,25,26,27,28,-7,-28,-27,-26,-25,-24,-23,-22,-21,29,30,31,32,33,34,-20,-34,-33,-32,-31,-30,-29	3	23S Ribosomal RNA	23S Ribosomal RNA	23S Ribosomal RNA	haloarcula marismortui	haloarcula marismortui	haloarcula marismortui		O2'(hydroxyl)-O2'(hydroxyl)[2.79]_N3-O2'(hydroxyl)[2.92]	(1,1)	3	15	2	2	0	0	0	0	0		cWS
4v9f.cif1	intra	0	267	0.A.472.	0.A.773.	0.U.888.	WC	20-XX	cWW	cW-W	I	A|A-U	HC	S	S	LR	LR	SM	GUGAACG	CGGACGA	GAGUCCG				23S Ribosomal RNA	23S Ribosomal RNA	23S Ribosomal RNA	haloarcula marismortui	haloarcula marismortui	haloarcula marismortui	O2'(hydroxyl)-O2'(hydroxyl)[3.07]	N1-O2'(hydroxyl)[2.62]	(1,1)	3	4	6	6	1	0	0	0	1		tWS
4v9f.cif1	intra	107	268	0.A.520.	0.C.638.	0.G.1363.	WC	19-XIX	cWW	cW-W	II	A|C-G	JCJP	S	S	LC	LC	SM	UGAAAUC	AGCCAGG	CCUGGCC				23S Ribosomal RNA	23S Ribosomal RNA	23S Ribosomal RNA	haloarcula marismortui	haloarcula marismortui	haloarcula marismortui	O2'(hydroxyl)-O2'(hydroxyl)[2.66]_N3-O2'(hydroxyl)[2.73]		(2,2)	3	20	6	6	1	0	0	0	1	cSS
4v9f.cif1	intra	107	268	0.A.521.	0.C.637.	0.G.1364.	WC	19-XIX	cWW	cW-W	I	A|C-G	JCJP	S	S	LC	LC	SM	GAAAUCA	GAGCCAG	CUGGCCA				23S Ribosomal RNA	23S Ribosomal RNA	23S Ribosomal RNA	haloarcula marismortui	haloarcula marismortui	haloarcula marismortui	O2'(hydroxyl)-O2'(hydroxyl)[2.86]_O2'(hydroxyl)-O2(carbonyl)[3.02]	N1-O2'(hydroxyl)[2.82]_N3-N2(amino)[3.06]	(2,2)	3	20	6	6	1	1	0	0	1		tSS	Multi Loop	Stem
4v9f.cif1	intra	99	252	0.A.532.	0.C.2084.	0.G.2660.	WC	19-XIX	cWW	cW-W	I	A|C-G	JP	S	S	LC	LC	SM	GCGAUCG	AGACACC	GGUGUGU	abAcdeDfgFEChBHiGI	1,2,3,4,5,6,7,-6,-5,-4,-3,-2,-1,8,9,10,11,12,13,14,-13,15,16,17,18,19,20,-19,-18,-17,-16,-15,-14,-12,-11,-10,-9,-8,21,22,23,24,25,26,27,28,-7,-28,-27,-26,-25,-24,-23,-22,-21,29,30,31,32,33,34,-20,-34,-33,-32,-31,-30,-29	21	23S Ribosomal RNA	23S Ribosomal RNA	23S Ribosomal RNA	haloarcula marismortui	haloarcula marismortui	haloarcula marismortui	O3'-O2'(hydroxyl)[2.93]_O2'(hydroxyl)-O2'(hydroxyl)[2.72]_O2'(hydroxyl)-O2(carbonyl)[2.52]	N1-O2'(hydroxyl)[2.67]_N3-N2(amino)[3.15]	(2,2)	4	8	7	7	1	0	0	0	1		t.S
4v9f.cif1	intra	0	269	0.A.536.	0.C.2061.	0.G.2075.	WC	19-XIX	cWW	cW-W	I	A|C-G	JP	S	S	LC	LC	SM	UCGAGCG	GUACAUU	GGAGUCU	abAB	1,2,-1,-2	1	23S Ribosomal RNA	23S Ribosomal RNA	23S Ribosomal RNA	haloarcula marismortui	haloarcula marismortui	haloarcula marismortui	O2'(hydroxyl)-O2'(hydroxyl)[2.58]	N1-O2'(hydroxyl)[2.55]_N3-N2(amino)[3.10]	(1,1)	3	8	2	2	0	0	0	0	0		tSS
4v9f.cif1	intra	108	270	0.A.551.	0.G.1322.	0.C.1335.	WC	19-XIX	cWW	cW-W	II	A|G-C	IC	S	S	LR	LR	SM	UACAAGG	GCAGGGG	CUCCUGU				23S Ribosomal RNA	23S Ribosomal RNA	23S Ribosomal RNA	haloarcula marismortui	haloarcula marismortui	haloarcula marismortui		O2'(hydroxyl)-O2'(hydroxyl)[2.82]_N3-O2'(hydroxyl)[2.73]	(2,2)	3	4	8	8	0	0	0	0	0
4v9f.cif1	intra	108	270	0.A.552.	0.G.1323.	0.C.1334.	WC	19-XIX	cWW	cW-W	I	A|G-C	IC	S	S	LR	LR	SM	ACAAGGU	CAGGGGC	GCUCCUG				23S Ribosomal RNA	23S Ribosomal RNA	23S Ribosomal RNA	haloarcula marismortui	haloarcula marismortui	haloarcula marismortui	N1-O2'(hydroxyl)[2.78]_N3-N2(amino)[3.24]	O2'(hydroxyl)-O2'(hydroxyl)[2.77]_O2'(hydroxyl)-O2(carbonyl)[2.92]	(2,2)	3	4	8	8	0	0	0	0	0	tSS		Interior Loop	Stem
4v9f.cif1	intra	109	271	0.A.565.	0.A.1092.	0.U.1264.	WC	20-XX	cWW	cW-W	II	A|A-U	IC	S	S	LR	LR	SM	ACGAAUG	GAUAGGU	ACCUGUC				23S Ribosomal RNA	23S Ribosomal RNA	23S Ribosomal RNA	haloarcula marismortui	haloarcula marismortui	haloarcula marismortui		O2'(hydroxyl)-O3'[3.17]_O2'(hydroxyl)-O2'(hydroxyl)[2.75]_N3-O2'(hydroxyl)[2.67]	(2,2)	3	9	7	7	0	0	0	0	0		cSS
4v9f.cif1	intra	109	271	0.A.566.	0.G.1093.	0.C.1263.	WC	19-XIX	cWW	cW-W	I	A|G-C	IC	S	S	LR	LR	SM	CGAAUGA	AUAGGUU	GACCUGU				23S Ribosomal RNA	23S Ribosomal RNA	23S Ribosomal RNA	haloarcula marismortui	haloarcula marismortui	haloarcula marismortui	N1-O2'(hydroxyl)[2.72]_N3-N2(amino)[3.24]	O2'(hydroxyl)-O2'(hydroxyl)[2.81]_O2'(hydroxyl)-O2(carbonyl)[3.17]	(2,2)	3	9	7	7	0	0	0	0	0	tSS		Interior Loop	Stem
4v9f.cif1	intra	0	272	0.A.580.	0.G.1110.	0.C.1253.	WC	19-XIX	cWW	cW-W	I	A|G-C	HC	S	S	LR	LR	SM	GCGAGUC	AGUGUGG	CCACCAC	abAB	1,2,3,-1,-3,-2	2	23S Ribosomal RNA	23S Ribosomal RNA	23S Ribosomal RNA	haloarcula marismortui	haloarcula marismortui	haloarcula marismortui	O2'(hydroxyl)-O2'(hydroxyl)[2.85]_N3-N2(amino)[3.10]	N1-O2'(hydroxyl)[2.50]	(1,1)	3	4	6	6	1	0	0	0	1	cSS	tWS	Hairpin	Interior Loop
4v9f.cif1	intra	110	273	0.A.643.	0.C.762.	0.G.902.	WC	19-XIX	cWW	cW-W	I	A|C-G	JC	S	S	LC	LC	SM	GGGAGUG	CGACCCG	CUGGUUC				23S Ribosomal RNA	23S Ribosomal RNA	23S Ribosomal RNA	haloarcula marismortui	haloarcula marismortui	haloarcula marismortui	O2'(hydroxyl)-O2'(hydroxyl)[2.58]_O2'(hydroxyl)-O2(carbonyl)[2.81]	N1-O2'(hydroxyl)[2.59]_N3-N2(amino)[2.98]	(2,2)	4	4	2	2	1	0	0	0	1		tSS
4v9f.cif1	intra	111	274	0.A.665.	0.C.208.	0.G.231.	WC	19-XIX	cWW	cW-W	X	A|C-G	IC	S	S	LR	LR	SM	UCUAACC	UGUCGUU	CGCGAUA				23S Ribosomal RNA	23S Ribosomal RNA	23S Ribosomal RNA	haloarcula marismortui	haloarcula marismortui	haloarcula marismortui		N6(amino)-O2'(hydroxyl)[3.16]	(3,2)	4	3	5	5	0	0	1	0	1
4v9f.cif1	intra	111	274	0.A.666.	0.C.208.	0.G.231.	WC	19-XIX	cWW	cW-W	I	A|C-G	IC	S	S	LR	LR	SM	CUAACCG	UGUCGUU	CGCGAUA				23S Ribosomal RNA	23S Ribosomal RNA	23S Ribosomal RNA	haloarcula marismortui	haloarcula marismortui	haloarcula marismortui	O3'-O2'(hydroxyl)[3.53]_O2'(hydroxyl)-O2'(hydroxyl)[2.84]_O2'(hydroxyl)-O2(carbonyl)[2.81]	N1-O2'(hydroxyl)[2.75]_N3-N2(amino)[2.94]	(3,2)	4	3	5	5	0	0	1	0	1		tSS	Interior Loop	Stem
4v9f.cif1	intra	0	275	0.A.674.	0.C.36.	0.G.446.	WC	19-XIX	cWW	cW-W	X	A|C-G	HC	S	S	LR	LR	SM	AGUAUCC	GCUCAGG	CCUGAGA	abAcdeDfgFEChBHiGI	1,2,3,4,5,6,7,-6,-5,-4,-3,-2,-1,8,9,10,11,12,13,14,-13,15,16,17,18,19,20,-19,-18,-17,-16,-15,-14,-12,-11,-10,-9,-8,21,22,23,24,25,26,27,28,-7,-28,-27,-26,-25,-24,-23,-22,-21,29,30,31,32,33,34,-20,-34,-33,-32,-31,-30,-29	4	23S Ribosomal RNA	23S Ribosomal RNA	23S Ribosomal RNA	haloarcula marismortui	haloarcula marismortui	haloarcula marismortui	N6(amino)-O2(carbonyl)[3.14]_N1-O2'(hydroxyl)[2.58]		(1,1)	3	5	6	6	0	1	0	0	1	cWS
4v9f.cif1	intra	111	274	0.A.682.	0.G.209.	0.C.230.	WC	19-XIX	cWW	cW-W	I	A|G-C	IC	S	S	LR	LR	SM	GGGAGGC	GUCGUUA	ACGCGAU				23S Ribosomal RNA	23S Ribosomal RNA	23S Ribosomal RNA	haloarcula marismortui	haloarcula marismortui	haloarcula marismortui	O2'(hydroxyl)-N2(amino)[3.59]	O3'-O2'(hydroxyl)[2.93]_O2'(hydroxyl)-O2'(hydroxyl)[2.75]_O2'(hydroxyl)-O2(carbonyl)[2.72]	(3,2)	4	3	5	5	1	0	0	0	1			Interior Loop	Stem
4v9f.cif1	intra	0	276	0.A.692.	0.C.2439.	0.G.2453.	WC	19-XIX	cWW	cW-W	X	A|C-G	HC	S	S	LR	LR	SM	GGGAAAC	UAGCCUG	CGGGCAA	abAcdeDfgFEChBHiGI	1,2,3,4,5,6,7,-6,-5,-4,-3,-2,-1,8,9,10,11,12,13,14,-13,15,16,17,18,19,20,-19,-18,-17,-16,-15,-14,-12,-11,-10,-9,-8,21,22,23,24,25,26,27,28,-7,-28,-27,-26,-25,-24,-23,-22,-21,29,30,31,32,33,34,-20,-34,-33,-32,-31,-30,-29	28	23S Ribosomal RNA	23S Ribosomal RNA	23S Ribosomal RNA	haloarcula marismortui	haloarcula marismortui	haloarcula marismortui		N1-N2(amino)[2.95]_N3-O2'(hydroxyl)[2.77]	(1,1)	3	4	5	5	1	0	0	0	1		cWS
4v9f.cif1	intra	0	277	0.A.698.	0.C.729.	0.G.742.	WC	19-XIX	cWW	cW-W	I	A|C-G	JC	S	S	LC	LC	SM	CCGACAU	CGCCGUC	GGCGGGG				23S Ribosomal RNA	23S Ribosomal RNA	23S Ribosomal RNA	haloarcula marismortui	haloarcula marismortui	haloarcula marismortui	O3'-O2'(hydroxyl)[2.94]_O2'(hydroxyl)-O2'(hydroxyl)[2.63]_O2'(hydroxyl)-O2(carbonyl)[3.05]	N1-O2'(hydroxyl)[2.62]_N3-N2(amino)[3.09]	(1,1)	3	5	6	6	0	0	0	0	0		tWS
4v9f.cif1	intra	112	278	0.A.736.	0.A.2382.	0.U.2406.	WC	20-XX	cWW	cW-W	II	A|A-U	HC	S	S	LR	LR	SM	UUCAAGG	GACAGUG	CGCUGAC				23S Ribosomal RNA	23S Ribosomal RNA	23S Ribosomal RNA	haloarcula marismortui	haloarcula marismortui	haloarcula marismortui		O2'(hydroxyl)-O3'[3.38]_O2'(hydroxyl)-O2'(hydroxyl)[3.05]_N3-O2'(hydroxyl)[2.79]	(2,2)	3	4	9	9	0	0	0	0	0
4v9f.cif1	intra	112	278	0.A.737.	0.G.2383.	0.C.2405.	WC	19-XIX	cWW	cW-W	I	A|G-C	HC	S	S	LR	LR	SM	UCAAGGG	ACAGUGU	ACGCUGA				23S Ribosomal RNA	23S Ribosomal RNA	23S Ribosomal RNA	haloarcula marismortui	haloarcula marismortui	haloarcula marismortui	N1-O2'(hydroxyl)[3.36]_N3-N2(amino)[3.53]	O2'(hydroxyl)-O2'(hydroxyl)[2.93]	(2,2)	3	4	9	9	0	0	0	0	0	tWS
4v9f.cif1	intra	113	279	0.A.766.	0.A.2108.	0.U.2478.	WC	20-XX	cWW	cW-W	X	A|A-U	IC	S	S	LR	LR	SM	CCGAAUC	CCUAUGG	CCCUAGG	abAcdeDfgFEChBHiGI	1,2,3,4,5,6,7,-6,-5,-4,-3,-2,-1,8,9,10,11,12,13,14,-13,15,16,17,18,19,20,-19,-18,-17,-16,-15,-14,-12,-11,-10,-9,-8,21,22,23,24,25,26,27,28,-7,-28,-27,-26,-25,-24,-23,-22,-21,29,30,31,32,33,34,-20,-34,-33,-32,-31,-30,-29	24	23S Ribosomal RNA	23S Ribosomal RNA	23S Ribosomal RNA	haloarcula marismortui	haloarcula marismortui	haloarcula marismortui		O4'-O2'(hydroxyl)[3.12]_N3-O2'(hydroxyl)[2.56]	(2,2)	5	5	4	4	0	0	0	0	0		cSS
4v9f.cif1	intra	113	279	0.A.767.	0.G.2110.	0.C.2477.	WC	19-XIX	cWW	cW-W	I	A|G-C	IC	S	S	LR	LR	SM	CGAAUCC	UAUGGAG	ACCCUAG	abAcdeDfgFEChBHiGI	1,2,3,4,5,6,7,-6,-5,-4,-3,-2,-1,8,9,10,11,12,13,14,-13,15,16,17,18,19,20,-19,-18,-17,-16,-15,-14,-12,-11,-10,-9,-8,21,22,23,24,25,26,27,28,-7,-28,-27,-26,-25,-24,-23,-22,-21,29,30,31,32,33,34,-20,-34,-33,-32,-31,-30,-29	25	23S Ribosomal RNA	23S Ribosomal RNA	23S Ribosomal RNA	haloarcula marismortui	haloarcula marismortui	haloarcula marismortui	N1-O2'(hydroxyl)[2.77]_N3-N2(amino)[3.04]	O2'(hydroxyl)-O2'(hydroxyl)[2.78]_O2'(hydroxyl)-O2(carbonyl)[3.22]	(2,2)	5	5	2	2	0	0	0	0	0	tSS		Interior Loop	Interior Loop
4v9f.cif1	intra	114	280	0.A.776.	0.G.871.	0.C.879.	WC	19-XIX	cWW	cW-W	X	A|G-C	JC	S	S	LC	LC	SM	ACGAUCU	GGGGUGA	AGGCCCA				23S Ribosomal RNA	23S Ribosomal RNA	23S Ribosomal RNA	haloarcula marismortui	haloarcula marismortui	haloarcula marismortui	N6(amino)-O2'(hydroxyl)[3.30]_N6(amino)-N3[3.16]_N1-N2(amino)[2.99]		(2,2)	4	5	3	3	0	0	0	0	0	tWS
4v9f.cif1	intra	0	281	0.A.827.	0.A.788.	0.U.858.	WC	20-XX	cWW	cW-W	X	A|A-U	JC	S	S	LC	LC	SM	GUUAGAG	UGGACAA	UGAUCUA				23S Ribosomal RNA	23S Ribosomal RNA	23S Ribosomal RNA	haloarcula marismortui	haloarcula marismortui	haloarcula marismortui	N3-O2'(hydroxyl)[3.51]		(1,1)	3	4	9	9	0	0	0	0	0
4v9f.cif1	intra	114	280	0.A.867.	0.G.870.	0.C.880.	WC	19-XIX	cWW	cW-W	I	A|G-C	JC	S	S	LC	LC	SM	UGUAGGG	AGGGGUG	GGCCCAU				23S Ribosomal RNA	23S Ribosomal RNA	23S Ribosomal RNA	haloarcula marismortui	haloarcula marismortui	haloarcula marismortui	N3-N2(amino)[3.07]	N1-O2'(hydroxyl)[2.66]	(2,2)	4	3	3	3	0	0	0	0	0	cSS	tWS
4v9f.cif1	intra	0	282	0.A.874.	0.G.1832.	0.C.1844.	WC	19-XIX	cWW	cW-W	I	A|G-C	HC	S	S	LR	LR	SM	GUGAAAG	ACUGUCU	CAACAUA				23S Ribosomal RNA	23S Ribosomal RNA	23S Ribosomal RNA	haloarcula marismortui	haloarcula marismortui	haloarcula marismortui	N1-O2'(hydroxyl)[2.58]_N3-N2(amino)[2.93]	O2'(hydroxyl)-O2'(hydroxyl)[2.61]_O2'(hydroxyl)-O2(carbonyl)[2.77]	(1,1)	3	5	2	2	1	0	0	0	1	tSS		Hairpin	Stem
4v9f.cif1	intra	0	283	0.A.923.	0.C.2106.	0.G.2480.	WC	19-XIX	cWW	cW-W	X	A|C-G	HC	S	S	LR	LR	SM	CGAAGCA	ACCCUAU	CUAGGGA	abAcdeDfgFEChBHiGI	1,2,3,4,5,6,7,-6,-5,-4,-3,-2,-1,8,9,10,11,12,13,14,-13,15,16,17,18,19,20,-19,-18,-17,-16,-15,-14,-12,-11,-10,-9,-8,21,22,23,24,25,26,27,28,-7,-28,-27,-26,-25,-24,-23,-22,-21,29,30,31,32,33,34,-20,-34,-33,-32,-31,-30,-29	24	23S Ribosomal RNA	23S Ribosomal RNA	23S Ribosomal RNA	haloarcula marismortui	haloarcula marismortui	haloarcula marismortui		N6(amino)-N3[2.98]_N1-O2'(hydroxyl)[2.55]	(1,1)	3	4	4	4	0	1	0	0	1		cWS
4v9f.cif1	intra	115	284	0.A.943.	0.G.941.	0.C.1025.	WC	19-XIX	cWW	cW-W	X	A|G-C	BC	S	S	LC	LC	SM	GGUAGUC	GAGGUAG	ACGCUGU				23S Ribosomal RNA	23S Ribosomal RNA	23S Ribosomal RNA	haloarcula marismortui	haloarcula marismortui	haloarcula marismortui		N6(amino)-O2(carbonyl)[3.05]	(2,3)	4	1	3	3	0	0	0	0	0		tWS
4v9f.cif1	intra	115	284	0.A.943.	0.U.942.	0.G.1024.	WB	28-XXVIII	cWW	cW-W	X	A|U-G	BC	S	S	LC	LC	SM	GGUAGUC	AGGUAGU	GACGCUG				23S Ribosomal RNA	23S Ribosomal RNA	23S Ribosomal RNA	haloarcula marismortui	haloarcula marismortui	haloarcula marismortui	N1*O2(carbonyl)[3.38]	N1-N2(amino)[2.94]	(2,3)	4	1	3	3	0	0	0	0	0		cWW
4v9f.cif1	intra	0	285	0.A.961.	0.G.958.	0.C.1008.	WC	19-XIX	cWW	cW-W	X	A|G-C	IC	S	S	LC	LC	SM	GCGACCG	AGAGCGA	AAACUCC				23S Ribosomal RNA	23S Ribosomal RNA	23S Ribosomal RNA	haloarcula marismortui	haloarcula marismortui	haloarcula marismortui	N6(amino)-O2'(hydroxyl)[2.80]_N6(amino)-N3[2.99]_N1-N2(amino)[3.00]		(1,1)	3	5	2	2	1	0	0	0	1	tWS
4v9f.cif1	intra	116	286	0.A.1006.	0.C.2298.	0.G.2310.	WC	19-XIX	cWW	cW-W	II	A|C-G	IC	S	S	LR	LR	SM	UCAAACU	GCUCGAA	AUCGAGC				23S Ribosomal RNA	23S Ribosomal RNA	23S Ribosomal RNA	haloarcula marismortui	haloarcula marismortui	haloarcula marismortui	O2'(hydroxyl)-O3'[3.16]_O2'(hydroxyl)-O2'(hydroxyl)[2.52]_N3-O2'(hydroxyl)[2.59]		(2,2)	3	3	6	6	0	0	0	0	0
4v9f.cif1	intra	116	286	0.A.1007.	0.U.2297.	0.A.2311.	WC	20-XX	cWW	cW-W	I	A|U-A	IC	S	S	LR	LR	SM	CAAACUC	CGCUCGA	UCGAGCG				23S Ribosomal RNA	23S Ribosomal RNA	23S Ribosomal RNA	haloarcula marismortui	haloarcula marismortui	haloarcula marismortui	O2'(hydroxyl)-O2'(hydroxyl)[2.77]	N1-O2'(hydroxyl)[2.65]	(2,2)	3	3	6	6	0	0	0	0	0
4v9f.cif1	intra	115	284	0.A.1032.	0.G.940.	0.U.1026.	WB	28-XXVIII	cWW	cW-W	I	A|G-U	IC	S	S	LC	LC	SM	UUGACGC	CGAGGUA	CGCUGUU				23S Ribosomal RNA	23S Ribosomal RNA	23S Ribosomal RNA	haloarcula marismortui	haloarcula marismortui	haloarcula marismortui	N1-O2'(hydroxyl)[2.44]_N3-N2(amino)[3.02]		(2,3)	4	7	3	3	0	0	1	0	1	tSS
4v9f.cif1	intra	117	287	0.A.1057.	0.U.2492.	0.G.2529.	WB	28-XXVIII	cWW	cW-W	II	A|U-G	HC	S	S	LR	LR	SM	GGUAAGC	GAGUCGU	CUUGCUA				23S Ribosomal RNA	23S Ribosomal RNA	23S Ribosomal RNA	haloarcula marismortui	haloarcula marismortui	haloarcula marismortui	O2'(hydroxyl)-O3'[2.80]_O2'(hydroxyl)-O2'(hydroxyl)[2.78]_N3-O2'(hydroxyl)[2.75]		(2,2)	3	5	3	3	1	0	0	0	1
4v9f.cif1	intra	117	287	0.A.1058.	0.G.2491.	0.C.2530.	WC	19-XIX	cWW	cW-W	I	A|G-C	HC	S	S	LR	LR	SM	GUAAGCC	AGAGUCG	UUGCUAC				23S Ribosomal RNA	23S Ribosomal RNA	23S Ribosomal RNA	haloarcula marismortui	haloarcula marismortui	haloarcula marismortui	O2'(hydroxyl)-O2'(hydroxyl)[2.82]_N3-N2(amino)[3.02]	N1-O2'(hydroxyl)[3.01]	(2,2)	3	5	3	3	1	0	0	0	1	cSS		Hairpin	Stem
4v9f.cif1	intra	118	288	0.A.1078.	0.A.2067.	0.U.2078.	WC	20-XX	cWW	cW-W	II	A|A-U	HC	S	S	LR	LR	SM	GGGAACA	UCCAGUG	GUCUGGA	abAB	1,2,-1,-2	2	23S Ribosomal RNA	23S Ribosomal RNA	23S Ribosomal RNA	haloarcula marismortui	haloarcula marismortui	haloarcula marismortui		O2'(hydroxyl)-O3'[3.46]_O2'(hydroxyl)-O2'(hydroxyl)[2.76]_N3-O2'(hydroxyl)[2.70]	(2,2)	3	6	5	5	1	1	0	0	1
4v9f.cif1	intra	118	288	0.A.1079.	0.G.2068.	0.C.2077.	WC	19-XIX	cWW	cW-W	I	A|G-C	HC	S	S	LR	LR	SM	GGAACAA	CCAGUGC	AGUCUGG	abAB	1,2,-1,-2	2	23S Ribosomal RNA	23S Ribosomal RNA	23S Ribosomal RNA	haloarcula marismortui	haloarcula marismortui	haloarcula marismortui	N1-O2'(hydroxyl)[2.49]_N3-N2(amino)[3.23]	O2'(hydroxyl)-O2'(hydroxyl)[2.79]_O2'(hydroxyl)-O2(carbonyl)[3.32]	(2,2)	3	6	5	5	1	1	0	0	1	tWS
4v9f.cif1	intra	119	289	0.A.1081.	0.G.1045.	0.C.1069.	WC	19-XIX	cWW	cW-W	II	A|G-C	HC	S	S	LR	LR	SM	AACAACC	UCCGGUG	UACCAGG				23S Ribosomal RNA	23S Ribosomal RNA	23S Ribosomal RNA	haloarcula marismortui	haloarcula marismortui	haloarcula marismortui		O2'(hydroxyl)-O2'(hydroxyl)[2.78]_N3-O2'(hydroxyl)[2.64]	(2,2)	3	6	10	10	0	1	0	0	1		cWS
4v9f.cif1	intra	119	289	0.A.1082.	0.G.1046.	0.C.1068.	WC	19-XIX	cWW	cW-W	I	A|G-C	HC	S	S	LR	LR	SM	ACAACCC	CCGGUGC	GUACCAG				23S Ribosomal RNA	23S Ribosomal RNA	23S Ribosomal RNA	haloarcula marismortui	haloarcula marismortui	haloarcula marismortui	N1-O2'(hydroxyl)[2.55]_N3-N2(amino)[2.89]	O2'(hydroxyl)-O2'(hydroxyl)[2.77]_O2'(hydroxyl)-O2(carbonyl)[3.12]	(2,2)	3	6	10	10	0	0	0	0	0	tSS		Hairpin	Stem
4v9f.cif1	intra	120	290	0.A.1097.	0.G.1074.	0.C.1085.	WC	19-XIX	cWW	cW-W	II	A|G-C	IC	S	S	LR	LR	SM	GUUAAGG	GGAGGGG	ACCCAGA				23S Ribosomal RNA	23S Ribosomal RNA	23S Ribosomal RNA	haloarcula marismortui	haloarcula marismortui	haloarcula marismortui		O2'(hydroxyl)-O3'[3.42]_O2'(hydroxyl)-O2'(hydroxyl)[2.84]_N3-O2'(hydroxyl)[2.60]	(5,5)	7	3	3	3	0	0	0	0	0		cSS
4v9f.cif1	intra	120	290	0.A.1098.	0.G.1075.	0.C.1084.	WC	19-XIX	cWW	cW-W	I	A|G-C	IC	S	S	LR	LR	SM	UUAAGGU	GAGGGGA	AACCCAG				23S Ribosomal RNA	23S Ribosomal RNA	23S Ribosomal RNA	haloarcula marismortui	haloarcula marismortui	haloarcula marismortui	N1-O2'(hydroxyl)[2.86]_N3-N2(amino)[3.13]	O2'(hydroxyl)-O2'(hydroxyl)[2.79]_O2'(hydroxyl)-O2(carbonyl)[2.99]	(5,5)	7	3	3	3	0	0	0	0	0	tSS		Interior Loop	Stem
4v9f.cif1	intra	120	290	0.A.1106.	0.G.1099.	0.C.1257.	WC	19-XIX	cWW	cW-W	II	A|G-C	IP	S	S	LR	LR	SM	CCCAAGU	UAAGGUC	CACCGAG				23S Ribosomal RNA	23S Ribosomal RNA	23S Ribosomal RNA	haloarcula marismortui	haloarcula marismortui	haloarcula marismortui		O2'(hydroxyl)-O3'[3.02]_O2'(hydroxyl)-O2'(hydroxyl)[2.81]_N3-O2'(hydroxyl)[2.74]	(5,5)	7	5	3	3	0	0	0	0	0		cSS
4v9f.cif1	intra	120	290	0.A.1107.	0.G.1100.	0.C.1256.	WC	19-XIX	cWW	cW-W	I	A|G-C	IP	S	S	LR	LR	SM	CCAAGUG	AAGGUCC	CCACCGA				23S Ribosomal RNA	23S Ribosomal RNA	23S Ribosomal RNA	haloarcula marismortui	haloarcula marismortui	haloarcula marismortui	N1-O2'(hydroxyl)[2.62]_N3-N2(amino)[3.03]	O2'(hydroxyl)-O2'(hydroxyl)[2.57]_O2'(hydroxyl)-O2(carbonyl)[3.07]	(5,5)	7	5	3	3	0	0	0	0	0	tSS		Interior Loop	Stem
4v9f.cif1	intra	120	290	0.A.1124.	0.G.1076.	0.C.1083.	WC	19-XIX	cWW	cW-W	X	A|G-C	IP	S	S	LR	LR	SM	GUAAUCC	AGGGGAA	CAACCCA				23S Ribosomal RNA	23S Ribosomal RNA	23S Ribosomal RNA	haloarcula marismortui	haloarcula marismortui	haloarcula marismortui		N6(amino)-O2(carbonyl)[2.76]_N1-O2'(hydroxyl)[2.59]	(5,5)	7	11	3	3	1	0	0	0	1		cWS
4v9f.cif1	intra	121	291	0.A.1132.	0.U.2499.	0.A.2521.	WC	20-XX	cWW	cW-W	II	A|U-A	IP	S	S	LR	LR	SM	CUGAAGG	CACUCGC	CCGAGUG				23S Ribosomal RNA	23S Ribosomal RNA	23S Ribosomal RNA	haloarcula marismortui	haloarcula marismortui	haloarcula marismortui		O2'(hydroxyl)-O3'[3.09]_O2'(hydroxyl)-O2'(hydroxyl)[3.01]_N3-O2'(hydroxyl)[2.52]	(3,3)	4	11	6	6	0	0	0	0	0		cSS
4v9f.cif1	intra	121	291	0.A.1133.	0.C.2500.	0.G.2520.	WC	19-XIX	cWW	cW-W	I	A|C-G	IP	S	S	LR	LR	SM	UGAAGGU	ACUCGCA	ACCGAGU				23S Ribosomal RNA	23S Ribosomal RNA	23S Ribosomal RNA	haloarcula marismortui	haloarcula marismortui	haloarcula marismortui	N1-O2'(hydroxyl)[2.80]	N3-N2(amino)[3.41]	(3,3)	4	11	6	6	0	0	0	0	0	tWS	cSS	Interior Loop	Stem
4v9f.cif1	intra	0	292	0.A.1152.	0.C.1147.	0.G.1216.	WC	19-XIX	cWW	cW-W	I	A|C-G	IC	S	S	LC	LC	SM	UAGACAG	AGCCCUA	CGAGGUU				23S Ribosomal RNA	23S Ribosomal RNA	23S Ribosomal RNA	haloarcula marismortui	haloarcula marismortui	haloarcula marismortui	O2'(hydroxyl)-O2'(hydroxyl)[2.90]	N1-O2'(hydroxyl)[2.77]_N3-N2(amino)[2.90]	(1,1)	3	7	10	10	0	0	0	0	0		tSS
4v9f.cif1	intra	122	293	0.A.1188.	0.G.1158.	0.C.1209.	WC	19-XIX	cWW	cW-W	II	A|G-C	JC	S	S	LC	LC	SM	UCUAAGA	GCCGGGA	UACCGGC				23S Ribosomal RNA	23S Ribosomal RNA	23S Ribosomal RNA	haloarcula marismortui	haloarcula marismortui	haloarcula marismortui		O2'(hydroxyl)-O3'[3.49]_O2'(hydroxyl)-O2'(hydroxyl)[3.11]_N3-O2'(hydroxyl)[2.88]	(2,2)	3	8	5	5	0	0	0	0	0
4v9f.cif1	intra	122	293	0.A.1189.	0.G.1159.	0.C.1208.	WC	19-XIX	cWW	cW-W	I	A|G-C	JC	S	S	LC	LC	SM	CUAAGAA	CCGGGAG	UUACCGG				23S Ribosomal RNA	23S Ribosomal RNA	23S Ribosomal RNA	haloarcula marismortui	haloarcula marismortui	haloarcula marismortui	N1-O2'(hydroxyl)[2.82]	O2'(hydroxyl)-O2'(hydroxyl)[2.54]	(2,2)	3	8	5	5	0	0	0	0	0	tWS
4v9f.cif1	intra	121	291	0.A.1231.	0.C.2498.	0.G.2522.	WC	19-XIX	cWW	cW-W	X	A|C-G	IP	S	S	LR	LR	SM	CCAAAAU	UCACUCG	CGAGUGG				23S Ribosomal RNA	23S Ribosomal RNA	23S Ribosomal RNA	haloarcula marismortui	haloarcula marismortui	haloarcula marismortui	N6(amino)-O2(carbonyl)[2.80]_N1-O2'(hydroxyl)[2.58]		(3,3)	4	10	6	6	0	0	0	0	0	cWS
4v9f.cif1	intra	123	294	0.A.1232.	0.C.2551.	0.G.2603.	WC	19-XIX	cWW	cW-W	X	A|C-G	IP	S	S	LR	LR	SM	CAAAAUG	CCUCCAU	AAGGAGG				23S Ribosomal RNA	23S Ribosomal RNA	23S Ribosomal RNA	haloarcula marismortui	haloarcula marismortui	haloarcula marismortui	O4'-O2'(hydroxyl)[2.64]_N3-O2'(hydroxyl)[2.88]		(2,2)	3	10	5	5	0	0	0	0	0	cSS
4v9f.cif1	intra	123	294	0.A.1233.	0.U.2550.	0.A.2604.	WC	20-XX	cWW	cW-W	I	A|U-A	IP	S	S	LR	LR	SM	AAAAUGA	CCCUCCA	AGGAGGU				23S Ribosomal RNA	23S Ribosomal RNA	23S Ribosomal RNA	haloarcula marismortui	haloarcula marismortui	haloarcula marismortui	O2'(hydroxyl)-O2'(hydroxyl)[2.66]_O2'(hydroxyl)-O2(carbonyl)[2.75]	N1-O2'(hydroxyl)[2.63]	(2,2)	3	10	5	5	0	0	0	0	0
4v9f.cif1	intra	0	295	0.A.1247.	0.U.1122.	0.A.1242.	WC	20-XX	cWW	cW-W	I	A|U-A	IC	S	S	LC	LC	SM	UCAAAUC	GUGUAAU	GGGACUC	abAB	1,2,3,-1,-3,-2	3	23S Ribosomal RNA	23S Ribosomal RNA	23S Ribosomal RNA	haloarcula marismortui	haloarcula marismortui	haloarcula marismortui		N1-O2'(hydroxyl)[2.59]	(1,1)	3	4	2	2	0	0	0	0	0		tWS
4v9f.cif1	intra	0	296	0.A.1318.	0.U.27.	0.A.516.	WC	20-XX	cWW	cW-W	II	A|U-A	IC	JC	JCJP	LR	LR	SM	GGAAGCA	GAUUGCU	AGCAUGA				23S Ribosomal RNA	23S Ribosomal RNA	23S Ribosomal RNA	haloarcula marismortui	haloarcula marismortui	haloarcula marismortui	O2'(hydroxyl)-O3'[3.42]_O2'(hydroxyl)-O2'(hydroxyl)[2.86]_N3-O2'(hydroxyl)[2.78]		(1,1)	3	6	6	20	1	1	0	0	1
4v9f.cif1	intra	0	297	0.A.1330.	0.C.905.	0.G.1300.	WC	19-XIX	cWW	cW-W	I	A|C-G	HC	S	S	LR	LR	SM	GAGAGCU	GUUCCAA	UUGGCGC				23S Ribosomal RNA	23S Ribosomal RNA	23S Ribosomal RNA	haloarcula marismortui	haloarcula marismortui	haloarcula marismortui	O2'(hydroxyl)-O2'(hydroxyl)[2.74]_O2'(hydroxyl)-O2(carbonyl)[3.05]	N1-O2'(hydroxyl)[2.84]_N3-N2(amino)[2.98]	(1,1)	3	4	6	6	1	0	0	0	1		tSS	Hairpin	Stem
4v9f.cif1	intra	0	298	0.A.1357.	0.C.621.	0.G.634.	WC	19-XIX	cWW	cW-W	I	A|C-G	JC	S	S	LR	LR	SM	GAAAAUC	GUACGUU	AACGAGC				23S Ribosomal RNA	23S Ribosomal RNA	23S Ribosomal RNA	haloarcula marismortui	haloarcula marismortui	haloarcula marismortui	N1-O2'(hydroxyl)[2.60]		(1,1)	3	10	3	3	1	0	0	0	1
4v9f.cif1	intra	110	273	0.A.1358.	0.C.763.	0.G.901.	WC	19-XIX	cWW	cW-W	I	A|C-G	JC	S	S	LC	LC	SM	AAAAUCC	GACCCGA	GCUGGUU				23S Ribosomal RNA	23S Ribosomal RNA	23S Ribosomal RNA	haloarcula marismortui	haloarcula marismortui	haloarcula marismortui		O2'(hydroxyl)-O2'(hydroxyl)[2.80]_N3-N2(amino)[3.32]	(2,2)	4	10	2	2	0	0	0	0	0		cSS
4v9f.cif1	intra	0	299	0.A.1375.	0.C.1735.	0.G.2044.	WC	19-XIX	cWW	cW-W	II	A|C-G	JC	S	S	LR	LR	SM	AGCAGCG	AACCAAC	GUUGGGC				23S Ribosomal RNA	23S Ribosomal RNA	23S Ribosomal RNA	haloarcula marismortui	haloarcula marismortui	haloarcula marismortui		O2'(hydroxyl)-O3'[3.16]_O2'(hydroxyl)-O2'(hydroxyl)[2.75]_N3-O2'(hydroxyl)[2.82]	(1,1)	3	7	8	8	0	1	0	0	1		cWS
4v9f.cif1	intra	0	300	0.A.1381.	0.G.1401.	0.C.1721.	WC	19-XIX	cWW	cW-W	I	A|G-C	JC	S	S	LC	LC	SM	GAUAGUC	GACGGCC	GGCCUGU	abAcdeDfgFEChBHiGI	1,2,3,4,5,6,7,-6,-5,-4,-3,-2,-1,8,9,10,11,12,13,14,-13,15,16,17,18,19,20,-19,-18,-17,-16,-15,-14,-12,-11,-10,-9,-8,21,22,23,24,25,26,27,28,-7,-28,-27,-26,-25,-24,-23,-22,-21,29,30,31,32,33,34,-20,-34,-33,-32,-31,-30,-29	10	23S Ribosomal RNA	23S Ribosomal RNA	23S Ribosomal RNA	haloarcula marismortui	haloarcula marismortui	haloarcula marismortui	N1-O2'(hydroxyl)[2.88]_N3-N2(amino)[3.18]	O3'-O2'(hydroxyl)[2.84]_O2'(hydroxyl)-O2(carbonyl)[3.04]	(1,1)	3	7	4	4	0	0	0	0	0	t.S
4v9f.cif1	intra	0	301	0.A.1393.	0.C.1725.	0.G.2050.	WC	19-XIX	cWW	cW-W	X	A|C-G	HC	S	S	LR	LR	SM	AGAACCC	UGUCGGG	CCCGGUG				23S Ribosomal RNA	23S Ribosomal RNA	23S Ribosomal RNA	haloarcula marismortui	haloarcula marismortui	haloarcula marismortui	N6(amino)-O2(carbonyl)[3.20]_N1-O2'(hydroxyl)[2.60]		(1,1)	3	7	4	4	0	0	0	0	0	cWS
4v9f.cif1	intra	124	302	0.A.1458.	0.A.784.	0.U.862.	WC	20-XX	cWW	cW-W	II	A|A-U	IC	S	S	LR	LR	SM	CCUAAGU	CGCAUGG	CUAUGUG				23S Ribosomal RNA	23S Ribosomal RNA	23S Ribosomal RNA	haloarcula marismortui	haloarcula marismortui	haloarcula marismortui	O2'(hydroxyl)-O2'(hydroxyl)[2.66]_N3-O2'(hydroxyl)[2.66]		(2,2)	3	3	9	9	0	0	0	0	0
4v9f.cif1	intra	124	302	0.A.1459.	0.C.783.	0.G.863.	WC	19-XIX	cWW	cW-W	I	A|C-G	IC	S	S	LR	LR	SM	CUAAGUC	ACGCAUG	UAUGUGU				23S Ribosomal RNA	23S Ribosomal RNA	23S Ribosomal RNA	haloarcula marismortui	haloarcula marismortui	haloarcula marismortui	O2'(hydroxyl)-O2'(hydroxyl)[2.67]_O2'(hydroxyl)-O2(carbonyl)[3.21]	N1-O2'(hydroxyl)[2.69]_N3-N2(amino)[3.07]	(2,2)	3	3	9	9	0	0	0	0	0		tSS	Interior Loop	Stem
4v9f.cif1	intra	0	303	0.A.1470.	0.G.157.	0.C.179.	WC	19-XIX	cWW	cW-W	X	A|G-C	HC	S	S	LR	LR	SM	CGCAACU	CCCGAGA	UAUCGGG				23S Ribosomal RNA	23S Ribosomal RNA	23S Ribosomal RNA	haloarcula marismortui	haloarcula marismortui	haloarcula marismortui	N1-N2(amino)[3.10]_N3-O2'(hydroxyl)[2.65]		(1,1)	3	5	5	5	1	0	0	0	1	cWS
4v9f.cif1	intra	125	304	0.A.1476.	0.C.1467.	0.G.1475.	WC	19-XIX	cWW	cW-W	X	A|C-G	IC	S	S	LC	LC	SM	UCGACUG	CACCGCA	CUCGACU				23S Ribosomal RNA	23S Ribosomal RNA	23S Ribosomal RNA	haloarcula marismortui	haloarcula marismortui	haloarcula marismortui	N6(amino)-O2(carbonyl)[2.97]	O4'-O2'(hydroxyl)[3.44]	(3,2)	4	2	2	2	0	0	0	0	0
4v9f.cif1	intra	0	305	0.A.1486.	0.G.1452.	0.C.1675.	WC	19-XIX	cWW	cW-W	X	A|G-C	IC	S	S	LR	LR	SM	CGAAAUG	GCCGGUC	GUCCGUA	abAcdeDfgFEChBHiGI	1,2,3,4,5,6,7,-6,-5,-4,-3,-2,-1,8,9,10,11,12,13,14,-13,15,16,17,18,19,20,-19,-18,-17,-16,-15,-14,-12,-11,-10,-9,-8,21,22,23,24,25,26,27,28,-7,-28,-27,-26,-25,-24,-23,-22,-21,29,30,31,32,33,34,-20,-34,-33,-32,-31,-30,-29	14	23S Ribosomal RNA	23S Ribosomal RNA	23S Ribosomal RNA	haloarcula marismortui	haloarcula marismortui	haloarcula marismortui	N1-N2(amino)[3.10]_N3-O2'(hydroxyl)[2.75]		(1,1)	3	5	3	3	1	0	0	0	1	cWS
4v9f.cif1	intra	0	306	0.A.1487.	0.U.1412.	0.G.1697.	WB	28-XXVIII	cWW	cW-W	I	A|U-G	IC	S	S	LR	LR	SM	GAAAUGG	GGAUAAG	GGUGUCC	abAcdeDfgFEChBHiGI	1,2,3,4,5,6,7,-6,-5,-4,-3,-2,-1,8,9,10,11,12,13,14,-13,15,16,17,18,19,20,-19,-18,-17,-16,-15,-14,-12,-11,-10,-9,-8,21,22,23,24,25,26,27,28,-7,-28,-27,-26,-25,-24,-23,-22,-21,29,30,31,32,33,34,-20,-34,-33,-32,-31,-30,-29	11	23S Ribosomal RNA	23S Ribosomal RNA	23S Ribosomal RNA	haloarcula marismortui	haloarcula marismortui	haloarcula marismortui		N3-N2(amino)[2.88]	(1,1)	3	5	4	4	1	0	0	0	1		tSS
4v9f.cif1	intra	126	307	0.A.1492.	0.C.1514.	0.G.1672.	WC	19-XIX	cWW	cW-W	II	A|C-G	JP	S	S	LC	LC	SM	GGGAAAC	UGCCAUC	GAUGUCC	abAcdeDfgFEChBHiGI	1,2,3,4,5,6,7,-6,-5,-4,-3,-2,-1,8,9,10,11,12,13,14,-13,15,16,17,18,19,20,-19,-18,-17,-16,-15,-14,-12,-11,-10,-9,-8,21,22,23,24,25,26,27,28,-7,-28,-27,-26,-25,-24,-23,-22,-21,29,30,31,32,33,34,-20,-34,-33,-32,-31,-30,-29	15	23S Ribosomal RNA	23S Ribosomal RNA	23S Ribosomal RNA	haloarcula marismortui	haloarcula marismortui	haloarcula marismortui	O2'(hydroxyl)-O2'(hydroxyl)[2.88]_N3-O2'(hydroxyl)[2.83]		(2,2)	5	3	8	8	1	0	0	0	1	cSS
4v9f.cif1	intra	126	307	0.A.1493.	0.G.1449.	0.C.1513.	WC	19-XIX	cWW	cW-W	I	A|G-C	JP	S	S	LC	LC	SM	GGAAACA	UUAGCCG	GUGCCAU	abAcdeDfgFEChBHiGI	1,2,3,4,5,6,7,-6,-5,-4,-3,-2,-1,8,9,10,11,12,13,14,-13,15,16,17,18,19,20,-19,-18,-17,-16,-15,-14,-12,-11,-10,-9,-8,21,22,23,24,25,26,27,28,-7,-28,-27,-26,-25,-24,-23,-22,-21,29,30,31,32,33,34,-20,-34,-33,-32,-31,-30,-29	13	23S Ribosomal RNA	23S Ribosomal RNA	23S Ribosomal RNA	haloarcula marismortui	haloarcula marismortui	haloarcula marismortui	N1-O2'(hydroxyl)[2.72]_N3-N2(amino)[3.02]	O2'(hydroxyl)-O2'(hydroxyl)[2.90]_O2'(hydroxyl)-O2(carbonyl)[2.94]	(2,2)	5	3	2	2	1	1	0	0	1	tSS
4v9f.cif1	intra	127	308	0.A.1501.	0.C.1421.	0.G.1443.	WC	19-XIX	cWW	cW-W	II	A|C-G	HC	S	S	LR	LR	SM	GUUAAUA	UUCCUCA	UGAGGGU				23S Ribosomal RNA	23S Ribosomal RNA	23S Ribosomal RNA	haloarcula marismortui	haloarcula marismortui	haloarcula marismortui	O2'(hydroxyl)-O2'(hydroxyl)[2.69]_N3-O2'(hydroxyl)[2.76]		(2,2)	3	8	6	6	0	1	0	0	1	cSS
4v9f.cif1	intra	127	308	0.A.1502.	0.C.1420.	0.G.1444.	WC	19-XIX	cWW	cW-W	I	A|C-G	HC	S	S	LR	LR	SM	UUAAUAU	GUUCCUC	GAGGGUU				23S Ribosomal RNA	23S Ribosomal RNA	23S Ribosomal RNA	haloarcula marismortui	haloarcula marismortui	haloarcula marismortui		N1-O2'(hydroxyl)[2.52]_N3-N2(amino)[3.33]	(2,2)	3	8	6	6	0	1	0	0	1		tWS
4v9f.cif1	intra	128	309	0.A.1572.	0.C.1495.	0.G.1510.	WC	19-XIX	cWW	cW-W	II	A|C-G	JCJP	S	S	LR	LR	SM	UCGAACC	AAACAGG	CCUGUGC				23S Ribosomal RNA	23S Ribosomal RNA	23S Ribosomal RNA	haloarcula marismortui	haloarcula marismortui	haloarcula marismortui	O2'(hydroxyl)-O3'[3.39]_O2'(hydroxyl)-O2'(hydroxyl)[2.91]_N3-O2'(hydroxyl)[2.72]		(2,2)	3	4	5	5	0	0	0	0	0
4v9f.cif1	intra	128	309	0.A.1573.	0.A.1494.	0.U.1511.	WC	20-XX	cWW	cW-W	X	A|A-U	JCJP	S	S	LR	LR	SM	CGAACCG	GAAACAG	CUGUGCC				23S Ribosomal RNA	23S Ribosomal RNA	23S Ribosomal RNA	haloarcula marismortui	haloarcula marismortui	haloarcula marismortui		N1-O2'(hydroxyl)[2.82]	(2,2)	3	4	5	5	0	0	0	0	0		tWS
4v9f.cif1	intra	0	310	0.A.1590.	0.G.1592.	0.C.1602.	WC	19-XIX	cWW	cW-W	X	A|G-C	IC	S	S	LC	LC	SM	UGGAAGC	GAAGCCG	UGGCAGG				23S Ribosomal RNA	23S Ribosomal RNA	23S Ribosomal RNA	haloarcula marismortui	haloarcula marismortui	haloarcula marismortui		N1-O2'(hydroxyl)[2.87]	(1,1)	3	4	3	3	1	0	0	0	1
4v9f.cif1	intra	129	311	0.A.1597.	0.C.1538.	0.G.1647.	WC	19-XIX	cWW	cW-W	X	A|C-G	HC	S	S	LR	LR	SM	CGUAAUG	GCCCUGG	CUGGGGC	abAcdeDfgFEChBHiGI	1,2,3,4,5,6,7,-6,-5,-4,-3,-2,-1,8,9,10,11,12,13,14,-13,15,16,17,18,19,20,-19,-18,-17,-16,-15,-14,-12,-11,-10,-9,-8,21,22,23,24,25,26,27,28,-7,-28,-27,-26,-25,-24,-23,-22,-21,29,30,31,32,33,34,-20,-34,-33,-32,-31,-30,-29	17	23S Ribosomal RNA	23S Ribosomal RNA	23S Ribosomal RNA	haloarcula marismortui	haloarcula marismortui	haloarcula marismortui		N6(amino)-N3[3.40]_N1-N2(amino)[3.39]	(2,1)	3	5	8	8	1	0	0	0	1		tWS
4v9f.cif1	intra	129	311	0.A.1598.	0.C.1538.	0.G.1647.	WC	19-XIX	cWW	cW-W	X	A|C-G	HC	S	S	LR	LR	SM	GUAAUGG	GCCCUGG	CUGGGGC	abAcdeDfgFEChBHiGI	1,2,3,4,5,6,7,-6,-5,-4,-3,-2,-1,8,9,10,11,12,13,14,-13,15,16,17,18,19,20,-19,-18,-17,-16,-15,-14,-12,-11,-10,-9,-8,21,22,23,24,25,26,27,28,-7,-28,-27,-26,-25,-24,-23,-22,-21,29,30,31,32,33,34,-20,-34,-33,-32,-31,-30,-29	17	23S Ribosomal RNA	23S Ribosomal RNA	23S Ribosomal RNA	haloarcula marismortui	haloarcula marismortui	haloarcula marismortui		N1-O2'(hydroxyl)[2.61]	(2,1)	3	5	8	8	1	0	0	0	1
4v9f.cif1	intra	130	312	0.A.1615.	0.G.1541.	0.C.1644.	WC	19-XIX	cWW	cW-W	II	A|G-C	IC	S	S	LR	LR	SM	ACGAACG	CUGGGGU	AACCUGG	abAcdeDfgFEChBHiGI	1,2,3,4,5,6,7,-6,-5,-4,-3,-2,-1,8,9,10,11,12,13,14,-13,15,16,17,18,19,20,-19,-18,-17,-16,-15,-14,-12,-11,-10,-9,-8,21,22,23,24,25,26,27,28,-7,-28,-27,-26,-25,-24,-23,-22,-21,29,30,31,32,33,34,-20,-34,-33,-32,-31,-30,-29	17	23S Ribosomal RNA	23S Ribosomal RNA	23S Ribosomal RNA	haloarcula marismortui	haloarcula marismortui	haloarcula marismortui		O2'(hydroxyl)-O3'[3.12]_O2'(hydroxyl)-O2'(hydroxyl)[2.70]_N3-O2'(hydroxyl)[2.80]	(2,2)	3	5	8	8	0	0	0	0	0
4v9f.cif1	intra	130	312	0.A.1616.	0.G.1542.	0.C.1643.	WC	19-XIX	cWW	cW-W	I	A|G-C	IC	S	S	LR	LR	SM	CGAACGG	UGGGGUC	CAACCUG	abAcdeDfgFEChBHiGI	1,2,3,4,5,6,7,-6,-5,-4,-3,-2,-1,8,9,10,11,12,13,14,-13,15,16,17,18,19,20,-19,-18,-17,-16,-15,-14,-12,-11,-10,-9,-8,21,22,23,24,25,26,27,28,-7,-28,-27,-26,-25,-24,-23,-22,-21,29,30,31,32,33,34,-20,-34,-33,-32,-31,-30,-29	17	23S Ribosomal RNA	23S Ribosomal RNA	23S Ribosomal RNA	haloarcula marismortui	haloarcula marismortui	haloarcula marismortui	N1-O2'(hydroxyl)[3.04]_N3-N2(amino)[3.05]	O2'(hydroxyl)-O2'(hydroxyl)[2.76]	(2,2)	3	5	8	8	0	0	0	0	0	tSS		Interior Loop	Interior Loop
4v9f.cif1	intra	131	313	0.A.1631.	0.C.1554.	0.G.1567.	WC	19-XIX	cWW	cW-W	II	A|C-G	JCJP	S	S	LC	LC	SM	GGAAACG	CGCCGGG	CCCGGUC	abAcdeDfgFEChBHiGI	1,2,3,4,5,6,7,-6,-5,-4,-3,-2,-1,8,9,10,11,12,13,14,-13,15,16,17,18,19,20,-19,-18,-17,-16,-15,-14,-12,-11,-10,-9,-8,21,22,23,24,25,26,27,28,-7,-28,-27,-26,-25,-24,-23,-22,-21,29,30,31,32,33,34,-20,-34,-33,-32,-31,-30,-29	19	23S Ribosomal RNA	23S Ribosomal RNA	23S Ribosomal RNA	haloarcula marismortui	haloarcula marismortui	haloarcula marismortui	O2'(hydroxyl)-O2'(hydroxyl)[2.90]_N3-O2'(hydroxyl)[2.56]		(2,2)	3	11	7	7	1	0	0	0	1	cWS
4v9f.cif1	intra	131	313	0.A.1632.	0.C.1553.	0.G.1568.	WC	19-XIX	cWW	cW-W	I	A|C-G	JCJP	S	S	LC	LC	SM	GAAACGU	ACGCCGG	CCGGUCG	abAcdeDfgFEChBHiGI	1,2,3,4,5,6,7,-6,-5,-4,-3,-2,-1,8,9,10,11,12,13,14,-13,15,16,17,18,19,20,-19,-18,-17,-16,-15,-14,-12,-11,-10,-9,-8,21,22,23,24,25,26,27,28,-7,-28,-27,-26,-25,-24,-23,-22,-21,29,30,31,32,33,34,-20,-34,-33,-32,-31,-30,-29	19	23S Ribosomal RNA	23S Ribosomal RNA	23S Ribosomal RNA	haloarcula marismortui	haloarcula marismortui	haloarcula marismortui	O2'(hydroxyl)-O2'(hydroxyl)[2.64]_O2'(hydroxyl)-O2(carbonyl)[3.33]	N1-O2'(hydroxyl)[2.77]_N3-N2(amino)[2.94]	(2,2)	3	11	7	7	1	0	0	0	1		tSS	Multi Loop	Stem
4v9f.cif1	intra	132	314	0.A.1657.	0.C.1456.	0.G.1489.	WC	19-XIX	cWW	cW-W	X	A|C-G	ICJP	S	S	LR	LR	SM	UGAAAAG	GUCCUAA	AAUGGGA				23S Ribosomal RNA	23S Ribosomal RNA	23S Ribosomal RNA	haloarcula marismortui	haloarcula marismortui	haloarcula marismortui		N1-N2(amino)[2.86]	(3,2)	3	9	2	2	1	0	0	0	1		tWS
4v9f.cif1	intra	132	314	0.A.1658.	0.C.1456.	0.G.1489.	WC	19-XIX	cWW	cW-W	II	A|C-G	ICJP	S	S	LR	LR	SM	GAAAAGA	GUCCUAA	AAUGGGA				23S Ribosomal RNA	23S Ribosomal RNA	23S Ribosomal RNA	haloarcula marismortui	haloarcula marismortui	haloarcula marismortui	O2'(hydroxyl)-O3'[2.79]_O2'(hydroxyl)-O2'(hydroxyl)[2.79]_N3-O2'(hydroxyl)[2.69]		(3,2)	3	9	2	2	1	0	0	0	1
4v9f.cif1	intra	132	314	0.A.1659.	0.C.1455.	0.G.1490.	WC	19-XIX	cWW	cW-W	I	A|C-G	ICJP	S	S	LR	LR	SM	AAAAGAC	GGUCCUA	AUGGGAA				23S Ribosomal RNA	23S Ribosomal RNA	23S Ribosomal RNA	haloarcula marismortui	haloarcula marismortui	haloarcula marismortui		N1-O2'(hydroxyl)[2.97]_N3-N2(amino)[3.23]	(3,2)	3	9	2	2	0	0	0	0	0
4v9f.cif1	intra	0	315	0.A.1685.	0.G.1416.	0.C.1679.	WC	19-XIX	cWW	cW-W	I	A|G-C	JCJP	S	S	LC	LC	SM	AGAACCG	AAGGGUU	GUACCGA	abAcdeDfgFEChBHiGI	1,2,3,4,5,6,7,-6,-5,-4,-3,-2,-1,8,9,10,11,12,13,14,-13,15,16,17,18,19,20,-19,-18,-17,-16,-15,-14,-12,-11,-10,-9,-8,21,22,23,24,25,26,27,28,-7,-28,-27,-26,-25,-24,-23,-22,-21,29,30,31,32,33,34,-20,-34,-33,-32,-31,-30,-29	12	23S Ribosomal RNA	23S Ribosomal RNA	23S Ribosomal RNA	haloarcula marismortui	haloarcula marismortui	haloarcula marismortui	N3-N2(amino)[3.25]	N6(amino)-O2'(hydroxyl)[3.08]_N1-O2'(hydroxyl)[2.59]	(1,1)	3	5	2	2	0	0	0	0	0	cSS		Multi Loop	Multi Loop
4v9f.cif1	intra	0	316	0.A.1691.	0.G.1430.	0.C.1436.	WC	19-XIX	cWW	cW-W	X	A|G-C	HC	S	S	LR	LR	SM	GACACAG	ACUGCUG	GAUCAGC				23S Ribosomal RNA	23S Ribosomal RNA	23S Ribosomal RNA	haloarcula marismortui	haloarcula marismortui	haloarcula marismortui	N6(amino)-N3[3.13]		(1,1)	3	6	2	2	0	0	0	0	0	cWS
4v9f.cif1	intra	0	317	0.A.1811.	0.G.2731.	0.C.2751.	WC	19-XIX	cWW	cW-W	X	A|G-C	JC	S	S	LR	LR	SM	CGCAGUG	CCGGUUG	GUGCCGG	abAcdeDfgFEChBHiGI	1,2,3,4,5,6,7,-6,-5,-4,-3,-2,-1,8,9,10,11,12,13,14,-13,15,16,17,18,19,20,-19,-18,-17,-16,-15,-14,-12,-11,-10,-9,-8,21,22,23,24,25,26,27,28,-7,-28,-27,-26,-25,-24,-23,-22,-21,29,30,31,32,33,34,-20,-34,-33,-32,-31,-30,-29	33	23S Ribosomal RNA	23S Ribosomal RNA	23S Ribosomal RNA	haloarcula marismortui	haloarcula marismortui	haloarcula marismortui	N6(amino)-O2'(hydroxyl)[3.13]_N6(amino)-N3[3.33]_N1-N2(amino)[2.87]		(1,1)	3	12	5	5	0	0	0	0	0	tWS
4v9f.cif1	intra	0	318	0.A.1857.	0.U.2246.	0.A.2255.	WC	20-XX	cWW	cW-W	X	A|U-A	IC	S	S	LR	LR	SM	CGCAAAU	CACUCCG	AGGAGGA				23S Ribosomal RNA	23S Ribosomal RNA	23S Ribosomal RNA	haloarcula marismortui	haloarcula marismortui	haloarcula marismortui	N6(amino)-O2(carbonyl)[3.33]_N1-O2'(hydroxyl)[2.62]		(1,1)	3	5	4	4	1	0	0	0	1	cWS
4v9f.cif1	intra	133	319	0.A.1858.	0.C.1854.	0.G.1877.	WC	19-XIX	cWW	cW-W	II	A|C-G	IC	S	S	LC	LC	SM	GCAAAUC	GACCGCA	UACGGUC				23S Ribosomal RNA	23S Ribosomal RNA	23S Ribosomal RNA	haloarcula marismortui	haloarcula marismortui	haloarcula marismortui	O2'(hydroxyl)-O3'[3.09]_O2'(hydroxyl)-O2'(hydroxyl)[2.72]_N3-O2'(hydroxyl)[2.61]		(2,2)	3	5	7	7	1	0	0	0	1	cSS	tW.
4v9f.cif1	intra	133	319	0.A.1859.	0.C.1853.	0.G.1878.	WC	19-XIX	cWW	cW-W	I	A|C-G	IC	S	S	LC	LC	SM	CAAAUCC	UGACCGC	ACGGUCA				23S Ribosomal RNA	23S Ribosomal RNA	23S Ribosomal RNA	haloarcula marismortui	haloarcula marismortui	haloarcula marismortui	O2'(hydroxyl)-O2'(hydroxyl)[2.68]_O2'(hydroxyl)-O2(carbonyl)[3.16]	N3-N2(amino)[3.20]	(2,2)	3	5	7	7	0	0	0	0	0		tSS	Interior Loop	Stem
4v9f.cif1	intra	125	304	0.A.1865.	0.G.1468.	0.C.1474.	WC	19-XIX	cWW	cW-W	II	A|G-C	HC	S	S	LR	LR	SM	CGCAAGG	ACCGCAA	ACUCGAC				23S Ribosomal RNA	23S Ribosomal RNA	23S Ribosomal RNA	haloarcula marismortui	haloarcula marismortui	haloarcula marismortui	O2'(hydroxyl)-O3'[3.07]_O2'(hydroxyl)-O2'(hydroxyl)[2.80]_N3-O2'(hydroxyl)[2.61]		(3,2)	4	4	2	2	1	0	0	0	1
4v9f.cif1	intra	125	304	0.A.1866.	0.C.1467.	0.G.1475.	WC	19-XIX	cWW	cW-W	I	A|C-G	HC	S	S	LR	LR	SM	GCAAGGA	CACCGCA	CUCGACU				23S Ribosomal RNA	23S Ribosomal RNA	23S Ribosomal RNA	haloarcula marismortui	haloarcula marismortui	haloarcula marismortui	O2'(hydroxyl)-O2'(hydroxyl)[2.69]	N1-O2'(hydroxyl)[2.65]_N3-N2(amino)[2.84]	(3,2)	4	4	2	2	1	0	0	0	1		tSS	Hairpin	Stem
4v9f.cif1	intra	134	320	0.A.1909.	0.U.2127.	0.A.2266.	WC	20-XX	cWW	cW-W	II	A|U-A	IC	S	S	LR	LR	SM	CUGAACA	GGCUGUC	GAUAGCC				23S Ribosomal RNA	23S Ribosomal RNA	23S Ribosomal RNA	haloarcula marismortui	haloarcula marismortui	haloarcula marismortui		O2'(hydroxyl)-O2'(hydroxyl)[2.69]_N3-O2'(hydroxyl)[2.88]	(4,3)	4	5	8	8	0	1	0	0	1
4v9f.cif1	intra	134	320	0.A.1910.	0.G.2128.	0.U.2265.	WB	28-XXVIII	cWW	cW-W	I	A|G-U	IC	S	S	LR	LR	SM	UGAACAC	GCUGUCG	CGAUAGC				23S Ribosomal RNA	23S Ribosomal RNA	23S Ribosomal RNA	haloarcula marismortui	haloarcula marismortui	haloarcula marismortui	N1-O2'(hydroxyl)[2.74]_N3-N2(amino)[3.00]		(4,3)	4	5	8	8	0	1	0	0	1	tSS
4v9f.cif1	intra	135	321	0.A.1921.	0.C.418.	0.G.2449.	WC	19-XIX	cWW	cW-W	X	A|C-G	HC	S	S	LR	LR	SM	UACAAGA	AGGCAUC	GAUGCGG	abAcdeDfgFEChBHiGI	1,2,3,4,5,6,7,-6,-5,-4,-3,-2,-1,8,9,10,11,12,13,14,-13,15,16,17,18,19,20,-19,-18,-17,-16,-15,-14,-12,-11,-10,-9,-8,21,22,23,24,25,26,27,28,-7,-28,-27,-26,-25,-24,-23,-22,-21,29,30,31,32,33,34,-20,-34,-33,-32,-31,-30,-29	7	23S Ribosomal RNA	23S Ribosomal RNA	23S Ribosomal RNA	haloarcula marismortui	haloarcula marismortui	haloarcula marismortui		N6(amino)-O2'(hydroxyl)[2.94]_N6(amino)-N3[3.24]_N1-N2(amino)[3.20]	(2,1)	3	6	6	6	0	0	0	0	0		tWS
4v9f.cif1	intra	135	321	0.A.1922.	0.C.418.	0.G.2449.	WC	19-XIX	cWW	cW-W	X	A|C-G	HC	S	S	LR	LR	SM	ACAAGAG	AGGCAUC	GAUGCGG	abAcdeDfgFEChBHiGI	1,2,3,4,5,6,7,-6,-5,-4,-3,-2,-1,8,9,10,11,12,13,14,-13,15,16,17,18,19,20,-19,-18,-17,-16,-15,-14,-12,-11,-10,-9,-8,21,22,23,24,25,26,27,28,-7,-28,-27,-26,-25,-24,-23,-22,-21,29,30,31,32,33,34,-20,-34,-33,-32,-31,-30,-29	7	23S Ribosomal RNA	23S Ribosomal RNA	23S Ribosomal RNA	haloarcula marismortui	haloarcula marismortui	haloarcula marismortui		N1-O2'(hydroxyl)[2.74]	(2,1)	3	6	6	6	0	0	0	0	0
4v9f.cif1	intra	134	320	0.A.1930.	0.U.2127.	0.A.2266.	WC	20-XX	cWW	cW-W	II	A|U-A	IC	S	S	LR	LR	SM	ACGAAGG	GGCUGUC	GAUAGCC				23S Ribosomal RNA	23S Ribosomal RNA	23S Ribosomal RNA	haloarcula marismortui	haloarcula marismortui	haloarcula marismortui	O2'(hydroxyl)-O3'[3.13]_O2'(hydroxyl)-O2'(hydroxyl)[2.72]_N3-O2'(hydroxyl)[2.79]		(4,3)	4	5	8	8	0	0	0	0	0
4v9f.cif1	intra	134	320	0.A.1931.	0.C.2126.	0.G.2267.	WC	19-XIX	cWW	cW-W	I	A|C-G	IC	S	S	LR	LR	SM	CGAAGGA	AGGCUGU	AUAGCCG				23S Ribosomal RNA	23S Ribosomal RNA	23S Ribosomal RNA	haloarcula marismortui	haloarcula marismortui	haloarcula marismortui	O2'(hydroxyl)-O2'(hydroxyl)[3.16]	N1-O2'(hydroxyl)[2.84]_N3-N2(amino)[3.19]	(4,3)	4	5	8	8	0	0	0	0	0		tSS	Interior Loop	Stem
4v9f.cif1	intra	136	322	0.A.1941.	0.G.1849.	0.C.1882.	WC	19-XIX	cWW	cW-W	I	A|G-C	BC	S	S	LR	LR	SM	GUCAACG	UAGGUGA	UCACUGA				23S Ribosomal RNA	23S Ribosomal RNA	23S Ribosomal RNA	haloarcula marismortui	haloarcula marismortui	haloarcula marismortui	N1-O2'(hydroxyl)[2.62]_N3-N2(amino)[3.54]		(3,2)	6	2	7	7	0	0	0	0	0	tWS
4v9f.cif1	intra	137	323	0.A.1968.	0.C.1893.	0.G.1944.	WC	19-XIX	cWW	cW-W	II	A|C-G	JC	S	S	LC	LC	SM	CUUAAGG	UGCCCAG	AACGGCG				23S Ribosomal RNA	23S Ribosomal RNA	23S Ribosomal RNA	haloarcula marismortui	haloarcula marismortui	haloarcula marismortui	O2'(hydroxyl)-O3'[2.98]_O2'(hydroxyl)-O2'(hydroxyl)[2.71]_N3-O2'(hydroxyl)[2.53]		(2,2)	3	20	3	3	0	0	0	0	0
4v9f.cif1	intra	137	323	0.A.1969.	0.C.1892.	0.G.1945.	WC	19-XIX	cWW	cW-W	I	A|C-G	JC	S	S	LC	LC	SM	UUAAGGU	CUGCCCA	ACGGCGG				23S Ribosomal RNA	23S Ribosomal RNA	23S Ribosomal RNA	haloarcula marismortui	haloarcula marismortui	haloarcula marismortui	O2'(hydroxyl)-O2'(hydroxyl)[2.97]	N1-O2'(hydroxyl)[2.66]_N3-N2(amino)[3.05]	(2,2)	3	20	3	3	0	0	0	0	0		tSS
4v9f.cif1	intra	0	324	0.A.1978.	0.C.1975.	0.G.2005.	WC	19-XIX	cWW	cW-W	X	A|C-G	JC	JC	JC	SM	SM	SM	CGUAGUA	UAGCGUA	CUUGCAU				23S Ribosomal RNA	23S Ribosomal RNA	23S Ribosomal RNA	haloarcula marismortui	haloarcula marismortui	haloarcula marismortui		N1-N2(amino)[3.01]	(1,1)	2	20	20	10	0	1	0	0	1		tWS
4v9f.cif1	intra	0	325	0.A.1994.	0.G.2584.	0.C.2594.	WC	19-XIX	cWW	cW-W	I	A|G-C	HC	S	S	LR	LR	SM	AUCAGUA	UGAGGUM	CGCCUAU				23S Ribosomal RNA	23S Ribosomal RNA	23S Ribosomal RNA	haloarcula marismortui	haloarcula marismortui	haloarcula marismortui	N1-O2'(hydroxyl)[2.62]_N3-N2(amino)[3.05]	O3'-O2'(hydroxyl)[3.26]_O2'(hydroxyl)-O2'(hydroxyl)[2.70]_O2'(hydroxyl)-O2(carbonyl)[2.69]	(1,1)	3	7	3	3	0	1	0	0	1	tSS		Hairpin	Stem
4v9f.cif1	intra	0	326	0.A.2007.	0.G.2627.	0.C.2636.	WC	19-XIX	cWW	cW-W	X	A|G-C	JC	S	S	LR	LR	SM	UGCAUGA	ACCGUCG	AGACAGG				23S Ribosomal RNA	23S Ribosomal RNA	23S Ribosomal RNA	haloarcula marismortui	haloarcula marismortui	haloarcula marismortui	N1-N2(amino)[3.43]_N3-O2'(hydroxyl)[2.59]		(1,1)	3	10	3	3	0	0	0	0	0	cWS
4v9f.cif1	intra	136	322	0.A.2010.	0.C.1889.	0.G.2013.	WC	19-XIX	cWW	cW-W	I	A|C-G	JC	S	S	LC	LC	SM	AUGAAUG	AUCCUGC	AAUGGAU				23S Ribosomal RNA	23S Ribosomal RNA	23S Ribosomal RNA	haloarcula marismortui	haloarcula marismortui	haloarcula marismortui	N1-O2'(hydroxyl)[2.70]	O3'-O2'(hydroxyl)[3.34]_O2'(hydroxyl)-O2'(hydroxyl)[2.84]_O2'(hydroxyl)-N3[2.62]_N3-N2(amino)[3.06]	(3,2)	6	10	3	3	0	0	0	0	0		cSS
4v9f.cif1	intra	136	322	0.A.2011.	0.G.1849.	0.C.1882.	WC	19-XIX	cWW	cW-W	I	A|G-C	JC	S	S	LR	LR	SM	UGAAUGG	UAGGUGA	UCACUGA				23S Ribosomal RNA	23S Ribosomal RNA	23S Ribosomal RNA	haloarcula marismortui	haloarcula marismortui	haloarcula marismortui	O2'(hydroxyl)-N2(amino)[3.02]		(3,2)	6	10	7	7	0	0	0	0	0
4v9f.cif1	intra	0	327	0.A.2022.	0.G.830.	0.C.851.	WC	19-XIX	cWW	cW-W	X	A|G-C	BC	S	S	LR	LR	SM	ACCAGAG	AGAGUUG	CCUCUCG				23S Ribosomal RNA	23S Ribosomal RNA	23S Ribosomal RNA	haloarcula marismortui	haloarcula marismortui	haloarcula marismortui	N1-N2(amino)[2.87]	N3-O2'(hydroxyl)[2.65]	(1,1)	3	1	3	3	0	1	0	0	1	tW.	cWS
4v9f.cif1	intra	0	328	0.A.2291.	0.C.2281.	0.G.2289.	WC	19-XIX	cWW	cW-W	X	A|C-G	JIJP	S	S	LC	LC	SM	GGUACGC	UGACUGG	GCGGUAC				23S Ribosomal RNA	23S Ribosomal RNA	23S Ribosomal RNA	haloarcula marismortui	haloarcula marismortui	haloarcula marismortui		N7-N2(amino)[2.90]_N6(amino)-O2'(hydroxyl)[2.72]_N6(amino)-N3[2.90]	(1,1)	3	2	2	2	0	0	0	1	1		tHS
4v9f.cif1	intra	0	329	0.A.2307.	0.G.1052.	0.U.1062.	WB	28-XXVIII	cWW	cW-W	II	A|G-U	HC	S	S	LR	LR	SM	GAUAUCG	CGCGGGG	GCCUGUG				23S Ribosomal RNA	23S Ribosomal RNA	23S Ribosomal RNA	haloarcula marismortui	haloarcula marismortui	haloarcula marismortui	N1-N2(amino)[3.00]	O2'(hydroxyl)-O3'[2.92]_O2'(hydroxyl)-O2'(hydroxyl)[2.90]_N3-O2'(hydroxyl)[2.54]	(1,1)	3	11	10	10	0	0	0	0	0	tWW
4v9f.cif1	intra	138	330	0.A.2361.	0.G.2295.	0.C.2313.	WC	19-XIX	cWW	cW-W	I	A|G-C	HP	S	S	LR	LR	SM	UGCAAGA	CGCGCUC	GAGCGCG				23S Ribosomal RNA	23S Ribosomal RNA	23S Ribosomal RNA	haloarcula marismortui	haloarcula marismortui	haloarcula marismortui	N1-O2'(hydroxyl)[2.85]_N3-N2(amino)[2.98]	O2'(hydroxyl)-O2'(hydroxyl)[2.97]	(2,2)	4	3	6	6	1	0	0	0	1	t.S
4v9f.cif1	intra	0	331	0.A.2370.	0.U.2358.	0.G.2365.	WB	28-XXVIII	cWW	cW-W	I	A|U-G	JCJP	S	S	LC	LC	SM	AAAAGAU	GAGUGCA	AGAGCAA	abAB	1,2,3,4,-3,-2,-1,-4	3	23S Ribosomal RNA	23S Ribosomal RNA	23S Ribosomal RNA	haloarcula marismortui	haloarcula marismortui	haloarcula marismortui		N1-O2'(hydroxyl)[2.49]_N3-N2(amino)[3.00]	(1,1)	3	4	2	2	0	0	0	0	0		tSS
4v9f.cif1	intra	139	332	0.A.2394.	0.C.915.	0.G.928.	WC	19-XIX	cWW	cW-W	X	A|C-G	HC	S	S	LR	LR	SM	CCCAACG	AAACAUG	CAUGACC				23S Ribosomal RNA	23S Ribosomal RNA	23S Ribosomal RNA	haloarcula marismortui	haloarcula marismortui	haloarcula marismortui		N1-N2(amino)[2.85]_N3-O2'(hydroxyl)[2.80]	(2,2)	3	9	5	5	0	0	0	0	0		cWS
4v9f.cif1	intra	139	332	0.A.2395.	0.A.916.	0.U.927.	WC	20-XX	cWW	cW-W	X	A|A-U	HC	S	S	LR	LR	SM	CCAACGA	AACAUGU	GCAUGAC				23S Ribosomal RNA	23S Ribosomal RNA	23S Ribosomal RNA	haloarcula marismortui	haloarcula marismortui	haloarcula marismortui	N6(amino)-N3[3.38]	N3-O2'(hydroxyl)[2.66]	(2,2)	3	9	5	5	0	0	0	0	0
4v9f.cif1	intra	138	330	0.A.2425.	0.C.2294.	0.G.2314.	WC	19-XIX	cWW	cW-W	I	A|C-G	JIJP	S	S	LC	LC	SM	UCUAGCG	ACGCGCU	AGCGCGC				23S Ribosomal RNA	23S Ribosomal RNA	23S Ribosomal RNA	haloarcula marismortui	haloarcula marismortui	haloarcula marismortui	O2'(hydroxyl)-O2'(hydroxyl)[2.58]	N1-O2'(hydroxyl)[2.58]_N3-N2(amino)[3.24]	(2,2)	4	7	6	6	0	0	0	0	0		tSS
4v9f.cif1	intra	103	259	0.A.2469.	0.A.2118.	0.U.2276.	WC	20-XX	cWW	cW-W	I	A|A-U	JI	S	S	LC	LC	SM	GAAAAGC	UUUACUG	CAGUUUG				23S Ribosomal RNA	23S Ribosomal RNA	23S Ribosomal RNA	haloarcula marismortui	haloarcula marismortui	haloarcula marismortui		N1-O2'(hydroxyl)[3.01]	(2,2)	4	10	5	5	1	0	0	0	1		tWS
4v9f.cif1	intra	0	333	0.A.2566.	0.C.2695.	0.G.2700.	WC	19-XIX	cWW	cW-W	X	A|C-G	HC	HC	HC	LR	LR	SM	UGCAGAA	GUACGAG	AGAGGAA				23S Ribosomal RNA	23S Ribosomal RNA	23S Ribosomal RNA	haloarcula marismortui	haloarcula marismortui	haloarcula marismortui	O2'(hydroxyl)-O2'(hydroxyl)[2.83]_N3-O2'(hydroxyl)[2.73]		(1,1)	2	6	15	15	0	0	0	0	0	cWS
4v9f.cif1	intra	140	334	0.A.2599.	0.C.2556.	0.G.2579.	WC	19-XIX	cWW	cW-W	II	A|C-G	JC	S	S	LC	LC	SM	AUUAAAG	AUCCUGC	AAGGGUG				23S Ribosomal RNA	23S Ribosomal RNA	23S Ribosomal RNA	haloarcula marismortui	haloarcula marismortui	haloarcula marismortui	O2'(hydroxyl)-O3'[3.23]_O2'(hydroxyl)-O2'(hydroxyl)[2.88]_N3-O2'(hydroxyl)[2.73]		(2,2)	3	6	3	3	0	1	0	0	1
4v9f.cif1	intra	140	334	0.A.2600.	0.C.2555.	0.G.2580.	WC	19-XIX	cWW	cW-W	I	A|C-G	JC	S	S	LC	LC	SM	UUAAAGG	CAUCCUG	AGGGUGA				23S Ribosomal RNA	23S Ribosomal RNA	23S Ribosomal RNA	haloarcula marismortui	haloarcula marismortui	haloarcula marismortui	O2'(hydroxyl)-O2'(hydroxyl)[2.58]	N1-O2'(hydroxyl)[2.66]_N3-N2(amino)[3.12]	(2,2)	3	6	3	3	0	0	0	0	0		tSS
4v9f.cif1	intra	0	335	0.A.2633.	0.C.2114.	0.G.2471.	WC	19-XIX	cWW	cW-W	I	A|C-G	HC	S	S	LR	LR	SM	GUGAGAC	GAGCUUU	AAAGCUA	abAcdeDfgFEChBHiGI	1,2,3,4,5,6,7,-6,-5,-4,-3,-2,-1,8,9,10,11,12,13,14,-13,15,16,17,18,19,20,-19,-18,-17,-16,-15,-14,-12,-11,-10,-9,-8,21,22,23,24,25,26,27,28,-7,-28,-27,-26,-25,-24,-23,-22,-21,29,30,31,32,33,34,-20,-34,-33,-32,-31,-30,-29	26	23S Ribosomal RNA	23S Ribosomal RNA	23S Ribosomal RNA	haloarcula marismortui	haloarcula marismortui	haloarcula marismortui	O2'(hydroxyl)-O2'(hydroxyl)[2.75]	N1-O2'(hydroxyl)[2.58]_N3-N2(amino)[3.06]	(1,1)	3	4	4	4	1	0	0	0	1		tWS	Hairpin	Stem
4v9f.cif1	intra	141	336	0.A.2680.	0.C.2682.	0.G.2712.	WC	19-XIX	cWW	cW-W	II	A|C-G	JCJP	S	S	LC	LC	SM	AAGAACG	GAACGAC	GUUGGUG				23S Ribosomal RNA	23S Ribosomal RNA	23S Ribosomal RNA	haloarcula marismortui	haloarcula marismortui	haloarcula marismortui	N3-O2'(hydroxyl)[2.76]	N1-N2(amino)[2.96]	(2,2)	5	2	8	8	0	0	0	0	0		tW.
4v9f.cif1	intra	141	336	0.A.2681.	0.G.2713.	0.C.2767.	WC	19-XIX	cWW	cW-W	I	A|G-C	JCJP	S	S	LC	LC	SM	AGAACGA	UUGGUGG	CCACACG	abAcdeDfgFEChBHiGI	1,2,3,4,5,6,7,-6,-5,-4,-3,-2,-1,8,9,10,11,12,13,14,-13,15,16,17,18,19,20,-19,-18,-17,-16,-15,-14,-12,-11,-10,-9,-8,21,22,23,24,25,26,27,28,-7,-28,-27,-26,-25,-24,-23,-22,-21,29,30,31,32,33,34,-20,-34,-33,-32,-31,-30,-29	31	23S Ribosomal RNA	23S Ribosomal RNA	23S Ribosomal RNA	haloarcula marismortui	haloarcula marismortui	haloarcula marismortui	N1-O2'(hydroxyl)[2.58]_N3-N2(amino)[3.43]	O3'-O2'(hydroxyl)[3.38]	(2,2)	5	2	5	5	0	0	0	0	0	t.S
4v9f.cif1	intra	142	337	0.A.2776.	0.C.2559.	0.G.2574.	WC	19-XIX	cWW	cW-W	I	A|C-G	IC	S	S	LR	LR	SM	GUAAGAG	CUGCCCG	CGGGCAA				23S Ribosomal RNA	23S Ribosomal RNA	23S Ribosomal RNA	haloarcula marismortui	haloarcula marismortui	haloarcula marismortui	N1-O2'(hydroxyl)[2.73]	O2'(hydroxyl)-O2'(hydroxyl)[2.67]_O2'(hydroxyl)-N3[3.25]_N3-N2(amino)[2.78]	(2,2)	4	4	6	6	1	0	0	0	1		cSS	Interior Loop	Stem
4v9f.cif1	intra	142	337	0.A.2799.	0.G.2558.	0.C.2575.	WC	19-XIX	cWW	cW-W	I	A|G-C	IC	S	S	LR	LR	SM	UCGAAAC	CCUGCCC	GGGCAAG				23S Ribosomal RNA	23S Ribosomal RNA	23S Ribosomal RNA	haloarcula marismortui	haloarcula marismortui	haloarcula marismortui	O3'-O2'(hydroxyl)[2.87]_O2'(hydroxyl)-O2'(hydroxyl)[2.77]_O2'(hydroxyl)-N3[2.64]_N3-N2(amino)[2.90]		(2,2)	4	4	6	6	1	0	0	0	1	cSS
4v9f.cif1	intra	0	338	0.A.2827.	0.G.2667.	0.C.2822.	WC	19-XIX	cWW	cW-W	I	A|G-C	II	S	S	LC	LC	SM	CCGAGGU	AAUGGUG	CACCGCC	abAcdeDfgFEChBHiGI	1,2,3,4,5,6,7,-6,-5,-4,-3,-2,-1,8,9,10,11,12,13,14,-13,15,16,17,18,19,20,-19,-18,-17,-16,-15,-14,-12,-11,-10,-9,-8,21,22,23,24,25,26,27,28,-7,-28,-27,-26,-25,-24,-23,-22,-21,29,30,31,32,33,34,-20,-34,-33,-32,-31,-30,-29	29	23S Ribosomal RNA	23S Ribosomal RNA	23S Ribosomal RNA	haloarcula marismortui	haloarcula marismortui	haloarcula marismortui	N1-O2'(hydroxyl)[2.56]_N3-N2(amino)[2.98]	O2'(hydroxyl)-O2'(hydroxyl)[2.71]_O2'(hydroxyl)-O2(carbonyl)[3.27]	(1,1)	3	5	6	6	0	0	0	0	0	tSS
4v9f.cif1	intra	143	339	0.A.2840.	0.C.2088.	0.G.2656.	WC	19-XIX	cWW	cW-W	X	A|C-G	HC	S	S	LR	LR	SM	UACAAGA	ACCCAGG	ACUGGGU	abAcdeDfgFEChBHiGI	1,2,3,4,5,6,7,-6,-5,-4,-3,-2,-1,8,9,10,11,12,13,14,-13,15,16,17,18,19,20,-19,-18,-17,-16,-15,-14,-12,-11,-10,-9,-8,21,22,23,24,25,26,27,28,-7,-28,-27,-26,-25,-24,-23,-22,-21,29,30,31,32,33,34,-20,-34,-33,-32,-31,-30,-29	21	23S Ribosomal RNA	23S Ribosomal RNA	23S Ribosomal RNA	haloarcula marismortui	haloarcula marismortui	haloarcula marismortui	N6(amino)-O2(carbonyl)[3.02]_N1-O2'(hydroxyl)[2.66]		(2,2)	3	7	7	7	0	0	0	0	0	cWS
4v9f.cif1	intra	143	339	0.A.2841.	0.C.2087.	0.G.2657.	WC	19-XIX	cWW	cW-W	X	A|C-G	HC	S	S	LR	LR	SM	ACAAGAC	CACCCAG	CUGGGUG	abAcdeDfgFEChBHiGI	1,2,3,4,5,6,7,-6,-5,-4,-3,-2,-1,8,9,10,11,12,13,14,-13,15,16,17,18,19,20,-19,-18,-17,-16,-15,-14,-12,-11,-10,-9,-8,21,22,23,24,25,26,27,28,-7,-28,-27,-26,-25,-24,-23,-22,-21,29,30,31,32,33,34,-20,-34,-33,-32,-31,-30,-29	21	23S Ribosomal RNA	23S Ribosomal RNA	23S Ribosomal RNA	haloarcula marismortui	haloarcula marismortui	haloarcula marismortui		N6(amino)-O2'(hydroxyl)[3.07]_N6(amino)-N3[2.93]_N1-N2(amino)[3.13]	(2,2)	3	7	7	7	0	0	0	0	0		tWS
4v9f.cif1	intra	144	340	0.A.2875.	0.C.1787.	0.G.1805.	WC	19-XIX	cWW	cW-W	I	A|C-G	HC	S	S	LR	LR	SM	UCGAGGU	UGCCUGC	GCAGGUC				23S Ribosomal RNA	23S Ribosomal RNA	23S Ribosomal RNA	haloarcula marismortui	haloarcula marismortui	haloarcula marismortui	N1-O2'(hydroxyl)[2.72]	O2'(hydroxyl)-O2'(hydroxyl)[2.44]_N3-N2(amino)[3.47]	(2,2)	3	10	9	9	0	0	0	0	0	tWS	cSS	Hairpin	Stem
4v9f.cif1	intra	144	340	0.A.2883.	0.C.1786.	0.G.1806.	WC	19-XIX	cWW	cW-W	I	A|C-G	HC	S	S	LR	LR	SM	ACGAGAC	AUGCCUG	CAGGUCG				23S Ribosomal RNA	23S Ribosomal RNA	23S Ribosomal RNA	haloarcula marismortui	haloarcula marismortui	haloarcula marismortui	O2'(hydroxyl)-O2'(hydroxyl)[2.98]	N1-O2'(hydroxyl)[3.05]_N3-N2(amino)[3.29]	(2,2)	3	10	9	9	1	0	0	0	1		tSS	Hairpin	Stem
4v9f.cif1	intra	145	341	0.A.2906.	0.C.2833.	0.G.2847.	WC	19-XIX	cWW	cW-W	I	A|C-G	JC	S	S	LC	LC	SM	CUAACAG	UCCCGCG	CGCGGUC				23S Ribosomal RNA	23S Ribosomal RNA	23S Ribosomal RNA	haloarcula marismortui	haloarcula marismortui	haloarcula marismortui	O2'(hydroxyl)-O2'(hydroxyl)[2.73]_O2'(hydroxyl)-O2(carbonyl)[2.40]	N1-O2'(hydroxyl)[2.84]_N3-N2(amino)[3.02]	(2,2)	3	3	5	5	0	1	1	0	1		tSS	Multi Loop	Stem
4v9f.cif1	intra	145	341	0.A.2908.	0.C.2832.	0.G.2848.	WC	19-XIX	cWW	cW-W	X	A|C-G	JC	S	S	LC	LC	SM	AACAGAC	GUCCCGC	GCGGUCG				23S Ribosomal RNA	23S Ribosomal RNA	23S Ribosomal RNA	haloarcula marismortui	haloarcula marismortui	haloarcula marismortui	N6(amino)-O2(carbonyl)[2.58]_N1-O2'(hydroxyl)[2.89]		(2,2)	3	3	5	5	0	1	0	0	1	cWS
4v9f.cif1	intra	0	342	9.A.3.	9.G.21.	9.C.59.	WC	19-XIX	cWW	cW-W	I	A|G-C	HC	S	S	LR	LR	SM	NUUAGGC	UGGGGUU	AAGCCCA				5S Ribosomal RNA	5S Ribosomal RNA	5S Ribosomal RNA	haloarcula marismortui	haloarcula marismortui	haloarcula marismortui	N1-O2'(hydroxyl)[2.67]_N3-N2(amino)[3.19]		(1,1)	3	3	6	6	0	0	0	0	0	t.S
4v9f.cif1	intra	146	343	9.A.52.	9.C.30.	9.G.50.	WC	19-XIX	cWW	cW-W	X	A|C-G	BC	S	S	LC	LC	SM	GGAAGAU	CUCCCGU	ACGGAAG				5S Ribosomal RNA	5S Ribosomal RNA	5S Ribosomal RNA	haloarcula marismortui	haloarcula marismortui	haloarcula marismortui	N6(amino)-O2(carbonyl)[2.58]_N1-O2'(hydroxyl)[2.86]		(3,3)	6	2	4	4	1	0	0	0	1	cWS
4v9f.cif1	intra	146	343	9.A.56.	9.U.28.	9.A.54.	WC	20-XX	cWW	cW-W	X	A|U-A	IC	S	S	LC	LC	SM	GAUAAGC	GCCUCCC	AAGAUAA				5S Ribosomal RNA	5S Ribosomal RNA	5S Ribosomal RNA	haloarcula marismortui	haloarcula marismortui	haloarcula marismortui		N7-O2'(hydroxyl)[3.05]_N6(amino)-N3[2.95]	(3,3)	6	4	2	2	0	0	0	0	0		cHS
4v9f.cif1	intra	146	343	9.A.56.	9.C.29.	9.G.53.	WC	19-XIX	cWW	cW-W	X	A|C-G	IC	S	S	LC	LC	SM	GAUAAGC	CCUCCCG	GAAGAUA				5S Ribosomal RNA	5S Ribosomal RNA	5S Ribosomal RNA	haloarcula marismortui	haloarcula marismortui	haloarcula marismortui	N6(amino)-O2(carbonyl)[2.91]_N1-O2'(hydroxyl)[2.85]		(3,3)	6	4	2	2	0	0	0	0	0	cWS
4v9f.cif1	intra	146	343	9.A.57.	9.U.28.	9.A.54.	WC	20-XX	cWW	cW-W	X	A|U-A	IC	S	S	LC	LC	SM	AUAAGCC	GCCUCCC	AAGAUAA				5S Ribosomal RNA	5S Ribosomal RNA	5S Ribosomal RNA	haloarcula marismortui	haloarcula marismortui	haloarcula marismortui	N6(amino)-O2(carbonyl)[2.86]_N1-O2'(hydroxyl)[2.51]		(3,3)	6	4	2	2	0	0	0	0	0	cWS
4wfl.cif1	intra	0	344	A.A.43.	A.G.28.	A.C.46.	WC	19-XIX	cWW	cW-W	I	A|G-C	HP	S	S	LC	LC	SM	UGCAAUC	GCGGUGC	AAUCCGC	abAcBC	1,2,-1,3,-2,-3	2	RNA	RNA	RNA	bacillus subtilis	bacillus subtilis	bacillus subtilis	N1-O2'(hydroxyl)[2.70]_N3-N2(amino)[3.13]	O2'(hydroxyl)-O2'(hydroxyl)[2.48]_O2'(hydroxyl)-O2(carbonyl)[2.85]	(1,1)	3	3	5	5	1	0	0	0	1	t.S
4wfl.cif1	intra	0	345	A.A.53.	A.G.25.	A.C.49.	WC	19-XIX	cWW	cW-W	I	A|G-C	HP	S	S	LC	LC	SM	UCUAGCA	GUAGCGG	CCGCUCU	abAcBC	1,2,-1,3,-2,-3	2	RNA	RNA	RNA	bacillus subtilis	bacillus subtilis	bacillus subtilis	N1-O2'(hydroxyl)[2.61]_N3-N2(amino)[3.05]	O2'(hydroxyl)-O2'(hydroxyl)[2.91]_O2'(hydroxyl)-O2(carbonyl)[2.97]	(1,1)	3	3	5	5	0	1	0	0	1	tSS
4xnr.cif1	intra	0	346	X.A.23.	X.G.46.	X.C.53.	WC	19-XIX	cWW	cW-W	X	A|G-C	II	HP	HP	LR	LR	SM	UAUAAUC	GGAGUUU	CUACCAA				Vibrio Vulnificus Adenine Riboswitch	Vibrio Vulnificus Adenine Riboswitch	Vibrio Vulnificus Adenine Riboswitch	vibrio vulnificus	vibrio vulnificus	vibrio vulnificus	N6(amino)-O2'(hydroxyl)[3.32]_N6(amino)-N3[2.95]_N1-N2(amino)[2.96]		(1,1)	2	3	8	8	0	0	0	0	0	tWS
4xnr.cif1	intra	147	347	X.A.33.	X.G.37.	X.C.61.	WC	19-XIX	cWW	cW-W	X	A|G-C	HP	S	S	LC	LC	SM	AUGAUAU	UAUGGUU	AGCCUUA	abAcBC	1,2,-1,3,-2,-3	2	Vibrio Vulnificus Adenine Riboswitch	Vibrio Vulnificus Adenine Riboswitch	Vibrio Vulnificus Adenine Riboswitch	vibrio vulnificus	vibrio vulnificus	vibrio vulnificus	O2'(hydroxyl)-O2'(hydroxyl)[2.76]_N3-O2'(hydroxyl)[2.68]		(3,2)	4	6	2	2	0	0	0	0	0
4xnr.cif1	intra	147	347	X.A.65.	X.G.37.	X.C.61.	WC	19-XIX	cWW	cW-W	X	A|G-C	HP	S	S	LC	LC	SM	UUAAACU	UAUGGUU	AGCCUUA	abAcBC	1,2,-1,3,-2,-3	2	Vibrio Vulnificus Adenine Riboswitch	Vibrio Vulnificus Adenine Riboswitch	Vibrio Vulnificus Adenine Riboswitch	vibrio vulnificus	vibrio vulnificus	vibrio vulnificus		N6(amino)-O2(carbonyl)[2.98]_N1-O2'(hydroxyl)[2.72]	(3,2)	4	5	2	2	0	0	0	0	0		cWS
4xnr.cif1	intra	147	347	X.A.66.	X.G.38.	X.C.60.	WC	19-XIX	cWW	cW-W	X	A|G-C	HP	S	S	LC	LC	SM	UAAACUC	AUGGUUU	GAGCCUU	abAcBC	1,2,-1,3,-2,-3	2	Vibrio Vulnificus Adenine Riboswitch	Vibrio Vulnificus Adenine Riboswitch	Vibrio Vulnificus Adenine Riboswitch	vibrio vulnificus	vibrio vulnificus	vibrio vulnificus	N6(amino)-N3[3.35]_N1-N2(amino)[2.88]		(3,2)	4	5	2	2	0	0	0	0	0	tWS
4y1m.cif1	intra	0	348	B.A.11.	B.C.43.	B.G.65.	WC	19-XIX	cWW	cW-W	I	A|C-G	IC	S	S	LR	LR	SM	GGGAGUA	UGUCAAC	CGUGGCA				E. coli yybP-ykoY riboswitch	E. coli yybP-ykoY riboswitch	E. coli yybP-ykoY riboswitch	escherichia coli	escherichia coli	escherichia coli	O3'-O2'(hydroxyl)[3.26]	N6(amino)-O2'(hydroxyl)[3.30]_N1-O2'(hydroxyl)[2.47]_N3-N2(amino)[3.18]	(1,1)	3	6	10	10	1	1	0	0	1		tWS
4y4o.cif1	inter	148	349	1A.A.1934.	1a.5MC.1407.	1a.G.1494.	WC	19-XIX	cWW	cW-W	I	A|c-G	HC	IC	IC	LR	LR	SM	CGMAACM	MGUMACG	GAAGUCG				23S Ribosomal RNA	16S Ribosomal RNA	16S Ribosomal RNA	thermus thermophilus	thermus thermophilus	thermus thermophilus	N1-O2'(hydroxyl)[2.92]	O3'-O2'(hydroxyl)[3.17]_O2'(hydroxyl)-O2'(hydroxyl)[2.58]_N3-N2(amino)[3.24]	(2,2)	3	9	3	4	0	0	0	0	0		cSS
4y4o.cif1	inter	148	349	1A.A.1935.	1a.A.1408.	1a.A.1492.	NA	n/a	cWW	cW-W	X	A|A-A	HC	IC	IC	LR	LR	SM	GMAACMA	GUMACGC	GCGAAGU				23S Ribosomal RNA	16S Ribosomal RNA	16S Ribosomal RNA	thermus thermophilus	thermus thermophilus	thermus thermophilus		N6(amino)-N3[2.90]	(2,2)	3	9	3	4	0	0	0	0	0		cWS
4y4o.cif1	intra	149	350	1a.A.51.	1a.G.113.	1a.C.314.	WC	19-XIX	cWW	cW-W	X	A|G-C	JC	S	S	LR	LR	SM	CUAAGAC	CGGGUGA	CCACAGG				16S Ribosomal RNA	16S Ribosomal RNA	16S Ribosomal RNA	thermus thermophilus	thermus thermophilus	thermus thermophilus		N6(amino)-O2(carbonyl)[3.22]_N1-O2'(hydroxyl)[2.71]	(3,2)	5	5	3	3	0	0	0	0	0		cWS
4y4o.cif1	intra	149	350	1a.A.51.	1a.U.114.	1a.A.313.	WC	20-XX	cWW	cW-W	X	A|U-A	JC	S	S	LR	LR	SM	CUAAGAC	GGGUGAG	GCCACAG				16S Ribosomal RNA	16S Ribosomal RNA	16S Ribosomal RNA	thermus thermophilus	thermus thermophilus	thermus thermophilus	N7-O2'(hydroxyl)[2.63]_N6(amino)-O2(carbonyl)[2.78]		(3,2)	5	5	3	3	0	0	0	0	0	cHS
4y4o.cif1	intra	149	350	1a.A.116.	1a.U.114.	1a.A.313.	WC	20-XX	cWW	cW-W	X	A|U-A	JC	S	S	LC	LC	SM	GUGAGUA	GGGUGAG	GCCACAG				16S Ribosomal RNA	16S Ribosomal RNA	16S Ribosomal RNA	thermus thermophilus	thermus thermophilus	thermus thermophilus		N6(amino)-N3[2.67]_N1-O2'(hydroxyl)[2.76]	(3,2)	5	6	3	3	1	1	0	0	1		tWS
4y4o.cif1	intra	150	351	1a.A.130.	1a.G.128.	1a.C.233.	WC	19-XIX	cWW	cW-W	X	A|G-C	BC	S	S	LC	LC	SM	GUGACCU	UGGGUGA	GGGCCCG				16S Ribosomal RNA	16S Ribosomal RNA	16S Ribosomal RNA	thermus thermophilus	thermus thermophilus	thermus thermophilus		N6(amino)-O2(carbonyl)[3.14]_N1-O2'(hydroxyl)[2.77]	(3,3)	6	2	8	8	1	0	1	0	1		cWS
4y4o.cif1	intra	151	352	1a.A.151.	1a.C.67.	1a.G.102.	WC	19-XIX	cWW	cW-W	II	A|C-G	IC	S	S	LR	LR	SM	GACAACC	GUGCGGG	UCAGCGG				16S Ribosomal RNA	16S Ribosomal RNA	16S Ribosomal RNA	thermus thermophilus	thermus thermophilus	thermus thermophilus		O2'(hydroxyl)-O3'[3.51]_O2'(hydroxyl)-O2'(hydroxyl)[2.96]_N3-O2'(hydroxyl)[2.58]	(3,2)	4	4	2	2	0	0	0	0	0		cWS
4y4o.cif1	intra	152	353	1a.A.160.	1a.C.342.	1a.G.347.	WC	19-XIX	cWW	cW-W	X	A|C-G	HC	S	S	LR	LR	SM	GGGAAAC	CUCCUAC	ACGGGAG				16S Ribosomal RNA	16S Ribosomal RNA	16S Ribosomal RNA	thermus thermophilus	thermus thermophilus	thermus thermophilus		N6(amino)-O2'(hydroxyl)[3.00]_N6(amino)-N3[3.25]_N1-N2(amino)[2.94]	(2,1)	3	4	4	4	1	0	0	0	1		tWS
4y4o.cif1	intra	152	353	1a.A.161.	1a.C.342.	1a.G.347.	WC	19-XIX	cWW	cW-W	X	A|C-G	HC	S	S	LR	LR	SM	GGAAACU	CUCCUAC	ACGGGAG				16S Ribosomal RNA	16S Ribosomal RNA	16S Ribosomal RNA	thermus thermophilus	thermus thermophilus	thermus thermophilus		N1-O2'(hydroxyl)[2.62]	(2,1)	3	4	4	4	1	0	0	0	1
4y4o.cif1	intra	151	352	1a.A.171.	1a.C.67.	1a.G.102.	WC	19-XIX	cWW	cW-W	II	A|C-G	IC	S	S	LR	LR	SM	GCUAAUC	GUGCGGG	UCAGCGG				16S Ribosomal RNA	16S Ribosomal RNA	16S Ribosomal RNA	thermus thermophilus	thermus thermophilus	thermus thermophilus	O2'(hydroxyl)-O2'(hydroxyl)[2.70]_N3-O2'(hydroxyl)[3.02]		(3,2)	4	5	2	2	0	0	0	0	0
4y4o.cif1	intra	151	352	1a.A.172.	1a.G.66.	1a.C.103.	WC	19-XIX	cWW	cW-W	I	A|G-C	IC	S	S	LR	LR	SM	CUAAUCC	CGUGCGG	CAGCGGC				16S Ribosomal RNA	16S Ribosomal RNA	16S Ribosomal RNA	thermus thermophilus	thermus thermophilus	thermus thermophilus	O2'(hydroxyl)-O2'(hydroxyl)[2.86]_N3-N2(amino)[3.06]	N1-O2'(hydroxyl)[2.56]	(3,2)	4	5	2	2	0	0	0	0	0	cSS
4y4o.cif1	intra	153	354	1a.A.195.	1a.A.141.	1a.U.222.	WC	20-XX	cWW	cW-W	II	A|A-U	JC	S	S	LC	LC	SM	UCCAAAG	GGAAGAG	CGCUUCC				16S Ribosomal RNA	16S Ribosomal RNA	16S Ribosomal RNA	thermus thermophilus	thermus thermophilus	thermus thermophilus		O2'(hydroxyl)-O3'[3.52]_O2'(hydroxyl)-O2'(hydroxyl)[3.05]_N3-O2'(hydroxyl)[2.99]	(2,2)	3	3	7	7	0	0	0	0	0
4y4o.cif1	intra	153	354	1a.A.196.	1a.G.142.	1a.C.221.	WC	19-XIX	cWW	cW-W	I	A|G-C	JC	S	S	LC	LC	SM	CCAAAGG	GAAGAGG	CCGCUUC				16S Ribosomal RNA	16S Ribosomal RNA	16S Ribosomal RNA	thermus thermophilus	thermus thermophilus	thermus thermophilus	N1-O2'(hydroxyl)[2.36]	O2'(hydroxyl)-O2'(hydroxyl)[2.92]	(2,2)	3	3	7	7	0	0	0	0	0	tWS
4y4o.cif1	intra	150	351	1a.A.262.	1a.C.131.	1a.G.231.	WC	19-XIX	cWW	cW-W	II	A|C-G	HC	S	S	LR	LR	SM	GGUAAUG	UGACCUA	AUGGGCC				16S Ribosomal RNA	16S Ribosomal RNA	16S Ribosomal RNA	thermus thermophilus	thermus thermophilus	thermus thermophilus	O2'(hydroxyl)-O3'[3.39]_O2'(hydroxyl)-O2'(hydroxyl)[2.68]_N3-O2'(hydroxyl)[2.61]		(3,3)	6	7	2	2	1	0	0	0	1
4y4o.cif1	intra	150	351	1a.A.263.	1a.U.129.	1a.G.232.	WB	28-XXVIII	cWW	cW-W	X	A|U-G	HC	S	S	LR	LR	SM	GUAAUGG	GGGUGAC	UGGGCCC				16S Ribosomal RNA	16S Ribosomal RNA	16S Ribosomal RNA	thermus thermophilus	thermus thermophilus	thermus thermophilus		N1-O2'(hydroxyl)[2.99]_N3-N2(amino)[3.38]	(3,3)	6	7	8	8	1	0	0	0	1		tWS
4y4o.cif1	intra	0	355	1a.A.282.	1a.G.247.	1a.C.277.	WC	19-XIX	cWW	cW-W	I	A|G-C	IC	S	S	LC	LC	SM	ACGACGG	UCAGCUA	AGGCGAC				16S Ribosomal RNA	16S Ribosomal RNA	16S Ribosomal RNA	thermus thermophilus	thermus thermophilus	thermus thermophilus	N1-O2'(hydroxyl)[2.67]_N3-N2(amino)[2.85]	O2'(hydroxyl)-O2'(hydroxyl)[3.08]	(1,1)	3	6	3	3	0	0	0	0	0	tSS
4y4o.cif1	intra	149	350	1a.A.353.	1a.G.113.	1a.C.314.	WC	19-XIX	cWW	cW-W	I	A|G-C	JC	S	S	LC	LC	SM	GGCAGCA	CGGGUGA	CCACAGG				16S Ribosomal RNA	16S Ribosomal RNA	16S Ribosomal RNA	thermus thermophilus	thermus thermophilus	thermus thermophilus	O3'-O2'(hydroxyl)[3.14]_O2'(hydroxyl)-O2'(hydroxyl)[2.81]_O2'(hydroxyl)-N3[2.74]_N3-N2(amino)[3.34]	N1-O2'(hydroxyl)[3.54]	(3,2)	5	3	3	3	0	1	0	0	1	cSS
4y4o.cif1	intra	154	356	1a.A.373.	1a.C.370.	1a.G.391.	WC	19-XIX	cWW	cW-W	X	A|C-G	IC	S	S	LC	LC	SM	CGCAAUG	UUCCGCA	GACGGAG				16S Ribosomal RNA	16S Ribosomal RNA	16S Ribosomal RNA	thermus thermophilus	thermus thermophilus	thermus thermophilus		N6(amino)-N3[2.70]_N1-O2'(hydroxyl)[2.93]	(3,2)	4	4	3	3	1	0	0	0	1		cWS
4y4o.cif1	intra	154	356	1a.A.374.	1a.G.371.	1a.C.390.	WC	19-XIX	cWW	cW-W	X	A|G-C	IC	S	S	LC	LC	SM	GCAAUGG	UCCGCAA	UGACGGA				16S Ribosomal RNA	16S Ribosomal RNA	16S Ribosomal RNA	thermus thermophilus	thermus thermophilus	thermus thermophilus	N6(amino)*N2(amino)[3.23]	N6(amino)-O2(carbonyl)[3.05]_N1-O2'(hydroxyl)[2.69]	(3,2)	4	4	3	3	1	0	0	0	1	cHS	cWS
4y4o.cif1	intra	154	356	1a.A.482.	1a.C.370.	1a.G.391.	WC	19-XIX	cWW	cW-W	I	A|C-G	IC	S	S	LR	LR	SM	CUGACGG	UUCCGCA	GACGGAG				16S Ribosomal RNA	16S Ribosomal RNA	16S Ribosomal RNA	thermus thermophilus	thermus thermophilus	thermus thermophilus	O2'(hydroxyl)-O2'(hydroxyl)[2.82]_O2'(hydroxyl)-O2(carbonyl)[2.83]		(3,2)	4	10	3	3	0	0	1	0	1
4y4o.cif1	intra	155	357	1a.A.509.	1a.G.502.	1a.C.543.	WC	19-XIX	cWW	cW-W	II	A|G-C	HP	S	S	LR	LR	SM	GCCAACU	AGCGCCG	GGGCGCG				16S Ribosomal RNA	16S Ribosomal RNA	16S Ribosomal RNA	thermus thermophilus	thermus thermophilus	thermus thermophilus		N3-O2'(hydroxyl)[2.44]	(2,2)	3	3	5	5	0	0	0	0	0		cSS
4y4o.cif1	intra	155	357	1a.A.510.	1a.C.503.	1a.G.542.	WC	19-XIX	cWW	cW-W	I	A|C-G	HP	S	S	LR	LR	SM	CCAACUC	GCGCCGG	AGGGCGC				16S Ribosomal RNA	16S Ribosomal RNA	16S Ribosomal RNA	thermus thermophilus	thermus thermophilus	thermus thermophilus	N1-O2'(hydroxyl)[2.89]	O2'(hydroxyl)-O2'(hydroxyl)[2.69]_O2'(hydroxyl)-N3[3.23]_N3-N2(amino)[2.92]	(2,2)	3	3	5	5	0	0	0	0	0		cSS
4y4o.cif1	intra	0	358	1a.A.532.	1a.U.1052.	1a.G.1206.	WB	28-XXVIII	cWW	cW-W	X	A|U-G	IC	S	S	LR	LR	SM	GGUAAUA	UGCUGCA	CAUGMCC				16S Ribosomal RNA	16S Ribosomal RNA	16S Ribosomal RNA	thermus thermophilus	thermus thermophilus	thermus thermophilus		N6(amino)-O2'(hydroxyl)[2.71]_N1-N2(amino)[2.82]	(1,1)	3	7	3	3	1	1	0	0	1		tWS
4y4o.cif1	intra	0	359	1a.A.535.	1a.C.522.	1a.7MG.527.	WC	19-XIX	cWW	cW-W	X	A|C-g	IC	S	S	LC	LC	SM	AAUACGG	CAGCAGC	GCCMCGG	abAB	1,2,3,-1,-3,-2	3	16S Ribosomal RNA	16S Ribosomal RNA	16S Ribosomal RNA	thermus thermophilus	thermus thermophilus	thermus thermophilus		N1-O2'(hydroxyl)[2.61]	(1,1)	3	7	2	2	0	1	0	1	1
4y4o.cif1	intra	156	360	1a.A.572.	1a.C.19.	1a.G.916.	WC	19-XIX	cWW	cW-W	I	A|C-G	JP	S	S	LR	LR	SM	CGUAAAG	AUCCUGG	AAAGGAA	abAB	1,2,-1,-2	2	16S Ribosomal RNA	16S Ribosomal RNA	16S Ribosomal RNA	thermus thermophilus	thermus thermophilus	thermus thermophilus	N1-O2'(hydroxyl)[2.60]	O2'(hydroxyl)-O2'(hydroxyl)[2.82]_N3-N2(amino)[3.10]	(2,2)	4	5	3	3	1	0	0	0	1		cSS
4y4o.cif1	intra	157	361	1a.A.573.	1a.G.567.	1a.C.883.	WC	19-XIX	cWW	cW-W	II	A|G-C	JP	S	S	LR	LR	SM	GUAAAGG	CUGGGCG	CGCCUGG				16S Ribosomal RNA	16S Ribosomal RNA	16S Ribosomal RNA	thermus thermophilus	thermus thermophilus	thermus thermophilus		O2'(hydroxyl)-O3'[3.17]_O2'(hydroxyl)-O2'(hydroxyl)[2.73]_N3-O2'(hydroxyl)[2.66]	(2,2)	3	5	3	3	1	0	0	0	1		cSS
4y4o.cif1	intra	157	361	1a.A.574.	1a.G.568.	1a.C.882.	WC	19-XIX	cWW	cW-W	I	A|G-C	JP	S	S	LR	LR	SM	UAAAGGG	UGGGCGU	CCGCCUG				16S Ribosomal RNA	16S Ribosomal RNA	16S Ribosomal RNA	thermus thermophilus	thermus thermophilus	thermus thermophilus	N1-O2'(hydroxyl)[2.49]_N3-N2(amino)[3.16]	O2'(hydroxyl)-O2'(hydroxyl)[2.76]_O2'(hydroxyl)-O2(carbonyl)[3.06]	(2,2)	3	5	3	3	0	0	0	0	0	tSS
4y4o.cif1	intra	158	362	1a.A.607.	1a.C.291.	1a.G.309.	WC	19-XIX	cWW	cW-W	X	A|C-G	IC	S	S	LR	LR	SM	GUGAAAG	AGCCGGU	GCCGGCC				16S Ribosomal RNA	16S Ribosomal RNA	16S Ribosomal RNA	thermus thermophilus	thermus thermophilus	thermus thermophilus		N6(amino)-N3[3.43]_N1-O2'(hydroxyl)[2.45]	(2,2)	3	6	4	4	1	0	0	0	1		cWS
4y4o.cif1	intra	158	362	1a.A.608.	1a.G.292.	1a.C.308.	WC	19-XIX	cWW	cW-W	X	A|G-C	IC	S	S	LR	LR	SM	UGAAAGA	GCCGGUC	GGCCGGC				16S Ribosomal RNA	16S Ribosomal RNA	16S Ribosomal RNA	thermus thermophilus	thermus thermophilus	thermus thermophilus	N6(amino)-O2'(hydroxyl)[2.55]_N6(amino)-N3[3.29]_N1-N2(amino)[3.09]		(2,2)	3	6	4	4	1	0	0	0	1	tWS
4y4o.cif1	intra	159	363	1a.A.621.	1a.G.41.	1a.C.401.	WC	19-XIX	cWW	cW-W	II	A|G-C	HC	S	S	LR	LR	SM	CUCAACC	GGCGGCG	CGCCGCU				16S Ribosomal RNA	16S Ribosomal RNA	16S Ribosomal RNA	thermus thermophilus	thermus thermophilus	thermus thermophilus		O2'(hydroxyl)-O3'[3.01]_O2'(hydroxyl)-O2'(hydroxyl)[2.80]_N3-O2'(hydroxyl)[2.64]	(2,2)	3	5	6	6	0	0	0	0	0		cSS
4y4o.cif1	intra	159	363	1a.A.622.	1a.G.42.	1a.C.400.	WC	19-XIX	cWW	cW-W	I	A|G-C	HC	S	S	LR	LR	SM	UCAACCG	GCGGCGU	ACGCCGC				16S Ribosomal RNA	16S Ribosomal RNA	16S Ribosomal RNA	thermus thermophilus	thermus thermophilus	thermus thermophilus	N1-O2'(hydroxyl)[2.70]_N3-N2(amino)[3.16]	O2'(hydroxyl)-O2(carbonyl)[3.39]	(2,2)	3	5	6	6	0	0	0	0	0	tSS
4y4o.cif1	intra	0	364	1a.A.642.	1a.U.598.	1a.A.640.	WC	20-XX	cWW	cW-W	X	A|U-A	BC	S	S	LC	LC	SM	GAUACGC	GCGUCCC	GGGAUAC				16S Ribosomal RNA	16S Ribosomal RNA	16S Ribosomal RNA	thermus thermophilus	thermus thermophilus	thermus thermophilus	N6(amino)-O2(carbonyl)[3.08]		(1,1)	3	2	8	8	0	0	0	1	1	cW.
4y4o.cif1	intra	160	365	1a.A.695.	1a.G.786.	1a.C.796.	WC	19-XIX	cWW	cW-W	X	A|G-C	HC	S	S	LR	LR	SM	UGAAAUG	CCGGAUU	UACCCGG				16S Ribosomal RNA	16S Ribosomal RNA	16S Ribosomal RNA	thermus thermophilus	thermus thermophilus	thermus thermophilus	N1-N2(amino)[3.23]		(2,2)	3	8	4	4	1	0	0	0	1	cWS
4y4o.cif1	intra	160	365	1a.A.696.	1a.G.785.	1a.C.797.	WC	19-XIX	cWW	cW-W	X	A|G-C	HC	S	S	LR	LR	SM	GAAAUGC	ACCGGAU	ACCCGGG				16S Ribosomal RNA	16S Ribosomal RNA	16S Ribosomal RNA	thermus thermophilus	thermus thermophilus	thermus thermophilus		N6(amino)-O2'(hydroxyl)[3.12]_N1-O2'(hydroxyl)[2.57]	(2,2)	3	8	4	4	1	0	0	0	1
4y4o.cif1	inter	0	366	1a.A.702.	1A.G.1877.	1A.C.1916.	WC	19-XIX	cWW	cW-W	X	A|G-C	IC	S	S	LR	LR	SM	CGCAGAU	CCGGAAG	GCCCCGG				16S Ribosomal RNA	23S Ribosomal RNA	23S Ribosomal RNA	thermus thermophilus	thermus thermophilus	thermus thermophilus	N1-N2(amino)[2.88]_N3-O2'(hydroxyl)[3.37]		(1,1)	3	7	5	5	0	0	0	0	0	cWS
4y4o.cif1	intra	0	367	1a.A.704.	1a.G.688.	1a.C.699.	WC	19-XIX	cWW	cW-W	X	A|G-C	IC	S	S	LC	LC	SM	CAGAUAC	GUAGCGG	AUGCGCA				16S Ribosomal RNA	16S Ribosomal RNA	16S Ribosomal RNA	thermus thermophilus	thermus thermophilus	thermus thermophilus	N1-O2'(hydroxyl)[2.41]_N3-N2(amino)[3.40]		(1,1)	3	7	2	2	0	0	0	0	0	tSS
4y4o.cif1	intra	161	368	1a.A.728.	1a.C.578.	1a.G.763.	WC	19-XIX	cWW	cW-W	II	A|C-G	HC	S	S	LR	LR	SM	GCGAAGG	GGGCGUG	GGCGCGA				16S Ribosomal RNA	16S Ribosomal RNA	16S Ribosomal RNA	thermus thermophilus	thermus thermophilus	thermus thermophilus	O2'(hydroxyl)-O3'[3.03]_O2'(hydroxyl)-O2'(hydroxyl)[2.97]_N3-O2'(hydroxyl)[2.61]		(2,2)	3	4	4	4	1	0	0	0	1
4y4o.cif1	intra	161	368	1a.A.729.	1a.G.577.	1a.C.764.	WC	19-XIX	cWW	cW-W	I	A|G-C	HC	S	S	LR	LR	SM	CGAAGGC	AGGGCGU	GCGCGAA				16S Ribosomal RNA	16S Ribosomal RNA	16S Ribosomal RNA	thermus thermophilus	thermus thermophilus	thermus thermophilus	O2'(hydroxyl)-O2'(hydroxyl)[3.41]_N3-N2(amino)[3.34]	N1-O2'(hydroxyl)[2.79]	(2,2)	3	4	4	4	0	0	0	0	0	cSS	tWS
4y4o.cif1	intra	0	369	1a.A.753.	1a.G.588.	1a.C.651.	WC	19-XIX	cWW	cW-W	X	A|G-C	JC	S	S	LC	LC	SM	GUGACGC	GCGGCCU	AGGCUAG				16S Ribosomal RNA	16S Ribosomal RNA	16S Ribosomal RNA	thermus thermophilus	thermus thermophilus	thermus thermophilus	O2'(hydroxyl)-N7[2.74]	OP2-N4(amino)[2.85]	(1,1)	3	3	7	7	1	0	1	0	1
4y4o.cif1	intra	162	370	1a.A.766.	1a.U.1510.	1a.G.1525.	WB	28-XXVIII	cWW	cW-W	X	A|U-G	JP	S	S	LR	LR	SM	GCGAAAG	AGCUGUA	UGCGGCU				16S Ribosomal RNA	16S Ribosomal RNA	16S Ribosomal RNA	thermus thermophilus	thermus thermophilus	thermus thermophilus		N1-N2(amino)[3.02]_N3-O2'(hydroxyl)[3.21]	(2,2)	3	4	9	9	1	0	0	0	1		cWS
4y4o.cif1	intra	162	370	1a.A.767.	1a.G.1511.	1a.C.1524.	WC	19-XIX	cWW	cW-W	I	A|G-C	JP	S	S	LR	LR	SM	CGAAAGC	GCUGUAC	GUGCGGC				16S Ribosomal RNA	16S Ribosomal RNA	16S Ribosomal RNA	thermus thermophilus	thermus thermophilus	thermus thermophilus	N3-N2(amino)[2.83]	O3'-O2'(hydroxyl)[2.90]_O2'(hydroxyl)-O2'(hydroxyl)[2.92]_O2'(hydroxyl)-O2(carbonyl)[2.69]	(2,2)	3	4	9	9	1	0	0	0	1	tSS
4y4o.cif1	intra	0	371	1a.A.777.	1a.A.676.	1a.G.714.	IM	08-VIII	cWW	cW-W	X	A|A-G	BC	JC	JC	LR	LR	SM	GGGAGCA	GGAAUUC	GAGGAAC				16S Ribosomal RNA	16S Ribosomal RNA	16S Ribosomal RNA	thermus thermophilus	thermus thermophilus	thermus thermophilus		N3-N2(amino)[2.71]	(1,1)	3	3	5	12	1	1	0	0	1
4y4o.cif1	intra	156	360	1a.A.864.	1a.C.18.	1a.G.917.	WC	19-XIX	cWW	cW-W	I	A|C-G	HPJP	S	S	LR	LR	SM	GCUAACG	GAUCCUG	AAGGAAU	abAB	1,2,-1,-2	2	16S Ribosomal RNA	16S Ribosomal RNA	16S Ribosomal RNA	thermus thermophilus	thermus thermophilus	thermus thermophilus	O2'(hydroxyl)-O2'(hydroxyl)[3.09]	N1-O2'(hydroxyl)[2.79]_N3-N2(amino)[3.05]	(2,2)	4	2	3	3	0	0	1	0	1		t.S
4y4o.cif1	intra	0	372	1a.A.873.	1a.C.862.	1a.G.867.	WC	19-XIX	cWW	cW-W	I	A|C-G	JC	S	S	LC	LC	SM	UUAAGCG	AAGCUAA	AACGCGU	abAB	1,2,3,-1,-3,-2	3	16S Ribosomal RNA	16S Ribosomal RNA	16S Ribosomal RNA	thermus thermophilus	thermus thermophilus	thermus thermophilus		N1-O2'(hydroxyl)[2.61]	(1,1)	3	5	2	2	0	0	0	0	0		tWS
4y4o.cif1	intra	0	373	1a.A.900.	1a.G.769.	1a.C.810.	WC	19-XIX	cWW	cW-W	X	A|G-C	HC	S	S	LR	LR	SM	CGCAAGG	AAAGCGU	ACGCCCU				16S Ribosomal RNA	16S Ribosomal RNA	16S Ribosomal RNA	thermus thermophilus	thermus thermophilus	thermus thermophilus	N1-N2(amino)[3.03]		(1,1)	3	4	6	6	1	0	0	0	1	cWS
4y4o.cif1	intra	0	374	1a.A.909.	1a.A.1413.	1a.G.1487.	IM	08-VIII	cWW	cW-W	X	A|A-G	IC	IC	IC	LR	LR	SM	GAAACUC	GCCAUGG	CUGGGGC				16S Ribosomal RNA	16S Ribosomal RNA	16S Ribosomal RNA	thermus thermophilus	thermus thermophilus	thermus thermophilus	O2'(hydroxyl)-O3'[3.31]_O2'(hydroxyl)-O2'(hydroxyl)[2.75]_N3-O2'(hydroxyl)[2.72]		(1,1)	3	4	1	1	1	0	0	0	1
4y4o.cif1	intra	0	375	1a.A.913.	1a.U.12.	1a.G.22.	WB	28-XXVIII	cWW	cW-W	I	A|U-G	JP	S	S	LC	LC	SM	CUCAAAG	GAGUUUG	CUGGCUC	abAB	1,2,-1,-2	1	16S Ribosomal RNA	16S Ribosomal RNA	16S Ribosomal RNA	thermus thermophilus	thermus thermophilus	thermus thermophilus		N1-O2'(hydroxyl)[2.67]_N3-N2(amino)[3.23]	(1,1)	3	3	4	4	0	0	0	0	0		tSS
4y4o.cif1	intra	163	376	1a.A.958.	1a.C.985.	1a.G.1220.	WC	19-XIX	cWW	cW-W	II	A|C-G	JC	S	S	LC	LC	SM	UUUAAUU	UACCAGG	CCUGGGC				16S Ribosomal RNA	16S Ribosomal RNA	16S Ribosomal RNA	thermus thermophilus	thermus thermophilus	thermus thermophilus	O2'(hydroxyl)-O3'[3.27]_O2'(hydroxyl)-O2'(hydroxyl)[2.82]_N3-O2'(hydroxyl)[2.51]		(2,2)	3	6	7	7	0	0	0	0	0
4y4o.cif1	intra	163	376	1a.A.959.	1a.C.984.	1a.G.1221.	WC	19-XIX	cWW	cW-W	I	A|C-G	JC	S	S	LC	LC	SM	UUAAUUC	UUACCAG	CUGGGCG				16S Ribosomal RNA	16S Ribosomal RNA	16S Ribosomal RNA	thermus thermophilus	thermus thermophilus	thermus thermophilus	O2'(hydroxyl)-O2'(hydroxyl)[2.65]_O2'(hydroxyl)-O2(carbonyl)[2.89]	N1-O2'(hydroxyl)[2.78]_N3-N2(amino)[3.12]	(2,2)	3	6	7	7	0	0	0	0	0		tWS
4y4o.cif1	intra	0	377	1a.A.996.	1a.G.993.	1a.C.1045.	WC	19-XIX	cWW	cW-W	X	A|G-C	JC	JC	JC	SM	SM	SM	GACAUGC	CUUGACA	GCACAGG				16S Ribosomal RNA	16S Ribosomal RNA	16S Ribosomal RNA	thermus thermophilus	thermus thermophilus	thermus thermophilus		N6(amino)-O2(carbonyl)[3.10]_N1-O2'(hydroxyl)[2.60]	(1,1)	2	6	6	2	0	0	0	0	0		cWS
4y4o.cif1	intra	164	378	1a.A.1015.	1a.G.988.	1a.C.1217.	WC	19-XIX	cWW	cW-W	X	A|G-C	HC	S	S	LR	LR	SM	UGAAAGC	CAGGCCU	CGGCCUG				16S Ribosomal RNA	16S Ribosomal RNA	16S Ribosomal RNA	thermus thermophilus	thermus thermophilus	thermus thermophilus	N6(amino)-O2'(hydroxyl)[3.35]		(2,1)	3	4	7	7	1	0	0	0	1
4y4o.cif1	intra	164	378	1a.A.1016.	1a.G.988.	1a.C.1217.	WC	19-XIX	cWW	cW-W	I	A|G-C	HC	S	S	LR	LR	SM	GAAAGCC	CAGGCCU	CGGCCUG				16S Ribosomal RNA	16S Ribosomal RNA	16S Ribosomal RNA	thermus thermophilus	thermus thermophilus	thermus thermophilus	N1-O2'(hydroxyl)[3.47]_N3-N2(amino)[3.07]	O2'(hydroxyl)-O2'(hydroxyl)[2.78]_O2'(hydroxyl)-O2(carbonyl)[2.78]	(2,1)	3	4	7	7	1	0	0	0	1	tSS
4y4o.cif1	intra	0	379	1a.A.1080.	1a.A.16.	1a.A.919.	NA	n/a	cWW	cW-W	X	A|A-A	HC	HP	JI	LR	LR	LR	GUGAGGU	UUGAUCC	GGAAUUG				16S Ribosomal RNA	16S Ribosomal RNA	16S Ribosomal RNA	thermus thermophilus	thermus thermophilus	thermus thermophilus	O2'(hydroxyl)-O2'(hydroxyl)[2.82]_O2'(hydroxyl)-N3[2.73]	N6(amino)-O2'(hydroxyl)[3.20]_N1-O2'(hydroxyl)[2.52]	(1,1)	3	4	4	2	1	0	0	0	1	cSW	tWS
4y4o.cif1	intra	0	380	1a.A.1101.	1a.G.1074.	1a.U.1083.	WB	28-XXVIII	cWW	cW-W	I	A|G-U	JC	S	S	LC	LC	SM	CGCAACG	CGUGCCG	AGGUGUU				16S Ribosomal RNA	16S Ribosomal RNA	16S Ribosomal RNA	thermus thermophilus	thermus thermophilus	thermus thermophilus	N1-O2'(hydroxyl)[2.51]_N3-N2(amino)[3.03]		(1,1)	3	3	3	3	1	0	0	0	1	t.S
4y4o.cif1	intra	165	381	1a.A.1130.	1a.C.1128.	1a.G.1144.	WC	19-XIX	cWW	cW-W	X	A|C-G	BC	S	S	LC	LC	SM	GCCAGCG	UUGCCAG	CGGGCAC				16S Ribosomal RNA	16S Ribosomal RNA	16S Ribosomal RNA	thermus thermophilus	thermus thermophilus	thermus thermophilus		N6(amino)-N3[3.57]	(2,2)	4	2	3	3	0	0	0	0	0
4y4o.cif1	intra	165	381	1a.A.1130.	1a.C.1129.	1a.G.1143.	WC	19-XIX	cWW	cW-W	X	A|C-G	BC	S	S	LC	LC	SM	GCCAGCG	UGCCAGC	CCGGGCA				16S Ribosomal RNA	16S Ribosomal RNA	16S Ribosomal RNA	thermus thermophilus	thermus thermophilus	thermus thermophilus	N6(amino)-O2(carbonyl)[2.78]		(2,2)	4	2	3	3	0	0	0	0	0	cHS
4y4o.cif1	intra	165	381	1a.A.1146.	1a.C.1128.	1a.G.1144.	WC	19-XIX	cWW	cW-W	X	A|C-G	IC	S	S	LC	LC	SM	GGCACUC	UUGCCAG	CGGGCAC				16S Ribosomal RNA	16S Ribosomal RNA	16S Ribosomal RNA	thermus thermophilus	thermus thermophilus	thermus thermophilus		N7-N2(amino)[3.06]	(2,2)	4	3	3	3	0	0	0	0	0	tH.	cHS
4y4o.cif1	intra	166	382	1a.A.1168.	1a.G.1088.	1a.C.1097.	WC	19-XIX	cWW	cW-W	X	A|G-C	HC	S	S	LR	LR	SM	GCGAAAG	UUGGGUU	GUCCCGC				16S Ribosomal RNA	16S Ribosomal RNA	16S Ribosomal RNA	thermus thermophilus	thermus thermophilus	thermus thermophilus	N1-N2(amino)[3.41]		(3,2)	3	4	3	3	1	0	0	0	1	tWS
4y4o.cif1	intra	166	382	1a.A.1169.	1a.G.1088.	1a.C.1097.	WC	19-XIX	cWW	cW-W	II	A|G-C	HC	S	S	LR	LR	SM	CGAAAGC	UUGGGUU	GUCCCGC				16S Ribosomal RNA	16S Ribosomal RNA	16S Ribosomal RNA	thermus thermophilus	thermus thermophilus	thermus thermophilus		O2'(hydroxyl)-O3'[3.42]_O2'(hydroxyl)-O2'(hydroxyl)[2.95]_N3-O2'(hydroxyl)[2.60]	(3,2)	3	4	3	3	1	0	0	0	1
4y4o.cif1	intra	166	382	1a.A.1170.	1a.G.1089.	1a.C.1096.	WC	19-XIX	cWW	cW-W	I	A|G-C	HC	S	S	LR	LR	SM	GAAAGCG	UGGGUUA	AGUCCCG				16S Ribosomal RNA	16S Ribosomal RNA	16S Ribosomal RNA	thermus thermophilus	thermus thermophilus	thermus thermophilus	N3-N2(amino)[3.10]	O2'(hydroxyl)-O2'(hydroxyl)[2.51]_O2'(hydroxyl)-O2(carbonyl)[3.18]	(3,2)	3	4	3	3	1	0	0	0	1	tSS
4y4o.cif1	intra	0	383	1a.A.1213.	1a.C.990.	1a.G.1215.	WC	19-XIX	cWW	cW-W	X	A|C-G	JC	S	S	LC	LC	SM	CUUACGG	GGCCUUG	UACGGCC				16S Ribosomal RNA	16S Ribosomal RNA	16S Ribosomal RNA	thermus thermophilus	thermus thermophilus	thermus thermophilus		O2'(hydroxyl)-N7[2.81]	(1,1)	3	4	7	7	0	0	1	1	1
4y4o.cif1	intra	0	384	1a.A.1227.	1a.G.954.	1a.C.1226.	WC	19-XIX	cWW	cW-W	X	A|G-C	BC	S	S	LC	LC	SM	GACACAC	GUGGUUU	CGACACA				16S Ribosomal RNA	16S Ribosomal RNA	16S Ribosomal RNA	thermus thermophilus	thermus thermophilus	thermus thermophilus	N1-N2(amino)[2.75]		(1,1)	3	1	2	2	0	0	0	0	0	tWS
4y4o.cif1	intra	0	385	1a.A.1238.	1a.G.1241.	1a.C.1296.	WC	19-XIX	cWW	cW-W	X	A|G-C	JC	S	S	LC	LC	SM	UACAAUG	AAUGCCC	GGGCCCA				16S Ribosomal RNA	16S Ribosomal RNA	16S Ribosomal RNA	thermus thermophilus	thermus thermophilus	thermus thermophilus	N1-N2(amino)[2.91]_N3-O2'(hydroxyl)[2.63]		(1,1)	3	5	7	7	0	0	0	0	0	cWS
4y4o.cif1	intra	167	386	1a.A.1250.	1a.G.1353.	1a.C.1369.	WC	19-XIX	cWW	cW-W	X	A|G-C	IC	S	S	LR	LR	SM	UACAAAG	AUCGCGG	CCGCGGU				16S Ribosomal RNA	16S Ribosomal RNA	16S Ribosomal RNA	thermus thermophilus	thermus thermophilus	thermus thermophilus	N1-N2(amino)[3.08]		(5,4)	4	5	7	7	0	0	0	0	0	tWS
4y4o.cif1	intra	167	386	1a.A.1251.	1a.G.1353.	1a.C.1369.	WC	19-XIX	cWW	cW-W	X	A|G-C	IC	S	S	LR	LR	SM	ACAAAGC	AUCGCGG	CCGCGGU				16S Ribosomal RNA	16S Ribosomal RNA	16S Ribosomal RNA	thermus thermophilus	thermus thermophilus	thermus thermophilus		O2'(hydroxyl)-O3'[2.72]_O2'(hydroxyl)-O2'(hydroxyl)[2.70]_N3-O2'(hydroxyl)[2.82]	(5,4)	4	5	7	7	0	0	0	0	0
4y4o.cif1	intra	167	386	1a.A.1251.	1a.C.1354.	1a.G.1368.	WC	19-XIX	cWW	cW-W	X	A|C-G	IC	S	S	LR	LR	SM	ACAAAGC	UCGCGGA	GCCGCGG				16S Ribosomal RNA	16S Ribosomal RNA	16S Ribosomal RNA	thermus thermophilus	thermus thermophilus	thermus thermophilus	N6(amino)-O2'(hydroxyl)[3.31]_N1-O2'(hydroxyl)[2.86]		(5,4)	4	5	7	7	0	0	0	0	0
4y4o.cif1	intra	168	387	1a.A.1261.	1a.C.1260.	1a.G.1274.	WC	19-XIX	cWW	cW-W	X	A|C-G	IC	IC	IC	SM	SM	SM	GCCACCC	UGCCACC	GGGGAGC				16S Ribosomal RNA	16S Ribosomal RNA	16S Ribosomal RNA	thermus thermophilus	thermus thermophilus	thermus thermophilus	O5'-O2'(hydroxyl)[3.09]_O4'-O2'(hydroxyl)[2.86]	N7-N2(amino)[2.38]_N6(amino)-O2'(hydroxyl)[3.07]_N6(amino)-N3[3.08]	(2,1)	2	2	2	2	0	0	0	0	0		tHS
4y4o.cif1	intra	169	388	1a.A.1268.	1a.G.1311.	1a.C.1326.	WC	19-XIX	cWW	cW-W	II	A|G-C	HC	S	S	LR	LR	SM	GGCAACG	UGGGGUC	GACCCCA				16S Ribosomal RNA	16S Ribosomal RNA	16S Ribosomal RNA	thermus thermophilus	thermus thermophilus	thermus thermophilus		O2'(hydroxyl)-O3'[3.10]_O2'(hydroxyl)-O2'(hydroxyl)[2.74]_N3-O2'(hydroxyl)[2.91]	(2,2)	3	4	7	7	1	0	0	0	1		cSS
4y4o.cif1	intra	169	388	1a.A.1269.	1a.G.1312.	1a.C.1325.	WC	19-XIX	cWW	cW-W	I	A|G-C	HC	S	S	LR	LR	SM	GCAACGG	GGGGUCU	CGACCCC				16S Ribosomal RNA	16S Ribosomal RNA	16S Ribosomal RNA	thermus thermophilus	thermus thermophilus	thermus thermophilus	N1-O2'(hydroxyl)[2.65]_N3-N2(amino)[2.83]	O2'(hydroxyl)-O2'(hydroxyl)[2.95]_O2'(hydroxyl)-O2(carbonyl)[3.16]	(2,2)	3	4	7	7	1	0	0	0	1	tSS
4y4o.cif1	intra	168	387	1a.A.1275.	1a.C.1260.	1a.G.1274.	WC	19-XIX	cWW	cW-W	X	A|C-G	IC	IC	IC	SM	SM	SM	GGGAGCU	UGCCACC	GGGGAGC				16S Ribosomal RNA	16S Ribosomal RNA	16S Ribosomal RNA	thermus thermophilus	thermus thermophilus	thermus thermophilus	N6(amino)-O2(carbonyl)[2.30]	O4'-O2'(hydroxyl)[3.15]	(2,1)	2	2	2	2	1	0	0	0	1	tH.
4y4o.cif1	intra	0	389	1a.A.1280.	1a.G.1124.	1a.C.1149.	WC	19-XIX	cWW	cW-W	X	A|G-C	IC	S	S	LR	LR	SM	CUAAUCG	UUAGUUG	ACUCUAA				16S Ribosomal RNA	16S Ribosomal RNA	16S Ribosomal RNA	thermus thermophilus	thermus thermophilus	thermus thermophilus		N6(amino)-O2(carbonyl)[3.06]_N1-O2'(hydroxyl)[2.63]	(1,1)	3	4	7	7	0	0	0	0	0		cWS
4y4o.cif1	intra	167	386	1a.A.1287.	1a.C.1352.	1a.G.1370.	WC	19-XIX	cWW	cW-W	X	A|C-G	IC	S	S	LR	LR	SM	CAAAAAG	AAUCGCG	CGCGGUG				16S Ribosomal RNA	16S Ribosomal RNA	16S Ribosomal RNA	thermus thermophilus	thermus thermophilus	thermus thermophilus		N1-N2(amino)[3.02]	(5,4)	4	5	7	7	0	0	0	0	0		tWS
4y4o.cif1	intra	167	386	1a.A.1288.	1a.C.1352.	1a.G.1370.	WC	19-XIX	cWW	cW-W	II	A|C-G	IC	S	S	LR	LR	SM	AAAAAGG	AAUCGCG	CGCGGUG				16S Ribosomal RNA	16S Ribosomal RNA	16S Ribosomal RNA	thermus thermophilus	thermus thermophilus	thermus thermophilus	O2'(hydroxyl)-O3'[2.76]_O2'(hydroxyl)-O2'(hydroxyl)[2.94]_N3-O2'(hydroxyl)[2.61]		(5,4)	4	5	7	7	0	0	0	0	0
4y4o.cif1	intra	167	386	1a.A.1289.	1a.U.1351.	1a.G.1371.	WB	28-XXVIII	cWW	cW-W	X	A|U-G	IC	S	S	LR	LR	SM	AAAAGGU	UAAUCGC	GCGGUGA				16S Ribosomal RNA	16S Ribosomal RNA	16S Ribosomal RNA	thermus thermophilus	thermus thermophilus	thermus thermophilus		N1-O2'(hydroxyl)[2.74]_N3-N2(amino)[3.23]	(5,4)	4	5	7	7	0	0	0	0	0		tSS
4y4o.cif1	intra	0	390	1a.A.1333.	1a.A.946.	1a.U.1235.	WC	20-XX	cWW	cW-W	II	A|A-U	JC	S	S	LC	LC	SM	UGAAGCC	UGGAGCA	UGCUACA				16S Ribosomal RNA	16S Ribosomal RNA	16S Ribosomal RNA	thermus thermophilus	thermus thermophilus	thermus thermophilus	O2'(hydroxyl)-O3'[3.01]_O2'(hydroxyl)-O2'(hydroxyl)[2.71]_N3-O2'(hydroxyl)[2.60]		(1,1)	3	10	8	8	0	0	0	0	0	cWS
4y4o.cif1	intra	0	391	1a.A.1398.	1a.G.922.	1a.C.1395.	WC	19-XIX	cWW	cW-W	I	A|G-C	JI	S	S	LC	LC	SM	CACACMG	AUUGACG	GUACACA				16S Ribosomal RNA	16S Ribosomal RNA	16S Ribosomal RNA	thermus thermophilus	thermus thermophilus	thermus thermophilus	N1-O2'(hydroxyl)[2.80]_N3-N2(amino)[3.06]	O2'(hydroxyl)-O2'(hydroxyl)[2.86]_O2'(hydroxyl)-O2(carbonyl)[3.24]	(1,1)	3	7	2	2	0	0	0	0	0	tSS
4y4o.cif1	inter	170	392	1a.A.1418.	1A.G.1970.	1A.C.1980.	WC	19-XIX	cWW	cW-W	I	A|G-C	IC	S	S	LR	LR	SM	GGGAGCG	GUCGGGU	UUCCGAC				16S Ribosomal RNA	23S Ribosomal RNA	23S Ribosomal RNA	thermus thermophilus	thermus thermophilus	thermus thermophilus	N1-O2'(hydroxyl)[2.76]_N3-N2(amino)[3.23]	O2'(hydroxyl)-O2'(hydroxyl)[3.28]	(2,2)	4	2	5	5	1	0	0	0	1	tWS
4y4o.cif1	intra	171	393	1a.A.1433.	1a.G.318.	1a.C.335.	WC	19-XIX	cWW	cW-W	II	A|G-C	IC	S	S	LR	LR	SM	CCGAAGU	AGGGGCA	GGCCCCA				16S Ribosomal RNA	16S Ribosomal RNA	16S Ribosomal RNA	thermus thermophilus	thermus thermophilus	thermus thermophilus		O2'(hydroxyl)-O2'(hydroxyl)[2.76]_N3-O2'(hydroxyl)[2.85]	(2,2)	3	5	5	5	0	0	0	0	0		cSS
4y4o.cif1	intra	171	393	1a.A.1434.	1a.G.319.	1a.C.334.	WC	19-XIX	cWW	cW-W	I	A|G-C	IC	S	S	LR	LR	SM	CGAAGUC	GGGGCAC	GGGCCCC				16S Ribosomal RNA	16S Ribosomal RNA	16S Ribosomal RNA	thermus thermophilus	thermus thermophilus	thermus thermophilus	N1-O2'(hydroxyl)[3.40]_N3-N2(amino)[2.95]	O2'(hydroxyl)-O2'(hydroxyl)[2.47]_O2'(hydroxyl)-O2(carbonyl)[3.04]	(2,2)	3	5	5	5	0	0	0	0	0	tSS
4y4o.cif1	inter	170	392	1a.A.1483.	1A.C.1969.	1A.G.1981.	WC	19-XIX	cWW	cW-W	I	A|C-G	IC	S	S	LR	LR	SM	GUGACUG	UGUCGGG	UCCGACM				16S Ribosomal RNA	23S Ribosomal RNA	23S Ribosomal RNA	thermus thermophilus	thermus thermophilus	thermus thermophilus	O2'(hydroxyl)-O2'(hydroxyl)[2.44]_O2'(hydroxyl)-O2(carbonyl)[3.17]	N1-O2'(hydroxyl)[2.80]_N3-N2(amino)[3.15]	(2,2)	4	2	5	5	1	0	1	0	1		tSS
4y4o.cif1	intra	0	394	1a.A.1502.	1a.C.924.	1a.G.1392.	WC	19-XIX	cWW	cW-W	I	A|C-G	JI	S	S	LR	LR	SM	AACAAGG	UGACGGG	CUUGUAC				16S Ribosomal RNA	16S Ribosomal RNA	16S Ribosomal RNA	thermus thermophilus	thermus thermophilus	thermus thermophilus	N1-O2'(hydroxyl)[2.60]	O5'-O2'(hydroxyl)[2.98]_N3-N2(amino)[3.17]	(1,1)	3	9	3	3	0	1	0	0	1		cSS
4y4o.cif1	intra	172	395	1a.MA6.1518.	1a.5MC.1404.	1a.G.1497.	WC	19-XIX	cWW	cW-W	I	a|c-G	HC	S	S	LR	LR	SM	CGGMMGG	GMCMGUM	GUCGMAA				16S Ribosomal RNA	16S Ribosomal RNA	16S Ribosomal RNA	thermus thermophilus	thermus thermophilus	thermus thermophilus		N1-O2'(hydroxyl)[2.69]	(2,1)	3	4	2	2	0	0	0	0	0
4y4o.cif1	intra	172	395	1a.MA6.1519.	1a.5MC.1404.	1a.G.1497.	WC	19-XIX	cWW	cW-W	I	a|c-G	HC	S	S	LR	LR	SM	GGMMGGU	GMCMGUM	GUCGMAA				16S Ribosomal RNA	16S Ribosomal RNA	16S Ribosomal RNA	thermus thermophilus	thermus thermophilus	thermus thermophilus	O2'(hydroxyl)-O2'(hydroxyl)[2.79]_O2'(hydroxyl)-O2(carbonyl)[2.32]_O3'-O2'(hydroxyl)[3.07]	N3-N2(amino)[3.47]	(2,1)	3	4	2	2	0	0	0	0	0
4y4o.cif1	intra	173	396	2A.A.14.	2A.C.2044.	2A.G.2624.	WC	19-XIX	cWW	cW-W	X	A|C-G	JI	S	S	LR	LR	SM	GUAAGGG	UACCCGU	ACGGGCG	abAcdeDfgFEChBHiGI	1,2,3,4,5,6,7,8,-7,-6,-5,-4,-3,-2,-1,9,10,11,12,13,14,-13,15,16,17,18,19,20,21,22,23,-22,-21,-20,-19,-18,-17,-16,-15,-14,-12,-11,-10,-9,24,25,26,27,28,29,30,-8,-30,-29,-28,-27,-26,-25,-24,31,32,33,34,35,36,-23,-36,-35,-34,-33,-32,-31	24	23S Ribosomal RNA	23S Ribosomal RNA	23S Ribosomal RNA	thermus thermophilus	thermus thermophilus	thermus thermophilus	N1-O2'(hydroxyl)[2.71]		(2,2)	4	6	8	8	1	0	0	0	1		cSS
4y4o.cif1	intra	0	397	2A.A.52.	2A.C.47.	2A.G.178.	WC	19-XIX	cWW	cW-W	I	A|C-G	JC	S	S	LC	LC	SM	AUGAAGG	AGCCGAU	GGGGGGA				23S Ribosomal RNA	23S Ribosomal RNA	23S Ribosomal RNA	thermus thermophilus	thermus thermophilus	thermus thermophilus	O2'(hydroxyl)-O2'(hydroxyl)[3.01]	N1-O2'(hydroxyl)[2.60]_N3-N2(amino)[2.77]	(1,1)	3	6	2	2	0	0	0	0	0		tSS
4y4o.cif1	intra	174	398	2A.A.71.	2A.C.57.	2A.G.70.	WC	19-XIX	cWW	cW-W	X	A|C-G	HP	S	S	LC	LC	SM	GCGAUAA	GGACGUG	UGCGAUA	abAcBC	1,2,3,-1,4,5,-3,-2,-5,-4	1	23S Ribosomal RNA	23S Ribosomal RNA	23S Ribosomal RNA	thermus thermophilus	thermus thermophilus	thermus thermophilus		N1-N2(amino)[3.10]	(2,2)	3	5	3	3	1	0	0	0	1		cWS
4y4o.cif1	intra	174	398	2A.A.73.	2A.G.58.	2A.C.69.	WC	19-XIX	cWW	cW-W	I	A|G-C	HP	S	S	LC	LC	SM	GAUAAGC	GACGUGG	CUGCGAU	abAcBC	1,2,3,-1,4,5,-3,-2,-5,-4	1	23S Ribosomal RNA	23S Ribosomal RNA	23S Ribosomal RNA	thermus thermophilus	thermus thermophilus	thermus thermophilus	N1-O2'(hydroxyl)[2.60]_N3-N2(amino)[3.01]	O2'(hydroxyl)-O2'(hydroxyl)[2.64]_O2'(hydroxyl)-O2(carbonyl)[2.42]	(2,2)	3	5	3	3	0	0	0	0	0	tSS
4y4o.cif1	intra	0	399	2A.A.103.	2A.G.85.	2A.C.97.	WC	19-XIX	cWW	cW-W	I	A|G-C	IC	S	S	LC	LC	SM	UGGAUCC	GGAGCCG	GGGCGUG	abAcBC	1,2,3,-1,4,5,-3,-2,-5,-4	5	23S Ribosomal RNA	23S Ribosomal RNA	23S Ribosomal RNA	thermus thermophilus	thermus thermophilus	thermus thermophilus	N1-O2'(hydroxyl)[2.64]_N3-N2(amino)[3.13]	O2'(hydroxyl)-O2'(hydroxyl)[3.57]	(1,1)	3	6	3	3	0	0	0	0	0	tSS
4y4o.cif1	intra	175	400	2A.A.126.	2A.G.54.	2A.C.116.	WC	19-XIX	cWW	cW-W	II	A|G-C	HC	S	S	LR	LR	SM	GGGAACC	GAAGGAC	GUCCGAA				23S Ribosomal RNA	23S Ribosomal RNA	23S Ribosomal RNA	thermus thermophilus	thermus thermophilus	thermus thermophilus	N1-N2(amino)[3.13]	O2'(hydroxyl)-O3'[2.94]_O2'(hydroxyl)-O2'(hydroxyl)[2.73]_N3-O2'(hydroxyl)[2.72]	(2,2)	3	4	3	3	1	0	0	0	1	tW.
4y4o.cif1	intra	175	400	2A.A.127.	2A.G.55.	2A.C.115.	WC	19-XIX	cWW	cW-W	I	A|G-C	HC	S	S	LR	LR	SM	GGAACCC	AAGGACG	UGUCCGA				23S Ribosomal RNA	23S Ribosomal RNA	23S Ribosomal RNA	thermus thermophilus	thermus thermophilus	thermus thermophilus	N1-O2'(hydroxyl)[2.54]_N3-N2(amino)[2.99]	O2'(hydroxyl)-O2'(hydroxyl)[2.42]_O2'(hydroxyl)-O2(carbonyl)[3.19]	(2,2)	3	4	3	3	1	0	0	0	1	tSS
4y4o.cif1	intra	176	401	2A.A.141.	2A.C.1408.	2A.G.1594.	WC	19-XIX	cWW	cW-W	II	A|C-G	HC	S	S	LR	LR	SM	GGGAACG	UUCCCGC	GCGGGAA	abAcdeDfgFEChBHiGI	1,2,3,4,5,6,7,8,-7,-6,-5,-4,-3,-2,-1,9,10,11,12,13,14,-13,15,16,17,18,19,20,21,22,23,-22,-21,-20,-19,-18,-17,-16,-15,-14,-12,-11,-10,-9,24,25,26,27,28,29,30,-8,-30,-29,-28,-27,-26,-25,-24,31,32,33,34,35,36,-23,-36,-35,-34,-33,-32,-31	15	23S Ribosomal RNA	23S Ribosomal RNA	23S Ribosomal RNA	thermus thermophilus	thermus thermophilus	thermus thermophilus	O2'(hydroxyl)-O2'(hydroxyl)[2.88]_N3-O2'(hydroxyl)[2.59]		(2,2)	3	4	11	11	1	0	0	0	1	cWS	tW.
4y4o.cif1	intra	176	401	2A.A.142.	2A.C.1407.	2A.G.1595.	WC	19-XIX	cWW	cW-W	I	A|C-G	HC	S	S	LR	LR	SM	GGAACGC	CUUCCCG	CGGGAAC	abAcdeDfgFEChBHiGI	1,2,3,4,5,6,7,8,-7,-6,-5,-4,-3,-2,-1,9,10,11,12,13,14,-13,15,16,17,18,19,20,21,22,23,-22,-21,-20,-19,-18,-17,-16,-15,-14,-12,-11,-10,-9,24,25,26,27,28,29,30,-8,-30,-29,-28,-27,-26,-25,-24,31,32,33,34,35,36,-23,-36,-35,-34,-33,-32,-31	15	23S Ribosomal RNA	23S Ribosomal RNA	23S Ribosomal RNA	thermus thermophilus	thermus thermophilus	thermus thermophilus	O2'(hydroxyl)-O2'(hydroxyl)[2.49]_O2'(hydroxyl)-O2(carbonyl)[3.25]	N1-O2'(hydroxyl)[2.52]_N3-N2(amino)[2.78]	(2,2)	3	4	11	11	1	0	0	0	1		tSS
4y4o.cif1	intra	177	402	2A.A.182.	2A.G.44.	2A.C.433.	WC	19-XIX	cWW	cW-W	II	A|G-C	JC	S	S	LC	LC	SM	GGAACCU	CGAGCCG	GUACUCC	abAcdeDfgFEChBHiGI	1,2,3,4,5,6,7,8,-7,-6,-5,-4,-3,-2,-1,9,10,11,12,13,14,-13,15,16,17,18,19,20,21,22,23,-22,-21,-20,-19,-18,-17,-16,-15,-14,-12,-11,-10,-9,24,25,26,27,28,29,30,-8,-30,-29,-28,-27,-26,-25,-24,31,32,33,34,35,36,-23,-36,-35,-34,-33,-32,-31	5	23S Ribosomal RNA	23S Ribosomal RNA	23S Ribosomal RNA	thermus thermophilus	thermus thermophilus	thermus thermophilus		O2'(hydroxyl)-O3'[3.06]_O2'(hydroxyl)-O2'(hydroxyl)[2.88]_N3-O2'(hydroxyl)[2.66]	(2,2)	5	4	2	2	1	0	0	0	1		cSS
4y4o.cif1	intra	178	403	2A.A.190.	2A.C.679.	2A.G.798.	WC	19-XIX	cWW	cW-W	II	A|C-G	HC	S	S	LR	LR	SM	GGGAACU	AACCGGG	CCCGGAG				23S Ribosomal RNA	23S Ribosomal RNA	23S Ribosomal RNA	thermus thermophilus	thermus thermophilus	thermus thermophilus	O2'(hydroxyl)-O3'[3.25]_O2'(hydroxyl)-O2'(hydroxyl)[2.91]_N3-O2'(hydroxyl)[2.68]		(2,2)	3	19	6	6	1	0	0	0	1
4y4o.cif1	intra	178	403	2A.A.191.	2A.C.678.	2A.G.799.	WC	19-XIX	cWW	cW-W	I	A|C-G	HC	S	S	LR	LR	SM	GGAACUG	AAACCGG	CCGGAGA				23S Ribosomal RNA	23S Ribosomal RNA	23S Ribosomal RNA	thermus thermophilus	thermus thermophilus	thermus thermophilus	O2'(hydroxyl)-O2'(hydroxyl)[2.74]_O2'(hydroxyl)-O2(carbonyl)[2.85]	N3-N2(amino)[2.95]	(2,2)	3	19	6	6	1	0	0	0	1		tSS
4y4o.cif1	intra	0	404	2A.A.196.	2A.U.826.	2A.G.831.	WB	28-XXVIII	cWW	cW-W	X	A|U-G	HC	S	S	LR	LR	SM	UGAAACA	GACUUUA	UAGGGUC				23S Ribosomal RNA	23S Ribosomal RNA	23S Ribosomal RNA	thermus thermophilus	thermus thermophilus	thermus thermophilus		N6(amino)-N3[3.12]_N1-N2(amino)[2.85]	(1,1)	3	19	5	5	1	1	0	0	1		tWS
4y4o.cif1	intra	179	405	2A.A.199.	2A.C.2078.	2A.G.2242.	WC	19-XIX	cWW	cW-W	I	A|C-G	HC	S	S	LR	LR	SM	AACAUCU	UUACUGC	GCAGUUU				23S Ribosomal RNA	23S Ribosomal RNA	23S Ribosomal RNA	thermus thermophilus	thermus thermophilus	thermus thermophilus	N1-O2'(hydroxyl)[2.93]	OP1-O2'(hydroxyl)[2.86]	(2,2)	4	19	5	5	0	1	0	0	1
4y4o.cif1	intra	0	406	2A.A.223.	2A.G.407.	2A.C.420.	WC	19-XIX	cWW	cW-W	I	A|G-C	JC	S	S	LR	LR	SM	GAAAGAG	CUGGGCG	CGCCUAA	abAcdeDfgFEChBHiGI	1,2,3,4,5,6,7,8,-7,-6,-5,-4,-3,-2,-1,9,10,11,12,13,14,-13,15,16,17,18,19,20,21,22,23,-22,-21,-20,-19,-18,-17,-16,-15,-14,-12,-11,-10,-9,24,25,26,27,28,29,30,-8,-30,-29,-28,-27,-26,-25,-24,31,32,33,34,35,36,-23,-36,-35,-34,-33,-32,-31	7	23S Ribosomal RNA	23S Ribosomal RNA	23S Ribosomal RNA	thermus thermophilus	thermus thermophilus	thermus thermophilus	N1-O2'(hydroxyl)[2.46]_N3-N2(amino)[3.21]	O3'-O2'(hydroxyl)[3.07]_O2'(hydroxyl)-O2'(hydroxyl)[2.71]_O2'(hydroxyl)-O2(carbonyl)[2.50]	(1,1)	3	11	5	5	1	0	0	0	1	tSS
4y4o.cif1	intra	0	407	2A.A.227.	2A.G.410.	2A.C.417.	WC	19-XIX	cWW	cW-W	X	A|G-C	HC	S	S	LR	LR	SM	GAGAAAU	GGCGGAC	CACCGCC	abAcdeDfgFEChBHiGI	1,2,3,4,5,6,7,8,-7,-6,-5,-4,-3,-2,-1,9,10,11,12,13,14,-13,15,16,17,18,19,20,21,22,23,-22,-21,-20,-19,-18,-17,-16,-15,-14,-12,-11,-10,-9,24,25,26,27,28,29,30,-8,-30,-29,-28,-27,-26,-25,-24,31,32,33,34,35,36,-23,-36,-35,-34,-33,-32,-31	7	23S Ribosomal RNA	23S Ribosomal RNA	23S Ribosomal RNA	thermus thermophilus	thermus thermophilus	thermus thermophilus	N6(amino)-O2'(hydroxyl)[2.69]_N6(amino)-N3[2.94]_N1-N2(amino)[3.45]		(1,1)	3	4	5	5	1	0	0	0	1	tWS
4y4o.cif1	intra	0	408	2A.A.251.	2A.G.194.	2A.C.201.	WC	19-XIX	cWW	cW-W	I	A|G-C	HC	HC	HC	LR	LR	SM	GCGAGCG	ACUGAAA	CAUCUCA				23S Ribosomal RNA	23S Ribosomal RNA	23S Ribosomal RNA	thermus thermophilus	thermus thermophilus	thermus thermophilus	O2'(hydroxyl)-O2'(hydroxyl)[3.35]_N3-N2(amino)[3.03]	N1-O2'(hydroxyl)[2.63]	(1,1)	2	5	19	19	1	0	0	0	1	cSS
4y4o.cif1	intra	180	409	2A.A.271.	2A.G.272.C	2A.C.365.	WC	19-XIX	cWW	cW-W	II	A|G-C	JC	S	S	LC	LC	SM	CUAAACC	GUGGGGC	UACCCGA				23S Ribosomal RNA	23S Ribosomal RNA	23S Ribosomal RNA	thermus thermophilus	thermus thermophilus	thermus thermophilus		O2'(hydroxyl)-O2'(hydroxyl)[2.59]_N3-O2'(hydroxyl)[2.69]	(2,2)	3	4	3	3	0	0	0	0	0	tW.
4y4o.cif1	intra	180	409	2A.A.271.A	2A.G.272.D	2A.C.364.	WC	19-XIX	cWW	cW-W	I	A|G-C	JC	S	S	LC	LC	SM	UAAACCG	UGGGGCC	GUACCCG				23S Ribosomal RNA	23S Ribosomal RNA	23S Ribosomal RNA	thermus thermophilus	thermus thermophilus	thermus thermophilus	N1-O2'(hydroxyl)[2.41]_N3-N2(amino)[3.25]	O3'-O2'(hydroxyl)[3.01]_O2'(hydroxyl)-O2'(hydroxyl)[2.63]_O2'(hydroxyl)-O2(carbonyl)[2.80]	(2,2)	3	4	3	3	0	0	0	0	0	tSS
4y4o.cif1	intra	0	410	2A.A.283.	2A.G.266.	2A.C.426.	WC	19-XIX	cWW	cW-W	X	A|G-C	IC	S	S	LR	LR	SM	CGAAUCC	CCAGCCU	AGGCUAA	abAcdeDfgFEChBHiGI	1,2,3,4,5,6,7,8,-7,-6,-5,-4,-3,-2,-1,9,10,11,12,13,14,-13,15,16,17,18,19,20,21,22,23,-22,-21,-20,-19,-18,-17,-16,-15,-14,-12,-11,-10,-9,24,25,26,27,28,29,30,-8,-30,-29,-28,-27,-26,-25,-24,31,32,33,34,35,36,-23,-36,-35,-34,-33,-32,-31	6	23S Ribosomal RNA	23S Ribosomal RNA	23S Ribosomal RNA	thermus thermophilus	thermus thermophilus	thermus thermophilus	N6(amino)-O2'(hydroxyl)[3.34]_N6(amino)-N3[2.95]_N1-N2(amino)[2.86]		(1,1)	3	3	3	3	0	0	0	0	0	tWS
4y4o.cif1	intra	181	411	2A.A.294.	2A.G.80.	2A.C.106.	WC	19-XIX	cWW	cW-W	I	A|G-C	IC	S	S	LR	LR	SM	CCUAGCC	CAGGGGG	AUCCCUG	abAcBC	1,2,3,-1,4,5,-3,-2,-5,-4	4	23S Ribosomal RNA	23S Ribosomal RNA	23S Ribosomal RNA	thermus thermophilus	thermus thermophilus	thermus thermophilus	N1-O2'(hydroxyl)[2.63]_N3-N2(amino)[3.17]	O2'(hydroxyl)-O2'(hydroxyl)[2.36]_O2'(hydroxyl)-O2(carbonyl)[3.12]	(2,2)	4	1	6	6	0	0	0	0	0	tSS
4y4o.cif1	intra	182	412	2A.A.299.	2A.C.319.	2A.G.323.	WC	19-XIX	cWW	cW-W	II	A|C-G	JI	HP	HP	LR	LR	SM	CCGAAGC	CGCCAGA	AGAGAGG				23S Ribosomal RNA	23S Ribosomal RNA	23S Ribosomal RNA	thermus thermophilus	thermus thermophilus	thermus thermophilus	O2'(hydroxyl)-O2'(hydroxyl)[2.55]_N3-O2'(hydroxyl)[2.84]		(2,2)	4	3	6	6	0	0	0	0	0
4y4o.cif1	intra	182	412	2A.A.300.	2A.C.318.	2A.G.333.	WC	19-XIX	cWW	cW-W	I	A|C-G	JI	S	S	LC	LC	SM	CGAAGCU	GCGCCAG	AAAGCCC	abAB	1,2,-1,-2	1	23S Ribosomal RNA	23S Ribosomal RNA	23S Ribosomal RNA	thermus thermophilus	thermus thermophilus	thermus thermophilus	O2'(hydroxyl)-O2'(hydroxyl)[2.89]_O2'(hydroxyl)-O2(carbonyl)[2.50]	N1-O2'(hydroxyl)[2.53]_N3-N2(amino)[2.65]	(2,2)	4	3	2	2	0	0	0	0	0		tSS
4y4o.cif1	intra	181	411	2A.A.346.	2A.G.79.	2A.C.107.	WC	19-XIX	cWW	cW-W	X	A|G-C	IC	S	S	LR	LR	SM	CGAAAGG	CCAGGGG	UCCCUGG	abAcBC	1,2,3,-1,4,5,-3,-2,-5,-4	4	23S Ribosomal RNA	23S Ribosomal RNA	23S Ribosomal RNA	thermus thermophilus	thermus thermophilus	thermus thermophilus	N1-N2(amino)[2.75]_N3-O2'(hydroxyl)[2.45]		(2,2)	4	3	6	6	1	0	0	0	1	cWS
4y4o.cif1	intra	0	413	2A.A.390.	2A.C.385.	2A.G.411.	WC	19-XIX	cWW	cW-W	I	A|C-G	HC	HC	HP	SM	LR	LR	UGGAGCC	GUUCGUG	GCGGACC				23S Ribosomal RNA	23S Ribosomal RNA	23S Ribosomal RNA	thermus thermophilus	thermus thermophilus	thermus thermophilus	N1-O2'(hydroxyl)[2.95]	N3-N2(amino)[3.26]	(1,1)	2	7	7	2	0	0	0	0	0
4y4o.cif1	intra	177	402	2A.A.432.	2A.C.183.	2A.G.214.	WC	19-XIX	cWW	cW-W	II	A|C-G	JCJP	JC	JC	SM	SM	SM	AGUACUC	GAACCUG	AGAGGAG				23S Ribosomal RNA	23S Ribosomal RNA	23S Ribosomal RNA	thermus thermophilus	thermus thermophilus	thermus thermophilus	O2'(hydroxyl)-O3'[3.26]_O2'(hydroxyl)-O2'(hydroxyl)[2.96]_N3-O2'(hydroxyl)[2.73]		(2,2)	5	6	4	11	0	1	0	0	1	cSS
4y4o.cif1	intra	0	414	2A.A.443.	2A.C.1200.	2A.G.1245.	WC	19-XIX	cWW	cW-W	I	A|C-G	BCJP	S	S	LR	LR	SM	GUGACCG	GUUCCCG	AGGGAAG				23S Ribosomal RNA	23S Ribosomal RNA	23S Ribosomal RNA	thermus thermophilus	thermus thermophilus	thermus thermophilus	O2'(hydroxyl)-O2'(hydroxyl)[2.82]_O2'(hydroxyl)-O2(carbonyl)[2.99]	N1-O2'(hydroxyl)[3.13]_N3-N2(amino)[3.03]	(1,1)	3	1	5	5	1	0	1	0	1		tSS
4y4o.cif1	intra	0	415	2A.A.449.	2A.G.35.	2A.C.445.	WC	19-XIX	cWW	cW-W	II	A|G-C	JCJP	S	S	LC	LC	SM	GAUAGCG	CUCGGCA	GACCGAU	abAcdeDfgFEChBHiGI	1,2,3,4,5,6,7,8,-7,-6,-5,-4,-3,-2,-1,9,10,11,12,13,14,-13,15,16,17,18,19,20,21,22,23,-22,-21,-20,-19,-18,-17,-16,-15,-14,-12,-11,-10,-9,24,25,26,27,28,29,30,-8,-30,-29,-28,-27,-26,-25,-24,31,32,33,34,35,36,-23,-36,-35,-34,-33,-32,-31	3	23S Ribosomal RNA	23S Ribosomal RNA	23S Ribosomal RNA	thermus thermophilus	thermus thermophilus	thermus thermophilus		O2'(hydroxyl)-O2'(hydroxyl)[2.66]_N3-O2'(hydroxyl)[2.76]	(1,1)	3	15	2	2	0	0	0	0	0		cWS
4y4o.cif1	intra	0	416	2A.A.466.	2A.G.682.	2A.C.795.	WC	19-XIX	cWW	cW-W	I	A|G-C	HC	S	S	LR	LR	SM	GUGAGGG	CGGGCGA	GAGCCCG				23S Ribosomal RNA	23S Ribosomal RNA	23S Ribosomal RNA	thermus thermophilus	thermus thermophilus	thermus thermophilus	N3-N2(amino)[3.28]	N1-O2'(hydroxyl)[2.76]	(1,1)	3	4	6	6	1	0	0	0	1	cSS	tWS
4y4o.cif1	intra	183	417	2A.A.514.	2A.C.581.	2A.G.1259.	WC	19-XIX	cWW	cW-W	II	A|C-G	JCJP	S	S	LC	LC	SM	UGAAACC	AGCCGGC	GCCGGCA				23S Ribosomal RNA	23S Ribosomal RNA	23S Ribosomal RNA	thermus thermophilus	thermus thermophilus	thermus thermophilus	O2'(hydroxyl)-O3'[3.35]_O2'(hydroxyl)-O2'(hydroxyl)[2.93]_N3-O2'(hydroxyl)[2.50]		(2,2)	3	19	6	6	1	0	0	0	1	cSS
4y4o.cif1	intra	183	417	2A.A.515.	2A.C.580.	2A.G.1260.	WC	19-XIX	cWW	cW-W	I	A|C-G	JCJP	S	S	LC	LC	SM	GAAACCG	GAGCCGG	CCGGCAU				23S Ribosomal RNA	23S Ribosomal RNA	23S Ribosomal RNA	thermus thermophilus	thermus thermophilus	thermus thermophilus	O2'(hydroxyl)-O2'(hydroxyl)[2.83]_O2'(hydroxyl)-O2(carbonyl)[2.94]	N1-O2'(hydroxyl)[2.76]_N3-N2(amino)[2.97]	(2,2)	3	19	6	6	1	0	0	0	1		tSS
4y4o.cif1	intra	173	396	2A.A.526.	2A.C.2043.	2A.G.2625.	WC	19-XIX	cWW	cW-W	I	A|C-G	JP	S	S	LC	LC	SM	CUUACAA	CUACCCG	CGGGCGC	abAcdeDfgFEChBHiGI	1,2,3,4,5,6,7,8,-7,-6,-5,-4,-3,-2,-1,9,10,11,12,13,14,-13,15,16,17,18,19,20,21,22,23,-22,-21,-20,-19,-18,-17,-16,-15,-14,-12,-11,-10,-9,24,25,26,27,28,29,30,-8,-30,-29,-28,-27,-26,-25,-24,31,32,33,34,35,36,-23,-36,-35,-34,-33,-32,-31	24	23S Ribosomal RNA	23S Ribosomal RNA	23S Ribosomal RNA	thermus thermophilus	thermus thermophilus	thermus thermophilus	O3'-O2'(hydroxyl)[2.89]_O2'(hydroxyl)-O2'(hydroxyl)[2.75]_O2'(hydroxyl)-O2(carbonyl)[2.33]	N1-O2'(hydroxyl)[2.67]_N3-N2(amino)[2.95]	(2,2)	4	7	8	8	0	0	1	0	1		t.S
4y4o.cif1	intra	184	418	2A.A.532.	2A.A.2019.	2A.G.2035.	IM	08-VIII	cWW	cW-W	X	A|A-G	JP	JP	HC	SM	LR	LR	AGCAGUC	UUGAACU	GAUGCGG				23S Ribosomal RNA	23S Ribosomal RNA	23S Ribosomal RNA	thermus thermophilus	thermus thermophilus	thermus thermophilus		N1-N2(amino)[2.90]	(1,2)	3	7	11	8	0	1	0	0	1		cWW
4y4o.cif1	intra	184	418	2A.A.532.	2A.A.2020.	2A.U.2034.	WC	20-XX	cWW	cW-W	X	A|A-U	JP	JP	HC	SM	LR	LR	AGCAGUC	UGAACUG	AGAUGCG				23S Ribosomal RNA	23S Ribosomal RNA	23S Ribosomal RNA	thermus thermophilus	thermus thermophilus	thermus thermophilus	N6(amino)-N3[2.95]		(1,2)	3	7	11	8	0	1	0	0	1	cWS
4y4o.cif1	intra	0	419	2A.A.571.	2A.A.567.	2A.A.2030.	NA	n/a	cWW	cW-W	X	A|A-A	JP	JP	HC	SM	LR	LR	UUGAAGC	CCUAUUG	GUGAAGA				23S Ribosomal RNA	23S Ribosomal RNA	23S Ribosomal RNA	thermus thermophilus	thermus thermophilus	thermus thermophilus	OP2-N6(amino)[3.15]	O5'-N6(amino)[3.18]	(1,1)	2	18	18	8	0	0	0	0	0	tHW
4y4o.cif1	intra	185	420	2A.A.586.	2A.C.671.	2A.G.809.	WC	19-XIX	cWW	cW-W	I	A|C-G	JC	S	S	LC	LC	SM	GCGACUC	GGACCCG	CUGGUUC				23S Ribosomal RNA	23S Ribosomal RNA	23S Ribosomal RNA	thermus thermophilus	thermus thermophilus	thermus thermophilus	O2'(hydroxyl)-O2'(hydroxyl)[2.63]_O2'(hydroxyl)-O2(carbonyl)[2.85]	N1-O2'(hydroxyl)[2.49]_N3-N2(amino)[3.25]	(2,2)	4	4	2	2	1	0	0	0	1		tSS
4y4o.cif1	intra	186	421	2A.A.608.	2A.C.237.	2A.G.260.	WC	19-XIX	cWW	cW-W	X	A|C-G	IC	S	S	LR	LR	SM	CUUAAGC	CUCCCUG	AGGGGAC				23S Ribosomal RNA	23S Ribosomal RNA	23S Ribosomal RNA	thermus thermophilus	thermus thermophilus	thermus thermophilus		N6(amino)-O2'(hydroxyl)[3.12]_N1-O2'(hydroxyl)[2.93]	(3,2)	4	3	5	5	0	0	0	0	0
4y4o.cif1	intra	186	421	2A.A.608.	2A.C.238.	2A.G.259.	WC	19-XIX	cWW	cW-W	X	A|C-G	IC	S	S	LR	LR	SM	CUUAAGC	UCCCUGA	AAGGGGA				23S Ribosomal RNA	23S Ribosomal RNA	23S Ribosomal RNA	thermus thermophilus	thermus thermophilus	thermus thermophilus	O2'(hydroxyl)-O3'[3.23]_O2'(hydroxyl)-O2'(hydroxyl)[2.77]_N3-O2'(hydroxyl)[2.73]		(3,2)	4	3	5	5	0	0	0	0	0
4y4o.cif1	intra	186	421	2A.A.609.	2A.C.237.	2A.G.260.	WC	19-XIX	cWW	cW-W	I	A|C-G	IC	S	S	LR	LR	SM	UUAAGCC	CUCCCUG	AGGGGAC				23S Ribosomal RNA	23S Ribosomal RNA	23S Ribosomal RNA	thermus thermophilus	thermus thermophilus	thermus thermophilus	O2'(hydroxyl)-O2'(hydroxyl)[2.79]_O2'(hydroxyl)-O2(carbonyl)[2.88]	N3-N2(amino)[3.25]	(3,2)	4	3	5	5	0	0	0	0	0		tSS
4y4o.cif1	intra	186	421	2A.A.621.	2A.C.238.	2A.G.259.	WC	19-XIX	cWW	cW-W	I	A|C-G	IC	S	S	LR	LR	SM	CGGAGGC	UCCCUGA	AAGGGGA				23S Ribosomal RNA	23S Ribosomal RNA	23S Ribosomal RNA	thermus thermophilus	thermus thermophilus	thermus thermophilus		O2'(hydroxyl)-O2'(hydroxyl)[2.57]_O2'(hydroxyl)-N3[2.94]_N3-N2(amino)[3.28]	(3,2)	4	3	5	5	0	0	0	0	0		cSS
4y4o.cif1	intra	0	422	2A.A.631.	2A.U.2401.	2A.G.2415.	WB	28-XXVIII	cWW	cW-W	X	A|U-G	HC	S	S	LR	LR	SM	GGGAAAC	UGGUCCC	AGGGCCA	abAcdeDfgFEChBHiGI	1,2,3,4,5,6,7,8,-7,-6,-5,-4,-3,-2,-1,9,10,11,12,13,14,-13,15,16,17,18,19,20,21,22,23,-22,-21,-20,-19,-18,-17,-16,-15,-14,-12,-11,-10,-9,24,25,26,27,28,29,30,-8,-30,-29,-28,-27,-26,-25,-24,31,32,33,34,35,36,-23,-36,-35,-34,-33,-32,-31	29	23S Ribosomal RNA	23S Ribosomal RNA	23S Ribosomal RNA	thermus thermophilus	thermus thermophilus	thermus thermophilus		N1-N2(amino)[2.78]_N3-O2'(hydroxyl)[2.62]	(1,1)	3	4	7	7	1	0	0	0	1		cWS
4y4o.cif1	intra	187	423	2A.A.643.	2A.U.2348.	2A.A.2369.	WC	20-XX	cWW	cW-W	X	A|U-A	HC	S	S	LR	LR	SM	CCGAACA	GACUGCG	AGCAGGG				23S Ribosomal RNA	23S Ribosomal RNA	23S Ribosomal RNA	thermus thermophilus	thermus thermophilus	thermus thermophilus		N6(amino)-N3[2.93]_N1-O2'(hydroxyl)[2.52]	(3,2)	3	5	4	4	0	1	0	0	1		cWS
4y4o.cif1	intra	187	423	2A.A.644.	2A.G.2349.	2A.C.2368.	WC	19-XIX	cWW	cW-W	X	A|G-C	HC	S	S	LR	LR	SM	CGAACAG	ACUGCGA	GAGCAGG				23S Ribosomal RNA	23S Ribosomal RNA	23S Ribosomal RNA	thermus thermophilus	thermus thermophilus	thermus thermophilus	N6(amino)-O2'(hydroxyl)[2.89]_N6(amino)-N3[3.19]_N1-N2(amino)[3.31]		(3,2)	3	5	4	4	0	1	0	0	1	tWS
4y4o.cif1	intra	187	423	2A.A.646.	2A.G.2349.	2A.C.2368.	WC	19-XIX	cWW	cW-W	I	A|G-C	HC	S	S	LR	LR	SM	AACAGGG	ACUGCGA	GAGCAGG				23S Ribosomal RNA	23S Ribosomal RNA	23S Ribosomal RNA	thermus thermophilus	thermus thermophilus	thermus thermophilus		O2'(hydroxyl)-O2'(hydroxyl)[3.45]	(3,2)	3	5	4	4	0	1	0	0	1
4y4o.cif1	intra	188	424	2A.A.675.	2A.G.2067.	2A.C.2443.	WC	19-XIX	cWW	cW-W	II	A|G-C	IC	S	S	LR	LR	SM	CCGAAAC	CCCGUGG	CCCCGGG	abAcdeDfgFEChBHiGI	1,2,3,4,5,6,7,8,-7,-6,-5,-4,-3,-2,-1,9,10,11,12,13,14,-13,15,16,17,18,19,20,21,22,23,-22,-21,-20,-19,-18,-17,-16,-15,-14,-12,-11,-10,-9,24,25,26,27,28,29,30,-8,-30,-29,-28,-27,-26,-25,-24,31,32,33,34,35,36,-23,-36,-35,-34,-33,-32,-31	26	23S Ribosomal RNA	23S Ribosomal RNA	23S Ribosomal RNA	thermus thermophilus	thermus thermophilus	thermus thermophilus		O2'(hydroxyl)-O2'(hydroxyl)[2.75]_N3-O2'(hydroxyl)[2.72]	(2,2)	5	5	4	4	1	0	0	0	1		cWS
4y4o.cif1	intra	188	424	2A.A.676.	2A.G.2069.	2A.C.2442.	WC	19-XIX	cWW	cW-W	I	A|G-C	IC	S	S	LR	LR	SM	CGAAACC	CGUGGAG	ACCCCGG	abAcdeDfgFEChBHiGI	1,2,3,4,5,6,7,8,-7,-6,-5,-4,-3,-2,-1,9,10,11,12,13,14,-13,15,16,17,18,19,20,21,22,23,-22,-21,-20,-19,-18,-17,-16,-15,-14,-12,-11,-10,-9,24,25,26,27,28,29,30,-8,-30,-29,-28,-27,-26,-25,-24,31,32,33,34,35,36,-23,-36,-35,-34,-33,-32,-31	27	23S Ribosomal RNA	23S Ribosomal RNA	23S Ribosomal RNA	thermus thermophilus	thermus thermophilus	thermus thermophilus	N1-O2'(hydroxyl)[2.66]_N3-N2(amino)[3.02]	O2'(hydroxyl)-O2'(hydroxyl)[2.74]_O2'(hydroxyl)-O2(carbonyl)[3.17]	(2,2)	5	5	2	2	1	0	0	0	1	tSS
4y4o.cif1	intra	0	425	2A.A.685.	2A.G.778.	2A.C.786.	WC	19-XIX	cWW	cW-W	X	A|G-C	JC	S	S	LC	LC	SM	GCGAGCU	GGAGUGA	AAGCUAA				23S Ribosomal RNA	23S Ribosomal RNA	23S Ribosomal RNA	thermus thermophilus	thermus thermophilus	thermus thermophilus	N6(amino)-O2'(hydroxyl)[3.24]_N6(amino)-N3[3.02]_N1-N2(amino)[3.01]		(1,1)	3	5	3	3	1	0	0	0	1	tWS
4y4o.cif1	intra	0	426	2A.A.781.	2A.G.1776.	2A.C.1788.	WC	19-XIX	cWW	cW-W	I	A|G-C	HC	S	S	LR	LR	SM	GUGAAAA	ACUGUUU	AAACACA				23S Ribosomal RNA	23S Ribosomal RNA	23S Ribosomal RNA	thermus thermophilus	thermus thermophilus	thermus thermophilus	N1-O2'(hydroxyl)[2.58]_N3-N2(amino)[2.91]	O3'-O2'(hydroxyl)[3.32]_O2'(hydroxyl)-O2'(hydroxyl)[2.74]_O2'(hydroxyl)-O2(carbonyl)[2.51]	(1,1)	3	5	2	2	1	0	0	0	1	tWS
4y4o.cif1	intra	0	427	2A.A.819.	2A.C.837.	2A.G.942.	WC	19-XIX	cWW	cW-W	I	A|C-G	JC	S	S	LC	LC	SM	CCGAAAU	CAGCCUC	GGAGUGA				23S Ribosomal RNA	23S Ribosomal RNA	23S Ribosomal RNA	thermus thermophilus	thermus thermophilus	thermus thermophilus	O3'-O2'(hydroxyl)[2.86]_O2'(hydroxyl)-O2'(hydroxyl)[2.86]	N3-N2(amino)[2.96]	(1,1)	3	4	2	2	1	0	0	0	1		tSS
4y4o.cif1	inter	189	428	2A.A.861.	2B.C.79.	2B.G.98.	WC	19-XIX	cWW	cW-W	X	A|C-G	IC	S	S	LR	LR	SM	UGUAGAG	GUACUGG	CUGGGAG				23S Ribosomal RNA	5S Ribosomal RNA	5S Ribosomal RNA	thermus thermophilus	thermus thermophilus	thermus thermophilus	O2'(hydroxyl)-O3'[2.81]_O2'(hydroxyl)-O2'(hydroxyl)[2.91]_N3-O2'(hydroxyl)[2.55]		(2,2)	5	4	8	8	0	0	0	0	0
4y4o.cif1	intra	0	429	2A.A.866.	2A.G.864.	2A.C.912.	WC	19-XIX	cWW	cW-W	X	A|G-C	IC	S	S	LC	LC	SM	AGCACUG	AGAGCAC	AAACUCC				23S Ribosomal RNA	23S Ribosomal RNA	23S Ribosomal RNA	thermus thermophilus	thermus thermophilus	thermus thermophilus	N6(amino)-O2'(hydroxyl)[3.25]_N6(amino)-N3[2.81]_N1-N2(amino)[3.05]		(1,1)	3	3	2	2	0	1	0	0	1	tWS
4y4o.cif1	intra	190	430	2A.A.878.	2A.U.877.	2A.A.899.	WC	20-XX	cWW	cW-W	X	A|U-A	IC	IC	IC	SM	SM	SM	GCUAGGG	GGCUAGG	ACCAAAC				23S Ribosomal RNA	23S Ribosomal RNA	23S Ribosomal RNA	thermus thermophilus	thermus thermophilus	thermus thermophilus		N6(amino)-O2'(hydroxyl)[2.56]_N1*N3[3.18]	(2,1)	2	3	3	3	0	0	0	0	0		tWS
4y4o.cif1	intra	190	430	2A.A.900.	2A.U.877.	2A.A.899.	WC	20-XX	cWW	cW-W	X	A|U-A	IC	IC	IC	SM	SM	SM	CCAAACC	GGCUAGG	ACCAAAC				23S Ribosomal RNA	23S Ribosomal RNA	23S Ribosomal RNA	thermus thermophilus	thermus thermophilus	thermus thermophilus	N6(amino)-O2'(hydroxyl)[2.89]_N6(amino)-O2(carbonyl)[2.76]		(2,1)	2	3	3	3	0	0	0	0	0	tH.
4y4o.cif1	intra	191	431	2A.A.910.	2A.C.2264.	2A.G.2276.	WC	19-XIX	cWW	cW-W	II	A|C-G	IC	S	S	LR	LR	SM	UCAAACU	CUCCUAA	AACGGAG				23S Ribosomal RNA	23S Ribosomal RNA	23S Ribosomal RNA	thermus thermophilus	thermus thermophilus	thermus thermophilus	O2'(hydroxyl)-O3'[3.04]_O2'(hydroxyl)-O2'(hydroxyl)[2.64]_N3-O2'(hydroxyl)[2.60]	N1-N2(amino)[3.31]	(2,2)	3	2	6	6	0	0	0	0	0		tW.
4y4o.cif1	intra	191	431	2A.A.911.	2A.C.2263.	2A.G.2277.	WC	19-XIX	cWW	cW-W	I	A|C-G	IC	S	S	LR	LR	SM	CAAACUC	CCUCCUA	ACGGAGG				23S Ribosomal RNA	23S Ribosomal RNA	23S Ribosomal RNA	thermus thermophilus	thermus thermophilus	thermus thermophilus	O2'(hydroxyl)-O2'(hydroxyl)[2.94]	N1-O2'(hydroxyl)[2.75]_N3-N2(amino)[3.44]	(2,2)	3	2	6	6	0	0	0	0	0		tSS
4y4o.cif1	intra	192	432	2A.A.959.	2A.U.2457.	2A.G.2494.	WB	28-XXVIII	cWW	cW-W	II	A|U-G	HC	S	S	LR	LR	SM	GAUAACG	GGCUGAU	UUUGGCA				23S Ribosomal RNA	23S Ribosomal RNA	23S Ribosomal RNA	thermus thermophilus	thermus thermophilus	thermus thermophilus	O2'(hydroxyl)-O3'[2.93]_O2'(hydroxyl)-O2'(hydroxyl)[2.85]_N3-O2'(hydroxyl)[2.69]		(3,3)	4	6	3	3	0	0	1	0	1
4y4o.cif1	intra	192	432	2A.A.960.	2A.C.2456.	2A.G.2495.	WC	19-XIX	cWW	cW-W	I	A|C-G	HC	S	S	LR	LR	SM	AUAACGU	AGGCUGA	UUGGCAC				23S Ribosomal RNA	23S Ribosomal RNA	23S Ribosomal RNA	thermus thermophilus	thermus thermophilus	thermus thermophilus	O2'(hydroxyl)-O2'(hydroxyl)[2.66]_O2'(hydroxyl)-O2(carbonyl)[3.25]	N1-O2'(hydroxyl)[2.80]_N3-N2(amino)[2.92]	(3,3)	4	6	3	3	0	0	1	0	1		tSS
4y4o.cif1	intra	193	433	2A.A.980.	2A.C.2026.	2A.G.2037.	WC	19-XIX	cWW	cW-W	II	A|C-G	HC	S	S	LR	LR	SM	GGGAACA	GGCCGUG	UGCGGCC				23S Ribosomal RNA	23S Ribosomal RNA	23S Ribosomal RNA	thermus thermophilus	thermus thermophilus	thermus thermophilus		O2'(hydroxyl)-O2'(hydroxyl)[2.99]_N1-N2(amino)[2.82]_N3-O2'(hydroxyl)[2.65]	(2,2)	3	6	5	5	1	1	0	0	1		cWS
4y4o.cif1	intra	193	433	2A.A.981.	2A.G.2027.	2A.C.2036.	WC	19-XIX	cWW	cW-W	I	A|G-C	HC	S	S	LR	LR	SM	GGAACAA	GCCGUGA	AUGCGGC				23S Ribosomal RNA	23S Ribosomal RNA	23S Ribosomal RNA	thermus thermophilus	thermus thermophilus	thermus thermophilus	N1-O2'(hydroxyl)[2.61]_N3-N2(amino)[3.12]	O2'(hydroxyl)-O2'(hydroxyl)[2.54]_O2'(hydroxyl)-O2(carbonyl)[3.16]	(2,2)	3	6	5	5	1	1	0	0	1	tSS
4y4o.cif1	intra	194	434	2A.A.983.	2A.G.946.	2A.C.971.	WC	19-XIX	cWW	cW-W	II	A|G-C	HC	S	S	LR	LR	SM	AACAACC	UGAGGGC	GUCCGAG				23S Ribosomal RNA	23S Ribosomal RNA	23S Ribosomal RNA	thermus thermophilus	thermus thermophilus	thermus thermophilus		N3-O2'(hydroxyl)[2.67]	(2,2)	3	6	7	7	0	1	0	0	1		cSS
4y4o.cif1	intra	194	434	2A.A.984.	2A.G.947.	2A.C.970.	WC	19-XIX	cWW	cW-W	I	A|G-C	HC	S	S	LR	LR	SM	ACAACCG	GAGGGCG	CGUCCGA				23S Ribosomal RNA	23S Ribosomal RNA	23S Ribosomal RNA	thermus thermophilus	thermus thermophilus	thermus thermophilus	N1-O2'(hydroxyl)[2.51]_N3-N2(amino)[2.92]	O2'(hydroxyl)-O2'(hydroxyl)[2.48]_O2'(hydroxyl)-O2(carbonyl)[2.88]	(2,2)	3	6	7	7	0	0	0	0	0	tSS
4y4o.cif1	intra	195	435	2A.A.1000.	2A.C.976.	2A.G.987.	WC	19-XIX	cWW	cW-W	X	A|C-G	IC	S	S	LR	LR	SM	GCUAAGG	GCGCGGG	ACCGAGA				23S Ribosomal RNA	23S Ribosomal RNA	23S Ribosomal RNA	thermus thermophilus	thermus thermophilus	thermus thermophilus		O2'(hydroxyl)-O3'[3.02]_O2'(hydroxyl)-O2'(hydroxyl)[2.92]_N3-O2'(hydroxyl)[2.45]	(5,4)	7	3	3	3	0	0	0	0	0
4y4o.cif1	intra	195	435	2A.A.1000.	2A.G.977.	2A.C.986.	WC	19-XIX	cWW	cW-W	X	A|G-C	IC	S	S	LR	LR	SM	GCUAAGG	CGCGGGA	AACCGAG				23S Ribosomal RNA	23S Ribosomal RNA	23S Ribosomal RNA	thermus thermophilus	thermus thermophilus	thermus thermophilus	N6(amino)-O2'(hydroxyl)[3.47]		(5,4)	7	3	3	3	0	0	0	0	0
4y4o.cif1	intra	195	435	2A.A.1001.	2A.G.977.	2A.C.986.	WC	19-XIX	cWW	cW-W	I	A|G-C	IC	S	S	LR	LR	SM	CUAAGGC	CGCGGGA	AACCGAG				23S Ribosomal RNA	23S Ribosomal RNA	23S Ribosomal RNA	thermus thermophilus	thermus thermophilus	thermus thermophilus	N1-O2'(hydroxyl)[2.76]_N3-N2(amino)[2.97]	O2'(hydroxyl)-O2'(hydroxyl)[2.52]	(5,4)	7	3	3	3	0	0	0	0	0	tSS
4y4o.cif1	intra	195	435	2A.A.1009.	2A.G.1002.	2A.C.1153.	WC	19-XIX	cWW	cW-W	II	A|G-C	IP	S	S	LR	LR	SM	CCCAAGU	UAAGGCC	CGCCGAA				23S Ribosomal RNA	23S Ribosomal RNA	23S Ribosomal RNA	thermus thermophilus	thermus thermophilus	thermus thermophilus		O2'(hydroxyl)-O3'[3.23]_O2'(hydroxyl)-O2'(hydroxyl)[2.81]_N3-O2'(hydroxyl)[2.71]	(5,4)	7	5	3	3	0	0	0	0	0
4y4o.cif1	intra	195	435	2A.A.1010.	2A.G.1003.	2A.C.1152.	WC	19-XIX	cWW	cW-W	I	A|G-C	IP	S	S	LR	LR	SM	CCAAGUC	AAGGCCC	GCGCCGA				23S Ribosomal RNA	23S Ribosomal RNA	23S Ribosomal RNA	thermus thermophilus	thermus thermophilus	thermus thermophilus	N1-O2'(hydroxyl)[2.56]_N3-N2(amino)[2.66]	O2'(hydroxyl)-O2'(hydroxyl)[2.69]_O2'(hydroxyl)-O2(carbonyl)[3.04]	(5,4)	7	5	3	3	0	0	0	0	0	tSS
4y4o.cif1	intra	196	436	2A.A.1028.	2A.C.2464.	2A.G.2486.	WC	19-XIX	cWW	cW-W	II	A|C-G	IP	S	S	LR	LR	SM	GUAAAGG	CUCCCCC	CGGGGAG				23S Ribosomal RNA	23S Ribosomal RNA	23S Ribosomal RNA	thermus thermophilus	thermus thermophilus	thermus thermophilus		O2'(hydroxyl)-O3'[2.96]_O2'(hydroxyl)-O2'(hydroxyl)[2.67]_N3-O2'(hydroxyl)[2.62]	(3,4)	4	11	6	6	1	0	0	0	1		cWS
4y4o.cif1	intra	196	436	2A.A.1029.	2A.C.2465.	2A.G.2485.	WC	19-XIX	cWW	cW-W	I	A|C-G	IP	S	S	LR	LR	SM	UAAAGGA	UCCCCCG	GCGGGGA				23S Ribosomal RNA	23S Ribosomal RNA	23S Ribosomal RNA	thermus thermophilus	thermus thermophilus	thermus thermophilus	N1-O2'(hydroxyl)[2.75]	N3-N2(amino)[3.16]	(3,4)	4	11	6	6	0	0	0	0	0	tWS	cSS
4y4o.cif1	intra	0	437	2A.A.1048.	2A.C.1043.	2A.G.1112.	WC	19-XIX	cWW	cW-W	I	A|C-G	IC	IC	IC	SM	SM	SM	AAGACAG	CCGCGAA	CGAGUGG				23S Ribosomal RNA	23S Ribosomal RNA	23S Ribosomal RNA	thermus thermophilus	thermus thermophilus	thermus thermophilus	O2'(hydroxyl)-O2'(hydroxyl)[2.47]	N6(amino)-O2'(hydroxyl)[2.79]_N1-O2'(hydroxyl)[2.59]_N3-N2(amino)[2.92]	(1,1)	2	10	10	6	0	0	0	0	0		tWS
4y4o.cif1	intra	196	436	2A.A.1127.	2A.U.2462.	2A.A.2488.	WC	20-XX	cWW	cW-W	X	A|U-A	IP	S	S	LR	LR	SM	CGAAAAU	AUCUCCC	GGGAGGU				23S Ribosomal RNA	23S Ribosomal RNA	23S Ribosomal RNA	thermus thermophilus	thermus thermophilus	thermus thermophilus		N7-O2'(hydroxyl)[2.71]_N6(amino)-N3[2.92]	(3,4)	4	10	6	6	1	0	0	0	1		cHS
4y4o.cif1	intra	196	436	2A.A.1127.	2A.C.2463.	2A.G.2487.	WC	19-XIX	cWW	cW-W	X	A|C-G	IP	S	S	LR	LR	SM	CGAAAAU	UCUCCCC	GGGGAGG				23S Ribosomal RNA	23S Ribosomal RNA	23S Ribosomal RNA	thermus thermophilus	thermus thermophilus	thermus thermophilus	N6(amino)-O2(carbonyl)[2.99]_N1-O2'(hydroxyl)[2.68]		(3,4)	4	10	6	6	1	0	0	0	1	cWS
4y4o.cif1	intra	197	438	2A.A.1128.	2A.G.2516.	2A.C.2568.	WC	19-XIX	cWW	cW-W	X	A|G-C	IP	S	S	LR	LR	SM	GAAAAUG	GUCGCAU	AAGCGGC				23S Ribosomal RNA	23S Ribosomal RNA	23S Ribosomal RNA	thermus thermophilus	thermus thermophilus	thermus thermophilus	O4'-O2'(hydroxyl)[2.66]_N1-N2(amino)[3.50]_N3-O2'(hydroxyl)[2.86]		(2,2)	3	10	5	5	1	0	0	0	1
4y4o.cif1	intra	197	438	2A.A.1129.	2A.C.2515.	2A.G.2569.	WC	19-XIX	cWW	cW-W	I	A|C-G	IP	S	S	LR	LR	SM	AAAAUGA	CGUCGCA	AGCGGCA				23S Ribosomal RNA	23S Ribosomal RNA	23S Ribosomal RNA	thermus thermophilus	thermus thermophilus	thermus thermophilus	O3'-O2'(hydroxyl)[3.27]_O2'(hydroxyl)-O2'(hydroxyl)[2.81]_O2'(hydroxyl)-O2(carbonyl)[2.76]	N1-O2'(hydroxyl)[2.70]_N3-N2(amino)[2.97]	(2,2)	3	10	5	5	0	0	0	0	0		tSS
4y4o.cif1	intra	0	439	2A.A.1132.	2A.G.2024.	2A.C.2039.	WC	19-XIX	cWW	cW-W	X	A|G-C	IP	S	S	LR	LR	SM	AUGAUCG	CUGGCCG	CGGCCUA				23S Ribosomal RNA	23S Ribosomal RNA	23S Ribosomal RNA	thermus thermophilus	thermus thermophilus	thermus thermophilus		N6(amino)-O2(carbonyl)[2.72]_N1-O2'(hydroxyl)[2.74]	(1,1)	3	10	5	5	0	0	0	0	0		cWS
4y4o.cif1	intra	195	435	2A.A.1155.	2A.C.976.	2A.G.987.	WC	19-XIX	cWW	cW-W	X	A|C-G	IC	S	S	LR	LR	SM	CCGAAGC	GCGCGGG	ACCGAGA				23S Ribosomal RNA	23S Ribosomal RNA	23S Ribosomal RNA	thermus thermophilus	thermus thermophilus	thermus thermophilus	O2'(hydroxyl)-O2'(hydroxyl)[2.65]	N3-N2(amino)[3.34]	(5,4)	7	3	3	3	0	0	0	0	0
4y4o.cif1	intra	0	440	2A.A.1214.	2A.G.30.	2A.C.510.	WC	19-XIX	cWW	cW-W	II	A|G-C	IC	JC	JCJP	LR	LR	SM	UGAAGGC	GAUGCCU	AGCCUGA				23S Ribosomal RNA	23S Ribosomal RNA	23S Ribosomal RNA	thermus thermophilus	thermus thermophilus	thermus thermophilus	O2'(hydroxyl)-O3'[3.28]_O2'(hydroxyl)-O2'(hydroxyl)[2.86]_N3-O2'(hydroxyl)[2.79]		(1,1)	3	6	6	19	0	0	0	0	0
4y4o.cif1	intra	0	441	2A.A.1220.	2A.C.542.	2A.G.551.	WC	19-XIX	cWW	cW-W	X	A|C-G	BC	S	S	LR	LR	SM	CCGACCC	GCCCCGC	AAGGGGU				23S Ribosomal RNA	23S Ribosomal RNA	23S Ribosomal RNA	thermus thermophilus	thermus thermophilus	thermus thermophilus		N1-N2(amino)[2.79]_N3-O2'(hydroxyl)[2.80]	(1,1)	3	1	11	11	0	0	0	0	0		cWS
4y4o.cif1	intra	0	442	2A.A.1226.	2A.C.812.	2A.G.1195.	WC	19-XIX	cWW	cW-W	I	A|C-G	HC	S	S	LR	LR	SM	GCGAGGG	GUUCUCC	GGAGCGU				23S Ribosomal RNA	23S Ribosomal RNA	23S Ribosomal RNA	thermus thermophilus	thermus thermophilus	thermus thermophilus	O2'(hydroxyl)-O2'(hydroxyl)[2.82]	N1-O2'(hydroxyl)[2.48]_N3-N2(amino)[3.04]	(1,1)	3	4	6	6	1	0	0	0	1		tSS
4y4o.cif1	intra	0	443	2A.A.1253.	2A.C.564.	2A.G.577.	WC	19-XIX	cWW	cW-W	I	A|C-G	JC	JP	JP	LR	LR	SM	GCGAAUG	GUGCCUA	CAUGAGC				23S Ribosomal RNA	23S Ribosomal RNA	23S Ribosomal RNA	thermus thermophilus	thermus thermophilus	thermus thermophilus	N1-O2'(hydroxyl)[2.84]	O3'-O2'(hydroxyl)[3.57]_N3-N2(amino)[3.32]	(1,1)	2	8	18	18	1	0	0	0	1		cSS
4y4o.cif1	intra	185	420	2A.A.1254.	2A.C.672.	2A.G.808.	WC	19-XIX	cWW	cW-W	I	A|C-G	JC	S	S	LC	LC	SM	CGAAUGC	GACCCGA	GCUGGUU				23S Ribosomal RNA	23S Ribosomal RNA	23S Ribosomal RNA	thermus thermophilus	thermus thermophilus	thermus thermophilus		O2'(hydroxyl)-O2'(hydroxyl)[2.65]_N3-N2(amino)[3.23]	(2,2)	4	8	2	2	0	0	0	0	0		cSS
4y4o.cif1	intra	198	444	2A.A.1274.	2A.G.1296.	2A.C.1644.	WC	19-XIX	cWW	cW-W	I	A|G-C	JC	S	S	LC	LC	SM	GAUAAAG	CUCGCCG	AGGCGCG	abAcdeDfgFEChBHiGI	1,2,3,4,5,6,7,8,-7,-6,-5,-4,-3,-2,-1,9,10,11,12,13,14,-13,15,16,17,18,19,20,21,22,23,-22,-21,-20,-19,-18,-17,-16,-15,-14,-12,-11,-10,-9,24,25,26,27,28,29,30,-8,-30,-29,-28,-27,-26,-25,-24,31,32,33,34,35,36,-23,-36,-35,-34,-33,-32,-31	10	23S Ribosomal RNA	23S Ribosomal RNA	23S Ribosomal RNA	thermus thermophilus	thermus thermophilus	thermus thermophilus	O2'(hydroxyl)-O2'(hydroxyl)[3.59]_N3-N2(amino)[3.55]	N1-O2'(hydroxyl)[2.56]	(3,3)	4	5	4	4	0	0	0	0	0	cSS	tWS
4y4o.cif1	intra	198	444	2A.A.1275.	2A.C.1295.	2A.G.1645.	WC	19-XIX	cWW	cW-W	I	A|C-G	JC	S	S	LC	LC	SM	AUAAAGA	UCUCGCC	GGCGCGC	abAcdeDfgFEChBHiGI	1,2,3,4,5,6,7,8,-7,-6,-5,-4,-3,-2,-1,9,10,11,12,13,14,-13,15,16,17,18,19,20,21,22,23,-22,-21,-20,-19,-18,-17,-16,-15,-14,-12,-11,-10,-9,24,25,26,27,28,29,30,-8,-30,-29,-28,-27,-26,-25,-24,31,32,33,34,35,36,-23,-36,-35,-34,-33,-32,-31	10	23S Ribosomal RNA	23S Ribosomal RNA	23S Ribosomal RNA	thermus thermophilus	thermus thermophilus	thermus thermophilus	N1-O2'(hydroxyl)[2.53]	O3'-O2'(hydroxyl)[3.50]_O2'(hydroxyl)-N2(amino)[3.12]_O2'(hydroxyl)-N3[2.93]	(3,3)	4	5	4	4	0	0	0	0	0
4y4o.cif1	intra	0	445	2A.A.1287.	2A.C.1648.	2A.G.2009.	WC	19-XIX	cWW	cW-W	X	A|C-G	HC	S	S	LR	LR	SM	AGAAUCC	GCGCGGG	CCCGGUG				23S Ribosomal RNA	23S Ribosomal RNA	23S Ribosomal RNA	thermus thermophilus	thermus thermophilus	thermus thermophilus	N6(amino)-O2(carbonyl)[3.36]_N1-O2'(hydroxyl)[2.71]		(1,1)	3	7	4	4	0	0	0	0	0	tWS
4y4o.cif1	intra	198	444	2A.A.1302.	2A.C.1297.	2A.G.1643.	WC	19-XIX	cWW	cW-W	I	A|C-G	JC	S	S	LC	LC	SM	GUAAGCC	UCGCCGU	CAGGCGC	abAcdeDfgFEChBHiGI	1,2,3,4,5,6,7,8,-7,-6,-5,-4,-3,-2,-1,9,10,11,12,13,14,-13,15,16,17,18,19,20,21,22,23,-22,-21,-20,-19,-18,-17,-16,-15,-14,-12,-11,-10,-9,24,25,26,27,28,29,30,-8,-30,-29,-28,-27,-26,-25,-24,31,32,33,34,35,36,-23,-36,-35,-34,-33,-32,-31	10	23S Ribosomal RNA	23S Ribosomal RNA	23S Ribosomal RNA	thermus thermophilus	thermus thermophilus	thermus thermophilus	N1-O2'(hydroxyl)[2.71]	N3-N2(amino)[3.51]	(3,3)	4	4	4	4	1	0	0	0	1	tWS	cSS
4y4o.cif1	intra	0	446	2A.A.1322.	2A.G.1319.	2A.C.1333.	WC	19-XIX	cWW	cW-W	X	A|G-C	IC	S	S	LC	LC	SM	GCAAUGG	UACGCAA	CAGCGUA				23S Ribosomal RNA	23S Ribosomal RNA	23S Ribosomal RNA	thermus thermophilus	thermus thermophilus	thermus thermophilus		N6(amino)-O2(carbonyl)[3.16]_N1-O2'(hydroxyl)[2.49]	(1,1)	3	3	6	6	1	0	0	0	1		cWS
4y4o.cif1	intra	199	447	2A.A.1353.	2A.C.693.	2A.G.769.	WC	19-XIX	cWW	cW-W	II	A|C-G	IC	S	S	LR	LR	SM	CCUAAGG	GCCCUGG	CUGGGGC				23S Ribosomal RNA	23S Ribosomal RNA	23S Ribosomal RNA	thermus thermophilus	thermus thermophilus	thermus thermophilus	O2'(hydroxyl)-O2'(hydroxyl)[2.55]_N3-O2'(hydroxyl)[2.81]		(3,3)	4	3	9	9	0	0	0	0	0	cSS
4y4o.cif1	intra	199	447	2A.A.1354.	2A.C.692.	2A.G.770.	WC	19-XIX	cWW	cW-W	I	A|C-G	IC	S	S	LR	LR	SM	CUAAGGU	AGCCCUG	UGGGGCU				23S Ribosomal RNA	23S Ribosomal RNA	23S Ribosomal RNA	thermus thermophilus	thermus thermophilus	thermus thermophilus	O2'(hydroxyl)-O2'(hydroxyl)[2.39]_O2'(hydroxyl)-O2(carbonyl)[3.09]	N1-O2'(hydroxyl)[2.65]_N3-N2(amino)[2.96]	(3,3)	4	3	9	9	0	0	0	0	0		tSS
4y4o.cif1	intra	0	448	2A.A.1365.	2A.G.187.	2A.C.209.	WC	19-XIX	cWW	cW-W	X	A|G-C	HC	S	S	LR	LR	SM	CCGAAAG	CUGGGGA	UACCCAG				23S Ribosomal RNA	23S Ribosomal RNA	23S Ribosomal RNA	thermus thermophilus	thermus thermophilus	thermus thermophilus	N1-N2(amino)[2.86]_N3-O2'(hydroxyl)[2.61]		(1,1)	3	4	5	5	1	0	0	0	1	cWS
4y4o.cif1	intra	199	447	2A.A.1379.	2A.U.694.	2A.G.768.	WB	28-XXVIII	cWW	cW-W	I	A|U-G	IC	S	S	LR	LR	SM	CGAAGGG	CCCUGGC	GCUGGGG				23S Ribosomal RNA	23S Ribosomal RNA	23S Ribosomal RNA	thermus thermophilus	thermus thermophilus	thermus thermophilus		O2'(hydroxyl)-N2(amino)[3.41]_N1-O2'(hydroxyl)[2.56]_N3-N2(amino)[3.42]	(3,3)	4	3	9	9	0	0	0	0	0		tSS
4y4o.cif1	intra	0	449	2A.A.1384.	2A.G.1343.	2A.C.1404.	WC	19-XIX	cWW	cW-W	I	A|G-C	JP	S	S	LC	LC	SM	GGCAGCC	UUAGGCG	GCCCUUC	abAcdeDfgFEChBHiGI	1,2,3,4,5,6,7,8,-7,-6,-5,-4,-3,-2,-1,9,10,11,12,13,14,-13,15,16,17,18,19,20,21,22,23,-22,-21,-20,-19,-18,-17,-16,-15,-14,-12,-11,-10,-9,24,25,26,27,28,29,30,-8,-30,-29,-28,-27,-26,-25,-24,31,32,33,34,35,36,-23,-36,-35,-34,-33,-32,-31	13	23S Ribosomal RNA	23S Ribosomal RNA	23S Ribosomal RNA	thermus thermophilus	thermus thermophilus	thermus thermophilus	N1-O2'(hydroxyl)[2.80]_N3-N2(amino)[3.11]	O2'(hydroxyl)-O2'(hydroxyl)[2.79]_O2'(hydroxyl)-O2(carbonyl)[2.95]	(1,1)	3	3	2	2	0	0	0	0	0	tSS
4y4o.cif1	intra	200	450	2A.A.1392.	2A.C.1315.	2A.G.1337.	WC	19-XIX	cWW	cW-W	II	A|C-G	HC	S	S	LR	LR	SM	GUUAAUA	UUCCUAC	GUAGGGU				23S Ribosomal RNA	23S Ribosomal RNA	23S Ribosomal RNA	thermus thermophilus	thermus thermophilus	thermus thermophilus	O2'(hydroxyl)-O3'[3.19]_O2'(hydroxyl)-O2'(hydroxyl)[2.67]_N3-O2'(hydroxyl)[2.93]		(2,2)	3	8	6	6	0	1	0	0	1	cSS
4y4o.cif1	intra	200	450	2A.A.1393.	2A.C.1314.	2A.G.1338.	WC	19-XIX	cWW	cW-W	I	A|C-G	HC	S	S	LR	LR	SM	UUAAUAU	GUUCCUA	UAGGGUU				23S Ribosomal RNA	23S Ribosomal RNA	23S Ribosomal RNA	thermus thermophilus	thermus thermophilus	thermus thermophilus		N1-O2'(hydroxyl)[2.78]_N3-N2(amino)[3.22]	(2,2)	3	8	6	6	0	1	0	0	1		tWS
4y4o.cif1	intra	201	451	2A.A.1449.	2A.G.1448.	2A.C.1463.	WC	19-XIX	cWW	cW-W	X	A|G-C	BC	S	S	LC	LC	SM	CGGAGCC	CCGGAGC	AGCCCGG	abAcdeDfgFEChBHiGI	1,2,3,4,5,6,7,8,-7,-6,-5,-4,-3,-2,-1,9,10,11,12,13,14,-13,15,16,17,18,19,20,21,22,23,-22,-21,-20,-19,-18,-17,-16,-15,-14,-12,-11,-10,-9,24,25,26,27,28,29,30,-8,-30,-29,-28,-27,-26,-25,-24,31,32,33,34,35,36,-23,-36,-35,-34,-33,-32,-31	21	23S Ribosomal RNA	23S Ribosomal RNA	23S Ribosomal RNA	thermus thermophilus	thermus thermophilus	thermus thermophilus	O4'-O2'(hydroxyl)[3.34]	N6(amino)-O2(carbonyl)[3.07]	(5,3)	5	1	4	4	0	0	0	0	0
4y4o.cif1	intra	0	452	2A.A.1457.	2A.C.1451.	2A.G.1459.	WC	19-XIX	cWW	cW-W	X	A|C-G	HPJP	HP	HPJP	SM	SM	SM	UGGACGA	AGCCAUG	GACGAGC				23S Ribosomal RNA	23S Ribosomal RNA	23S Ribosomal RNA	thermus thermophilus	thermus thermophilus	thermus thermophilus		N3-N2(amino)[3.21]	(1,1)	2	4	3	4	0	0	0	0	0		cSW
4y4o.cif1	intra	0	453	2A.A.1496.	2A.G.1421.	2A.C.1577.	WC	19-XIX	cWW	cW-W	II	A|G-C	HC	S	S	LR	LR	SM	CAAAUCC	GAUGGGG	CCUCUAA	abAcdeDfgFEChBHiGI	1,2,3,4,5,6,7,8,-7,-6,-5,-4,-3,-2,-1,9,10,11,12,13,14,-13,15,16,17,18,19,20,21,22,23,-22,-21,-20,-19,-18,-17,-16,-15,-14,-12,-11,-10,-9,24,25,26,27,28,29,30,-8,-30,-29,-28,-27,-26,-25,-24,31,32,33,34,35,36,-23,-36,-35,-34,-33,-32,-31	17	23S Ribosomal RNA	23S Ribosomal RNA	23S Ribosomal RNA	thermus thermophilus	thermus thermophilus	thermus thermophilus		O2'(hydroxyl)-O3'[2.57]_O2'(hydroxyl)-O2'(hydroxyl)[2.87]_N3-O2'(hydroxyl)[2.66]	(1,1)	3	5	4	4	0	0	0	0	0
4y4o.cif1	intra	201	451	2A.A.1528.	2A.G.1447.	2A.C.1464.	WC	19-XIX	cWW	cW-W	II	A|G-C	JCJP	S	S	LC	LC	SM	GGGAAGC	ACCGGAG	GCCCGGC	abAcdeDfgFEChBHiGI	1,2,3,4,5,6,7,8,-7,-6,-5,-4,-3,-2,-1,9,10,11,12,13,14,-13,15,16,17,18,19,20,21,22,23,-22,-21,-20,-19,-18,-17,-16,-15,-14,-12,-11,-10,-9,24,25,26,27,28,29,30,-8,-30,-29,-28,-27,-26,-25,-24,31,32,33,34,35,36,-23,-36,-35,-34,-33,-32,-31	21	23S Ribosomal RNA	23S Ribosomal RNA	23S Ribosomal RNA	thermus thermophilus	thermus thermophilus	thermus thermophilus		O2'(hydroxyl)-O2'(hydroxyl)[2.61]_N3-O2'(hydroxyl)[3.02]	(5,3)	5	4	4	4	1	0	0	0	1
4y4o.cif1	intra	201	451	2A.A.1528.A	2A.G.1448.	2A.C.1463.	WC	19-XIX	cWW	cW-W	I	A|G-C	JCJP	S	S	LC	LC	SM	GGAAGCC	CCGGAGC	AGCCCGG	abAcdeDfgFEChBHiGI	1,2,3,4,5,6,7,8,-7,-6,-5,-4,-3,-2,-1,9,10,11,12,13,14,-13,15,16,17,18,19,20,21,22,23,-22,-21,-20,-19,-18,-17,-16,-15,-14,-12,-11,-10,-9,24,25,26,27,28,29,30,-8,-30,-29,-28,-27,-26,-25,-24,31,32,33,34,35,36,-23,-36,-35,-34,-33,-32,-31	21	23S Ribosomal RNA	23S Ribosomal RNA	23S Ribosomal RNA	thermus thermophilus	thermus thermophilus	thermus thermophilus	N6(amino)-O2'(hydroxyl)[3.19]_N1-O2'(hydroxyl)[2.50]_N3-N2(amino)[3.09]	O2'(hydroxyl)-O2'(hydroxyl)[3.54]	(5,3)	5	4	4	4	1	0	0	0	1	tWS
4y4o.cif1	intra	201	451	2A.A.1544.	2A.G.1447.	2A.C.1464.	WC	19-XIX	cWW	cW-W	II	A|G-C	JCJP	S	S	LC	LC	SM	GACAACC	ACCGGAG	GCCCGGC	abAcdeDfgFEChBHiGI	1,2,3,4,5,6,7,8,-7,-6,-5,-4,-3,-2,-1,9,10,11,12,13,14,-13,15,16,17,18,19,20,21,22,23,-22,-21,-20,-19,-18,-17,-16,-15,-14,-12,-11,-10,-9,24,25,26,27,28,29,30,-8,-30,-29,-28,-27,-26,-25,-24,31,32,33,34,35,36,-23,-36,-35,-34,-33,-32,-31	21	23S Ribosomal RNA	23S Ribosomal RNA	23S Ribosomal RNA	thermus thermophilus	thermus thermophilus	thermus thermophilus	O2'(hydroxyl)-O2'(hydroxyl)[2.66]_N1-N2(amino)[3.47]_N3-O2'(hydroxyl)[3.14]		(5,3)	5	6	4	4	0	0	0	0	0	cWS
4y4o.cif1	intra	201	451	2A.A.1545.	2A.C.1446.	2A.G.1465.	WC	19-XIX	cWW	cW-W	I	A|C-G	JCJP	S	S	LC	LC	SM	ACAACCC	GACCGGA	CCCGGCC	abAcdeDfgFEChBHiGI	1,2,3,4,5,6,7,8,-7,-6,-5,-4,-3,-2,-1,9,10,11,12,13,14,-13,15,16,17,18,19,20,21,22,23,-22,-21,-20,-19,-18,-17,-16,-15,-14,-12,-11,-10,-9,24,25,26,27,28,29,30,-8,-30,-29,-28,-27,-26,-25,-24,31,32,33,34,35,36,-23,-36,-35,-34,-33,-32,-31	21	23S Ribosomal RNA	23S Ribosomal RNA	23S Ribosomal RNA	thermus thermophilus	thermus thermophilus	thermus thermophilus	O3'-O2'(hydroxyl)[3.08]_O2'(hydroxyl)-O2'(hydroxyl)[2.77]_O2'(hydroxyl)-O2(carbonyl)[2.84]	N1-O2'(hydroxyl)[2.84]_N3-N2(amino)[3.41]	(5,3)	5	6	4	4	0	0	0	0	0		tSS
4y4o.cif1	intra	202	454	2A.A.1569.	2A.C.1351.	2A.G.1380.	WC	19-XIX	cWW	cW-W	X	A|C-G	ICJP	S	S	LR	LR	SM	AAGAAAA	GACCUAA	GAAGGGC				23S Ribosomal RNA	23S Ribosomal RNA	23S Ribosomal RNA	thermus thermophilus	thermus thermophilus	thermus thermophilus		N6(amino)-O2'(hydroxyl)[2.77]	(4,2)	3	9	2	2	1	0	0	0	1
4y4o.cif1	intra	202	454	2A.A.1570.	2A.C.1351.	2A.G.1380.	WC	19-XIX	cWW	cW-W	X	A|C-G	ICJP	S	S	LR	LR	SM	AGAAAAG	GACCUAA	GAAGGGC				23S Ribosomal RNA	23S Ribosomal RNA	23S Ribosomal RNA	thermus thermophilus	thermus thermophilus	thermus thermophilus		N1-N2(amino)[2.94]	(4,2)	3	9	2	2	1	0	0	0	1		tWS
4y4o.cif1	intra	202	454	2A.A.1571.	2A.C.1351.	2A.G.1380.	WC	19-XIX	cWW	cW-W	II	A|C-G	ICJP	S	S	LR	LR	SM	GAAAAGC	GACCUAA	GAAGGGC				23S Ribosomal RNA	23S Ribosomal RNA	23S Ribosomal RNA	thermus thermophilus	thermus thermophilus	thermus thermophilus	O2'(hydroxyl)-O3'[2.62]_O2'(hydroxyl)-O2'(hydroxyl)[2.75]_N3-O2'(hydroxyl)[2.72]		(4,2)	3	9	2	2	1	0	0	0	1
4y4o.cif1	intra	202	454	2A.A.1572.	2A.C.1350.	2A.G.1381.	WC	19-XIX	cWW	cW-W	I	A|C-G	ICJP	S	S	LR	LR	SM	AAAAGCC	GGACCUA	AAGGGCA				23S Ribosomal RNA	23S Ribosomal RNA	23S Ribosomal RNA	thermus thermophilus	thermus thermophilus	thermus thermophilus	O2'(hydroxyl)-O2'(hydroxyl)[3.30]	N3-N2(amino)[3.34]	(4,2)	3	9	2	2	0	0	0	0	0
4y4o.cif1	intra	0	455	2A.A.1586.	2A.G.1416.	2A.C.1582.	WC	19-XIX	cWW	cW-W	X	A|G-C	BCJP	S	S	LC	LC	SM	CACAACC	GGUGCGA	AAGCACA	abAcdeDfgFEChBHiGI	1,2,3,4,5,6,7,8,-7,-6,-5,-4,-3,-2,-1,9,10,11,12,13,14,-13,15,16,17,18,19,20,21,22,23,-22,-21,-20,-19,-18,-17,-16,-15,-14,-12,-11,-10,-9,24,25,26,27,28,29,30,-8,-30,-29,-28,-27,-26,-25,-24,31,32,33,34,35,36,-23,-36,-35,-34,-33,-32,-31	16	23S Ribosomal RNA	23S Ribosomal RNA	23S Ribosomal RNA	thermus thermophilus	thermus thermophilus	thermus thermophilus	N1-N2(amino)[3.01]	N3-O2'(hydroxyl)[2.93]	(1,1)	3	3	2	2	0	0	0	0	0	tW.
4y4o.cif1	intra	0	456	2A.A.1610.	2A.G.1310.	2A.C.1604.	WC	19-XIX	cWW	cW-W	I	A|G-C	JCJP	S	S	LC	LC	SM	CAAACCG	AAGGGUU	GUACCGC	abAcdeDfgFEChBHiGI	1,2,3,4,5,6,7,8,-7,-6,-5,-4,-3,-2,-1,9,10,11,12,13,14,-13,15,16,17,18,19,20,21,22,23,-22,-21,-20,-19,-18,-17,-16,-15,-14,-12,-11,-10,-9,24,25,26,27,28,29,30,-8,-30,-29,-28,-27,-26,-25,-24,31,32,33,34,35,36,-23,-36,-35,-34,-33,-32,-31	12	23S Ribosomal RNA	23S Ribosomal RNA	23S Ribosomal RNA	thermus thermophilus	thermus thermophilus	thermus thermophilus	N3-N2(amino)[3.34]	N6(amino)-O2'(hydroxyl)[3.18]_N1-O2'(hydroxyl)[2.55]	(1,1)	3	5	2	2	0	0	0	0	0	cSS
4y4o.cif1	intra	0	457	2A.A.1616.	2A.G.1324.	2A.C.1330.	WC	19-XIX	cWW	cW-W	X	A|G-C	HC	S	S	LR	LR	SM	GACACAG	AAUGGUC	CGUCAGC				23S Ribosomal RNA	23S Ribosomal RNA	23S Ribosomal RNA	thermus thermophilus	thermus thermophilus	thermus thermophilus	N6(amino)-N3[3.34]		(1,1)	3	6	2	2	0	0	0	0	0	cWS
4y4o.cif1	intra	0	458	2A.A.1632.	2A.G.700.	2A.C.732.	WC	19-XIX	cWW	cW-W	II	A|G-C	HC	S	S	LR	LR	SM	GCAAGAG	CCAGGGU	GCCCGAA				23S Ribosomal RNA	23S Ribosomal RNA	23S Ribosomal RNA	thermus thermophilus	thermus thermophilus	thermus thermophilus	O2'(hydroxyl)-O3'[3.20]_O2'(hydroxyl)-O2'(hydroxyl)[2.81]_N3-O2'(hydroxyl)[2.30]		(1,1)	3	4	3	3	1	0	0	0	1	cWS
4y4o.cif1	intra	0	459	2A.A.1668.	2A.G.1674.	2A.C.1990.	WC	19-XIX	cWW	cW-W	X	A|G-C	JC	JC	JC	SM	SM	SM	AGGAACU	UCUGCAA	GCGCUGU				23S Ribosomal RNA	23S Ribosomal RNA	23S Ribosomal RNA	thermus thermophilus	thermus thermophilus	thermus thermophilus	O2'(hydroxyl)-N7[2.58]		(1,1)	2	15	15	5	1	0	0	0	1
4y4o.cif1	intra	0	460	2A.A.1755.	2A.G.2694.	2A.C.2715.	WC	19-XIX	cWW	cW-W	X	A|G-C	JC	S	S	LR	LR	SM	CGCAGUG	CCAGCUG	AAGCUGG	abAcdeDfgFEChBHiGI	1,2,3,4,5,6,7,8,-7,-6,-5,-4,-3,-2,-1,9,10,11,12,13,14,-13,15,16,17,18,19,20,21,22,23,-22,-21,-20,-19,-18,-17,-16,-15,-14,-12,-11,-10,-9,24,25,26,27,28,29,30,-8,-30,-29,-28,-27,-26,-25,-24,31,32,33,34,35,36,-23,-36,-35,-34,-33,-32,-31	35	23S Ribosomal RNA	23S Ribosomal RNA	23S Ribosomal RNA	thermus thermophilus	thermus thermophilus	thermus thermophilus	N6(amino)-O2'(hydroxyl)[2.82]_N6(amino)-N3[3.40]_N1-N2(amino)[3.03]		(1,1)	3	12	5	5	0	0	0	0	0	tWS
4y4o.cif1	intra	203	461	2A.A.1759.	2A.U.2696.	2A.A.2711.	WC	20-XX	cWW	cW-W	X	A|U-A	JC	S	S	LR	LR	SM	GUGAACA	AGCUGUC	GGCAUAA	abAcdeDfgFEChBHiGI	1,2,3,4,5,6,7,8,-7,-6,-5,-4,-3,-2,-1,9,10,11,12,13,14,-13,15,16,17,18,19,20,21,22,23,-22,-21,-20,-19,-18,-17,-16,-15,-14,-12,-11,-10,-9,24,25,26,27,28,29,30,-8,-30,-29,-28,-27,-26,-25,-24,31,32,33,34,35,36,-23,-36,-35,-34,-33,-32,-31	36	23S Ribosomal RNA	23S Ribosomal RNA	23S Ribosomal RNA	thermus thermophilus	thermus thermophilus	thermus thermophilus	N7-O2'(hydroxyl)[2.88]		(2,2)	5	12	6	6	1	1	0	0	1
4y4o.cif1	intra	203	461	2A.A.1760.	2A.C.1631.	2A.G.1635.	WC	19-XIX	cWW	cW-W	X	A|C-G	JC	S	S	LR	LR	SM	UGAACAG	GUGCAAG	AGAGCAC				23S Ribosomal RNA	23S Ribosomal RNA	23S Ribosomal RNA	thermus thermophilus	thermus thermophilus	thermus thermophilus	N6(amino)-O2'(hydroxyl)[3.13]		(2,2)	5	12	5	5	0	1	0	0	1	tWS
4y4o.cif1	intra	204	462	2A.A.1785.	2A.G.2588.	2A.C.2606.	WC	19-XIX	cWW	cW-W	I	A|G-C	HC	JC	JC	LR	LR	SM	CAAAAAC	UCAGAAC	GUMCGGU				23S Ribosomal RNA	23S Ribosomal RNA	23S Ribosomal RNA	thermus thermophilus	thermus thermophilus	thermus thermophilus	N1-O2'(hydroxyl)[2.63]_N3-N2(amino)[3.47]		(2,2)	4	9	9	10	0	0	0	0	0	tWS
4y4o.cif1	intra	205	463	2A.A.1802.	2A.U.1798.	2A.A.1821.	WC	20-XX	cWW	cW-W	X	A|U-A	IC	S	S	LC	LC	SM	GCGAACU	CUCUGCG	UAUAGGG				23S Ribosomal RNA	23S Ribosomal RNA	23S Ribosomal RNA	thermus thermophilus	thermus thermophilus	thermus thermophilus	O2'(hydroxyl)-O3'[3.16]_O2'(hydroxyl)-O2'(hydroxyl)[2.70]_N3-O2'(hydroxyl)[2.92]		(2,2)	3	5	7	7	1	0	0	0	1
4y4o.cif1	intra	205	463	2A.A.1803.	2A.C.1797.	2A.G.1822.	WC	19-XIX	cWW	cW-W	I	A|C-G	IC	S	S	LC	LC	SM	CGAACUC	UCUCUGC	AUAGGGA				23S Ribosomal RNA	23S Ribosomal RNA	23S Ribosomal RNA	thermus thermophilus	thermus thermophilus	thermus thermophilus	O2'(hydroxyl)-O2'(hydroxyl)[3.45]	N1-O2'(hydroxyl)[2.65]_N3-N2(amino)[3.27]	(2,2)	3	5	7	7	0	0	0	0	0		tSS
4y4o.cif1	intra	206	464	2A.A.1809.	2A.C.1363.	2A.G.1368.	WC	19-XIX	cWW	cW-W	II	A|C-G	HC	S	S	LR	LR	SM	CGUAAGA	AGCCGAA	AAAGGCG				23S Ribosomal RNA	23S Ribosomal RNA	23S Ribosomal RNA	thermus thermophilus	thermus thermophilus	thermus thermophilus	O2'(hydroxyl)-O3'[3.19]_O2'(hydroxyl)-O2'(hydroxyl)[2.82]_N3-O2'(hydroxyl)[2.69]		(2,2)	3	4	3	3	1	0	0	0	1
4y4o.cif1	intra	206	464	2A.A.1810.	2A.C.1362.	2A.G.1369.	WC	19-XIX	cWW	cW-W	I	A|C-G	HC	S	S	LR	LR	SM	GUAAGAG	AAGCCGA	AAGGCGU				23S Ribosomal RNA	23S Ribosomal RNA	23S Ribosomal RNA	thermus thermophilus	thermus thermophilus	thermus thermophilus	O2'(hydroxyl)-O2'(hydroxyl)[2.43]_O2'(hydroxyl)-O2(carbonyl)[3.17]	N1-O2'(hydroxyl)[3.28]_N3-N2(amino)[2.88]	(2,2)	3	4	3	3	1	0	0	0	1		tSS
4y4o.cif1	intra	207	465	2A.A.1848.	2A.G.1846.	2A.C.1894.	WC	19-XIX	cWW	cW-W	X	A|G-C	BC	S	S	LC	LC	SM	GGAAGGU	CCGGAAG	GCCCCGG				23S Ribosomal RNA	23S Ribosomal RNA	23S Ribosomal RNA	thermus thermophilus	thermus thermophilus	thermus thermophilus		N6(amino)-O2(carbonyl)[2.70]	(2,1)	4	2	5	5	1	0	0	0	1		cW.
4y4o.cif1	intra	208	466	2A.A.1853.	2A.U.2086.	2A.U.2233.	NA	16-XVI	cWW	cW-W	X	A|U-U	IC	IC	IC	LR	LR	SM	GUCAAGG	GCCUGGU	GCUUGGC				23S Ribosomal RNA	23S Ribosomal RNA	23S Ribosomal RNA	thermus thermophilus	thermus thermophilus	thermus thermophilus		O2'(hydroxyl)-O3'[3.06]_O2'(hydroxyl)-O2'(hydroxyl)[3.14]_N3-O2'(hydroxyl)[2.50]	(4,3)	8	3	1	1	0	0	0	0	0
4y4o.cif1	intra	208	466	2A.A.1854.	2A.G.2087.	2A.U.2232.	WB	28-XXVIII	cWW	cW-W	I	A|G-U	IC	S	S	LR	LR	SM	UCAAGGG	CCUGGUG	CGCUUGG				23S Ribosomal RNA	23S Ribosomal RNA	23S Ribosomal RNA	thermus thermophilus	thermus thermophilus	thermus thermophilus	N1-O2'(hydroxyl)[2.75]_N3-N2(amino)[3.05]		(4,3)	8	3	5	5	0	0	0	0	0	tSS
4y4o.cif1	intra	208	466	2A.A.1889.	2A.C.2085.	2A.G.2234.	WC	19-XIX	cWW	cW-W	X	A|C-G	IC	S	S	LR	LR	SM	CCGAAGC	AGCCUGG	CUUGGCG				23S Ribosomal RNA	23S Ribosomal RNA	23S Ribosomal RNA	thermus thermophilus	thermus thermophilus	thermus thermophilus		N6(amino)-O2'(hydroxyl)[3.11]	(4,3)	8	3	3	3	0	0	0	0	0
4y4o.cif1	intra	208	466	2A.A.1889.	2A.U.2086.	2A.U.2233.	NA	16-XVI	cWW	cW-W	X	A|U-U	IC	IC	IC	LR	LR	SM	CCGAAGC	GCCUGGU	GCUUGGC				23S Ribosomal RNA	23S Ribosomal RNA	23S Ribosomal RNA	thermus thermophilus	thermus thermophilus	thermus thermophilus	O2'(hydroxyl)-O3'[2.67]_O2'(hydroxyl)-O2'(hydroxyl)[2.70]_N3-O2'(hydroxyl)[2.88]		(4,3)	8	3	1	1	0	0	0	0	0
4y4o.cif1	intra	208	466	2A.A.1890.	2A.C.2085.	2A.G.2234.	WC	19-XIX	cWW	cW-W	I	A|C-G	IC	S	S	LR	LR	SM	CGAAGCC	AGCCUGG	CUUGGCG				23S Ribosomal RNA	23S Ribosomal RNA	23S Ribosomal RNA	thermus thermophilus	thermus thermophilus	thermus thermophilus	O2'(hydroxyl)-O2'(hydroxyl)[2.75]	N1-O2'(hydroxyl)[2.89]_N3-N2(amino)[3.12]	(4,3)	8	3	3	3	0	0	0	0	0		tSS
4y4o.cif1	intra	209	467	2A.A.1900.	2A.C.1793.	2A.G.1826.	WC	19-XIX	cWW	cW-W	I	A|C-G	BC	S	S	LR	LR	SM	GUGAACG	CAGCUCU	GGAGCGA				23S Ribosomal RNA	23S Ribosomal RNA	23S Ribosomal RNA	thermus thermophilus	thermus thermophilus	thermus thermophilus	N1-O2'(hydroxyl)[2.64]	N3-N2(amino)[3.45]	(3,3)	6	2	7	7	1	0	0	0	1	tWS	cSS
4y4o.cif1	inter	0	468	2A.A.1912.	2a.5MC.1407.	2a.G.1494.	WC	19-XIX	cWW	cW-W	I	A|c-G	HC	IC	IC	LR	LR	SM	CGMAACM	MGUMACG	GAAGUCG				23S Ribosomal RNA	16S Ribosomal RNA	16S Ribosomal RNA	thermus thermophilus	thermus thermophilus	thermus thermophilus	N1-O2'(hydroxyl)[2.63]	O3'-O2'(hydroxyl)[2.88]_O2'(hydroxyl)-O2'(hydroxyl)[2.70]_O2'(hydroxyl)-N3[3.29]_N3-N2(amino)[3.01]	(1,1)	3	9	3	4	0	0	0	0	0		cSS
4y4o.cif1	intra	210	469	2A.A.1927.	2A.C.1837.	2A.G.1903.	WC	19-XIX	cWW	cW-W	II	A|C-G	JC	S	S	LC	LC	SM	CCUAAGG	UGCCCGG	AACGGCG				23S Ribosomal RNA	23S Ribosomal RNA	23S Ribosomal RNA	thermus thermophilus	thermus thermophilus	thermus thermophilus	O2'(hydroxyl)-O3'[3.22]_O2'(hydroxyl)-O2'(hydroxyl)[2.81]_N3-O2'(hydroxyl)[2.71]		(2,2)	3	20	3	3	0	0	0	0	0
4y4o.cif1	intra	210	469	2A.A.1928.	2A.C.1836.	2A.G.1904.	WC	19-XIX	cWW	cW-W	I	A|C-G	JC	S	S	LC	LC	SM	CUAAGGU	UUGCCCG	ACGGCGG				23S Ribosomal RNA	23S Ribosomal RNA	23S Ribosomal RNA	thermus thermophilus	thermus thermophilus	thermus thermophilus	O2'(hydroxyl)-O2'(hydroxyl)[3.41]	N1-O2'(hydroxyl)[2.74]_N3-N2(amino)[3.32]	(2,2)	3	20	3	3	0	0	0	0	0		tWS
4y4o.cif1	intra	0	470	2A.A.1937.	2A.C.1934.	2A.G.1964.	WC	19-XIX	cWW	cW-W	X	A|C-G	JC	JC	JC	SM	SM	SM	CGAAAMU	UAGCGAA	CMUGCAC				23S Ribosomal RNA	23S Ribosomal RNA	23S Ribosomal RNA	thermus thermophilus	thermus thermophilus	thermus thermophilus		N1-N2(amino)[3.39]	(1,1)	2	20	20	10	1	0	0	0	1
4y4o.cif1	intra	204	462	2A.A.1938.	2A.A.2589.	2A.PSU.2605.	NA	n/a	cWW	cW-W	X	A|A-P	JC	JC	JC	LR	LR	SM	GAAAMUC	CAGAACG	AGUMCGG				23S Ribosomal RNA	23S Ribosomal RNA	23S Ribosomal RNA	thermus thermophilus	thermus thermophilus	thermus thermophilus		N3-O2'(hydroxyl)[2.82]	(2,2)	4	20	9	10	1	0	0	0	1		cSS
4y4o.cif1	intra	211	471	2A.A.1952.	2A.G.2548.	2A.C.2560.	WC	19-XIX	cWW	cW-W	II	A|G-C	HC	S	S	LR	LR	SM	GGUAAGU	GUUGGGC	GCCCAUU				23S Ribosomal RNA	23S Ribosomal RNA	23S Ribosomal RNA	thermus thermophilus	thermus thermophilus	thermus thermophilus		O2'(hydroxyl)-O2'(hydroxyl)[2.69]_N3-O2'(hydroxyl)[2.82]	(2,2)	3	7	5	5	1	0	0	0	1
4y4o.cif1	intra	211	471	2A.A.1953.	2A.G.2549.	2A.C.2559.	WC	19-XIX	cWW	cW-W	I	A|G-C	HC	S	S	LR	LR	SM	GUAAGUU	UUGGGCM	CGCCCAU				23S Ribosomal RNA	23S Ribosomal RNA	23S Ribosomal RNA	thermus thermophilus	thermus thermophilus	thermus thermophilus	N1-O2'(hydroxyl)[2.60]_N3-N2(amino)[2.73]	O3'-O2'(hydroxyl)[3.14]_O2'(hydroxyl)-O2'(hydroxyl)[2.70]_O2'(hydroxyl)-O2(carbonyl)[2.70]	(2,2)	3	7	5	5	1	0	0	0	1	tSS
4y4o.cif1	intra	0	472	2A.A.1966.	2A.G.2592.	2A.C.2601.	WC	19-XIX	cWW	cW-W	X	A|G-C	JC	S	S	LR	LR	SM	UGCACGA	AACGUCG	AGACAGU				23S Ribosomal RNA	23S Ribosomal RNA	23S Ribosomal RNA	thermus thermophilus	thermus thermophilus	thermus thermophilus	N3-O2'(hydroxyl)[2.73]		(1,1)	3	10	3	3	0	0	0	0	0	cWS
4y4o.cif1	intra	209	467	2A.A.1969.	2A.U.1833.	2A.A.1972.	WC	20-XX	cWW	cW-W	I	A|U-A	JC	S	S	LC	LC	SM	ACGAAAA	CGCUUGC	AAAAGCG				23S Ribosomal RNA	23S Ribosomal RNA	23S Ribosomal RNA	thermus thermophilus	thermus thermophilus	thermus thermophilus	N1-O2'(hydroxyl)[2.41]	O3'-O2'(hydroxyl)[3.32]_O2'(hydroxyl)-O2'(hydroxyl)[2.67]_O2'(hydroxyl)-N3[2.66]	(3,3)	6	10	4	4	1	0	0	0	1
4y4o.cif1	intra	209	467	2A.A.1970.	2A.G.1792.	2A.C.1827.	WC	19-XIX	cWW	cW-W	X	A|G-C	JC	S	S	LR	LR	SM	CGAAAAG	ACAGCUC	GAGCGAC				23S Ribosomal RNA	23S Ribosomal RNA	23S Ribosomal RNA	thermus thermophilus	thermus thermophilus	thermus thermophilus		O2'(hydroxyl)-O4'[3.04]_N3-O2'(hydroxyl)[2.59]	(3,3)	6	10	7	7	1	0	0	0	1		cSS
4y4o.cif1	intra	209	467	2A.A.1970.	2A.C.1793.	2A.G.1826.	WC	19-XIX	cWW	cW-W	X	A|C-G	JC	S	S	LR	LR	SM	CGAAAAG	CAGCUCU	GGAGCGA				23S Ribosomal RNA	23S Ribosomal RNA	23S Ribosomal RNA	thermus thermophilus	thermus thermophilus	thermus thermophilus		O3'-O2'(hydroxyl)[3.52]	(3,3)	6	10	7	7	1	0	0	0	1
4y4o.cif1	intra	0	473	2A.A.1981.	2A.G.738.	2A.C.758.	WC	19-XIX	cWW	cW-W	II	A|G-C	BC	S	S	LR	LR	SM	ACGACCG	ACCGGUG	CCUCGGA				23S Ribosomal RNA	23S Ribosomal RNA	23S Ribosomal RNA	thermus thermophilus	thermus thermophilus	thermus thermophilus	N1-N2(amino)[3.14]	N3-O2'(hydroxyl)[2.67]	(1,1)	3	1	3	3	0	0	0	0	0	tW.	cWS
4y4o.cif1	intra	192	432	2A.A.2031.	2A.G.2455.	2A.C.2496.	WC	19-XIX	cWW	cW-W	X	A|G-C	HC	S	S	LR	LR	SM	UGAAGAU	CAGGCUG	UGGCACC				23S Ribosomal RNA	23S Ribosomal RNA	23S Ribosomal RNA	thermus thermophilus	thermus thermophilus	thermus thermophilus	N3-O2'(hydroxyl)[2.45]		(3,3)	4	8	3	3	0	0	0	0	0	cSS
4y4o.cif1	intra	0	474	2A.A.2173.	2A.G.2127.	2A.C.2161.	WC	19-XIX	cWW	cW-W	X	A|G-C	IC	S	S	LC	LC	SM	AAUACCA	GGAGCCU	AGGCGCC				23S Ribosomal RNA	23S Ribosomal RNA	23S Ribosomal RNA	thermus thermophilus	thermus thermophilus	thermus thermophilus	N1-O2'(hydroxyl)[2.56]_N3-N2(amino)[3.33]	O2'(hydroxyl)-O2'(hydroxyl)[2.41]	(1,1)	3	12	3	3	0	1	0	0	1
4y4o.cif1	intra	212	475	2A.A.2273.	2A.A.953.	2A.C.964.	-W	n/a	cWW	cW-W	II	A|A-C	HC	IC	IC	LR	LR	SM	GGUAACG	GCGAGCG	CGUCCGC				23S Ribosomal RNA	23S Ribosomal RNA	23S Ribosomal RNA	thermus thermophilus	thermus thermophilus	thermus thermophilus		O2'(hydroxyl)-O3'[3.04]_O2'(hydroxyl)-O2'(hydroxyl)[2.64]_N3-O2'(hydroxyl)[2.62]	(2,2)	5	11	1	1	1	0	1	0	1
4y4o.cif1	intra	212	475	2A.A.2274.	2A.A.953.	2A.C.964.	-W	n/a	cWW	cW-W	X	A|A-C	HC	IC	IC	LR	LR	SM	GUAACGG	GCGAGCG	CGUCCGC				23S Ribosomal RNA	23S Ribosomal RNA	23S Ribosomal RNA	thermus thermophilus	thermus thermophilus	thermus thermophilus		O4'-O2'(hydroxyl)[3.19]	(2,2)	5	11	1	1	1	0	1	0	1
4y4o.cif1	intra	212	475	2A.A.2274.	2A.G.954.	2A.U.963.	WB	28-XXVIII	cWW	cW-W	X	A|G-U	HC	S	S	LR	LR	SM	GUAACGG	CGAGCGA	ACGUCCG				23S Ribosomal RNA	23S Ribosomal RNA	23S Ribosomal RNA	thermus thermophilus	thermus thermophilus	thermus thermophilus	N1-O2'(hydroxyl)[2.46]_N3-N2(amino)[3.13]		(2,2)	5	11	2	2	1	0	1	0	1	t.S
4y4o.cif1	intra	0	476	2A.A.2288.	2A.C.2284.	2A.G.2384.	WC	19-XIX	cWW	cW-W	X	A|C-G	JC	S	S	LC	LC	SM	CAAAGGU	CGCCCAA	CGGGCCU	abAB	1,2,3,4,-3,-2,-1,-4	1	23S Ribosomal RNA	23S Ribosomal RNA	23S Ribosomal RNA	thermus thermophilus	thermus thermophilus	thermus thermophilus	N1-O2'(hydroxyl)[2.78]	N3-N2(amino)[3.41]	(1,1)	3	3	2	2	0	0	0	0	0
4y4o.cif1	intra	213	477	2A.A.2327.	2A.C.2261.	2A.G.2279.	WC	19-XIX	cWW	cW-W	I	A|C-G	HP	S	S	LR	LR	SM	CGCAAGG	CGCCUCC	GGAGGCG				23S Ribosomal RNA	23S Ribosomal RNA	23S Ribosomal RNA	thermus thermophilus	thermus thermophilus	thermus thermophilus	N1-O2'(hydroxyl)[2.94]	O2'(hydroxyl)-O2'(hydroxyl)[2.76]_N3-N2(amino)[3.10]	(2,2)	4	3	6	6	1	0	0	0	1		cSS
4y4o.cif1	intra	0	478	2A.A.2336.	2A.C.2324.	2A.G.2331.	WC	19-XIX	cWW	cW-W	I	A|C-G	JCJP	S	S	LC	LC	SM	AGAAGGG	GAGCGCA	AGGGUAG	abAB	1,2,3,4,-3,-2,-1,-4	3	23S Ribosomal RNA	23S Ribosomal RNA	23S Ribosomal RNA	thermus thermophilus	thermus thermophilus	thermus thermophilus		N6(amino)-O2'(hydroxyl)[3.37]_N1-O2'(hydroxyl)[2.57]_N3-N2(amino)[3.30]	(1,1)	3	4	2	2	0	0	0	0	0		t.S
4y4o.cif1	intra	213	477	2A.A.2388.	2A.C.2260.	2A.G.2280.	WC	19-XIX	cWW	cW-W	I	A|C-G	JIJP	S	S	LC	LC	SM	CCUAGUG	UCGCCUC	GAGGCGC				23S Ribosomal RNA	23S Ribosomal RNA	23S Ribosomal RNA	thermus thermophilus	thermus thermophilus	thermus thermophilus	O2'(hydroxyl)-O2'(hydroxyl)[2.62]	N1-O2'(hydroxyl)[2.57]_N3-N2(amino)[2.88]	(2,2)	4	7	6	6	0	0	0	0	0		tWS
4y4o.cif1	intra	179	405	2A.A.2434.	2A.A.2077.	2A.U.2243.	WC	20-XX	cWW	cW-W	I	A|A-U	JI	S	S	LC	LC	SM	UAAAAGU	UUUACUG	CAGUUUG				23S Ribosomal RNA	23S Ribosomal RNA	23S Ribosomal RNA	thermus thermophilus	thermus thermophilus	thermus thermophilus	O2'(hydroxyl)-O2'(hydroxyl)[2.84]_O2'(hydroxyl)-N3[2.86]	N1-O2'(hydroxyl)[3.07]	(2,2)	4	13	5	5	0	0	0	0	0
4y4o.cif1	intra	214	479	2A.A.2564.	2A.C.2521.	2A.G.2544.	WC	19-XIX	cWW	cW-W	II	A|C-G	JC	S	S	LC	LC	SM	AUUAAAG	AUCCUGG	AAGGGUU				23S Ribosomal RNA	23S Ribosomal RNA	23S Ribosomal RNA	thermus thermophilus	thermus thermophilus	thermus thermophilus	O2'(hydroxyl)-O3'[2.73]_O2'(hydroxyl)-O2'(hydroxyl)[2.74]_N3-O2'(hydroxyl)[2.65]		(2,2)	3	5	3	3	0	1	0	0	1	cSS
4y4o.cif1	intra	214	479	2A.A.2565.	2A.C.2520.	2A.G.2545.	WC	19-XIX	cWW	cW-W	I	A|C-G	JC	S	S	LC	LC	SM	UUAAAGC	CAUCCUG	AGGGUUG				23S Ribosomal RNA	23S Ribosomal RNA	23S Ribosomal RNA	thermus thermophilus	thermus thermophilus	thermus thermophilus	O2'(hydroxyl)-O2'(hydroxyl)[2.51]_O2'(hydroxyl)-O2(carbonyl)[3.28]	N1-O2'(hydroxyl)[2.76]_N3-N2(amino)[3.16]	(2,2)	3	5	3	3	0	0	0	0	0		tWS
4y4o.cif1	intra	0	480	2A.A.2572.	2A.A.2453.	2A.U.2500.	WC	20-XX	cWW	cW-W	X	A|A-U	IC	JC	JC	LR	LR	SM	GGCACGC	AACAGGC	ACCUCGM				23S Ribosomal RNA	23S Ribosomal RNA	23S Ribosomal RNA	thermus thermophilus	thermus thermophilus	thermus thermophilus	O4'-O2'(hydroxyl)[3.17]		(1,1)	3	6	8	11	0	0	0	0	0
4y4o.cif1	intra	0	481	2A.A.2598.	2A.C.2073.	2A.G.2436.	WC	19-XIX	cWW	cW-W	I	A|C-G	HC	S	S	LR	LR	SM	GUGAGAC	GAGCUUU	AAAGUUA	abAcdeDfgFEChBHiGI	1,2,3,4,5,6,7,8,-7,-6,-5,-4,-3,-2,-1,9,10,11,12,13,14,-13,15,16,17,18,19,20,21,22,23,-22,-21,-20,-19,-18,-17,-16,-15,-14,-12,-11,-10,-9,24,25,26,27,28,29,30,-8,-30,-29,-28,-27,-26,-25,-24,31,32,33,34,35,36,-23,-36,-35,-34,-33,-32,-31	28	23S Ribosomal RNA	23S Ribosomal RNA	23S Ribosomal RNA	thermus thermophilus	thermus thermophilus	thermus thermophilus	O2'(hydroxyl)-O2'(hydroxyl)[2.75]	N1-O2'(hydroxyl)[2.68]_N3-N2(amino)[2.99]	(1,1)	3	4	4	4	1	0	0	0	1		tSS
4y4o.cif1	intra	0	482	2A.A.2712.A	2A.U.1659.	2A.A.2001.	WC	20-XX	cWW	cW-W	I	A|U-A	BC	S	S	LR	LR	SM	CAUAAGC	CCCUCGC	GCGAGGG				23S Ribosomal RNA	23S Ribosomal RNA	23S Ribosomal RNA	thermus thermophilus	thermus thermophilus	thermus thermophilus	N1-O2'(hydroxyl)[2.71]		(1,1)	3	3	8	8	0	0	0	0	0
4y4o.cif1	intra	0	483	2A.A.2713.	2A.G.1661.	2A.C.1999.	WC	19-XIX	cWW	cW-W	X	A|G-C	BC	S	S	LR	LR	SM	AUAAGCU	CUCGCCA	CGGCGAG				23S Ribosomal RNA	23S Ribosomal RNA	23S Ribosomal RNA	thermus thermophilus	thermus thermophilus	thermus thermophilus	N1-O2'(hydroxyl)[3.38]		(1,1)	3	3	8	8	0	0	0	0	0
4y4o.cif1	intra	215	484	2A.A.2740.	2A.G.2523.	2A.C.2540.	WC	19-XIX	cWW	cW-W	X	A|G-C	IC	S	S	LR	LR	SM	GAUAACC	CCUGGGG	UCCCAAG				23S Ribosomal RNA	23S Ribosomal RNA	23S Ribosomal RNA	thermus thermophilus	thermus thermophilus	thermus thermophilus		O2'(hydroxyl)-O2'(hydroxyl)[2.66]_N3-O2'(hydroxyl)[2.72]	(3,2)	4	4	6	6	0	0	1	0	1
4y4o.cif1	intra	215	484	2A.A.2740.	2A.G.2524.	2A.C.2539.	WC	19-XIX	cWW	cW-W	X	A|G-C	IC	S	S	LR	LR	SM	GAUAACC	CUGGGGC	GUCCCAA				23S Ribosomal RNA	23S Ribosomal RNA	23S Ribosomal RNA	thermus thermophilus	thermus thermophilus	thermus thermophilus	N6(amino)-O2'(hydroxyl)[3.26]		(3,2)	4	4	6	6	0	0	1	0	1
4y4o.cif1	intra	215	484	2A.A.2741.	2A.G.2524.	2A.C.2539.	WC	19-XIX	cWW	cW-W	I	A|G-C	IC	S	S	LR	LR	SM	AUAACCG	CUGGGGC	GUCCCAA				23S Ribosomal RNA	23S Ribosomal RNA	23S Ribosomal RNA	thermus thermophilus	thermus thermophilus	thermus thermophilus	N1-O2'(hydroxyl)[2.90]_N3-N2(amino)[3.09]	O3'-O2'(hydroxyl)[3.34]_O2'(hydroxyl)-O2'(hydroxyl)[3.11]_O2'(hydroxyl)-O2(carbonyl)[2.79]	(3,2)	4	4	6	6	0	0	1	0	1	tSS
4y4o.cif1	intra	215	484	2A.A.2764.	2A.G.2523.	2A.C.2540.	WC	19-XIX	cWW	cW-W	I	A|G-C	IC	S	S	LR	LR	SM	GGGAAGC	CCUGGGG	UCCCAAG				23S Ribosomal RNA	23S Ribosomal RNA	23S Ribosomal RNA	thermus thermophilus	thermus thermophilus	thermus thermophilus	O3'-O2'(hydroxyl)[2.64]_O2'(hydroxyl)-O2'(hydroxyl)[2.67]_O2'(hydroxyl)-N3[3.10]_N3-N2(amino)[3.16]		(3,2)	4	4	6	6	1	0	0	0	1
4y4o.cif1	intra	0	485	2A.A.2801.A	2A.A.8.	2A.U.2895.	WC	20-XX	cWW	cW-W	X	A|A-U	HC	S	S	LR	LR	SM	UCAAGCC	AAGAUGG	AGGUCUU				23S Ribosomal RNA	23S Ribosomal RNA	23S Ribosomal RNA	thermus thermophilus	thermus thermophilus	thermus thermophilus		O2'(hydroxyl)-O4'[3.01]_N3-O2'(hydroxyl)[3.13]	(1,1)	3	5	3	3	0	0	0	0	0
4y4o.cif1	intra	216	486	2A.A.2809.	2A.G.2630.	2A.C.2788.	WC	19-XIX	cWW	cW-W	II	A|G-C	JI	S	S	LC	LC	SM	GGUAAGG	GCAGGAG	CUCCCAC	abAcdeDfgFEChBHiGI	1,2,3,4,5,6,7,8,-7,-6,-5,-4,-3,-2,-1,9,10,11,12,13,14,-13,15,16,17,18,19,20,21,22,23,-22,-21,-20,-19,-18,-17,-16,-15,-14,-12,-11,-10,-9,24,25,26,27,28,29,30,-8,-30,-29,-28,-27,-26,-25,-24,31,32,33,34,35,36,-23,-36,-35,-34,-33,-32,-31	31	23S Ribosomal RNA	23S Ribosomal RNA	23S Ribosomal RNA	thermus thermophilus	thermus thermophilus	thermus thermophilus		O2'(hydroxyl)-O3'[3.33]_O2'(hydroxyl)-O2'(hydroxyl)[2.80]_N3-O2'(hydroxyl)[2.59]	(2,2)	3	5	7	7	1	0	0	0	1
4y4o.cif1	intra	216	486	2A.A.2810.	2A.G.2631.	2A.C.2787.	WC	19-XIX	cWW	cW-W	I	A|G-C	JI	S	S	LC	LC	SM	GUAAGGA	CAGGAGG	CCUCCCA	abAcdeDfgFEChBHiGI	1,2,3,4,5,6,7,8,-7,-6,-5,-4,-3,-2,-1,9,10,11,12,13,14,-13,15,16,17,18,19,20,21,22,23,-22,-21,-20,-19,-18,-17,-16,-15,-14,-12,-11,-10,-9,24,25,26,27,28,29,30,-8,-30,-29,-28,-27,-26,-25,-24,31,32,33,34,35,36,-23,-36,-35,-34,-33,-32,-31	31	23S Ribosomal RNA	23S Ribosomal RNA	23S Ribosomal RNA	thermus thermophilus	thermus thermophilus	thermus thermophilus	N1-O2'(hydroxyl)[2.91]_N3-N2(amino)[3.19]	O2'(hydroxyl)-O2'(hydroxyl)[2.76]_O2'(hydroxyl)-O2(carbonyl)[3.35]	(2,2)	3	5	7	7	1	0	0	0	1	tSS
4y4o.cif1	intra	0	487	2A.A.2823.	2A.U.2047.	2A.A.2621.	WC	20-XX	cWW	cW-W	X	A|U-A	HC	S	S	LR	LR	SM	AAGACCA	CCGUGGC	GCCACGG	abAcdeDfgFEChBHiGI	1,2,3,4,5,6,7,8,-7,-6,-5,-4,-3,-2,-1,9,10,11,12,13,14,-13,15,16,17,18,19,20,21,22,23,-22,-21,-20,-19,-18,-17,-16,-15,-14,-12,-11,-10,-9,24,25,26,27,28,29,30,-8,-30,-29,-28,-27,-26,-25,-24,31,32,33,34,35,36,-23,-36,-35,-34,-33,-32,-31	24	23S Ribosomal RNA	23S Ribosomal RNA	23S Ribosomal RNA	thermus thermophilus	thermus thermophilus	thermus thermophilus	N6(amino)-O2(carbonyl)[2.81]_N1-O2'(hydroxyl)[2.57]		(1,1)	3	7	8	8	0	1	0	0	1	cWS
4y4o.cif1	intra	0	488	2A.A.2860.	2A.C.1708.	2A.G.1750.	WC	19-XIX	cWW	cW-W	I	A|C-G	HC	S	S	LR	LR	SM	GCGAGGC	GUGCUCC	GGAGCCG				23S Ribosomal RNA	23S Ribosomal RNA	23S Ribosomal RNA	thermus thermophilus	thermus thermophilus	thermus thermophilus	O2'(hydroxyl)-O2'(hydroxyl)[2.99]	N1-O2'(hydroxyl)[2.51]_N3-N2(amino)[3.14]	(1,1)	3	4	12	12	1	0	0	0	1		tWS
4y4o.cif1	intra	0	489	2A.A.2883.	2A.C.2816.	2A.G.2830.	WC	19-XIX	cWW	cW-W	I	A|C-G	JC	S	S	LC	LC	SM	CCAAUCG	ACCCGGG	CCCGGUG				23S Ribosomal RNA	23S Ribosomal RNA	23S Ribosomal RNA	thermus thermophilus	thermus thermophilus	thermus thermophilus	O2'(hydroxyl)-O2'(hydroxyl)[2.95]_O2'(hydroxyl)-O2(carbonyl)[2.52]	N1-O2'(hydroxyl)[2.61]_N3-N2(amino)[2.84]	(1,1)	3	3	5	5	0	0	0	0	0		tSS
4y4o.cif1	inter	189	428	2B.A.78.	2A.G.862.	2A.C.915.	WC	19-XIX	cWW	cW-W	X	A|G-C	IC	IC	IC	LR	LR	SM	GGUACUG	GUAGAGC	CUCCGAA				5S Ribosomal RNA	23S Ribosomal RNA	23S Ribosomal RNA	thermus thermophilus	thermus thermophilus	thermus thermophilus	O2'(hydroxyl)-O3'[3.00]_O2'(hydroxyl)-O2'(hydroxyl)[3.08]_N3-O2'(hydroxyl)[2.43]		(2,2)	5	7	4	5	0	0	0	0	0
4y4o.cif1	inter	207	465	2a.A.702.	2A.G.1846.	2A.C.1894.	WC	19-XIX	cWW	cW-W	X	A|G-C	IC	S	S	LR	LR	SM	CGCAGAU	CCGGAAG	GCCCCGG				16S Ribosomal RNA	23S Ribosomal RNA	23S Ribosomal RNA	thermus thermophilus	thermus thermophilus	thermus thermophilus	N1-N2(amino)[3.06]_N3-O2'(hydroxyl)[3.49]		(2,1)	4	7	5	5	0	0	0	0	0	cWS
4y4o.cif1	inter	217	490	2a.A.1418.	2A.G.1948.	2A.C.1958.	WC	19-XIX	cWW	cW-W	I	A|G-C	IC	S	S	LR	LR	SM	GGGAGCG	GUCGGGU	UUCCGAC				16S Ribosomal RNA	23S Ribosomal RNA	23S Ribosomal RNA	thermus thermophilus	thermus thermophilus	thermus thermophilus	N1-O2'(hydroxyl)[2.80]_N3-N2(amino)[3.30]	O2'(hydroxyl)-O2'(hydroxyl)[3.18]	(2,2)	4	2	5	5	1	0	0	0	1	tWS
4y4o.cif1	inter	217	490	2a.A.1483.	2A.C.1947.	2A.G.1959.	WC	19-XIX	cWW	cW-W	I	A|C-G	IC	S	S	LR	LR	SM	GUGACUG	UGUCGGG	UCCGACM				16S Ribosomal RNA	23S Ribosomal RNA	23S Ribosomal RNA	thermus thermophilus	thermus thermophilus	thermus thermophilus	O2'(hydroxyl)-O2'(hydroxyl)[2.75]_O2'(hydroxyl)-O2(carbonyl)[2.92]	N1-O2'(hydroxyl)[3.00]_N3-N2(amino)[3.46]	(2,2)	4	2	5	5	1	0	1	0	1		tSS
4yaz.cif1	intra	218	491	R.A.9.	R.G.8.	R.C.76.	WC	19-XIX	cWW	cW-W	X	A|G-C	JC	S	S	LC	LC	SM	ACGACAA	CACGACA	UGCCGAA				RNA (84-MER)	RNA (84-MER)	RNA (84-MER)	geobacter	geobacter	geobacter	N7-N2(amino)[3.16]		(4,2)	4	6	2	2	0	0	0	0	0	cHS	tH.
4yaz.cif1	intra	218	491	R.A.11.	R.G.8.	R.C.76.	WC	19-XIX	cWW	cW-W	X	A|G-C	JC	S	S	LC	LC	SM	GACAAUA	CACGACA	UGCCGAA				RNA (84-MER)	RNA (84-MER)	RNA (84-MER)	geobacter	geobacter	geobacter		N6(amino)-O2(carbonyl)[2.84]_N1-O2'(hydroxyl)[2.75]	(4,2)	4	6	2	2	0	1	0	0	1		cWS
4yaz.cif1	intra	0	492	R.A.29.	R.C.54.	R.G.62.	WC	19-XIX	cWW	cW-W	I	A|C-G	HC	S	S	LR	LR	SM	GCGAGGA	GGUCUCC	UGAGACA				RNA (84-MER)	RNA (84-MER)	RNA (84-MER)	geobacter	geobacter	geobacter	O2'(hydroxyl)-O2'(hydroxyl)[2.54]	N1-O2'(hydroxyl)[2.57]_N3-N2(amino)[3.00]	(1,1)	3	4	5	5	1	0	0	0	1		tWS	Hairpin	Stem
4yaz.cif1	intra	0	493	R.A.43.	R.U.16.	R.G.39.	WB	28-XXVIII	cWW	cW-W	I	A|U-G	JC	S	S	LC	LC	SM	GAAAGCC	UACUAAA	GGCGGAA				RNA (84-MER)	RNA (84-MER)	RNA (84-MER)	geobacter	geobacter	geobacter		O2'(hydroxyl)-N2(amino)[3.00]_N1-O2'(hydroxyl)[2.52]_N3-N2(amino)[2.83]	(1,1)	3	3	2	2	1	0	0	0	1		tSS
4yaz.cif1	intra	218	491	R.A.78.	R.C.7.	R.G.77.	WC	19-XIX	cWW	cW-W	X	A|C-G	IC	S	S	LC	LC	SM	CCGAAAU	ACACGAC	GCCGAAA				RNA (84-MER)	RNA (84-MER)	RNA (84-MER)	geobacter	geobacter	geobacter	N6(amino)-O2(carbonyl)[3.60]	N7-N2(amino)[3.04]	(4,2)	4	3	2	2	1	0	0	0	1	tH.	cHS
4yaz.cif1	intra	218	491	R.A.79.	R.C.7.	R.G.77.	WC	19-XIX	cWW	cW-W	X	A|C-G	IC	S	S	LC	LC	SM	CGAAAUA	ACACGAC	GCCGAAA				RNA (84-MER)	RNA (84-MER)	RNA (84-MER)	geobacter	geobacter	geobacter	N6(amino)-O2(carbonyl)[2.61]_N1-O2'(hydroxyl)[2.74]		(4,2)	4	3	2	2	1	1	0	0	1	cWS
4znp.cif1	inter	0	494	A.A.28.	B.G.26.	B.C.31.	WC	19-XIX	cWW	cW-W	X	A|G-C	HC	S	S	LR	LR	SM	GGGAAAC	GUGGGAA	AAACCAC				pfI Riboswitch	pfI Riboswitch	pfI Riboswitch	synthetic	synthetic	synthetic	N6(amino)*N2(amino)[3.14]	N6(amino)-O2(carbonyl)[2.83]_N1-O2'(hydroxyl)[2.66]	(1,1)	3	4	4	4	1	0	0	0	1	cH.	cWS
4znp.cif1	intra	0	495	A.A.30.	A.G.14.	A.C.65.	WC	19-XIX	cWW	cW-W	I	A|G-C	HC	S	S	LR	LR	SM	GAAACCA	ACUGGCG	CGCCUGG	abAcBC	1,2,-1,3,-2,-3	2	pfI Riboswitch	pfI Riboswitch	pfI Riboswitch	synthetic	synthetic	synthetic	O2'(hydroxyl)-O2'(hydroxyl)[2.59]_O2'(hydroxyl)-N3[3.10]_N3-N2(amino)[3.07]	N1-O2'(hydroxyl)[2.70]	(1,1)	3	4	5	5	1	1	0	0	1	cSS
4znp.cif1	inter	0	496	B.A.28.	A.G.26.	A.C.31.	WC	19-XIX	cWW	cW-W	X	A|G-C	HC	S	S	LR	LR	SM	GGGAAAC	GUGGGAA	AAACCAC				pfI Riboswitch	pfI Riboswitch	pfI Riboswitch	synthetic	synthetic	synthetic		N6(amino)-O2(carbonyl)[3.13]_N1-O2'(hydroxyl)[3.03]	(1,1)	3	4	4	4	1	0	0	0	1		cWS
5aox.cif1	intra	0	497	C.A.28.	C.C.3.	C.G.46.	WC	19-XIX	cWW	cW-W	I	A|C-G	HP	S	S	LR	LR	SM	GUAAUCC	NMGCCGG	GAGGCCG				ALU JO CONSENSUS RNA	ALU JO CONSENSUS RNA	ALU JO CONSENSUS RNA	synthetic	synthetic	synthetic	N1-O2'(hydroxyl)[2.68]		(1,1)	3	4	4	4	1	0	0	0	1
5btp.cif1	intra	0	498	B.A.34.	B.G.17.	B.C.69.	WC	19-XIX	cWW	cW-W	I	A|G-C	HC	S	S	LR	LR	SM	UUAACCA	ACUGACG	CGUCUGG	abAcBC	1,2,-1,3,-2,-3	2	RNA (62-MER)	RNA (62-MER)	RNA (62-MER)	synthetic	synthetic	synthetic	O2'(hydroxyl)-O2'(hydroxyl)[2.69]_O2'(hydroxyl)-N3[2.70]_N3-N2(amino)[3.07]	N1-O2'(hydroxyl)[2.70]	(1,1)	3	6	5	5	0	1	1	0	1	cSS
5btp.cif1	intra	0	499	B.A.43.	B.C.61.	B.G.73.	WC	19-XIX	cWW	cW-W	I	A|C-G	IP	S	S	LC	LC	SM	UGAAGUA	AUGCCGA	UGGGCGN	abAcBC	1,2,-1,3,-2,-3	3	RNA (62-MER)	RNA (62-MER)	RNA (62-MER)	synthetic	synthetic	synthetic	O2'(hydroxyl)-O2'(hydroxyl)[2.74]		(1,1)	3	5	3	3	0	1	0	0	1
5c45.cif1	inter	0	500	Y.A.63.	X.G.41.	Y.C.82.	WC	19-XIX	cWW	cW-W	I	A|G-C	JP	S	S	LC	LC	SM	UUGAUUU	AUAGUCC	AAACCGA	abAB	1,2,-1,-2	2	FMN Riboswitch	FMN Riboswitch	FMN Riboswitch	fusobacterium nucleatum	fusobacterium nucleatum	fusobacterium nucleatum	N1-O2'(hydroxyl)[2.76]_N3-N2(amino)[3.05]	O2'(hydroxyl)-O2'(hydroxyl)[2.85]_O2'(hydroxyl)-O2(carbonyl)[2.87]	(1,1)	3	3	2	2	0	0	0	0	0	tSS
5c45.cif1	inter	0	501	Y.A.104.	X.G.33.	X.C.46.	WC	19-XIX	cWW	cW-W	I	A|G-C	JI	S	S	LR	LR	SM	GAGAGAA	CCGGUGG	CCACGAA	abAB	1,2,-1,-2	1	FMN Riboswitch	FMN Riboswitch	FMN Riboswitch	fusobacterium nucleatum	fusobacterium nucleatum	fusobacterium nucleatum	N1-O2'(hydroxyl)[2.79]_N3-N2(amino)[2.84]	O2'(hydroxyl)-O2'(hydroxyl)[2.84]_O2'(hydroxyl)-O2(carbonyl)[3.07]	(1,1)	3	7	4	4	1	0	0	0	1	tSS
5d5l.cif1	intra	0	502	A.A.52.	A.C.22.	A.G.49.	WC	19-XIX	cWW	cW-W	X	A|C-G	IP	S	S	LC	LC	SM	GUUAUUA	CCACGAC	GUCGUUA	abAB	1,2,-1,-2	1	PreQ1-II riboswitch	PreQ1-II riboswitch	PreQ1-II riboswitch	lactobacillus rhamnosus	lactobacillus rhamnosus	lactobacillus rhamnosus	N6(amino)-O2(carbonyl)[3.50]		(1,1)	3	6	8	8	0	1	0	0	1	tW.
5d5l.cif1	intra	0	503	A.A.55.	A.U.40.	A.A.71.	WC	20-XX	cWW	cW-W	I	A|U-A	IP	S	S	LC	LC	SM	AUUACUG	CCUUUGA	ACAAAGG	abAB	1,2,-1,-2	2	PreQ1-II riboswitch	PreQ1-II riboswitch	PreQ1-II riboswitch	lactobacillus rhamnosus	lactobacillus rhamnosus	lactobacillus rhamnosus	O2'(hydroxyl)-O2'(hydroxyl)[2.84]	N1-O2'(hydroxyl)[2.62]	(1,1)	3	6	5	5	0	1	1	0	1
5d8h.cif1	intra	0	504	A.A.1179.	A.U.1175.	A.A.1183.	NA	n/a	cWW	cW-W	X	A|U-A	HC	HC	HC	SM	SM	SM	UAGAAGC	GGCUUAG	AGCAGCC				23S ribosomal RNA	23S ribosomal RNA	23S ribosomal RNA	methanocaldococcus jannaschii	methanocaldococcus jannaschii	methanocaldococcus jannaschii	O2'(hydroxyl)-N3(imino)[3.46]	O2'(hydroxyl)-N6(amino)[3.26]	(1,1)	1	9	9	9	0	0	0	0	0
5d8h.cif1	intra	219	505	A.A.1194.	A.G.1164.	A.C.1215.	WC	19-XIX	cWW	cW-W	II	A|G-C	JC	S	S	LC	LC	SM	UUUAAAG	GCGGGGA	CACCCGU				23S ribosomal RNA	23S ribosomal RNA	23S ribosomal RNA	methanocaldococcus jannaschii	methanocaldococcus jannaschii	methanocaldococcus jannaschii		O2'(hydroxyl)-O2'(hydroxyl)[2.99]_N3-O2'(hydroxyl)[2.48]	(2,2)	3	9	5	5	0	0	0	0	0	tW.	cSS
5d8h.cif1	intra	219	505	A.A.1195.	A.G.1165.	A.C.1214.	WC	19-XIX	cWW	cW-W	I	A|G-C	JC	S	S	LC	LC	SM	UUAAAGA	CGGGGAG	UCACCCG				23S ribosomal RNA	23S ribosomal RNA	23S ribosomal RNA	methanocaldococcus jannaschii	methanocaldococcus jannaschii	methanocaldococcus jannaschii	N1-O2'(hydroxyl)[2.67]_N3-N2(amino)[3.35]	O2'(hydroxyl)-O2'(hydroxyl)[2.62]_O2'(hydroxyl)-O2(carbonyl)[3.25]	(2,2)	3	9	5	5	0	0	0	0	0	tSS
5dm6.cif1	intra	220	506	X.A.14.	X.C.2044.	X.G.2624.	WC	19-XIX	cWW	cW-W	X	A|C-G	JI	S	S	LR	LR	SM	GUAAGGG	UACCCGU	ACGGGCG	abAcdeDfgFEChBHiGI	1,2,3,4,5,6,7,8,-7,-6,-5,-4,-3,-2,-1,9,10,11,12,13,14,-13,15,16,17,18,19,20,21,22,23,-22,-21,-20,-19,-18,-17,-16,-15,-14,-12,-11,-10,-9,24,25,26,27,28,29,30,31,-8,-31,-30,-29,-28,-27,-26,-25,-24,32,33,34,35,36,37,-23,-37,-36,-35,-34,-33,-32	24	23S ribosomal RNA	23S ribosomal RNA	23S ribosomal RNA	deinococcus radiodurans	deinococcus radiodurans	deinococcus radiodurans	N1-O2'(hydroxyl)[3.02]		(2,2)	4	6	8	8	1	0	0	0	1
5dm6.cif1	intra	0	507	X.A.52.	X.C.47.	X.G.157.	WC	19-XIX	cWW	cW-W	I	A|C-G	JC	S	S	LC	LC	SM	AUGAAGG	AGCCGAU	GAUGGGA				23S ribosomal RNA	23S ribosomal RNA	23S ribosomal RNA	deinococcus radiodurans	deinococcus radiodurans	deinococcus radiodurans	O2'(hydroxyl)-O2'(hydroxyl)[2.95]	N1-O2'(hydroxyl)[2.54]_N3-N2(amino)[3.33]	(1,1)	3	6	2	2	0	0	0	0	0
5dm6.cif1	intra	221	508	X.A.71.	X.C.57.	X.G.70.	WC	19-XIX	cWW	cW-W	X	A|C-G	HP	S	S	LC	LC	SM	GCGAAAA	GGACGCG	UGCGAAA	abAcBC	1,2,-1,3,4,-2,-4,-3	1	23S ribosomal RNA	23S ribosomal RNA	23S ribosomal RNA	deinococcus radiodurans	deinococcus radiodurans	deinococcus radiodurans		N1-N2(amino)[3.40]	(2,2)	3	5	3	3	1	0	0	0	1		cWS
5dm6.cif1	intra	221	508	X.A.73.	X.G.58.	X.C.69.	WC	19-XIX	cWW	cW-W	I	A|G-C	HP	S	S	LC	LC	SM	GAAAAGC	GACGCGA	CUGCGAA	abAcBC	1,2,-1,3,4,-2,-4,-3	1	23S ribosomal RNA	23S ribosomal RNA	23S ribosomal RNA	deinococcus radiodurans	deinococcus radiodurans	deinococcus radiodurans	N1-O2'(hydroxyl)[2.90]_N3-N2(amino)[2.99]	O2'(hydroxyl)-O2'(hydroxyl)[2.48]_O2'(hydroxyl)-O2(carbonyl)[2.94]	(2,2)	3	5	3	3	1	0	0	0	1	tSS		Multi Loop	Stem
5dm6.cif1	intra	0	509	X.A.103.	X.G.85.	X.C.98.	WC	19-XIX	cWW	cW-W	I	A|G-C	IC	S	S	LC	LC	SM	UUGACUC	CGAGCUG	ACGCUUU	abAcBC	1,2,-1,3,4,-2,-4,-3	4	23S ribosomal RNA	23S ribosomal RNA	23S ribosomal RNA	deinococcus radiodurans	deinococcus radiodurans	deinococcus radiodurans	N6(amino)-O2'(hydroxyl)[3.09]_N1-O2'(hydroxyl)[2.72]_N3-N2(amino)[3.01]		(1,1)	3	6	2	2	0	0	1	0	1	tSS
5dm6.cif1	intra	222	510	X.A.126.	X.G.54.	X.C.116.	WC	19-XIX	cWW	cW-W	II	A|G-C	HC	S	S	LR	LR	SM	GGAAACC	GAAGGAC	GUCCGAA				23S ribosomal RNA	23S ribosomal RNA	23S ribosomal RNA	deinococcus radiodurans	deinococcus radiodurans	deinococcus radiodurans	N1-N2(amino)[3.09]	O2'(hydroxyl)-O3'[2.96]_O2'(hydroxyl)-O2'(hydroxyl)[2.94]_N3-O2'(hydroxyl)[2.65]	(2,2)	3	4	3	3	1	0	0	0	1	tW.
5dm6.cif1	intra	222	510	X.A.127.	X.G.55.	X.C.115.	WC	19-XIX	cWW	cW-W	I	A|G-C	HC	S	S	LR	LR	SM	GAAACCC	AAGGACG	UGUCCGA				23S ribosomal RNA	23S ribosomal RNA	23S ribosomal RNA	deinococcus radiodurans	deinococcus radiodurans	deinococcus radiodurans	N1-O2'(hydroxyl)[2.66]_N3-N2(amino)[3.14]	O2'(hydroxyl)-O2'(hydroxyl)[2.65]_O2'(hydroxyl)-O2(carbonyl)[3.33]	(2,2)	3	4	3	3	1	0	0	0	1	tSS		Hairpin	Stem
5dm6.cif1	intra	223	511	X.A.161.	X.G.45.	X.C.433.	WC	19-XIX	cWW	cW-W	II	A|G-C	JC	S	S	LC	LC	SM	GGAACUC	GGAGCCG	AUACUCC	abAcdeDfgFEChBHiGI	1,2,3,4,5,6,7,8,-7,-6,-5,-4,-3,-2,-1,9,10,11,12,13,14,-13,15,16,17,18,19,20,21,22,23,-22,-21,-20,-19,-18,-17,-16,-15,-14,-12,-11,-10,-9,24,25,26,27,28,29,30,31,-8,-31,-30,-29,-28,-27,-26,-25,-24,32,33,34,35,36,37,-23,-37,-36,-35,-34,-33,-32	5	23S ribosomal RNA	23S ribosomal RNA	23S ribosomal RNA	deinococcus radiodurans	deinococcus radiodurans	deinococcus radiodurans	N1-N2(amino)[3.35]	O2'(hydroxyl)-O3'[3.01]_O2'(hydroxyl)-O2'(hydroxyl)[2.88]_N3-O2'(hydroxyl)[2.63]	(2,2)	5	4	2	2	1	0	0	0	1	tWW
5dm6.cif1	intra	224	512	X.A.165.D	X.C.678.	X.G.799.	WC	19-XIX	cWW	cW-W	X	A|C-G	HC	S	S	LR	LR	SM	GGGAACU	AAACCAG	CUGGAGA				23S ribosomal RNA	23S ribosomal RNA	23S ribosomal RNA	deinococcus radiodurans	deinococcus radiodurans	deinococcus radiodurans		N6(amino)-O2'(hydroxyl)[2.98]	(2,1)	3	19	6	6	1	0	0	0	1
5dm6.cif1	intra	224	512	X.A.165.E	X.C.678.	X.G.799.	WC	19-XIX	cWW	cW-W	I	A|C-G	HC	S	S	LR	LR	SM	GGAACUG	AAACCAG	CUGGAGA				23S ribosomal RNA	23S ribosomal RNA	23S ribosomal RNA	deinococcus radiodurans	deinococcus radiodurans	deinococcus radiodurans	O2'(hydroxyl)-O2'(hydroxyl)[2.82]_O2'(hydroxyl)-O2(carbonyl)[3.05]		(2,1)	3	19	6	6	1	0	0	0	1
5dm6.cif1	intra	0	513	X.A.168.	X.U.826.	X.G.831.	WB	28-XXVIII	cWW	cW-W	X	A|U-G	HC	S	S	LR	LR	SM	UGAAACA	GUAUUGA	GAGGUAC				23S ribosomal RNA	23S ribosomal RNA	23S ribosomal RNA	deinococcus radiodurans	deinococcus radiodurans	deinococcus radiodurans		N6(amino)-N3[3.41]_N1-N2(amino)[2.83]	(1,1)	3	19	5	5	1	1	0	0	1		tWS
5dm6.cif1	intra	225	514	X.A.171.	X.C.2078.	X.G.2242.	WC	19-XIX	cWW	cW-W	X	A|C-G	HC	S	S	LR	LR	SM	AACAUCU	UUACUAU	GUAGUUU				23S ribosomal RNA	23S ribosomal RNA	23S ribosomal RNA	deinococcus radiodurans	deinococcus radiodurans	deinococcus radiodurans	N1-O2'(hydroxyl)[3.17]	OP1-O2'(hydroxyl)[3.14]	(2,2)	4	19	5	5	0	1	0	0	1
5dm6.cif1	intra	0	515	X.A.194.	X.G.196.	X.C.203.	WC	19-XIX	cWW	cW-W	X	A|G-C	JC	S	S	LC	LC	SM	AGAAAGA	AAAGAGA	AUUCGAU				23S ribosomal RNA	23S ribosomal RNA	23S ribosomal RNA	deinococcus radiodurans	deinococcus radiodurans	deinococcus radiodurans	O2'(hydroxyl)-O4'[2.88]	N6(amino)-O2(carbonyl)[3.19]	(1,1)	3	11	2	2	1	0	0	0	1		tHW
5dm6.cif1	intra	0	516	X.A.199.	X.G.410.	X.C.417.	WC	19-XIX	cWW	cW-W	X	A|G-C	HC	S	S	LR	LR	SM	GAGAAUU	CGCGGAC	CACCGCG	abAcdeDfgFEChBHiGI	1,2,3,4,5,6,7,8,-7,-6,-5,-4,-3,-2,-1,9,10,11,12,13,14,-13,15,16,17,18,19,20,21,22,23,-22,-21,-20,-19,-18,-17,-16,-15,-14,-12,-11,-10,-9,24,25,26,27,28,29,30,31,-8,-31,-30,-29,-28,-27,-26,-25,-24,32,33,34,35,36,37,-23,-37,-36,-35,-34,-33,-32	7	23S ribosomal RNA	23S ribosomal RNA	23S ribosomal RNA	deinococcus radiodurans	deinococcus radiodurans	deinococcus radiodurans	N6(amino)-O2'(hydroxyl)[3.12]_N6(amino)-N3[3.26]_N1-N2(amino)[3.09]		(1,1)	3	4	5	5	1	0	0	0	1	tWS
5dm6.cif1	intra	0	517	X.A.223.	X.G.166.	X.C.173.	WC	19-XIX	cWW	cW-W	I	A|G-C	HC	HC	HC	LR	LR	SM	GCGAGCG	ACUGAAA	CAUCUCA				23S ribosomal RNA	23S ribosomal RNA	23S ribosomal RNA	deinococcus radiodurans	deinococcus radiodurans	deinococcus radiodurans	O2'(hydroxyl)-O2'(hydroxyl)[3.26]_N3-N2(amino)[3.55]	N1-O2'(hydroxyl)[2.62]	(1,1)	2	5	19	19	1	0	0	0	1
5dm6.cif1	intra	226	518	X.A.299.	X.C.319.	X.G.323.	WC	19-XIX	cWW	cW-W	II	A|C-G	JI	HP	HP	LR	LR	SM	CCGAAGU	CACCUCA	UCAGAAG				23S ribosomal RNA	23S ribosomal RNA	23S ribosomal RNA	deinococcus radiodurans	deinococcus radiodurans	deinococcus radiodurans	O2'(hydroxyl)-O2'(hydroxyl)[2.72]_N3-O2'(hydroxyl)[2.48]		(2,2)	4	3	6	6	0	0	0	0	0
5dm6.cif1	intra	226	518	X.A.300.	X.C.318.	X.G.333.	WC	19-XIX	cWW	cW-W	I	A|C-G	JI	S	S	LC	LC	SM	CGAAGUG	ACACCUC	AGAGUCC	abAB	1,2,-1,-2	1	23S ribosomal RNA	23S ribosomal RNA	23S ribosomal RNA	deinococcus radiodurans	deinococcus radiodurans	deinococcus radiodurans	O2'(hydroxyl)-O2'(hydroxyl)[3.01]_O2'(hydroxyl)-O2(carbonyl)[2.69]	N1-O2'(hydroxyl)[3.27]_N3-N2(amino)[2.73]	(2,2)	4	3	2	2	0	0	0	0	0		tSS
5dm6.cif1	intra	227	519	X.A.345.	X.G.80.	X.C.106.	WC	19-XIX	cWW	cW-W	X	A|G-C	IC	S	S	LR	LR	SM	GCGAACG	CCCGACG	ACUCGGG	abAcBC	1,2,-1,3,4,-2,-4,-3	3	23S ribosomal RNA	23S ribosomal RNA	23S ribosomal RNA	deinococcus radiodurans	deinococcus radiodurans	deinococcus radiodurans	N3-O2'(hydroxyl)[2.97]		(2,2)	3	4	6	6	1	0	0	0	1
5dm6.cif1	intra	227	519	X.A.346.	X.C.79.	X.G.107.	WC	19-XIX	cWW	cW-W	X	A|C-G	IC	S	S	LR	LR	SM	CGAACGA	CCCCGAC	CUCGGGG	abAcBC	1,2,-1,3,4,-2,-4,-3	3	23S ribosomal RNA	23S ribosomal RNA	23S ribosomal RNA	deinococcus radiodurans	deinococcus radiodurans	deinococcus radiodurans	N3-O2'(hydroxyl)[2.57]	N1-N2(amino)[3.22]	(2,2)	3	4	6	6	0	0	0	0	0		tW.
5dm6.cif1	intra	223	511	X.A.432.	X.C.162.	X.G.186.	WC	19-XIX	cWW	cW-W	II	A|C-G	JCJP	JC	JC	SM	SM	SM	AAUACUC	GAACUCA	GAAGGAG				23S ribosomal RNA	23S ribosomal RNA	23S ribosomal RNA	deinococcus radiodurans	deinococcus radiodurans	deinococcus radiodurans	O2'(hydroxyl)-O3'[3.37]_O2'(hydroxyl)-O2'(hydroxyl)[2.84]_N3-O2'(hydroxyl)[2.52]		(2,2)	5	6	4	11	0	1	0	0	1	cWS
5dm6.cif1	intra	0	520	X.A.443.	X.C.1200.	X.G.1245.	WC	19-XIX	cWW	cW-W	I	A|C-G	BCJP	S	S	LR	LR	SM	GUGACCG	GUUCAGU	ACUGAAG				23S ribosomal RNA	23S ribosomal RNA	23S ribosomal RNA	deinococcus radiodurans	deinococcus radiodurans	deinococcus radiodurans	O2'(hydroxyl)-O2'(hydroxyl)[2.62]_O2'(hydroxyl)-O2(carbonyl)[3.25]	N1-O2'(hydroxyl)[2.56]_N3-N2(amino)[2.82]	(1,1)	3	1	7	7	1	0	1	0	1		tSS	Interior Loop	Stem
5dm6.cif1	intra	0	521	X.A.449.	X.G.35.	X.C.445.	WC	19-XIX	cWW	cW-W	II	A|G-C	JCJP	S	S	LC	LC	SM	GAUAGCG	CCUGGCG	GACCGAU	abAcdeDfgFEChBHiGI	1,2,3,4,5,6,7,8,-7,-6,-5,-4,-3,-2,-1,9,10,11,12,13,14,-13,15,16,17,18,19,20,21,22,23,-22,-21,-20,-19,-18,-17,-16,-15,-14,-12,-11,-10,-9,24,25,26,27,28,29,30,31,-8,-31,-30,-29,-28,-27,-26,-25,-24,32,33,34,35,36,37,-23,-37,-36,-35,-34,-33,-32	3	23S ribosomal RNA	23S ribosomal RNA	23S ribosomal RNA	deinococcus radiodurans	deinococcus radiodurans	deinococcus radiodurans	N1-N2(amino)[3.48]	O2'(hydroxyl)-O2'(hydroxyl)[2.99]_N3-O2'(hydroxyl)[2.71]	(1,1)	3	14	2	2	0	0	0	0	0	tW.	cWS
5dm6.cif1	intra	0	522	X.A.466.	X.G.682.	X.C.795.	WC	19-XIX	cWW	cW-W	I	A|G-C	HC	S	S	LR	LR	SM	GUGAGGG	CAGGUGA	GAACCUG				23S ribosomal RNA	23S ribosomal RNA	23S ribosomal RNA	deinococcus radiodurans	deinococcus radiodurans	deinococcus radiodurans	N3-N2(amino)[3.25]	N6(amino)-O2'(hydroxyl)[3.11]_N1-O2'(hydroxyl)[2.41]	(1,1)	3	4	6	6	1	0	0	0	1	cSS	tWS	Hairpin	Stem
5dm6.cif1	intra	228	523	X.A.514.	X.C.581.	X.G.1259.	WC	19-XIX	cWW	cW-W	II	A|C-G	JCJP	S	S	LC	LC	SM	UGAAACC	AGCCGGC	GCCGGCA				23S ribosomal RNA	23S ribosomal RNA	23S ribosomal RNA	deinococcus radiodurans	deinococcus radiodurans	deinococcus radiodurans	O2'(hydroxyl)-O2'(hydroxyl)[2.59]_N3-O2'(hydroxyl)[2.89]		(2,2)	3	19	6	6	1	0	0	0	1	cSS
5dm6.cif1	intra	228	523	X.A.515.	X.C.580.	X.G.1260.	WC	19-XIX	cWW	cW-W	I	A|C-G	JCJP	S	S	LC	LC	SM	GAAACCG	GAGCCGG	CCGGCAU				23S ribosomal RNA	23S ribosomal RNA	23S ribosomal RNA	deinococcus radiodurans	deinococcus radiodurans	deinococcus radiodurans	O3'-O2'(hydroxyl)[3.14]_O2'(hydroxyl)-O2'(hydroxyl)[2.51]_O2'(hydroxyl)-O2(carbonyl)[3.17]	N1-O2'(hydroxyl)[2.61]_N3-N2(amino)[2.89]	(2,2)	3	19	6	6	1	0	0	0	1		tSS	Multi Loop	Stem
5dm6.cif1	intra	220	506	X.A.526.	X.C.2043.	X.G.2625.	WC	19-XIX	cWW	cW-W	X	A|C-G	JP	S	S	LC	LC	SM	CUUACAA	CUACCCG	CGGGCGC	abAcdeDfgFEChBHiGI	1,2,3,4,5,6,7,8,-7,-6,-5,-4,-3,-2,-1,9,10,11,12,13,14,-13,15,16,17,18,19,20,21,22,23,-22,-21,-20,-19,-18,-17,-16,-15,-14,-12,-11,-10,-9,24,25,26,27,28,29,30,31,-8,-31,-30,-29,-28,-27,-26,-25,-24,32,33,34,35,36,37,-23,-37,-36,-35,-34,-33,-32	24	23S ribosomal RNA	23S ribosomal RNA	23S ribosomal RNA	deinococcus radiodurans	deinococcus radiodurans	deinococcus radiodurans	O3'-O2'(hydroxyl)[3.21]_O2'(hydroxyl)-O2'(hydroxyl)[3.15]_O2'(hydroxyl)-O2(carbonyl)[2.32]	N6(amino)-O2'(hydroxyl)[3.16]_N1-O2'(hydroxyl)[2.69]_N3-N2(amino)[3.42]	(2,2)	4	7	8	8	0	0	1	0	1
5dm6.cif1	intra	229	524	X.A.532.	X.A.2019.	X.G.2035.	IM	08-VIII	cWW	cW-W	X	A|A-G	JP	JP	HC	SM	LR	LR	AGCAGUC	UUGAAUU	GAUGCGG				23S ribosomal RNA	23S ribosomal RNA	23S ribosomal RNA	deinococcus radiodurans	deinococcus radiodurans	deinococcus radiodurans		N1-N2(amino)[2.97]	(1,2)	3	7	11	8	0	1	0	0	1		cWW
5dm6.cif1	intra	229	524	X.A.532.	X.A.2020.	X.U.2034.	WC	20-XX	cWW	cW-W	X	A|A-U	JP	JP	HC	SM	LR	LR	AGCAGUC	UGAAUUG	AGAUGCG				23S ribosomal RNA	23S ribosomal RNA	23S ribosomal RNA	deinococcus radiodurans	deinococcus radiodurans	deinococcus radiodurans	N6(amino)-N3[3.20]		(1,2)	3	7	11	8	0	1	0	0	1	cWS
5dm6.cif1	intra	230	525	X.A.586.	X.C.671.	X.G.809.	WC	19-XIX	cWW	cW-W	I	A|C-G	JC	S	S	LC	LC	SM	GCGACUU	AGACUCG	CUAGUUC				23S ribosomal RNA	23S ribosomal RNA	23S ribosomal RNA	deinococcus radiodurans	deinococcus radiodurans	deinococcus radiodurans	O2'(hydroxyl)-O2(carbonyl)[3.17]	N1-O2'(hydroxyl)[2.46]_N3-N2(amino)[3.30]	(2,2)	4	4	2	2	1	0	0	0	1		tWS
5dm6.cif1	intra	231	526	X.A.607.	X.C.209.	X.G.232.	WC	19-XIX	cWW	cW-W	X	A|C-G	IC	S	S	LR	LR	SM	CUUAAGU	UUCCGUU	CCCGGAU				23S ribosomal RNA	23S ribosomal RNA	23S ribosomal RNA	deinococcus radiodurans	deinococcus radiodurans	deinococcus radiodurans		N1-O2'(hydroxyl)[3.28]	(3,2)	4	3	4	4	0	0	0	0	0
5dm6.cif1	intra	231	526	X.A.608.	X.C.209.	X.G.232.	WC	19-XIX	cWW	cW-W	I	A|C-G	IC	S	S	LR	LR	SM	UUAAGUU	UUCCGUU	CCCGGAU				23S ribosomal RNA	23S ribosomal RNA	23S ribosomal RNA	deinococcus radiodurans	deinococcus radiodurans	deinococcus radiodurans	O3'-O2'(hydroxyl)[3.18]_O2'(hydroxyl)-O2'(hydroxyl)[2.62]_O2'(hydroxyl)-O2(carbonyl)[2.88]	N3-N2(amino)[2.94]	(3,2)	4	3	4	4	0	0	0	0	0		tSS	Interior Loop	Stem
5dm6.cif1	intra	231	526	X.A.621.	X.G.210.	X.C.231.	WC	19-XIX	cWW	cW-W	I	A|G-C	IC	S	S	LR	LR	SM	CGGAGGC	UCCGUUA	ACCCGGA				23S ribosomal RNA	23S ribosomal RNA	23S ribosomal RNA	deinococcus radiodurans	deinococcus radiodurans	deinococcus radiodurans	N3-N2(amino)[3.49]	O3'-O2'(hydroxyl)[2.88]_O2'(hydroxyl)-O2'(hydroxyl)[3.05]_O2'(hydroxyl)-O2(carbonyl)[2.34]	(3,2)	4	3	4	4	0	0	0	0	0	tSS		Interior Loop	Interior Loop
5dm6.cif1	intra	0	527	X.A.631.	X.U.2401.	X.G.2415.	WB	28-XXVIII	cWW	cW-W	X	A|U-G	HC	S	S	LR	LR	SM	GCGAAAG	UGGUACC	AGGGCCA	abAcdeDfgFEChBHiGI	1,2,3,4,5,6,7,8,-7,-6,-5,-4,-3,-2,-1,9,10,11,12,13,14,-13,15,16,17,18,19,20,21,22,23,-22,-21,-20,-19,-18,-17,-16,-15,-14,-12,-11,-10,-9,24,25,26,27,28,29,30,31,-8,-31,-30,-29,-28,-27,-26,-25,-24,32,33,34,35,36,37,-23,-37,-36,-35,-34,-33,-32	30	23S ribosomal RNA	23S ribosomal RNA	23S ribosomal RNA	deinococcus radiodurans	deinococcus radiodurans	deinococcus radiodurans		N3-O2'(hydroxyl)[2.84]	(1,1)	3	4	4	4	1	0	0	0	1		cWS
5dm6.cif1	intra	232	528	X.A.643.	X.U.2348.	X.A.2369.	WC	20-XX	cWW	cW-W	X	A|U-A	HC	S	S	LR	LR	SM	CCGAAUA	GACUGCG	AGCAGGG				23S ribosomal RNA	23S ribosomal RNA	23S ribosomal RNA	deinococcus radiodurans	deinococcus radiodurans	deinococcus radiodurans		N1-O2'(hydroxyl)[3.09]	(2,2)	3	6	4	4	0	1	0	0	1
5dm6.cif1	intra	232	528	X.A.644.	X.G.2349.	X.C.2368.	WC	19-XIX	cWW	cW-W	X	A|G-C	HC	S	S	LR	LR	SM	CGAAUAG	ACUGCGA	GAGCAGG				23S ribosomal RNA	23S ribosomal RNA	23S ribosomal RNA	deinococcus radiodurans	deinococcus radiodurans	deinococcus radiodurans	N6(amino)-O2'(hydroxyl)[2.98]		(2,2)	3	6	4	4	0	1	0	0	1	tWS
5dm6.cif1	intra	0	529	X.A.675.	X.G.2067.	X.C.2443.	WC	19-XIX	cWW	cW-W	II	A|G-C	IC	S	S	LR	LR	SM	UCGAAAC	CCCGUGG	CCCCGGG	abAcdeDfgFEChBHiGI	1,2,3,4,5,6,7,8,-7,-6,-5,-4,-3,-2,-1,9,10,11,12,13,14,-13,15,16,17,18,19,20,21,22,23,-22,-21,-20,-19,-18,-17,-16,-15,-14,-12,-11,-10,-9,24,25,26,27,28,29,30,31,-8,-31,-30,-29,-28,-27,-26,-25,-24,32,33,34,35,36,37,-23,-37,-36,-35,-34,-33,-32	26	23S ribosomal RNA	23S ribosomal RNA	23S ribosomal RNA	deinococcus radiodurans	deinococcus radiodurans	deinococcus radiodurans		O2'(hydroxyl)-O3'[3.53]_N3-O2'(hydroxyl)[2.76]	(1,1)	3	5	4	4	1	0	0	0	1
5dm6.cif1	intra	0	530	X.A.685.	X.G.778.	X.C.786.	WC	19-XIX	cWW	cW-W	X	A|G-C	JC	S	S	LC	LC	SM	GUGAGCU	GGAGUGA	AAGCUAA				23S ribosomal RNA	23S ribosomal RNA	23S ribosomal RNA	deinococcus radiodurans	deinococcus radiodurans	deinococcus radiodurans	N6(amino)-N3[3.11]_N1-N2(amino)[3.24]		(1,1)	3	5	3	3	1	0	0	0	1	tWS
5dm6.cif1	intra	233	531	X.A.693.	X.A.1353.	X.U.1379.	WC	20-XX	cWW	cW-W	I	A|A-U	S	IC	IC	LR	LR	SM	AGCAUGA	CCUAAGG	CGAUGGA				23S ribosomal RNA	23S ribosomal RNA	23S ribosomal RNA	deinococcus radiodurans	deinococcus radiodurans	deinococcus radiodurans	O2'(hydroxyl)-O2'(hydroxyl)[2.70]_O2'(hydroxyl)-N3[2.86]		(3,3)	4	9	3	3	0	1	0	0	1
5dm6.cif1	intra	0	532	X.A.749.	X.U.744.	X.A.753.	WC	20-XX	cWW	cW-W	X	A|U-A	HC	S	S	LC	LC	SM	CUGAAAC	GCCUGCU	AACAGUC				23S ribosomal RNA	23S ribosomal RNA	23S ribosomal RNA	deinococcus radiodurans	deinococcus radiodurans	deinococcus radiodurans		N6(amino)-N3[3.15]_N1-O2'(hydroxyl)[2.67]	(1,1)	3	8	2	2	1	0	0	0	1		cWS
5dm6.cif1	intra	0	533	X.A.781.	X.G.1776.	X.C.1788.	WC	19-XIX	cWW	cW-W	I	A|G-C	HC	JC	JC	LR	LR	SM	GUGAAAA	ACUGUUU	AAUCACA				23S ribosomal RNA	23S ribosomal RNA	23S ribosomal RNA	deinococcus radiodurans	deinococcus radiodurans	deinococcus radiodurans	N1-O2'(hydroxyl)[2.87]_N3-N2(amino)[2.79]	O2'(hydroxyl)-O2'(hydroxyl)[2.43]_O2'(hydroxyl)-O2(carbonyl)[2.96]	(1,1)	2	5	19	19	1	0	0	0	1	tWS		Hairpin	Multi Loop
5dm6.cif1	intra	0	534	X.A.819.	X.C.837.	X.G.942.	WC	19-XIX	cWW	cW-W	I	A|C-G	JC	S	S	LC	LC	SM	CCGAAAU	CAGCCUC	GGAGUGA				23S ribosomal RNA	23S ribosomal RNA	23S ribosomal RNA	deinococcus radiodurans	deinococcus radiodurans	deinococcus radiodurans	O2'(hydroxyl)-O2'(hydroxyl)[2.97]	N3-N2(amino)[3.06]	(1,1)	3	4	2	2	1	0	0	0	1		tSS
5dm6.cif1	intra	0	535	X.A.866.	X.G.864.	X.C.912.	WC	19-XIX	cWW	cW-W	X	A|G-C	IC	S	S	LC	LC	SM	AGCACUC	AGAGCAC	AAACUCC				23S ribosomal RNA	23S ribosomal RNA	23S ribosomal RNA	deinococcus radiodurans	deinococcus radiodurans	deinococcus radiodurans	N6(amino)-O2'(hydroxyl)[2.64]_N6(amino)-N3[3.25]_N1-N2(amino)[3.37]		(1,1)	3	4	2	2	0	1	0	0	1	tWS
5dm6.cif1	intra	234	536	X.A.910.	X.C.2264.	X.G.2276.	WC	19-XIX	cWW	cW-W	II	A|C-G	IC	S	S	LR	LR	SM	UGAAACU	CUCCCAA	AACGGAG				23S ribosomal RNA	23S ribosomal RNA	23S ribosomal RNA	deinococcus radiodurans	deinococcus radiodurans	deinococcus radiodurans	O2'(hydroxyl)-O3'[2.98]_O2'(hydroxyl)-O2'(hydroxyl)[2.41]_N3-O2'(hydroxyl)[2.88]		(2,2)	3	3	6	6	1	0	0	0	1
5dm6.cif1	intra	234	536	X.A.911.	X.C.2263.	X.G.2277.	WC	19-XIX	cWW	cW-W	I	A|C-G	IC	S	S	LR	LR	SM	GAAACUC	CCUCCCA	ACGGAGG				23S ribosomal RNA	23S ribosomal RNA	23S ribosomal RNA	deinococcus radiodurans	deinococcus radiodurans	deinococcus radiodurans	O2'(hydroxyl)-O2'(hydroxyl)[3.08]	N1-O2'(hydroxyl)[2.88]_N3-N2(amino)[3.41]	(2,2)	3	3	6	6	1	0	0	0	1		tWS
5dm6.cif1	intra	235	537	X.A.959.	X.U.2457.	X.G.2494.	WB	28-XXVIII	cWW	cW-W	II	A|U-G	HC	S	S	LR	LR	SM	GCUAACU	GGCUGAU	UUUGGCA				23S ribosomal RNA	23S ribosomal RNA	23S ribosomal RNA	deinococcus radiodurans	deinococcus radiodurans	deinococcus radiodurans	O2'(hydroxyl)-O3'[3.07]_O2'(hydroxyl)-O2'(hydroxyl)[2.94]_N3-O2'(hydroxyl)[2.69]		(2,2)	3	6	3	3	0	0	1	0	1	cSS
5dm6.cif1	intra	235	537	X.A.960.	X.C.2456.	X.G.2495.	WC	19-XIX	cWW	cW-W	I	A|C-G	HC	S	S	LR	LR	SM	CUAACUU	AGGCUGA	UUGGCAC				23S ribosomal RNA	23S ribosomal RNA	23S ribosomal RNA	deinococcus radiodurans	deinococcus radiodurans	deinococcus radiodurans	O2'(hydroxyl)-O2'(hydroxyl)[2.84]	N1-O2'(hydroxyl)[3.00]_N3-N2(amino)[3.10]	(2,2)	3	6	3	3	0	0	1	0	1		tSS	Hairpin	Stem
5dm6.cif1	intra	236	538	X.A.980.	X.U.2026.	X.G.2037.	WB	28-XXVIII	cWW	cW-W	X	A|U-G	HC	S	S	LR	LR	SM	GGAAACA	GGCUGUA	UGCGGCC				23S ribosomal RNA	23S ribosomal RNA	23S ribosomal RNA	deinococcus radiodurans	deinococcus radiodurans	deinococcus radiodurans		O2'(hydroxyl)-O2'(hydroxyl)[3.08]_N1-N2(amino)[3.30]_N3-O2'(hydroxyl)[2.88]	(3,4)	4	6	5	5	1	1	0	0	1		cWS
5dm6.cif1	intra	236	538	X.A.981.	X.G.2027.	X.C.2036.	WC	19-XIX	cWW	cW-W	I	A|G-C	HC	S	S	LR	LR	SM	GAAACAA	GCUGUAA	AUGCGGC				23S ribosomal RNA	23S ribosomal RNA	23S ribosomal RNA	deinococcus radiodurans	deinococcus radiodurans	deinococcus radiodurans	N1-O2'(hydroxyl)[2.41]_N3-N2(amino)[2.81]	O2'(hydroxyl)-O2'(hydroxyl)[3.34]	(3,4)	4	6	5	5	1	1	0	0	1	tWS		Hairpin	Stem
5dm6.cif1	intra	237	539	X.A.983.	X.G.946.	X.C.971.	WC	19-XIX	cWW	cW-W	II	A|G-C	HC	S	S	LR	LR	SM	AACAACC	UGAGGCU	AGCCGAG				23S ribosomal RNA	23S ribosomal RNA	23S ribosomal RNA	deinococcus radiodurans	deinococcus radiodurans	deinococcus radiodurans		O2'(hydroxyl)-O2'(hydroxyl)[2.88]_N3-O2'(hydroxyl)[3.04]	(2,2)	3	6	7	7	0	1	0	0	1
5dm6.cif1	intra	237	539	X.A.984.	X.G.947.	X.C.970.	WC	19-XIX	cWW	cW-W	I	A|G-C	HC	S	S	LR	LR	SM	ACAACCC	GAGGCUG	UAGCCGA				23S ribosomal RNA	23S ribosomal RNA	23S ribosomal RNA	deinococcus radiodurans	deinococcus radiodurans	deinococcus radiodurans	N1-O2'(hydroxyl)[2.49]_N3-N2(amino)[3.40]	O3'-O2'(hydroxyl)[3.54]	(2,2)	3	6	7	7	0	0	0	0	0	tWS
5dm6.cif1	intra	238	540	X.A.1000.	X.G.976.	X.C.987.	WC	19-XIX	cWW	cW-W	II	A|G-C	IC	S	S	LR	LR	SM	GCUAAGG	AGAGGGA	ACCCAGA				23S ribosomal RNA	23S ribosomal RNA	23S ribosomal RNA	deinococcus radiodurans	deinococcus radiodurans	deinococcus radiodurans		O2'(hydroxyl)-O3'[3.19]_O2'(hydroxyl)-O2'(hydroxyl)[2.59]_N3-O2'(hydroxyl)[2.59]	(2,2)	3	3	3	3	0	0	0	0	0
5dm6.cif1	intra	238	540	X.A.1001.	X.G.977.	X.C.986.	WC	19-XIX	cWW	cW-W	I	A|G-C	IC	S	S	LR	LR	SM	CUAAGGU	GAGGGAA	AACCCAG				23S ribosomal RNA	23S ribosomal RNA	23S ribosomal RNA	deinococcus radiodurans	deinococcus radiodurans	deinococcus radiodurans	N1-O2'(hydroxyl)[3.07]_N3-N2(amino)[2.90]	O2'(hydroxyl)-O2'(hydroxyl)[2.49]_O2'(hydroxyl)-O2(carbonyl)[3.21]	(2,2)	3	3	3	3	0	0	0	0	0	tSS		Interior Loop	Stem
5dm6.cif1	intra	239	541	X.A.1009.	X.G.1002.	X.C.1153.	WC	19-XIX	cWW	cW-W	II	A|G-C	IP	S	S	LR	LR	SM	CCUAAAU	UAAGGUC	UACCGAA				23S ribosomal RNA	23S ribosomal RNA	23S ribosomal RNA	deinococcus radiodurans	deinococcus radiodurans	deinococcus radiodurans		O2'(hydroxyl)-O2'(hydroxyl)[2.83]_N3-O2'(hydroxyl)[3.19]	(2,2)	3	5	3	3	0	0	0	0	0
5dm6.cif1	intra	239	541	X.A.1010.	X.G.1003.	X.C.1152.	WC	19-XIX	cWW	cW-W	I	A|G-C	IP	S	S	LR	LR	SM	CUAAAUG	AAGGUCC	CUACCGA				23S ribosomal RNA	23S ribosomal RNA	23S ribosomal RNA	deinococcus radiodurans	deinococcus radiodurans	deinococcus radiodurans	N1-O2'(hydroxyl)[2.43]_N3-N2(amino)[3.30]	O2'(hydroxyl)-O2'(hydroxyl)[3.01]_O2'(hydroxyl)-O2(carbonyl)[2.72]	(2,2)	3	5	3	3	0	0	0	0	0	tSS
5dm6.cif1	intra	240	542	X.A.1028.	X.C.2464.	X.G.2486.	WC	19-XIX	cWW	cW-W	II	A|C-G	IP	S	S	LR	LR	SM	GUUAAGG	CUCCCCC	CGGGGAG				23S ribosomal RNA	23S ribosomal RNA	23S ribosomal RNA	deinococcus radiodurans	deinococcus radiodurans	deinococcus radiodurans		O2'(hydroxyl)-O3'[2.87]_O2'(hydroxyl)-O2'(hydroxyl)[2.98]_N3-O2'(hydroxyl)[2.69]	(3,3)	4	11	6	6	0	0	0	0	0
5dm6.cif1	intra	240	542	X.A.1029.	X.C.2465.	X.G.2485.	WC	19-XIX	cWW	cW-W	I	A|C-G	IP	S	S	LR	LR	SM	UUAAGGA	UCCCCCG	GCGGGGA				23S ribosomal RNA	23S ribosomal RNA	23S ribosomal RNA	deinococcus radiodurans	deinococcus radiodurans	deinococcus radiodurans	N1-O2'(hydroxyl)[2.95]	N3-N2(amino)[3.52]	(3,3)	4	11	6	6	0	0	0	0	0	tWS	cSS	Interior Loop	Stem
5dm6.cif1	intra	0	543	X.A.1048.	X.C.1043.	X.G.1112.	WC	19-XIX	cWW	cW-W	X	A|C-G	IC	IC	IC	SM	SM	SM	UAGACAG	UCGCAUA	CGAGUGA				23S ribosomal RNA	23S ribosomal RNA	23S ribosomal RNA	deinococcus radiodurans	deinococcus radiodurans	deinococcus radiodurans	O2'(hydroxyl)-O2'(hydroxyl)[2.71]	N1-O2'(hydroxyl)[2.82]	(1,1)	2	9	9	5	0	0	0	0	0
5dm6.cif1	intra	241	544	X.A.1084.	X.A.1054.	X.U.1105.	WC	20-XX	cWW	cW-W	X	A|A-U	JC	S	S	LC	LC	SM	UUCAAAG	GCCAGGA	CACUGGU				23S ribosomal RNA	23S ribosomal RNA	23S ribosomal RNA	deinococcus radiodurans	deinococcus radiodurans	deinococcus radiodurans		N3-O2'(hydroxyl)[2.56]	(2,2)	3	9	5	5	0	0	0	0	0		cWS
5dm6.cif1	intra	241	544	X.A.1085.	X.G.1055.	X.C.1104.	WC	19-XIX	cWW	cW-W	I	A|G-C	JC	S	S	LC	LC	SM	UCAAAGA	CCAGGAG	UCACUGG				23S ribosomal RNA	23S ribosomal RNA	23S ribosomal RNA	deinococcus radiodurans	deinococcus radiodurans	deinococcus radiodurans	N3-N2(amino)[3.26]	O2'(hydroxyl)-O2(carbonyl)[2.34]	(2,2)	3	9	5	5	0	0	0	0	0	tSS
5dm6.cif1	intra	240	542	X.A.1127.	X.C.2463.	X.G.2487.	WC	19-XIX	cWW	cW-W	X	A|C-G	IP	S	S	LR	LR	SM	CGAAAAU	UCUCCCC	GGGGAGG				23S ribosomal RNA	23S ribosomal RNA	23S ribosomal RNA	deinococcus radiodurans	deinococcus radiodurans	deinococcus radiodurans	N6(amino)-O2'(hydroxyl)[2.64]_N6(amino)-O2(carbonyl)[3.20]		(3,3)	4	10	6	6	1	0	0	0	1	tWS
5dm6.cif1	intra	242	545	X.A.1128.	X.G.2516.	X.C.2568.	WC	19-XIX	cWW	cW-W	X	A|G-C	IP	S	S	LR	LR	SM	GAAAAUG	GUCGCAU	AAGCGGC				23S ribosomal RNA	23S ribosomal RNA	23S ribosomal RNA	deinococcus radiodurans	deinococcus radiodurans	deinococcus radiodurans	O4'-O2'(hydroxyl)[3.08]_N3-O2'(hydroxyl)[2.98]		(2,2)	3	10	5	5	1	0	0	0	1
5dm6.cif1	intra	242	545	X.A.1129.	X.C.2515.	X.G.2569.	WC	19-XIX	cWW	cW-W	I	A|C-G	IP	S	S	LR	LR	SM	AAAAUGA	CGUCGCA	AGCGGCA				23S ribosomal RNA	23S ribosomal RNA	23S ribosomal RNA	deinococcus radiodurans	deinococcus radiodurans	deinococcus radiodurans	O2'(hydroxyl)-O2'(hydroxyl)[2.32]_O2'(hydroxyl)-O2(carbonyl)[2.55]	N1-O2'(hydroxyl)[2.90]	(2,2)	3	10	5	5	0	0	0	0	0		t.S
5dm6.cif1	intra	236	538	X.A.1132.	X.G.2024.	X.C.2039.	WC	19-XIX	cWW	cW-W	X	A|G-C	IP	S	S	LR	LR	SM	AUGAUCG	UUGGCUG	CGGCCUA				23S ribosomal RNA	23S ribosomal RNA	23S ribosomal RNA	deinococcus radiodurans	deinococcus radiodurans	deinococcus radiodurans		N6(amino)-O2(carbonyl)[2.80]_N1-O2'(hydroxyl)[3.17]	(3,4)	4	10	5	5	0	0	0	0	0		cWS
5dm6.cif1	intra	236	538	X.A.1132.	X.C.2025.	X.G.2038.	WC	19-XIX	cWW	cW-W	X	A|C-G	IP	S	S	LR	LR	SM	AUGAUCG	UGGCUGU	GCGGCCU				23S ribosomal RNA	23S ribosomal RNA	23S ribosomal RNA	deinococcus radiodurans	deinococcus radiodurans	deinococcus radiodurans	N7-O2'(hydroxyl)[3.01]_N6(amino)-O2(carbonyl)[2.94]		(3,4)	4	10	5	5	0	0	0	0	0	cHS
5dm6.cif1	intra	0	546	X.A.1214.	X.G.30.	X.C.510.	WC	19-XIX	cWW	cW-W	II	A|G-C	IC	JC	JCJP	LR	LR	SM	AGAAGCC	GAUGCCC	AACCUGA				23S ribosomal RNA	23S ribosomal RNA	23S ribosomal RNA	deinococcus radiodurans	deinococcus radiodurans	deinococcus radiodurans	O2'(hydroxyl)-O2'(hydroxyl)[2.97]_N3-O2'(hydroxyl)[2.61]		(1,1)	3	6	6	19	0	0	0	0	0
5dm6.cif1	intra	0	547	X.A.1220.	X.C.542.	X.G.551.	WC	19-XIX	cWW	cW-W	X	A|C-G	IC	S	S	LR	LR	SM	CAUACCG	GCACCUU	UGCGUGU				23S ribosomal RNA	23S ribosomal RNA	23S ribosomal RNA	deinococcus radiodurans	deinococcus radiodurans	deinococcus radiodurans		N1-N2(amino)[2.62]_N3-O2'(hydroxyl)[2.70]	(1,1)	3	1	10	10	0	0	0	0	0		cWS
5dm6.cif1	intra	243	548	X.A.1225.	X.U.813.	X.A.1194.	WC	20-XX	cWW	cW-W	II	A|U-A	HC	S	S	LR	LR	SM	CGGAAGG	UUCUCCC	GGGAGCG				23S ribosomal RNA	23S ribosomal RNA	23S ribosomal RNA	deinococcus radiodurans	deinococcus radiodurans	deinococcus radiodurans	O2'(hydroxyl)-O2'(hydroxyl)[3.10]_N3-O2'(hydroxyl)[3.36]		(2,2)	3	4	6	6	1	0	0	0	1
5dm6.cif1	intra	243	548	X.A.1226.	X.C.812.	X.G.1195.	WC	19-XIX	cWW	cW-W	I	A|C-G	HC	S	S	LR	LR	SM	GGAAGGA	GUUCUCC	GGAGCGU				23S ribosomal RNA	23S ribosomal RNA	23S ribosomal RNA	deinococcus radiodurans	deinococcus radiodurans	deinococcus radiodurans	O2'(hydroxyl)-O2'(hydroxyl)[2.94]_O2'(hydroxyl)-O2(carbonyl)[3.05]	N1-O2'(hydroxyl)[2.90]_N3-N2(amino)[2.83]	(2,2)	3	4	6	6	1	0	0	0	1		t.S
5dm6.cif1	intra	230	525	X.A.1254.	X.U.672.	X.A.808.	WC	20-XX	cWW	cW-W	I	A|U-A	JC	S	S	LC	LC	SM	CGGAUGC	GACUCGA	GCUAGUU				23S ribosomal RNA	23S ribosomal RNA	23S ribosomal RNA	deinococcus radiodurans	deinococcus radiodurans	deinococcus radiodurans		O2'(hydroxyl)-O2'(hydroxyl)[2.74]	(2,2)	4	8	2	2	0	0	0	0	0
5dm6.cif1	intra	244	549	X.A.1274.	X.G.1296.	X.C.1644.	WC	19-XIX	cWW	cW-W	I	A|G-C	JC	S	S	LC	LC	SM	GAUAAAA	UUCGCCG	AGGCGCG	abAcdeDfgFEChBHiGI	1,2,3,4,5,6,7,8,-7,-6,-5,-4,-3,-2,-1,9,10,11,12,13,14,-13,15,16,17,18,19,20,21,22,23,-22,-21,-20,-19,-18,-17,-16,-15,-14,-12,-11,-10,-9,24,25,26,27,28,29,30,31,-8,-31,-30,-29,-28,-27,-26,-25,-24,32,33,34,35,36,37,-23,-37,-36,-35,-34,-33,-32	10	23S ribosomal RNA	23S ribosomal RNA	23S ribosomal RNA	deinococcus radiodurans	deinococcus radiodurans	deinococcus radiodurans		N1-O2'(hydroxyl)[2.69]	(3,3)	4	5	4	4	0	0	0	0	0	cSS	tWS	Multi Loop	Stem
5dm6.cif1	intra	244	549	X.A.1275.	X.C.1295.	X.G.1645.	WC	19-XIX	cWW	cW-W	I	A|C-G	JC	S	S	LC	LC	SM	AUAAAAG	CUUCGCC	GGCGCGC	abAcdeDfgFEChBHiGI	1,2,3,4,5,6,7,8,-7,-6,-5,-4,-3,-2,-1,9,10,11,12,13,14,-13,15,16,17,18,19,20,21,22,23,-22,-21,-20,-19,-18,-17,-16,-15,-14,-12,-11,-10,-9,24,25,26,27,28,29,30,31,-8,-31,-30,-29,-28,-27,-26,-25,-24,32,33,34,35,36,37,-23,-37,-36,-35,-34,-33,-32	10	23S ribosomal RNA	23S ribosomal RNA	23S ribosomal RNA	deinococcus radiodurans	deinococcus radiodurans	deinococcus radiodurans	N1-O2'(hydroxyl)[2.82]	O3'-O2'(hydroxyl)[3.08]_O2'(hydroxyl)-N2(amino)[3.20]_O2'(hydroxyl)-N3[3.06]_N3-N2(amino)[3.18]	(3,3)	4	5	4	4	0	0	0	0	0		cSS
5dm6.cif1	intra	0	550	X.A.1287.	X.C.1648.	X.G.2009.	WC	19-XIX	cWW	cW-W	X	A|C-G	HC	S	S	LR	LR	SM	AGAAUCU	GCGCGAG	CUCGGUG				23S ribosomal RNA	23S ribosomal RNA	23S ribosomal RNA	deinococcus radiodurans	deinococcus radiodurans	deinococcus radiodurans	N6(amino)-O2(carbonyl)[3.02]_N1-O2'(hydroxyl)[2.91]		(1,1)	3	7	4	4	0	0	0	0	0	cWS
5dm6.cif1	intra	244	549	X.A.1302.	X.C.1297.	X.G.1643.	WC	19-XIX	cWW	cW-W	X	A|C-G	JC	S	S	LC	LC	SM	GUAAGGA	UCGCCGU	AAGGCGC	abAcdeDfgFEChBHiGI	1,2,3,4,5,6,7,8,-7,-6,-5,-4,-3,-2,-1,9,10,11,12,13,14,-13,15,16,17,18,19,20,21,22,23,-22,-21,-20,-19,-18,-17,-16,-15,-14,-12,-11,-10,-9,24,25,26,27,28,29,30,31,-8,-31,-30,-29,-28,-27,-26,-25,-24,32,33,34,35,36,37,-23,-37,-36,-35,-34,-33,-32	10	23S ribosomal RNA	23S ribosomal RNA	23S ribosomal RNA	deinococcus radiodurans	deinococcus radiodurans	deinococcus radiodurans	N6(amino)-O2'(hydroxyl)[3.25]_N1-O2'(hydroxyl)[2.81]		(3,3)	4	4	4	4	1	0	0	0	1		cSS
5dm6.cif1	intra	0	551	X.A.1322.	X.G.1319.	X.C.1333.	WC	19-XIX	cWW	cW-W	X	A|G-C	IC	S	S	LC	LC	SM	GGAAGGG	UGGGGAA	CCGCCCA				23S ribosomal RNA	23S ribosomal RNA	23S ribosomal RNA	deinococcus radiodurans	deinococcus radiodurans	deinococcus radiodurans		N6(amino)-O2(carbonyl)[3.18]_N1-O2'(hydroxyl)[2.55]	(1,1)	3	3	6	6	1	0	0	0	1		cWS
5dm6.cif1	intra	233	531	X.A.1353.	X.A.693.	X.U.769.	WC	20-XX	cWW	cW-W	II	A|A-U	IC	S	S	LR	LR	SM	CCUAAGG	AGCAUGA	UUGUGUU				23S ribosomal RNA	23S ribosomal RNA	23S ribosomal RNA	deinococcus radiodurans	deinococcus radiodurans	deinococcus radiodurans	O2'(hydroxyl)-O2'(hydroxyl)[2.70]_N3-O2'(hydroxyl)[2.86]		(3,3)	4	3	9	9	0	0	0	0	0
5dm6.cif1	intra	233	531	X.A.1354.	X.C.692.	X.G.770.	WC	19-XIX	cWW	cW-W	I	A|C-G	IC	S	S	LR	LR	SM	CUAAGGU	AAGCAUG	UGUGUUU				23S ribosomal RNA	23S ribosomal RNA	23S ribosomal RNA	deinococcus radiodurans	deinococcus radiodurans	deinococcus radiodurans	O3'-O2'(hydroxyl)[3.48]_O2'(hydroxyl)-O2'(hydroxyl)[2.84]_O2'(hydroxyl)-O2(carbonyl)[2.73]	N1-O2'(hydroxyl)[2.94]	(3,3)	4	3	9	9	0	0	0	0	0		tSS	Interior Loop	Stem
5dm6.cif1	intra	0	552	X.A.1365.	X.G.165.A	X.C.181.	WC	19-XIX	cWW	cW-W	X	A|G-C	HC	S	S	LR	LR	SM	CCGAACG	UCAGGGA	UACCUGA				23S ribosomal RNA	23S ribosomal RNA	23S ribosomal RNA	deinococcus radiodurans	deinococcus radiodurans	deinococcus radiodurans	N1-N2(amino)[3.27]_N3-O2'(hydroxyl)[2.99]		(1,1)	3	4	5	5	0	0	0	0	0	cWS
5dm6.cif1	intra	0	553	X.A.1384.	X.G.1343.	X.C.1404.	WC	19-XIX	cWW	cW-W	I	A|G-C	JP	S	S	LC	LC	SM	GACAGCA	AAAGUCG	GCACCGA	abAcdeDfgFEChBHiGI	1,2,3,4,5,6,7,8,-7,-6,-5,-4,-3,-2,-1,9,10,11,12,13,14,-13,15,16,17,18,19,20,21,22,23,-22,-21,-20,-19,-18,-17,-16,-15,-14,-12,-11,-10,-9,24,25,26,27,28,29,30,31,-8,-31,-30,-29,-28,-27,-26,-25,-24,32,33,34,35,36,37,-23,-37,-36,-35,-34,-33,-32	13	23S ribosomal RNA	23S ribosomal RNA	23S ribosomal RNA	deinococcus radiodurans	deinococcus radiodurans	deinococcus radiodurans	N1-O2'(hydroxyl)[2.90]_N3-N2(amino)[3.22]	O2'(hydroxyl)-O2'(hydroxyl)[2.58]_O2'(hydroxyl)-O2(carbonyl)[2.81]	(1,1)	3	3	2	2	0	1	0	0	1	tSS
5dm6.cif1	intra	245	554	X.A.1392.	X.C.1315.	X.G.1337.	WC	19-XIX	cWW	cW-W	II	A|C-G	HC	S	S	LR	LR	SM	GUCAAGA	UUCCUGG	CCAGGGA				23S ribosomal RNA	23S ribosomal RNA	23S ribosomal RNA	deinococcus radiodurans	deinococcus radiodurans	deinococcus radiodurans	O2'(hydroxyl)-O2'(hydroxyl)[2.62]_N3-O2'(hydroxyl)[2.85]		(2,2)	3	8	6	6	0	0	0	0	0	cSS
5dm6.cif1	intra	245	554	X.A.1393.	X.C.1314.	X.G.1338.	WC	19-XIX	cWW	cW-W	I	A|C-G	HC	S	S	LR	LR	SM	UCAAGAU	GUUCCUG	CAGGGAA				23S ribosomal RNA	23S ribosomal RNA	23S ribosomal RNA	deinococcus radiodurans	deinococcus radiodurans	deinococcus radiodurans		N1-O2'(hydroxyl)[2.84]_N3-N2(amino)[3.13]	(2,2)	3	8	6	6	0	0	0	0	0		tWS	Hairpin	Multi Loop
5dm6.cif1	intra	0	555	X.A.1453.	X.C.1451.	X.G.1461.	WC	19-XIX	cWW	cW-W	X	A|C-G	HP	S	S	LC	LC	SM	GCUAUGG	AAGCUAU	UAUGCUG	abAcdeDfgFEChBHiGI	1,2,3,4,5,6,7,8,-7,-6,-5,-4,-3,-2,-1,9,10,11,12,13,14,-13,15,16,17,18,19,20,21,22,23,-22,-21,-20,-19,-18,-17,-16,-15,-14,-12,-11,-10,-9,24,25,26,27,28,29,30,31,-8,-31,-30,-29,-28,-27,-26,-25,-24,32,33,34,35,36,37,-23,-37,-36,-35,-34,-33,-32	22	23S ribosomal RNA	23S ribosomal RNA	23S ribosomal RNA	deinococcus radiodurans	deinococcus radiodurans	deinococcus radiodurans	N6(amino)-O2(carbonyl)[3.32]_N1-O2'(hydroxyl)[3.27]	N6(amino)*N2(amino)[3.39]	(1,1)	3	3	2	2	0	0	0	0	0	cWS	...
5dm6.cif1	intra	246	556	X.A.1477.	X.C.1435.	X.G.1557.	WC	19-XIX	cWW	cW-W	I	A|C-G	IC	S	S	LR	LR	SM	UCAAGGG	UUACGCU	CGCGACG	abAcdeDfgFEChBHiGI	1,2,3,4,5,6,7,8,-7,-6,-5,-4,-3,-2,-1,9,10,11,12,13,14,-13,15,16,17,18,19,20,21,22,23,-22,-21,-20,-19,-18,-17,-16,-15,-14,-12,-11,-10,-9,24,25,26,27,28,29,30,31,-8,-31,-30,-29,-28,-27,-26,-25,-24,32,33,34,35,36,37,-23,-37,-36,-35,-34,-33,-32	19	23S ribosomal RNA	23S ribosomal RNA	23S ribosomal RNA	deinococcus radiodurans	deinococcus radiodurans	deinococcus radiodurans	O2'(hydroxyl)-O2'(hydroxyl)[3.01]	N1-O2'(hydroxyl)[2.85]	(2,2)	4	2	3	3	0	0	0	0	0		tWS
5dm6.cif1	intra	0	557	X.A.1496.	X.G.1421.	X.C.1577.	WC	19-XIX	cWW	cW-W	II	A|G-C	HC	S	S	LR	LR	SM	AAAAUCU	GAUGGAG	CUUCUAA	abAcdeDfgFEChBHiGI	1,2,3,4,5,6,7,8,-7,-6,-5,-4,-3,-2,-1,9,10,11,12,13,14,-13,15,16,17,18,19,20,21,22,23,-22,-21,-20,-19,-18,-17,-16,-15,-14,-12,-11,-10,-9,24,25,26,27,28,29,30,31,-8,-31,-30,-29,-28,-27,-26,-25,-24,32,33,34,35,36,37,-23,-37,-36,-35,-34,-33,-32	17	23S ribosomal RNA	23S ribosomal RNA	23S ribosomal RNA	deinococcus radiodurans	deinococcus radiodurans	deinococcus radiodurans		O2'(hydroxyl)-O3'[2.96]_O2'(hydroxyl)-O2'(hydroxyl)[2.91]_N3-O2'(hydroxyl)[2.81]	(1,1)	3	5	4	4	0	0	0	0	0
5dm6.cif1	intra	246	556	X.A.1516.	X.G.1436.	X.C.1556.	WC	19-XIX	cWW	cW-W	I	A|G-C	IC	S	S	LR	LR	SM	CUCAGAC	UACGCUA	ACGCGAC	abAcdeDfgFEChBHiGI	1,2,3,4,5,6,7,8,-7,-6,-5,-4,-3,-2,-1,9,10,11,12,13,14,-13,15,16,17,18,19,20,21,22,23,-22,-21,-20,-19,-18,-17,-16,-15,-14,-12,-11,-10,-9,24,25,26,27,28,29,30,31,-8,-31,-30,-29,-28,-27,-26,-25,-24,32,33,34,35,36,37,-23,-37,-36,-35,-34,-33,-32	19	23S ribosomal RNA	23S ribosomal RNA	23S ribosomal RNA	deinococcus radiodurans	deinococcus radiodurans	deinococcus radiodurans	N1-O2'(hydroxyl)[3.27]_N3-N2(amino)[3.01]	O2'(hydroxyl)-O2'(hydroxyl)[2.64]_O2'(hydroxyl)-O2(carbonyl)[2.88]	(2,2)	4	2	3	3	0	0	0	0	0	tSS		Interior Loop	Stem
5dm6.cif1	intra	247	558	X.A.1528.	X.G.1529.	X.C.1542.	WC	19-XIX	cWW	cW-W	X	A|G-C	JCJP	S	S	LC	LC	SM	GGGAGCU	GGAGCUU	AAGCGAA				23S ribosomal RNA	23S ribosomal RNA	23S ribosomal RNA	deinococcus radiodurans	deinococcus radiodurans	deinococcus radiodurans	N6(amino)-N3[2.94]		(3,3)	6	3	5	5	1	0	0	0	1
5dm6.cif1	intra	247	558	X.A.1544.	X.C.1447.	X.G.1464.	WC	19-XIX	cWW	cW-W	II	A|C-G	JCJP	S	S	LC	LC	SM	GCGAAGU	UGCCAAG	GCUGGUU	abAcdeDfgFEChBHiGI	1,2,3,4,5,6,7,8,-7,-6,-5,-4,-3,-2,-1,9,10,11,12,13,14,-13,15,16,17,18,19,20,21,22,23,-22,-21,-20,-19,-18,-17,-16,-15,-14,-12,-11,-10,-9,24,25,26,27,28,29,30,31,-8,-31,-30,-29,-28,-27,-26,-25,-24,32,33,34,35,36,37,-23,-37,-36,-35,-34,-33,-32	21	23S ribosomal RNA	23S ribosomal RNA	23S ribosomal RNA	deinococcus radiodurans	deinococcus radiodurans	deinococcus radiodurans	O2'(hydroxyl)-O2'(hydroxyl)[2.68]_N3-O2'(hydroxyl)[2.70]		(3,3)	6	4	4	4	1	0	0	0	1
5dm6.cif1	intra	247	558	X.A.1545.	X.C.1446.	X.G.1465.	WC	19-XIX	cWW	cW-W	I	A|C-G	JCJP	S	S	LC	LC	SM	CGAAGUU	AUGCCAA	CUGGUUG	abAcdeDfgFEChBHiGI	1,2,3,4,5,6,7,8,-7,-6,-5,-4,-3,-2,-1,9,10,11,12,13,14,-13,15,16,17,18,19,20,21,22,23,-22,-21,-20,-19,-18,-17,-16,-15,-14,-12,-11,-10,-9,24,25,26,27,28,29,30,31,-8,-31,-30,-29,-28,-27,-26,-25,-24,32,33,34,35,36,37,-23,-37,-36,-35,-34,-33,-32	21	23S ribosomal RNA	23S ribosomal RNA	23S ribosomal RNA	deinococcus radiodurans	deinococcus radiodurans	deinococcus radiodurans	O3'-O2'(hydroxyl)[3.17]_O2'(hydroxyl)-O2'(hydroxyl)[2.73]_O2'(hydroxyl)-O2(carbonyl)[3.05]	N1-O2'(hydroxyl)[3.06]_N3-N2(amino)[3.13]	(3,3)	6	4	4	4	0	0	0	0	0		tSS	Multi Loop	Stem
5dm6.cif1	intra	248	559	X.A.1569.	X.C.1351.	X.G.1380.	WC	19-XIX	cWW	cW-W	X	A|C-G	ICJP	S	S	LR	LR	SM	AAGAAAA	GACCUAA	GAUGGAC				23S ribosomal RNA	23S ribosomal RNA	23S ribosomal RNA	deinococcus radiodurans	deinococcus radiodurans	deinococcus radiodurans		N6(amino)-O2'(hydroxyl)[2.93]	(4,2)	3	9	2	2	1	0	0	0	1
5dm6.cif1	intra	248	559	X.A.1570.	X.C.1351.	X.G.1380.	WC	19-XIX	cWW	cW-W	X	A|C-G	ICJP	S	S	LR	LR	SM	AGAAAAG	GACCUAA	GAUGGAC				23S ribosomal RNA	23S ribosomal RNA	23S ribosomal RNA	deinococcus radiodurans	deinococcus radiodurans	deinococcus radiodurans		N1-N2(amino)[2.79]	(4,2)	3	9	2	2	1	0	0	0	1		tWS
5dm6.cif1	intra	248	559	X.A.1571.	X.C.1351.	X.G.1380.	WC	19-XIX	cWW	cW-W	II	A|C-G	ICJP	S	S	LR	LR	SM	GAAAAGC	GACCUAA	GAUGGAC				23S ribosomal RNA	23S ribosomal RNA	23S ribosomal RNA	deinococcus radiodurans	deinococcus radiodurans	deinococcus radiodurans	O2'(hydroxyl)-O3'[2.93]_O2'(hydroxyl)-O2'(hydroxyl)[3.09]_N3-O2'(hydroxyl)[2.74]		(4,2)	3	9	2	2	1	0	0	0	1
5dm6.cif1	intra	248	559	X.A.1572.	X.C.1350.	X.G.1381.	WC	19-XIX	cWW	cW-W	I	A|C-G	ICJP	S	S	LR	LR	SM	AAAAGCU	GGACCUA	AUGGACA				23S ribosomal RNA	23S ribosomal RNA	23S ribosomal RNA	deinococcus radiodurans	deinococcus radiodurans	deinococcus radiodurans	O2'(hydroxyl)-O2'(hydroxyl)[3.56]		(4,2)	3	9	2	2	0	0	0	0	0
5dm6.cif1	intra	0	560	X.A.1610.	X.G.1310.	X.C.1604.	WC	19-XIX	cWW	cW-W	I	A|G-C	JCJP	S	S	LC	LC	SM	CAAACCG	AAGGGUU	GUACCGC	abAcdeDfgFEChBHiGI	1,2,3,4,5,6,7,8,-7,-6,-5,-4,-3,-2,-1,9,10,11,12,13,14,-13,15,16,17,18,19,20,21,22,23,-22,-21,-20,-19,-18,-17,-16,-15,-14,-12,-11,-10,-9,24,25,26,27,28,29,30,31,-8,-31,-30,-29,-28,-27,-26,-25,-24,32,33,34,35,36,37,-23,-37,-36,-35,-34,-33,-32	12	23S ribosomal RNA	23S ribosomal RNA	23S ribosomal RNA	deinococcus radiodurans	deinococcus radiodurans	deinococcus radiodurans	N3-N2(amino)[3.36]	N1-O2'(hydroxyl)[2.65]	(1,1)	3	5	2	2	0	0	0	0	0	cSS		Multi Loop	Stem
5dm6.cif1	intra	0	561	X.A.1616.	X.G.1324.	X.C.1330.	WC	19-XIX	cWW	cW-W	X	A|G-C	HC	S	S	LR	LR	SM	GACACAG	AAGGGUC	CGUCCGC				23S ribosomal RNA	23S ribosomal RNA	23S ribosomal RNA	deinococcus radiodurans	deinococcus radiodurans	deinococcus radiodurans	N6(amino)-N3[3.25]		(1,1)	3	6	2	2	0	0	0	0	0	cWS
5dm6.cif1	intra	0	562	X.A.1668.	X.G.1674.	X.C.1990.	WC	19-XIX	cWW	cW-W	X	A|G-C	JC	JC	JC	SM	SM	SM	AGGAACU	UUUGCAA	GCGCUGU				23S ribosomal RNA	23S ribosomal RNA	23S ribosomal RNA	deinococcus radiodurans	deinococcus radiodurans	deinococcus radiodurans	O2'(hydroxyl)-N7[2.54]		(1,1)	2	15	15	5	1	0	0	0	1
5dm6.cif1	intra	0	563	X.A.1749.	X.G.2694.	X.C.2715.	WC	19-XIX	cWW	cW-W	X	A|G-C	JC	S	S	LR	LR	SM	CGCAGUG	CCUGCUG	AUGCAGG	abAcdeDfgFEChBHiGI	1,2,3,4,5,6,7,8,-7,-6,-5,-4,-3,-2,-1,9,10,11,12,13,14,-13,15,16,17,18,19,20,21,22,23,-22,-21,-20,-19,-18,-17,-16,-15,-14,-12,-11,-10,-9,24,25,26,27,28,29,30,31,-8,-31,-30,-29,-28,-27,-26,-25,-24,32,33,34,35,36,37,-23,-37,-36,-35,-34,-33,-32	36	23S ribosomal RNA	23S ribosomal RNA	23S ribosomal RNA	deinococcus radiodurans	deinococcus radiodurans	deinococcus radiodurans	N6(amino)-O2'(hydroxyl)[3.17]_N6(amino)-N3[3.18]_N1-N2(amino)[2.99]		(1,1)	3	12	5	5	0	0	0	0	0	tWS
5dm6.cif1	intra	0	564	X.A.1754.	X.G.1629.	X.C.1636.	WC	19-XIX	cWW	cW-W	X	A|G-C	JC	S	S	LR	LR	SM	UGAAUAG	AGUGUCA	AUGCACU				23S ribosomal RNA	23S ribosomal RNA	23S ribosomal RNA	deinococcus radiodurans	deinococcus radiodurans	deinococcus radiodurans		O2'(hydroxyl)-O2'(hydroxyl)[2.36]_N3-O2'(hydroxyl)[2.52]	(1,1)	3	12	5	5	0	1	0	0	1
5dm6.cif1	intra	249	565	X.A.1785.	X.G.2588.	X.C.2606.	WC	19-XIX	cWW	cW-W	X	A|G-C	JC	S	S	LR	LR	SM	CAAAAUC	UCAGAAC	GUUCGGU				23S ribosomal RNA	23S ribosomal RNA	23S ribosomal RNA	deinococcus radiodurans	deinococcus radiodurans	deinococcus radiodurans	N1-O2'(hydroxyl)[2.77]		(2,2)	4	19	4	4	0	0	0	0	0	tWS
5dm6.cif1	intra	250	566	X.A.1802.	X.U.1798.	X.A.1821.	WC	20-XX	cWW	cW-W	X	A|U-A	IC	S	S	LC	LC	SM	GCCAACA	CUCUGCC	UAUAGGG				23S ribosomal RNA	23S ribosomal RNA	23S ribosomal RNA	deinococcus radiodurans	deinococcus radiodurans	deinococcus radiodurans	O2'(hydroxyl)-O3'[2.83]_O2'(hydroxyl)-O2'(hydroxyl)[2.61]_N3-O2'(hydroxyl)[2.83]		(2,2)	3	5	7	7	0	1	0	0	1
5dm6.cif1	intra	250	566	X.A.1803.	X.C.1797.	X.G.1822.	WC	19-XIX	cWW	cW-W	I	A|C-G	IC	S	S	LC	LC	SM	CCAACAC	ACUCUGC	AUAGGGU				23S ribosomal RNA	23S ribosomal RNA	23S ribosomal RNA	deinococcus radiodurans	deinococcus radiodurans	deinococcus radiodurans	O2'(hydroxyl)-O2'(hydroxyl)[3.29]	N1-O2'(hydroxyl)[2.64]_N3-N2(amino)[3.43]	(2,2)	3	5	7	7	0	1	0	0	1		tWS
5dm6.cif1	intra	251	567	X.A.1808.	X.C.1363.	X.G.1368.	WC	19-XIX	cWW	cW-W	X	A|C-G	HC	S	S	LR	LR	SM	ACGAACA	GGCCGAA	AACGGCG				23S ribosomal RNA	23S ribosomal RNA	23S ribosomal RNA	deinococcus radiodurans	deinococcus radiodurans	deinococcus radiodurans		N7-N2(amino)[3.24]_N6(amino)-O2'(hydroxyl)[2.68]	(3,2)	3	5	3	3	0	1	0	0	1		tHS
5dm6.cif1	intra	251	567	X.A.1809.	X.C.1362.	X.G.1369.	WC	19-XIX	cWW	cW-W	X	A|C-G	HC	S	S	LR	LR	SM	CGAACAG	AGGCCGA	ACGGCGC				23S ribosomal RNA	23S ribosomal RNA	23S ribosomal RNA	deinococcus radiodurans	deinococcus radiodurans	deinococcus radiodurans		N6(amino)-O2'(hydroxyl)[3.01]_N1*N3[3.26]	(3,2)	3	5	3	3	0	1	0	0	1		tWS
5dm6.cif1	intra	251	567	X.A.1810.	X.C.1362.	X.G.1369.	WC	19-XIX	cWW	cW-W	I	A|C-G	HC	S	S	LR	LR	SM	AACAGUG	AGGCCGA	ACGGCGC				23S ribosomal RNA	23S ribosomal RNA	23S ribosomal RNA	deinococcus radiodurans	deinococcus radiodurans	deinococcus radiodurans	O2'(hydroxyl)-O2'(hydroxyl)[2.82]_O2'(hydroxyl)-O2(carbonyl)[2.92]	N3-N2(amino)[3.34]	(3,2)	3	5	3	3	0	1	0	0	1
5dm6.cif1	intra	0	568	X.A.1848.	X.G.1846.	X.C.1894.	WC	19-XIX	cWW	cW-W	X	A|G-C	BC	S	S	LC	LC	SM	GGAAGGU	CCGGAAG	GCCCCGG				23S ribosomal RNA	23S ribosomal RNA	23S ribosomal RNA	deinococcus radiodurans	deinococcus radiodurans	deinococcus radiodurans		N6(amino)-O2(carbonyl)[3.42]	(1,1)	3	2	5	5	1	0	0	0	1		tW.
5dm6.cif1	intra	252	569	X.A.1853.	X.U.2086.	X.U.2233.	NA	16-XVI	cWW	cW-W	X	A|U-U	IC	IC	IC	LR	LR	SM	GUCAAGU	GUCUGGC	GCUUGGC				23S ribosomal RNA	23S ribosomal RNA	23S ribosomal RNA	deinococcus radiodurans	deinococcus radiodurans	deinococcus radiodurans		O2'(hydroxyl)-O3'[3.21]_O2'(hydroxyl)-O2'(hydroxyl)[2.86]_N3-O2'(hydroxyl)[2.79]	(4,3)	8	4	1	1	0	0	0	0	0
5dm6.cif1	intra	252	569	X.A.1854.	X.G.2087.	X.U.2232.	WB	28-XXVIII	cWW	cW-W	I	A|G-U	IC	S	S	LR	LR	SM	UCAAGUG	UCUGGCA	UGCUUGG				23S ribosomal RNA	23S ribosomal RNA	23S ribosomal RNA	deinococcus radiodurans	deinococcus radiodurans	deinococcus radiodurans	N1-O2'(hydroxyl)[2.89]		(4,3)	8	4	5	5	0	0	0	0	0	tSS
5dm6.cif1	intra	252	569	X.A.1889.	X.U.2086.	X.U.2233.	NA	16-XVI	cWW	cW-W	X	A|U-U	IC	IC	IC	LR	LR	SM	AUGAAGC	GUCUGGC	GCUUGGC				23S ribosomal RNA	23S ribosomal RNA	23S ribosomal RNA	deinococcus radiodurans	deinococcus radiodurans	deinococcus radiodurans	O2'(hydroxyl)-O3'[2.94]_O2'(hydroxyl)-O2'(hydroxyl)[3.08]_N3-O2'(hydroxyl)[2.73]		(4,3)	8	4	1	1	0	0	0	0	0
5dm6.cif1	intra	252	569	X.A.1890.	X.C.2085.	X.G.2234.	WC	19-XIX	cWW	cW-W	I	A|C-G	IC	S	S	LR	LR	SM	UGAAGCC	AGUCUGG	CUUGGCG				23S ribosomal RNA	23S ribosomal RNA	23S ribosomal RNA	deinococcus radiodurans	deinococcus radiodurans	deinococcus radiodurans	O2'(hydroxyl)-O2'(hydroxyl)[3.38]	N1-O2'(hydroxyl)[3.25]_N3-N2(amino)[3.20]	(4,3)	8	4	3	3	0	0	0	0	0		tSS
5dm6.cif1	intra	0	570	X.A.1900.	X.C.1793.	X.G.1826.	WC	19-XIX	cWW	cW-W	I	A|C-G	BC	S	S	LR	LR	SM	GUGAACG	CAGCACU	GGUGUGA				23S ribosomal RNA	23S ribosomal RNA	23S ribosomal RNA	deinococcus radiodurans	deinococcus radiodurans	deinococcus radiodurans	N1-O2'(hydroxyl)[2.95]	N3-N2(amino)[3.60]	(1,1)	3	2	7	7	1	0	0	0	1		cSS
5dm6.cif1	intra	253	571	X.A.1927.	X.C.1837.	X.G.1903.	WC	19-XIX	cWW	cW-W	II	A|C-G	JC	S	S	LC	LC	SM	CCUAAGG	UGCCCGG	AACGGCG				23S ribosomal RNA	23S ribosomal RNA	23S ribosomal RNA	deinococcus radiodurans	deinococcus radiodurans	deinococcus radiodurans	O2'(hydroxyl)-O3'[3.13]_O2'(hydroxyl)-O2'(hydroxyl)[3.01]_N3-O2'(hydroxyl)[2.61]		(2,2)	3	22	3	3	0	0	0	0	0	cSS
5dm6.cif1	intra	253	571	X.A.1928.	X.C.1836.	X.G.1904.	WC	19-XIX	cWW	cW-W	I	A|C-G	JC	S	S	LC	LC	SM	CUAAGGU	CUGCCCG	ACGGCGG				23S ribosomal RNA	23S ribosomal RNA	23S ribosomal RNA	deinococcus radiodurans	deinococcus radiodurans	deinococcus radiodurans	O2'(hydroxyl)-O2'(hydroxyl)[3.32]	N1-O2'(hydroxyl)[2.43]_N3-N2(amino)[3.50]	(2,2)	3	22	3	3	0	0	0	0	0		tWS
5dm6.cif1	intra	0	572	X.A.1937.	X.C.1934.	X.G.1964.	WC	19-XIX	cWW	cW-W	X	A|C-G	JC	JC	JC	SM	SM	SM	CGAAAUU	UAGCGAA	CCUGCAC				23S ribosomal RNA	23S ribosomal RNA	23S ribosomal RNA	deinococcus radiodurans	deinococcus radiodurans	deinococcus radiodurans		N1-N2(amino)[3.22]	(1,1)	2	22	22	10	1	0	0	0	1		tWS
5dm6.cif1	intra	249	565	X.A.1938.	X.A.2589.	X.U.2605.	WC	20-XX	cWW	cW-W	X	A|A-U	JC	S	S	LR	LR	SM	GAAAUUC	CAGAACG	AGUUCGG				23S ribosomal RNA	23S ribosomal RNA	23S ribosomal RNA	deinococcus radiodurans	deinococcus radiodurans	deinococcus radiodurans		N3-O2'(hydroxyl)[2.95]	(2,2)	4	22	4	4	1	0	0	0	1		cSS
5dm6.cif1	intra	254	573	X.A.1952.	X.G.2548.	X.C.2560.	WC	19-XIX	cWW	cW-W	II	A|G-C	HC	S	S	LR	LR	SM	GGUAAGU	GUUGGGC	GCCCAUU				23S ribosomal RNA	23S ribosomal RNA	23S ribosomal RNA	deinococcus radiodurans	deinococcus radiodurans	deinococcus radiodurans		O2'(hydroxyl)-O3'[3.32]_O2'(hydroxyl)-O2'(hydroxyl)[2.87]_N3-O2'(hydroxyl)[2.82]	(2,2)	3	7	5	5	1	0	0	0	1
5dm6.cif1	intra	254	573	X.A.1953.	X.G.2549.	X.C.2559.	WC	19-XIX	cWW	cW-W	I	A|G-C	HC	S	S	LR	LR	SM	GUAAGUU	UUGGGCU	CGCCCAU				23S ribosomal RNA	23S ribosomal RNA	23S ribosomal RNA	deinococcus radiodurans	deinococcus radiodurans	deinococcus radiodurans	N1-O2'(hydroxyl)[2.83]_N3-N2(amino)[2.95]	O3'-O2'(hydroxyl)[3.17]_O2'(hydroxyl)-O2'(hydroxyl)[2.66]_O2'(hydroxyl)-O2(carbonyl)[2.99]	(2,2)	3	7	5	5	1	0	0	0	1	tSS		Hairpin	Stem
5dm6.cif1	intra	0	574	X.A.1966.	X.G.2592.	X.C.2601.	WC	19-XIX	cWW	cW-W	X	A|G-C	JC	S	S	LR	LR	SM	UGCACGA	AACGUCG	AGACAGU				23S ribosomal RNA	23S ribosomal RNA	23S ribosomal RNA	deinococcus radiodurans	deinococcus radiodurans	deinococcus radiodurans	N3-O2'(hydroxyl)[2.76]		(1,1)	3	10	3	3	0	0	0	0	0	cWS
5dm6.cif1	intra	0	575	X.A.1969.	X.C.1833.	X.G.1972.	WC	19-XIX	cWW	cW-W	I	A|C-G	JC	S	S	LC	LC	SM	ACGAAAG	CGCCUGC	AAAGGCG				23S ribosomal RNA	23S ribosomal RNA	23S ribosomal RNA	deinococcus radiodurans	deinococcus radiodurans	deinococcus radiodurans	N1-O2'(hydroxyl)[2.65]	O3'-O2'(hydroxyl)[3.31]_O2'(hydroxyl)-O2'(hydroxyl)[2.81]_O2'(hydroxyl)-N3[2.62]_N3-N2(amino)[3.11]	(1,1)	3	10	4	4	1	0	0	0	1	tWS	cSS
5dm6.cif1	intra	0	576	X.A.1981.	X.G.738.	X.C.758.	WC	19-XIX	cWW	cW-W	II	A|G-C	BC	S	S	LR	LR	SM	ACGAUCU	ACCGGUG	UCUCGGA				23S ribosomal RNA	23S ribosomal RNA	23S ribosomal RNA	deinococcus radiodurans	deinococcus radiodurans	deinococcus radiodurans	N1-N2(amino)[2.88]	N3-O2'(hydroxyl)[2.75]	(1,1)	3	1	3	3	0	0	0	0	0	tW.	cSS
5dm6.cif1	intra	255	577	X.A.2273.	X.A.953.	X.C.964.	-W	n/a	cWW	cW-W	X	A|A-C	HC	IC	IC	LR	LR	SM	UGUAACG	GCGAGAG	CUUCCGU				23S ribosomal RNA	23S ribosomal RNA	23S ribosomal RNA	deinococcus radiodurans	deinococcus radiodurans	deinococcus radiodurans		O2'(hydroxyl)-O3'[3.01]_O2'(hydroxyl)-O2'(hydroxyl)[2.88]_N3-O2'(hydroxyl)[2.54]	(2,2)	5	11	1	1	1	0	1	0	1
5dm6.cif1	intra	255	577	X.A.2274.	X.G.954.	X.U.963.	WB	28-XXVIII	cWW	cW-W	X	A|G-U	HC	S	S	LR	LR	SM	GUAACGG	CGAGAGC	ACUUCCG				23S ribosomal RNA	23S ribosomal RNA	23S ribosomal RNA	deinococcus radiodurans	deinococcus radiodurans	deinococcus radiodurans	N1-O2'(hydroxyl)[2.33]_N3-N2(amino)[2.99]		(2,2)	5	11	2	2	1	0	1	0	1	tWS
5dm6.cif1	intra	0	578	X.A.2288.	X.C.2284.	X.G.2384.	WC	19-XIX	cWW	cW-W	X	A|C-G	JC	S	S	LC	LC	SM	CAAAGGU	CGCCCAA	CGGGCUU	abAB	1,2,3,-2,-1,-3	1	23S ribosomal RNA	23S ribosomal RNA	23S ribosomal RNA	deinococcus radiodurans	deinococcus radiodurans	deinococcus radiodurans	N6(amino)-O2'(hydroxyl)[3.20]_N1-O2'(hydroxyl)[3.04]	N3-N2(amino)[3.15]	(1,1)	3	3	2	2	0	0	0	0	0		cSS
5dm6.cif1	intra	256	579	X.A.2327.	X.C.2261.	X.G.2279.	WC	19-XIX	cWW	cW-W	I	A|C-G	IP	S	S	LR	LR	SM	CGCAAAG	CGCCUCC	GGAGGCG				23S ribosomal RNA	23S ribosomal RNA	23S ribosomal RNA	deinococcus radiodurans	deinococcus radiodurans	deinococcus radiodurans	N1-O2'(hydroxyl)[2.88]	O2'(hydroxyl)-O2'(hydroxyl)[2.84]_N3-N2(amino)[3.29]	(2,2)	4	10	6	6	1	0	0	0	1		cSS
5dm6.cif1	intra	256	579	X.A.2388.	X.C.2260.	X.G.2280.	WC	19-XIX	cWW	cW-W	I	A|C-G	JIJP	S	S	LC	LC	SM	CUUAGUG	UCGCCUC	GAGGCGC				23S ribosomal RNA	23S ribosomal RNA	23S ribosomal RNA	deinococcus radiodurans	deinococcus radiodurans	deinococcus radiodurans	O2'(hydroxyl)-O2'(hydroxyl)[2.47]	N1-O2'(hydroxyl)[3.04]_N3-N2(amino)[3.23]	(2,2)	4	7	6	6	0	0	0	0	0		tSS
5dm6.cif1	intra	225	514	X.A.2434.	X.A.2077.	X.U.2243.	WC	20-XX	cWW	cW-W	I	A|A-U	JI	S	S	LC	LC	SM	UAAAAGU	UUUACUA	UAGUUUG				23S ribosomal RNA	23S ribosomal RNA	23S ribosomal RNA	deinococcus radiodurans	deinococcus radiodurans	deinococcus radiodurans	O2'(hydroxyl)-O2'(hydroxyl)[2.77]_O2'(hydroxyl)-N3[2.91]	N1-O2'(hydroxyl)[3.23]	(2,2)	4	13	5	5	0	0	0	0	0
5dm6.cif1	intra	0	580	X.A.2531.	X.C.2658.	X.G.2663.	WC	19-XIX	cWW	cW-W	II	A|C-G	HC	HC	HC	LR	LR	SM	UGAAGAA	GUACGAG	AGAGGAC				23S ribosomal RNA	23S ribosomal RNA	23S ribosomal RNA	deinococcus radiodurans	deinococcus radiodurans	deinococcus radiodurans	O2'(hydroxyl)-O2'(hydroxyl)[3.12]_N3-O2'(hydroxyl)[2.80]		(1,1)	2	6	15	15	0	0	0	0	0
5dm6.cif1	intra	257	581	X.A.2564.	X.C.2521.	X.G.2544.	WC	19-XIX	cWW	cW-W	II	A|C-G	JC	S	S	LC	LC	SM	AUUAAAG	AUCCUGG	AAGGGUU				23S ribosomal RNA	23S ribosomal RNA	23S ribosomal RNA	deinococcus radiodurans	deinococcus radiodurans	deinococcus radiodurans	O2'(hydroxyl)-O3'[2.90]_O2'(hydroxyl)-O2'(hydroxyl)[2.66]_N3-O2'(hydroxyl)[3.00]		(2,2)	3	5	3	3	0	1	0	0	1
5dm6.cif1	intra	257	581	X.A.2565.	X.C.2520.	X.G.2545.	WC	19-XIX	cWW	cW-W	I	A|C-G	JC	S	S	LC	LC	SM	UUAAAGC	CAUCCUG	AGGGUUG				23S ribosomal RNA	23S ribosomal RNA	23S ribosomal RNA	deinococcus radiodurans	deinococcus radiodurans	deinococcus radiodurans	O3'-O2'(hydroxyl)[3.34]_O2'(hydroxyl)-O2'(hydroxyl)[2.97]_O2'(hydroxyl)-O2(carbonyl)[2.96]	N1-O2'(hydroxyl)[2.93]_N3-N2(amino)[3.37]	(2,2)	3	5	3	3	0	0	0	0	0		tSS
5dm6.cif1	intra	0	582	X.A.2572.	X.C.2452.	X.U.2504.	NA	18-XVIII	cWW	cW-W	X	A|C-U	IC	JC	JC	LR	LR	SM	GGCACGC	UAACAGG	CGAUGUC				23S ribosomal RNA	23S ribosomal RNA	23S ribosomal RNA	deinococcus radiodurans	deinococcus radiodurans	deinococcus radiodurans		N1-O2'(hydroxyl)[3.00]	(1,1)	3	6	8	11	0	0	0	0	0		tWS
5dm6.cif1	intra	0	583	X.A.2598.	X.C.2073.	X.G.2436.	WC	19-XIX	cWW	cW-W	I	A|C-G	HC	S	S	LR	LR	SM	GUGAGAC	GAGCUUU	AAAGUUA	abAcdeDfgFEChBHiGI	1,2,3,4,5,6,7,8,-7,-6,-5,-4,-3,-2,-1,9,10,11,12,13,14,-13,15,16,17,18,19,20,21,22,23,-22,-21,-20,-19,-18,-17,-16,-15,-14,-12,-11,-10,-9,24,25,26,27,28,29,30,31,-8,-31,-30,-29,-28,-27,-26,-25,-24,32,33,34,35,36,37,-23,-37,-36,-35,-34,-33,-32	28	23S ribosomal RNA	23S ribosomal RNA	23S ribosomal RNA	deinococcus radiodurans	deinococcus radiodurans	deinococcus radiodurans	O2'(hydroxyl)-O2'(hydroxyl)[2.59]	N1-O2'(hydroxyl)[2.81]_N3-N2(amino)[3.29]	(1,1)	3	4	4	4	1	0	0	0	1		tWS	Hairpin	Stem
5dm6.cif1	intra	0	584	X.A.2712.A	X.U.1659.	X.A.2001.	WC	20-XX	cWW	cW-W	I	A|U-A	BC	S	S	LR	LR	SM	CACAUGC	CCCUCGU	ACGAGGG				23S ribosomal RNA	23S ribosomal RNA	23S ribosomal RNA	deinococcus radiodurans	deinococcus radiodurans	deinococcus radiodurans	N1-O2'(hydroxyl)[2.89]		(1,1)	3	3	8	8	0	0	0	0	0
5dm6.cif1	intra	258	585	X.A.2740.	X.G.2523.	X.C.2540.	WC	19-XIX	cWW	cW-W	II	A|G-C	IC	S	S	LR	LR	SM	GAUAACC	CCUGGGG	UCCCAAG				23S ribosomal RNA	23S ribosomal RNA	23S ribosomal RNA	deinococcus radiodurans	deinococcus radiodurans	deinococcus radiodurans		O2'(hydroxyl)-O3'[3.17]_O2'(hydroxyl)-O2'(hydroxyl)[2.54]_N3-O2'(hydroxyl)[2.70]	(2,2)	3	4	6	6	0	0	1	0	1	tW.
5dm6.cif1	intra	258	585	X.A.2741.	X.G.2524.	X.C.2539.	WC	19-XIX	cWW	cW-W	I	A|G-C	IC	S	S	LR	LR	SM	AUAACCG	CUGGGGC	GUCCCAA				23S ribosomal RNA	23S ribosomal RNA	23S ribosomal RNA	deinococcus radiodurans	deinococcus radiodurans	deinococcus radiodurans	N1-O2'(hydroxyl)[2.86]_N3-N2(amino)[2.81]	O2'(hydroxyl)-O2'(hydroxyl)[2.61]_O2'(hydroxyl)-O2(carbonyl)[2.80]	(2,2)	3	4	6	6	0	0	1	0	1	tSS		Interior Loop	Stem
5dm6.cif1	intra	259	586	X.A.2809.	X.G.2630.	X.C.2788.	WC	19-XIX	cWW	cW-W	II	A|G-C	JI	S	S	LC	LC	SM	GGUAAGA	GCAGGAG	CUCCCAC	abAcdeDfgFEChBHiGI	1,2,3,4,5,6,7,8,-7,-6,-5,-4,-3,-2,-1,9,10,11,12,13,14,-13,15,16,17,18,19,20,21,22,23,-22,-21,-20,-19,-18,-17,-16,-15,-14,-12,-11,-10,-9,24,25,26,27,28,29,30,31,-8,-31,-30,-29,-28,-27,-26,-25,-24,32,33,34,35,36,37,-23,-37,-36,-35,-34,-33,-32	32	23S ribosomal RNA	23S ribosomal RNA	23S ribosomal RNA	deinococcus radiodurans	deinococcus radiodurans	deinococcus radiodurans		O2'(hydroxyl)-O3'[3.18]_O2'(hydroxyl)-O2'(hydroxyl)[2.89]_N3-O2'(hydroxyl)[2.59]	(3,2)	4	4	7	7	1	0	0	0	1
5dm6.cif1	intra	259	586	X.A.2810.	X.G.2631.	X.C.2787.	WC	19-XIX	cWW	cW-W	I	A|G-C	JI	S	S	LC	LC	SM	GUAAGAC	CAGGAGA	UCUCCCA	abAcdeDfgFEChBHiGI	1,2,3,4,5,6,7,8,-7,-6,-5,-4,-3,-2,-1,9,10,11,12,13,14,-13,15,16,17,18,19,20,21,22,23,-22,-21,-20,-19,-18,-17,-16,-15,-14,-12,-11,-10,-9,24,25,26,27,28,29,30,31,-8,-31,-30,-29,-28,-27,-26,-25,-24,32,33,34,35,36,37,-23,-37,-36,-35,-34,-33,-32	32	23S ribosomal RNA	23S ribosomal RNA	23S ribosomal RNA	deinococcus radiodurans	deinococcus radiodurans	deinococcus radiodurans	N1-O2'(hydroxyl)[2.43]_N3-N2(amino)[3.47]	O2'(hydroxyl)-O2'(hydroxyl)[2.50]_O2'(hydroxyl)-O2(carbonyl)[3.14]	(3,2)	4	4	7	7	1	0	0	0	1	tSS		Multi Loop	Stem
5dm6.cif1	intra	0	587	X.A.2823.	X.U.2047.	X.A.2621.	WC	20-XX	cWW	cW-W	X	A|U-A	HC	S	S	LR	LR	SM	AAGACCA	CCGUAGC	GCUACGG	abAcdeDfgFEChBHiGI	1,2,3,4,5,6,7,8,-7,-6,-5,-4,-3,-2,-1,9,10,11,12,13,14,-13,15,16,17,18,19,20,21,22,23,-22,-21,-20,-19,-18,-17,-16,-15,-14,-12,-11,-10,-9,24,25,26,27,28,29,30,31,-8,-31,-30,-29,-28,-27,-26,-25,-24,32,33,34,35,36,37,-23,-37,-36,-35,-34,-33,-32	24	23S ribosomal RNA	23S ribosomal RNA	23S ribosomal RNA	deinococcus radiodurans	deinococcus radiodurans	deinococcus radiodurans	N6(amino)-O2(carbonyl)[2.82]_N1-O2'(hydroxyl)[3.14]		(1,1)	3	7	8	8	0	1	0	0	1	cWS
5dm6.cif1	intra	260	588	X.A.2859.	X.C.1729.	X.G.1743.	WC	19-XIX	cWW	cW-W	II	A|C-G	HC	S	S	LR	LR	SM	AGCAAUG	UCCCCAC	GUGGGGC				23S ribosomal RNA	23S ribosomal RNA	23S ribosomal RNA	deinococcus radiodurans	deinococcus radiodurans	deinococcus radiodurans	O2'(hydroxyl)-O3'[3.22]_O2'(hydroxyl)-O2'(hydroxyl)[2.93]_N3-O2'(hydroxyl)[2.35]		(2,2)	3	4	8	8	1	1	0	0	1		tWW
5dm6.cif1	intra	260	588	X.A.2860.	X.C.1728.	X.G.1744.	WC	19-XIX	cWW	cW-W	I	A|C-G	HC	S	S	LR	LR	SM	GCAAUGU	GUCCCCA	UGGGGCG				23S ribosomal RNA	23S ribosomal RNA	23S ribosomal RNA	deinococcus radiodurans	deinococcus radiodurans	deinococcus radiodurans	O2'(hydroxyl)-O2'(hydroxyl)[2.81]_O2'(hydroxyl)-O2(carbonyl)[3.04]	N1-O2'(hydroxyl)[2.75]_N3-N2(amino)[3.28]	(2,2)	3	4	8	8	1	0	0	0	1		tWS
5dm6.cif1	intra	0	589	X.A.2883.	X.C.2816.	X.G.2830.	WC	19-XIX	cWW	cW-W	I	A|C-G	JC	S	S	LC	LC	SM	CUCAUCA	CUCCCGG	CCGGGUU				23S ribosomal RNA	23S ribosomal RNA	23S ribosomal RNA	deinococcus radiodurans	deinococcus radiodurans	deinococcus radiodurans	O2'(hydroxyl)-O2'(hydroxyl)[2.97]_O2'(hydroxyl)-O2(carbonyl)[2.47]	N1-O2'(hydroxyl)[2.80]_N3-N2(amino)[3.30]	(1,1)	3	3	5	5	0	1	0	0	1		tSS	Multi Loop	Stem
5dm6.cif1	intra	259	586	X.A.2891.	X.G.2630.	X.C.2788.	WC	19-XIX	cWW	cW-W	I	A|G-C	JI	S	S	LC	LC	SM	UCGAGGU	GCAGGAG	CUCCCAC	abAcdeDfgFEChBHiGI	1,2,3,4,5,6,7,8,-7,-6,-5,-4,-3,-2,-1,9,10,11,12,13,14,-13,15,16,17,18,19,20,21,22,23,-22,-21,-20,-19,-18,-17,-16,-15,-14,-12,-11,-10,-9,24,25,26,27,28,29,30,31,-8,-31,-30,-29,-28,-27,-26,-25,-24,32,33,34,35,36,37,-23,-37,-36,-35,-34,-33,-32	32	23S ribosomal RNA	23S ribosomal RNA	23S ribosomal RNA	deinococcus radiodurans	deinococcus radiodurans	deinococcus radiodurans	O3'-O2'(hydroxyl)[2.89]_O2'(hydroxyl)-O2'(hydroxyl)[2.73]_O2'(hydroxyl)-N3[2.85]_N3-N2(amino)[3.10]		(3,2)	4	4	7	7	0	0	0	0	0	cSS
5dm6.cif1	intra	261	590	Y.A.59.	Y.C.32.	Y.G.56.	WC	19-XIX	cWW	cW-W	X	A|C-G	IC	S	S	LC	LC	SM	GUGAAAC	CCACCCC	GUCGUGA				5S ribosomal RNA	5S ribosomal RNA	5S ribosomal RNA	deinococcus radiodurans	deinococcus radiodurans	deinococcus radiodurans	N6(amino)-O2'(hydroxyl)[3.46]		(3,3)	3	3	3	3	1	0	0	0	1
5dm6.cif1	intra	261	590	Y.A.60.	Y.A.31.	Y.U.57.	WC	20-XX	cWW	cW-W	X	A|A-U	IC	S	S	LC	LC	SM	UGAAACA	ACCACCC	UCGUGAA				5S ribosomal RNA	5S ribosomal RNA	5S ribosomal RNA	deinococcus radiodurans	deinococcus radiodurans	deinococcus radiodurans	N6(amino)-N3[3.28]_N1-O2'(hydroxyl)[2.65]		(3,3)	3	3	3	3	1	1	0	0	1	tWS
5dm6.cif1	intra	261	590	Y.A.61.	Y.C.30.	Y.G.58.	WC	19-XIX	cWW	cW-W	X	A|C-G	IC	S	S	LC	LC	SM	GAAACAC	AACCACC	CGUGAAA				5S ribosomal RNA	5S ribosomal RNA	5S ribosomal RNA	deinococcus radiodurans	deinococcus radiodurans	deinococcus radiodurans		N1-N2(amino)[3.32]	(3,3)	3	3	3	3	1	1	0	0	1
5e81.cif1	inter	0	591	13.A.1339.	2K.G.31.	2K.C.41.	WC	19-XIX	cWW	cW-W	I	A|G-C	JC	S	S	LR	LR	SM	CGGAAUC	UCGGGMU	AACCCGA	abAcdCeDBfghGijkJlmLKInoEOpHPNqMQF	1,2,-1,3,4,5,-4,-3,6,-5,-2,7,8,9,10,11,12,13,14,15,-14,-13,-12,-11,-10,-9,-8,16,17,18,19,20,21,-20,22,23,24,25,26,27,28,29,30,-29,-28,-27,-26,-25,-24,-23,-22,-21,-19,-18,-17,-16,31,32,33,34,35,36,-6,-36,37,38,-15,-38,-37,-35,-34,-33,-32,-31,39,40,41,42,43,44,-30,-44,-43,-42,-41,-40,-39,-7	4	16S ribosomal RNA	tRNA-fMet	tRNA-fMet	thermus thermophilus	thermus thermophilus	thermus thermophilus		O2'(hydroxyl)-O2'(hydroxyl)[3.15]_O2'(hydroxyl)-O2(carbonyl)[2.97]	(1,1)	3	10	5	5	1	0	0	0	1	tSS
5e81.cif1	inter	262	592	13.A.1492.	1K.U.35.	4K.A.20.	WC	20-XX	cWW	cW-W	X	A|U-A	IC	S	S	LR	LR	SM	GCGAAGU	CUMUUMA	UGAAGAA	abAcdCeDBfghGijkJlmLKInoEOpHPNqMQF	1,2,-1,3,4,5,-4,-3,6,-5,-2,7,8,9,10,11,12,13,14,15,-14,-13,-12,-11,-10,-9,-8,16,17,18,19,20,21,-20,22,23,24,25,26,27,28,29,30,-29,-28,-27,-26,-25,-24,-23,-22,-21,-19,-18,-17,-16,31,32,33,34,35,36,-6,-36,37,38,-15,-38,-37,-35,-34,-33,-32,-31,39,40,41,42,43,44,-30,-44,-43,-42,-41,-40,-39,-7	2	16S ribosomal RNA	tRNA-Lys	mRNA	thermus thermophilus	escherichia coli	escherichia coli		N3-O2'(hydroxyl)[2.81]	(2,2)	3	4	3	3	1	0	0	0	1
5e81.cif1	inter	262	592	13.A.1493.	1K.U.36.	4K.A.19.	WC	20-XX	cWW	cW-W	I	A|U-A	IC	S	S	LR	LR	SM	CGAAGUC	UMUUMAM	AUGAAGA	abAcdCeDBfghGijkJlmLKInoEOpHPNqMQF	1,2,-1,3,4,5,-4,-3,6,-5,-2,7,8,9,10,11,12,13,14,15,-14,-13,-12,-11,-10,-9,-8,16,17,18,19,20,21,-20,22,23,24,25,26,27,28,29,30,-29,-28,-27,-26,-25,-24,-23,-22,-21,-19,-18,-17,-16,31,32,33,34,35,36,-6,-36,37,38,-15,-38,-37,-35,-34,-33,-32,-31,39,40,41,42,43,44,-30,-44,-43,-42,-41,-40,-39,-7	2	16S ribosomal RNA	tRNA-Lys	mRNA	thermus thermophilus	escherichia coli	escherichia coli	N1-O2'(hydroxyl)[2.99]	O2'(hydroxyl)-O2'(hydroxyl)[2.66]	(2,2)	3	4	3	3	0	0	0	0	0
5e81.cif1	inter	0	593	2K.A.77.	1H.C.2063.	1H.A.2450.	-W	n/a	cWW	cW-W	X	A|C-A	JP	JCJP	JC	SM	LR	SM	ACCANNN	AGACCCC	GAUAACA				tRNA-fMet	23S ribosomal RNA	23S ribosomal RNA	thermus thermophilus	thermus thermophilus	thermus thermophilus		N6(amino)-N3[3.17]_N1-O2'(hydroxyl)[2.82]	(1,1)	3	1	9	8	0	1	0	0	1		tWS
5fdv.cif1	inter	0	594	1A.A.908.	1B.C.79.	1B.G.98.	WC	19-XIX	cWW	cW-W	X	A|C-G	IC	S	S	LR	LR	SM	UGUAGAG	GUACUGG	CUGGGAG				23S ribosomal RNA	5S ribosomal RNA	5S ribosomal RNA	thermus thermophilus	thermus thermophilus	thermus thermophilus	O2'(hydroxyl)-O3'[2.96]_O2'(hydroxyl)-O2'(hydroxyl)[2.91]_N3-O2'(hydroxyl)[2.89]		(1,1)	3	4	8	8	0	0	0	0	0
5fdv.cif1	intra	263	595	1B.A.53.	1B.C.31.	1B.G.51.	WC	19-XIX	cWW	cW-W	X	A|C-G	BC	S	S	LC	LC	SM	GGAAGUG	CACCCGU	ACGGAAG				5S ribosomal RNA	5S ribosomal RNA	5S ribosomal RNA	thermus thermophilus	thermus thermophilus	thermus thermophilus	N6(amino)-O2(carbonyl)[2.55]_N1-O2'(hydroxyl)[2.61]		(4,4)	6	2	4	4	1	0	0	0	1	cWS
5fdv.cif1	intra	263	595	1B.A.57.	1B.A.29.	1B.U.55.	WC	20-XX	cWW	cW-W	X	A|A-U	IC	S	S	LC	LC	SM	GUGAAAC	ACCACCC	AAGUGAA				5S ribosomal RNA	5S ribosomal RNA	5S ribosomal RNA	thermus thermophilus	thermus thermophilus	thermus thermophilus		N7-O2'(hydroxyl)[2.87]_N6(amino)-O2(carbonyl)[3.11]	(4,4)	6	3	3	3	1	0	0	0	1		cHS
5fdv.cif1	intra	263	595	1B.A.57.	1B.C.30.	1B.G.54.	WC	19-XIX	cWW	cW-W	X	A|C-G	IC	S	S	LC	LC	SM	GUGAAAC	CCACCCG	GAAGUGA				5S ribosomal RNA	5S ribosomal RNA	5S ribosomal RNA	thermus thermophilus	thermus thermophilus	thermus thermophilus	N6(amino)-O2(carbonyl)[3.20]_N1-O2'(hydroxyl)[2.94]		(4,4)	6	3	3	3	1	0	0	0	1	cWS
5fdv.cif1	intra	263	595	1B.A.58.	1B.A.29.	1B.U.55.	WC	20-XX	cWW	cW-W	X	A|A-U	IC	S	S	LC	LC	SM	UGAAACG	ACCACCC	AAGUGAA				5S ribosomal RNA	5S ribosomal RNA	5S ribosomal RNA	thermus thermophilus	thermus thermophilus	thermus thermophilus	N6(amino)-N3[3.38]_N1-O2'(hydroxyl)[2.56]		(4,4)	6	3	3	3	1	0	0	0	1	cWS
5fdv.cif1	intra	263	595	1B.A.59.	1B.C.28.	1B.G.56.	WC	19-XIX	cWW	cW-W	X	A|C-G	IC	S	S	LC	LC	SM	GAAACGC	AACCACC	AGUGAAA				5S ribosomal RNA	5S ribosomal RNA	5S ribosomal RNA	thermus thermophilus	thermus thermophilus	thermus thermophilus		N6(amino)-O2'(hydroxyl)[3.25]_N1-N2(amino)[2.98]	(4,4)	6	3	3	3	1	0	0	0	1		tWS
5fjc.cif1	intra	0	596	A.A.12.	A.G.43.	A.C.59.	WC	19-XIX	cWW	cW-W	I	A|G-C	JI	S	S	LR	LR	SM	AAGAGAG	CCGGCAA	GUGCCAA				SAM-I RIBOSWITCH	SAM-I RIBOSWITCH	SAM-I RIBOSWITCH	thermoanaerobacter tengcongensis	thermoanaerobacter tengcongensis	thermoanaerobacter tengcongensis	O2'(hydroxyl)-O2'(hydroxyl)[2.80]_N3-N2(amino)[3.04]	N1-O2'(hydroxyl)[2.61]	(1,1)	3	6	3	3	1	0	0	0	1	cSS		Multi Loop	Stem
5fjc.cif1	intra	0	597	A.A.24.	A.U.64.	A.A.85.	WC	20-XX	cWW	cW-W	X	A|U-A	HP	IP	JI	LR	LR	LR	GUGACUG	AAUUCCU	GAAAGAU				SAM-I RIBOSWITCH	SAM-I RIBOSWITCH	SAM-I RIBOSWITCH	thermoanaerobacter tengcongensis	thermoanaerobacter tengcongensis	thermoanaerobacter tengcongensis		N6(amino)-N3[3.35]_N1-O2'(hydroxyl)[2.74]	(1,1)	3	3	4	3	1	0	1	0	1		tWS
5fjc.cif1	intra	264	598	A.A.61.	A.U.22.	A.G.30.	WB	28-XXVIII	cWW	cW-W	X	A|U-G	IP	S	S	LC	LC	SM	GCCAAUU	GAGUGAC	GGCGCGA	abAB	1,2,3,-2,-1,-3	2	SAM-I RIBOSWITCH	SAM-I RIBOSWITCH	SAM-I RIBOSWITCH	thermoanaerobacter tengcongensis	thermoanaerobacter tengcongensis	thermoanaerobacter tengcongensis		N6(amino)-N3[3.19]_N1-O2'(hydroxyl)[2.61]	(2,2)	3	4	3	3	0	0	0	0	0		cWS
5fjc.cif1	intra	264	598	A.A.62.	A.G.23.	A.C.29.	WC	19-XIX	cWW	cW-W	X	A|G-C	IP	S	S	LC	LC	SM	CCAAUUC	AGUGACU	UGGCGCG	abAB	1,2,3,-2,-1,-3	2	SAM-I RIBOSWITCH	SAM-I RIBOSWITCH	SAM-I RIBOSWITCH	thermoanaerobacter tengcongensis	thermoanaerobacter tengcongensis	thermoanaerobacter tengcongensis	N6(amino)-O2'(hydroxyl)[3.04]_N6(amino)-N3[3.19]_N1-N2(amino)[2.98]		(2,2)	3	4	3	3	0	0	0	0	0	tWS
5ib7.cif1	intra	0	599	3L.A.14.	3L.C.13.	3L.G.22.	WC	19-XIX	cWW	cW-W	X	A|C-G	HC	S	S	LC	LC	SM	CUCAGUU	GCUCAGU	GUAGAGC				tRNALys	tRNALys	tRNALys	escherichia coli	escherichia coli	escherichia coli	O4'-O2'(hydroxyl)[3.30]		(1,1)	3	8	4	4	0	0	0	0	0
5ibb.cif1	inter	265	600	1G.A.1492.	1L.A.35.	4L.U.20.	WC	20-XX	cWW	cW-W	X	A|A-U	IC	S	S	LR	LR	SM	GCGAAGU	CUUACAA	UGGUAAA	abAcdCeDBfgFhijIklKJHmnENoGOMpLP	1,2,3,-2,-1,4,5,6,-5,-4,7,-6,-3,8,9,10,11,12,13,14,15,-14,-13,-12,-11,-10,-9,-8,16,17,18,19,20,21,-20,22,23,24,25,26,27,28,29,30,-29,-28,-27,-26,-25,-24,-23,-22,-21,-19,-18,-17,-16,31,32,33,34,35,36,-7,-36,37,38,-15,-38,-37,-35,-34,-33,-32,-31,39,40,41,42,43,44,-30,-44,-43,-42,-41,-40,-39	3	16S ribosomal RNA	tRNAVal	mRNA	thermus thermophilus	thermus thermophilus	escherichia coli		N3-O2'(hydroxyl)[3.03]	(2,2)	3	4	3	3	1	0	0	0	1
5ibb.cif1	inter	265	600	1G.A.1493.	1L.C.36.	4L.G.19.	WC	19-XIX	cWW	cW-W	I	A|C-G	IC	S	S	LR	LR	SM	CGAAGUC	UUACAAG	AUGGUAA	abAcdCeDBfgFhijIklKJHmnENoGOMpLP	1,2,3,-2,-1,4,5,6,-5,-4,7,-6,-3,8,9,10,11,12,13,14,15,-14,-13,-12,-11,-10,-9,-8,16,17,18,19,20,21,-20,22,23,24,25,26,27,28,29,30,-29,-28,-27,-26,-25,-24,-23,-22,-21,-19,-18,-17,-16,31,32,33,34,35,36,-7,-36,37,38,-15,-38,-37,-35,-34,-33,-32,-31,39,40,41,42,43,44,-30,-44,-43,-42,-41,-40,-39	3	16S ribosomal RNA	tRNAVal	mRNA	thermus thermophilus	thermus thermophilus	escherichia coli	N1-O2'(hydroxyl)[2.83]	O2'(hydroxyl)-O2'(hydroxyl)[2.75]_N3-N2(amino)[3.40]	(2,2)	3	4	3	3	0	0	0	0	0		cSS
5ibb.cif1	intra	0	601	1L.A.69.	1L.G.5.	1L.C.68.	WC	19-XIX	cWW	cW-W	X	A|G-C	JCJP	JC	JCJP	SM	SM	SM	AUCACCC	GGUGAUU	CAUCACC				tRNAVal	tRNAVal	tRNAVal	thermus thermophilus	thermus thermophilus	thermus thermophilus	N6(amino)*N2(amino)[2.80]	N6(amino)-O2(carbonyl)[3.45]	(1,1)	2	7	7	7	0	1	1	0	1	tHW	cHS
5ibb.cif1	intra	0	602	1L.A.73.	1L.G.1.	1L.C.72.	WC	19-XIX	cWW	cW-W	X	A|G-C	JP	S	S	LC	LC	SM	CCCACCA	NNNGGGU	ACCCACC	abAcdCeDBfgFhijIklKJHmnENoGOMpLP	1,2,3,-2,-1,4,5,6,-5,-4,7,-6,-3,8,9,10,11,12,13,14,15,-14,-13,-12,-11,-10,-9,-8,16,17,18,19,20,21,-20,22,23,24,25,26,27,28,29,30,-29,-28,-27,-26,-25,-24,-23,-22,-21,-19,-18,-17,-16,31,32,33,34,35,36,-7,-36,37,38,-15,-38,-37,-35,-34,-33,-32,-31,39,40,41,42,43,44,-30,-44,-43,-42,-41,-40,-39	1	tRNAVal	tRNAVal	tRNAVal	thermus thermophilus	thermus thermophilus	thermus thermophilus	N1-N2(amino)[3.02]		(1,1)	3	4	2	2	0	1	0	0	1	tWW
5j7l.cif1	intra	266	603	AA.A.2.	AA.C.613.	AA.G.627.	WC	19-XIX	cWW	cW-W	II	A|C-G	JI	S	S	LR	LR	SM	NNAAAUU	UCCCCGG	CUGGGAA				16S rRNA	16S rRNA	16S rRNA	escherichia coli	escherichia coli	escherichia coli	O2'(hydroxyl)-O2'(hydroxyl)[2.76]_N3-O2'(hydroxyl)[2.92]		(2,2)	3	8	6	6	0	0	0	0	0		tW.
5j7l.cif1	intra	266	603	AA.A.3.	AA.C.612.	AA.G.628.	WC	19-XIX	cWW	cW-W	I	A|C-G	JI	S	S	LR	LR	SM	NAAAUUG	AUCCCCG	UGGGAAC				16S rRNA	16S rRNA	16S rRNA	escherichia coli	escherichia coli	escherichia coli	O2'(hydroxyl)-O2'(hydroxyl)[2.89]_O2'(hydroxyl)-O2(carbonyl)[3.21]	N1-O2'(hydroxyl)[2.67]_N3-N2(amino)[3.03]	(2,2)	3	8	6	6	0	0	0	0	0		tSS
5j7l.cif1	intra	267	604	AA.A.51.	AA.G.113.	AA.C.314.	WC	19-XIX	cWW	cW-W	X	A|G-C	JC	S	S	LR	LR	SM	CUAACAC	CGGGUGA	CCACACU				16S rRNA	16S rRNA	16S rRNA	escherichia coli	escherichia coli	escherichia coli		N1-O2'(hydroxyl)[2.85]	(3,2)	5	5	3	3	0	1	1	0	1
5j7l.cif1	intra	267	604	AA.A.51.	AA.U.114.	AA.A.313.	WC	20-XX	cWW	cW-W	X	A|U-A	JC	S	S	LR	LR	SM	CUAACAC	GGGUGAG	GCCACAC				16S rRNA	16S rRNA	16S rRNA	escherichia coli	escherichia coli	escherichia coli	N7-O2'(hydroxyl)[2.74]_N6(amino)-O2(carbonyl)[2.96]		(3,2)	5	5	3	3	0	1	1	0	1	cHS
5j7l.cif1	intra	268	605	AA.A.71.	AA.G.69.	AA.C.99.	WC	19-XIX	cWW	cW-W	X	A|G-C	BC	S	S	LC	LC	SM	GGUAACA	ACGGUAA	UGACGAG				16S rRNA	16S rRNA	16S rRNA	escherichia coli	escherichia coli	escherichia coli		N6(amino)-O2(carbonyl)[2.77]_N1-O2'(hydroxyl)[2.78]	(2,2)	3	2	2	2	1	1	1	0	1		cWS
5j7l.cif1	intra	268	605	AA.A.71.	AA.U.70.	AA.A.98.	WC	20-XX	cWW	cW-W	X	A|U-A	BC	S	S	LC	LC	SM	GGUAACA	CGGUAAC	CUGACGA				16S rRNA	16S rRNA	16S rRNA	escherichia coli	escherichia coli	escherichia coli	N6(amino)-O2(carbonyl)[2.79]		(2,2)	3	2	2	2	1	1	1	0	1	cHS
5j7l.cif1	intra	268	605	AA.A.72.	AA.U.70.	AA.A.98.	WC	20-XX	cWW	cW-W	X	A|U-A	BC	S	S	LC	LC	SM	GUAACAG	CGGUAAC	CUGACGA				16S rRNA	16S rRNA	16S rRNA	escherichia coli	escherichia coli	escherichia coli		N6(amino)-N3[3.03]	(2,2)	3	2	2	2	1	1	1	0	1		tWS
5j7l.cif1	intra	0	606	AA.A.78.	AA.A.77.	AA.U.92.	WC	20-XX	cWW	cW-W	X	A|A-U	S	S	S	SM	SM	SM	GGAAGAA	AGGAAGA	UCUUUGC				16S rRNA	16S rRNA	16S rRNA	escherichia coli	escherichia coli	escherichia coli	O4'-O2'(hydroxyl)[3.38]	N6(amino)-O2(carbonyl)[2.87]	(1,1)	2	3	3	3	1	0	0	0	1		cWW
5j7l.cif1	intra	267	604	AA.A.116.	AA.U.114.	AA.A.313.	WC	20-XX	cWW	cW-W	X	A|U-A	JC	S	S	LC	LC	SM	GUGAGUA	GGGUGAG	GCCACAC				16S rRNA	16S rRNA	16S rRNA	escherichia coli	escherichia coli	escherichia coli		N6(amino)-N3[2.96]_N1-O2'(hydroxyl)[2.84]	(3,2)	5	6	3	3	1	1	0	0	1		tWS
5j7l.cif1	intra	269	607	AA.A.151.	AA.C.67.	AA.G.102.	WC	19-XIX	cWW	cW-W	II	A|C-G	IC	S	S	LR	LR	SM	GAUAACU	GAACGGU	CGAGUGG				16S rRNA	16S rRNA	16S rRNA	escherichia coli	escherichia coli	escherichia coli		O2'(hydroxyl)-O2'(hydroxyl)[2.74]_N1-N2(amino)[3.31]_N3-O2'(hydroxyl)[2.76]	(5,4)	7	5	2	2	0	0	1	0	1		cWS
5j7l.cif1	intra	270	608	AA.A.160.	AA.C.342.	AA.G.347.	WC	19-XIX	cWW	cW-W	X	A|C-G	HC	S	S	LR	LR	SM	UGGAAAC	CUCCUAC	ACGGGAG				16S rRNA	16S rRNA	16S rRNA	escherichia coli	escherichia coli	escherichia coli		N6(amino)-N3[3.32]_N1-N2(amino)[3.18]	(2,1)	3	4	4	4	1	0	0	0	1		tWS
5j7l.cif1	intra	270	608	AA.A.161.	AA.C.342.	AA.G.347.	WC	19-XIX	cWW	cW-W	X	A|C-G	HC	S	S	LR	LR	SM	GGAAACG	CUCCUAC	ACGGGAG				16S rRNA	16S rRNA	16S rRNA	escherichia coli	escherichia coli	escherichia coli		N6(amino)-O2'(hydroxyl)[3.17]_N1-O2'(hydroxyl)[2.73]	(2,1)	3	4	4	4	1	0	0	0	1
5j7l.cif1	intra	269	607	AA.A.171.	AA.C.67.	AA.G.102.	WC	19-XIX	cWW	cW-W	II	A|C-G	IC	S	S	LR	LR	SM	GCUAAUA	GAACGGU	CGAGUGG				16S rRNA	16S rRNA	16S rRNA	escherichia coli	escherichia coli	escherichia coli	O2'(hydroxyl)-O3'[3.21]_O2'(hydroxyl)-O2'(hydroxyl)[2.83]_N3-O2'(hydroxyl)[2.70]		(5,4)	7	6	2	2	0	1	0	0	1
5j7l.cif1	intra	269	607	AA.A.172.	AA.A.66.	AA.U.103.	WC	20-XX	cWW	cW-W	I	A|A-U	IC	S	S	LR	LR	SM	CUAAUAC	CGAACGG	GAGUGGC				16S rRNA	16S rRNA	16S rRNA	escherichia coli	escherichia coli	escherichia coli	O2'(hydroxyl)-O2'(hydroxyl)[3.03]	N1-O2'(hydroxyl)[2.90]	(5,4)	7	6	2	2	0	1	0	0	1
5j7l.cif1	intra	271	609	AA.A.195.	AA.G.141.	AA.C.222.	WC	19-XIX	cWW	cW-W	II	A|G-C	JC	S	S	LC	LC	SM	ACCAAAG	GAUGGAG	UGCCAUC				16S rRNA	16S rRNA	16S rRNA	escherichia coli	escherichia coli	escherichia coli		O2'(hydroxyl)-O2'(hydroxyl)[2.83]_N3-O2'(hydroxyl)[2.75]	(2,2)	3	4	7	7	0	1	0	0	1
5j7l.cif1	intra	271	609	AA.A.196.	AA.G.142.	AA.C.221.	WC	19-XIX	cWW	cW-W	I	A|G-C	JC	S	S	LC	LC	SM	CCAAAGA	AUGGAGG	UUGCCAU				16S rRNA	16S rRNA	16S rRNA	escherichia coli	escherichia coli	escherichia coli	N1-O2'(hydroxyl)[2.78]_N3-N2(amino)[2.96]	O2'(hydroxyl)-O2'(hydroxyl)[2.75]	(2,2)	3	4	7	7	0	0	0	0	0	tWS
5j7l.cif1	intra	0	610	AA.A.262.	AA.A.131.	AA.U.231.	WC	20-XX	cWW	cW-W	II	A|A-U	HC	S	S	LR	LR	SM	GGUAACG	GAAACUG	AUGUGCC				16S rRNA	16S rRNA	16S rRNA	escherichia coli	escherichia coli	escherichia coli	O2'(hydroxyl)-O3'[3.03]_O2'(hydroxyl)-O2'(hydroxyl)[2.78]_N3-O2'(hydroxyl)[2.69]		(1,1)	3	7	2	2	1	0	1	0	1
5j7l.cif1	intra	0	611	AA.A.282.	AA.G.247.	AA.C.277.	WC	19-XIX	cWW	cW-W	I	A|G-C	IC	S	S	LC	LC	SM	ACGAUCC	UUAGCUA	AGGCGAC				16S rRNA	16S rRNA	16S rRNA	escherichia coli	escherichia coli	escherichia coli	N1-O2'(hydroxyl)[2.75]_N3-N2(amino)[3.08]	O2'(hydroxyl)-O2'(hydroxyl)[3.26]	(1,1)	3	6	3	3	0	0	0	0	0	tSS
5j7l.cif1	intra	267	604	AA.A.353.	AA.G.113.	AA.C.314.	WC	19-XIX	cWW	cW-W	I	A|G-C	JC	S	S	LC	LC	SM	GGCAGCA	CGGGUGA	CCACACU				16S rRNA	16S rRNA	16S rRNA	escherichia coli	escherichia coli	escherichia coli	O3'-O2'(hydroxyl)[3.36]_O2'(hydroxyl)-O2'(hydroxyl)[2.84]_O2'(hydroxyl)-N3[2.68]_N3-N2(amino)[3.06]	N1-O2'(hydroxyl)[3.48]	(3,2)	5	3	3	3	0	1	0	0	1	cSS	tWS
5j7l.cif1	intra	272	612	AA.A.373.	AA.C.370.	AA.G.391.	WC	19-XIX	cWW	cW-W	X	A|C-G	IC	S	S	LC	LC	SM	CACAAUG	UUGCACA	GAUGCAG				16S rRNA	16S rRNA	16S rRNA	escherichia coli	escherichia coli	escherichia coli		N6(amino)-N3[2.93]_N1-O2'(hydroxyl)[2.91]	(3,2)	4	4	3	3	0	0	0	0	0		cWS
5j7l.cif1	intra	272	612	AA.A.374.	AA.A.371.	AA.U.390.	WC	20-XX	cWW	cW-W	X	A|A-U	IC	S	S	LC	LC	SM	ACAAUGG	UGCACAA	UGAUGCA				16S rRNA	16S rRNA	16S rRNA	escherichia coli	escherichia coli	escherichia coli		N6(amino)-O2(carbonyl)[2.97]_N1-O2'(hydroxyl)[2.80]	(3,2)	4	4	3	3	0	0	0	0	0		cWS
5j7l.cif1	intra	272	612	AA.A.482.	AA.C.370.	AA.G.391.	WC	19-XIX	cWW	cW-W	I	A|C-G	IC	S	S	LR	LR	SM	UUGACGU	UUGCACA	GAUGCAG				16S rRNA	16S rRNA	16S rRNA	escherichia coli	escherichia coli	escherichia coli	O2'(hydroxyl)-O2'(hydroxyl)[2.79]_O2'(hydroxyl)-O2(carbonyl)[2.89]		(3,2)	4	10	3	3	0	0	1	0	1
5j7l.cif1	intra	273	613	AA.A.509.	AA.A.502.	AA.U.543.	WC	20-XX	cWW	cW-W	II	A|A-U	HP	S	S	LR	LR	SM	GCUAACU	AGCACCG	GGGUGCA				16S rRNA	16S rRNA	16S rRNA	escherichia coli	escherichia coli	escherichia coli		O2'(hydroxyl)-O2'(hydroxyl)[2.73]_N3-O2'(hydroxyl)[2.73]	(2,2)	3	3	5	5	0	0	1	0	1		cSS
5j7l.cif1	intra	273	613	AA.A.510.	AA.C.503.	AA.G.542.	WC	19-XIX	cWW	cW-W	I	A|C-G	HP	S	S	LR	LR	SM	CUAACUC	GCACCGG	AGGGUGC				16S rRNA	16S rRNA	16S rRNA	escherichia coli	escherichia coli	escherichia coli	N1-O2'(hydroxyl)[2.75]	O2'(hydroxyl)-O2'(hydroxyl)[2.87]_N3-N2(amino)[2.95]	(2,2)	3	3	5	5	0	0	1	0	1		cSS
5j7l.cif1	intra	0	614	AA.A.535.	AA.C.522.	AA.G7M.527.	WC	19-XIX	cWW	cW-W	X	A|C-g	IC	S	S	LC	LC	SM	AAUACGG	CAGCAGC	GCCMCGG	abAB	1,2,3,-1,-3,-2	3	16S rRNA	16S rRNA	16S rRNA	escherichia coli	escherichia coli	escherichia coli		N1-O2'(hydroxyl)[2.64]	(1,1)	3	7	2	2	0	1	0	1	1		tWS
5j7l.cif1	intra	274	615	AA.A.572.	AA.A.19.	AA.U.916.	WC	20-XX	cWW	cW-W	I	A|A-U	JP	S	S	LR	LR	SM	CGUAAAG	AUCAUGG	AAAUGAA	abAB	1,2,-1,-2	2	16S rRNA	16S rRNA	16S rRNA	escherichia coli	escherichia coli	escherichia coli	N1-O2'(hydroxyl)[2.80]	O2'(hydroxyl)-O2'(hydroxyl)[2.73]	(2,2)	4	5	3	3	1	0	0	0	1
5j7l.cif1	intra	275	616	AA.A.573.	AA.G.567.	AA.C.883.	WC	19-XIX	cWW	cW-W	II	A|G-C	JP	S	S	LR	LR	SM	GUAAAGC	CUGGGCG	CGCCUGG				16S rRNA	16S rRNA	16S rRNA	escherichia coli	escherichia coli	escherichia coli		O2'(hydroxyl)-O2'(hydroxyl)[2.77]_N3-O2'(hydroxyl)[2.78]	(2,2)	3	5	3	3	1	0	0	0	1		cSS
5j7l.cif1	intra	275	616	AA.A.574.	AA.G.568.	AA.C.882.	WC	19-XIX	cWW	cW-W	I	A|G-C	JP	S	S	LR	LR	SM	UAAAGCG	UGGGCGU	CCGCCUG				16S rRNA	16S rRNA	16S rRNA	escherichia coli	escherichia coli	escherichia coli	N1-O2'(hydroxyl)[2.73]_N3-N2(amino)[2.86]	O2'(hydroxyl)-O2'(hydroxyl)[2.72]_O2'(hydroxyl)-O2(carbonyl)[3.17]	(2,2)	3	5	3	3	0	0	0	0	0	tSS
5j7l.cif1	intra	276	617	AA.A.607.	AA.U.291.	AA.A.309.	WC	20-XX	cWW	cW-W	X	A|U-A	IC	S	S	LR	LR	SM	GUGAAAU	AGCUGGU	ACCAGCC				16S rRNA	16S rRNA	16S rRNA	escherichia coli	escherichia coli	escherichia coli		N6(amino)-N3[3.03]_N1-O2'(hydroxyl)[2.65]	(2,2)	3	6	4	4	1	0	0	0	1		cWS
5j7l.cif1	intra	276	617	AA.A.608.	AA.G.292.	AA.C.308.	WC	19-XIX	cWW	cW-W	X	A|G-C	IC	S	S	LR	LR	SM	UGAAAUC	GCUGGUC	GACCAGC				16S rRNA	16S rRNA	16S rRNA	escherichia coli	escherichia coli	escherichia coli	N6(amino)-O2'(hydroxyl)[2.79]_N6(amino)-N3[3.00]_N1-N2(amino)[3.02]		(2,2)	3	6	4	4	1	0	0	0	1	tWS
5j7l.cif1	intra	277	618	AA.A.621.	AA.G.41.	AA.C.401.	WC	19-XIX	cWW	cW-W	II	A|G-C	HC	S	S	LR	LR	SM	CUCAACC	GGCGGCA	UGCCGCG				16S rRNA	16S rRNA	16S rRNA	escherichia coli	escherichia coli	escherichia coli		O2'(hydroxyl)-O3'[3.10]_O2'(hydroxyl)-O2'(hydroxyl)[2.69]_N3-O2'(hydroxyl)[2.65]	(2,2)	3	5	6	6	0	0	0	0	0	tW.	cSS
5j7l.cif1	intra	277	618	AA.A.622.	AA.G.42.	AA.C.400.	WC	19-XIX	cWW	cW-W	I	A|G-C	HC	S	S	LR	LR	SM	UCAACCU	GCGGCAG	AUGCCGC				16S rRNA	16S rRNA	16S rRNA	escherichia coli	escherichia coli	escherichia coli	N1-O2'(hydroxyl)[2.80]_N3-N2(amino)[3.12]	O2'(hydroxyl)-O2'(hydroxyl)[3.13]_O2'(hydroxyl)-O2(carbonyl)[3.33]	(2,2)	3	5	6	6	0	0	0	0	0	tSS
5j7l.cif1	intra	0	619	AA.A.642.	AA.U.598.	AA.A.640.	WC	20-XX	cWW	cW-W	X	A|U-A	BC	S	S	LC	LC	SM	GAUACUG	AAGUCAG	CUGAUAC				16S rRNA	16S rRNA	16S rRNA	escherichia coli	escherichia coli	escherichia coli	N6(amino)-O2(carbonyl)[2.84]		(1,1)	3	2	8	8	0	0	0	0	0	cW.
5j7l.cif1	intra	278	620	AA.A.695.	AA.G.786.	AA.C.796.	WC	19-XIX	cWW	cW-W	X	A|G-C	HC	S	S	LR	LR	SM	UGAAAUG	CAGGAUU	UACCCUG				16S rRNA	16S rRNA	16S rRNA	escherichia coli	escherichia coli	escherichia coli	N1-N2(amino)[2.91]		(2,2)	3	8	4	4	1	0	0	0	1	cWS
5j7l.cif1	intra	278	620	AA.A.696.	AA.G.785.	AA.C.797.	WC	19-XIX	cWW	cW-W	X	A|G-C	HC	S	S	LR	LR	SM	GAAAUGC	ACAGGAU	ACCCUGG				16S rRNA	16S rRNA	16S rRNA	escherichia coli	escherichia coli	escherichia coli		N6(amino)-O2'(hydroxyl)[3.17]_N1-O2'(hydroxyl)[2.75]	(2,2)	3	8	4	4	1	0	0	0	1
5j7l.cif1	intra	0	621	AA.A.704.	AA.G.688.	AA.C.699.	WC	19-XIX	cWW	cW-W	I	A|G-C	IC	S	S	LC	LC	SM	UAGAGAU	GUAGCGG	AUGCGUA				16S rRNA	16S rRNA	16S rRNA	escherichia coli	escherichia coli	escherichia coli	N1-O2'(hydroxyl)[2.77]_N3-N2(amino)[3.27]		(1,1)	3	6	2	2	1	0	0	0	1	tSS
5j7l.cif1	intra	279	622	AA.A.728.	AA.C.578.	AA.G.763.	WC	19-XIX	cWW	cW-W	II	A|C-G	HC	S	S	LR	LR	SM	GCGAAGG	GCGCACG	GGUGCGA				16S rRNA	16S rRNA	16S rRNA	escherichia coli	escherichia coli	escherichia coli	O2'(hydroxyl)-O3'[3.07]_O2'(hydroxyl)-O2'(hydroxyl)[2.99]_N3-O2'(hydroxyl)[2.74]		(2,2)	3	4	4	4	1	0	0	0	1
5j7l.cif1	intra	279	622	AA.A.729.	AA.G.577.	AA.C.764.	WC	19-XIX	cWW	cW-W	I	A|G-C	HC	S	S	LR	LR	SM	CGAAGGC	AGCGCAC	GUGCGAA				16S rRNA	16S rRNA	16S rRNA	escherichia coli	escherichia coli	escherichia coli	O2'(hydroxyl)-O2'(hydroxyl)[3.23]_N3-N2(amino)[3.22]	N1-O2'(hydroxyl)[2.79]	(2,2)	3	4	4	4	0	0	0	0	0	cSS
5j7l.cif1	intra	280	623	AA.A.766.	AA.C.1510.	AA.G.1525.	WC	19-XIX	cWW	cW-W	II	A|C-G	JP	S	S	LR	LR	SM	GCGAAAG	AACCGUA	UGCGGUU				16S rRNA	16S rRNA	16S rRNA	escherichia coli	escherichia coli	escherichia coli		N1-N2(amino)[3.22]_N3-O2'(hydroxyl)[3.22]	(2,2)	3	4	9	9	1	0	0	0	1		cWS
5j7l.cif1	intra	280	623	AA.A.767.	AA.G.1511.	AA.C.1524.	WC	19-XIX	cWW	cW-W	I	A|G-C	JP	S	S	LR	LR	SM	CGAAAGC	ACCGUAG	CUGCGGU				16S rRNA	16S rRNA	16S rRNA	escherichia coli	escherichia coli	escherichia coli	N3-N2(amino)[2.97]	O3'-O2'(hydroxyl)[2.83]_O2'(hydroxyl)-O2'(hydroxyl)[2.84]_O2'(hydroxyl)-O2(carbonyl)[2.65]	(2,2)	3	4	9	9	1	0	0	0	1	tSS
5j7l.cif1	intra	0	624	AA.A.777.	AA.A.676.	AA.G.714.	IM	08-VIII	cWW	cW-W	X	A|A-G	BC	JC	JC	LR	LR	SM	GGGAGCA	AGAAUUC	GAGGAAU				16S rRNA	16S rRNA	16S rRNA	escherichia coli	escherichia coli	escherichia coli		N3-N2(amino)[2.97]	(1,1)	3	3	5	12	1	1	0	0	1
5j7l.cif1	intra	274	615	AA.A.864.	AA.C.18.	AA.G.917.	WC	19-XIX	cWW	cW-W	I	A|C-G	HPJP	S	S	LR	LR	SM	GCUAACG	GAUCAUG	AAUGAAU	abAB	1,2,-1,-2	2	16S rRNA	16S rRNA	16S rRNA	escherichia coli	escherichia coli	escherichia coli	O2'(hydroxyl)-O2'(hydroxyl)[3.11]	N1-O2'(hydroxyl)[2.92]_N3-N2(amino)[2.93]	(2,2)	4	2	3	3	0	0	1	0	1		tSS
5j7l.cif1	intra	0	625	AA.A.873.	AA.C.862.	AA.G.867.	WC	19-XIX	cWW	cW-W	I	A|C-G	JC	S	S	LC	LC	SM	UUAAGUC	GAGCUAA	AACGCGU	abAB	1,2,3,-1,-3,-2	3	16S rRNA	16S rRNA	16S rRNA	escherichia coli	escherichia coli	escherichia coli		N1-O2'(hydroxyl)[2.72]_N3-N2(amino)[3.55]	(1,1)	3	5	2	2	0	0	0	0	0		tWS
5j7l.cif1	intra	0	626	AA.A.900.	AA.G.769.	AA.C.810.	WC	19-XIX	cWW	cW-W	X	A|G-C	HC	S	S	LR	LR	SM	CGCAAGG	AAAGCGU	ACGCCGU				16S rRNA	16S rRNA	16S rRNA	escherichia coli	escherichia coli	escherichia coli	N1-N2(amino)[3.14]		(1,1)	3	4	6	6	1	0	0	0	1	cWS
5j7l.cif1	intra	0	627	AA.A.909.	AA.A.1413.	AA.G.1487.	IM	08-VIII	cWW	cW-W	X	A|A-G	IC	IC	IC	LR	LR	SM	AAAACUC	ACCAUGG	CUGGGGU				16S rRNA	16S rRNA	16S rRNA	escherichia coli	escherichia coli	escherichia coli	O2'(hydroxyl)-O3'[3.46]_O2'(hydroxyl)-O2'(hydroxyl)[2.83]_N3-O2'(hydroxyl)[2.73]		(1,1)	3	4	1	1	0	0	0	0	0
5j7l.cif1	intra	0	628	AA.A.913.	AA.U.12.	AA.G.22.	WB	28-XXVIII	cWW	cW-W	I	A|U-G	JP	S	S	LC	LC	SM	CUCAAAU	GAGUUUG	AUGGCUC	abAB	1,2,-1,-2	1	16S rRNA	16S rRNA	16S rRNA	escherichia coli	escherichia coli	escherichia coli		N1-O2'(hydroxyl)[2.64]_N3-N2(amino)[3.24]	(1,1)	3	3	4	4	0	0	0	0	0		tSS
5j7l.cif1	intra	281	629	AA.A.958.	AA.C.985.	AA.G.1220.	WC	19-XIX	cWW	cW-W	II	A|C-G	JC	S	S	LC	LC	SM	UUUAAUU	UACCUGG	CCAGGGC				16S rRNA	16S rRNA	16S rRNA	escherichia coli	escherichia coli	escherichia coli	O2'(hydroxyl)-O3'[2.91]_O2'(hydroxyl)-O2'(hydroxyl)[3.06]_N3-O2'(hydroxyl)[2.75]		(2,2)	3	6	7	7	0	0	0	0	0
5j7l.cif1	intra	281	629	AA.A.959.	AA.C.984.	AA.G.1221.	WC	19-XIX	cWW	cW-W	I	A|C-G	JC	S	S	LC	LC	SM	UUAAUUC	UUACCUG	CAGGGCU				16S rRNA	16S rRNA	16S rRNA	escherichia coli	escherichia coli	escherichia coli	O2'(hydroxyl)-O2'(hydroxyl)[2.70]	N1-O2'(hydroxyl)[2.81]_N3-N2(amino)[2.99]	(2,2)	3	6	7	7	0	0	0	0	0		tWS
5j7l.cif1	intra	0	630	AA.A.996.	AA.G.993.	AA.C.1045.	WC	19-XIX	cWW	cW-W	X	A|G-C	JC	JC	JC	SM	SM	SM	GACAUCC	CUUGACA	AGACAGG				16S rRNA	16S rRNA	16S rRNA	escherichia coli	escherichia coli	escherichia coli	N6(amino)*N2(amino)[3.14]	N6(amino)-O2(carbonyl)[3.34]_N1-O2'(hydroxyl)[2.99]	(1,1)	2	6	6	2	0	0	0	0	0	cH.	cWS
5j7l.cif1	intra	0	631	AA.A.1080.	AA.A.16.	AA.A.919.	NA	n/a	cWW	cW-W	I	A|A-A	HC	HP	JI	LR	LR	LR	GUGAAAU	UUGAUCA	UGAAUUG				16S rRNA	16S rRNA	16S rRNA	escherichia coli	escherichia coli	escherichia coli	O2'(hydroxyl)-O2'(hydroxyl)[2.92]_O2'(hydroxyl)-N3[2.75]	N1-O2'(hydroxyl)[2.74]	(1,1)	3	4	4	2	1	0	0	0	1	cSW	tWS
5j7l.cif1	intra	0	632	AA.A.1101.	AA.G.1074.	AA.U.1083.	WB	28-XXVIII	cWW	cW-W	I	A|G-U	JC	S	S	LC	LC	SM	CGCAACG	CGUGUUG	AAAUGUU				16S rRNA	16S rRNA	16S rRNA	escherichia coli	escherichia coli	escherichia coli	N1-O2'(hydroxyl)[2.67]_N3-N2(amino)[3.26]		(1,1)	3	3	3	3	1	0	0	0	1	t.S
5j7l.cif1	intra	0	633	AA.A.1130.	AA.C.1128.	AA.G.1144.	WC	19-XIX	cWW	cW-W	X	A|C-G	BC	S	S	LC	LC	SM	GCCAGCG	UUGCCAG	CGGGAAC				16S rRNA	16S rRNA	16S rRNA	escherichia coli	escherichia coli	escherichia coli		N6(amino)-N3[3.17]_N1-O2'(hydroxyl)[2.79]	(1,1)	3	2	2	2	0	0	0	0	0		tWS
5j7l.cif1	intra	282	634	AA.A.1167.	AA.G.1088.	AA.C.1097.	WC	19-XIX	cWW	cW-W	X	A|G-C	HC	S	S	LR	LR	SM	GUGAUAA	UUGGGUU	GUCCCGC				16S rRNA	16S rRNA	16S rRNA	escherichia coli	escherichia coli	escherichia coli	N6(amino)-N3[3.03]_N1-O2'(hydroxyl)[3.52]		(3,2)	3	5	3	3	1	0	0	0	1	cWS
5j7l.cif1	intra	282	634	AA.A.1169.	AA.G.1088.	AA.C.1097.	WC	19-XIX	cWW	cW-W	II	A|G-C	HC	S	S	LR	LR	SM	GAUAAAC	UUGGGUU	GUCCCGC				16S rRNA	16S rRNA	16S rRNA	escherichia coli	escherichia coli	escherichia coli		O2'(hydroxyl)-O2'(hydroxyl)[2.80]_N3-O2'(hydroxyl)[3.18]	(3,2)	3	5	3	3	0	0	0	0	0		cSS
5j7l.cif1	intra	282	634	AA.A.1170.	AA.G.1089.	AA.C.1096.	WC	19-XIX	cWW	cW-W	I	A|G-C	HC	S	S	LR	LR	SM	AUAAACU	UGGGUUA	AGUCCCG				16S rRNA	16S rRNA	16S rRNA	escherichia coli	escherichia coli	escherichia coli	N1-O2'(hydroxyl)[3.49]_N3-N2(amino)[3.33]	O3'-O2'(hydroxyl)[3.28]_O2'(hydroxyl)-O2'(hydroxyl)[2.87]_O2'(hydroxyl)-O2(carbonyl)[2.82]	(3,2)	3	5	3	3	0	0	0	0	0	tSS
5j7l.cif1	intra	0	635	AA.A.1213.	AA.C.990.	AA.G.1215.	WC	19-XIX	cWW	cW-W	X	A|C-G	JC	S	S	LC	LC	SM	CUUACGA	GGUCUUG	UACGACC				16S rRNA	16S rRNA	16S rRNA	escherichia coli	escherichia coli	escherichia coli		O2'(hydroxyl)-N7[2.79]	(1,1)	3	4	7	7	0	0	1	1	1
5j7l.cif1	intra	0	636	AA.A.1227.	AA.G.954.	AA.C.1226.	WC	19-XIX	cWW	cW-W	X	A|G-C	BC	S	S	LC	LC	SM	UACACAC	GUGGUUU	CUACACA				16S rRNA	16S rRNA	16S rRNA	escherichia coli	escherichia coli	escherichia coli	N7-N2(amino)[3.51]_N6(amino)-N3[3.45]		(1,1)	3	1	2	2	0	0	0	0	0	tHS
5j7l.cif1	intra	0	637	AA.A.1238.	AA.G.1241.	AA.C.1296.	WC	19-XIX	cWW	cW-W	X	A|G-C	JC	S	S	LC	LC	SM	UACAAUG	AAUGGCG	CGUCGUA				16S rRNA	16S rRNA	16S rRNA	escherichia coli	escherichia coli	escherichia coli	N1-N2(amino)[3.33]_N3-O2'(hydroxyl)[2.78]		(1,1)	3	5	7	7	0	0	0	0	0
5j7l.cif1	intra	283	638	AA.A.1251.	AA.G.1353.	AA.C.1369.	WC	19-XIX	cWW	cW-W	X	A|G-C	IC	S	S	LR	LR	SM	ACAAAGA	AUCGUGG	CCACGGU				16S rRNA	16S rRNA	16S rRNA	escherichia coli	escherichia coli	escherichia coli		O2'(hydroxyl)-O3'[2.74]_O2'(hydroxyl)-O2'(hydroxyl)[2.90]_N3-O2'(hydroxyl)[2.75]	(3,3)	4	5	7	7	0	0	0	0	0
5j7l.cif1	intra	283	638	AA.A.1251.	AA.U.1354.	AA.A.1368.	WC	20-XX	cWW	cW-W	X	A|U-A	IC	S	S	LR	LR	SM	ACAAAGA	UCGUGGA	GCCACGG				16S rRNA	16S rRNA	16S rRNA	escherichia coli	escherichia coli	escherichia coli	N6(amino)-O2'(hydroxyl)[3.37]_N1-O2'(hydroxyl)[2.91]		(3,3)	4	5	7	7	0	0	0	0	0
5j7l.cif1	intra	0	639	AA.A.1269.	AA.G.1312.	AA.C.1325.	WC	19-XIX	cWW	cW-W	I	A|G-C	HC	S	S	LR	LR	SM	GCGAGAG	GGAGUCU	CGACUCC				16S rRNA	16S rRNA	16S rRNA	escherichia coli	escherichia coli	escherichia coli	N1-O2'(hydroxyl)[2.71]_N3-N2(amino)[3.35]	O2'(hydroxyl)-O2'(hydroxyl)[2.94]	(1,1)	3	4	7	7	1	0	0	0	1	tWS
5j7l.cif1	intra	0	640	AA.A.1280.	AA.G.1124.	AA.C.1149.	WC	19-XIX	cWW	cW-W	X	A|G-C	IC	S	S	LR	LR	SM	CGGACCU	UUUGUUG	ACUCAAA				16S rRNA	16S rRNA	16S rRNA	escherichia coli	escherichia coli	escherichia coli		N6(amino)-O2(carbonyl)[2.84]_N1-O2'(hydroxyl)[2.80]	(1,1)	3	4	7	7	0	0	0	0	0		cWS
5j7l.cif1	intra	283	638	AA.A.1287.	AA.C.1352.	AA.G.1370.	WC	19-XIX	cWW	cW-W	X	A|C-G	IC	S	S	LR	LR	SM	CAUAAAG	AAUCGUG	CACGGUG				16S rRNA	16S rRNA	16S rRNA	escherichia coli	escherichia coli	escherichia coli		N1-N2(amino)[3.55]	(3,3)	4	5	7	7	0	0	0	0	0		tWS
5j7l.cif1	intra	283	638	AA.A.1288.	AA.C.1352.	AA.G.1370.	WC	19-XIX	cWW	cW-W	II	A|C-G	IC	S	S	LR	LR	SM	AUAAAGU	AAUCGUG	CACGGUG				16S rRNA	16S rRNA	16S rRNA	escherichia coli	escherichia coli	escherichia coli	O2'(hydroxyl)-O3'[2.90]_O2'(hydroxyl)-O2'(hydroxyl)[2.83]_N3-O2'(hydroxyl)[2.75]		(3,3)	4	5	7	7	0	0	0	0	0
5j7l.cif1	intra	0	641	AA.A.1333.	AA.A.946.	AA.U.1235.	WC	20-XX	cWW	cW-W	II	A|A-U	JC	S	S	LC	LC	SM	UGAAGUC	UGGAGCA	UGCUACA				16S rRNA	16S rRNA	16S rRNA	escherichia coli	escherichia coli	escherichia coli	O2'(hydroxyl)-O3'[3.11]_O2'(hydroxyl)-O2'(hydroxyl)[2.88]_N3-O2'(hydroxyl)[2.72]		(1,1)	3	10	8	8	0	0	0	0	0	cSS
5j7l.cif1	intra	0	642	AA.A.1398.	AA.G.922.	AA.C.1395.	WC	19-XIX	cWW	cW-W	I	A|G-C	JI	S	S	LC	LC	SM	CACACCG	AUUGACG	GUACACA				16S rRNA	16S rRNA	16S rRNA	escherichia coli	escherichia coli	escherichia coli	N1-O2'(hydroxyl)[2.82]_N3-N2(amino)[3.08]	O2'(hydroxyl)-O2'(hydroxyl)[3.00]_O2'(hydroxyl)-O2(carbonyl)[3.22]	(1,1)	3	7	2	2	0	0	0	0	0	tSS
5j7l.cif1	inter	284	643	AA.A.1418.	DA.G.1948.	DA.C.1958.	WC	19-XIX	cWW	cW-W	I	A|G-C	IC	S	S	LR	LR	SM	GGGAGUG	GUCGGGU	UUCCGAC				16S rRNA	23S rRNA	23S rRNA	escherichia coli	escherichia coli	escherichia coli	N1-O2'(hydroxyl)[2.74]_N3-N2(amino)[3.24]	O2'(hydroxyl)-O2'(hydroxyl)[3.31]	(2,2)	4	2	5	5	1	0	0	0	1	tWS
5j7l.cif1	intra	285	644	AA.A.1433.	AA.G.318.	AA.C.335.	WC	19-XIX	cWW	cW-W	II	A|G-C	IC	S	S	LR	LR	SM	AAGAAGU	ACUGGAA	GUCCAGA				16S rRNA	16S rRNA	16S rRNA	escherichia coli	escherichia coli	escherichia coli		O2'(hydroxyl)-O3'[3.05]_O2'(hydroxyl)-O2'(hydroxyl)[2.71]_N3-O2'(hydroxyl)[2.75]	(2,2)	3	4	5	5	0	0	0	0	0
5j7l.cif1	intra	285	644	AA.A.1434.	AA.G.319.	AA.C.334.	WC	19-XIX	cWW	cW-W	I	A|G-C	IC	S	S	LR	LR	SM	AGAAGUA	CUGGAAC	GGUCCAG				16S rRNA	16S rRNA	16S rRNA	escherichia coli	escherichia coli	escherichia coli		O2'(hydroxyl)-O2'(hydroxyl)[2.73]_O2'(hydroxyl)-O2(carbonyl)[3.24]	(2,2)	3	4	5	5	0	1	0	0	1
5j7l.cif1	intra	0	645	AA.A.1441.	AA.G.1439.	AA.C.1462.	WC	19-XIX	cWW	cW-W	X	A|G-C	BC	S	S	LC	LC	SM	GGUAGCU	UAGGUAG	GCGCUUA				16S rRNA	16S rRNA	16S rRNA	escherichia coli	escherichia coli	escherichia coli		N6(amino)-O2'(hydroxyl)[3.14]	(1,1)	3	1	6	6	0	0	0	0	0
5j7l.cif1	intra	269	607	AA.A.1446.	AA.G.148.	AA.A.174.	IM	08-VIII	cWW	cW-W	X	A|G-A	IC	IC	IC	LR	LR	SM	CUUAACC	GGGGAUA	AAUACCG				16S rRNA	16S rRNA	16S rRNA	escherichia coli	escherichia coli	escherichia coli	O2'(hydroxyl)-O2'(hydroxyl)[2.67]_N1-N2(amino)[3.47]_N3-O2'(hydroxyl)[2.77]		(5,4)	7	2	5	6	0	0	1	0	1	cWS
5j7l.cif1	intra	269	607	AA.A.1447.	AA.G.147.	AA.C.175.	WC	19-XIX	cWW	cW-W	I	A|G-C	IC	S	S	LR	LR	SM	UUAACCU	GGGGGAU	AUACCGC				16S rRNA	16S rRNA	16S rRNA	escherichia coli	escherichia coli	escherichia coli	N3-N2(amino)[3.37]	N1-O2'(hydroxyl)[2.77]	(5,4)	7	2	2	2	0	0	1	0	1	cSS	tWS
5j7l.cif1	inter	284	643	AA.A.1483.	DA.C.1947.	DA.G.1959.	WC	19-XIX	cWW	cW-W	I	A|C-G	IC	S	S	LR	LR	SM	AUGACUG	UGUCGGG	UCCGACM				16S rRNA	23S rRNA	23S rRNA	escherichia coli	escherichia coli	escherichia coli	O2'(hydroxyl)-O2'(hydroxyl)[2.70]_O2'(hydroxyl)-O2(carbonyl)[3.21]	N1-O2'(hydroxyl)[2.81]_N3-N2(amino)[2.96]	(2,2)	4	2	5	5	0	0	1	0	1		tSS
5j7l.cif1	intra	0	646	AA.A.1502.	AA.C.924.	AA.G.1392.	WC	19-XIX	cWW	cW-W	I	A|C-G	JI	S	S	LR	LR	SM	AACAAGG	UGACGGG	CUUGUAC				16S rRNA	16S rRNA	16S rRNA	escherichia coli	escherichia coli	escherichia coli	N1-O2'(hydroxyl)[2.71]	O5'-O2'(hydroxyl)[3.17]_N3-N2(amino)[3.29]	(1,1)	3	9	3	3	0	1	0	0	1		cSS
5j7l.cif1	intra	286	647	AA.MA6.1518.	AA.C.1404.	AA.G.1497.	WC	19-XIX	cWW	cW-W	I	a|C-G	HC	S	S	LR	LR	SM	GMGMMCC	GMCCGUM	GUCGMAA				16S rRNA	16S rRNA	16S rRNA	escherichia coli	escherichia coli	escherichia coli		N1-O2'(hydroxyl)[2.80]	(2,1)	3	4	2	2	0	0	0	0	0
5j7l.cif1	intra	286	647	AA.MA6.1519.	AA.C.1404.	AA.G.1497.	WC	19-XIX	cWW	cW-W	I	a|C-G	HC	S	S	LR	LR	SM	MGMMCCU	GMCCGUM	GUCGMAA				16S rRNA	16S rRNA	16S rRNA	escherichia coli	escherichia coli	escherichia coli	O2'(hydroxyl)-O2'(hydroxyl)[2.81]_O2'(hydroxyl)-O2(carbonyl)[2.68]_O3'-O2'(hydroxyl)[3.30]	N3-N2(amino)[2.86]	(2,1)	3	4	2	2	0	0	0	0	0		tSS
5j7l.cif1	intra	287	648	DB.A.53.	DB.C.31.	DB.G.51.	WC	19-XIX	cWW	cW-W	X	A|C-G	BC	S	S	LC	LC	SM	AGAAGUG	CACCUGA	UCAGAAG				5S rRNA	5S rRNA	5S rRNA	escherichia coli	escherichia coli	escherichia coli	N6(amino)-O2(carbonyl)[2.74]_N1-O2'(hydroxyl)[2.74]		(4,4)	6	2	4	4	0	0	0	0	0	cWS
5j7l.cif1	intra	287	648	DB.A.57.	DB.A.29.	DB.U.55.	WC	20-XX	cWW	cW-W	X	A|A-U	IC	S	S	LC	LC	SM	GUGAAAC	CCCACCU	AAGUGAA				5S rRNA	5S rRNA	5S rRNA	escherichia coli	escherichia coli	escherichia coli		N7-O2'(hydroxyl)[2.81]_N6(amino)-O2(carbonyl)[2.80]	(4,4)	6	3	3	3	1	0	0	0	1		cHS
5j7l.cif1	intra	287	648	DB.A.57.	DB.C.30.	DB.G.54.	WC	19-XIX	cWW	cW-W	X	A|C-G	IC	S	S	LC	LC	SM	GUGAAAC	CCACCUG	GAAGUGA				5S rRNA	5S rRNA	5S rRNA	escherichia coli	escherichia coli	escherichia coli	N6(amino)-O2(carbonyl)[2.94]_N1-O2'(hydroxyl)[2.81]		(4,4)	6	3	3	3	1	0	0	0	1	cWS
5j7l.cif1	intra	287	648	DB.A.58.	DB.A.29.	DB.U.55.	WC	20-XX	cWW	cW-W	X	A|A-U	IC	S	S	LC	LC	SM	UGAAACG	CCCACCU	AAGUGAA				5S rRNA	5S rRNA	5S rRNA	escherichia coli	escherichia coli	escherichia coli	N6(amino)-N3[3.21]_N1-O2'(hydroxyl)[2.86]		(4,4)	6	3	3	3	1	0	0	0	1	cWS
5j7l.cif1	intra	287	648	DB.A.59.	DB.C.28.	DB.G.56.	WC	19-XIX	cWW	cW-W	X	A|C-G	IC	S	S	LC	LC	SM	GAAACGC	UCCCACC	AGUGAAA				5S rRNA	5S rRNA	5S rRNA	escherichia coli	escherichia coli	escherichia coli		N6(amino)-O2'(hydroxyl)[3.14]_N1-N2(amino)[3.04]	(4,4)	6	3	3	3	1	0	0	0	1		tWS
5j7l.cif1	intra	288	649	DA.A.14.	DA.C.2044.	DA.G.2624.	WC	19-XIX	cWW	cW-W	X	A|C-G	JI	S	S	LR	LR	SM	CUAAGCG	UACCCGC	GUGGGCG	abAcdeDfgFEChBHiGI	1,2,3,4,5,6,7,8,-7,-6,-5,-4,-3,-2,-1,9,10,11,12,13,14,-13,15,16,17,18,19,20,21,22,-21,-20,-19,-18,-17,-16,-15,-14,-12,-11,-10,-9,23,24,25,26,27,28,29,30,-8,-30,-29,-28,-27,-26,-25,-24,-23,31,32,33,34,35,36,-22,-36,-35,-34,-33,-32,-31	23	23S rRNA	23S rRNA	23S rRNA	escherichia coli	escherichia coli	escherichia coli	N1-O2'(hydroxyl)[2.76]		(2,2)	4	6	8	8	0	0	0	0	0
5j7l.cif1	intra	0	650	DA.A.52.	DA.C.47.	DA.G.178.	WC	19-XIX	cWW	cW-W	I	A|C-G	JC	S	S	LC	LC	SM	AUGAAGG	AGGCGAU	GAGGCGA				23S rRNA	23S rRNA	23S rRNA	escherichia coli	escherichia coli	escherichia coli	O2'(hydroxyl)-O2'(hydroxyl)[2.89]	N1-O2'(hydroxyl)[2.77]_N3-N2(amino)[2.96]	(1,1)	3	6	2	2	0	0	0	0	0		tSS
5j7l.cif1	intra	289	651	DA.A.71.	DA.C.57.	DA.G.70.	WC	19-XIX	cWW	cW-W	X	A|C-G	HP	S	S	LC	LC	SM	GCGAUAA	GGACGUG	UGCGAUA	abAcBC	1,2,-1,3,4,-2,-4,-3	1	23S rRNA	23S rRNA	23S rRNA	escherichia coli	escherichia coli	escherichia coli		N1-N2(amino)[3.05]	(2,2)	3	5	3	3	1	0	0	0	1		cWS
5j7l.cif1	intra	289	651	DA.A.73.	DA.G.58.	DA.C.69.	WC	19-XIX	cWW	cW-W	I	A|G-C	HP	S	S	LC	LC	SM	GAUAAGC	GACGUGC	CUGCGAU	abAcBC	1,2,-1,3,4,-2,-4,-3	1	23S rRNA	23S rRNA	23S rRNA	escherichia coli	escherichia coli	escherichia coli	N1-O2'(hydroxyl)[2.66]_N3-N2(amino)[3.13]	O2'(hydroxyl)-O2'(hydroxyl)[2.69]_O2'(hydroxyl)-O2(carbonyl)[2.68]	(2,2)	3	5	3	3	0	0	0	0	0	tSS		Multi Loop	Stem
5j7l.cif1	intra	0	652	DA.A.103.	DA.G.85.	DA.C.97.	WC	19-XIX	cWW	cW-W	I	A|G-C	IC	S	S	LC	LC	SM	UAUAACC	UAAGGUG	AACCGUU	abAcBC	1,2,-1,3,4,-2,-4,-3	4	23S rRNA	23S rRNA	23S rRNA	escherichia coli	escherichia coli	escherichia coli	N1-O2'(hydroxyl)[2.84]_N3-N2(amino)[2.85]	O2'(hydroxyl)-O2'(hydroxyl)[2.97]	(1,1)	3	7	3	3	0	0	1	0	1	tSS
5j7l.cif1	intra	290	653	DA.A.126.	DA.G.54.	DA.C.116.	WC	19-XIX	cWW	cW-W	II	A|G-C	HC	S	S	LR	LR	SM	GGAAACC	GAAGGAC	UUCCGAA				23S rRNA	23S rRNA	23S rRNA	escherichia coli	escherichia coli	escherichia coli	N1-N2(amino)[3.08]	O2'(hydroxyl)-O3'[3.38]_O2'(hydroxyl)-O2'(hydroxyl)[2.76]_N3-O2'(hydroxyl)[2.72]	(2,2)	3	4	3	3	1	0	0	0	1	tW.
5j7l.cif1	intra	290	653	DA.A.127.	DA.G.55.	DA.C.115.	WC	19-XIX	cWW	cW-W	I	A|G-C	HC	S	S	LR	LR	SM	GAAACCC	AAGGACG	UUUCCGA				23S rRNA	23S rRNA	23S rRNA	escherichia coli	escherichia coli	escherichia coli	N1-O2'(hydroxyl)[2.72]_N3-N2(amino)[2.88]	O2'(hydroxyl)-O2'(hydroxyl)[2.72]	(2,2)	3	4	3	3	1	0	0	0	1	tSS		Hairpin	Stem
5j7l.cif1	intra	291	654	DA.A.160.	DA.C.2208.	DA.G.2216.	WC	19-XIX	cWW	cW-W	II	A|C-G	HC	S	S	LR	LR	SM	CUGAAUC	ACCCGUA	UCCGGGU				23S rRNA	23S rRNA	23S rRNA	escherichia coli	escherichia coli	escherichia coli	O2'(hydroxyl)-O3'[3.34]_O2'(hydroxyl)-O2'(hydroxyl)[2.81]_N3-O2'(hydroxyl)[2.69]		(2,2)	3	9	6	6	0	0	0	0	0	cSS
[truncated: 1,340 more rows]

## Sheet: CaRNAval
PDB	CHAIN	DSSR_A	DSSR_L	DSSR_R	CaRNAvalSSE1	CaRNAvalSSE2
[truncated: 194 more rows]

[truncated: 1 more sheets: Intersection]
