# Supplementary material
Source: HighWire-hosted journal article supplement (doi:10.1101/rna.078535.120)
Supplement: Supplemental_Table_S3.xlsx [file Supplemental_Table_S3.xlsx]

## Sheet: ReadMe
Description of columns from the “Aclusters_edgesNR_3.0” sheet
Column	Description
PDB	Filename containing the PDB entry identifier
Cluster	Number of the corresponding A-minor cluster
Aminor1	Identifier of the 1st A-minor in the form of “A|L-R”, where A, L, and R are in the DSSR format;
Aminor2	Identifier of the 2nd A-minor in the form of “A|L-R”, where A, L, and R are in the DSSR format;
Edge	Edge description in the form of NidNj relationships divided by underscores, where Nk is A, L, or R of the corresponding A-minor vk and d ϵ {“e” - equality, “n” - consecution, “s” - stacking, “ns” - stacking and consecution}. For example, the description “AsA_LeL_ReR” depicts an edge between two A-minors made of the same base pair and non-consecutive stacked adenines;
SS1	Class of the 1st A-minor according to the proposed classification
SS2	Class of the 2nd A-minor according to the proposed classification
RelAA	Relative relation between the “A” nucleotide of the 1st A-minor and the “A” nucleotide of the 2nd A-minor (SM for the same element; LC for adjacent elements; LR for distant elements)
RelAL	Relative relation between the “A” nucleotide of the 1st A-minor and the “L” nucleotide of the 2nd A-minor (SM for the same element; LC for adjacent elements; LR for distant elements)
RelAR	Relative relation between the “A” nucleotide of the 1st A-minor and the “R” nucleotide of the 2nd A-minor (SM for the same element; LC for adjacent elements; LR for distant elements)
RelLA	Relative relation between the “L” nucleotide of the 1st A-minor and the “A” nucleotide of the 2nd A-minor (SM for the same element; LC for adjacent elements; LR for distant elements)
RelLL	Relative relation between the “L” nucleotide of the 1st A-minor and the “L” nucleotide of the 2nd A-minor (SM for the same element; LC for adjacent elements; LR for distant elements)
RelLR	Relative relation between the “L” nucleotide of the 1st A-minor and the “R” nucleotide of the 2nd A-minor (SM for the same element; LC for adjacent elements; LR for distant elements)
RelRA	Relative relation between the “R” nucleotide of the 1st A-minor and the “A” nucleotide of the 2nd A-minor (SM for the same element; LC for adjacent elements; LR for distant elements)
RelRL	Relative relation between the “R” nucleotide of the 1st A-minor and the “L” nucleotide of the 2nd A-minor (SM for the same element; LC for adjacent elements; LR for distant elements)
RelRR	Relative relation between the “R” nucleotide of the 1st A-minor and the “R” nucleotide of the 2nd A-minor (SM for the same element; LC for adjacent elements; LR for distant elements)
MOTIFSIZE	Size of the corresponding A-minor cluster (#Adenines, #Base pairs)
FRAGMENTS	Number of threads and wings involved in the corresponding A-minor cluster
StackAA	Description of the stacking interaction between the “A” nucleotide of the 1st A-minor and the “A” nucleotide of the 2nd A-minor according to the DSSR program
StackAL	Description of the stacking interaction between the “A” nucleotide of the 1st A-minor and the “L” nucleotide of the 2nd A-minor according to the DSSR program
StackAR	Description of the stacking interaction between the “A” nucleotide of the 1st A-minor and the “R” nucleotide of the 2nd A-minor according to the DSSR program
StackLA	Description of the stacking interaction between the “L” nucleotide of the 1st A-minor and the “A” nucleotide of the 2nd A-minor according to the DSSR program
StackLL	Description of the stacking interaction between the “L” nucleotide of the 1st A-minor and the “L” nucleotide of the 2nd A-minor according to the DSSR program
StackLR	Description of the stacking interaction between the “L” nucleotide of the 1st A-minor and the “R” nucleotide of the 2nd A-minor according to the DSSR program
StackRA	Description of the stacking interaction between the “R” nucleotide of the 1st A-minor and the “A” nucleotide of the 2nd A-minor according to the DSSR program
StackRL	Description of the stacking interaction between the “R” nucleotide of the 1st A-minor and the “L” nucleotide of the 2nd A-minor according to the DSSR program
StackRR	Description of the stacking interaction between the “R” nucleotide of the 1st A-minor and the “R” nucleotide of the 2nd A-minor according to the DSSR program

## Sheet: Aclusters_edgesNR_3.0
PDB	Cluster	Aminor1	Aminor2	Edge	SS1	SS2	RelAA	RelAL	RelAR	RelLA	RelLL	RelLR	RelRA	RelRL	RelRR	MOTIFSIZE	FRAGMENTS	StackAA	StackAL	StackAR	StackLA	StackLL	StackLR	StackRA	StackRL	StackRR
1f1t.cif1	1	A.A.26.|A.5BU.11.-A.A.22.	A.A.27.|A.C.10.-A.G.23.	AnsA_LnL_RnsR	IC-S-S-LC-LC-SM	IC-S-S-LC-LC-SM	SM	LC	LC	LC	SM	SM	LC	SM	SM	(2,2)	3	4.4(3.4)--pm(>>,forward)								4.3(3.6)--pm(>>,forward)
1hc8.cif1	2	C.A.134.|C.A.104.-C.U.155.	C.A.135.|C.G.105.-C.C.154.	AnsA_LnsL_RnR	JC-S-S-LC-LC-SM	JC-S-S-LC-LC-SM	SM	LC	LC	LC	SM	SM	LC	SM	SM	(2,2)	3	6.4(4.6)--pm(>>,forward)				3.5(2.9)--pm(>>,forward)
1hmh.cif1	3	A.A.23.L|C.C.104.-C.G.114.	A.A.24.L|C.C.103.-C.G.113.	AnsA_LnsL_RnsR	HC-S-S-LR-LR-SM	HC-S-S-LR-LR-SM	SM	LR	LR	LR	SM	SM	LR	SM	SM	(2,2)	3	6.8(5.0)--pm(>>,forward)				1.2(0.4)--pm(<<,backward)				2.8(1.2)--pm(>>,forward)
1kh6.cif1	4	A.A.6.|A.A.24.-A.5BU.37.	A.A.6.|A.A.25.-A.5BU.36.	AeA_LnsL_RnsR	JC-S-S-LC-LC-SM	JC-S-S-LC-LC-SM	SM	LC	LC	LC	SM	SM	LC	SM	SM	(2,2)	3					1.6(1.5)--pm(>>,forward)				4.4(0.4)--pm(<<,backward)
1kh6.cif1	4	A.A.6.|A.A.24.-A.5BU.37.	A.A.7.|A.A.24.-A.5BU.37.	AnA_LeL_ReR	JC-S-S-LC-LC-SM	JC-S-S-LC-LC-SM	SM	LC	LC	LC	SM	SM	LC	SM	SM	(2,2)	3
1kh6.cif1	4	A.A.6.|A.A.25.-A.5BU.36.	A.A.7.|A.A.24.-A.5BU.37.	AnA_LnsL_RnsR	JC-S-S-LC-LC-SM	JC-S-S-LC-LC-SM	SM	LC	LC	LC	SM	SM	LC	SM	SM	(2,2)	3					1.6(1.5)--pm(<<,backward)				4.4(0.4)--pm(>>,forward)
1l2x.cif1	5	A.A.23.|A.G.6.-A.C.15.	A.A.24.|A.G.7.-A.C.14.	AnsA_LnsL_RnR	HP-S-S-LC-LC-SM	HP-S-S-LC-LC-SM	SM	LC	LC	LC	SM	SM	LC	SM	SM	(3,2)	3	5.4(3.8)--pm(>>,forward)				3.9(2.5)--pm(>>,forward)
1l2x.cif1	5	A.A.23.|A.G.6.-A.C.15.	A.A.25.|A.G.7.-A.C.14.	LnsL_RnR	HP-S-S-LC-LC-SM	HP-S-S-LC-LC-SM	SM	LC	LC	LC	SM	SM	LC	SM	SM	(3,2)	3					3.9(2.5)--pm(>>,forward)
1l2x.cif1	5	A.A.24.|A.G.7.-A.C.14.	A.A.25.|A.G.7.-A.C.14.	AnA_LeL_ReR	HP-S-S-LC-LC-SM	HP-S-S-LC-LC-SM	SM	LC	LC	LC	SM	SM	LC	SM	SM	(3,2)	3
1mms.cif1	6	C.A.1084.|C.G.1054.-C.C.1105.	C.A.1085.|C.G.1055.-C.C.1104.	AnsA_LnsL_RnsR	JC-S-S-LC-LC-SM	JC-S-S-LC-LC-SM	SM	LC	LC	LC	SM	SM	LC	SM	SM	(2,2)	3	6.6(4.8)--pm(>>,forward)				4.0(2.5)--pm(>>,forward)				1.1(0.2)--pm(<<,backward)
1n32.cif1	7	A.A.1492.|Y.A.35.-Z.U.2.	A.A.1493.|Y.G.36.-Z.U.1.	AnsA_LnsL_RnR_RsL	IC-S-S-LR-LR-SM	IC-S-S-LR-LR-SM	SM	LR	LR	LR	SM	SM	LR	SM	SM	(2,2)	3	5.9(3.7)--pm(>>,forward)				2.0(1.3)--pm(>>,forward)			1.9(0.1)--mm(<>,outward)
1u9s.cif1	8	A.A.184.|A.C.135.-A.G.163.	A.A.184.|A.C.136.-A.G.162.	AeA_LnL_RnsR	HC-S-S-LR-LR-SM	HC-S-S-LR-LR-SM	SM	LR	LR	LR	SM	SM	LR	SM	SM	(2,2)	3									3.1(1.6)--pm(<<,backward)
1u9s.cif1	8	A.A.184.|A.C.135.-A.G.163.	A.A.185.|A.C.135.-A.G.163.	AnsA_LeL_ReR	HC-S-S-LR-LR-SM	HC-S-S-LR-LR-SM	SM	LR	LR	LR	SM	SM	LR	SM	SM	(2,2)	3	5.4(3.9)--pm(>>,forward)
1u9s.cif1	8	A.A.184.|A.C.136.-A.G.162.	A.A.185.|A.C.135.-A.G.163.	AnsA_LnL_RnsR	HC-S-S-LR-LR-SM	HC-S-S-LR-LR-SM	SM	LR	LR	LR	SM	SM	LR	SM	SM	(2,2)	3	5.4(3.9)--pm(>>,forward)								3.1(1.6)--pm(>>,forward)
1u9s.cif1	9	A.A.207.|A.C.81.-A.G.93.	A.A.208.|A.C.80.-A.G.94.	AnsA_LnL_RnsR	HC-S-S-LR-LR-SM	HC-S-S-LR-LR-SM	SM	LR	LR	LR	SM	SM	LR	SM	SM	(2,2)	3	5.3(3.2)--pm(>>,forward)								2.4(0.9)--pm(>>,forward)
1u9s.cif1	10	A.A.220.|A.C.196.-A.G.217.	A.A.220.|A.C.197.-A.G.216.	AeA_LnL_RnsR	JC-S-S-LC-LC-SM	JC-S-S-LC-LC-SM	SM	LC	LC	LC	SM	SM	LC	SM	SM	(1,2)	3									3.8(2.2)--pm(<<,backward)
1xmq.cif1	11	A.A.1492.|W.A.2.-X.U.35.	A.A.1493.|W.A.1.-X.U.36.	AnsA_LnsL_RnsR	IC-S-S-LR-LR-SM	IC-S-S-LR-LR-SM	SM	LR	LR	LR	SM	SM	LR	SM	SM	(2,2)	3	4.7(2.1)--pm(>>,forward)				0.4(0.4)--pm(<<,backward)				1.3(0.5)--pm(>>,forward)
1y26.cif1	12	X.A.33.|X.G.37.-X.C.61.	X.A.65.|X.G.37.-X.C.61.	LeL_ReR	HP-S-S-LC-LC-SM	HP-S-S-LC-LC-SM	LR	LC	LC	LC	SM	SM	LC	SM	SM	(3,2)	4
1y26.cif1	12	X.A.33.|X.G.37.-X.C.61.	X.A.66.|X.G.38.-X.C.60.	LnsL_RnsR	HP-S-S-LC-LC-SM	HP-S-S-LC-LC-SM	LR	LC	LC	LC	SM	SM	LC	SM	SM	(3,2)	4					7.6(5.1)--pm(>>,forward)				1.7(0.1)--pm(<<,backward)
1y26.cif1	12	X.A.65.|X.G.37.-X.C.61.	X.A.66.|X.G.38.-X.C.60.	AnsA_LnsL_RnsR	HP-S-S-LC-LC-SM	HP-S-S-LC-LC-SM	SM	LC	LC	LC	SM	SM	LC	SM	SM	(3,2)	4	6.5(4.7)--pm(>>,forward)				7.6(5.1)--pm(>>,forward)				1.7(0.1)--pm(<<,backward)
1y27.cif1	13	X.A.33.|X.G.37.-X.C.61.	X.A.65.|X.G.37.-X.C.61.	LeL_ReR	HP-S-S-LC-LC-SM	HP-S-S-LC-LC-SM	LR	LC	LC	LC	SM	SM	LC	SM	SM	(3,2)	4
1y27.cif1	13	X.A.33.|X.G.37.-X.C.61.	X.A.66.|X.G.38.-X.C.60.	LnsL_RnsR	HP-S-S-LC-LC-SM	HP-S-S-LC-LC-SM	LR	LC	LC	LC	SM	SM	LC	SM	SM	(3,2)	4					7.2(5.1)--pm(>>,forward)				2.4(0.5)--pm(<<,backward)
1y27.cif1	13	X.A.65.|X.G.37.-X.C.61.	X.A.66.|X.G.38.-X.C.60.	AnsA_LnsL_RnsR	HP-S-S-LC-LC-SM	HP-S-S-LC-LC-SM	SM	LC	LC	LC	SM	SM	LC	SM	SM	(3,2)	4	6.5(4.6)--pm(>>,forward)				7.2(5.1)--pm(>>,forward)				2.4(0.5)--pm(<<,backward)
2a43.cif1	14	A.A.23.|A.G.5.-A.C.14.	A.A.24.|A.G.6.-A.C.13.	AnsA_LnsL_RnR	HP-S-S-LC-LC-SM	HP-S-S-LC-LC-SM	SM	LC	LC	LC	SM	SM	LC	SM	SM	(3,2)	3	5.6(3.9)--pm(>>,forward)				3.8(2.3)--pm(>>,forward)
2a43.cif1	14	A.A.23.|A.G.5.-A.C.14.	A.A.25.|A.G.6.-A.C.13.	LnsL_RnR	HP-S-S-LC-LC-SM	HP-S-S-LC-LC-SM	SM	LC	LC	LC	SM	SM	LC	SM	SM	(3,2)	3					3.8(2.3)--pm(>>,forward)
2a43.cif1	14	A.A.24.|A.G.6.-A.C.13.	A.A.25.|A.G.6.-A.C.13.	AnA_LeL_ReR	HP-S-S-LC-LC-SM	HP-S-S-LC-LC-SM	SM	LC	LC	LC	SM	SM	LC	SM	SM	(3,2)	3
2bte.cif1	15	B.A.47.B|E.G.7.-E.C.66.	B.A.47.C|E.G.49.-E.C.65.	AnsA_LsL_RnR	HC-S-S-LR-LR-SM	HC-S-S-LR-LR-SM	SM	LR	LR	LR	LR	LR	LR	LR	LR	(2,2)	5	6.2(4.2)--pm(>>,forward)				3.3(1.7)--pm(>>,forward)
2bte.cif1	16	E.A.47.B|B.G.7.-B.C.66.	E.A.47.C|B.G.49.-B.C.65.	AnsA_LsL_RnR	HC-S-S-LR-LR-SM	HC-S-S-LR-LR-SM	SM	LR	LR	LR	LR	LR	LR	LR	LR	(2,2)	5	5.8(3.7)--pm(>>,forward)				3.8(2.1)--pm(>>,forward)
2gdi.cif1	17	X.A.41.|X.G.18.-X.C.48.	X.A.56.|X.G.17.-X.C.49.	LnsL_RnsR	ICIP-S-S-LC-LC-SM	IPJC-S-S-LC-LC-SM	SM	LC	LC	LC	SM	SM	LC	SM	SM	(3,3)	5					3.8(2.4)--pm(<<,backward)				3.1(1.1)--pm(>>,forward)
2gdi.cif1	18	X.A.43.|X.G.21.-X.C.38.	X.A.69.|X.C.22.-X.G.37.	LnsL_RnsR	ICIP-S-S-LC-LC-SM	HC-S-S-LR-LR-SM	LR	LC	LC	LR	SM	SM	LR	SM	SM	(3,2)	4					7.2(4.5)--pm(>>,forward)				4.5(2.0)--pm(<<,backward)
2gdi.cif1	18	X.A.43.|X.G.21.-X.C.38.	X.A.70.|X.C.22.-X.G.37.	LnsL_RnsR	ICIP-S-S-LC-LC-SM	HC-S-S-LR-LR-SM	LR	LC	LC	LR	SM	SM	LR	SM	SM	(3,2)	4					7.2(4.5)--pm(>>,forward)				4.5(2.0)--pm(<<,backward)
2gdi.cif1	17	X.A.56.|X.G.17.-X.C.49.	X.A.84.|X.G.16.-X.C.50.	AsA_LnsL_RnsR	IPJC-S-S-LC-LC-SM	IPJC-S-S-LC-LC-SM	SM	LC	LC	LC	SM	SM	LC	SM	SM	(3,3)	5	2.6(1.0)--mm(<>,outward)				2.6(1.1)--pm(<<,backward)				2.3(0.9)--pm(>>,forward)
2gdi.cif1	18	X.A.69.|X.C.22.-X.G.37.	X.A.70.|X.C.22.-X.G.37.	AnsA_LeL_ReR	HC-S-S-LR-LR-SM	HC-S-S-LR-LR-SM	SM	LR	LR	LR	SM	SM	LR	SM	SM	(3,2)	4	5.6(4.0)--pm(>>,forward)
2oiu.cif1	19	P.A.62.|Q.C.5.-Q.G.47.	P.A.63.|Q.C.4.-Q.G.48.	AnsA_LnL_RnsR	HC-S-S-LR-LR-SM	HC-S-S-LR-LR-SM	SM	LR	LR	LR	SM	SM	LR	SM	SM	(2,2)	3	6.2(4.1)--pm(>>,forward)								4.1(2.0)--pm(>>,forward)
2oiu.cif1	20	Q.A.61.|P.C.5.-P.G.47.	Q.A.62.|P.C.4.-P.G.48.	AnsA_LnsL_RnsR	HC-S-S-LR-LR-SM	HC-S-S-LR-LR-SM	SM	LR	LR	LR	SM	SM	LR	SM	SM	(3,2)	3	5.7(4.2)--pm(>>,forward)				0.5(0.1)--pm(<<,backward)				2.7(1.1)--pm(>>,forward)
2oiu.cif1	20	Q.A.61.|P.C.5.-P.G.47.	Q.A.62.|P.C.5.-P.G.47.	AnsA_LeL_ReR	HC-S-S-LR-LR-SM	HC-S-S-LR-LR-SM	SM	LR	LR	LR	SM	SM	LR	SM	SM	(3,2)	3	5.7(4.2)--pm(>>,forward)
2oiu.cif1	20	Q.A.61.|P.C.5.-P.G.47.	Q.A.63.|P.C.4.-P.G.48.	LnsL_RnsR	HC-S-S-LR-LR-SM	HC-S-S-LR-LR-SM	SM	LR	LR	LR	SM	SM	LR	SM	SM	(3,2)	3					0.5(0.1)--pm(<<,backward)				2.7(1.1)--pm(>>,forward)
2oiu.cif1	20	Q.A.62.|P.C.4.-P.G.48.	Q.A.62.|P.C.5.-P.G.47.	AeA_LnsL_RnsR	HC-S-S-LR-LR-SM	HC-S-S-LR-LR-SM	SM	LR	LR	LR	SM	SM	LR	SM	SM	(3,2)	3					0.5(0.1)--pm(>>,forward)				2.7(1.1)--pm(<<,backward)
2oiu.cif1	20	Q.A.62.|P.C.4.-P.G.48.	Q.A.63.|P.C.4.-P.G.48.	AnsA_LeL_ReR	HC-S-S-LR-LR-SM	HC-S-S-LR-LR-SM	SM	LR	LR	LR	SM	SM	LR	SM	SM	(3,2)	3	6.6(4.9)--pm(>>,forward)
2oiu.cif1	20	Q.A.62.|P.C.5.-P.G.47.	Q.A.63.|P.C.4.-P.G.48.	AnsA_LnsL_RnsR	HC-S-S-LR-LR-SM	HC-S-S-LR-LR-SM	SM	LR	LR	LR	SM	SM	LR	SM	SM	(3,2)	3	6.6(4.9)--pm(>>,forward)				0.5(0.1)--pm(<<,backward)				2.7(1.1)--pm(>>,forward)
2qwy.cif1	21	C.A.33.|C.G.3.-C.C.29.	C.A.33.|C.C.4.-C.G.28.	AeA_LnsL_RnsR	HP-S-S-LC-LC-SM	HP-S-S-LC-LC-SM	SM	LC	LC	LC	SM	SM	LC	SM	SM	(4,3)	3					6.5(3.4)--pm(>>,forward)				6.4(3.5)--pm(<<,backward)
2qwy.cif1	21	C.A.33.|C.G.3.-C.C.29.	C.A.35.|C.C.4.-C.G.28.	AsA_LnsL_RnsR	HP-S-S-LC-LC-SM	HP-S-S-LC-LC-SM	SM	LC	LC	LC	SM	SM	LC	SM	SM	(4,3)	3	5.3(4.3)--pm(>>,forward)				6.5(3.4)--pm(>>,forward)				6.4(3.5)--pm(<<,backward)
2qwy.cif1	21	C.A.33.|C.G.3.-C.C.29.	C.A.35.|C.G.5.-C.C.27.	AsA	HP-S-S-LC-LC-SM	HP-S-S-LC-LC-SM	SM	LC	LC	LC	SM	SM	LC	SM	SM	(4,3)	3	5.3(4.3)--pm(>>,forward)
2qwy.cif1	21	C.A.33.|C.C.4.-C.G.28.	C.A.35.|C.C.4.-C.G.28.	AsA_LeL_ReR	HP-S-S-LC-LC-SM	HP-S-S-LC-LC-SM	SM	LC	LC	LC	SM	SM	LC	SM	SM	(4,3)	3	5.3(4.3)--pm(>>,forward)
2qwy.cif1	21	C.A.33.|C.C.4.-C.G.28.	C.A.35.|C.G.5.-C.C.27.	AsA_LnsL_RnsR	HP-S-S-LC-LC-SM	HP-S-S-LC-LC-SM	SM	LC	LC	LC	SM	SM	LC	SM	SM	(4,3)	3	5.3(4.3)--pm(>>,forward)				2.1(0.6)--pm(>>,forward)				2.7(1.0)--pm(<<,backward)
2qwy.cif1	21	C.A.33.|C.C.4.-C.G.28.	C.A.36.|C.G.5.-C.C.27.	LnsL_RnsR	HP-S-S-LC-LC-SM	HP-S-S-LC-LC-SM	SM	LC	LC	LC	SM	SM	LC	SM	SM	(4,3)	3					2.1(0.6)--pm(>>,forward)				2.7(1.0)--pm(<<,backward)
2qwy.cif1	21	C.A.33.|C.C.4.-C.G.28.	C.A.37.|C.G.5.-C.C.27.	LnsL_RnsR	HP-S-S-LC-LC-SM	HP-S-S-LC-LC-SM	SM	LC	LC	LC	SM	SM	LC	SM	SM	(4,3)	3					2.1(0.6)--pm(>>,forward)				2.7(1.0)--pm(<<,backward)
2qwy.cif1	21	C.A.35.|C.C.4.-C.G.28.	C.A.35.|C.G.5.-C.C.27.	AeA_LnsL_RnsR	HP-S-S-LC-LC-SM	HP-S-S-LC-LC-SM	SM	LC	LC	LC	SM	SM	LC	SM	SM	(4,3)	3					2.1(0.6)--pm(>>,forward)				2.7(1.0)--pm(<<,backward)
2qwy.cif1	21	C.A.35.|C.C.4.-C.G.28.	C.A.36.|C.G.5.-C.C.27.	AnsA_LnsL_RnsR	HP-S-S-LC-LC-SM	HP-S-S-LC-LC-SM	SM	LC	LC	LC	SM	SM	LC	SM	SM	(4,3)	3	5.6(4.0)--pm(>>,forward)				2.1(0.6)--pm(>>,forward)				2.7(1.0)--pm(<<,backward)
2qwy.cif1	21	C.A.35.|C.C.4.-C.G.28.	C.A.37.|C.G.5.-C.C.27.	LnsL_RnsR	HP-S-S-LC-LC-SM	HP-S-S-LC-LC-SM	SM	LC	LC	LC	SM	SM	LC	SM	SM	(4,3)	3					2.1(0.6)--pm(>>,forward)				2.7(1.0)--pm(<<,backward)
2qwy.cif1	21	C.A.35.|C.G.5.-C.C.27.	C.A.36.|C.G.5.-C.C.27.	AnsA_LeL_ReR	HP-S-S-LC-LC-SM	HP-S-S-LC-LC-SM	SM	LC	LC	LC	SM	SM	LC	SM	SM	(4,3)	3	5.6(4.0)--pm(>>,forward)
2qwy.cif1	21	C.A.35.|C.G.5.-C.C.27.	C.A.37.|C.G.5.-C.C.27.	LeL_ReR	HP-S-S-LC-LC-SM	HP-S-S-LC-LC-SM	SM	LC	LC	LC	SM	SM	LC	SM	SM	(4,3)	3
2qwy.cif1	21	C.A.36.|C.G.5.-C.C.27.	C.A.37.|C.G.5.-C.C.27.	AnsA_LeL_ReR	HP-S-S-LC-LC-SM	HP-S-S-LC-LC-SM	SM	LC	LC	LC	SM	SM	LC	SM	SM	(4,3)	3	5.8(4.0)--pm(>>,forward)
2r8s.cif1	22	R.A.152.|R.C.223.-R.G.250.	R.A.153.|R.C.223.-R.G.250.	AnsA_LeL_ReR	HC-S-S-LR-LR-SM	HC-S-S-LR-LR-SM	SM	LR	LR	LR	SM	SM	LR	SM	SM	(2,1)	3	7.0(5.1)--pm(>>,forward)
2r8s.cif1	23	R.A.183.|R.G.110.-R.C.211.	R.A.184.|R.C.109.-R.G.212.	AnsA_LnL_LsR_RnsR	IC-S-S-LR-LR-SM	IC-S-S-LR-LR-SM	SM	LR	LR	LR	SM	SM	LR	SM	SM	(2,2)	3	5.1(3.0)--pm(>>,forward)					4.7(2.0)--mm(<>,outward)			0.3(0.1)--pm(>>,forward)
2uxc.cif1	24	A.A.1492.|X.G.36.-Y.C.2.	A.A.1493.|X.A.37.-Y.U.1.	AnsA_LnsL_RnR	IC-S-S-LR-LR-SM	IC-S-S-LR-LR-SM	SM	LR	LR	LR	SM	SM	LR	SM	SM	(2,2)	3	6.2(4.0)--pm(>>,forward)				3.4(1.7)--pm(>>,forward)
2xd0.cif1	25	W.A.19.|W.G.2.-W.C.15.	W.A.20.|W.G.3.-W.C.14.	AnsA_LnsL_RnR	HP-S-S-LC-LC-SM	HP-S-S-LC-LC-SM	SM	LC	LC	LC	SM	SM	LC	SM	SM	(2,2)	3	4.3(1.7)--pm(>>,forward)				4.7(3.1)--pm(>>,forward)
2xdb.cif1	26	G.A.19.|G.G.2.-G.C.15.	G.A.20.|G.G.3.-G.C.14.	AnsA_LnsL_RnR	HP-S-S-LC-LC-SM	HP-S-S-LC-LC-SM	SM	LC	LC	LC	SM	SM	LC	SM	SM	(2,2)	3	5.8(3.5)--pm(>>,forward)				4.6(2.0)--pm(>>,forward)
2ygh.cif1	27	A.A.61.|A.G.22.-A.C.30.	A.A.62.|A.G.23.-A.C.29.	AnsA_LnsL_RnR	IP-S-S-LC-LC-SM	IP-S-S-LC-LC-SM	SM	LC	LC	LC	SM	SM	LC	SM	SM	(2,2)	3	6.4(4.3)--pm(>>,forward)				3.1(1.5)--pm(>>,forward)
2z75.cif1	28	B.A.104.|B.C.36.-B.G.53.	B.A.105.|B.C.36.-B.G.53.	AnsA_LeL_ReR	IC-S-S-LR-LR-SM	IC-S-S-LR-LR-SM	SM	LR	LR	LR	SM	SM	LR	SM	SM	(4,3)	4	6.1(4.3)--pm(>>,forward)
2z75.cif1	28	B.A.104.|B.C.36.-B.G.53.	B.A.127.|B.G.37.-B.C.52.	AsA_LnL_RnsR	IC-S-S-LR-LR-SM	IC-S-S-LR-LR-SM	SM	LR	LR	LR	SM	SM	LR	SM	SM	(4,3)	4	5.8(3.7)--mm(<>,outward)								1.9(0.5)--pm(<<,backward)
2z75.cif1	28	B.A.105.|B.C.36.-B.G.53.	B.A.127.|B.G.37.-B.C.52.	LnL_RnsR	IC-S-S-LR-LR-SM	IC-S-S-LR-LR-SM	SM	LR	LR	LR	SM	SM	LR	SM	SM	(4,3)	4									1.9(0.5)--pm(<<,backward)
2z75.cif1	28	B.A.127.|B.G.37.-B.C.52.	B.A.129.|B.A.38.-B.U.51.	LnsL_RnR	IC-S-S-LR-LR-SM	IC-S-S-LR-LR-SM	SM	LR	LR	LR	SM	SM	LR	SM	SM	(4,3)	4					3.1(1.6)--pm(>>,forward)
3d2v.cif1	29	A.A.29.|A.G.10.-A.C.36.	A.A.44.|A.G.9.-A.C.37.	LnsL_RnsR	IC-S-S-LC-LC-SM	JC-S-S-LC-LC-SM	LR	LC	LC	LC	SM	SM	LC	SM	SM	(3,3)	5					3.8(2.3)--pm(<<,backward)				0.6(0.1)--pm(>>,forward)
3d2v.cif1	30	A.A.31.|A.G.13.-A.C.26.	A.A.57.|A.C.14.-A.G.25.	LnsL_RnsR	IC-S-S-LC-LC-SM	HC-S-S-LR-LR-SM	LR	LC	LC	LR	SM	SM	LR	SM	SM	(3,2)	4					7.2(4.2)--pm(>>,forward)				3.2(1.3)--pm(<<,backward)
3d2v.cif1	30	A.A.31.|A.G.13.-A.C.26.	A.A.58.|A.C.14.-A.G.25.	LnsL_RnsR	IC-S-S-LC-LC-SM	HC-S-S-LR-LR-SM	LR	LC	LC	LR	SM	SM	LR	SM	SM	(3,2)	4					7.2(4.2)--pm(>>,forward)				3.2(1.3)--pm(<<,backward)
3d2v.cif1	29	A.A.44.|A.G.9.-A.C.37.	A.A.72.|A.G.8.-A.C.38.	AsA_LnsL_RnsR	JC-S-S-LC-LC-SM	JC-S-S-LC-LC-SM	SM	LC	LC	LC	SM	SM	LC	SM	SM	(3,3)	5	1.7(0.4)--mm(<>,outward)				2.6(1.1)--pm(<<,backward)				0.8(0.2)--pm(>>,forward)
3d2v.cif1	30	A.A.57.|A.C.14.-A.G.25.	A.A.58.|A.C.14.-A.G.25.	AnsA_LeL_ReR	HC-S-S-LR-LR-SM	HC-S-S-LR-LR-SM	SM	LR	LR	LR	SM	SM	LR	SM	SM	(3,2)	4	6.1(4.4)--pm(>>,forward)
3dil.cif1	31	A.A.126.|A.U.24.-A.G.69.	A.A.127.|A.A.23.-A.G.69.	AnsA_LnsL_ReR	HC-IC-HPIC-LR-LR-SM	HC-IC-HPIC-LR-LR-SM	SM	LR	LR	LR	SM	SM	LR	SM	SM	(3,2)	3	6.0(4.3)--pm(>>,forward)				6.4(3.6)--pm(<<,backward)
3dil.cif1	31	A.A.126.|A.U.24.-A.G.69.	A.A.127.|A.U.24.-A.G.69.	AnsA_LeL_ReR	HC-IC-HPIC-LR-LR-SM	HC-IC-HPIC-LR-LR-SM	SM	LR	LR	LR	SM	SM	LR	SM	SM	(3,2)	3	6.0(4.3)--pm(>>,forward)
3dil.cif1	31	A.A.126.|A.U.24.-A.G.69.	A.A.129.|A.U.24.-A.G.69.	LeL_ReR	HC-IC-HPIC-LR-LR-SM	HC-IC-HPIC-LR-LR-SM	SM	LR	LR	LR	SM	SM	LR	SM	SM	(3,2)	3
3dil.cif1	31	A.A.127.|A.A.23.-A.G.69.	A.A.127.|A.U.24.-A.G.69.	AeA_LnsL_ReR	HC-IC-HPIC-LR-LR-SM	HC-IC-HPIC-LR-LR-SM	SM	LR	LR	LR	SM	SM	LR	SM	SM	(3,2)	3					6.4(3.6)--pm(>>,forward)
3dil.cif1	31	A.A.127.|A.A.23.-A.G.69.	A.A.129.|A.U.24.-A.G.69.	AsA_LnsL_ReR	HC-IC-HPIC-LR-LR-SM	HC-IC-HPIC-LR-LR-SM	SM	LR	LR	LR	SM	SM	LR	SM	SM	(3,2)	3	4.5(2.8)--pm(>>,forward)				6.4(3.6)--pm(>>,forward)
3dil.cif1	31	A.A.127.|A.U.24.-A.G.69.	A.A.129.|A.U.24.-A.G.69.	AsA_LeL_ReR	HC-IC-HPIC-LR-LR-SM	HC-IC-HPIC-LR-LR-SM	SM	LR	LR	LR	SM	SM	LR	SM	SM	(3,2)	3	4.5(2.8)--pm(>>,forward)
3e5c.cif1	32	A.A.38.|A.C.6.-A.G.48.	A.A.39.|A.C.6.-A.G.48.	AnsA_LeL_ReR	JC-S-S-LC-LC-SM	JC-S-S-LC-LC-SM	SM	LC	LC	LC	SM	SM	LC	SM	SM	(2,1)	3	6.0(3.2)--pm(>>,forward)
3g9c.cif1	33	Q.A.86.|Q.G.67.-Q.C.83.	Q.A.87.|Q.G.68.-Q.C.82.	AnsA_LnsL_RnR	IP-S-S-LC-LC-SM	IP-S-S-LC-LC-SM	SM	LC	LC	LC	SM	SM	LC	SM	SM	(2,2)	3	5.8(3.4)--pm(>>,forward)				4.0(2.5)--pm(>>,forward)
3g9c.cif1	34	Q.A.98.|Q.C.29.-Q.G.45.	Q.A.99.|Q.C.29.-Q.G.45.	AnsA_LeL_ReR	IC-S-S-LR-LR-SM	IC-S-S-LR-LR-SM	SM	LR	LR	LR	SM	SM	LR	SM	SM	(5,3)	4	6.6(4.8)--pm(>>,forward)
3g9c.cif1	34	Q.A.98.|Q.C.29.-Q.G.45.	Q.A.123.|Q.G.30.-Q.C.44.	AsA_LnL_RnsR	IC-S-S-LR-LR-SM	IC-S-S-LR-LR-SM	SM	LR	LR	LR	SM	SM	LR	SM	SM	(5,3)	4	5.1(2.4)--mm(<>,outward)								1.9(0.6)--pm(<<,backward)
3g9c.cif1	34	Q.A.98.|Q.C.29.-Q.G.45.	Q.A.124.|Q.G.30.-Q.C.44.	LnL_RnsR	IC-S-S-LR-LR-SM	IC-S-S-LR-LR-SM	SM	LR	LR	LR	SM	SM	LR	SM	SM	(5,3)	4									1.9(0.6)--pm(<<,backward)
3g9c.cif1	34	Q.A.99.|Q.C.29.-Q.G.45.	Q.A.123.|Q.G.30.-Q.C.44.	LnL_RnsR	IC-S-S-LR-LR-SM	IC-S-S-LR-LR-SM	SM	LR	LR	LR	SM	SM	LR	SM	SM	(5,3)	4									1.9(0.6)--pm(<<,backward)
3g9c.cif1	34	Q.A.99.|Q.C.29.-Q.G.45.	Q.A.124.|Q.G.30.-Q.C.44.	LnL_RnsR	IC-S-S-LR-LR-SM	IC-S-S-LR-LR-SM	SM	LR	LR	LR	SM	SM	LR	SM	SM	(5,3)	4									1.9(0.6)--pm(<<,backward)
3g9c.cif1	34	Q.A.123.|Q.G.30.-Q.C.44.	Q.A.124.|Q.G.30.-Q.C.44.	AnsA_LeL_ReR	IC-S-S-LR-LR-SM	IC-S-S-LR-LR-SM	SM	LR	LR	LR	SM	SM	LR	SM	SM	(5,3)	4	6.3(4.6)--pm(>>,forward)
3g9c.cif1	34	Q.A.123.|Q.G.30.-Q.C.44.	Q.A.125.|Q.A.31.-Q.U.43.	LnsL_RnR	IC-S-S-LR-LR-SM	IC-S-S-LR-LR-SM	SM	LR	LR	LR	SM	SM	LR	SM	SM	(5,3)	4					2.6(1.1)--pm(>>,forward)
3g9c.cif1	34	Q.A.124.|Q.G.30.-Q.C.44.	Q.A.125.|Q.A.31.-Q.U.43.	AnsA_LnsL_RnR	IC-S-S-LR-LR-SM	IC-S-S-LR-LR-SM	SM	LR	LR	LR	SM	SM	LR	SM	SM	(5,3)	4	3.4(2.7)--pm(>>,forward)				2.6(1.1)--pm(>>,forward)
3hhn.cif1	35	E.A.29.|E.G.72.-E.C.85.	E.A.31.|E.A.73.-E.U.84.	LnsL_RnR	IP-S-S-LR-LR-SM	IP-S-S-LR-LR-SM	SM	LR	LR	LR	SM	SM	LR	SM	SM	(4,4)	6					2.8(1.3)--pm(>>,forward)
3hhn.cif1	35	E.A.29.|E.G.72.-E.C.85.	E.A.71.|E.C.86.-E.G.105.	AsA_LnA_LsR_RnL	IP-S-S-LR-LR-SM	IPJC-S-S-LC-LC-SM	LR	LR	LR	LC	LR	LR	LC	LR	LR	(4,4)	6	4.1(2.5)--mm(<>,outward)					2.4(0.9)--mp(<<,backward)
3hhn.cif1	35	E.A.31.|E.A.73.-E.U.84.	E.A.32.|E.G.74.-E.C.83.	AnsA_LnsL_RnsR	IP-S-S-LR-LR-SM	IP-S-S-LR-LR-SM	SM	LR	LR	LR	SM	SM	LR	SM	SM	(4,4)	6	4.9(3.4)--pm(>>,forward)				1.8(1.8)--pm(>>,forward)				0.7(0.2)--pm(<<,backward)
3ivn.cif1	36	A.A.24.|A.G.28.-A.C.52.	A.A.56.|A.G.28.-A.C.52.	LeL_ReR	HP-S-S-LC-LC-SM	HP-S-S-LC-LC-SM	LR	LC	LC	LC	SM	SM	LC	SM	SM	(3,2)	4
3ivn.cif1	36	A.A.24.|A.G.28.-A.C.52.	A.A.57.|A.G.29.-A.C.51.	LnsL_RnsR	HP-S-S-LC-LC-SM	HP-S-S-LC-LC-SM	LR	LC	LC	LC	SM	SM	LC	SM	SM	(3,2)	4					7.2(5.0)--pm(>>,forward)				1.8(0.1)--pm(<<,backward)
3ivn.cif1	36	A.A.56.|A.G.28.-A.C.52.	A.A.57.|A.G.29.-A.C.51.	AnsA_LnsL_RnsR	HP-S-S-LC-LC-SM	HP-S-S-LC-LC-SM	SM	LC	LC	LC	SM	SM	LC	SM	SM	(3,2)	4	5.8(4.1)--pm(>>,forward)				7.2(5.0)--pm(>>,forward)				1.8(0.1)--pm(<<,backward)
3jcs.cif1	37	2.A.980.|3.G.22.-3.G.209.	2.A.980.|3.C.23.-3.G.208.	AeA_LnsL_RnsR	JC-JC-JC-LR-LR-SM	JC-S-S-LR-LR-SM	SM	LR	LR	LR	LC	LC	LR	LC	LC	(1,2)	5					3.4(1.4)--pm(>>,forward)				6.2(4.1)--pm(<<,backward)
3jcs.cif1	38	3.A.8.|3.C.102.-3.G.132.	3.A.9.|3.C.101.-3.G.133.	AnsA_LnL_RnsR	HC-S-S-LR-LR-SM	HC-S-S-LR-LR-SM	SM	LR	LR	LR	SM	SM	LR	SM	SM	(2,2)	3	7.4(5.2)--pm(>>,forward)								4.1(2.2)--pm(>>,forward)
3jcs.cif1	39	3.A.69.|1.C.1748.-1.G.1768.	3.A.70.|1.C.1747.-1.A.1769.	AnsA_LnL_RnsR	JC-S-S-LR-LR-SM	JC-JP-JP-LR-LR-SM	SM	LR	LR	LR	LC	LC	LR	LC	LC	(2,2)	5	3.1(2.3)--pm(>>,forward)								5.7(3.9)--pm(>>,forward)
3jcs.cif1	40	3.A.199.|1.C.1640.-1.G.1742.	3.A.200.|1.C.1640.-1.G.1742.	AnsA_LeL_ReR	IC-JP-JP-LR-LR-SM	IC-JP-JP-LR-LR-SM	SM	LR	LR	LR	SM	SM	LR	SM	SM	(3,1)	3	5.9(4.2)--pm(>>,forward)
3jcs.cif1	40	3.A.199.|1.C.1640.-1.G.1742.	3.A.201.|1.C.1640.-1.G.1742.	LeL_ReR	IC-JP-JP-LR-LR-SM	IC-JP-JP-LR-LR-SM	SM	LR	LR	LR	SM	SM	LR	SM	SM	(3,1)	3
3jcs.cif1	40	3.A.200.|1.C.1640.-1.G.1742.	3.A.201.|1.C.1640.-1.G.1742.	AnsA_LeL_ReR	IC-JP-JP-LR-LR-SM	IC-JP-JP-LR-LR-SM	SM	LR	LR	LR	SM	SM	LR	SM	SM	(3,1)	3	5.4(3.9)--pm(>>,forward)
3k1v.cif1	41	A.A.23.|A.G.2.-A.C.21.	A.A.25.|A.G.2.-A.C.21.	LeL_ReR	HP-S-S-LC-LC-SM	HP-S-S-LC-LC-SM	SM	LC	LC	LC	SM	SM	LC	SM	SM	(7,5)	4
3k1v.cif1	41	A.A.23.|A.G.2.-A.C.21.	A.A.25.|A.A.3.-A.U.20.	LnsL_RnsR	HP-S-S-LC-LC-SM	HP-S-S-LC-LC-SM	SM	LC	LC	LC	SM	SM	LC	SM	SM	(7,5)	4					4.3(3.0)--pm(>>,forward)				2.0(0.3)--pm(<<,backward)
3k1v.cif1	41	A.A.23.|A.G.2.-A.C.21.	A.A.26.|A.A.3.-A.U.20.	LnsL_RnsR	HP-S-S-LC-LC-SM	HP-S-S-LC-LC-SM	SM	LC	LC	LC	SM	SM	LC	SM	SM	(7,5)	4					4.3(3.0)--pm(>>,forward)				2.0(0.3)--pm(<<,backward)
3k1v.cif1	41	A.A.25.|A.G.2.-A.C.21.	A.A.25.|A.A.3.-A.U.20.	AeA_LnsL_RnsR	HP-S-S-LC-LC-SM	HP-S-S-LC-LC-SM	SM	LC	LC	LC	SM	SM	LC	SM	SM	(7,5)	4					4.3(3.0)--pm(>>,forward)				2.0(0.3)--pm(<<,backward)
3k1v.cif1	41	A.A.25.|A.G.2.-A.C.21.	A.A.26.|A.A.3.-A.U.20.	AnsA_LnsL_RnsR	HP-S-S-LC-LC-SM	HP-S-S-LC-LC-SM	SM	LC	LC	LC	SM	SM	LC	SM	SM	(7,5)	4	2.4(1.1)--pm(>>,forward)				4.3(3.0)--pm(>>,forward)				2.0(0.3)--pm(<<,backward)
3k1v.cif1	41	A.A.25.|A.A.3.-A.U.20.	A.A.26.|A.A.3.-A.U.20.	AnsA_LeL_ReR	HP-S-S-LC-LC-SM	HP-S-S-LC-LC-SM	SM	LC	LC	LC	SM	SM	LC	SM	SM	(7,5)	4	2.4(1.1)--pm(>>,forward)
3k1v.cif1	41	A.A.25.|A.A.3.-A.U.20.	A.A.27.|A.G.4.-A.C.19.	LnsL_RnR	HP-S-S-LC-LC-SM	HP-S-S-LC-LC-SM	SM	LC	LC	LC	SM	SM	LC	SM	SM	(7,5)	4					3.4(3.2)--pm(>>,forward)
3k1v.cif1	41	A.A.26.|A.A.3.-A.U.20.	A.A.27.|A.G.4.-A.C.19.	AnA_LnsL_RnR	HP-S-S-LC-LC-SM	HP-S-S-LC-LC-SM	SM	LC	LC	LC	SM	SM	LC	SM	SM	(7,5)	4					3.4(3.2)--pm(>>,forward)
3k1v.cif1	41	A.A.27.|A.G.4.-A.C.19.	A.A.28.|A.G.5.-A.C.18.	AnsA_LnsL_RnR	HP-S-S-LC-LC-SM	HP-S-S-LC-LC-SM	SM	LC	LC	LC	SM	SM	LC	SM	SM	(7,5)	4	5.5(4.0)--pm(>>,forward)				3.4(2.1)--pm(>>,forward)
3k1v.cif1	41	A.A.27.|A.G.4.-A.C.19.	A.A.29.|A.G.5.-A.C.18.	LnsL_RnR	HP-S-S-LC-LC-SM	HP-S-S-LC-LC-SM	SM	LC	LC	LC	SM	SM	LC	SM	SM	(7,5)	4					3.4(2.1)--pm(>>,forward)
3k1v.cif1	41	A.A.28.|A.G.5.-A.C.18.	A.A.29.|A.G.5.-A.C.18.	AnA_LeL_ReR	HP-S-S-LC-LC-SM	HP-S-S-LC-LC-SM	SM	LC	LC	LC	SM	SM	LC	SM	SM	(7,5)	4
3k1v.cif1	41	A.A.28.|A.G.5.-A.C.18.	A.A.30.|A.C.17.-A.PRF.301.	LsR_RnL_RsR	HP-S-S-LC-LC-SM	HP-HP-NA-SM-NA-NA	SM	SM	NA	LC	LC	NA	LC	LC	NA	(7,5)	4						1.7(0.5)--pm(>>,forward)			3.1(0.6)--mm(<>,outward)
3k1v.cif1	41	A.A.29.|A.G.5.-A.C.18.	A.A.30.|A.C.17.-A.PRF.301.	AnsA_LsR_RnL_RsR	HP-S-S-LC-LC-SM	HP-HP-NA-SM-NA-NA	SM	SM	NA	LC	LC	NA	LC	LC	NA	(7,5)	4	5.7(4.3)--pm(>>,forward)					1.7(0.5)--pm(>>,forward)			3.1(0.6)--mm(<>,outward)
3la5.cif1	42	A.A.33.|A.G.37.-A.C.61.	A.A.65.|A.G.37.-A.C.61.	LeL_ReR	HP-S-S-LC-LC-SM	HP-S-S-LC-LC-SM	LR	LC	LC	LC	SM	SM	LC	SM	SM	(3,2)	4
3la5.cif1	42	A.A.33.|A.G.37.-A.C.61.	A.A.66.|A.G.38.-A.C.60.	LnsL_RnsR	HP-S-S-LC-LC-SM	HP-S-S-LC-LC-SM	LR	LC	LC	LC	SM	SM	LC	SM	SM	(3,2)	4					7.4(5.2)--pm(>>,forward)				1.5(0.1)--pm(<<,backward)
3la5.cif1	42	A.A.65.|A.G.37.-A.C.61.	A.A.66.|A.G.38.-A.C.60.	AnsA_LnsL_RnsR	HP-S-S-LC-LC-SM	HP-S-S-LC-LC-SM	SM	LC	LC	LC	SM	SM	LC	SM	SM	(3,2)	4	6.5(4.7)--pm(>>,forward)				7.4(5.2)--pm(>>,forward)				1.5(0.1)--pm(<<,backward)
3moj.cif1	43	A.A.2564.|A.C.2521.-A.G.2543.	A.A.2565.|A.C.2520.-A.G.2544.	AnsA_LnL_RnsR	JC-S-S-LC-LC-SM	JC-S-S-LC-LC-SM	SM	LC	LC	LC	SM	SM	LC	SM	SM	(2,2)	3	6.3(4.3)--pm(>>,forward)								3.9(2.1)--pm(>>,forward)
3mxh.cif1	44	R.A.18.|R.C.92.-R.C2E.1.	R.A.47.|R.C.92.-R.C2E.1.	LeL_ReR_RsA	JC-JC-NA-SM-NA-NA	JC-JC-NA-SM-NA-NA	SM	SM	NA	SM	SM	NA	NA	NA	NA	(3,3)	6							6.9(4.5)--pp(><,inward)
3mxh.cif1	44	R.A.18.|R.C.92.-R.C2E.1.	R.A.95.|R.G.14.-R.C.93.	LnsR_RsL	JC-JC-NA-SM-NA-NA	HC-S-S-LC-LC-SM	LR	LC	LC	LR	LC	LC	NA	NA	NA	(3,3)	6						1.9(0.4)--pm(>>,forward)		2.5(0.9)--pm(<<,backward)
3mxh.cif1	45	R.A.34.|R.U.60.-R.A.78.	R.A.35.|R.C.59.-R.G.79.	AnsA_LnL_RnsR	HC-S-S-LR-LR-SM	HC-S-S-LR-LR-SM	SM	LR	LR	LR	SM	SM	LR	SM	SM	(3,2)	4	5.7(4.1)--pm(>>,forward)								3.4(2.9)--pm(>>,forward)
3mxh.cif1	45	R.A.34.|R.U.60.-R.A.78.	R.A.62.|R.U.60.-R.A.78.	LeL_ReR	HC-S-S-LR-LR-SM	BC-S-S-LC-LC-SM	LR	LR	LR	LC	SM	SM	LC	SM	SM	(3,2)	4
3mxh.cif1	45	R.A.35.|R.C.59.-R.G.79.	R.A.62.|R.U.60.-R.A.78.	LnL_RnsR	HC-S-S-LR-LR-SM	BC-S-S-LC-LC-SM	LR	LR	LR	LC	SM	SM	LC	SM	SM	(3,2)	4									3.4(2.9)--pm(<<,backward)
3mxh.cif1	44	R.A.47.|R.C.92.-R.C2E.1.	R.A.95.|R.G.14.-R.C.93.	LnsR_RsL	JC-JC-NA-SM-NA-NA	HC-S-S-LC-LC-SM	LR	LC	LC	LR	LC	LC	NA	NA	NA	(3,3)	6						1.9(0.4)--pm(>>,forward)		2.5(0.9)--pm(<<,backward)
3mxh.cif1	44	R.A.95.|R.C.13.-R.G.94.	R.A.95.|R.G.14.-R.C.93.	AeA_LnL_RnA_RnsR	HC-S-S-LC-LC-SM	HC-S-S-LC-LC-SM	SM	LC	LC	LC	SM	SM	LC	SM	SM	(3,3)	6									3.6(1.8)--pm(<<,backward)
3nkb.cif1	46	B.A.64.|B.C.20.-B.G.28.	B.A.65.|B.C.19.-B.G.29.	AnsA_LnL_RnsR	JI-S-S-LC-LC-SM	JI-S-S-LC-LC-SM	SM	LC	LC	LC	SM	SM	LC	SM	SM	(2,2)	3	6.3(4.1)--pm(>>,forward)								4.7(3.3)--pm(>>,forward)
3npq.cif1	47	A.A.43.|A.G.5.-A.C.34.	A.A.44.|A.A.6.-A.U.33.	AnsA_LnsL_RnsR	IP-S-S-LC-LC-SM	IP-S-S-LC-LC-SM	SM	LC	LC	LC	SM	SM	LC	SM	SM	(3,3)	3	0.6(0.6)--pm(>>,forward)				3.9(2.5)--pm(>>,forward)				2.8(0.9)--pm(<<,backward)
3npq.cif1	47	A.A.44.|A.A.6.-A.U.33.	A.A.45.|A.G.7.-A.C.32.	AnsA_LnsL_RnsR	IP-S-S-LC-LC-SM	IP-S-S-LC-LC-SM	SM	LC	LC	LC	SM	SM	LC	SM	SM	(3,3)	3	5.8(4.2)--pm(>>,forward)				2.6(2.5)--pm(>>,forward)				0.9(0.1)--pm(<<,backward)
3oxe.cif1	48	A.A.40.|B.C.5.-B.G.84.	A.A.40.|B.U.6.-B.A.83.	AeA_LnsL_RnsR	IC-S-S-LR-LR-SM	IC-S-S-LR-LR-SM	SM	LR	LR	LR	SM	SM	LR	SM	SM	(4,3)	4					1.7(0.6)--pm(>>,forward)				1.2(1.2)--pm(<<,backward)
3oxe.cif1	48	A.A.40.|B.C.5.-B.G.84.	A.A.41.|B.C.5.-B.G.84.	AnsA_LeL_ReR	IC-S-S-LR-LR-SM	IC-S-S-LR-LR-SM	SM	LR	LR	LR	SM	SM	LR	SM	SM	(4,3)	4	6.5(4.7)--pm(>>,forward)
3oxe.cif1	48	A.A.40.|B.C.5.-B.G.84.	A.A.63.|B.U.6.-B.A.83.	AsA_LnsL_RnsR	IC-S-S-LR-LR-SM	IC-S-S-LR-LR-SM	SM	LR	LR	LR	SM	SM	LR	SM	SM	(4,3)	4	4.6(1.9)--mm(<>,outward)				1.7(0.6)--pm(>>,forward)				1.2(1.2)--pm(<<,backward)
3oxe.cif1	48	A.A.40.|B.U.6.-B.A.83.	A.A.41.|B.C.5.-B.G.84.	AnsA_LnsL_RnsR	IC-S-S-LR-LR-SM	IC-S-S-LR-LR-SM	SM	LR	LR	LR	SM	SM	LR	SM	SM	(4,3)	4	6.5(4.7)--pm(>>,forward)				1.7(0.6)--pm(<<,backward)				1.2(1.2)--pm(>>,forward)
3oxe.cif1	48	A.A.40.|B.U.6.-B.A.83.	A.A.63.|B.U.6.-B.A.83.	AsA_LeL_ReR	IC-S-S-LR-LR-SM	IC-S-S-LR-LR-SM	SM	LR	LR	LR	SM	SM	LR	SM	SM	(4,3)	4	4.6(1.9)--mm(<>,outward)
3oxe.cif1	48	A.A.40.|B.U.6.-B.A.83.	A.A.64.|B.G.7.-B.C.82.	LnL_RnsR_RsL	IC-S-S-LR-LR-SM	IC-S-S-LR-LR-SM	SM	LR	LR	LR	SM	SM	LR	SM	SM	(4,3)	4								1.9(1.1)--mm(<>,outward)	0.6(0.2)--pm(<<,backward)
3oxe.cif1	48	A.A.41.|B.C.5.-B.G.84.	A.A.63.|B.U.6.-B.A.83.	LnsL_RnsR	IC-S-S-LR-LR-SM	IC-S-S-LR-LR-SM	SM	LR	LR	LR	SM	SM	LR	SM	SM	(4,3)	4					1.7(0.6)--pm(>>,forward)				1.2(1.2)--pm(<<,backward)
3oxe.cif1	48	A.A.63.|B.U.6.-B.A.83.	A.A.64.|B.G.7.-B.C.82.	AnsA_LnL_RnsR_RsL	IC-S-S-LR-LR-SM	IC-S-S-LR-LR-SM	SM	LR	LR	LR	SM	SM	LR	SM	SM	(4,3)	4	4.0(3.1)--pm(>>,forward)							1.9(1.1)--mm(<>,outward)	0.6(0.2)--pm(<<,backward)
3oxe.cif1	49	B.A.40.|A.U.6.-A.A.83.	B.A.41.|A.C.5.-A.G.84.	AnsA_LnsL_RnsR	IC-S-S-LR-LR-SM	IC-S-S-LR-LR-SM	SM	LR	LR	LR	SM	SM	LR	SM	SM	(4,3)	4	6.8(4.9)--pm(>>,forward)				2.1(0.8)--pm(<<,backward)				0.9(0.9)--pm(>>,forward)
3oxe.cif1	49	B.A.40.|A.U.6.-A.A.83.	B.A.63.|A.U.6.-A.A.83.	AsA_LeL_ReR	IC-S-S-LR-LR-SM	IC-S-S-LR-LR-SM	SM	LR	LR	LR	SM	SM	LR	SM	SM	(4,3)	4	4.5(1.7)--mm(<>,outward)
3oxe.cif1	49	B.A.40.|A.U.6.-A.A.83.	B.A.64.|A.G.7.-A.C.82.	LnL_RnR_RsL	IC-S-S-LR-LR-SM	IC-S-S-LR-LR-SM	SM	LR	LR	LR	SM	SM	LR	SM	SM	(4,3)	4								2.1(1.3)--mm(<>,outward)
3oxe.cif1	49	B.A.41.|A.C.5.-A.G.84.	B.A.63.|A.U.6.-A.A.83.	LnsL_RnsR	IC-S-S-LR-LR-SM	IC-S-S-LR-LR-SM	SM	LR	LR	LR	SM	SM	LR	SM	SM	(4,3)	4					2.1(0.8)--pm(>>,forward)				0.9(0.9)--pm(<<,backward)
3oxe.cif1	49	B.A.63.|A.U.6.-A.A.83.	B.A.64.|A.G.7.-A.C.82.	AnsA_LnL_RnR_RsL	IC-S-S-LR-LR-SM	IC-S-S-LR-LR-SM	SM	LR	LR	LR	SM	SM	LR	SM	SM	(4,3)	4	4.0(3.0)--pm(>>,forward)							2.1(1.3)--mm(<>,outward)
3p22.cif1	50	B.A.3.|A.G.6.-A.C.35.	B.A.4.|A.G.7.-A.C.34.	AnsA_LnsL_RnR	HP-S-S-LC-LC-SM	HP-S-S-LC-LC-SM	SM	LC	LC	LC	SM	SM	LC	SM	SM	(2,2)	3	6.7(4.5)--pm(>>,forward)				4.5(2.7)--pm(>>,forward)
3pdr.cif1	51	X.A.70.|X.G.22.-X.C.163.	X.A.71.|X.G.22.-X.C.163.	AnsA_LeL_ReR	HC-S-S-LR-LR-SM	HC-S-S-LR-LR-SM	SM	LR	LR	LR	SM	SM	LR	SM	SM	(2,1)	3	6.6(4.7)--pm(>>,forward)
3pdr.cif1	52	X.A.87.|X.C.58.-X.G.83.	X.A.90.|X.C.59.-X.G.82.	LnL_RnsR	JC-S-S-LC-LC-SM	JC-S-S-LC-LC-SM	SM	LC	LC	LC	SM	SM	LC	SM	SM	(3,3)	4									4.1(2.8)--pm(<<,backward)
3pdr.cif1	52	X.A.87.|X.C.58.-X.G.83.	X.A.117.|X.C.57.-X.G.84.	AsA_LnL_RnsR	JC-S-S-LC-LC-SM	JC-S-S-LC-LC-SM	SM	LC	LC	LC	SM	SM	LC	SM	SM	(3,3)	4	4.9(2.3)--mm(<>,outward)								4.3(2.8)--pm(>>,forward)
3pdr.cif1	53	X.A.105.|X.C.68.-X.G.73.	X.A.106.|X.C.68.-X.G.73.	AnsA_LeL_ReR	HC-S-S-LR-LR-SM	HC-S-S-LR-LR-SM	SM	LR	LR	LR	SM	SM	LR	SM	SM	(2,1)	3	6.2(4.3)--pm(>>,forward)
3rkf.cif1	54	C.A.33.|C.A.37.-C.U.61.	C.A.65.|C.A.37.-C.U.61.	LeL_ReR	HP-S-S-LC-LC-SM	HP-S-S-LC-LC-SM	LR	LC	LC	LC	SM	SM	LC	SM	SM	(3,2)	4
3rkf.cif1	54	C.A.33.|C.A.37.-C.U.61.	C.A.66.|C.G.38.-C.C.60.	LnsL_RnsR	HP-S-S-LC-LC-SM	HP-S-S-LC-LC-SM	LR	LC	LC	LC	SM	SM	LC	SM	SM	(3,2)	4					4.2(3.1)--pm(>>,forward)				3.6(1.2)--pm(<<,backward)
3rkf.cif1	54	C.A.65.|C.A.37.-C.U.61.	C.A.66.|C.G.38.-C.C.60.	AnsA_LnsL_RnsR	HP-S-S-LC-LC-SM	HP-S-S-LC-LC-SM	SM	LC	LC	LC	SM	SM	LC	SM	SM	(3,2)	4	3.8(3.2)--pm(>>,forward)				4.2(3.1)--pm(>>,forward)				3.6(1.2)--pm(<<,backward)
3sux.cif1	55	X.A.25.|X.G.22.-X.C.75.	X.A.26.|X.C.21.-X.G.76.	AnA_LnL_LsR_RnsR	JC-S-S-LC-LC-SM	JC-S-S-LC-LC-SM	SM	LC	LC	LC	SM	SM	LC	SM	SM	(3,3)	4						4.3(1.5)--mm(<>,outward)			0.4(0.1)--pm(>>,forward)
3sux.cif1	55	X.A.25.|X.G.22.-X.C.75.	X.A.61.|X.U.23.-X.G.74.	LnsL_RnsR	JC-S-S-LC-LC-SM	IPJC-S-S-LC-LC-SM	SM	LC	LC	LC	SM	SM	LC	SM	SM	(3,3)	4					6.6(4.2)--pm(>>,forward)				7.4(4.3)--pm(<<,backward)
3v7e.cif1	56	C.A.93.|C.G.22.-C.C.30.	C.A.94.|C.G.23.-C.C.29.	AnsA_LnsL_RnR	IP-S-S-LC-LC-SM	IP-S-S-LC-LC-SM	SM	LC	LC	LC	SM	SM	LC	SM	SM	(2,2)	3	5.6(4.0)--pm(>>,forward)				3.9(2.6)--pm(>>,forward)
4aob.cif1	57	A.A.36.|A.G.21.-A.U.31.	A.A.61.|A.A.22.-A.U.30.	LnsL_RnsR	ICIP-S-S-LC-LC-SM	IP-S-S-LC-LC-SM	SM	LC	LC	LC	SM	SM	LC	SM	SM	(3,3)	4					4.6(2.6)--pm(>>,forward)				2.3(0.7)--pm(<<,backward)
4aob.cif1	57	A.A.61.|A.A.22.-A.U.30.	A.A.62.|A.G.23.-A.C.29.	AnsA_LnsL_RnR	IP-S-S-LC-LC-SM	IP-S-S-LC-LC-SM	SM	LC	LC	LC	SM	SM	LC	SM	SM	(3,3)	4	5.4(4.1)--pm(>>,forward)				2.4(2.3)--pm(>>,forward)
4b3r.cif1	58	A.A.1492.|W.U.2.-Z.A.35.	A.A.1493.|W.U.1.-Z.A.36.	AnsA_LnL_RnsR	IC-S-S-LR-LR-SM	IC-S-S-LR-LR-SM	SM	LR	LR	LR	SM	SM	LR	SM	SM	(2,2)	3	4.9(2.4)--pm(>>,forward)								3.7(2.2)--pm(>>,forward)
4enc.cif1	59	A.A.20.|A.G.2.-A.C.17.	A.A.21.|A.G.3.-A.C.16.	AnsA_LnsL_RnR	IP-S-S-LC-LC-SM	IP-S-S-LC-LC-SM	SM	LC	LC	LC	SM	SM	LC	SM	SM	(2,2)	3	7.2(5.0)--pm(>>,forward)				3.8(2.3)--pm(>>,forward)
4far.cif1	60	A.A.67.|A.C.23.-A.G.248.	A.A.121.|A.U.24.-A.A.247.	LnL_RnsR	JP-S-S-LR-LR-SM	JP-S-S-LR-LR-SM	SM	LR	LR	LR	SM	SM	LR	SM	SM	(2,2)	4									3.4(3.0)--pm(<<,backward)
4far.cif1	61	A.A.134.|A.C.360.-A.G.383.	A.A.143.|A.C.361.-A.G.382.	LnsL_RnsR	BCJP-S-S-LR-LR-SM	BCJP-S-S-LR-LR-SM	SM	LR	LR	LR	SM	SM	LR	SM	SM	(2,2)	3					1.3(0.3)--pm(>>,forward)				3.1(1.6)--pm(<<,backward)
4far.cif1	62	A.A.192.|A.C.127.-A.G.239.	A.A.193.|A.C.127.-A.G.239.	AnsA_LeL_ReR	ICJP-S-S-LC-LC-SM	ICJP-S-S-LC-LC-SM	SM	LC	LC	LC	SM	SM	LC	SM	SM	(2,1)	3	5.8(4.3)--pm(>>,forward)
4far.cif1	63	A.A.318.|A.C.7.-A.G.265.	A.A.319.|A.C.6.-A.G.266.	AnsA_LnL_RnsR	IC-S-S-LR-LR-SM	IC-S-S-LR-LR-SM	SM	LR	LR	LR	SM	SM	LR	SM	SM	(2,2)	3	5.1(3.5)--pm(>>,forward)								4.1(2.6)--pm(>>,forward)
4fen.cif1	64	B.A.33.|B.G.37.-B.C.61.	B.A.65.|B.G.37.-B.C.61.	LeL_ReR	HP-S-S-LC-LC-SM	HP-S-S-LC-LC-SM	LR	LC	LC	LC	SM	SM	LC	SM	SM	(3,2)	4
4fen.cif1	64	B.A.33.|B.G.37.-B.C.61.	B.A.66.|B.G.38.-B.C.60.	LnsL_RnsR	HP-S-S-LC-LC-SM	HP-S-S-LC-LC-SM	LR	LC	LC	LC	SM	SM	LC	SM	SM	(3,2)	4					7.3(5.0)--pm(>>,forward)				2.0(0.2)--pm(<<,backward)
4fen.cif1	64	B.A.65.|B.G.37.-B.C.61.	B.A.66.|B.G.38.-B.C.60.	AnsA_LnsL_RnsR	HP-S-S-LC-LC-SM	HP-S-S-LC-LC-SM	SM	LC	LC	LC	SM	SM	LC	SM	SM	(3,2)	4	6.2(4.5)--pm(>>,forward)				7.3(5.0)--pm(>>,forward)				2.0(0.2)--pm(<<,backward)
4frg.cif1	65	B.A.21.|B.A.43.-B.U.54.	B.A.22.|B.G.42.-B.C.64.	AnsA_LnsL	JI-S-S-LR-LR-SM	JI-S-S-LC-LC-SM	SM	LC	LC	LR	LR	LR	LR	LR	LR	(2,2)	5	7.0(5.0)--pm(>>,forward)				1.3(0.2)--pm(<<,backward)
4l81.cif1	66	A.A.86.|A.U.29.-A.A.44.	A.A.89.|A.G.30.-A.C.42.	LnsL_RsL	JP-S-S-LC-LC-SM	JP-S-S-LC-LC-SM	SM	LC	LC	LC	LR	LR	LC	LR	LR	(3,3)	5					0.8(0.4)--pm(>>,forward)			2.3(0.2)--mm(<>,outward)
4l81.cif1	66	A.A.89.|A.G.30.-A.C.42.	A.A.90.|A.G.31.-A.C.41.	AnsA_LnsL_RnR	JP-S-S-LC-LC-SM	JP-S-S-LC-LC-SM	SM	LC	LC	LC	SM	SM	LC	SM	SM	(3,3)	5	4.3(3.1)--pm(>>,forward)				4.5(3.2)--pm(>>,forward)
4lvw.cif1	67	A.A.22.|A.G.19.-A.C.66.	A.A.23.|A.C.18.-A.G.67.	AnA_LnL_LsR_RnsR	JC-S-S-LC-LC-SM	JC-S-S-LC-LC-SM	SM	LC	LC	LC	SM	SM	LC	SM	SM	(3,3)	4						3.9(1.2)--mm(<>,outward)			0.6(0.1)--pm(>>,forward)
4lvw.cif1	67	A.A.22.|A.G.19.-A.C.66.	A.A.56.|A.U.20.-A.G.65.	LnsL_RnsR	JC-S-S-LC-LC-SM	IPJC-S-S-LC-LC-SM	SM	LC	LC	LC	SM	SM	LC	SM	SM	(3,3)	4					7.2(4.4)--pm(>>,forward)				7.4(4.4)--pm(<<,backward)
4lx6.cif1	68	A.A.33.|A.G.37.-A.C.61.	A.A.65.|A.G.37.-A.C.61.	LeL_ReR	HP-S-S-LC-LC-SM	HP-S-S-LC-LC-SM	LR	LC	LC	LC	SM	SM	LC	SM	SM	(3,2)	4
4lx6.cif1	68	A.A.33.|A.G.37.-A.C.61.	A.A.66.|A.G.38.-A.C.60.	LnsL_RnR	HP-S-S-LC-LC-SM	HP-S-S-LC-LC-SM	LR	LC	LC	LC	SM	SM	LC	SM	SM	(3,2)	4					7.1(4.7)--pm(>>,forward)
4lx6.cif1	68	A.A.65.|A.G.37.-A.C.61.	A.A.66.|A.G.38.-A.C.60.	AnsA_LnsL_RnR	HP-S-S-LC-LC-SM	HP-S-S-LC-LC-SM	SM	LC	LC	LC	SM	SM	LC	SM	SM	(3,2)	4	5.8(4.2)--pm(>>,forward)				7.1(4.7)--pm(>>,forward)
4oji.cif1	69	A.A.39.|A.C.15.-A.G.19.	A.A.40.|A.C.14.-A.G.30.	AnsA_LnL_RsR	BIHP-HP-HP-LR-LR-SM	BIHP-S-S-LC-LC-SM	SM	LC	LC	LR	LC	LC	LR	LC	LC	(2,2)	4	6.8(4.7)--pm(>>,forward)								5.2(3.7)--pm(>>,forward)
4p95.cif1	70	A.A.2.|A.C.317.-A.G.322.	A.A.286.|A.C.316.-A.G.323.	LnL_RnsR	II-S-S-LR-LR-SM	HPJP-S-S-LC-LC-SM	LR	LR	LR	LC	SM	SM	LC	SM	SM	(2,2)	4									3.8(2.4)--pm(>>,forward)
4p95.cif1	71	A.A.275.|A.C.345.-A.G.543.	A.A.276.|A.C.344.-A.G.544.	AnsA_LnL_RnsR	HPJC-S-S-LC-LC-SM	HPJC-S-S-LC-LC-SM	SM	LC	LC	LC	SM	SM	LC	SM	SM	(2,2)	3	7.0(5.2)--pm(>>,forward)								4.4(3.1)--pm(>>,forward)
4p95.cif1	72	A.A.307.|A.G.289.-A.C.313.	A.A.308.|A.G.290.-A.C.312.	AnsA_LnsL_RnR	IC-S-S-LC-LC-SM	IC-S-S-LC-LC-SM	SM	LC	LC	LC	SM	SM	LC	SM	SM	(2,2)	3	6.6(4.6)--pm(>>,forward)				4.1(2.7)--pm(>>,forward)
4p95.cif1	73	A.A.569.|A.A.19.-A.U.222.	A.A.570.|A.C.18.-A.G.223.	AnsA_LnsL_LsR_RnsR	HC-S-S-LR-LR-SM	HC-S-S-LR-LR-SM	SM	LR	LR	LR	SM	SM	LR	SM	SM	(3,3)	5	5.2(3.7)--pm(>>,forward)				0.4(0.1)--pm(<<,backward)	2.1(1.1)--mm(<>,outward)			0.6(0.1)--pm(>>,forward)
4p95.cif1	73	A.A.570.|A.C.18.-A.G.223.	A.A.571.|A.A.17.-A.G.224.	AnsA_LnsL_RnsR	HC-S-S-LR-LR-SM	HC-IC-IC-LR-LR-SM	SM	LR	LR	LR	LC	LC	LR	LC	LC	(3,3)	5	2.4(1.3)--pm(>>,forward)				5.5(3.7)--pm(<<,backward)				5.3(2.2)--pm(>>,forward)
4pr6.cif1	74	B.A.165.|B.C.119.-B.G.128.	B.A.166.|B.C.118.-B.G.129.	AnsA_LnsL_RnsR	JI-S-S-LC-LC-SM	JI-S-S-LC-LC-SM	SM	LC	LC	LC	SM	SM	LC	SM	SM	(2,2)	3	6.0(3.9)--pm(>>,forward)				0.7(0.1)--pm(<<,backward)				5.2(3.7)--pm(>>,forward)
4prf.cif1	75	B.A.165.|B.C.119.-B.G.128.	B.A.166.|B.C.118.-B.G.129.	AnsA_LnL_RnsR	JI-S-S-LC-LC-SM	JI-S-S-LC-LC-SM	SM	LC	LC	LC	SM	SM	LC	SM	SM	(2,2)	3	5.5(3.2)--pm(>>,forward)								5.2(3.2)--pm(>>,forward)
4qlm.cif1	76	A.A.10.|A.C.23.-A.G.105.	A.2BA.204.|A.G.24.-A.C.104.	AsA_LnL_RnR_RsL	IC-S-S-LC-LC-SM	NA-S-S-NA-NA-SM	NA	LC	LC	NA	SM	SM	NA	SM	SM	(2,2)	3	2.4(0.9)--mm(<>,outward)							5.0(2.3)--mm(<>,outward)
4qlm.cif1	77	A.A.45.|A.G.68.-A.C.85.	A.2BA.203.|A.G.69.-A.C.84.	AsA_LnsL_RnR	JC-S-S-LC-LC-SM	NA-S-S-NA-NA-SM	NA	LC	LC	NA	SM	SM	NA	SM	SM	(2,2)	3	1.7(0.4)--mm(<>,outward)				3.1(1.2)--pm(>>,forward)
4rge.cif1	78	C.A.42.|C.C.14.-C.G.25.	C.A.43.|C.C.13.-C.G.36.	AnsA_LnL_RsR	BIHP-S-S-LR-LR-SM	BIHP-S-S-LC-LC-SM	SM	LC	LC	LR	LR	LR	LR	LR	LR	(2,2)	5	7.0(5.4)--pm(>>,forward)								3.9(1.1)--pm(>>,forward)
4rmo.cif1	79	B.A.27.|B.C.8.-B.G.25.	B.A.29.|B.C.8.-B.G.25.	LeL_ReR	HP-S-S-LC-LC-SM	HP-S-S-LC-LC-SM	SM	LC	LC	LC	SM	SM	LC	SM	SM	(4,3)	3
4rmo.cif1	79	B.A.27.|B.C.8.-B.G.25.	B.A.29.|B.C.9.-B.G.24.	LnsL_RnsR	HP-S-S-LC-LC-SM	HP-S-S-LC-LC-SM	SM	LC	LC	LC	SM	SM	LC	SM	SM	(4,3)	3					0.7(0.1)--pm(>>,forward)				3.1(1.5)--pm(<<,backward)
4rmo.cif1	79	B.A.27.|B.C.8.-B.G.25.	B.A.31.|B.C.9.-B.G.24.	LnsL_RnsR	HP-S-S-LC-LC-SM	HP-S-S-LC-LC-SM	SM	LC	LC	LC	SM	SM	LC	SM	SM	(4,3)	3					0.7(0.1)--pm(>>,forward)				3.1(1.5)--pm(<<,backward)
4rmo.cif1	79	B.A.29.|B.C.8.-B.G.25.	B.A.29.|B.C.9.-B.G.24.	AeA_LnsL_RnsR	HP-S-S-LC-LC-SM	HP-S-S-LC-LC-SM	SM	LC	LC	LC	SM	SM	LC	SM	SM	(4,3)	3					0.7(0.1)--pm(>>,forward)				3.1(1.5)--pm(<<,backward)
4rmo.cif1	79	B.A.29.|B.C.8.-B.G.25.	B.A.31.|B.C.9.-B.G.24.	AsA_LnsL_RnsR	HP-S-S-LC-LC-SM	HP-S-S-LC-LC-SM	SM	LC	LC	LC	SM	SM	LC	SM	SM	(4,3)	3	5.0(3.6)--pm(>>,forward)				0.7(0.1)--pm(>>,forward)				3.1(1.5)--pm(<<,backward)
4rmo.cif1	79	B.A.29.|B.C.8.-B.G.25.	B.A.31.|B.A.10.-B.U.23.	AsA	HP-S-S-LC-LC-SM	HP-S-S-LC-LC-SM	SM	LC	LC	LC	SM	SM	LC	SM	SM	(4,3)	3	5.0(3.6)--pm(>>,forward)
4rmo.cif1	79	B.A.29.|B.C.9.-B.G.24.	B.A.31.|B.C.9.-B.G.24.	AsA_LeL_ReR	HP-S-S-LC-LC-SM	HP-S-S-LC-LC-SM	SM	LC	LC	LC	SM	SM	LC	SM	SM	(4,3)	3	5.0(3.6)--pm(>>,forward)
4rmo.cif1	79	B.A.29.|B.C.9.-B.G.24.	B.A.31.|B.A.10.-B.U.23.	AsA_LnsL_RnsR	HP-S-S-LC-LC-SM	HP-S-S-LC-LC-SM	SM	LC	LC	LC	SM	SM	LC	SM	SM	(4,3)	3	5.0(3.6)--pm(>>,forward)				1.9(0.5)--pm(>>,forward)				1.7(0.4)--pm(<<,backward)
4rmo.cif1	79	B.A.29.|B.C.9.-B.G.24.	B.A.33.|B.A.10.-B.U.23.	LnsL_RnsR	HP-S-S-LC-LC-SM	HP-S-S-LC-LC-SM	SM	LC	LC	LC	SM	SM	LC	SM	SM	(4,3)	3					1.9(0.5)--pm(>>,forward)				1.7(0.4)--pm(<<,backward)
4rmo.cif1	79	B.A.31.|B.C.9.-B.G.24.	B.A.31.|B.A.10.-B.U.23.	AeA_LnsL_RnsR	HP-S-S-LC-LC-SM	HP-S-S-LC-LC-SM	SM	LC	LC	LC	SM	SM	LC	SM	SM	(4,3)	3					1.9(0.5)--pm(>>,forward)				1.7(0.4)--pm(<<,backward)
4rmo.cif1	79	B.A.31.|B.C.9.-B.G.24.	B.A.33.|B.A.10.-B.U.23.	LnsL_RnsR	HP-S-S-LC-LC-SM	HP-S-S-LC-LC-SM	SM	LC	LC	LC	SM	SM	LC	SM	SM	(4,3)	3					1.9(0.5)--pm(>>,forward)				1.7(0.4)--pm(<<,backward)
4rmo.cif1	79	B.A.31.|B.A.10.-B.U.23.	B.A.33.|B.A.10.-B.U.23.	LeL_ReR	HP-S-S-LC-LC-SM	HP-S-S-LC-LC-SM	SM	LC	LC	LC	SM	SM	LC	SM	SM	(4,3)	3
4v88.cif1	80	A6.A.47.|A6.U.98.-A6.A.385.	A6.A.100.|A6.U.98.-A6.A.385.	AsA_LeL_ReR	JC-S-S-LR-LR-SM	JC-S-S-LC-LC-SM	LR	LR	LR	LC	SM	SM	LC	SM	SM	(3,2)	5	4.3(1.7)--pm(>>,forward)
4v88.cif1	80	A6.A.47.|A6.U.98.-A6.A.385.	A6.A.425.|A6.C.97.-A6.G.386.	AsA_LnsL_RnsR	JC-S-S-LR-LR-SM	JCJP-S-S-LC-LC-SM	LR	LR	LR	LC	SM	SM	LC	SM	SM	(3,2)	5	5.0(4.3)--mm(<>,outward)				2.2(0.7)--pm(<<,backward)				4.3(3.3)--pm(>>,forward)
4v88.cif1	81	A6.A.61.|A6.G.269.-A6.C.286.	A6.A.62.|A6.C.268.-A6.G.287.	AnsA_LnL_LsR_RnR	IC-S-S-LR-LR-SM	IC-S-S-LR-LR-SM	SM	LR	LR	LR	SM	SM	LR	SM	SM	(2,2)	3	7.2(5.3)--pm(>>,forward)					4.3(1.5)--mm(<>,outward)
4v88.cif1	80	A6.A.100.|A6.U.98.-A6.A.385.	A6.A.425.|A6.C.97.-A6.G.386.	LnsL_RnsR	JC-S-S-LC-LC-SM	JCJP-S-S-LC-LC-SM	LR	LC	LC	LC	SM	SM	LC	SM	SM	(3,2)	5					2.2(0.7)--pm(<<,backward)				4.3(3.3)--pm(>>,forward)
4v88.cif1	82	A6.A.147.|A6.U.64.-A6.A.86.	A6.A.168.|A6.G.63.-A6.C.87.	AsA_LnsL_RnsR	JC-S-S-LR-LR-SM	JC-S-S-LR-LR-SM	SM	LR	LR	LR	SM	SM	LR	SM	SM	(3,2)	4	2.1(0.2)--mm(<>,outward)				3.5(1.5)--pm(<<,backward)				1.0(0.7)--pm(>>,forward)
4v88.cif1	82	A6.A.147.|A6.U.64.-A6.A.86.	A6.A.168.|A6.U.64.-A6.A.86.	AsA_LeL_ReR	JC-S-S-LR-LR-SM	JC-S-S-LR-LR-SM	SM	LR	LR	LR	SM	SM	LR	SM	SM	(3,2)	4	2.1(0.2)--mm(<>,outward)
4v88.cif1	82	A6.A.147.|A6.U.64.-A6.A.86.	A6.A.169.|A6.G.63.-A6.C.87.	LnsL_RnsR	JC-S-S-LR-LR-SM	JC-S-S-LR-LR-SM	SM	LR	LR	LR	SM	SM	LR	SM	SM	(3,2)	4					3.5(1.5)--pm(<<,backward)				1.0(0.7)--pm(>>,forward)
4v88.cif1	83	A6.A.156.|A6.C.414.-A6.G.419.	A6.A.157.|A6.C.414.-A6.G.419.	AnsA_LeL_ReR	HC-S-S-LR-LR-SM	HC-S-S-LR-LR-SM	SM	LR	LR	LR	SM	SM	LR	SM	SM	(2,1)	3	5.1(2.1)--pm(>>,forward)
4v88.cif1	82	A6.A.168.|A6.G.63.-A6.C.87.	A6.A.168.|A6.U.64.-A6.A.86.	AeA_LnsL_RnsR	JC-S-S-LR-LR-SM	JC-S-S-LR-LR-SM	SM	LR	LR	LR	SM	SM	LR	SM	SM	(3,2)	4					3.5(1.5)--pm(>>,forward)				1.0(0.7)--pm(<<,backward)
4v88.cif1	82	A6.A.168.|A6.G.63.-A6.C.87.	A6.A.169.|A6.G.63.-A6.C.87.	AnsA_LeL_ReR	JC-S-S-LR-LR-SM	JC-S-S-LR-LR-SM	SM	LR	LR	LR	SM	SM	LR	SM	SM	(3,2)	4	3.3(2.2)--pm(>>,forward)
4v88.cif1	82	A6.A.168.|A6.U.64.-A6.A.86.	A6.A.169.|A6.G.63.-A6.C.87.	AnsA_LnsL_RnsR	JC-S-S-LR-LR-SM	JC-S-S-LR-LR-SM	SM	LR	LR	LR	SM	SM	LR	SM	SM	(3,2)	4	3.3(2.2)--pm(>>,forward)				3.5(1.5)--pm(<<,backward)				1.0(0.7)--pm(>>,forward)
4v88.cif1	84	A6.A.445.|A6.C.442.-A6.G.462.	A6.A.445.|A6.C.443.-A6.G.461.	AeA_LnL_RnsR	IC-S-S-LC-LC-SM	IC-S-S-LC-LC-SM	SM	LC	LC	LC	SM	SM	LC	SM	SM	(4,3)	4									4.1(2.9)--pm(<<,backward)
4v88.cif1	84	A6.A.445.|A6.C.442.-A6.G.462.	A6.A.446.|A6.C.443.-A6.G.461.	AnsA_LnL_RnsR	IC-S-S-LC-LC-SM	IC-S-S-LC-LC-SM	SM	LC	LC	LC	SM	SM	LC	SM	SM	(4,3)	4	0.8(0.8)--pm(>>,forward)								4.1(2.9)--pm(<<,backward)
4v88.cif1	84	A6.A.445.|A6.C.442.-A6.G.462.	A6.A.525.|A6.C.442.-A6.G.462.	LeL_ReR	IC-S-S-LC-LC-SM	JCJP-S-S-LC-LC-SM	LR	LC	LC	LC	SM	SM	LC	SM	SM	(4,3)	4
4v88.cif1	84	A6.A.445.|A6.C.442.-A6.G.462.	A6.A.526.|A6.A.441.-A6.U.463.	LnsL_RnsR	IC-S-S-LC-LC-SM	JCJP-S-S-LC-LC-SM	LR	LC	LC	LC	SM	SM	LC	SM	SM	(4,3)	4					1.1(0.8)--pm(<<,backward)				4.2(1.9)--pm(>>,forward)
4v88.cif1	84	A6.A.445.|A6.C.443.-A6.G.461.	A6.A.446.|A6.C.443.-A6.G.461.	AnsA_LeL_ReR	IC-S-S-LC-LC-SM	IC-S-S-LC-LC-SM	SM	LC	LC	LC	SM	SM	LC	SM	SM	(4,3)	4	0.8(0.8)--pm(>>,forward)
4v88.cif1	84	A6.A.445.|A6.C.443.-A6.G.461.	A6.A.525.|A6.C.442.-A6.G.462.	LnL_RnsR	IC-S-S-LC-LC-SM	JCJP-S-S-LC-LC-SM	LR	LC	LC	LC	SM	SM	LC	SM	SM	(4,3)	4									4.1(2.9)--pm(>>,forward)
4v88.cif1	84	A6.A.446.|A6.C.443.-A6.G.461.	A6.A.525.|A6.C.442.-A6.G.462.	LnL_RnsR	IC-S-S-LC-LC-SM	JCJP-S-S-LC-LC-SM	LR	LC	LC	LC	SM	SM	LC	SM	SM	(4,3)	4									4.1(2.9)--pm(>>,forward)
4v88.cif1	84	A6.A.525.|A6.C.442.-A6.G.462.	A6.A.526.|A6.A.441.-A6.U.463.	AnsA_LnsL_RnsR	JCJP-S-S-LC-LC-SM	JCJP-S-S-LC-LC-SM	SM	LC	LC	LC	SM	SM	LC	SM	SM	(4,3)	4	5.4(3.8)--pm(>>,forward)				1.1(0.8)--pm(<<,backward)				4.2(1.9)--pm(>>,forward)
4v88.cif1	85	A6.A.555.|A6.G.548.-A6.C.590.	A6.A.556.|A6.G.549.-A6.C.589.	AnsA_LnsL_RnR	HP-S-S-LR-LR-SM	HP-S-S-LR-LR-SM	SM	LR	LR	LR	SM	SM	LR	SM	SM	(2,2)	3	5.8(3.5)--pm(>>,forward)				4.8(3.0)--pm(>>,forward)
4v88.cif1	86	A6.A.619.|A6.C.14.-A6.G.1140.	A6.A.1086.|A6.C.13.-A6.G.1141.	AsA_LnsL_RnsR	JP-S-S-LR-LR-SM	HPJP-S-S-LR-LR-SM	SM	LR	LR	LR	SM	SM	LR	SM	SM	(2,2)	4	1.7(0.4)--mm(<>,outward)				0.7(0.2)--pm(<<,backward)				1.5(0.2)--pm(>>,forward)
4v88.cif1	87	A6.A.620.|A6.C.614.-A6.G.1107.	A6.A.621.|A6.A.615.-A6.U.1106.	AnsA_LnsL_RnR_RsL	JP-S-S-LC-LC-SM	JP-S-S-LC-LC-SM	SM	LC	LC	LC	SM	SM	LC	SM	SM	(2,2)	3	5.1(2.8)--pm(>>,forward)				0.3(0.1)--pm(>>,forward)			2.2(1.2)--mm(<>,outward)
4v88.cif1	88	A6.A.769.|A6.C.36.-A6.U.472.	A6.A.770.|A6.U.37.-A6.A.471.	AnsA_LnsL_RnsR	HC-JC-JCJP-LR-LR-SM	HC-JC-JCJP-LR-LR-SM	SM	LR	LR	LR	SM	SM	LR	SM	SM	(2,2)	3	1.6(1.3)--pm(>>,forward)				0.7(0.1)--pm(>>,forward)				0.9(0.7)--pm(<<,backward)
4v88.cif1	89	A6.A.804.|A6.C.747.-A6.G.802.	A6.A.804.|A6.C.747.-A6.A.803.	AeA_AnR_LeL_RnsR	BC-S-S-LC-LC-SM	BC-S-BC-LC-SM-LC	SM	LC	SM	LC	SM	LC	LC	SM	LC	(1,2)	3									6.7(4.7)--pm(>>,forward)
4v88.cif1	90	A6.A.906.|A6.G.997.-A6.C.1007.	A6.A.907.|A6.U.996.-A6.G.1008.	AnsA_LnL_LsR_RnR	HC-S-S-LR-LR-SM	HC-S-S-LR-LR-SM	SM	LR	LR	LR	SM	SM	LR	SM	SM	(2,2)	3	6.0(4.3)--pm(>>,forward)					7.5(4.4)--mm(<>,outward)
4v88.cif1	91	A6.A.939.|A6.G.624.-A6.C.975.	A6.A.939.|A6.C.625.-A6.A.974.	AeA_LnsL_RnsR	HC-JP-JP-LR-LR-SM	HC-JP-JP-LR-LR-SM	SM	LR	LR	LR	SM	SM	LR	SM	SM	(2,2)	3					7.0(4.0)--pm(>>,forward)				6.0(4.0)--pm(<<,backward)
4v88.cif1	91	A6.A.939.|A6.G.624.-A6.C.975.	A6.A.940.|A6.G.624.-A6.C.975.	AnsA_LeL_ReR	HC-JP-JP-LR-LR-SM	HC-JP-JP-LR-LR-SM	SM	LR	LR	LR	SM	SM	LR	SM	SM	(2,2)	3	4.9(3.5)--pm(>>,forward)
4v88.cif1	91	A6.A.939.|A6.C.625.-A6.A.974.	A6.A.940.|A6.G.624.-A6.C.975.	AnsA_LnsL_RnsR	HC-JP-JP-LR-LR-SM	HC-JP-JP-LR-LR-SM	SM	LR	LR	LR	SM	SM	LR	SM	SM	(2,2)	3	4.9(3.5)--pm(>>,forward)				7.0(4.0)--pm(<<,backward)				6.0(4.0)--pm(>>,forward)
4v88.cif1	92	A6.A.977.|A6.C.1773.-A6.G.1788.	A6.A.978.|A6.G.1774.-A6.C.1787.	AnsA_LnL_RnsR_RsL	JP-S-S-LR-LR-SM	JP-S-S-LR-LR-SM	SM	LR	LR	LR	SM	SM	LR	SM	SM	(2,2)	3	4.1(1.7)--pm(>>,forward)							3.0(0.6)--mm(<>,outward)	1.5(0.3)--pm(<<,backward)
4v88.cif1	93	A6.A.1183.|A6.C.1210.-A6.G.1453.	A6.A.1184.|A6.C.1209.-A6.G.1454.	AnsA_LnL_RnsR	JC-S-S-LC-LC-SM	JC-S-S-LC-LC-SM	SM	LC	LC	LC	SM	SM	LC	SM	SM	(2,2)	3	7.0(5.0)--pm(>>,forward)								3.5(1.9)--pm(>>,forward)
4v88.cif1	94	A6.A.1400.|A6.G.1308.-A6.C.1317.	A6.A.1401.|A6.C.1309.-A6.G.1316.	AnsA_LnsL_RnsR	HC-S-S-LR-LR-SM	HC-S-S-LR-LR-SM	SM	LR	LR	LR	SM	SM	LR	SM	SM	(2,2)	3	7.3(5.5)--pm(>>,forward)				7.0(3.9)--pm(>>,forward)				4.6(2.0)--pm(<<,backward)
4v88.cif1	95	A6.A.1524.|A6.C.1589.-A6.G.1607.	A6.A.1525.|A6.C.1589.-A6.G.1607.	AnsA_LeL_ReR	IC-S-S-LR-LR-SM	IC-S-S-LR-LR-SM	SM	LR	LR	LR	SM	SM	LR	SM	SM	(3,2)	5	5.3(3.7)--pm(>>,forward)
4v88.cif1	95	A6.A.1524.|A6.C.1589.-A6.G.1607.	A6.A.1526.|A6.G.1588.-A6.U.1608.	LnsL_RnsR	IC-S-S-LR-LR-SM	IC-JC-JC-LR-LR-SM	SM	LR	LR	LR	LC	LC	LR	LC	LC	(3,2)	5					6.3(2.8)--pm(<<,backward)				4.1(1.6)--pm(>>,forward)
4v88.cif1	95	A6.A.1525.|A6.C.1589.-A6.G.1607.	A6.A.1526.|A6.G.1588.-A6.U.1608.	AnsA_LnsL_RnsR	IC-S-S-LR-LR-SM	IC-JC-JC-LR-LR-SM	SM	LR	LR	LR	LC	LC	LR	LC	LC	(3,2)	5	4.9(3.9)--pm(>>,forward)				6.3(2.8)--pm(<<,backward)				4.1(1.6)--pm(>>,forward)
4v88.cif1	96	A6.A.1655.|A5.A.2291.-A5.U.2301.	A6.A.1746.|A5.C.2290.-A5.G.2302.	AsA_LnL_LsR_RnR	IC-S-S-LR-LR-SM	IC-S-S-LR-LR-SM	SM	LR	LR	LR	SM	SM	LR	SM	SM	(2,2)	4	4.4(2.7)--mm(<>,outward)					3.0(1.7)--mm(<>,outward)
4v88.cif1	97	A5.A.846.|A6.C.627.-A6.G.972.	A5.A.847.|A6.C.627.-A6.G.972.	AnsA_LeL_ReR	HC-S-S-LR-LR-SM	HC-S-S-LR-LR-SM	SM	LR	LR	LR	SM	SM	LR	SM	SM	(2,1)	3	6.2(3.7)--pm(>>,forward)
4v8b.cif1	98	AA.A.1492.|AB.A.36.-A1.U.20.	AA.A.1493.|AB.G.37.-A1.U.19.	AnsA_LnsL_RnR	IC-S-S-LR-LR-SM	IC-HPJP-JP-LR-LR-SM	SM	LR	LR	LR	LC	LC	LR	LC	LC	(2,2)	5	4.7(2.1)--pm(>>,forward)				4.1(1.3)--pm(>>,forward)
4v9f.cif1	99	0.A.11.|0.A.2085.-0.U.2659.	0.A.532.|0.C.2084.-0.G.2660.	AsA_LnL_LsR_RnR	II-S-S-LR-LR-SM	JP-S-S-LC-LC-SM	LR	LR	LR	LC	SM	SM	LC	SM	SM	(2,2)	4	5.5(3.7)--mm(<>,outward)					3.9(1.4)--mm(<>,outward)
4v9f.cif1	100	0.A.67.|0.C.53.-0.G.66.	0.A.69.|0.G.54.-0.C.65.	AsA_LnsL_RnR_RsL	HP-S-S-LC-LC-SM	HP-S-S-LC-LC-SM	SM	LC	LC	LC	SM	SM	LC	SM	SM	(2,2)	3	1.3(0.6)--pm(>>,forward)				0.6(0.2)--pm(>>,forward)			3.2(0.8)--mm(<>,outward)
4v9f.cif1	101	0.A.151.|0.G.41.-0.C.440.	0.A.152.|0.G.41.-0.C.440.	AnsA_LeL_ReR	JC-JC-JCJP-SM-SM-SM	JC-JC-JCJP-SM-SM-SM	SM	SM	SM	SM	SM	SM	SM	SM	SM	(4,3)	4	6.9(5.0)--pm(>>,forward)
4v9f.cif1	101	0.A.151.|0.G.41.-0.C.440.	0.A.439.|0.C.153.-0.G.184.	RnsA	JC-JC-JCJP-SM-SM-SM	JCJP-JC-JC-SM-SM-SM	SM	SM	SM	SM	SM	SM	SM	SM	SM	(4,3)	4							5.7(4.6)--pm(<<,backward)
4v9f.cif1	101	0.A.151.|0.G.41.-0.C.440.	0.A.442.|0.C.40.-0.A.441.	AsA_LnsL_RnsR	JC-JC-JCJP-SM-SM-SM	JCJP-JC-JCJP-SM-SM-SM	SM	SM	SM	SM	SM	SM	SM	SM	SM	(4,3)	4	2.5(0.9)--mm(<>,outward)				1.4(0.2)--pm(<<,backward)				6.7(2.4)--pm(>>,forward)
4v9f.cif1	101	0.A.152.|0.G.41.-0.C.440.	0.A.439.|0.C.153.-0.G.184.	AnsL_RnsA	JC-JC-JCJP-SM-SM-SM	JCJP-JC-JC-SM-SM-SM	SM	SM	SM	SM	SM	SM	SM	SM	SM	(4,3)	4		5.6(4.4)--pm(>>,forward)					5.7(4.6)--pm(<<,backward)
4v9f.cif1	101	0.A.152.|0.G.41.-0.C.440.	0.A.442.|0.C.40.-0.A.441.	LnsL_RnsR	JC-JC-JCJP-SM-SM-SM	JCJP-JC-JCJP-SM-SM-SM	SM	SM	SM	SM	SM	SM	SM	SM	SM	(4,3)	4					1.4(0.2)--pm(<<,backward)				6.7(2.4)--pm(>>,forward)
4v9f.cif1	102	0.A.160.|0.C.769.-0.G.892.	0.A.161.|0.C.769.-0.G.892.	AnsA_LeL_ReR	HC-S-S-LR-LR-SM	HC-S-S-LR-LR-SM	SM	LR	LR	LR	SM	SM	LR	SM	SM	(2,1)	3	6.6(4.6)--pm(>>,forward)
4v9f.cif1	103	0.A.169.|0.C.2119.-0.G.2275.	0.A.2469.|0.A.2118.-0.U.2276.	AsA_LnsL_RnsR	HC-S-S-LR-LR-SM	JI-S-S-LC-LC-SM	LR	LR	LR	LC	SM	SM	LC	SM	SM	(2,2)	4	2.1(0.3)--mm(<>,outward)				2.5(1.3)--pm(<<,backward)				6.6(2.3)--pm(>>,forward)
4v9f.cif1	104	0.A.193.|0.G.413.-0.C.427.	0.A.408.|0.C.412.-0.G.428.	LnL_LsR_RnR	JC-S-S-LR-LR-SM	JC-S-S-LC-LC-SM	LR	LR	LR	LC	SM	SM	LC	SM	SM	(2,2)	4						4.2(1.5)--mm(<>,outward)
4v9f.cif1	105	0.A.242.|0.G.273.-0.C.377.	0.A.243.|0.G.274.-0.C.376.	AnsA_LnsL_RnR	JC-S-S-LC-LC-SM	JC-S-S-LC-LC-SM	SM	LC	LC	LC	SM	SM	LC	SM	SM	(2,2)	3	7.2(5.3)--pm(>>,forward)				4.6(3.3)--pm(>>,forward)
4v9f.cif1	106	0.A.305.|0.G.326.-0.C.330.	0.A.306.|0.U.325.-0.A.340.	AnsA_LnL_LsR_RsR	JI-HP-HP-LR-LR-SM	JI-S-S-LC-LC-SM	SM	LC	LC	LR	LC	LC	LR	LC	LC	(2,2)	4	7.6(5.5)--pm(>>,forward)					2.8(1.5)--mm(<>,outward)			0.3(0.1)--pm(>>,forward)
4v9f.cif1	107	0.A.520.|0.C.638.-0.G.1363.	0.A.521.|0.C.637.-0.G.1364.	AnsA_LnL_RnsR	JCJP-S-S-LC-LC-SM	JCJP-S-S-LC-LC-SM	SM	LC	LC	LC	SM	SM	LC	SM	SM	(2,2)	3	6.5(4.8)--pm(>>,forward)								4.8(3.6)--pm(>>,forward)
4v9f.cif1	108	0.A.551.|0.G.1322.-0.C.1335.	0.A.552.|0.G.1323.-0.C.1334.	AnsA_LnsL_RnR	IC-S-S-LR-LR-SM	IC-S-S-LR-LR-SM	SM	LR	LR	LR	SM	SM	LR	SM	SM	(2,2)	3	6.5(4.4)--pm(>>,forward)				4.7(2.7)--pm(>>,forward)
4v9f.cif1	109	0.A.565.|0.A.1092.-0.U.1264.	0.A.566.|0.G.1093.-0.C.1263.	AnsA_LnsL_RnsR	IC-S-S-LR-LR-SM	IC-S-S-LR-LR-SM	SM	LR	LR	LR	SM	SM	LR	SM	SM	(2,2)	3	6.5(4.7)--pm(>>,forward)				0.8(0.8)--pm(>>,forward)				3.1(1.3)--pm(<<,backward)
4v9f.cif1	110	0.A.643.|0.C.762.-0.G.902.	0.A.1358.|0.C.763.-0.G.901.	LnL_RnsR	JC-S-S-LC-LC-SM	JC-S-S-LC-LC-SM	SM	LC	LC	LC	SM	SM	LC	SM	SM	(2,2)	4									4.4(2.9)--pm(<<,backward)
4v9f.cif1	111	0.A.665.|0.C.208.-0.G.231.	0.A.666.|0.C.208.-0.G.231.	AnsA_LeL_ReR	IC-S-S-LR-LR-SM	IC-S-S-LR-LR-SM	SM	LR	LR	LR	SM	SM	LR	SM	SM	(3,2)	4	6.5(4.6)--pm(>>,forward)
4v9f.cif1	111	0.A.665.|0.C.208.-0.G.231.	0.A.682.|0.G.209.-0.C.230.	AsA_LnsL_RnR_RsL	IC-S-S-LR-LR-SM	IC-S-S-LR-LR-SM	SM	LR	LR	LR	SM	SM	LR	SM	SM	(3,2)	4	7.3(4.5)--mm(<>,outward)				0.4(0.1)--pm(>>,forward)			4.4(1.8)--mm(<>,outward)
4v9f.cif1	111	0.A.666.|0.C.208.-0.G.231.	0.A.682.|0.G.209.-0.C.230.	LnsL_RnR_RsL	IC-S-S-LR-LR-SM	IC-S-S-LR-LR-SM	SM	LR	LR	LR	SM	SM	LR	SM	SM	(3,2)	4					0.4(0.1)--pm(>>,forward)			4.4(1.8)--mm(<>,outward)
4v9f.cif1	112	0.A.736.|0.A.2382.-0.U.2406.	0.A.737.|0.G.2383.-0.C.2405.	AnsA_LnsL_RnR	HC-S-S-LR-LR-SM	HC-S-S-LR-LR-SM	SM	LR	LR	LR	SM	SM	LR	SM	SM	(2,2)	3	7.7(5.4)--pm(>>,forward)				2.6(2.5)--pm(>>,forward)
4v9f.cif1	113	0.A.766.|0.A.2108.-0.U.2478.	0.A.767.|0.G.2110.-0.C.2477.	AnsA_LsL_RnR	IC-S-S-LR-LR-SM	IC-S-S-LR-LR-SM	SM	LR	LR	LR	LR	LR	LR	LR	LR	(2,2)	5	6.2(4.3)--pm(>>,forward)				2.0(1.6)--pm(>>,forward)
4v9f.cif1	114	0.A.776.|0.G.871.-0.C.879.	0.A.867.|0.G.870.-0.C.880.	AsA_LnsL_RnR	JC-S-S-LC-LC-SM	JC-S-S-LC-LC-SM	SM	LC	LC	LC	SM	SM	LC	SM	SM	(2,2)	4	0.6(0.3)--mm(<>,outward)				3.5(2.0)--pm(<<,backward)
4v9f.cif1	115	0.A.943.|0.G.941.-0.C.1025.	0.A.943.|0.U.942.-0.G.1024.	AeA_AnL_LnsL_RnsR	BC-S-S-LC-LC-SM	BC-S-S-LC-LC-SM	SM	LC	LC	LC	SM	SM	LC	SM	SM	(2,3)	4					5.9(3.6)--pm(>>,forward)				7.2(4.3)--pm(<<,backward)
4v9f.cif1	115	0.A.943.|0.G.941.-0.C.1025.	0.A.1032.|0.G.940.-0.U.1026.	LnsL_RnsR	BC-S-S-LC-LC-SM	IC-S-S-LC-LC-SM	LR	LC	LC	LC	SM	SM	LC	SM	SM	(2,3)	4					4.1(2.5)--pm(<<,backward)				3.1(1.3)--pm(>>,forward)
4v9f.cif1	116	0.A.1006.|0.C.2298.-0.G.2310.	0.A.1007.|0.U.2297.-0.A.2311.	AnsA_LnsL_RnsR	IC-S-S-LR-LR-SM	IC-S-S-LR-LR-SM	SM	LR	LR	LR	SM	SM	LR	SM	SM	(2,2)	3	3.7(2.3)--pm(>>,forward)				1.0(0.4)--pm(<<,backward)				1.9(0.5)--pm(>>,forward)
4v9f.cif1	117	0.A.1057.|0.U.2492.-0.G.2529.	0.A.1058.|0.G.2491.-0.C.2530.	AnsA_LnsL_RnsR	HC-S-S-LR-LR-SM	HC-S-S-LR-LR-SM	SM	LR	LR	LR	SM	SM	LR	SM	SM	(2,2)	3	5.9(4.3)--pm(>>,forward)				7.5(4.4)--pm(<<,backward)				7.0(3.5)--pm(>>,forward)
4v9f.cif1	118	0.A.1078.|0.A.2067.-0.U.2078.	0.A.1079.|0.G.2068.-0.C.2077.	AnsA_LnsL_RnR	HC-S-S-LR-LR-SM	HC-S-S-LR-LR-SM	SM	LR	LR	LR	SM	SM	LR	SM	SM	(2,2)	3	6.9(4.9)--pm(>>,forward)				4.4(3.2)--pm(>>,forward)
4v9f.cif1	119	0.A.1081.|0.G.1045.-0.C.1069.	0.A.1082.|0.G.1046.-0.C.1068.	AnsA_LnsL_RnR	HC-S-S-LR-LR-SM	HC-S-S-LR-LR-SM	SM	LR	LR	LR	SM	SM	LR	SM	SM	(2,2)	3	6.5(4.3)--pm(>>,forward)				4.1(2.5)--pm(>>,forward)
4v9f.cif1	120	0.A.1097.|0.G.1074.-0.C.1085.	0.A.1098.|0.G.1075.-0.C.1084.	AnsA_LnsL_RnsR	IC-S-S-LR-LR-SM	IC-S-S-LR-LR-SM	SM	LR	LR	LR	SM	SM	LR	SM	SM	(5,5)	7	6.4(4.6)--pm(>>,forward)				2.3(0.9)--pm(>>,forward)				0.3(0.1)--pm(<<,backward)
4v9f.cif1	120	0.A.1098.|0.G.1075.-0.C.1084.	0.A.1106.|0.G.1099.-0.C.1257.	AnsL	IC-S-S-LR-LR-SM	IP-S-S-LR-LR-SM	LR	LC	LC	LR	LR	LR	LR	LR	LR	(5,5)	7		1.8(0.5)--pm(>>,forward)
4v9f.cif1	120	0.A.1098.|0.G.1075.-0.C.1084.	0.A.1124.|0.G.1076.-0.C.1083.	LnsL_RnR	IC-S-S-LR-LR-SM	IP-S-S-LR-LR-SM	LR	LR	LR	LR	SM	SM	LR	SM	SM	(5,5)	7					3.4(1.6)--pm(>>,forward)
4v9f.cif1	120	0.A.1106.|0.G.1099.-0.C.1257.	0.A.1107.|0.G.1100.-0.C.1256.	AnsA_LnsL_RnR	IP-S-S-LR-LR-SM	IP-S-S-LR-LR-SM	SM	LR	LR	LR	SM	SM	LR	SM	SM	(5,5)	7	6.4(4.1)--pm(>>,forward)				4.3(2.5)--pm(>>,forward)
4v9f.cif1	121	0.A.1132.|0.U.2499.-0.A.2521.	0.A.1133.|0.C.2500.-0.G.2520.	AnsA_LnL_RnsR	IP-S-S-LR-LR-SM	IP-S-S-LR-LR-SM	SM	LR	LR	LR	SM	SM	LR	SM	SM	(3,3)	4	1.6(0.9)--pm(>>,forward)								2.9(1.3)--pm(<<,backward)
4v9f.cif1	121	0.A.1132.|0.U.2499.-0.A.2521.	0.A.1231.|0.C.2498.-0.G.2522.	LnL_RnsR	IP-S-S-LR-LR-SM	IP-S-S-LR-LR-SM	SM	LR	LR	LR	SM	SM	LR	SM	SM	(3,3)	4									2.8(1.4)--pm(>>,forward)
4v9f.cif1	122	0.A.1188.|0.G.1158.-0.C.1209.	0.A.1189.|0.G.1159.-0.C.1208.	AnsA_LnsL_RnR	JC-S-S-LC-LC-SM	JC-S-S-LC-LC-SM	SM	LC	LC	LC	SM	SM	LC	SM	SM	(2,2)	3	8.0(6.2)--pm(>>,forward)				3.8(2.2)--pm(>>,forward)
4v9f.cif1	123	0.A.1232.|0.C.2551.-0.G.2603.	0.A.1233.|0.U.2550.-0.A.2604.	AnsA_LnL_RnsR	IP-S-S-LR-LR-SM	IP-S-S-LR-LR-SM	SM	LR	LR	LR	SM	SM	LR	SM	SM	(2,2)	3	5.2(2.5)--pm(>>,forward)								3.9(2.2)--pm(>>,forward)
4v9f.cif1	124	0.A.1458.|0.A.784.-0.U.862.	0.A.1459.|0.C.783.-0.G.863.	AnsA_LnL_LsR_RnR	IC-S-S-LR-LR-SM	IC-S-S-LR-LR-SM	SM	LR	LR	LR	SM	SM	LR	SM	SM	(2,2)	3	4.8(2.9)--pm(>>,forward)					4.0(1.9)--mm(<>,outward)
4v9f.cif1	125	0.A.1476.|0.C.1467.-0.G.1475.	0.A.1865.|0.G.1468.-0.C.1474.	LnL_RnR_RsL	IC-S-S-LC-LC-SM	HC-S-S-LR-LR-SM	LR	LC	LC	LR	SM	SM	LR	SM	SM	(3,2)	4								5.2(2.4)--mm(<>,outward)
4v9f.cif1	125	0.A.1476.|0.C.1467.-0.G.1475.	0.A.1866.|0.C.1467.-0.G.1475.	AnR_AsA_LeL_ReR	IC-S-S-LC-LC-SM	HC-S-S-LR-LR-SM	LR	LC	LC	LR	SM	SM	LR	SM	SM	(3,2)	4	0.1(0.1)--mp(<<,backward)
4v9f.cif1	126	0.A.1492.|0.C.1514.-0.G.1672.	0.A.1493.|0.G.1449.-0.C.1513.	AnsA_LnR_RsL	JP-S-S-LC-LC-SM	JP-S-S-LC-LC-SM	SM	LC	LC	LC	LR	LR	LC	LR	LR	(2,2)	5	5.2(3.4)--pm(>>,forward)							4.2(1.4)--mp(>>,forward)
4v9f.cif1	127	0.A.1501.|0.C.1421.-0.G.1443.	0.A.1502.|0.C.1420.-0.G.1444.	AnsA_LnL_RnsR	HC-S-S-LR-LR-SM	HC-S-S-LR-LR-SM	SM	LR	LR	LR	SM	SM	LR	SM	SM	(2,2)	3	7.8(5.7)--pm(>>,forward)								4.2(2.7)--pm(>>,forward)
4v9f.cif1	128	0.A.1572.|0.C.1495.-0.G.1510.	0.A.1573.|0.A.1494.-0.U.1511.	AnsA_LnsL_RnsR	JCJP-S-S-LR-LR-SM	JCJP-S-S-LR-LR-SM	SM	LR	LR	LR	SM	SM	LR	SM	SM	(2,2)	3	2.1(1.3)--pm(>>,forward)				2.3(0.9)--pm(<<,backward)				7.4(4.0)--pm(>>,forward)
4v9f.cif1	129	0.A.1597.|0.C.1538.-0.G.1647.	0.A.1598.|0.C.1538.-0.G.1647.	AnsA_LeL_ReR	HC-S-S-LR-LR-SM	HC-S-S-LR-LR-SM	SM	LR	LR	LR	SM	SM	LR	SM	SM	(2,1)	3	5.3(2.8)--pm(>>,forward)
4v9f.cif1	130	0.A.1615.|0.G.1541.-0.C.1644.	0.A.1616.|0.G.1542.-0.C.1643.	AnsA_LnsL_RnR	IC-S-S-LR-LR-SM	IC-S-S-LR-LR-SM	SM	LR	LR	LR	SM	SM	LR	SM	SM	(2,2)	3	6.2(4.4)--pm(>>,forward)				3.2(1.6)--pm(>>,forward)
4v9f.cif1	131	0.A.1631.|0.C.1554.-0.G.1567.	0.A.1632.|0.C.1553.-0.G.1568.	AnsA_LnL_RnsR	JCJP-S-S-LC-LC-SM	JCJP-S-S-LC-LC-SM	SM	LC	LC	LC	SM	SM	LC	SM	SM	(2,2)	3	6.5(5.1)--pm(>>,forward)								3.9(2.5)--pm(>>,forward)
4v9f.cif1	132	0.A.1657.|0.C.1456.-0.G.1489.	0.A.1658.|0.C.1456.-0.G.1489.	AnsA_LeL_ReR	ICJP-S-S-LR-LR-SM	ICJP-S-S-LR-LR-SM	SM	LR	LR	LR	SM	SM	LR	SM	SM	(3,2)	3	5.5(3.9)--pm(>>,forward)
4v9f.cif1	132	0.A.1657.|0.C.1456.-0.G.1489.	0.A.1659.|0.C.1455.-0.G.1490.	LnsL_RnsR	ICJP-S-S-LR-LR-SM	ICJP-S-S-LR-LR-SM	SM	LR	LR	LR	SM	SM	LR	SM	SM	(3,2)	3					0.2(0.1)--pm(<<,backward)				3.1(1.6)--pm(>>,forward)
4v9f.cif1	132	0.A.1658.|0.C.1456.-0.G.1489.	0.A.1659.|0.C.1455.-0.G.1490.	AnsA_LnsL_RnsR	ICJP-S-S-LR-LR-SM	ICJP-S-S-LR-LR-SM	SM	LR	LR	LR	SM	SM	LR	SM	SM	(3,2)	3	2.3(2.0)--pm(>>,forward)				0.2(0.1)--pm(<<,backward)				3.1(1.6)--pm(>>,forward)
4v9f.cif1	133	0.A.1858.|0.C.1854.-0.G.1877.	0.A.1859.|0.C.1853.-0.G.1878.	AnsA_LnsL_RnsR	IC-S-S-LC-LC-SM	IC-S-S-LC-LC-SM	SM	LC	LC	LC	SM	SM	LC	SM	SM	(2,2)	3	4.5(3.5)--pm(>>,forward)				2.4(0.9)--pm(<<,backward)				4.4(2.9)--pm(>>,forward)
4v9f.cif1	125	0.A.1865.|0.G.1468.-0.C.1474.	0.A.1866.|0.C.1467.-0.G.1475.	AnsA_LnL_LsR_RnR	HC-S-S-LR-LR-SM	HC-S-S-LR-LR-SM	SM	LR	LR	LR	SM	SM	LR	SM	SM	(3,2)	4	6.6(4.9)--pm(>>,forward)					5.2(2.4)--mm(<>,outward)
4v9f.cif1	134	0.A.1909.|0.U.2127.-0.A.2266.	0.A.1910.|0.G.2128.-0.U.2265.	AnsA_LnL_RnR_RsL	IC-S-S-LR-LR-SM	IC-S-S-LR-LR-SM	SM	LR	LR	LR	SM	SM	LR	SM	SM	(4,3)	4	6.3(4.5)--pm(>>,forward)							2.4(1.2)--mm(<>,outward)
4v9f.cif1	134	0.A.1909.|0.U.2127.-0.A.2266.	0.A.1930.|0.U.2127.-0.A.2266.	AsA_LeL_ReR	IC-S-S-LR-LR-SM	IC-S-S-LR-LR-SM	SM	LR	LR	LR	SM	SM	LR	SM	SM	(4,3)	4	3.8(1.2)--mm(<>,outward)
4v9f.cif1	134	0.A.1909.|0.U.2127.-0.A.2266.	0.A.1931.|0.C.2126.-0.G.2267.	LnsL_RnsR	IC-S-S-LR-LR-SM	IC-S-S-LR-LR-SM	SM	LR	LR	LR	SM	SM	LR	SM	SM	(4,3)	4					2.7(1.1)--pm(<<,backward)				0.8(0.8)--pm(>>,forward)
4v9f.cif1	134	0.A.1910.|0.G.2128.-0.U.2265.	0.A.1930.|0.U.2127.-0.A.2266.	LnL_LsR_RnR	IC-S-S-LR-LR-SM	IC-S-S-LR-LR-SM	SM	LR	LR	LR	SM	SM	LR	SM	SM	(4,3)	4						2.4(1.2)--mm(<>,outward)
4v9f.cif1	135	0.A.1921.|0.C.418.-0.G.2449.	0.A.1922.|0.C.418.-0.G.2449.	AnsA_LeL_ReR	HC-S-S-LR-LR-SM	HC-S-S-LR-LR-SM	SM	LR	LR	LR	SM	SM	LR	SM	SM	(2,1)	3	5.7(3.9)--pm(>>,forward)
4v9f.cif1	134	0.A.1930.|0.U.2127.-0.A.2266.	0.A.1931.|0.C.2126.-0.G.2267.	AnsA_LnsL_RnsR	IC-S-S-LR-LR-SM	IC-S-S-LR-LR-SM	SM	LR	LR	LR	SM	SM	LR	SM	SM	(4,3)	4	6.6(4.7)--pm(>>,forward)				2.7(1.1)--pm(<<,backward)				0.8(0.8)--pm(>>,forward)
4v9f.cif1	136	0.A.1941.|0.G.1849.-0.C.1882.	0.A.2011.|0.G.1849.-0.C.1882.	AsA_LeL_ReR	BC-S-S-LR-LR-SM	JC-S-S-LR-LR-SM	LR	LR	LR	LR	SM	SM	LR	SM	SM	(3,2)	6	2.1(2.0)--mp(<<,backward)
4v9f.cif1	137	0.A.1968.|0.C.1893.-0.G.1944.	0.A.1969.|0.C.1892.-0.G.1945.	AnsA_LnL_RnsR	JC-S-S-LC-LC-SM	JC-S-S-LC-LC-SM	SM	LC	LC	LC	SM	SM	LC	SM	SM	(2,2)	3	6.2(4.4)--pm(>>,forward)								2.6(1.1)--pm(>>,forward)
4v9f.cif1	136	0.A.2010.|0.C.1889.-0.G.2013.	0.A.2011.|0.G.1849.-0.C.1882.	AnA_RsA	JC-S-S-LC-LC-SM	JC-S-S-LR-LR-SM	SM	LR	LR	LC	LR	LR	LC	LR	LR	(3,2)	6							2.0(0.8)--mm(<>,outward)
4v9f.cif1	138	0.A.2361.|0.G.2295.-0.C.2313.	0.A.2425.|0.C.2294.-0.G.2314.	AsA_LnL_LsR_RnR	HP-S-S-LR-LR-SM	JIJP-S-S-LC-LC-SM	LR	LR	LR	LC	SM	SM	LC	SM	SM	(2,2)	4	2.6(1.1)--mm(<>,outward)					4.8(1.9)--mm(<>,outward)
4v9f.cif1	139	0.A.2394.|0.C.915.-0.G.928.	0.A.2395.|0.A.916.-0.U.927.	AnA_LnL_RnR_RsL	HC-S-S-LR-LR-SM	HC-S-S-LR-LR-SM	SM	LR	LR	LR	SM	SM	LR	SM	SM	(2,2)	3								4.5(2.2)--mm(<>,outward)
4v9f.cif1	140	0.A.2599.|0.C.2556.-0.G.2579.	0.A.2600.|0.C.2555.-0.G.2580.	AnsA_LnL_RnsR	JC-S-S-LC-LC-SM	JC-S-S-LC-LC-SM	SM	LC	LC	LC	SM	SM	LC	SM	SM	(2,2)	3	7.6(5.6)--pm(>>,forward)								4.2(2.8)--pm(>>,forward)
4v9f.cif1	141	0.A.2680.|0.C.2682.-0.G.2712.	0.A.2681.|0.G.2713.-0.C.2767.	AnsA_LnA_RnsL	JCJP-S-S-LC-LC-SM	JCJP-S-S-LC-LC-SM	SM	LC	LC	LC	LR	LR	LC	LR	LR	(2,2)	5	3.1(1.4)--pm(>>,forward)							5.0(3.0)--pm(>>,forward)
4v9f.cif1	142	0.A.2776.|0.C.2559.-0.G.2574.	0.A.2799.|0.G.2558.-0.C.2575.	LnsL_RnsR	IC-S-S-LR-LR-SM	IC-S-S-LR-LR-SM	SM	LR	LR	LR	SM	SM	LR	SM	SM	(2,2)	4					7.5(4.6)--pm(<<,backward)				6.0(3.0)--pm(>>,forward)
4v9f.cif1	143	0.A.2840.|0.C.2088.-0.G.2656.	0.A.2841.|0.C.2087.-0.G.2657.	AnsA_LnL_RnsR	HC-S-S-LR-LR-SM	HC-S-S-LR-LR-SM	SM	LR	LR	LR	SM	SM	LR	SM	SM	(2,2)	3	1.1(0.9)--pm(>>,forward)								3.0(1.4)--pm(>>,forward)
4v9f.cif1	144	0.A.2875.|0.C.1787.-0.G.1805.	0.A.2883.|0.C.1786.-0.G.1806.	AsA_LnsL_RnsR	HC-S-S-LR-LR-SM	HC-S-S-LR-LR-SM	SM	LR	LR	LR	SM	SM	LR	SM	SM	(2,2)	3	2.8(1.3)--mm(<>,outward)				1.6(0.5)--pm(<<,backward)				3.8(2.4)--pm(>>,forward)
4v9f.cif1	145	0.A.2906.|0.C.2833.-0.G.2847.	0.A.2908.|0.C.2832.-0.G.2848.	LnsL_RnsR	JC-S-S-LC-LC-SM	JC-S-S-LC-LC-SM	SM	LC	LC	LC	SM	SM	LC	SM	SM	(2,2)	3					0.9(0.2)--pm(<<,backward)				4.1(2.5)--pm(>>,forward)
4v9f.cif1	146	9.A.52.|9.C.30.-9.G.50.	9.A.56.|9.C.29.-9.G.53.	AnsR_LnsL	BC-S-S-LC-LC-SM	IC-S-S-LC-LC-SM	LR	LC	LC	LR	LR	LR	LR	LR	LR	(3,3)	6			3.6(2.2)--pm(>>,forward)		3.4(0.6)--pm(<<,backward)
4v9f.cif1	146	9.A.56.|9.U.28.-9.A.54.	9.A.56.|9.C.29.-9.G.53.	AeA_LnsL_RnsR	IC-S-S-LC-LC-SM	IC-S-S-LC-LC-SM	SM	LC	LC	LC	SM	SM	LC	SM	SM	(3,3)	6					2.4(0.6)--pm(>>,forward)				3.3(1.8)--pm(<<,backward)
4v9f.cif1	146	9.A.56.|9.U.28.-9.A.54.	9.A.57.|9.U.28.-9.A.54.	AnsA_LeL_ReR	IC-S-S-LC-LC-SM	IC-S-S-LC-LC-SM	SM	LC	LC	LC	SM	SM	LC	SM	SM	(3,3)	6	2.7(2.4)--pm(>>,forward)
4v9f.cif1	146	9.A.56.|9.C.29.-9.G.53.	9.A.57.|9.U.28.-9.A.54.	AnsA_LnsL_RnsR	IC-S-S-LC-LC-SM	IC-S-S-LC-LC-SM	SM	LC	LC	LC	SM	SM	LC	SM	SM	(3,3)	6	2.7(2.4)--pm(>>,forward)				2.4(0.6)--pm(<<,backward)				3.3(1.8)--pm(>>,forward)
4xnr.cif1	147	X.A.33.|X.G.37.-X.C.61.	X.A.65.|X.G.37.-X.C.61.	LeL_ReR	HP-S-S-LC-LC-SM	HP-S-S-LC-LC-SM	LR	LC	LC	LC	SM	SM	LC	SM	SM	(3,2)	4
4xnr.cif1	147	X.A.33.|X.G.37.-X.C.61.	X.A.66.|X.G.38.-X.C.60.	LnsL_RnsR	HP-S-S-LC-LC-SM	HP-S-S-LC-LC-SM	LR	LC	LC	LC	SM	SM	LC	SM	SM	(3,2)	4					6.9(4.7)--pm(>>,forward)				1.2(0.2)--pm(<<,backward)
4xnr.cif1	147	X.A.65.|X.G.37.-X.C.61.	X.A.66.|X.G.38.-X.C.60.	AnsA_LnsL_RnsR	HP-S-S-LC-LC-SM	HP-S-S-LC-LC-SM	SM	LC	LC	LC	SM	SM	LC	SM	SM	(3,2)	4	6.1(4.4)--pm(>>,forward)				6.9(4.7)--pm(>>,forward)				1.2(0.2)--pm(<<,backward)
4y4o.cif1	148	1A.A.1934.|1a.5MC.1407.-1a.G.1494.	1A.A.1935.|1a.A.1408.-1a.A.1492.	AnA_LnL_RsA_RsL	HC-IC-IC-LR-LR-SM	HC-IC-IC-LR-LR-SM	SM	LR	LR	LR	SM	SM	LR	SM	SM	(2,2)	3							3.5(0.9)--mm(<>,outward)	2.9(1.8)--mm(<>,outward)
4y4o.cif1	149	1a.A.51.|1a.G.113.-1a.C.314.	1a.A.51.|1a.U.114.-1a.A.313.	AeA_LnsL_RnsR	JC-S-S-LR-LR-SM	JC-S-S-LR-LR-SM	SM	LR	LR	LR	SM	SM	LR	SM	SM	(3,2)	5					7.1(4.2)--pm(>>,forward)				5.0(3.6)--pm(<<,backward)
4y4o.cif1	149	1a.A.51.|1a.G.113.-1a.C.314.	1a.A.116.|1a.U.114.-1a.A.313.	AsA_LnsL_RnsR	JC-S-S-LR-LR-SM	JC-S-S-LC-LC-SM	LR	LR	LR	LC	SM	SM	LC	SM	SM	(3,2)	5	3.6(0.7)--pm(>>,forward)				7.1(4.2)--pm(>>,forward)				5.0(3.6)--pm(<<,backward)
4y4o.cif1	149	1a.A.51.|1a.G.113.-1a.C.314.	1a.A.353.|1a.G.113.-1a.C.314.	AsA_LeL_ReR	JC-S-S-LR-LR-SM	JC-S-S-LC-LC-SM	LR	LR	LR	LC	SM	SM	LC	SM	SM	(3,2)	5	6.9(5.5)--mm(<>,outward)
4y4o.cif1	149	1a.A.51.|1a.U.114.-1a.A.313.	1a.A.116.|1a.U.114.-1a.A.313.	AsA_LeL_ReR	JC-S-S-LR-LR-SM	JC-S-S-LC-LC-SM	LR	LR	LR	LC	SM	SM	LC	SM	SM	(3,2)	5	3.6(0.7)--pm(>>,forward)
4y4o.cif1	149	1a.A.51.|1a.U.114.-1a.A.313.	1a.A.353.|1a.G.113.-1a.C.314.	AsA_LnsL_RnsR	JC-S-S-LR-LR-SM	JC-S-S-LC-LC-SM	LR	LR	LR	LC	SM	SM	LC	SM	SM	(3,2)	5	6.9(5.5)--mm(<>,outward)				7.1(4.2)--pm(<<,backward)				5.0(3.6)--pm(>>,forward)
4y4o.cif1	149	1a.A.116.|1a.U.114.-1a.A.313.	1a.A.353.|1a.G.113.-1a.C.314.	LnsL_RnsR	JC-S-S-LC-LC-SM	JC-S-S-LC-LC-SM	LR	LC	LC	LC	SM	SM	LC	SM	SM	(3,2)	5					7.1(4.2)--pm(<<,backward)				5.0(3.6)--pm(>>,forward)
4y4o.cif1	150	1a.A.130.|1a.G.128.-1a.C.233.	1a.A.263.|1a.U.129.-1a.G.232.	LnsL_RnsR	BC-S-S-LC-LC-SM	HC-S-S-LR-LR-SM	LR	LC	LC	LR	SM	SM	LR	SM	SM	(3,3)	6					6.8(3.6)--pm(>>,forward)				7.5(4.3)--pm(<<,backward)
4y4o.cif1	151	1a.A.151.|1a.C.67.-1a.G.102.	1a.A.171.|1a.C.67.-1a.G.102.	LeL_ReR	IC-S-S-LR-LR-SM	IC-S-S-LR-LR-SM	SM	LR	LR	LR	SM	SM	LR	SM	SM	(3,2)	4
4y4o.cif1	151	1a.A.151.|1a.C.67.-1a.G.102.	1a.A.172.|1a.G.66.-1a.C.103.	LnsL_RnsR	IC-S-S-LR-LR-SM	IC-S-S-LR-LR-SM	SM	LR	LR	LR	SM	SM	LR	SM	SM	(3,2)	4					2.1(0.7)--pm(<<,backward)				6.0(2.9)--pm(>>,forward)
4y4o.cif1	152	1a.A.160.|1a.C.342.-1a.G.347.	1a.A.161.|1a.C.342.-1a.G.347.	AnsA_LeL_ReR	HC-S-S-LR-LR-SM	HC-S-S-LR-LR-SM	SM	LR	LR	LR	SM	SM	LR	SM	SM	(2,1)	3	6.0(3.7)--pm(>>,forward)
4y4o.cif1	151	1a.A.171.|1a.C.67.-1a.G.102.	1a.A.172.|1a.G.66.-1a.C.103.	AnsA_LnsL_RnsR	IC-S-S-LR-LR-SM	IC-S-S-LR-LR-SM	SM	LR	LR	LR	SM	SM	LR	SM	SM	(3,2)	4	5.6(3.8)--pm(>>,forward)				2.1(0.7)--pm(<<,backward)				6.0(2.9)--pm(>>,forward)
4y4o.cif1	153	1a.A.195.|1a.A.141.-1a.U.222.	1a.A.196.|1a.G.142.-1a.C.221.	AnsA_LnsL_RnR	JC-S-S-LC-LC-SM	JC-S-S-LC-LC-SM	SM	LC	LC	LC	SM	SM	LC	SM	SM	(2,2)	3	4.9(3.7)--pm(>>,forward)				2.0(1.9)--pm(>>,forward)
4y4o.cif1	150	1a.A.262.|1a.C.131.-1a.G.231.	1a.A.263.|1a.U.129.-1a.G.232.	AnsA_RnsR	HC-S-S-LR-LR-SM	HC-S-S-LR-LR-SM	SM	LR	LR	LR	LR	LR	LR	LR	LR	(3,3)	6	5.2(3.6)--pm(>>,forward)								2.7(1.2)--pm(>>,forward)
4y4o.cif1	154	1a.A.373.|1a.C.370.-1a.G.391.	1a.A.374.|1a.G.371.-1a.C.390.	AnsA_LnsL_RnsR_RsL	IC-S-S-LC-LC-SM	IC-S-S-LC-LC-SM	SM	LC	LC	LC	SM	SM	LC	SM	SM	(3,2)	4	1.1(1.1)--pm(>>,forward)				1.3(0.5)--pm(>>,forward)			2.8(0.5)--mm(<>,outward)	1.7(0.4)--pm(<<,backward)
4y4o.cif1	154	1a.A.373.|1a.C.370.-1a.G.391.	1a.A.482.|1a.C.370.-1a.G.391.	AsA_LeL_ReR	IC-S-S-LC-LC-SM	IC-S-S-LR-LR-SM	LR	LC	LC	LR	SM	SM	LR	SM	SM	(3,2)	4	7.0(4.9)--mm(<>,outward)
4y4o.cif1	154	1a.A.374.|1a.G.371.-1a.C.390.	1a.A.482.|1a.C.370.-1a.G.391.	LnsL_LsR_RnsR	IC-S-S-LC-LC-SM	IC-S-S-LR-LR-SM	LR	LC	LC	LR	SM	SM	LR	SM	SM	(3,2)	4					1.3(0.5)--pm(<<,backward)	2.8(0.5)--mm(<>,outward)			1.7(0.4)--pm(>>,forward)
4y4o.cif1	155	1a.A.509.|1a.G.502.-1a.C.543.	1a.A.510.|1a.C.503.-1a.G.542.	AnsA_LnsL_RnsR	HP-S-S-LR-LR-SM	HP-S-S-LR-LR-SM	SM	LR	LR	LR	SM	SM	LR	SM	SM	(2,2)	3	5.6(3.4)--pm(>>,forward)				7.5(4.1)--pm(>>,forward)				4.2(1.9)--pm(<<,backward)
4y4o.cif1	156	1a.A.572.|1a.C.19.-1a.G.916.	1a.A.864.|1a.C.18.-1a.G.917.	AsA_LnsL_RnsR	JP-S-S-LR-LR-SM	HPJP-S-S-LR-LR-SM	SM	LR	LR	LR	SM	SM	LR	SM	SM	(2,2)	4	1.2(0.1)--mm(<>,outward)				1.8(0.8)--pm(<<,backward)				1.8(0.5)--pm(>>,forward)
4y4o.cif1	157	1a.A.573.|1a.G.567.-1a.C.883.	1a.A.574.|1a.G.568.-1a.C.882.	AnsA_LnsL_RnR	JP-S-S-LR-LR-SM	JP-S-S-LR-LR-SM	SM	LR	LR	LR	SM	SM	LR	SM	SM	(2,2)	3	6.0(3.7)--pm(>>,forward)				4.4(1.9)--pm(>>,forward)
4y4o.cif1	158	1a.A.607.|1a.C.291.-1a.G.309.	1a.A.608.|1a.G.292.-1a.C.308.	AnsA_LnL_RnR_RsL	IC-S-S-LR-LR-SM	IC-S-S-LR-LR-SM	SM	LR	LR	LR	SM	SM	LR	SM	SM	(2,2)	3	5.3(3.7)--pm(>>,forward)							5.2(2.5)--mm(<>,outward)
4y4o.cif1	159	1a.A.621.|1a.G.41.-1a.C.401.	1a.A.622.|1a.G.42.-1a.C.400.	AnsA_LnsL_RnsR	HC-S-S-LR-LR-SM	HC-S-S-LR-LR-SM	SM	LR	LR	LR	SM	SM	LR	SM	SM	(2,2)	3	6.7(4.9)--pm(>>,forward)				3.3(1.8)--pm(>>,forward)				2.2(0.9)--pm(<<,backward)
4y4o.cif1	160	1a.A.695.|1a.G.786.-1a.C.796.	1a.A.696.|1a.G.785.-1a.C.797.	AnsA_LnsL_RnR	HC-S-S-LR-LR-SM	HC-S-S-LR-LR-SM	SM	LR	LR	LR	SM	SM	LR	SM	SM	(2,2)	3	5.9(4.3)--pm(>>,forward)				2.5(1.1)--pm(<<,backward)
4y4o.cif1	161	1a.A.728.|1a.C.578.-1a.G.763.	1a.A.729.|1a.G.577.-1a.C.764.	AnsA_LnsL_RnsR	HC-S-S-LR-LR-SM	HC-S-S-LR-LR-SM	SM	LR	LR	LR	SM	SM	LR	SM	SM	(2,2)	3	3.6(3.0)--pm(>>,forward)				4.5(2.1)--pm(<<,backward)				6.7(3.6)--pm(>>,forward)
4y4o.cif1	162	1a.A.766.|1a.U.1510.-1a.G.1525.	1a.A.767.|1a.G.1511.-1a.C.1524.	AnsA_LnL_RnsR_RsL	JP-S-S-LR-LR-SM	JP-S-S-LR-LR-SM	SM	LR	LR	LR	SM	SM	LR	SM	SM	(2,2)	3	4.6(1.9)--pm(>>,forward)							2.1(0.2)--mm(<>,outward)	2.7(1.3)--pm(<<,backward)
4y4o.cif1	163	1a.A.958.|1a.C.985.-1a.G.1220.	1a.A.959.|1a.C.984.-1a.G.1221.	AnsA_LnL_RnsR	JC-S-S-LC-LC-SM	JC-S-S-LC-LC-SM	SM	LC	LC	LC	SM	SM	LC	SM	SM	(2,2)	3	7.1(5.1)--pm(>>,forward)								4.7(3.0)--pm(>>,forward)
4y4o.cif1	164	1a.A.1015.|1a.G.988.-1a.C.1217.	1a.A.1016.|1a.G.988.-1a.C.1217.	AnsA_LeL_ReR	HC-S-S-LR-LR-SM	HC-S-S-LR-LR-SM	SM	LR	LR	LR	SM	SM	LR	SM	SM	(2,1)	3	6.7(4.8)--pm(>>,forward)
4y4o.cif1	165	1a.A.1130.|1a.C.1128.-1a.G.1144.	1a.A.1130.|1a.C.1129.-1a.G.1143.	AeA_AnL_LnsL_RnsR	BC-S-S-LC-LC-SM	BC-S-S-LC-LC-SM	SM	LC	LC	LC	SM	SM	LC	SM	SM	(2,2)	4					1.4(0.1)--pm(>>,forward)				3.5(2.1)--pm(<<,backward)
4y4o.cif1	165	1a.A.1130.|1a.C.1128.-1a.G.1144.	1a.A.1146.|1a.C.1128.-1a.G.1144.	AsA_LeL_ReR	BC-S-S-LC-LC-SM	IC-S-S-LC-LC-SM	LR	LC	LC	LC	SM	SM	LC	SM	SM	(2,2)	4	5.7(4.9)--mm(<>,outward)
4y4o.cif1	165	1a.A.1130.|1a.C.1129.-1a.G.1143.	1a.A.1146.|1a.C.1128.-1a.G.1144.	AsA_LnsL_RnsR	BC-S-S-LC-LC-SM	IC-S-S-LC-LC-SM	LR	LC	LC	LC	SM	SM	LC	SM	SM	(2,2)	4	5.7(4.9)--mm(<>,outward)				1.4(0.1)--pm(<<,backward)				3.5(2.1)--pm(>>,forward)
4y4o.cif1	166	1a.A.1168.|1a.G.1088.-1a.C.1097.	1a.A.1169.|1a.G.1088.-1a.C.1097.	AnsA_LeL_ReR	HC-S-S-LR-LR-SM	HC-S-S-LR-LR-SM	SM	LR	LR	LR	SM	SM	LR	SM	SM	(3,2)	3	5.2(3.7)--pm(>>,forward)
4y4o.cif1	166	1a.A.1168.|1a.G.1088.-1a.C.1097.	1a.A.1170.|1a.G.1089.-1a.C.1096.	LnsL_RnR	HC-S-S-LR-LR-SM	HC-S-S-LR-LR-SM	SM	LR	LR	LR	SM	SM	LR	SM	SM	(3,2)	3					3.4(1.8)--pm(>>,forward)
4y4o.cif1	166	1a.A.1169.|1a.G.1088.-1a.C.1097.	1a.A.1170.|1a.G.1089.-1a.C.1096.	AnsA_LnsL_RnR	HC-S-S-LR-LR-SM	HC-S-S-LR-LR-SM	SM	LR	LR	LR	SM	SM	LR	SM	SM	(3,2)	3	6.5(4.8)--pm(>>,forward)				3.4(1.8)--pm(>>,forward)
4y4o.cif1	167	1a.A.1250.|1a.G.1353.-1a.C.1369.	1a.A.1251.|1a.G.1353.-1a.C.1369.	AnsA_LeL_ReR	IC-S-S-LR-LR-SM	IC-S-S-LR-LR-SM	SM	LR	LR	LR	SM	SM	LR	SM	SM	(5,4)	4	6.8(4.9)--pm(>>,forward)
4y4o.cif1	167	1a.A.1250.|1a.G.1353.-1a.C.1369.	1a.A.1251.|1a.C.1354.-1a.G.1368.	AnsA_LnsL_RnsR	IC-S-S-LR-LR-SM	IC-S-S-LR-LR-SM	SM	LR	LR	LR	SM	SM	LR	SM	SM	(5,4)	4	6.8(4.9)--pm(>>,forward)				5.2(2.2)--pm(>>,forward)				6.2(2.9)--pm(<<,backward)
4y4o.cif1	167	1a.A.1250.|1a.G.1353.-1a.C.1369.	1a.A.1287.|1a.C.1352.-1a.G.1370.	AsA_LnsL_RnsR	IC-S-S-LR-LR-SM	IC-S-S-LR-LR-SM	SM	LR	LR	LR	SM	SM	LR	SM	SM	(5,4)	4	5.9(3.9)--mm(<>,outward)				2.6(1.0)--pm(<<,backward)				1.8(0.4)--pm(>>,forward)
4y4o.cif1	167	1a.A.1250.|1a.G.1353.-1a.C.1369.	1a.A.1288.|1a.C.1352.-1a.G.1370.	LnsL_RnsR	IC-S-S-LR-LR-SM	IC-S-S-LR-LR-SM	SM	LR	LR	LR	SM	SM	LR	SM	SM	(5,4)	4					2.6(1.0)--pm(<<,backward)				1.8(0.4)--pm(>>,forward)
4y4o.cif1	167	1a.A.1251.|1a.G.1353.-1a.C.1369.	1a.A.1251.|1a.C.1354.-1a.G.1368.	AeA_LnsL_RnsR	IC-S-S-LR-LR-SM	IC-S-S-LR-LR-SM	SM	LR	LR	LR	SM	SM	LR	SM	SM	(5,4)	4					5.2(2.2)--pm(>>,forward)				6.2(2.9)--pm(<<,backward)
4y4o.cif1	167	1a.A.1251.|1a.G.1353.-1a.C.1369.	1a.A.1287.|1a.C.1352.-1a.G.1370.	LnsL_RnsR	IC-S-S-LR-LR-SM	IC-S-S-LR-LR-SM	SM	LR	LR	LR	SM	SM	LR	SM	SM	(5,4)	4					2.6(1.0)--pm(<<,backward)				1.8(0.4)--pm(>>,forward)
4y4o.cif1	167	1a.A.1251.|1a.G.1353.-1a.C.1369.	1a.A.1288.|1a.C.1352.-1a.G.1370.	LnsL_RnsR	IC-S-S-LR-LR-SM	IC-S-S-LR-LR-SM	SM	LR	LR	LR	SM	SM	LR	SM	SM	(5,4)	4					2.6(1.0)--pm(<<,backward)				1.8(0.4)--pm(>>,forward)
4y4o.cif1	168	1a.A.1261.|1a.C.1260.-1a.G.1274.	1a.A.1275.|1a.C.1260.-1a.G.1274.	AnL_AsA_LeL_ReR_RnA	IC-IC-IC-SM-SM-SM	IC-IC-IC-SM-SM-SM	SM	SM	SM	SM	SM	SM	SM	SM	SM	(2,1)	2	6.3(4.1)--mm(<>,outward)
4y4o.cif1	169	1a.A.1268.|1a.G.1311.-1a.C.1326.	1a.A.1269.|1a.G.1312.-1a.C.1325.	AnsA_LnsL_RnR	HC-S-S-LR-LR-SM	HC-S-S-LR-LR-SM	SM	LR	LR	LR	SM	SM	LR	SM	SM	(2,2)	3	6.7(4.6)--pm(>>,forward)				3.8(1.7)--pm(>>,forward)
4y4o.cif1	167	1a.A.1287.|1a.C.1352.-1a.G.1370.	1a.A.1288.|1a.C.1352.-1a.G.1370.	AnsA_LeL_ReR	IC-S-S-LR-LR-SM	IC-S-S-LR-LR-SM	SM	LR	LR	LR	SM	SM	LR	SM	SM	(5,4)	4	5.0(3.4)--pm(>>,forward)
4y4o.cif1	167	1a.A.1287.|1a.C.1352.-1a.G.1370.	1a.A.1289.|1a.U.1351.-1a.G.1371.	LnL_RnsR	IC-S-S-LR-LR-SM	IC-S-S-LR-LR-SM	SM	LR	LR	LR	SM	SM	LR	SM	SM	(5,4)	4									1.4(0.2)--pm(>>,forward)
4y4o.cif1	167	1a.A.1288.|1a.C.1352.-1a.G.1370.	1a.A.1289.|1a.U.1351.-1a.G.1371.	AnsA_LnL_RnsR	IC-S-S-LR-LR-SM	IC-S-S-LR-LR-SM	SM	LR	LR	LR	SM	SM	LR	SM	SM	(5,4)	4	5.0(4.1)--pm(>>,forward)								1.4(0.2)--pm(>>,forward)
4y4o.cif1	170	1a.A.1418.|1A.G.1970.-1A.C.1980.	1a.A.1483.|1A.C.1969.-1A.G.1981.	AsA_LnL_LsR_RnR	IC-S-S-LR-LR-SM	IC-S-S-LR-LR-SM	SM	LR	LR	LR	SM	SM	LR	SM	SM	(2,2)	4	4.0(2.5)--mm(<>,outward)					5.6(2.8)--mm(<>,outward)
4y4o.cif1	171	1a.A.1433.|1a.G.318.-1a.C.335.	1a.A.1434.|1a.G.319.-1a.C.334.	AnsA_LnsL_RnsR	IC-S-S-LR-LR-SM	IC-S-S-LR-LR-SM	SM	LR	LR	LR	SM	SM	LR	SM	SM	(2,2)	3	6.5(4.6)--pm(>>,forward)				3.6(2.2)--pm(>>,forward)				1.7(0.4)--pm(<<,backward)
4y4o.cif1	172	1a.MA6.1518.|1a.5MC.1404.-1a.G.1497.	1a.MA6.1519.|1a.5MC.1404.-1a.G.1497.	AnsA_LeL_ReR	HC-S-S-LR-LR-SM	HC-S-S-LR-LR-SM	SM	LR	LR	LR	SM	SM	LR	SM	SM	(2,1)	3	5.6(4.1)--pm(>>,forward)
4y4o.cif1	173	2A.A.14.|2A.C.2044.-2A.G.2624.	2A.A.526.|2A.C.2043.-2A.G.2625.	AsA_LnL_RnsR	JI-S-S-LR-LR-SM	JP-S-S-LC-LC-SM	LR	LR	LR	LC	SM	SM	LC	SM	SM	(2,2)	4	1.4(0.1)--mm(<>,outward)								4.1(2.1)--pm(>>,forward)
4y4o.cif1	174	2A.A.71.|2A.C.57.-2A.G.70.	2A.A.73.|2A.G.58.-2A.C.69.	AsA_LnsL_RnR_RsL	HP-S-S-LC-LC-SM	HP-S-S-LC-LC-SM	SM	LC	LC	LC	SM	SM	LC	SM	SM	(2,2)	3	2.2(1.1)--pm(>>,forward)				0.9(0.4)--pm(>>,forward)			2.7(0.5)--mm(<>,outward)
4y4o.cif1	175	2A.A.126.|2A.G.54.-2A.C.116.	2A.A.127.|2A.G.55.-2A.C.115.	AnsA_LnsL_RnR_RsL	HC-S-S-LR-LR-SM	HC-S-S-LR-LR-SM	SM	LR	LR	LR	SM	SM	LR	SM	SM	(2,2)	3	6.3(4.3)--pm(>>,forward)				3.4(1.5)--pm(>>,forward)			1.7(0.1)--mm(<>,outward)
4y4o.cif1	176	2A.A.141.|2A.C.1408.-2A.G.1594.	2A.A.142.|2A.C.1407.-2A.G.1595.	AnsA_LnL_RnsR	HC-S-S-LR-LR-SM	HC-S-S-LR-LR-SM	SM	LR	LR	LR	SM	SM	LR	SM	SM	(2,2)	3	6.7(4.7)--pm(>>,forward)								4.3(3.0)--pm(>>,forward)
4y4o.cif1	177	2A.A.182.|2A.G.44.-2A.C.433.	2A.A.432.|2A.C.183.-2A.G.214.	AnsL_RnsA	JC-S-S-LC-LC-SM	JCJP-JC-JC-SM-SM-SM	SM	SM	SM	LC	LC	LC	LC	LC	LC	(2,2)	5		5.7(4.5)--pm(>>,forward)					5.9(4.4)--pm(<<,backward)
4y4o.cif1	178	2A.A.190.|2A.C.679.-2A.G.798.	2A.A.191.|2A.C.678.-2A.G.799.	AnsA_LnsL_RnsR	HC-S-S-LR-LR-SM	HC-S-S-LR-LR-SM	SM	LR	LR	LR	SM	SM	LR	SM	SM	(2,2)	3	6.2(4.3)--pm(>>,forward)				2.3(0.8)--pm(<<,backward)				2.5(1.0)--pm(>>,forward)
4y4o.cif1	179	2A.A.199.|2A.C.2078.-2A.G.2242.	2A.A.2434.|2A.A.2077.-2A.U.2243.	AsA_LnsL_RnsR	HC-S-S-LR-LR-SM	JI-S-S-LC-LC-SM	LR	LR	LR	LC	SM	SM	LC	SM	SM	(2,2)	4	3.0(1.3)--mm(<>,outward)				2.4(1.6)--pm(<<,backward)				6.8(2.4)--pm(>>,forward)
4y4o.cif1	180	2A.A.271.|2A.G.272.C-2A.C.365.	2A.A.271.A|2A.G.272.D-2A.C.364.	AnsA_LnsL_RnR	JC-S-S-LC-LC-SM	JC-S-S-LC-LC-SM	SM	LC	LC	LC	SM	SM	LC	SM	SM	(2,2)	3	7.4(5.4)--pm(>>,forward)				4.1(2.5)--pm(>>,forward)
4y4o.cif1	181	2A.A.294.|2A.G.80.-2A.C.106.	2A.A.346.|2A.G.79.-2A.C.107.	LnsL_RnR	IC-S-S-LR-LR-SM	IC-S-S-LR-LR-SM	SM	LR	LR	LR	SM	SM	LR	SM	SM	(2,2)	4					4.2(2.7)--pm(<<,backward)
4y4o.cif1	182	2A.A.299.|2A.C.319.-2A.G.323.	2A.A.300.|2A.C.318.-2A.G.333.	AnsA_LnL_RsR	JI-HP-HP-LR-LR-SM	JI-S-S-LC-LC-SM	SM	LC	LC	LR	LC	LC	LR	LC	LC	(2,2)	4	7.2(5.2)--pm(>>,forward)								4.3(1.9)--pm(>>,forward)
4y4o.cif1	183	2A.A.514.|2A.C.581.-2A.G.1259.	2A.A.515.|2A.C.580.-2A.G.1260.	AnsA_LnsL_RnsR	JCJP-S-S-LC-LC-SM	JCJP-S-S-LC-LC-SM	SM	LC	LC	LC	SM	SM	LC	SM	SM	(2,2)	3	5.7(4.2)--pm(>>,forward)				1.4(0.2)--pm(<<,backward)				4.4(3.2)--pm(>>,forward)
4y4o.cif1	184	2A.A.532.|2A.A.2019.-2A.G.2035.	2A.A.532.|2A.A.2020.-2A.U.2034.	AeA_LnsL_RnsR	JP-JP-HC-SM-LR-LR	JP-JP-HC-SM-LR-LR	SM	SM	LR	SM	SM	LR	LR	LR	SM	(1,2)	3					3.9(1.8)--pm(>>,forward)				1.5(0.4)--pm(<<,backward)
4y4o.cif1	185	2A.A.586.|2A.C.671.-2A.G.809.	2A.A.1254.|2A.C.672.-2A.G.808.	AsA_LnL_RnsR	JC-S-S-LC-LC-SM	JC-S-S-LC-LC-SM	SM	LC	LC	LC	SM	SM	LC	SM	SM	(2,2)	4	1.4(0.3)--mm(<>,outward)								5.3(3.6)--pm(<<,backward)
4y4o.cif1	186	2A.A.608.|2A.C.237.-2A.G.260.	2A.A.608.|2A.C.238.-2A.G.259.	AeA_LnL_RnsR	IC-S-S-LR-LR-SM	IC-S-S-LR-LR-SM	SM	LR	LR	LR	SM	SM	LR	SM	SM	(3,2)	4									3.7(2.1)--pm(<<,backward)
4y4o.cif1	186	2A.A.608.|2A.C.237.-2A.G.260.	2A.A.609.|2A.C.237.-2A.G.260.	AnsA_LeL_ReR	IC-S-S-LR-LR-SM	IC-S-S-LR-LR-SM	SM	LR	LR	LR	SM	SM	LR	SM	SM	(3,2)	4	6.0(4.3)--pm(>>,forward)
4y4o.cif1	186	2A.A.608.|2A.C.237.-2A.G.260.	2A.A.621.|2A.C.238.-2A.G.259.	AsA_LnL_RnsR	IC-S-S-LR-LR-SM	IC-S-S-LR-LR-SM	SM	LR	LR	LR	SM	SM	LR	SM	SM	(3,2)	4	7.5(4.6)--mm(<>,outward)								3.7(2.1)--pm(<<,backward)
4y4o.cif1	186	2A.A.608.|2A.C.238.-2A.G.259.	2A.A.609.|2A.C.237.-2A.G.260.	AnsA_LnL_RnsR	IC-S-S-LR-LR-SM	IC-S-S-LR-LR-SM	SM	LR	LR	LR	SM	SM	LR	SM	SM	(3,2)	4	6.0(4.3)--pm(>>,forward)								3.7(2.1)--pm(>>,forward)
4y4o.cif1	186	2A.A.608.|2A.C.238.-2A.G.259.	2A.A.621.|2A.C.238.-2A.G.259.	AsA_LeL_ReR	IC-S-S-LR-LR-SM	IC-S-S-LR-LR-SM	SM	LR	LR	LR	SM	SM	LR	SM	SM	(3,2)	4	7.5(4.6)--mm(<>,outward)
4y4o.cif1	186	2A.A.609.|2A.C.237.-2A.G.260.	2A.A.621.|2A.C.238.-2A.G.259.	LnL_RnsR	IC-S-S-LR-LR-SM	IC-S-S-LR-LR-SM	SM	LR	LR	LR	SM	SM	LR	SM	SM	(3,2)	4									3.7(2.1)--pm(<<,backward)
4y4o.cif1	187	2A.A.643.|2A.U.2348.-2A.A.2369.	2A.A.644.|2A.G.2349.-2A.C.2368.	AnsA_LnL_RnR_RsL	HC-S-S-LR-LR-SM	HC-S-S-LR-LR-SM	SM	LR	LR	LR	SM	SM	LR	SM	SM	(3,2)	3	5.1(3.8)--pm(>>,forward)							3.7(2.0)--mm(<>,outward)
4y4o.cif1	187	2A.A.643.|2A.U.2348.-2A.A.2369.	2A.A.646.|2A.G.2349.-2A.C.2368.	LnL_RnR_RsL	HC-S-S-LR-LR-SM	HC-S-S-LR-LR-SM	SM	LR	LR	LR	SM	SM	LR	SM	SM	(3,2)	3								3.7(2.0)--mm(<>,outward)
4y4o.cif1	187	2A.A.644.|2A.G.2349.-2A.C.2368.	2A.A.646.|2A.G.2349.-2A.C.2368.	AsA_LeL_ReR	HC-S-S-LR-LR-SM	HC-S-S-LR-LR-SM	SM	LR	LR	LR	SM	SM	LR	SM	SM	(3,2)	3	5.8(4.0)--pm(>>,forward)
4y4o.cif1	188	2A.A.675.|2A.G.2067.-2A.C.2443.	2A.A.676.|2A.G.2069.-2A.C.2442.	AnsA_LsL_RnR	IC-S-S-LR-LR-SM	IC-S-S-LR-LR-SM	SM	LR	LR	LR	LR	LR	LR	LR	LR	(2,2)	5	7.3(5.4)--pm(>>,forward)				3.4(1.8)--pm(>>,forward)
4y4o.cif1	189	2A.A.861.|2B.C.79.-2B.G.98.	2B.A.78.|2A.G.862.-2A.C.915.	AnsL_LnsA	IC-S-S-LR-LR-SM	IC-IC-IC-LR-LR-SM	LR	SM	SM	LC	LR	LR	LC	LR	LR	(2,2)	5		3.4(1.5)--pm(>>,forward)		5.6(1.7)--pm(<<,backward)
4y4o.cif1	190	2A.A.878.|2A.U.877.-2A.A.899.	2A.A.900.|2A.U.877.-2A.A.899.	AnL_AsA_LeL_ReR_RnA	IC-IC-IC-SM-SM-SM	IC-IC-IC-SM-SM-SM	SM	SM	SM	SM	SM	SM	SM	SM	SM	(2,1)	2	5.6(3.8)--pm(>>,forward)
4y4o.cif1	191	2A.A.910.|2A.C.2264.-2A.G.2276.	2A.A.911.|2A.C.2263.-2A.G.2277.	AnsA_LnsL_RnsR	IC-S-S-LR-LR-SM	IC-S-S-LR-LR-SM	SM	LR	LR	LR	SM	SM	LR	SM	SM	(2,2)	3	5.4(3.8)--pm(>>,forward)				1.6(0.7)--pm(<<,backward)				2.1(0.6)--pm(>>,forward)
4y4o.cif1	192	2A.A.959.|2A.U.2457.-2A.G.2494.	2A.A.960.|2A.C.2456.-2A.G.2495.	AnsA_LnsL_RnsR	HC-S-S-LR-LR-SM	HC-S-S-LR-LR-SM	SM	LR	LR	LR	SM	SM	LR	SM	SM	(3,3)	4	6.3(4.8)--pm(>>,forward)				4.0(1.9)--pm(<<,backward)				4.2(2.4)--pm(>>,forward)
4y4o.cif1	192	2A.A.960.|2A.C.2456.-2A.G.2495.	2A.A.2031.|2A.G.2455.-2A.C.2496.	LnsL_RnsR	HC-S-S-LR-LR-SM	HC-S-S-LR-LR-SM	LR	LR	LR	LR	SM	SM	LR	SM	SM	(3,3)	4					5.5(2.4)--pm(<<,backward)				7.4(4.6)--pm(>>,forward)
4y4o.cif1	193	2A.A.980.|2A.C.2026.-2A.G.2037.	2A.A.981.|2A.G.2027.-2A.C.2036.	AnsA_LnsL_RnR_RsL	HC-S-S-LR-LR-SM	HC-S-S-LR-LR-SM	SM	LR	LR	LR	SM	SM	LR	SM	SM	(2,2)	3	6.5(4.4)--pm(>>,forward)				0.7(0.2)--pm(>>,forward)			3.9(1.1)--mm(<>,outward)
4y4o.cif1	194	2A.A.983.|2A.G.946.-2A.C.971.	2A.A.984.|2A.G.947.-2A.C.970.	AnsA_LnsL_RnsR	HC-S-S-LR-LR-SM	HC-S-S-LR-LR-SM	SM	LR	LR	LR	SM	SM	LR	SM	SM	(2,2)	3	7.3(5.1)--pm(>>,forward)				5.0(3.6)--pm(>>,forward)				2.0(0.5)--pm(<<,backward)
4y4o.cif1	195	2A.A.1000.|2A.C.976.-2A.G.987.	2A.A.1000.|2A.G.977.-2A.C.986.	AeA_LnL_RnR_RsL	IC-S-S-LR-LR-SM	IC-S-S-LR-LR-SM	SM	LR	LR	LR	SM	SM	LR	SM	SM	(5,4)	7								5.4(2.6)--mm(<>,outward)
4y4o.cif1	195	2A.A.1000.|2A.C.976.-2A.G.987.	2A.A.1001.|2A.G.977.-2A.C.986.	AnsA_LnL_RnR_RsL	IC-S-S-LR-LR-SM	IC-S-S-LR-LR-SM	SM	LR	LR	LR	SM	SM	LR	SM	SM	(5,4)	7	7.4(5.6)--pm(>>,forward)							5.4(2.6)--mm(<>,outward)
4y4o.cif1	195	2A.A.1000.|2A.C.976.-2A.G.987.	2A.A.1155.|2A.C.976.-2A.G.987.	AsA_LeL_ReR	IC-S-S-LR-LR-SM	IC-S-S-LR-LR-SM	SM	LR	LR	LR	SM	SM	LR	SM	SM	(5,4)	7	4.5(3.0)--mm(<>,outward)
4y4o.cif1	195	2A.A.1000.|2A.G.977.-2A.C.986.	2A.A.1001.|2A.G.977.-2A.C.986.	AnsA_LeL_ReR	IC-S-S-LR-LR-SM	IC-S-S-LR-LR-SM	SM	LR	LR	LR	SM	SM	LR	SM	SM	(5,4)	7	7.4(5.6)--pm(>>,forward)
4y4o.cif1	195	2A.A.1000.|2A.G.977.-2A.C.986.	2A.A.1155.|2A.C.976.-2A.G.987.	AsA_LnL_LsR_RnR	IC-S-S-LR-LR-SM	IC-S-S-LR-LR-SM	SM	LR	LR	LR	SM	SM	LR	SM	SM	(5,4)	7	4.5(3.0)--mm(<>,outward)					5.4(2.6)--mm(<>,outward)
4y4o.cif1	195	2A.A.1001.|2A.G.977.-2A.C.986.	2A.A.1009.|2A.G.1002.-2A.C.1153.	AnsL	IC-S-S-LR-LR-SM	IP-S-S-LR-LR-SM	LR	LC	LC	LR	LR	LR	LR	LR	LR	(5,4)	7		1.8(0.4)--pm(>>,forward)
4y4o.cif1	195	2A.A.1001.|2A.G.977.-2A.C.986.	2A.A.1155.|2A.C.976.-2A.G.987.	LnL_LsR_RnR	IC-S-S-LR-LR-SM	IC-S-S-LR-LR-SM	SM	LR	LR	LR	SM	SM	LR	SM	SM	(5,4)	7						5.4(2.6)--mm(<>,outward)
4y4o.cif1	195	2A.A.1009.|2A.G.1002.-2A.C.1153.	2A.A.1010.|2A.G.1003.-2A.C.1152.	AnsA_LnsL_RnR	IP-S-S-LR-LR-SM	IP-S-S-LR-LR-SM	SM	LR	LR	LR	SM	SM	LR	SM	SM	(5,4)	7	6.3(4.1)--pm(>>,forward)				4.7(2.0)--pm(>>,forward)
4y4o.cif1	196	2A.A.1028.|2A.C.2464.-2A.G.2486.	2A.A.1029.|2A.C.2465.-2A.G.2485.	AnsA_LnsL_RnsR	IP-S-S-LR-LR-SM	IP-S-S-LR-LR-SM	SM	LR	LR	LR	SM	SM	LR	SM	SM	(3,4)	4	1.7(1.2)--pm(>>,forward)				0.6(0.2)--pm(>>,forward)				2.3(0.9)--pm(<<,backward)
4y4o.cif1	196	2A.A.1028.|2A.C.2464.-2A.G.2486.	2A.A.1127.|2A.C.2463.-2A.G.2487.	LnL_RnsR	IP-S-S-LR-LR-SM	IP-S-S-LR-LR-SM	SM	LR	LR	LR	SM	SM	LR	SM	SM	(3,4)	4									3.3(1.5)--pm(>>,forward)
4y4o.cif1	196	2A.A.1127.|2A.U.2462.-2A.A.2488.	2A.A.1127.|2A.C.2463.-2A.G.2487.	AeA_LnsL_RnsR	IP-S-S-LR-LR-SM	IP-S-S-LR-LR-SM	SM	LR	LR	LR	SM	SM	LR	SM	SM	(3,4)	4					1.9(0.7)--pm(>>,forward)				3.7(2.3)--pm(<<,backward)
4y4o.cif1	197	2A.A.1128.|2A.G.2516.-2A.C.2568.	2A.A.1129.|2A.C.2515.-2A.G.2569.	AnsA_LnL_LsR_RnR	IP-S-S-LR-LR-SM	IP-S-S-LR-LR-SM	SM	LR	LR	LR	SM	SM	LR	SM	SM	(2,2)	3	4.0(2.0)--pm(>>,forward)					4.8(2.1)--mm(<>,outward)
4y4o.cif1	198	2A.A.1274.|2A.G.1296.-2A.C.1644.	2A.A.1275.|2A.C.1295.-2A.G.1645.	AnA_LnL_LsR_RnR	JC-S-S-LC-LC-SM	JC-S-S-LC-LC-SM	SM	LC	LC	LC	SM	SM	LC	SM	SM	(3,3)	4						5.3(2.5)--mm(<>,outward)
4y4o.cif1	198	2A.A.1274.|2A.G.1296.-2A.C.1644.	2A.A.1302.|2A.C.1297.-2A.G.1643.	AsA_LnsL_RnsR	JC-S-S-LC-LC-SM	JC-S-S-LC-LC-SM	LR	LC	LC	LC	SM	SM	LC	SM	SM	(3,3)	4	1.2(0.1)--mm(<>,outward)				4.4(1.9)--pm(>>,forward)				5.6(2.2)--pm(<<,backward)
4y4o.cif1	199	2A.A.1353.|2A.C.693.-2A.G.769.	2A.A.1354.|2A.C.692.-2A.G.770.	AnsA_LnL_RnsR	IC-S-S-LR-LR-SM	IC-S-S-LR-LR-SM	SM	LR	LR	LR	SM	SM	LR	SM	SM	(3,3)	4	5.8(4.1)--pm(>>,forward)								3.6(2.1)--pm(>>,forward)
4y4o.cif1	199	2A.A.1353.|2A.C.693.-2A.G.769.	2A.A.1379.|2A.U.694.-2A.G.768.	LnsL_RnsR	IC-S-S-LR-LR-SM	IC-S-S-LR-LR-SM	SM	LR	LR	LR	SM	SM	LR	SM	SM	(3,3)	4					3.4(1.3)--pm(>>,forward)				5.4(3.3)--pm(<<,backward)
4y4o.cif1	200	2A.A.1392.|2A.C.1315.-2A.G.1337.	2A.A.1393.|2A.C.1314.-2A.G.1338.	AnsA_LnL_RnsR	HC-S-S-LR-LR-SM	HC-S-S-LR-LR-SM	SM	LR	LR	LR	SM	SM	LR	SM	SM	(2,2)	3	7.6(5.4)--pm(>>,forward)								4.7(3.3)--pm(>>,forward)
4y4o.cif1	201	2A.A.1449.|2A.G.1448.-2A.C.1463.	2A.A.1528.|2A.G.1447.-2A.C.1464.	LnsL_RnR	BC-S-S-LC-LC-SM	JCJP-S-S-LC-LC-SM	LR	LC	LC	LC	SM	SM	LC	SM	SM	(5,3)	5					3.1(1.6)--pm(<<,backward)
4y4o.cif1	201	2A.A.1449.|2A.G.1448.-2A.C.1463.	2A.A.1528.A|2A.G.1448.-2A.C.1463.	AnL_AsA_LeL_ReR	BC-S-S-LC-LC-SM	JCJP-S-S-LC-LC-SM	LR	LC	LC	LC	SM	SM	LC	SM	SM	(5,3)	5	0.2(0.2)--mp(<<,backward)
4y4o.cif1	201	2A.A.1449.|2A.G.1448.-2A.C.1463.	2A.A.1544.|2A.G.1447.-2A.C.1464.	LnsL_RnR	BC-S-S-LC-LC-SM	JCJP-S-S-LC-LC-SM	LR	LC	LC	LC	SM	SM	LC	SM	SM	(5,3)	5					3.1(1.6)--pm(<<,backward)
4y4o.cif1	201	2A.A.1528.|2A.G.1447.-2A.C.1464.	2A.A.1528.A|2A.G.1448.-2A.C.1463.	AnsA_LnsL_RnR	JCJP-S-S-LC-LC-SM	JCJP-S-S-LC-LC-SM	SM	LC	LC	LC	SM	SM	LC	SM	SM	(5,3)	5	3.4(2.5)--pm(>>,forward)				3.1(1.6)--pm(>>,forward)
4y4o.cif1	201	2A.A.1528.|2A.G.1447.-2A.C.1464.	2A.A.1544.|2A.G.1447.-2A.C.1464.	LeL_ReR	JCJP-S-S-LC-LC-SM	JCJP-S-S-LC-LC-SM	SM	LC	LC	LC	SM	SM	LC	SM	SM	(5,3)	5
4y4o.cif1	201	2A.A.1528.|2A.G.1447.-2A.C.1464.	2A.A.1545.|2A.C.1446.-2A.G.1465.	LnL_LsR_RnR	JCJP-S-S-LC-LC-SM	JCJP-S-S-LC-LC-SM	SM	LC	LC	LC	SM	SM	LC	SM	SM	(5,3)	5						3.5(1.0)--mm(<>,outward)
4y4o.cif1	201	2A.A.1528.A|2A.G.1448.-2A.C.1463.	2A.A.1544.|2A.G.1447.-2A.C.1464.	LnsL_RnR	JCJP-S-S-LC-LC-SM	JCJP-S-S-LC-LC-SM	SM	LC	LC	LC	SM	SM	LC	SM	SM	(5,3)	5					3.1(1.6)--pm(<<,backward)
4y4o.cif1	201	2A.A.1544.|2A.G.1447.-2A.C.1464.	2A.A.1545.|2A.C.1446.-2A.G.1465.	AnsA_LnL_LsR_RnR	JCJP-S-S-LC-LC-SM	JCJP-S-S-LC-LC-SM	SM	LC	LC	LC	SM	SM	LC	SM	SM	(5,3)	5	6.5(4.5)--pm(>>,forward)					3.5(1.0)--mm(<>,outward)
4y4o.cif1	202	2A.A.1569.|2A.C.1351.-2A.G.1380.	2A.A.1570.|2A.C.1351.-2A.G.1380.	AnsA_LeL_ReR	ICJP-S-S-LR-LR-SM	ICJP-S-S-LR-LR-SM	SM	LR	LR	LR	SM	SM	LR	SM	SM	(4,2)	3	5.8(4.2)--pm(>>,forward)
4y4o.cif1	202	2A.A.1569.|2A.C.1351.-2A.G.1380.	2A.A.1571.|2A.C.1351.-2A.G.1380.	LeL_ReR	ICJP-S-S-LR-LR-SM	ICJP-S-S-LR-LR-SM	SM	LR	LR	LR	SM	SM	LR	SM	SM	(4,2)	3
4y4o.cif1	202	2A.A.1569.|2A.C.1351.-2A.G.1380.	2A.A.1572.|2A.C.1350.-2A.G.1381.	LnL_RnsR	ICJP-S-S-LR-LR-SM	ICJP-S-S-LR-LR-SM	SM	LR	LR	LR	SM	SM	LR	SM	SM	(4,2)	3									2.1(0.7)--pm(>>,forward)
4y4o.cif1	202	2A.A.1570.|2A.C.1351.-2A.G.1380.	2A.A.1571.|2A.C.1351.-2A.G.1380.	AnsA_LeL_ReR	ICJP-S-S-LR-LR-SM	ICJP-S-S-LR-LR-SM	SM	LR	LR	LR	SM	SM	LR	SM	SM	(4,2)	3	5.7(4.1)--pm(>>,forward)
4y4o.cif1	202	2A.A.1570.|2A.C.1351.-2A.G.1380.	2A.A.1572.|2A.C.1350.-2A.G.1381.	LnL_RnsR	ICJP-S-S-LR-LR-SM	ICJP-S-S-LR-LR-SM	SM	LR	LR	LR	SM	SM	LR	SM	SM	(4,2)	3									2.1(0.7)--pm(>>,forward)
4y4o.cif1	202	2A.A.1571.|2A.C.1351.-2A.G.1380.	2A.A.1572.|2A.C.1350.-2A.G.1381.	AnsA_LnL_RnsR	ICJP-S-S-LR-LR-SM	ICJP-S-S-LR-LR-SM	SM	LR	LR	LR	SM	SM	LR	SM	SM	(4,2)	3	2.5(2.1)--pm(>>,forward)								2.1(0.7)--pm(>>,forward)
4y4o.cif1	203	2A.A.1759.|2A.U.2696.-2A.A.2711.	2A.A.1760.|2A.C.1631.-2A.G.1635.	AnsA	JC-S-S-LR-LR-SM	JC-S-S-LR-LR-SM	SM	LR	LR	LR	LR	LR	LR	LR	LR	(2,2)	5	2.6(2.1)--pm(>>,forward)
4y4o.cif1	204	2A.A.1785.|2A.G.2588.-2A.C.2606.	2A.A.1938.|2A.A.2589.-2A.PSU.2605.	LnsL_RnR	HC-JC-JC-LR-LR-SM	JC-JC-JC-LR-LR-SM	LR	LR	LR	LR	SM	SM	LR	SM	SM	(2,2)	4					5.9(3.3)--pm(>>,forward)
4y4o.cif1	205	2A.A.1802.|2A.U.1798.-2A.A.1821.	2A.A.1803.|2A.C.1797.-2A.G.1822.	AnsA_LnsL_RnsR	IC-S-S-LC-LC-SM	IC-S-S-LC-LC-SM	SM	LC	LC	LC	SM	SM	LC	SM	SM	(2,2)	3	6.7(4.9)--pm(>>,forward)				1.2(0.4)--pm(<<,backward)				2.3(2.1)--pm(>>,forward)
4y4o.cif1	206	2A.A.1809.|2A.C.1363.-2A.G.1368.	2A.A.1810.|2A.C.1362.-2A.G.1369.	AnsA_LnsL_RnsR	HC-S-S-LR-LR-SM	HC-S-S-LR-LR-SM	SM	LR	LR	LR	SM	SM	LR	SM	SM	(2,2)	3	6.8(4.9)--pm(>>,forward)				0.4(0.1)--pm(<<,backward)				1.4(0.2)--pm(>>,forward)
4y4o.cif1	207	2A.A.1848.|2A.G.1846.-2A.C.1894.	2a.A.702.|2A.G.1846.-2A.C.1894.	AsA_LeL_ReR	BC-S-S-LC-LC-SM	IC-S-S-LR-LR-SM	LR	LC	LC	LR	SM	SM	LR	SM	SM	(2,1)	4	6.6(3.4)--mm(<>,outward)
4y4o.cif1	208	2A.A.1853.|2A.U.2086.-2A.U.2233.	2A.A.1854.|2A.G.2087.-2A.U.2232.	AnsA_LnL_RnR_RsL	IC-IC-IC-LR-LR-SM	IC-S-S-LR-LR-SM	SM	LR	LR	LR	LC	LC	LR	LC	LC	(4,3)	8	3.6(2.9)--pm(>>,forward)							3.5(0.4)--mm(<>,outward)
4y4o.cif1	208	2A.A.1853.|2A.U.2086.-2A.U.2233.	2A.A.1889.|2A.C.2085.-2A.G.2234.	AsA_LnsL_RnsR	IC-IC-IC-LR-LR-SM	IC-S-S-LR-LR-SM	SM	LR	LR	LR	LC	LC	LR	LC	LC	(4,3)	8	5.3(2.7)--mm(<>,outward)				3.6(1.6)--pm(<<,backward)				2.1(0.7)--pm(>>,forward)
4y4o.cif1	208	2A.A.1853.|2A.U.2086.-2A.U.2233.	2A.A.1889.|2A.U.2086.-2A.U.2233.	AsA_LeL_ReR	IC-IC-IC-LR-LR-SM	IC-IC-IC-LR-LR-SM	SM	LR	LR	LR	SM	SM	LR	SM	SM	(4,3)	8	5.3(2.7)--mm(<>,outward)
4y4o.cif1	208	2A.A.1853.|2A.U.2086.-2A.U.2233.	2A.A.1890.|2A.C.2085.-2A.G.2234.	LnsL_RnsR	IC-IC-IC-LR-LR-SM	IC-S-S-LR-LR-SM	SM	LR	LR	LR	LC	LC	LR	LC	LC	(4,3)	8					3.6(1.6)--pm(<<,backward)				2.1(0.7)--pm(>>,forward)
4y4o.cif1	208	2A.A.1854.|2A.G.2087.-2A.U.2232.	2A.A.1889.|2A.U.2086.-2A.U.2233.	LnL_LsR_RnR	IC-S-S-LR-LR-SM	IC-IC-IC-LR-LR-SM	SM	LR	LR	LR	LC	LC	LR	LC	LC	(4,3)	8						3.5(0.4)--mm(<>,outward)
4y4o.cif1	208	2A.A.1889.|2A.C.2085.-2A.G.2234.	2A.A.1889.|2A.U.2086.-2A.U.2233.	AeA_LnsL_RnsR	IC-S-S-LR-LR-SM	IC-IC-IC-LR-LR-SM	SM	LR	LR	LR	LC	LC	LR	LC	LC	(4,3)	8					3.6(1.6)--pm(>>,forward)				2.1(0.7)--pm(<<,backward)
4y4o.cif1	208	2A.A.1889.|2A.C.2085.-2A.G.2234.	2A.A.1890.|2A.C.2085.-2A.G.2234.	AnsA_LeL_ReR	IC-S-S-LR-LR-SM	IC-S-S-LR-LR-SM	SM	LR	LR	LR	SM	SM	LR	SM	SM	(4,3)	8	6.8(4.9)--pm(>>,forward)
4y4o.cif1	208	2A.A.1889.|2A.U.2086.-2A.U.2233.	2A.A.1890.|2A.C.2085.-2A.G.2234.	AnsA_LnsL_RnsR	IC-IC-IC-LR-LR-SM	IC-S-S-LR-LR-SM	SM	LR	LR	LR	LC	LC	LR	LC	LC	(4,3)	8	6.8(4.9)--pm(>>,forward)				3.6(1.6)--pm(<<,backward)				2.1(0.7)--pm(>>,forward)
4y4o.cif1	209	2A.A.1900.|2A.C.1793.-2A.G.1826.	2A.A.1970.|2A.G.1792.-2A.C.1827.	AsA_LnsL_RnsR	BC-S-S-LR-LR-SM	JC-S-S-LR-LR-SM	LR	LR	LR	LR	SM	SM	LR	SM	SM	(3,3)	6	3.5(3.3)--mp(<<,backward)				5.6(2.7)--pm(<<,backward)				7.4(3.8)--pm(>>,forward)
4y4o.cif1	209	2A.A.1900.|2A.C.1793.-2A.G.1826.	2A.A.1970.|2A.C.1793.-2A.G.1826.	AsA_LeL_ReR	BC-S-S-LR-LR-SM	JC-S-S-LR-LR-SM	LR	LR	LR	LR	SM	SM	LR	SM	SM	(3,3)	6	3.5(3.3)--mp(<<,backward)
4y4o.cif1	210	2A.A.1927.|2A.C.1837.-2A.G.1903.	2A.A.1928.|2A.C.1836.-2A.G.1904.	AnsA_LnL_RnsR	JC-S-S-LC-LC-SM	JC-S-S-LC-LC-SM	SM	LC	LC	LC	SM	SM	LC	SM	SM	(2,2)	3	4.7(3.3)--pm(>>,forward)								3.0(1.4)--pm(>>,forward)
4y4o.cif1	211	2A.A.1952.|2A.G.2548.-2A.C.2560.	2A.A.1953.|2A.G.2549.-2A.C.2559.	AnsA_LnsL_RnR	HC-S-S-LR-LR-SM	HC-S-S-LR-LR-SM	SM	LR	LR	LR	SM	SM	LR	SM	SM	(2,2)	3	7.2(5.2)--pm(>>,forward)				4.2(2.3)--pm(>>,forward)
4y4o.cif1	209	2A.A.1969.|2A.U.1833.-2A.A.1972.	2A.A.1970.|2A.G.1792.-2A.C.1827.	AnA_RsA	JC-S-S-LC-LC-SM	JC-S-S-LR-LR-SM	SM	LR	LR	LC	LR	LR	LC	LR	LR	(3,3)	6							2.3(1.1)--mm(<>,outward)
4y4o.cif1	209	2A.A.1969.|2A.U.1833.-2A.A.1972.	2A.A.1970.|2A.C.1793.-2A.G.1826.	AnA_RsA	JC-S-S-LC-LC-SM	JC-S-S-LR-LR-SM	SM	LR	LR	LC	LR	LR	LC	LR	LR	(3,3)	6							2.3(1.1)--mm(<>,outward)
4y4o.cif1	209	2A.A.1970.|2A.G.1792.-2A.C.1827.	2A.A.1970.|2A.C.1793.-2A.G.1826.	AeA_LnsL_RnsR	JC-S-S-LR-LR-SM	JC-S-S-LR-LR-SM	SM	LR	LR	LR	SM	SM	LR	SM	SM	(3,3)	6					5.6(2.7)--pm(>>,forward)				7.4(3.8)--pm(<<,backward)
4y4o.cif1	212	2A.A.2273.|2A.A.953.-2A.C.964.	2A.A.2274.|2A.A.953.-2A.C.964.	AnsA_LeL_ReR	HC-IC-IC-LR-LR-SM	HC-IC-IC-LR-LR-SM	SM	LR	LR	LR	SM	SM	LR	SM	SM	(2,2)	5	2.4(1.7)--pm(>>,forward)
4y4o.cif1	212	2A.A.2273.|2A.A.953.-2A.C.964.	2A.A.2274.|2A.G.954.-2A.U.963.	AnsA_LnsL_RnsR	HC-IC-IC-LR-LR-SM	HC-S-S-LR-LR-SM	SM	LR	LR	LR	LC	LC	LR	LC	LC	(2,2)	5	2.4(1.7)--pm(>>,forward)				2.0(1.8)--pm(>>,forward)				1.7(0.2)--pm(<<,backward)
4y4o.cif1	212	2A.A.2274.|2A.A.953.-2A.C.964.	2A.A.2274.|2A.G.954.-2A.U.963.	AeA_LnsL_RnsR	HC-IC-IC-LR-LR-SM	HC-S-S-LR-LR-SM	SM	LR	LR	LR	LC	LC	LR	LC	LC	(2,2)	5					2.0(1.8)--pm(>>,forward)				1.7(0.2)--pm(<<,backward)
4y4o.cif1	213	2A.A.2327.|2A.C.2261.-2A.G.2279.	2A.A.2388.|2A.C.2260.-2A.G.2280.	AsA_LnL_RnsR	HP-S-S-LR-LR-SM	JIJP-S-S-LC-LC-SM	LR	LR	LR	LC	SM	SM	LC	SM	SM	(2,2)	4	3.0(1.4)--mm(<>,outward)								4.1(2.2)--pm(>>,forward)
4y4o.cif1	214	2A.A.2564.|2A.C.2521.-2A.G.2544.	2A.A.2565.|2A.C.2520.-2A.G.2545.	AnsA_LnL_RnsR	JC-S-S-LC-LC-SM	JC-S-S-LC-LC-SM	SM	LC	LC	LC	SM	SM	LC	SM	SM	(2,2)	3	7.7(5.6)--pm(>>,forward)								4.2(2.7)--pm(>>,forward)
4y4o.cif1	215	2A.A.2740.|2A.G.2523.-2A.C.2540.	2A.A.2740.|2A.G.2524.-2A.C.2539.	AeA_LnsL_RnR	IC-S-S-LR-LR-SM	IC-S-S-LR-LR-SM	SM	LR	LR	LR	SM	SM	LR	SM	SM	(3,2)	4					3.3(1.7)--pm(>>,forward)
4y4o.cif1	215	2A.A.2740.|2A.G.2523.-2A.C.2540.	2A.A.2741.|2A.G.2524.-2A.C.2539.	AnsA_LnsL_RnR	IC-S-S-LR-LR-SM	IC-S-S-LR-LR-SM	SM	LR	LR	LR	SM	SM	LR	SM	SM	(3,2)	4	7.0(5.1)--pm(>>,forward)				3.3(1.7)--pm(>>,forward)
4y4o.cif1	215	2A.A.2740.|2A.G.2523.-2A.C.2540.	2A.A.2764.|2A.G.2523.-2A.C.2540.	AsA_LeL_ReR	IC-S-S-LR-LR-SM	IC-S-S-LR-LR-SM	SM	LR	LR	LR	SM	SM	LR	SM	SM	(3,2)	4	5.9(4.0)--mm(<>,outward)
4y4o.cif1	215	2A.A.2740.|2A.G.2524.-2A.C.2539.	2A.A.2741.|2A.G.2524.-2A.C.2539.	AnsA_LeL_ReR	IC-S-S-LR-LR-SM	IC-S-S-LR-LR-SM	SM	LR	LR	LR	SM	SM	LR	SM	SM	(3,2)	4	7.0(5.1)--pm(>>,forward)
4y4o.cif1	215	2A.A.2740.|2A.G.2524.-2A.C.2539.	2A.A.2764.|2A.G.2523.-2A.C.2540.	AsA_LnsL_RnR	IC-S-S-LR-LR-SM	IC-S-S-LR-LR-SM	SM	LR	LR	LR	SM	SM	LR	SM	SM	(3,2)	4	5.9(4.0)--mm(<>,outward)				3.3(1.7)--pm(<<,backward)
4y4o.cif1	215	2A.A.2741.|2A.G.2524.-2A.C.2539.	2A.A.2764.|2A.G.2523.-2A.C.2540.	LnsL_RnR	IC-S-S-LR-LR-SM	IC-S-S-LR-LR-SM	SM	LR	LR	LR	SM	SM	LR	SM	SM	(3,2)	4					3.3(1.7)--pm(<<,backward)
4y4o.cif1	216	2A.A.2809.|2A.G.2630.-2A.C.2788.	2A.A.2810.|2A.G.2631.-2A.C.2787.	AnsA_LnsL_RnR	JI-S-S-LC-LC-SM	JI-S-S-LC-LC-SM	SM	LC	LC	LC	SM	SM	LC	SM	SM	(2,2)	3	4.9(3.6)--pm(>>,forward)				4.1(2.8)--pm(>>,forward)
4y4o.cif1	217	2a.A.1418.|2A.G.1948.-2A.C.1958.	2a.A.1483.|2A.C.1947.-2A.G.1959.	AsA_LnL_LsR_RnR	IC-S-S-LR-LR-SM	IC-S-S-LR-LR-SM	SM	LR	LR	LR	SM	SM	LR	SM	SM	(2,2)	4	3.9(2.3)--mm(<>,outward)					5.0(2.2)--mm(<>,outward)
4yaz.cif1	218	R.A.9.|R.G.8.-R.C.76.	R.A.11.|R.G.8.-R.C.76.	AnL_AsA_LeL_ReR	JC-S-S-LC-LC-SM	JC-S-S-LC-LC-SM	SM	LC	LC	LC	SM	SM	LC	SM	SM	(4,2)	4	4.9(3.4)--pm(>>,forward)
4yaz.cif1	218	R.A.9.|R.G.8.-R.C.76.	R.A.78.|R.C.7.-R.G.77.	AsA_LnsL_RnsR	JC-S-S-LC-LC-SM	IC-S-S-LC-LC-SM	LR	LC	LC	LC	SM	SM	LC	SM	SM	(4,2)	4	5.5(3.2)--mm(<>,outward)				2.4(0.6)--pm(<<,backward)				2.1(0.3)--pm(>>,forward)
4yaz.cif1	218	R.A.9.|R.G.8.-R.C.76.	R.A.79.|R.C.7.-R.G.77.	LnsL_RnsR	JC-S-S-LC-LC-SM	IC-S-S-LC-LC-SM	LR	LC	LC	LC	SM	SM	LC	SM	SM	(4,2)	4					2.4(0.6)--pm(<<,backward)				2.1(0.3)--pm(>>,forward)
4yaz.cif1	218	R.A.11.|R.G.8.-R.C.76.	R.A.78.|R.C.7.-R.G.77.	LnsL_RnsR	JC-S-S-LC-LC-SM	IC-S-S-LC-LC-SM	LR	LC	LC	LC	SM	SM	LC	SM	SM	(4,2)	4					2.4(0.6)--pm(<<,backward)				2.1(0.3)--pm(>>,forward)
4yaz.cif1	218	R.A.11.|R.G.8.-R.C.76.	R.A.79.|R.C.7.-R.G.77.	LnsL_RnsR	JC-S-S-LC-LC-SM	IC-S-S-LC-LC-SM	LR	LC	LC	LC	SM	SM	LC	SM	SM	(4,2)	4					2.4(0.6)--pm(<<,backward)				2.1(0.3)--pm(>>,forward)
4yaz.cif1	218	R.A.78.|R.C.7.-R.G.77.	R.A.79.|R.C.7.-R.G.77.	AnR_AnsA_LeL_ReR	IC-S-S-LC-LC-SM	IC-S-S-LC-LC-SM	SM	LC	LC	LC	SM	SM	LC	SM	SM	(4,2)	4	5.9(4.2)--pm(>>,forward)
5d8h.cif1	219	A.A.1194.|A.G.1164.-A.C.1215.	A.A.1195.|A.G.1165.-A.C.1214.	AnsA_LnsL_RnR	JC-S-S-LC-LC-SM	JC-S-S-LC-LC-SM	SM	LC	LC	LC	SM	SM	LC	SM	SM	(2,2)	3	7.7(5.8)--pm(>>,forward)				4.0(2.5)--pm(>>,forward)
5dm6.cif1	220	X.A.14.|X.C.2044.-X.G.2624.	X.A.526.|X.C.2043.-X.G.2625.	LnL_LsR_RnsR	JI-S-S-LR-LR-SM	JP-S-S-LC-LC-SM	LR	LR	LR	LC	SM	SM	LC	SM	SM	(2,2)	4						1.6(0.1)--mm(<>,outward)			3.4(1.8)--pm(>>,forward)
5dm6.cif1	221	X.A.71.|X.C.57.-X.G.70.	X.A.73.|X.G.58.-X.C.69.	AsA_LnL_RnR_RsL	HP-S-S-LC-LC-SM	HP-S-S-LC-LC-SM	SM	LC	LC	LC	SM	SM	LC	SM	SM	(2,2)	3	2.1(1.0)--pm(>>,forward)							3.5(1.0)--mm(<>,outward)
5dm6.cif1	222	X.A.126.|X.G.54.-X.C.116.	X.A.127.|X.G.55.-X.C.115.	AnsA_LnsL_RnR_RsL	HC-S-S-LR-LR-SM	HC-S-S-LR-LR-SM	SM	LR	LR	LR	SM	SM	LR	SM	SM	(2,2)	3	5.6(4.0)--pm(>>,forward)				2.8(1.0)--pm(>>,forward)			1.7(0.1)--mm(<>,outward)
5dm6.cif1	223	X.A.161.|X.G.45.-X.C.433.	X.A.432.|X.C.162.-X.G.186.	AnsL_RnsA	JC-S-S-LC-LC-SM	JCJP-JC-JC-SM-SM-SM	SM	SM	SM	LC	LC	LC	LC	LC	LC	(2,2)	5		6.1(4.1)--pm(>>,forward)					6.1(4.2)--pm(<<,backward)
5dm6.cif1	224	X.A.165.D|X.C.678.-X.G.799.	X.A.165.E|X.C.678.-X.G.799.	AnsA_LeL_ReR	HC-S-S-LR-LR-SM	HC-S-S-LR-LR-SM	SM	LR	LR	LR	SM	SM	LR	SM	SM	(2,1)	3	5.3(3.8)--pm(>>,forward)
5dm6.cif1	225	X.A.171.|X.C.2078.-X.G.2242.	X.A.2434.|X.A.2077.-X.U.2243.	AsA_LnsL_RnsR	HC-S-S-LR-LR-SM	JI-S-S-LC-LC-SM	LR	LR	LR	LC	SM	SM	LC	SM	SM	(2,2)	4	2.3(0.8)--mm(<>,outward)				2.0(1.1)--pm(<<,backward)				6.8(2.6)--pm(>>,forward)
5dm6.cif1	226	X.A.299.|X.C.319.-X.G.323.	X.A.300.|X.C.318.-X.G.333.	AnsA_LnL_RsR	JI-HP-HP-LR-LR-SM	JI-S-S-LC-LC-SM	SM	LC	LC	LR	LC	LC	LR	LC	LC	(2,2)	4	6.9(4.8)--pm(>>,forward)								3.3(0.5)--pm(>>,forward)
5dm6.cif1	227	X.A.345.|X.G.80.-X.C.106.	X.A.346.|X.C.79.-X.G.107.	AnA_LnL_LsR_RnR	IC-S-S-LR-LR-SM	IC-S-S-LR-LR-SM	SM	LR	LR	LR	SM	SM	LR	SM	SM	(2,2)	3						5.3(2.5)--mm(<>,outward)
5dm6.cif1	228	X.A.514.|X.C.581.-X.G.1259.	X.A.515.|X.C.580.-X.G.1260.	AnsA_LnsL_RnsR	JCJP-S-S-LC-LC-SM	JCJP-S-S-LC-LC-SM	SM	LC	LC	LC	SM	SM	LC	SM	SM	(2,2)	3	6.4(4.6)--pm(>>,forward)				2.5(0.4)--pm(<<,backward)				4.6(3.2)--pm(>>,forward)
5dm6.cif1	229	X.A.532.|X.A.2019.-X.G.2035.	X.A.532.|X.A.2020.-X.U.2034.	AeA_LnsL_RnsR	JP-JP-HC-SM-LR-LR	JP-JP-HC-SM-LR-LR	SM	SM	LR	SM	SM	LR	LR	LR	SM	(1,2)	3					2.7(2.2)--pm(>>,forward)				1.2(0.1)--pm(<<,backward)
5dm6.cif1	230	X.A.586.|X.C.671.-X.G.809.	X.A.1254.|X.U.672.-X.A.808.	AsA_LnsL_RnsR	JC-S-S-LC-LC-SM	JC-S-S-LC-LC-SM	SM	LC	LC	LC	SM	SM	LC	SM	SM	(2,2)	4	1.6(0.4)--mm(<>,outward)				4.3(0.9)--pm(>>,forward)				3.1(2.9)--pm(<<,backward)
5dm6.cif1	231	X.A.607.|X.C.209.-X.G.232.	X.A.608.|X.C.209.-X.G.232.	AnsA_LeL_ReR	IC-S-S-LR-LR-SM	IC-S-S-LR-LR-SM	SM	LR	LR	LR	SM	SM	LR	SM	SM	(3,2)	4	5.3(4.1)--pm(>>,forward)
5dm6.cif1	231	X.A.607.|X.C.209.-X.G.232.	X.A.621.|X.G.210.-X.C.231.	AsA_LnL_RnR_RsL	IC-S-S-LR-LR-SM	IC-S-S-LR-LR-SM	SM	LR	LR	LR	SM	SM	LR	SM	SM	(3,2)	4	6.0(3.8)--mm(<>,outward)							5.8(2.8)--mm(<>,outward)
5dm6.cif1	231	X.A.608.|X.C.209.-X.G.232.	X.A.621.|X.G.210.-X.C.231.	LnL_RnR_RsL	IC-S-S-LR-LR-SM	IC-S-S-LR-LR-SM	SM	LR	LR	LR	SM	SM	LR	SM	SM	(3,2)	4								5.8(2.8)--mm(<>,outward)
5dm6.cif1	232	X.A.643.|X.U.2348.-X.A.2369.	X.A.644.|X.G.2349.-X.C.2368.	AnsA_LnL_RnR_RsL	HC-S-S-LR-LR-SM	HC-S-S-LR-LR-SM	SM	LR	LR	LR	SM	SM	LR	SM	SM	(2,2)	3	2.1(1.3)--pm(>>,forward)							3.9(2.5)--mm(<>,outward)
5dm6.cif1	233	X.A.693.|X.A.1353.-X.U.1379.	X.A.1353.|X.A.693.-X.U.769.	AeL_LeA	S-IC-IC-LR-LR-SM	IC-S-S-LR-LR-SM	LR	SM	SM	SM	LR	LR	SM	LR	LR	(3,3)	4
5dm6.cif1	233	X.A.693.|X.A.1353.-X.U.1379.	X.A.1354.|X.C.692.-X.G.770.	AnsL_AsR_LnsA	S-IC-IC-LR-LR-SM	IC-S-S-LR-LR-SM	LR	SM	SM	SM	LR	LR	SM	LR	LR	(3,3)	4		0.6(0.1)--pm(<<,backward)	2.3(0.7)--mm(<>,outward)	4.0(2.7)--pm(>>,forward)
5dm6.cif1	234	X.A.910.|X.C.2264.-X.G.2276.	X.A.911.|X.C.2263.-X.G.2277.	AnsA_LnL_RnsR	IC-S-S-LR-LR-SM	IC-S-S-LR-LR-SM	SM	LR	LR	LR	SM	SM	LR	SM	SM	(2,2)	3	3.9(2.6)--pm(>>,forward)								1.9(0.5)--pm(>>,forward)
5dm6.cif1	235	X.A.959.|X.U.2457.-X.G.2494.	X.A.960.|X.C.2456.-X.G.2495.	AnsA_LnsL_RnsR	HC-S-S-LR-LR-SM	HC-S-S-LR-LR-SM	SM	LR	LR	LR	SM	SM	LR	SM	SM	(2,2)	3	5.6(4.0)--pm(>>,forward)				5.1(2.2)--pm(<<,backward)				5.1(3.1)--pm(>>,forward)
5dm6.cif1	236	X.A.980.|X.U.2026.-X.G.2037.	X.A.981.|X.G.2027.-X.C.2036.	AnsA_LnL_RnR_RsL	HC-S-S-LR-LR-SM	HC-S-S-LR-LR-SM	SM	LR	LR	LR	SM	SM	LR	SM	SM	(3,4)	4	7.4(5.5)--pm(>>,forward)							3.9(1.2)--mm(<>,outward)
5dm6.cif1	236	X.A.980.|X.U.2026.-X.G.2037.	X.A.1132.|X.C.2025.-X.G.2038.	LnsL_RnsR	HC-S-S-LR-LR-SM	IP-S-S-LR-LR-SM	LR	LR	LR	LR	SM	SM	LR	SM	SM	(3,4)	4					7.3(4.1)--pm(<<,backward)				5.4(3.4)--pm(>>,forward)
5dm6.cif1	237	X.A.983.|X.G.946.-X.C.971.	X.A.984.|X.G.947.-X.C.970.	AnsA_LnsL_RnsR	HC-S-S-LR-LR-SM	HC-S-S-LR-LR-SM	SM	LR	LR	LR	SM	SM	LR	SM	SM	(2,2)	3	4.2(3.6)--pm(>>,forward)				2.6(1.2)--pm(>>,forward)				0.4(0.1)--pm(<<,backward)
5dm6.cif1	238	X.A.1000.|X.G.976.-X.C.987.	X.A.1001.|X.G.977.-X.C.986.	AnsA_LnsL_RnsR	IC-S-S-LR-LR-SM	IC-S-S-LR-LR-SM	SM	LR	LR	LR	SM	SM	LR	SM	SM	(2,2)	3	7.2(5.3)--pm(>>,forward)				1.6(0.3)--pm(>>,forward)				0.4(0.1)--pm(<<,backward)
5dm6.cif1	239	X.A.1009.|X.G.1002.-X.C.1153.	X.A.1010.|X.G.1003.-X.C.1152.	AnsA_LnsL_RnR	IP-S-S-LR-LR-SM	IP-S-S-LR-LR-SM	SM	LR	LR	LR	SM	SM	LR	SM	SM	(2,2)	3	5.6(4.0)--pm(>>,forward)				3.9(1.9)--pm(>>,forward)
5dm6.cif1	240	X.A.1028.|X.C.2464.-X.G.2486.	X.A.1029.|X.C.2465.-X.G.2485.	AnsA_LnL_RnsR	IP-S-S-LR-LR-SM	IP-S-S-LR-LR-SM	SM	LR	LR	LR	SM	SM	LR	SM	SM	(3,3)	4	2.6(1.7)--pm(>>,forward)								3.2(1.7)--pm(<<,backward)
5dm6.cif1	240	X.A.1028.|X.C.2464.-X.G.2486.	X.A.1127.|X.C.2463.-X.G.2487.	LnL_RnsR	IP-S-S-LR-LR-SM	IP-S-S-LR-LR-SM	SM	LR	LR	LR	SM	SM	LR	SM	SM	(3,3)	4									3.4(1.7)--pm(>>,forward)
5dm6.cif1	241	X.A.1084.|X.A.1054.-X.U.1105.	X.A.1085.|X.G.1055.-X.C.1104.	AnsA_LnsL_RnR	JC-S-S-LC-LC-SM	JC-S-S-LC-LC-SM	SM	LC	LC	LC	SM	SM	LC	SM	SM	(2,2)	3	5.3(3.8)--pm(>>,forward)				2.5(1.7)--pm(>>,forward)
5dm6.cif1	242	X.A.1128.|X.G.2516.-X.C.2568.	X.A.1129.|X.C.2515.-X.G.2569.	AnsA_LnL_LsR_RnsR	IP-S-S-LR-LR-SM	IP-S-S-LR-LR-SM	SM	LR	LR	LR	SM	SM	LR	SM	SM	(2,2)	3	3.2(1.9)--pm(>>,forward)					1.9(0.1)--mm(<>,outward)			1.5(0.7)--pm(>>,forward)
5dm6.cif1	236	X.A.1132.|X.G.2024.-X.C.2039.	X.A.1132.|X.C.2025.-X.G.2038.	AeA_LnsL_RnsR	IP-S-S-LR-LR-SM	IP-S-S-LR-LR-SM	SM	LR	LR	LR	SM	SM	LR	SM	SM	(3,4)	4					7.0(4.4)--pm(>>,forward)				5.9(3.7)--pm(<<,backward)
5dm6.cif1	243	X.A.1225.|X.U.813.-X.A.1194.	X.A.1226.|X.C.812.-X.G.1195.	AnsA_LnL_RnsR	HC-S-S-LR-LR-SM	HC-S-S-LR-LR-SM	SM	LR	LR	LR	SM	SM	LR	SM	SM	(2,2)	3	6.7(4.4)--pm(>>,forward)								4.0(1.6)--pm(>>,forward)
5dm6.cif1	244	X.A.1274.|X.G.1296.-X.C.1644.	X.A.1275.|X.C.1295.-X.G.1645.	AnA_LnsL_LsR_RnR	JC-S-S-LC-LC-SM	JC-S-S-LC-LC-SM	SM	LC	LC	LC	SM	SM	LC	SM	SM	(3,3)	4					0.2(0.1)--pm(<<,backward)	5.5(2.5)--mm(<>,outward)
5dm6.cif1	244	X.A.1274.|X.G.1296.-X.C.1644.	X.A.1302.|X.C.1297.-X.G.1643.	AsA_LnsL_RnsR	JC-S-S-LC-LC-SM	JC-S-S-LC-LC-SM	LR	LC	LC	LC	SM	SM	LC	SM	SM	(3,3)	4	1.3(0.1)--mm(<>,outward)				4.8(2.0)--pm(>>,forward)				4.9(2.2)--pm(<<,backward)
5dm6.cif1	233	X.A.1353.|X.A.693.-X.U.769.	X.A.1354.|X.C.692.-X.G.770.	AnsA_LnsL_LsR_RnsR	IC-S-S-LR-LR-SM	IC-S-S-LR-LR-SM	SM	LR	LR	LR	SM	SM	LR	SM	SM	(3,3)	4	4.0(2.7)--pm(>>,forward)				0.6(0.1)--pm(<<,backward)	2.3(0.7)--mm(<>,outward)			0.5(0.1)--pm(>>,forward)
5dm6.cif1	245	X.A.1392.|X.C.1315.-X.G.1337.	X.A.1393.|X.C.1314.-X.G.1338.	AnsA_LnL_RnsR	HC-S-S-LR-LR-SM	HC-S-S-LR-LR-SM	SM	LR	LR	LR	SM	SM	LR	SM	SM	(2,2)	3	5.2(3.1)--pm(>>,forward)								3.5(2.0)--pm(>>,forward)
5dm6.cif1	246	X.A.1477.|X.C.1435.-X.G.1557.	X.A.1516.|X.G.1436.-X.C.1556.	AsA_LnsL_RnR_RsL	IC-S-S-LR-LR-SM	IC-S-S-LR-LR-SM	SM	LR	LR	LR	SM	SM	LR	SM	SM	(2,2)	4	3.4(1.8)--mm(<>,outward)				0.4(0.1)--pm(>>,forward)			3.3(0.9)--mm(<>,outward)
5dm6.cif1	247	X.A.1528.|X.G.1529.-X.C.1542.	X.A.1544.|X.C.1447.-X.G.1464.	AsA	JCJP-S-S-LC-LC-SM	JCJP-S-S-LC-LC-SM	SM	LC	LC	LC	LR	LR	LC	LR	LR	(3,3)	6	2.9(2.3)--mm(<>,outward)
5dm6.cif1	247	X.A.1544.|X.C.1447.-X.G.1464.	X.A.1545.|X.C.1446.-X.G.1465.	AnsA_LnsL_RnsR	JCJP-S-S-LC-LC-SM	JCJP-S-S-LC-LC-SM	SM	LC	LC	LC	SM	SM	LC	SM	SM	(3,3)	6	5.8(4.1)--pm(>>,forward)				2.0(0.6)--pm(<<,backward)				3.9(2.5)--pm(>>,forward)
5dm6.cif1	248	X.A.1569.|X.C.1351.-X.G.1380.	X.A.1570.|X.C.1351.-X.G.1380.	AnsA_LeL_ReR	ICJP-S-S-LR-LR-SM	ICJP-S-S-LR-LR-SM	SM	LR	LR	LR	SM	SM	LR	SM	SM	(4,2)	3	5.2(3.9)--pm(>>,forward)
5dm6.cif1	248	X.A.1569.|X.C.1351.-X.G.1380.	X.A.1571.|X.C.1351.-X.G.1380.	LeL_ReR	ICJP-S-S-LR-LR-SM	ICJP-S-S-LR-LR-SM	SM	LR	LR	LR	SM	SM	LR	SM	SM	(4,2)	3
5dm6.cif1	248	X.A.1569.|X.C.1351.-X.G.1380.	X.A.1572.|X.C.1350.-X.G.1381.	LnsL_RnsR	ICJP-S-S-LR-LR-SM	ICJP-S-S-LR-LR-SM	SM	LR	LR	LR	SM	SM	LR	SM	SM	(4,2)	3					0.7(0.2)--pm(<<,backward)				1.7(0.4)--pm(>>,forward)
5dm6.cif1	248	X.A.1570.|X.C.1351.-X.G.1380.	X.A.1571.|X.C.1351.-X.G.1380.	AnsA_LeL_ReR	ICJP-S-S-LR-LR-SM	ICJP-S-S-LR-LR-SM	SM	LR	LR	LR	SM	SM	LR	SM	SM	(4,2)	3	5.9(4.2)--pm(>>,forward)
5dm6.cif1	248	X.A.1570.|X.C.1351.-X.G.1380.	X.A.1572.|X.C.1350.-X.G.1381.	LnsL_RnsR	ICJP-S-S-LR-LR-SM	ICJP-S-S-LR-LR-SM	SM	LR	LR	LR	SM	SM	LR	SM	SM	(4,2)	3					0.7(0.2)--pm(<<,backward)				1.7(0.4)--pm(>>,forward)
5dm6.cif1	248	X.A.1571.|X.C.1351.-X.G.1380.	X.A.1572.|X.C.1350.-X.G.1381.	AnsA_LnsL_RnsR	ICJP-S-S-LR-LR-SM	ICJP-S-S-LR-LR-SM	SM	LR	LR	LR	SM	SM	LR	SM	SM	(4,2)	3	2.5(2.1)--pm(>>,forward)				0.7(0.2)--pm(<<,backward)				1.7(0.4)--pm(>>,forward)
5dm6.cif1	249	X.A.1785.|X.G.2588.-X.C.2606.	X.A.1938.|X.A.2589.-X.U.2605.	LnsL_RnR	JC-S-S-LR-LR-SM	JC-S-S-LR-LR-SM	LR	LR	LR	LR	SM	SM	LR	SM	SM	(2,2)	4					5.8(4.0)--pm(>>,forward)
5dm6.cif1	250	X.A.1802.|X.U.1798.-X.A.1821.	X.A.1803.|X.C.1797.-X.G.1822.	AnsA_LnsL_RnsR	IC-S-S-LC-LC-SM	IC-S-S-LC-LC-SM	SM	LC	LC	LC	SM	SM	LC	SM	SM	(2,2)	3	4.6(3.3)--pm(>>,forward)				1.0(0.4)--pm(<<,backward)				2.7(2.6)--pm(>>,forward)
5dm6.cif1	251	X.A.1808.|X.C.1363.-X.G.1368.	X.A.1809.|X.C.1362.-X.G.1369.	AnA_LnL_RnsR	HC-S-S-LR-LR-SM	HC-S-S-LR-LR-SM	SM	LR	LR	LR	SM	SM	LR	SM	SM	(3,2)	3									1.7(0.4)--pm(>>,forward)
5dm6.cif1	251	X.A.1808.|X.C.1363.-X.G.1368.	X.A.1810.|X.C.1362.-X.G.1369.	LnL_RnsR	HC-S-S-LR-LR-SM	HC-S-S-LR-LR-SM	SM	LR	LR	LR	SM	SM	LR	SM	SM	(3,2)	3									1.7(0.4)--pm(>>,forward)
5dm6.cif1	251	X.A.1809.|X.C.1362.-X.G.1369.	X.A.1810.|X.C.1362.-X.G.1369.	AsA_LeL_ReR	HC-S-S-LR-LR-SM	HC-S-S-LR-LR-SM	SM	LR	LR	LR	SM	SM	LR	SM	SM	(3,2)	3	4.4(2.9)--pm(>>,forward)
5dm6.cif1	252	X.A.1853.|X.U.2086.-X.U.2233.	X.A.1854.|X.G.2087.-X.U.2232.	AnsA_LnL_RnR_RsL	IC-IC-IC-LR-LR-SM	IC-S-S-LR-LR-SM	SM	LR	LR	LR	LC	LC	LR	LC	LC	(4,3)	8	2.9(2.3)--pm(>>,forward)							3.3(0.4)--mm(<>,outward)
5dm6.cif1	252	X.A.1853.|X.U.2086.-X.U.2233.	X.A.1889.|X.U.2086.-X.U.2233.	AsA_LeL_ReR	IC-IC-IC-LR-LR-SM	IC-IC-IC-LR-LR-SM	SM	LR	LR	LR	SM	SM	LR	SM	SM	(4,3)	8	5.8(2.9)--mm(<>,outward)
5dm6.cif1	252	X.A.1853.|X.U.2086.-X.U.2233.	X.A.1890.|X.C.2085.-X.G.2234.	LnsL_RnsR	IC-IC-IC-LR-LR-SM	IC-S-S-LR-LR-SM	SM	LR	LR	LR	LC	LC	LR	LC	LC	(4,3)	8					2.9(1.2)--pm(<<,backward)				1.9(0.4)--pm(>>,forward)
5dm6.cif1	252	X.A.1854.|X.G.2087.-X.U.2232.	X.A.1889.|X.U.2086.-X.U.2233.	LnL_LsR_RnR	IC-S-S-LR-LR-SM	IC-IC-IC-LR-LR-SM	SM	LR	LR	LR	LC	LC	LR	LC	LC	(4,3)	8						3.3(0.4)--mm(<>,outward)
5dm6.cif1	252	X.A.1889.|X.U.2086.-X.U.2233.	X.A.1890.|X.C.2085.-X.G.2234.	AnsA_LnsL_RnsR	IC-IC-IC-LR-LR-SM	IC-S-S-LR-LR-SM	SM	LR	LR	LR	LC	LC	LR	LC	LC	(4,3)	8	7.3(5.4)--pm(>>,forward)				2.9(1.2)--pm(<<,backward)				1.9(0.4)--pm(>>,forward)
5dm6.cif1	253	X.A.1927.|X.C.1837.-X.G.1903.	X.A.1928.|X.C.1836.-X.G.1904.	AnsA_LnsL_RnsR	JC-S-S-LC-LC-SM	JC-S-S-LC-LC-SM	SM	LC	LC	LC	SM	SM	LC	SM	SM	(2,2)	3	7.4(5.6)--pm(>>,forward)				2.5(1.0)--pm(<<,backward)				1.7(0.4)--pm(>>,forward)
5dm6.cif1	254	X.A.1952.|X.G.2548.-X.C.2560.	X.A.1953.|X.G.2549.-X.C.2559.	AnsA_LnsL_RnR	HC-S-S-LR-LR-SM	HC-S-S-LR-LR-SM	SM	LR	LR	LR	SM	SM	LR	SM	SM	(2,2)	3	6.6(4.6)--pm(>>,forward)				4.1(2.1)--pm(>>,forward)
5dm6.cif1	255	X.A.2273.|X.A.953.-X.C.964.	X.A.2274.|X.G.954.-X.U.963.	AnsA_LnsL_RnR	HC-IC-IC-LR-LR-SM	HC-S-S-LR-LR-SM	SM	LR	LR	LR	LC	LC	LR	LC	LC	(2,2)	5	1.7(1.3)--pm(>>,forward)				3.4(2.9)--pm(>>,forward)
5dm6.cif1	256	X.A.2327.|X.C.2261.-X.G.2279.	X.A.2388.|X.C.2260.-X.G.2280.	AsA_LnL_RnsR	IP-S-S-LR-LR-SM	JIJP-S-S-LC-LC-SM	LR	LR	LR	LC	SM	SM	LC	SM	SM	(2,2)	4	1.7(0.4)--mm(<>,outward)								2.8(1.3)--pm(>>,forward)
5dm6.cif1	257	X.A.2564.|X.C.2521.-X.G.2544.	X.A.2565.|X.C.2520.-X.G.2545.	AnsA_LnL_RnsR	JC-S-S-LC-LC-SM	JC-S-S-LC-LC-SM	SM	LC	LC	LC	SM	SM	LC	SM	SM	(2,2)	3	6.1(4.2)--pm(>>,forward)								3.1(1.6)--pm(>>,forward)
5dm6.cif1	258	X.A.2740.|X.G.2523.-X.C.2540.	X.A.2741.|X.G.2524.-X.C.2539.	AnsA_LnsL_RnR	IC-S-S-LR-LR-SM	IC-S-S-LR-LR-SM	SM	LR	LR	LR	SM	SM	LR	SM	SM	(2,2)	3	7.1(5.2)--pm(>>,forward)				1.8(0.5)--pm(>>,forward)
5dm6.cif1	259	X.A.2809.|X.G.2630.-X.C.2788.	X.A.2810.|X.G.2631.-X.C.2787.	AnsA_LnsL_RnR	JI-S-S-LC-LC-SM	JI-S-S-LC-LC-SM	SM	LC	LC	LC	SM	SM	LC	SM	SM	(3,2)	4	7.0(5.0)--pm(>>,forward)				4.5(2.3)--pm(>>,forward)
5dm6.cif1	259	X.A.2809.|X.G.2630.-X.C.2788.	X.A.2891.|X.G.2630.-X.C.2788.	AsA_LeL_ReR	JI-S-S-LC-LC-SM	JI-S-S-LC-LC-SM	SM	LC	LC	LC	SM	SM	LC	SM	SM	(3,2)	4	3.9(2.9)--mm(<>,outward)
5dm6.cif1	259	X.A.2810.|X.G.2631.-X.C.2787.	X.A.2891.|X.G.2630.-X.C.2788.	LnsL_RnR	JI-S-S-LC-LC-SM	JI-S-S-LC-LC-SM	SM	LC	LC	LC	SM	SM	LC	SM	SM	(3,2)	4					4.5(2.3)--pm(<<,backward)
5dm6.cif1	260	X.A.2859.|X.C.1729.-X.G.1743.	X.A.2860.|X.C.1728.-X.G.1744.	AnsA_LnsL_RnsR	HC-S-S-LR-LR-SM	HC-S-S-LR-LR-SM	SM	LR	LR	LR	SM	SM	LR	SM	SM	(2,2)	3	7.7(5.8)--pm(>>,forward)				4.2(1.5)--pm(<<,backward)				4.2(2.6)--pm(>>,forward)
5dm6.cif1	261	Y.A.59.|Y.C.32.-Y.G.56.	Y.A.60.|Y.A.31.-Y.U.57.	AnsA_LnsL_RnsR	IC-S-S-LC-LC-SM	IC-S-S-LC-LC-SM	SM	LC	LC	LC	SM	SM	LC	SM	SM	(3,3)	3	4.5(1.8)--pm(>>,forward)				5.1(3.7)--pm(<<,backward)				7.2(4.4)--pm(>>,forward)
5dm6.cif1	261	Y.A.60.|Y.A.31.-Y.U.57.	Y.A.61.|Y.C.30.-Y.G.58.	AnsA_LnL_LsR_RnsR	IC-S-S-LC-LC-SM	IC-S-S-LC-LC-SM	SM	LC	LC	LC	SM	SM	LC	SM	SM	(3,3)	3	5.0(2.2)--pm(>>,forward)					1.2(0.5)--mm(<>,outward)			0.9(0.1)--pm(>>,forward)
5e81.cif1	262	13.A.1492.|1K.U.35.-4K.A.20.	13.A.1493.|1K.U.36.-4K.A.19.	AnsA_LnsL_RnR	IC-S-S-LR-LR-SM	IC-S-S-LR-LR-SM	SM	LR	LR	LR	SM	SM	LR	SM	SM	(2,2)	3	4.2(1.4)--pm(>>,forward)				0.7(0.2)--pm(>>,forward)
5fdv.cif1	263	1B.A.53.|1B.C.31.-1B.G.51.	1B.A.57.|1B.C.30.-1B.G.54.	AnsR_LnsL	BC-S-S-LC-LC-SM	IC-S-S-LC-LC-SM	LR	LC	LC	LR	LR	LR	LR	LR	LR	(4,4)	6			2.5(2.1)--pm(>>,forward)		2.9(0.5)--pm(<<,backward)
5fdv.cif1	263	1B.A.57.|1B.A.29.-1B.U.55.	1B.A.57.|1B.C.30.-1B.G.54.	AeA_LnsL_RnsR	IC-S-S-LC-LC-SM	IC-S-S-LC-LC-SM	SM	LC	LC	LC	SM	SM	LC	SM	SM	(4,4)	6					5.2(3.7)--pm(>>,forward)				5.3(2.5)--pm(<<,backward)
5fdv.cif1	263	1B.A.57.|1B.A.29.-1B.U.55.	1B.A.58.|1B.A.29.-1B.U.55.	AnA_LeL_ReR	IC-S-S-LC-LC-SM	IC-S-S-LC-LC-SM	SM	LC	LC	LC	SM	SM	LC	SM	SM	(4,4)	6
5fdv.cif1	263	1B.A.57.|1B.A.29.-1B.U.55.	1B.A.59.|1B.C.28.-1B.G.56.	AnR_LnsL_LsR_RnR	IC-S-S-LC-LC-SM	IC-S-S-LC-LC-SM	SM	LC	LC	LC	SM	SM	LC	SM	SM	(4,4)	6					0.5(0.1)--pm(<<,backward)	1.4(0.7)--mm(<>,outward)
5fdv.cif1	263	1B.A.57.|1B.C.30.-1B.G.54.	1B.A.58.|1B.A.29.-1B.U.55.	AnA_LnsL_RnsR	IC-S-S-LC-LC-SM	IC-S-S-LC-LC-SM	SM	LC	LC	LC	SM	SM	LC	SM	SM	(4,4)	6					5.2(3.7)--pm(<<,backward)				5.3(2.5)--pm(>>,forward)
5fdv.cif1	263	1B.A.58.|1B.A.29.-1B.U.55.	1B.A.59.|1B.C.28.-1B.G.56.	AnsA_LnsL_LsR_RnR	IC-S-S-LC-LC-SM	IC-S-S-LC-LC-SM	SM	LC	LC	LC	SM	SM	LC	SM	SM	(4,4)	6	4.4(1.5)--pm(>>,forward)				0.5(0.1)--pm(<<,backward)	1.4(0.7)--mm(<>,outward)
5fjc.cif1	264	A.A.61.|A.U.22.-A.G.30.	A.A.62.|A.G.23.-A.C.29.	AnsA_LnL_RnR_RsL	IP-S-S-LC-LC-SM	IP-S-S-LC-LC-SM	SM	LC	LC	LC	SM	SM	LC	SM	SM	(2,2)	3	5.9(3.3)--pm(>>,forward)							6.1(3.4)--mm(<>,outward)
5ibb.cif1	265	1G.A.1492.|1L.A.35.-4L.U.20.	1G.A.1493.|1L.C.36.-4L.G.19.	AnsA_LnsL_RnsR	IC-S-S-LR-LR-SM	IC-S-S-LR-LR-SM	SM	LR	LR	LR	SM	SM	LR	SM	SM	(2,2)	3	4.7(2.1)--pm(>>,forward)				6.3(1.6)--pm(>>,forward)				2.4(0.7)--pm(<<,backward)
5j7l.cif1	266	AA.A.2.|AA.C.613.-AA.G.627.	AA.A.3.|AA.C.612.-AA.G.628.	AnsA_LnL_RnsR	JI-S-S-LR-LR-SM	JI-S-S-LR-LR-SM	SM	LR	LR	LR	SM	SM	LR	SM	SM	(2,2)	3	6.7(4.7)--pm(>>,forward)								4.8(3.1)--pm(>>,forward)
5j7l.cif1	267	AA.A.51.|AA.G.113.-AA.C.314.	AA.A.51.|AA.U.114.-AA.A.313.	AeA_LnsL_RnsR	JC-S-S-LR-LR-SM	JC-S-S-LR-LR-SM	SM	LR	LR	LR	SM	SM	LR	SM	SM	(3,2)	5					7.2(4.1)--pm(>>,forward)				4.4(3.0)--pm(<<,backward)
5j7l.cif1	267	AA.A.51.|AA.G.113.-AA.C.314.	AA.A.116.|AA.U.114.-AA.A.313.	AsA_LnsL_RnsR	JC-S-S-LR-LR-SM	JC-S-S-LC-LC-SM	LR	LR	LR	LC	SM	SM	LC	SM	SM	(3,2)	5	3.6(0.6)--pm(>>,forward)				7.2(4.1)--pm(>>,forward)				4.4(3.0)--pm(<<,backward)
5j7l.cif1	267	AA.A.51.|AA.G.113.-AA.C.314.	AA.A.353.|AA.G.113.-AA.C.314.	AsA_LeL_ReR	JC-S-S-LR-LR-SM	JC-S-S-LC-LC-SM	LR	LR	LR	LC	SM	SM	LC	SM	SM	(3,2)	5	7.6(6.4)--mm(<>,outward)
5j7l.cif1	267	AA.A.51.|AA.U.114.-AA.A.313.	AA.A.116.|AA.U.114.-AA.A.313.	AsA_LeL_ReR	JC-S-S-LR-LR-SM	JC-S-S-LC-LC-SM	LR	LR	LR	LC	SM	SM	LC	SM	SM	(3,2)	5	3.6(0.6)--pm(>>,forward)
5j7l.cif1	267	AA.A.51.|AA.U.114.-AA.A.313.	AA.A.353.|AA.G.113.-AA.C.314.	AsA_LnsL_RnsR	JC-S-S-LR-LR-SM	JC-S-S-LC-LC-SM	LR	LR	LR	LC	SM	SM	LC	SM	SM	(3,2)	5	7.6(6.4)--mm(<>,outward)				7.2(4.1)--pm(<<,backward)				4.4(3.0)--pm(>>,forward)
5j7l.cif1	268	AA.A.71.|AA.G.69.-AA.C.99.	AA.A.71.|AA.U.70.-AA.A.98.	AeA_AnL_LnsL_RnsR	BC-S-S-LC-LC-SM	BC-S-S-LC-LC-SM	SM	LC	LC	LC	SM	SM	LC	SM	SM	(2,2)	3					5.2(2.6)--pm(>>,forward)				5.3(3.9)--pm(<<,backward)
5j7l.cif1	268	AA.A.71.|AA.G.69.-AA.C.99.	AA.A.72.|AA.U.70.-AA.A.98.	AnL_AnsA_LnsL_RnsR	BC-S-S-LC-LC-SM	BC-S-S-LC-LC-SM	SM	LC	LC	LC	SM	SM	LC	SM	SM	(2,2)	3	0.7(0.6)--pm(>>,forward)				5.2(2.6)--pm(>>,forward)				5.3(3.9)--pm(<<,backward)
5j7l.cif1	268	AA.A.71.|AA.U.70.-AA.A.98.	AA.A.72.|AA.U.70.-AA.A.98.	AnL_AnsA_LeL_ReR	BC-S-S-LC-LC-SM	BC-S-S-LC-LC-SM	SM	LC	LC	LC	SM	SM	LC	SM	SM	(2,2)	3	0.7(0.6)--pm(>>,forward)
5j7l.cif1	267	AA.A.116.|AA.U.114.-AA.A.313.	AA.A.353.|AA.G.113.-AA.C.314.	LnsL_RnsR	JC-S-S-LC-LC-SM	JC-S-S-LC-LC-SM	LR	LC	LC	LC	SM	SM	LC	SM	SM	(3,2)	5					7.2(4.1)--pm(<<,backward)				4.4(3.0)--pm(>>,forward)
5j7l.cif1	269	AA.A.151.|AA.C.67.-AA.G.102.	AA.A.171.|AA.C.67.-AA.G.102.	LeL_ReR	IC-S-S-LR-LR-SM	IC-S-S-LR-LR-SM	SM	LR	LR	LR	SM	SM	LR	SM	SM	(5,4)	7
5j7l.cif1	269	AA.A.151.|AA.C.67.-AA.G.102.	AA.A.172.|AA.A.66.-AA.U.103.	LnsL_RnsR	IC-S-S-LR-LR-SM	IC-S-S-LR-LR-SM	SM	LR	LR	LR	SM	SM	LR	SM	SM	(5,4)	7					2.8(1.5)--pm(<<,backward)				3.5(1.4)--pm(>>,forward)
5j7l.cif1	270	AA.A.160.|AA.C.342.-AA.G.347.	AA.A.161.|AA.C.342.-AA.G.347.	AnsA_LeL_ReR	HC-S-S-LR-LR-SM	HC-S-S-LR-LR-SM	SM	LR	LR	LR	SM	SM	LR	SM	SM	(2,1)	3	6.2(3.7)--pm(>>,forward)
5j7l.cif1	269	AA.A.171.|AA.C.67.-AA.G.102.	AA.A.172.|AA.A.66.-AA.U.103.	AnsA_LnsL_RnsR	IC-S-S-LR-LR-SM	IC-S-S-LR-LR-SM	SM	LR	LR	LR	SM	SM	LR	SM	SM	(5,4)	7	5.9(4.3)--pm(>>,forward)				2.8(1.5)--pm(<<,backward)				3.5(1.4)--pm(>>,forward)
5j7l.cif1	269	AA.A.172.|AA.A.66.-AA.U.103.	AA.A.1446.|AA.G.148.-AA.A.174.	AsR	IC-S-S-LR-LR-SM	IC-IC-IC-LR-LR-SM	LR	SM	SM	LR	LR	LR	LR	LR	LR	(5,4)	7			1.8(0.2)--pm(>>,forward)
5j7l.cif1	271	AA.A.195.|AA.G.141.-AA.C.222.	AA.A.196.|AA.G.142.-AA.C.221.	AnsA_LnsL_RnR	JC-S-S-LC-LC-SM	JC-S-S-LC-LC-SM	SM	LC	LC	LC	SM	SM	LC	SM	SM	(2,2)	3	6.8(4.7)--pm(>>,forward)				3.6(2.0)--pm(>>,forward)
5j7l.cif1	272	AA.A.373.|AA.C.370.-AA.G.391.	AA.A.374.|AA.A.371.-AA.U.390.	AnsA_LnL_RnsR_RsL	IC-S-S-LC-LC-SM	IC-S-S-LC-LC-SM	SM	LC	LC	LC	SM	SM	LC	SM	SM	(3,2)	4	0.5(0.5)--pm(>>,forward)							2.0(1.1)--mm(<>,outward)	1.0(0.1)--pm(<<,backward)
5j7l.cif1	272	AA.A.373.|AA.C.370.-AA.G.391.	AA.A.482.|AA.C.370.-AA.G.391.	AsA_LeL_ReR	IC-S-S-LC-LC-SM	IC-S-S-LR-LR-SM	LR	LC	LC	LR	SM	SM	LR	SM	SM	(3,2)	4	6.7(5.5)--mm(<>,outward)
5j7l.cif1	272	AA.A.374.|AA.A.371.-AA.U.390.	AA.A.482.|AA.C.370.-AA.G.391.	LnL_LsR_RnsR	IC-S-S-LC-LC-SM	IC-S-S-LR-LR-SM	LR	LC	LC	LR	SM	SM	LR	SM	SM	(3,2)	4						2.0(1.1)--mm(<>,outward)			1.0(0.1)--pm(>>,forward)
5j7l.cif1	273	AA.A.509.|AA.A.502.-AA.U.543.	AA.A.510.|AA.C.503.-AA.G.542.	AnsA_LnsL_RnsR	HP-S-S-LR-LR-SM	HP-S-S-LR-LR-SM	SM	LR	LR	LR	SM	SM	LR	SM	SM	(2,2)	3	5.9(3.6)--pm(>>,forward)				6.3(4.0)--pm(>>,forward)				4.0(1.8)--pm(<<,backward)
5j7l.cif1	274	AA.A.572.|AA.A.19.-AA.U.916.	AA.A.864.|AA.C.18.-AA.G.917.	AsA_LnsL_LsR_RnR	JP-S-S-LR-LR-SM	HPJP-S-S-LR-LR-SM	SM	LR	LR	LR	SM	SM	LR	SM	SM	(2,2)	4	1.6(0.3)--mm(<>,outward)				0.5(0.1)--pm(<<,backward)	2.7(1.7)--mm(<>,outward)
5j7l.cif1	275	AA.A.573.|AA.G.567.-AA.C.883.	AA.A.574.|AA.G.568.-AA.C.882.	AnsA_LnsL_RnR	JP-S-S-LR-LR-SM	JP-S-S-LR-LR-SM	SM	LR	LR	LR	SM	SM	LR	SM	SM	(2,2)	3	5.5(3.1)--pm(>>,forward)				4.7(2.5)--pm(>>,forward)
5j7l.cif1	276	AA.A.607.|AA.U.291.-AA.A.309.	AA.A.608.|AA.G.292.-AA.C.308.	AnsA_LnL_RnR_RsL	IC-S-S-LR-LR-SM	IC-S-S-LR-LR-SM	SM	LR	LR	LR	SM	SM	LR	SM	SM	(2,2)	3	5.5(4.1)--pm(>>,forward)							3.8(1.9)--mm(<>,outward)
5j7l.cif1	277	AA.A.621.|AA.G.41.-AA.C.401.	AA.A.622.|AA.G.42.-AA.C.400.	AnsA_LnsL_RnsR	HC-S-S-LR-LR-SM	HC-S-S-LR-LR-SM	SM	LR	LR	LR	SM	SM	LR	SM	SM	(2,2)	3	6.9(5.0)--pm(>>,forward)				3.0(1.4)--pm(>>,forward)				2.4(0.9)--pm(<<,backward)
5j7l.cif1	278	AA.A.695.|AA.G.786.-AA.C.796.	AA.A.696.|AA.G.785.-AA.C.797.	AnsA_LnsL_RnsR	HC-S-S-LR-LR-SM	HC-S-S-LR-LR-SM	SM	LR	LR	LR	SM	SM	LR	SM	SM	(2,2)	3	6.7(4.9)--pm(>>,forward)				2.9(1.4)--pm(<<,backward)				0.4(0.1)--pm(>>,forward)
5j7l.cif1	279	AA.A.728.|AA.C.578.-AA.G.763.	AA.A.729.|AA.G.577.-AA.C.764.	AnsA_LnsL_RnsR	HC-S-S-LR-LR-SM	HC-S-S-LR-LR-SM	SM	LR	LR	LR	SM	SM	LR	SM	SM	(2,2)	3	5.2(3.7)--pm(>>,forward)				5.8(2.9)--pm(<<,backward)				7.2(4.1)--pm(>>,forward)
5j7l.cif1	280	AA.A.766.|AA.C.1510.-AA.G.1525.	AA.A.767.|AA.G.1511.-AA.C.1524.	AnsA_LnL_RnsR_RsL	JP-S-S-LR-LR-SM	JP-S-S-LR-LR-SM	SM	LR	LR	LR	SM	SM	LR	SM	SM	(2,2)	3	4.1(1.5)--pm(>>,forward)							2.7(0.3)--mm(<>,outward)	1.5(0.2)--pm(<<,backward)
5j7l.cif1	281	AA.A.958.|AA.C.985.-AA.G.1220.	AA.A.959.|AA.C.984.-AA.G.1221.	AnsA_LnsL_RnsR	JC-S-S-LC-LC-SM	JC-S-S-LC-LC-SM	SM	LC	LC	LC	SM	SM	LC	SM	SM	(2,2)	3	7.3(5.4)--pm(>>,forward)				3.1(1.1)--pm(<<,backward)				4.3(3.0)--pm(>>,forward)
5j7l.cif1	282	AA.A.1167.|AA.G.1088.-AA.C.1097.	AA.A.1169.|AA.G.1088.-AA.C.1097.	LeL_ReR	HC-S-S-LR-LR-SM	HC-S-S-LR-LR-SM	SM	LR	LR	LR	SM	SM	LR	SM	SM	(3,2)	3
5j7l.cif1	282	AA.A.1167.|AA.G.1088.-AA.C.1097.	AA.A.1170.|AA.G.1089.-AA.C.1096.	LnsL_RnsR	HC-S-S-LR-LR-SM	HC-S-S-LR-LR-SM	SM	LR	LR	LR	SM	SM	LR	SM	SM	(3,2)	3					4.6(3.1)--pm(>>,forward)				1.1(0.1)--pm(<<,backward)
5j7l.cif1	282	AA.A.1169.|AA.G.1088.-AA.C.1097.	AA.A.1170.|AA.G.1089.-AA.C.1096.	AnsA_LnsL_RnsR	HC-S-S-LR-LR-SM	HC-S-S-LR-LR-SM	SM	LR	LR	LR	SM	SM	LR	SM	SM	(3,2)	3	5.9(4.3)--pm(>>,forward)				4.6(3.1)--pm(>>,forward)				1.1(0.1)--pm(<<,backward)
5j7l.cif1	283	AA.A.1251.|AA.G.1353.-AA.C.1369.	AA.A.1251.|AA.U.1354.-AA.A.1368.	AeA_LnsL_RnsR	IC-S-S-LR-LR-SM	IC-S-S-LR-LR-SM	SM	LR	LR	LR	SM	SM	LR	SM	SM	(3,3)	4					4.8(2.2)--pm(>>,forward)				2.3(1.4)--pm(<<,backward)
5j7l.cif1	283	AA.A.1251.|AA.G.1353.-AA.C.1369.	AA.A.1287.|AA.C.1352.-AA.G.1370.	LnsL_RnR	IC-S-S-LR-LR-SM	IC-S-S-LR-LR-SM	SM	LR	LR	LR	SM	SM	LR	SM	SM	(3,3)	4					1.5(0.3)--pm(<<,backward)
5j7l.cif1	283	AA.A.1251.|AA.G.1353.-AA.C.1369.	AA.A.1288.|AA.C.1352.-AA.G.1370.	LnsL_RnR	IC-S-S-LR-LR-SM	IC-S-S-LR-LR-SM	SM	LR	LR	LR	SM	SM	LR	SM	SM	(3,3)	4					1.5(0.3)--pm(<<,backward)
5j7l.cif1	283	AA.A.1287.|AA.C.1352.-AA.G.1370.	AA.A.1288.|AA.C.1352.-AA.G.1370.	AnsA_LeL_ReR	IC-S-S-LR-LR-SM	IC-S-S-LR-LR-SM	SM	LR	LR	LR	SM	SM	LR	SM	SM	(3,3)	4	6.1(4.3)--pm(>>,forward)
5j7l.cif1	284	AA.A.1418.|DA.G.1948.-DA.C.1958.	AA.A.1483.|DA.C.1947.-DA.G.1959.	AsA_LnL_LsR_RnR	IC-S-S-LR-LR-SM	IC-S-S-LR-LR-SM	SM	LR	LR	LR	SM	SM	LR	SM	SM	(2,2)	4	4.4(2.8)--mm(<>,outward)					5.5(2.6)--mm(<>,outward)
5j7l.cif1	285	AA.A.1433.|AA.G.318.-AA.C.335.	AA.A.1434.|AA.G.319.-AA.C.334.	AnsA_LnsL_RnR	IC-S-S-LR-LR-SM	IC-S-S-LR-LR-SM	SM	LR	LR	LR	SM	SM	LR	SM	SM	(2,2)	3	6.4(4.2)--pm(>>,forward)				4.2(2.5)--pm(>>,forward)
5j7l.cif1	269	AA.A.1446.|AA.G.148.-AA.A.174.	AA.A.1447.|AA.G.147.-AA.C.175.	AnsA_LnsL_RnsR	IC-IC-IC-LR-LR-SM	IC-S-S-LR-LR-SM	SM	LR	LR	LR	LC	LC	LR	LC	LC	(5,4)	7	3.8(3.5)--pm(>>,forward)				3.0(1.1)--pm(<<,backward)				5.8(3.6)--pm(>>,forward)
5j7l.cif1	286	AA.MA6.1518.|AA.C.1404.-AA.G.1497.	AA.MA6.1519.|AA.C.1404.-AA.G.1497.	AnsA_LeL_ReR	HC-S-S-LR-LR-SM	HC-S-S-LR-LR-SM	SM	LR	LR	LR	SM	SM	LR	SM	SM	(2,1)	3	3.3(2.6)--pm(>>,forward)
5j7l.cif1	287	DB.A.53.|DB.C.31.-DB.G.51.	DB.A.57.|DB.C.30.-DB.G.54.	AnsR_LnsL	BC-S-S-LC-LC-SM	IC-S-S-LC-LC-SM	LR	LC	LC	LR	LR	LR	LR	LR	LR	(4,4)	6			2.2(1.8)--pm(>>,forward)		2.8(0.2)--pm(<<,backward)
5j7l.cif1	287	DB.A.57.|DB.A.29.-DB.U.55.	DB.A.57.|DB.C.30.-DB.G.54.	AeA_LnsL_RnsR	IC-S-S-LC-LC-SM	IC-S-S-LC-LC-SM	SM	LC	LC	LC	SM	SM	LC	SM	SM	(4,4)	6					5.8(4.2)--pm(>>,forward)				6.6(3.5)--pm(<<,backward)
5j7l.cif1	287	DB.A.57.|DB.A.29.-DB.U.55.	DB.A.58.|DB.A.29.-DB.U.55.	AnsA_LeL_ReR	IC-S-S-LC-LC-SM	IC-S-S-LC-LC-SM	SM	LC	LC	LC	SM	SM	LC	SM	SM	(4,4)	6	4.8(3.7)--pm(>>,forward)
5j7l.cif1	287	DB.A.57.|DB.A.29.-DB.U.55.	DB.A.59.|DB.C.28.-DB.G.56.	AnR_LnsL_LsR_RnR	IC-S-S-LC-LC-SM	IC-S-S-LC-LC-SM	SM	LC	LC	LC	SM	SM	LC	SM	SM	(4,4)	6					0.6(0.1)--pm(<<,backward)	1.7(0.9)--mm(<>,outward)
5j7l.cif1	287	DB.A.57.|DB.C.30.-DB.G.54.	DB.A.58.|DB.A.29.-DB.U.55.	AnsA_LnsL_RnsR	IC-S-S-LC-LC-SM	IC-S-S-LC-LC-SM	SM	LC	LC	LC	SM	SM	LC	SM	SM	(4,4)	6	4.8(3.7)--pm(>>,forward)				5.8(4.2)--pm(<<,backward)				6.6(3.5)--pm(>>,forward)
5j7l.cif1	287	DB.A.58.|DB.A.29.-DB.U.55.	DB.A.59.|DB.C.28.-DB.G.56.	AnsA_LnsL_LsR_RnR	IC-S-S-LC-LC-SM	IC-S-S-LC-LC-SM	SM	LC	LC	LC	SM	SM	LC	SM	SM	(4,4)	6	5.8(3.0)--pm(>>,forward)				0.6(0.1)--pm(<<,backward)	1.7(0.9)--mm(<>,outward)
5j7l.cif1	288	DA.A.14.|DA.C.2044.-DA.G.2624.	DA.A.526.|DA.C.2043.-DA.G.2625.	AsA_LnL_RnsR	JI-S-S-LR-LR-SM	JP-S-S-LC-LC-SM	LR	LR	LR	LC	SM	SM	LC	SM	SM	(2,2)	4	1.3(0.1)--mm(<>,outward)								3.8(1.9)--pm(>>,forward)
5j7l.cif1	289	DA.A.71.|DA.C.57.-DA.G.70.	DA.A.73.|DA.G.58.-DA.C.69.	AsA_LnsL_RnR_RsL	HP-S-S-LC-LC-SM	HP-S-S-LC-LC-SM	SM	LC	LC	LC	SM	SM	LC	SM	SM	(2,2)	3	1.6(0.6)--pm(>>,forward)				0.6(0.2)--pm(>>,forward)			2.6(0.5)--mm(<>,outward)
5j7l.cif1	290	DA.A.126.|DA.G.54.-DA.C.116.	DA.A.127.|DA.G.55.-DA.C.115.	AnsA_LnsL_RnR	HC-S-S-LR-LR-SM	HC-S-S-LR-LR-SM	SM	LR	LR	LR	SM	SM	LR	SM	SM	(2,2)	3	5.7(3.6)--pm(>>,forward)				3.9(1.6)--pm(>>,forward)
5j7l.cif1	291	DA.A.160.|DA.C.2208.-DA.G.2216.	DA.A.161.|DA.C.2207.-DA.G.2217.	AnsA_LnsL_RnsR	HC-S-S-LR-LR-SM	HC-S-S-LR-LR-SM	SM	LR	LR	LR	SM	SM	LR	SM	SM	(2,2)	3	5.0(3.9)--pm(>>,forward)				0.7(0.1)--pm(<<,backward)				4.1(2.7)--pm(>>,forward)
5j7l.cif1	292	DA.A.181.|DA.G.45.-DA.C.433.	DA.A.182.|DA.G.45.-DA.C.433.	AnsA_LeL_ReR	JC-S-S-LC-LC-SM	JC-S-S-LC-LC-SM	SM	LC	LC	LC	SM	SM	LC	SM	SM	(3,2)	5	5.5(4.0)--pm(>>,forward)
5j7l.cif1	292	DA.A.181.|DA.G.45.-DA.C.433.	DA.A.432.|DA.C.183.-DA.G.214.	RnsA	JC-S-S-LC-LC-SM	JCJP-JC-JC-SM-SM-SM	SM	SM	SM	LC	LC	LC	LC	LC	LC	(3,2)	5							5.8(3.9)--pm(<<,backward)
5j7l.cif1	292	DA.A.182.|DA.G.45.-DA.C.433.	DA.A.432.|DA.C.183.-DA.G.214.	AnsL_RnsA	JC-S-S-LC-LC-SM	JCJP-JC-JC-SM-SM-SM	SM	SM	SM	LC	LC	LC	LC	LC	LC	(3,2)	5		5.6(4.4)--pm(>>,forward)					5.8(3.9)--pm(<<,backward)
5j7l.cif1	293	DA.A.190.|DA.C.678.-DA.G.799.	DA.A.190.|DA.C.679.-DA.G.798.	AeA_LnsL_RnsR	HC-S-S-LR-LR-SM	HC-S-S-LR-LR-SM	SM	LR	LR	LR	SM	SM	LR	SM	SM	(2,2)	3					1.1(0.3)--pm(>>,forward)				3.0(1.4)--pm(<<,backward)
5j7l.cif1	293	DA.A.190.|DA.C.678.-DA.G.799.	DA.A.191.|DA.C.678.-DA.G.799.	AnsA_LeL_ReR	HC-S-S-LR-LR-SM	HC-S-S-LR-LR-SM	SM	LR	LR	LR	SM	SM	LR	SM	SM	(2,2)	3	6.8(4.7)--pm(>>,forward)
5j7l.cif1	293	DA.A.190.|DA.C.679.-DA.G.798.	DA.A.191.|DA.C.678.-DA.G.799.	AnsA_LnsL_RnsR	HC-S-S-LR-LR-SM	HC-S-S-LR-LR-SM	SM	LR	LR	LR	SM	SM	LR	SM	SM	(2,2)	3	6.8(4.7)--pm(>>,forward)				1.1(0.3)--pm(<<,backward)				3.0(1.4)--pm(>>,forward)
5j7l.cif1	294	DA.A.199.|DA.C.2078.-DA.G.2242.	DA.A.2434.|DA.A.2077.-DA.U.2243.	AsA_LnsL_RnsR	HC-S-S-LR-LR-SM	JI-S-S-LC-LC-SM	LR	LR	LR	LC	SM	SM	LC	SM	SM	(2,2)	4	3.0(1.3)--mm(<>,outward)				2.9(2.0)--pm(<<,backward)				7.1(2.8)--pm(>>,forward)
5j7l.cif1	295	DA.A.226.|DA.G.409.-DA.C.418.	DA.A.227.|DA.G.410.-DA.C.417.	AnsA_LnsL_RnR	HC-S-S-LR-LR-SM	HC-S-S-LR-LR-SM	SM	LR	LR	LR	SM	SM	LR	SM	SM	(2,2)	3	6.7(4.8)--pm(>>,forward)				4.4(3.1)--pm(>>,forward)
5j7l.cif1	296	DA.A.294.|DA.G.80.-DA.C.106.	DA.A.346.|DA.C.79.-DA.G.107.	LnL_LsR_RnR	IC-S-S-LR-LR-SM	IC-S-S-LR-LR-SM	SM	LR	LR	LR	SM	SM	LR	SM	SM	(2,2)	4						4.2(1.5)--mm(<>,outward)
5j7l.cif1	297	DA.A.299.|DA.G.319.-DA.C.323.	DA.A.300.|DA.C.318.-DA.G.333.	AnsA_LnL_LsR	JI-HP-HP-LR-LR-SM	JI-S-S-LC-LC-SM	SM	LC	LC	LR	LC	LC	LR	LC	LC	(2,2)	4	6.7(4.6)--pm(>>,forward)					3.9(1.2)--mm(<>,outward)
5j7l.cif1	298	DA.A.514.|DA.C.581.-DA.G.1259.	DA.A.515.|DA.U.580.-DA.A.1260.	AnsA_LnsL_RnsR	JCJP-S-S-LC-LC-SM	JCJP-S-S-LC-LC-SM	SM	LC	LC	LC	SM	SM	LC	SM	SM	(2,2)	3	6.6(4.9)--pm(>>,forward)				1.2(0.1)--pm(<<,backward)				4.7(3.4)--pm(>>,forward)
5j7l.cif1	299	DA.A.532.|DA.A.2019.-DA.G.2035.	DA.A.532.|DA.A.2020.-DA.U.2034.	AeA_LnsL_RnsR	JP-JP-HC-SM-LR-LR	JP-JP-HC-SM-LR-LR	SM	SM	LR	SM	SM	LR	LR	LR	SM	(1,2)	3					3.6(1.6)--pm(>>,forward)				1.5(0.3)--pm(<<,backward)
5j7l.cif1	300	DA.A.586.|DA.C.671.-DA.G.809.	DA.A.1254.|DA.C.672.-DA.G.808.	AsA_LnL_RnsR	JC-S-S-LC-LC-SM	JC-S-S-LC-LC-SM	SM	LC	LC	LC	SM	SM	LC	SM	SM	(2,2)	4	1.9(0.7)--mm(<>,outward)								5.1(3.6)--pm(<<,backward)
5j7l.cif1	301	DA.A.608.|DA.C.237.-DA.G.260.	DA.A.609.|DA.C.237.-DA.G.260.	AnsA_LeL_ReR	IC-S-S-LR-LR-SM	IC-S-S-LR-LR-SM	SM	LR	LR	LR	SM	SM	LR	SM	SM	(3,2)	4	6.2(4.5)--pm(>>,forward)
5j7l.cif1	301	DA.A.608.|DA.C.237.-DA.G.260.	DA.A.621.|DA.C.238.-DA.G.259.	AsA_LnL_RnsR	IC-S-S-LR-LR-SM	IC-S-S-LR-LR-SM	SM	LR	LR	LR	SM	SM	LR	SM	SM	(3,2)	4	7.0(4.3)--mm(<>,outward)								2.9(1.4)--pm(<<,backward)
5j7l.cif1	301	DA.A.609.|DA.C.237.-DA.G.260.	DA.A.621.|DA.C.238.-DA.G.259.	LnL_RnsR	IC-S-S-LR-LR-SM	IC-S-S-LR-LR-SM	SM	LR	LR	LR	SM	SM	LR	SM	SM	(3,2)	4									2.9(1.4)--pm(<<,backward)
5j7l.cif1	302	DA.A.643.|DA.U.2348.-DA.A.2369.	DA.A.644.|DA.G.2349.-DA.C.2368.	AnsA_LnL_RnR_RsL	HC-S-S-LR-LR-SM	HC-S-S-LR-LR-SM	SM	LR	LR	LR	SM	SM	LR	SM	SM	(2,2)	3	4.0(3.3)--pm(>>,forward)							4.6(2.4)--mm(<>,outward)
5j7l.cif1	303	DA.A.675.|DA.G.2067.-DA.C.2443.	DA.A.676.|DA.G7M.2069.-DA.C.2442.	AnsA_LsL_RnR	IC-S-S-LR-LR-SM	IC-S-S-LR-LR-SM	SM	LR	LR	LR	LR	LR	LR	LR	LR	(2,2)	5	7.3(5.6)--pm(>>,forward)				4.3(1.4)--pm(>>,forward)
5j7l.cif1	304	DA.A.693.|DA.A.1353.-DA.U.1379.	DA.A.1353.|DA.A.693.-DA.U.769.	AeL_LeA	S-IC-IC-LR-LR-SM	IC-S-S-LR-LR-SM	LR	SM	SM	SM	LR	LR	SM	LR	LR	(3,3)	4
5j7l.cif1	304	DA.A.693.|DA.A.1353.-DA.U.1379.	DA.A.1354.|DA.C.692.-DA.G.770.	AnL_AsR_LnsA	S-IC-IC-LR-LR-SM	IC-S-S-LR-LR-SM	LR	SM	SM	SM	LR	LR	SM	LR	LR	(3,3)	4			2.6(1.2)--mm(<>,outward)	6.5(4.6)--pm(>>,forward)
5j7l.cif1	305	DA.A.792.|DA.C.2072.-DA.G.2437.	DA.A.2598.|DA.C.2073.-DA.G.2436.	LnsL_RnsR	JC-S-S-LR-LR-SM	HC-S-S-LR-LR-SM	LR	LR	LR	LR	SM	SM	LR	SM	SM	(2,2)	4					2.3(0.8)--pm(>>,forward)				2.5(1.1)--pm(<<,backward)
5j7l.cif1	306	DA.A.910.|DA.C.2264.-DA.G.2276.	DA.A.911.|DA.C.2263.-DA.G.2277.	AnsA_LnsL_RnsR	IC-S-S-LR-LR-SM	IC-S-S-LR-LR-SM	SM	LR	LR	LR	SM	SM	LR	SM	SM	(2,2)	3	4.9(3.3)--pm(>>,forward)				1.1(0.3)--pm(<<,backward)				2.7(1.1)--pm(>>,forward)
5j7l.cif1	307	DA.A.959.|DA.PSU.2457.-DA.G.2494.	DA.A.960.|DA.C.2456.-DA.G.2495.	AnsA_LnsL_RnsR	HC-IC-IC-LR-LR-SM	HC-S-S-LR-LR-SM	SM	LR	LR	LR	LC	LC	LR	LC	LC	(3,3)	6	6.4(4.8)--pm(>>,forward)				2.3(0.9)--pm(<<,backward)				4.0(2.4)--pm(>>,forward)
5j7l.cif1	307	DA.A.960.|DA.C.2456.-DA.G.2495.	DA.A.2031.|DA.G.2455.-DA.C.2496.	LnsL_RnsR	HC-S-S-LR-LR-SM	HC-S-S-LR-LR-SM	LR	LR	LR	LR	SM	SM	LR	SM	SM	(3,3)	6					5.9(2.7)--pm(<<,backward)				7.5(3.7)--pm(>>,forward)
5j7l.cif1	308	DA.A.980.|DA.U.2026.-DA.A.2037.	DA.A.981.|DA.G.2027.-DA.C.2036.	AnsA_LnsL_RnR_RsL	HC-S-S-LR-LR-SM	HC-S-S-LR-LR-SM	SM	LR	LR	LR	SM	SM	LR	SM	SM	(3,3)	4	6.3(4.3)--pm(>>,forward)				1.0(0.5)--pm(>>,forward)			2.5(0.6)--mm(<>,outward)
5j7l.cif1	308	DA.A.980.|DA.U.2026.-DA.A.2037.	DA.A.1133.|DA.C.2025.-DA.G.2038.	LnsL_RnsR	HC-S-S-LR-LR-SM	IP-S-S-LR-LR-SM	LR	LR	LR	LR	SM	SM	LR	SM	SM	(3,3)	4					3.2(0.9)--pm(<<,backward)				3.8(3.0)--pm(>>,forward)
5j7l.cif1	309	DA.A.1000.|DA.G.976.-DA.C.987.	DA.A.1001.|DA.G.977.-DA.C.986.	AnsA_LnsL_RnsR	IC-S-S-LR-LR-SM	IC-S-S-LR-LR-SM	SM	LR	LR	LR	SM	SM	LR	SM	SM	(4,4)	6	6.3(4.6)--pm(>>,forward)				2.2(0.7)--pm(>>,forward)				0.3(0.1)--pm(<<,backward)
5j7l.cif1	309	DA.A.1001.|DA.G.977.-DA.C.986.	DA.A.1009.|DA.G.1002.-DA.C.1153.	AnsL	IC-S-S-LR-LR-SM	IP-S-S-LR-LR-SM	LR	LC	LC	LR	LR	LR	LR	LR	LR	(4,4)	6		1.6(0.4)--pm(>>,forward)
5j7l.cif1	309	DA.A.1009.|DA.G.1002.-DA.C.1153.	DA.A.1010.|DA.G.1003.-DA.C.1152.	AnsA_LnsL_RnR	IP-S-S-LR-LR-SM	IP-S-S-LR-LR-SM	SM	LR	LR	LR	SM	SM	LR	SM	SM	(4,4)	6	5.0(2.7)--pm(>>,forward)				4.0(1.7)--pm(>>,forward)
5j7l.cif1	310	DA.A.1028.|DA.G.2464.-DA.C.2486.	DA.A.1029.|DA.C.2465.-DA.G.2485.	AnsA_LnsL_RnsR	IP-S-S-LR-LR-SM	IP-S-S-LR-LR-SM	SM	LR	LR	LR	SM	SM	LR	SM	SM	(3,3)	4	1.3(0.3)--pm(>>,forward)				7.1(3.7)--pm(>>,forward)				3.5(1.5)--pm(<<,backward)
5j7l.cif1	310	DA.A.1028.|DA.G.2464.-DA.C.2486.	DA.A.1127.|DA.C.2463.-DA.G.2487.	LnL_LsR_RnR	IP-S-S-LR-LR-SM	IP-S-S-LR-LR-SM	SM	LR	LR	LR	SM	SM	LR	SM	SM	(3,3)	4						5.9(3.0)--mm(<>,outward)
5j7l.cif1	311	DA.A.1084.|DA.A.1054.-DA.U.1105.	DA.A.1085.|DA.G.1055.-DA.C.1104.	AnsA_LnsL_RnR	IC-S-S-LC-LC-SM	IC-S-S-LC-LC-SM	SM	LC	LC	LC	SM	SM	LC	SM	SM	(2,2)	3	7.4(5.7)--pm(>>,forward)				2.2(2.1)--pm(>>,forward)
5j7l.cif1	312	DA.A.1274.|DA.G.1296.-DA.C.1644.	DA.A.1275.|DA.C.1295.-DA.G.1645.	AnA_LnL_LsR_RnR	JC-S-S-LC-LC-SM	JC-S-S-LC-LC-SM	SM	LC	LC	LC	SM	SM	LC	SM	SM	(3,3)	4						5.0(2.3)--mm(<>,outward)
5j7l.cif1	312	DA.A.1274.|DA.G.1296.-DA.C.1644.	DA.A.1302.|DA.C.1297.-DA.G.1643.	LnsL_RnsR	JC-S-S-LC-LC-SM	JC-S-S-LC-LC-SM	LR	LC	LC	LC	SM	SM	LC	SM	SM	(3,3)	4					4.0(1.7)--pm(>>,forward)				6.0(2.5)--pm(<<,backward)
5j7l.cif1	304	DA.A.1353.|DA.A.693.-DA.U.769.	DA.A.1354.|DA.C.692.-DA.G.770.	AnsA_LnL_LsR_RnR	IC-S-S-LR-LR-SM	IC-S-S-LR-LR-SM	SM	LR	LR	LR	SM	SM	LR	SM	SM	(3,3)	4	6.5(4.6)--pm(>>,forward)					2.6(1.2)--mm(<>,outward)
5j7l.cif1	313	DA.A.1383.|DA.U.1405.-DA.A.1597.	DA.A.1384.|DA.G.1343.-DA.C.1404.	AnsA_LnR	JP-S-S-LC-LC-SM	JP-S-S-LC-LC-SM	SM	LC	LC	LC	LR	LR	LC	LR	LR	(2,2)	5	6.6(4.8)--pm(>>,forward)
5j7l.cif1	314	DA.A.1392.|DA.C.1315.-DA.G.1337.	DA.A.1393.|DA.C.1314.-DA.G.1338.	AnsA_LnL_RnsR	HC-S-S-LR-LR-SM	HC-S-S-LR-LR-SM	SM	LR	LR	LR	SM	SM	LR	SM	SM	(2,2)	3	6.8(4.7)--pm(>>,forward)								4.5(2.9)--pm(>>,forward)
5j7l.cif1	315	DA.A.1469.|DA.C.1386.-DA.G.1401.	DA.A.1470.|DA.A.1385.-DA.U.1402.	AnsA_LnsL_RnsR	IC-S-S-LR-LR-SM	IC-S-S-LR-LR-SM	SM	LR	LR	LR	SM	SM	LR	SM	SM	(2,2)	3	1.4(1.0)--pm(>>,forward)				3.0(1.4)--pm(<<,backward)				7.4(4.4)--pm(>>,forward)
5j7l.cif1	316	DA.A.1477.|DA.G.1435.-DA.C.1557.	DA.A.1515.|DA.G.1436.-DA.C.1556.	AsA_LnsL_RnsR	IC-S-S-LR-LR-SM	IC-S-S-LR-LR-SM	SM	LR	LR	LR	SM	SM	LR	SM	SM	(2,2)	4	4.4(3.0)--mm(<>,outward)				4.9(3.6)--pm(>>,forward)				1.2(0.1)--pm(<<,backward)
5j7l.cif1	317	DA.A.1494.|DA.G.1421.-DA.C.1577.	DA.A.1496.|DA.G.1421.-DA.C.1577.	LeL_ReR	HC-S-S-LR-LR-SM	HC-S-S-LR-LR-SM	SM	LR	LR	LR	SM	SM	LR	SM	SM	(2,1)	3
5j7l.cif1	318	DA.A.1544.|DA.C.1447.-DA.G.1464.	DA.A.1545.|DA.C.1446.-DA.G.1465.	AnsA_LnsL_RnsR	JCJP-S-S-LC-LC-SM	JCJP-S-S-LC-LC-SM	SM	LC	LC	LC	SM	SM	LC	SM	SM	(2,2)	3	6.7(4.8)--pm(>>,forward)				2.6(0.8)--pm(<<,backward)				4.0(2.7)--pm(>>,forward)
5j7l.cif1	319	DA.A.1570.|DA.C.1351.-DA.G.1380.	DA.A.1571.|DA.C.1351.-DA.G.1380.	AnsA_LeL_ReR	ICJP-S-S-LR-LR-SM	ICJP-S-S-LR-LR-SM	SM	LR	LR	LR	SM	SM	LR	SM	SM	(3,2)	3	6.1(4.4)--pm(>>,forward)
5j7l.cif1	319	DA.A.1571.|DA.C.1351.-DA.G.1380.	DA.A.1572.|DA.C.1350.-DA.G.1381.	AnsA_LnL_RnR	ICJP-S-S-LR-LR-SM	ICJP-S-S-LR-LR-SM	SM	LR	LR	LR	SM	SM	LR	SM	SM	(3,2)	3	2.7(2.3)--pm(>>,forward)
5j7l.cif1	320	DA.A.1754.|DA.G.2693.-DA.C.2716.	DA.A.1755.|DA.G.2694.-DA.C.2715.	AnsA_LnsL_RnR	JC-S-S-LR-LR-SM	JC-S-S-LR-LR-SM	SM	LR	LR	LR	SM	SM	LR	SM	SM	(2,2)	3	6.2(4.5)--pm(>>,forward)				2.4(0.9)--pm(>>,forward)
5j7l.cif1	321	DA.A.1785.|DA.G.2588.-DA.C.2606.	DA.A.1938.|DA.A.2589.-DA.PSU.2605.	LnsL_RnR	HC-JC-JC-LR-LR-SM	JC-JC-JC-LR-LR-SM	LR	LR	LR	LR	SM	SM	LR	SM	SM	(2,2)	4					5.5(2.6)--pm(>>,forward)
5j7l.cif1	322	DA.A.1802.|DA.U.1798.-DA.A.1821.	DA.A.1803.|DA.G.1797.-DA.C.1822.	AnsA_LnsL_RnsR	IC-S-S-LC-LC-SM	IC-S-S-LC-LC-SM	SM	LC	LC	LC	SM	SM	LC	SM	SM	(2,2)	3	6.3(4.5)--pm(>>,forward)				7.5(4.2)--pm(<<,backward)				4.8(3.2)--pm(>>,forward)
5j7l.cif1	323	DA.A.1809.|DA.C.1363.-DA.G.1368.	DA.A.1810.|DA.C.1362.-DA.G.1369.	AnsA_LnsL_RnsR	HC-S-S-LR-LR-SM	HC-S-S-LR-LR-SM	SM	LR	LR	LR	SM	SM	LR	SM	SM	(2,2)	3	6.9(5.0)--pm(>>,forward)				1.1(0.4)--pm(<<,backward)				1.7(0.4)--pm(>>,forward)
5j7l.cif1	324	DA.A.1853.|DA.U.2086.-DA.U.2233.	DA.A.1853.|DA.G.2087.-DA.C.2232.	AeA_LnsL_RnsR	IC-IC-IC-LR-LR-SM	IC-S-S-LR-LR-SM	SM	LR	LR	LR	LC	LC	LR	LC	LC	(4,3)	8					2.4(1.2)--pm(>>,forward)				2.6(1.0)--pm(<<,backward)
5j7l.cif1	324	DA.A.1853.|DA.U.2086.-DA.U.2233.	DA.A.1854.|DA.G.2087.-DA.C.2232.	AnsA_LnsL_RnsR	IC-IC-IC-LR-LR-SM	IC-S-S-LR-LR-SM	SM	LR	LR	LR	LC	LC	LR	LC	LC	(4,3)	8	7.3(5.6)--pm(>>,forward)				2.4(1.2)--pm(>>,forward)				2.6(1.0)--pm(<<,backward)
5j7l.cif1	324	DA.A.1853.|DA.U.2086.-DA.U.2233.	DA.A.1889.|DA.U.2086.-DA.U.2233.	AsA_LeL_ReR	IC-IC-IC-LR-LR-SM	IC-IC-IC-LR-LR-SM	SM	LR	LR	LR	SM	SM	LR	SM	SM	(4,3)	8	4.7(2.1)--mm(<>,outward)
5j7l.cif1	324	DA.A.1853.|DA.U.2086.-DA.U.2233.	DA.A.1890.|DA.U.2085.-DA.G.2234.	LnL_LsR_RnR	IC-IC-IC-LR-LR-SM	IC-S-S-LR-LR-SM	SM	LR	LR	LR	LC	LC	LR	LC	LC	(4,3)	8						3.8(0.6)--mm(<>,outward)
5j7l.cif1	324	DA.A.1853.|DA.G.2087.-DA.C.2232.	DA.A.1854.|DA.G.2087.-DA.C.2232.	AnsA_LeL_ReR	IC-S-S-LR-LR-SM	IC-S-S-LR-LR-SM	SM	LR	LR	LR	SM	SM	LR	SM	SM	(4,3)	8	7.3(5.6)--pm(>>,forward)
5j7l.cif1	324	DA.A.1853.|DA.G.2087.-DA.C.2232.	DA.A.1889.|DA.U.2086.-DA.U.2233.	AsA_LnsL_RnsR	IC-S-S-LR-LR-SM	IC-IC-IC-LR-LR-SM	SM	LR	LR	LR	LC	LC	LR	LC	LC	(4,3)	8	4.7(2.1)--mm(<>,outward)				2.4(1.2)--pm(<<,backward)				2.6(1.0)--pm(>>,forward)
5j7l.cif1	324	DA.A.1854.|DA.G.2087.-DA.C.2232.	DA.A.1889.|DA.U.2086.-DA.U.2233.	LnsL_RnsR	IC-S-S-LR-LR-SM	IC-IC-IC-LR-LR-SM	SM	LR	LR	LR	LC	LC	LR	LC	LC	(4,3)	8					2.4(1.2)--pm(<<,backward)				2.6(1.0)--pm(>>,forward)
5j7l.cif1	324	DA.A.1889.|DA.U.2086.-DA.U.2233.	DA.A.1890.|DA.U.2085.-DA.G.2234.	AnsA_LnL_LsR_RnR	IC-IC-IC-LR-LR-SM	IC-S-S-LR-LR-SM	SM	LR	LR	LR	LC	LC	LR	LC	LC	(4,3)	8	4.0(3.5)--pm(>>,forward)					3.8(0.6)--mm(<>,outward)
5j7l.cif1	325	DA.A.1900.|DA.C.1793.-DA.G.1826.	DA.A.1970.|DA.G.1792.-DA.U.1827.	AsA_LnsL_RnsR	BC-S-S-LR-LR-SM	JC-S-S-LR-LR-SM	LR	LR	LR	LR	SM	SM	LR	SM	SM	(3,3)	6	3.8(3.4)--mp(<<,backward)				6.5(3.0)--pm(<<,backward)				7.2(4.3)--pm(>>,forward)
5j7l.cif1	326	DA.A.1927.|DA.C.1837.-DA.G.1903.	DA.A.1928.|DA.C.1836.-DA.G.1904.	AnsA_LnL_RnsR	JC-S-S-LC-LC-SM	JC-S-S-LC-LC-SM	SM	LC	LC	LC	SM	SM	LC	SM	SM	(2,2)	3	6.7(5.0)--pm(>>,forward)								3.0(1.4)--pm(>>,forward)
5j7l.cif1	327	DA.A.1952.|DA.U.2548.-DA.A.2560.	DA.A.1953.|DA.G.2549.-DA.C.2559.	AnsA_LnL_RnR_RsL	HC-S-S-LR-LR-SM	HC-S-S-LR-LR-SM	SM	LR	LR	LR	SM	SM	LR	SM	SM	(2,2)	3	7.2(5.2)--pm(>>,forward)							4.3(1.8)--mm(<>,outward)
5j7l.cif1	325	DA.A.1969.|DA.C.1833.-DA.G.1972.	DA.A.1970.|DA.G.1792.-DA.U.1827.	AnA_RsA	JC-S-S-LC-LC-SM	JC-S-S-LR-LR-SM	SM	LR	LR	LC	LR	LR	LC	LR	LR	(3,3)	6							2.3(1.1)--mm(<>,outward)
5j7l.cif1	328	DA.A.2273.|DA.G.953.-DA.C.964.	DA.A.2274.|DA.G.954.-DA.U.963.	AnsA_LnsL_RnR	HC-S-S-LR-LR-SM	HC-S-S-LR-LR-SM	SM	LR	LR	LR	SM	SM	LR	SM	SM	(2,2)	3	1.2(0.2)--pm(>>,forward)				2.1(0.6)--pm(>>,forward)
5j7l.cif1	329	DA.A.2327.|DA.C.2261.-DA.G.2279.	DA.A.2388.|DA.C.2260.-DA.G.2280.	AsA_LnL_RnsR	HP-S-S-LR-LR-SM	JIJP-S-S-LC-LC-SM	LR	LR	LR	LC	SM	SM	LC	SM	SM	(2,2)	4	2.4(0.9)--mm(<>,outward)								3.7(1.8)--pm(>>,forward)
5j7l.cif1	330	DA.A.2564.|DA.C.2521.-DA.G.2544.	DA.A.2565.|DA.C.2520.-DA.G.2545.	AnsA_LnL_RnsR	JC-S-S-LC-LC-SM	JC-S-S-LC-LC-SM	SM	LC	LC	LC	SM	SM	LC	SM	SM	(2,2)	3	7.2(5.1)--pm(>>,forward)								4.8(3.2)--pm(>>,forward)
5j7l.cif1	331	DA.A.2740.|DA.G.2523.-DA.C.2540.	DA.A.2741.|DA.G.2524.-DA.C.2539.	AnsA_LnsL_RnR	IC-S-S-LR-LR-SM	IC-S-S-LR-LR-SM	SM	LR	LR	LR	SM	SM	LR	SM	SM	(3,2)	4	7.1(5.2)--pm(>>,forward)				3.1(1.6)--pm(>>,forward)
5j7l.cif1	331	DA.A.2740.|DA.G.2523.-DA.C.2540.	DA.A.2764.|DA.G.2523.-DA.C.2540.	AsA_LeL_ReR	IC-S-S-LR-LR-SM	IC-S-S-LR-LR-SM	SM	LR	LR	LR	SM	SM	LR	SM	SM	(3,2)	4	5.5(3.7)--mm(<>,outward)
5j7l.cif1	331	DA.A.2741.|DA.G.2524.-DA.C.2539.	DA.A.2764.|DA.G.2523.-DA.C.2540.	LnsL_RnR	IC-S-S-LR-LR-SM	IC-S-S-LR-LR-SM	SM	LR	LR	LR	SM	SM	LR	SM	SM	(3,2)	4					3.1(1.6)--pm(<<,backward)
5j7l.cif1	332	DA.A.2809.|DA.G.2630.-DA.C.2788.	DA.A.2810.|DA.G.2631.-DA.C.2787.	AnsA_LnsL_RnR	JI-S-S-LC-LC-SM	JI-S-S-LC-LC-SM	SM	LC	LC	LC	SM	SM	LC	SM	SM	(2,2)	3	5.1(3.5)--pm(>>,forward)				3.8(2.5)--pm(>>,forward)
5k7d.cif1	333	A.A.19.|A.G.2.-A.C.15.	A.A.19.|A.U.3.-A.A.14.	AeA_LnsL_RnsR	HP-S-S-LC-LC-SM	HP-S-S-LC-LC-SM	SM	LC	LC	LC	SM	SM	LC	SM	SM	(4,3)	3					6.5(4.0)--pm(>>,forward)				4.4(2.7)--pm(<<,backward)
5k7d.cif1	333	A.A.19.|A.G.2.-A.C.15.	A.A.20.|A.U.3.-A.A.14.	AnsA_LnsL_RnsR	HP-S-S-LC-LC-SM	HP-S-S-LC-LC-SM	SM	LC	LC	LC	SM	SM	LC	SM	SM	(4,3)	3	3.4(2.4)--pm(>>,forward)				6.5(4.0)--pm(>>,forward)				4.4(2.7)--pm(<<,backward)
5k7d.cif1	333	A.A.19.|A.U.3.-A.A.14.	A.A.20.|A.U.3.-A.A.14.	AnsA_LeL_ReR	HP-S-S-LC-LC-SM	HP-S-S-LC-LC-SM	SM	LC	LC	LC	SM	SM	LC	SM	SM	(4,3)	3	3.4(2.4)--pm(>>,forward)
5k7d.cif1	333	A.A.19.|A.U.3.-A.A.14.	A.A.21.|A.G.4.-A.C.13.	LnL_RnR_RsL	HP-S-S-LC-LC-SM	HP-S-S-LC-LC-SM	SM	LC	LC	LC	SM	SM	LC	SM	SM	(4,3)	3								1.7(0.8)--mm(<>,outward)
5k7d.cif1	333	A.A.19.|A.U.3.-A.A.14.	A.A.23.|A.G.4.-A.C.13.	LnL_RnR_RsL	HP-S-S-LC-LC-SM	HP-S-S-LC-LC-SM	SM	LC	LC	LC	SM	SM	LC	SM	SM	(4,3)	3								1.7(0.8)--mm(<>,outward)
5k7d.cif1	333	A.A.20.|A.U.3.-A.A.14.	A.A.21.|A.G.4.-A.C.13.	AnsA_LnL_RnR_RsL	HP-S-S-LC-LC-SM	HP-S-S-LC-LC-SM	SM	LC	LC	LC	SM	SM	LC	SM	SM	(4,3)	3	6.6(4.9)--pm(>>,forward)							1.7(0.8)--mm(<>,outward)
5k7d.cif1	333	A.A.20.|A.U.3.-A.A.14.	A.A.23.|A.G.4.-A.C.13.	LnL_RnR_RsL	HP-S-S-LC-LC-SM	HP-S-S-LC-LC-SM	SM	LC	LC	LC	SM	SM	LC	SM	SM	(4,3)	3								1.7(0.8)--mm(<>,outward)
5k7d.cif1	333	A.A.21.|A.G.4.-A.C.13.	A.A.23.|A.G.4.-A.C.13.	AsA_LeL_ReR	HP-S-S-LC-LC-SM	HP-S-S-LC-LC-SM	SM	LC	LC	LC	SM	SM	LC	SM	SM	(4,3)	3	1.8(1.0)--pm(>>,forward)
5kpy.cif1	334	A.A.33.|A.G.37.-A.C.61.	A.A.65.|A.G.37.-A.C.61.	LeL_ReR	HP-S-S-LC-LC-SM	HP-S-S-LC-LC-SM	LR	LC	LC	LC	SM	SM	LC	SM	SM	(3,2)	4
5kpy.cif1	334	A.A.33.|A.G.37.-A.C.61.	A.A.66.|A.G.38.-A.C.60.	LnsL_RnR	HP-S-S-LC-LC-SM	HP-S-S-LC-LC-SM	LR	LC	LC	LC	SM	SM	LC	SM	SM	(3,2)	4					6.7(4.5)--pm(>>,forward)
5kpy.cif1	334	A.A.65.|A.G.37.-A.C.61.	A.A.66.|A.G.38.-A.C.60.	AnsA_LnsL_RnR	HP-S-S-LC-LC-SM	HP-S-S-LC-LC-SM	SM	LC	LC	LC	SM	SM	LC	SM	SM	(3,2)	4	6.0(4.4)--pm(>>,forward)				6.7(4.5)--pm(>>,forward)
5ktj.cif1	335	A.A.19.|A.C.2.-A.G.15.	A.A.19.|A.U.3.-A.A.14.	AeA_LnsL_RnsR	HP-S-S-LC-LC-SM	HP-S-S-LC-LC-SM	SM	LC	LC	LC	SM	SM	LC	SM	SM	(4,3)	3					1.2(0.4)--pm(>>,forward)				2.7(2.6)--pm(<<,backward)
5ktj.cif1	335	A.A.19.|A.C.2.-A.G.15.	A.A.20.|A.U.3.-A.A.14.	AnA_LnsL_RnsR	HP-S-S-LC-LC-SM	HP-S-S-LC-LC-SM	SM	LC	LC	LC	SM	SM	LC	SM	SM	(4,3)	3					1.2(0.4)--pm(>>,forward)				2.7(2.6)--pm(<<,backward)
5ktj.cif1	335	A.A.19.|A.U.3.-A.A.14.	A.A.20.|A.U.3.-A.A.14.	AnA_LeL_ReR	HP-S-S-LC-LC-SM	HP-S-S-LC-LC-SM	SM	LC	LC	LC	SM	SM	LC	SM	SM	(4,3)	3
5ktj.cif1	335	A.A.19.|A.U.3.-A.A.14.	A.A.21.|A.C.4.-A.G.13.	LnsL_RnsR	HP-S-S-LC-LC-SM	HP-S-S-LC-LC-SM	SM	LC	LC	LC	SM	SM	LC	SM	SM	(4,3)	3					2.6(1.0)--pm(>>,forward)				4.5(3.3)--pm(<<,backward)
5ktj.cif1	335	A.A.19.|A.U.3.-A.A.14.	A.A.23.|A.C.4.-A.G.13.	LnsL_RnsR	HP-S-S-LC-LC-SM	HP-S-S-LC-LC-SM	SM	LC	LC	LC	SM	SM	LC	SM	SM	(4,3)	3					2.6(1.0)--pm(>>,forward)				4.5(3.3)--pm(<<,backward)
5ktj.cif1	335	A.A.20.|A.U.3.-A.A.14.	A.A.21.|A.C.4.-A.G.13.	AnsA_LnsL_RnsR	HP-S-S-LC-LC-SM	HP-S-S-LC-LC-SM	SM	LC	LC	LC	SM	SM	LC	SM	SM	(4,3)	3	4.1(2.7)--pm(>>,forward)				2.6(1.0)--pm(>>,forward)				4.5(3.3)--pm(<<,backward)
5ktj.cif1	335	A.A.20.|A.U.3.-A.A.14.	A.A.23.|A.C.4.-A.G.13.	LnsL_RnsR	HP-S-S-LC-LC-SM	HP-S-S-LC-LC-SM	SM	LC	LC	LC	SM	SM	LC	SM	SM	(4,3)	3					2.6(1.0)--pm(>>,forward)				4.5(3.3)--pm(<<,backward)
5ktj.cif1	335	A.A.21.|A.C.4.-A.G.13.	A.A.23.|A.C.4.-A.G.13.	AsA_LeL_ReR	HP-S-S-LC-LC-SM	HP-S-S-LC-LC-SM	SM	LC	LC	LC	SM	SM	LC	SM	SM	(4,3)	3	1.4(0.6)--pm(>>,forward)
5ngm.cif1	336	Aa.A.52.|Aa.G.112.-Aa.C.322.	Aa.A.52.|Aa.U.113.-Aa.A.321.	AeA_LnsL_RnsR	JC-S-S-LR-LR-SM	JC-S-S-LR-LR-SM	SM	LR	LR	LR	SM	SM	LR	SM	SM	(3,2)	5					6.8(4.3)--pm(>>,forward)				5.3(3.8)--pm(<<,backward)
5ngm.cif1	336	Aa.A.52.|Aa.G.112.-Aa.C.322.	Aa.A.115.|Aa.U.113.-Aa.A.321.	AsA_LnsL_RnsR	JC-S-S-LR-LR-SM	JC-S-S-LC-LC-SM	LR	LR	LR	LC	SM	SM	LC	SM	SM	(3,2)	5	4.2(1.3)--pm(>>,forward)				6.8(4.3)--pm(>>,forward)				5.3(3.8)--pm(<<,backward)
5ngm.cif1	336	Aa.A.52.|Aa.G.112.-Aa.C.322.	Aa.A.361.|Aa.G.112.-Aa.C.322.	AsA_LeL_ReR	JC-S-S-LR-LR-SM	JC-S-S-LC-LC-SM	LR	LR	LR	LC	SM	SM	LC	SM	SM	(3,2)	5	7.1(5.4)--mm(<>,outward)
5ngm.cif1	336	Aa.A.52.|Aa.U.113.-Aa.A.321.	Aa.A.115.|Aa.U.113.-Aa.A.321.	AsA_LeL_ReR	JC-S-S-LR-LR-SM	JC-S-S-LC-LC-SM	LR	LR	LR	LC	SM	SM	LC	SM	SM	(3,2)	5	4.2(1.3)--pm(>>,forward)
5ngm.cif1	336	Aa.A.52.|Aa.U.113.-Aa.A.321.	Aa.A.361.|Aa.G.112.-Aa.C.322.	AsA_LnsL_RnsR	JC-S-S-LR-LR-SM	JC-S-S-LC-LC-SM	LR	LR	LR	LC	SM	SM	LC	SM	SM	(3,2)	5	7.1(5.4)--mm(<>,outward)				6.8(4.3)--pm(<<,backward)				5.3(3.8)--pm(>>,forward)
5ngm.cif1	336	Aa.A.115.|Aa.U.113.-Aa.A.321.	Aa.A.361.|Aa.G.112.-Aa.C.322.	LnsL_RnsR	JC-S-S-LC-LC-SM	JC-S-S-LC-LC-SM	LR	LC	LC	LC	SM	SM	LC	SM	SM	(3,2)	5					6.8(4.3)--pm(<<,backward)				5.3(3.8)--pm(>>,forward)
5ngm.cif1	337	Aa.A.151.|Aa.C.68.-Aa.G.101.	Aa.A.151.|Aa.G.69.-Aa.A.100.	AeA_LnL_RnsR	IC-S-S-LR-LR-SM	IC-IC-IC-LR-LR-SM	SM	LR	LR	LR	LC	LC	LR	LC	LC	(6,5)	9									3.2(1.9)--pm(<<,backward)
5ngm.cif1	337	Aa.A.151.|Aa.C.68.-Aa.G.101.	Aa.A.152.|Aa.G.69.-Aa.A.100.	AnsA_LnL_RnsR	IC-S-S-LR-LR-SM	IC-IC-IC-LR-LR-SM	SM	LR	LR	LR	LC	LC	LR	LC	LC	(6,5)	9	3.6(1.4)--pm(>>,forward)								3.2(1.9)--pm(<<,backward)
5ngm.cif1	337	Aa.A.151.|Aa.C.68.-Aa.G.101.	Aa.A.171.|Aa.C.68.-Aa.G.101.	LeL_ReR	IC-S-S-LR-LR-SM	IC-S-S-LR-LR-SM	SM	LR	LR	LR	SM	SM	LR	SM	SM	(6,5)	9
5ngm.cif1	337	Aa.A.151.|Aa.C.68.-Aa.G.101.	Aa.A.172.|Aa.G.67.-Aa.C.102.	LnsL_RnsR	IC-S-S-LR-LR-SM	IC-S-S-LR-LR-SM	SM	LR	LR	LR	SM	SM	LR	SM	SM	(6,5)	9					4.0(2.0)--pm(<<,backward)				5.6(2.6)--pm(>>,forward)
5ngm.cif1	337	Aa.A.151.|Aa.G.69.-Aa.A.100.	Aa.A.152.|Aa.G.69.-Aa.A.100.	AnsA_LeL_ReR	IC-IC-IC-LR-LR-SM	IC-IC-IC-LR-LR-SM	SM	LR	LR	LR	SM	SM	LR	SM	SM	(6,5)	9	3.6(1.4)--pm(>>,forward)
5ngm.cif1	337	Aa.A.151.|Aa.G.69.-Aa.A.100.	Aa.A.171.|Aa.C.68.-Aa.G.101.	LnL_RnsR	IC-IC-IC-LR-LR-SM	IC-S-S-LR-LR-SM	SM	LR	LR	LR	LC	LC	LR	LC	LC	(6,5)	9									3.2(1.9)--pm(>>,forward)
5ngm.cif1	337	Aa.A.152.|Aa.G.69.-Aa.A.100.	Aa.A.171.|Aa.C.68.-Aa.G.101.	LnL_RnsR	IC-IC-IC-LR-LR-SM	IC-S-S-LR-LR-SM	SM	LR	LR	LR	LC	LC	LR	LC	LC	(6,5)	9									3.2(1.9)--pm(>>,forward)
5ngm.cif1	337	Aa.A.171.|Aa.C.68.-Aa.G.101.	Aa.A.172.|Aa.G.67.-Aa.C.102.	AnsA_LnsL_RnsR	IC-S-S-LR-LR-SM	IC-S-S-LR-LR-SM	SM	LR	LR	LR	SM	SM	LR	SM	SM	(6,5)	9	5.8(4.0)--pm(>>,forward)				4.0(2.0)--pm(<<,backward)				5.6(2.6)--pm(>>,forward)
5ngm.cif1	337	Aa.A.172.|Aa.G.67.-Aa.C.102.	Aa.A.1456.|Aa.G.148.-Aa.A.174.	AsR	IC-S-S-LR-LR-SM	IC-IC-IC-LR-LR-SM	LR	SM	SM	LR	LR	LR	LR	LR	LR	(6,5)	9			1.6(0.2)--pm(>>,forward)
5ngm.cif1	338	Aa.A.381.|Aa.C.378.-Aa.G.399.	Aa.A.382.|Aa.G.379.-Aa.C.398.	AnsA_LnsL_RnR_RsL	IC-S-S-LC-LC-SM	IC-S-S-LC-LC-SM	SM	LC	LC	LC	SM	SM	LC	SM	SM	(3,2)	4	0.1(0.1)--pm(>>,forward)				0.8(0.2)--pm(>>,forward)			3.2(0.9)--mm(<>,outward)
5ngm.cif1	338	Aa.A.381.|Aa.C.378.-Aa.G.399.	Aa.A.490.|Aa.C.378.-Aa.G.399.	AsA_LeL_ReR	IC-S-S-LC-LC-SM	IC-S-S-LR-LR-SM	LR	LC	LC	LR	SM	SM	LR	SM	SM	(3,2)	4	6.0(5.1)--mm(<>,outward)
5ngm.cif1	338	Aa.A.382.|Aa.G.379.-Aa.C.398.	Aa.A.490.|Aa.C.378.-Aa.G.399.	LnsL_LsR_RnR	IC-S-S-LC-LC-SM	IC-S-S-LR-LR-SM	LR	LC	LC	LR	SM	SM	LR	SM	SM	(3,2)	4					0.8(0.2)--pm(<<,backward)	3.2(0.9)--mm(<>,outward)
5ngm.cif1	339	Aa.A.474.|Aa.G.216.-Aa.C.223.	Aa.A.474.|Aa.G.217.-Aa.C.223.	AeA_LnsL_ReR	HC-JC-JC-LR-LR-SM	HC-JC-JC-LR-LR-SM	SM	LR	LR	LR	SM	SM	LR	SM	SM	(2,2)	2					7.6(5.4)--pm(>>,forward)
5ngm.cif1	339	Aa.A.474.|Aa.G.216.-Aa.C.223.	Aa.A.475.|Aa.G.216.-Aa.C.223.	AnsA_LeL_ReR	HC-JC-JC-LR-LR-SM	HC-JC-JC-LR-LR-SM	SM	LR	LR	LR	SM	SM	LR	SM	SM	(2,2)	2	5.2(3.8)--pm(>>,forward)
5ngm.cif1	339	Aa.A.474.|Aa.G.217.-Aa.C.223.	Aa.A.475.|Aa.G.216.-Aa.C.223.	AnsA_LnsL_ReR	HC-JC-JC-LR-LR-SM	HC-JC-JC-LR-LR-SM	SM	LR	LR	LR	SM	SM	LR	SM	SM	(2,2)	2	5.2(3.8)--pm(>>,forward)				7.6(5.4)--pm(<<,backward)
5ngm.cif1	340	Aa.A.580.|Aa.C.20.-Aa.G.925.	Aa.A.873.|Aa.C.19.-Aa.G.926.	AsA_LnsL_RnsR	JP-S-S-LR-LR-SM	HPJP-S-S-LR-LR-SM	SM	LR	LR	LR	SM	SM	LR	SM	SM	(2,2)	4	1.7(0.4)--mm(<>,outward)				2.8(1.2)--pm(<<,backward)				2.2(0.8)--pm(>>,forward)
5ngm.cif1	341	Aa.A.581.|Aa.G.575.-Aa.C.892.	Aa.A.582.|Aa.G.576.-Aa.C.891.	AnsA_LnsL_RnR	JP-S-S-LR-LR-SM	JP-S-S-LR-LR-SM	SM	LR	LR	LR	SM	SM	LR	SM	SM	(2,2)	3	6.6(4.6)--pm(>>,forward)				3.9(1.3)--pm(>>,forward)
5ngm.cif1	342	Aa.A.615.|Aa.C.299.-Aa.G.317.	Aa.A.616.|Aa.G.300.-Aa.C.316.	AnsA_LnL_RnR_RsL	IC-S-S-LR-LR-SM	IC-S-S-LR-LR-SM	SM	LR	LR	LR	SM	SM	LR	SM	SM	(3,2)	3	3.8(3.2)--pm(>>,forward)							4.3(1.6)--mm(<>,outward)
5ngm.cif1	342	Aa.A.615.|Aa.C.299.-Aa.G.317.	Aa.A.617.|Aa.G.300.-Aa.C.316.	LnL_RnR_RsL	IC-S-S-LR-LR-SM	IC-S-S-LR-LR-SM	SM	LR	LR	LR	SM	SM	LR	SM	SM	(3,2)	3								4.3(1.6)--mm(<>,outward)
5ngm.cif1	342	Aa.A.616.|Aa.G.300.-Aa.C.316.	Aa.A.617.|Aa.G.300.-Aa.C.316.	AnsA_LeL_ReR	IC-S-S-LR-LR-SM	IC-S-S-LR-LR-SM	SM	LR	LR	LR	SM	SM	LR	SM	SM	(3,2)	3	5.5(2.6)--pm(>>,forward)
5ngm.cif1	343	Aa.A.629.|Aa.G.42.-Aa.C.409.	Aa.A.630.|Aa.G.43.-Aa.C.408.	AnsA_LnsL_RnsR	HC-S-S-LR-LR-SM	HC-S-S-LR-LR-SM	SM	LR	LR	LR	SM	SM	LR	SM	SM	(2,2)	3	5.2(3.8)--pm(>>,forward)				4.1(2.8)--pm(>>,forward)				2.2(0.8)--pm(<<,backward)
5ngm.cif1	344	Aa.A.650.|Aa.U.606.-Aa.A.648.	Aa.A.650.|Aa.U.606.-Aa.A.649.	AeA_AnR_LeL_RnsR	BC-S-S-LC-LC-SM	BC-S-BC-LC-SM-LC	SM	LC	SM	LC	SM	LC	LC	SM	LC	(1,2)	3									7.0(5.3)--pm(>>,forward)
5ngm.cif1	345	Aa.A.703.|Aa.G.794.-Aa.C.804.	Aa.A.704.|Aa.G.793.-Aa.C.805.	AnsA_LnsL_RnsR	HC-S-S-LR-LR-SM	HC-S-S-LR-LR-SM	SM	LR	LR	LR	SM	SM	LR	SM	SM	(2,2)	3	5.9(4.2)--pm(>>,forward)				2.1(0.7)--pm(<<,backward)				0.7(0.1)--pm(>>,forward)
5ngm.cif1	346	Aa.A.736.|Aa.C.586.-Aa.G.771.	Aa.A.737.|Aa.G.585.-Aa.C.772.	AnsA_LnsL_RnsR	HC-S-S-LR-LR-SM	HC-S-S-LR-LR-SM	SM	LR	LR	LR	SM	SM	LR	SM	SM	(2,2)	3	4.0(3.2)--pm(>>,forward)				7.3(4.3)--pm(<<,backward)				5.8(2.7)--pm(>>,forward)
5ngm.cif1	347	Aa.A.774.|Aa.C.1521.-Aa.G.1536.	Aa.A.775.|Aa.G.1522.-Aa.C.1535.	AnsA_LnL_RnsR_RsL	JP-S-S-LR-LR-SM	JP-S-S-LR-LR-SM	SM	LR	LR	LR	SM	SM	LR	SM	SM	(2,2)	3	3.6(1.4)--pm(>>,forward)							2.4(0.4)--mm(<>,outward)	1.8(0.7)--pm(<<,backward)
5ngm.cif1	348	Aa.A.922.|Aa.U.13.-Aa.G.23.	Aa.A.923.|Aa.G.894.-Aa.C.921.	AnA_AnsR	JP-S-S-LC-LC-SM	JP-S-S-LC-LC-SM	SM	LC	LC	LC	LR	LR	LC	LR	LR	(2,2)	5			2.4(0.6)--pm(<<,backward)
5ngm.cif1	349	Aa.A.967.|Aa.C.994.-Aa.G.1230.	Aa.A.968.|Aa.C.993.-Aa.G.1231.	AnsA_LnsL_RnsR	JC-S-S-LC-LC-SM	JC-S-S-LC-LC-SM	SM	LC	LC	LC	SM	SM	LC	SM	SM	(2,2)	3	6.6(4.7)--pm(>>,forward)				2.4(0.7)--pm(<<,backward)				4.1(2.6)--pm(>>,forward)
5ngm.cif1	350	Aa.A.1005.|Aa.G.1002.-Aa.C.1056.	Aa.A.1055.|Aa.G.1002.-Aa.C.1056.	LeL_ReR_RnA	JC-JC-JC-SM-SM-SM	JC-JC-JC-SM-SM-SM	SM	SM	SM	SM	SM	SM	SM	SM	SM	(2,1)	2
5ngm.cif1	351	Aa.A.1260.|Aa.G.1363.-Aa.C.1379.	Aa.A.1261.|Aa.G.1363.-Aa.C.1379.	AnsA_LeL_ReR	IC-S-S-LR-LR-SM	IC-S-S-LR-LR-SM	SM	LR	LR	LR	SM	SM	LR	SM	SM	(4,3)	4	6.8(4.8)--pm(>>,forward)
5ngm.cif1	351	Aa.A.1260.|Aa.G.1363.-Aa.C.1379.	Aa.A.1298.|Aa.C.1362.-Aa.G.1380.	LnsL_RnsR	IC-S-S-LR-LR-SM	IC-S-S-LR-LR-SM	SM	LR	LR	LR	SM	SM	LR	SM	SM	(4,3)	4					2.8(0.9)--pm(<<,backward)				2.7(0.8)--pm(>>,forward)
5ngm.cif1	351	Aa.A.1261.|Aa.G.1363.-Aa.C.1379.	Aa.A.1298.|Aa.C.1362.-Aa.G.1380.	LnsL_RnsR	IC-S-S-LR-LR-SM	IC-S-S-LR-LR-SM	SM	LR	LR	LR	SM	SM	LR	SM	SM	(4,3)	4					2.8(0.9)--pm(<<,backward)				2.7(0.8)--pm(>>,forward)
5ngm.cif1	351	Aa.A.1298.|Aa.C.1362.-Aa.G.1380.	Aa.A.1299.|Aa.U.1361.-Aa.G.1381.	AnsA_LnL_RnsR	IC-S-S-LR-LR-SM	IC-S-S-LR-LR-SM	SM	LR	LR	LR	SM	SM	LR	SM	SM	(4,3)	4	4.1(3.4)--pm(>>,forward)								2.0(0.6)--pm(>>,forward)
5ngm.cif1	352	Aa.A.1428.|AA.G.1975.-AA.C.1985.	Aa.A.1494.|AA.C.1974.-AA.G.1986.	AsA_LnL_LsR_RnR	IC-S-S-LR-LR-SM	IC-S-S-LR-LR-SM	SM	LR	LR	LR	SM	SM	LR	SM	SM	(2,2)	4	3.2(1.4)--mm(<>,outward)					6.1(3.2)--mm(<>,outward)
5ngm.cif1	353	Aa.A.1443.|Aa.G.326.-Aa.C.343.	Aa.A.1444.|Aa.G.327.-Aa.C.342.	AnsA_LnsL_RnsR	IC-S-S-LR-LR-SM	IC-S-S-LR-LR-SM	SM	LR	LR	LR	SM	SM	LR	SM	SM	(2,2)	3	6.2(4.1)--pm(>>,forward)				3.0(1.4)--pm(>>,forward)				2.3(0.9)--pm(<<,backward)
5ngm.cif1	337	Aa.A.1456.|Aa.G.148.-Aa.A.174.	Aa.A.1457.|Aa.G.147.-Aa.C.175.	AnsA_LnsL_RnsR	IC-IC-IC-LR-LR-SM	IC-S-S-LR-LR-SM	SM	LR	LR	LR	LC	LC	LR	LC	LC	(6,5)	9	3.5(3.1)--pm(>>,forward)				3.9(1.8)--pm(<<,backward)				6.0(3.4)--pm(>>,forward)
5swd.cif1	354	B.A.33.|B.G.37.-B.C.61.	B.A.65.|B.G.37.-B.C.61.	LeL_ReR	HP-S-S-LC-LC-SM	HP-S-S-LC-LC-SM	LR	LC	LC	LC	SM	SM	LC	SM	SM	(3,2)	4
5swd.cif1	354	B.A.33.|B.G.37.-B.C.61.	B.A.66.|B.G.38.-B.C.60.	LnsL_RnsR	HP-S-S-LC-LC-SM	HP-S-S-LC-LC-SM	LR	LC	LC	LC	SM	SM	LC	SM	SM	(3,2)	4					7.1(5.0)--pm(>>,forward)				1.5(0.3)--pm(<<,backward)
5swd.cif1	354	B.A.65.|B.G.37.-B.C.61.	B.A.66.|B.G.38.-B.C.60.	AnsA_LnsL_RnsR	HP-S-S-LC-LC-SM	HP-S-S-LC-LC-SM	SM	LC	LC	LC	SM	SM	LC	SM	SM	(3,2)	4	6.4(4.6)--pm(>>,forward)				7.1(5.0)--pm(>>,forward)				1.5(0.3)--pm(<<,backward)
5t2a.cif1	355	A.A.1098.|B.U.996.-B.G.1008.	A.A.1099.|B.G.995.-B.C.1009.	AnsA_LnsL_RnsR	IC-S-S-LR-LR-SM	IC-S-S-LR-LR-SM	SM	LR	LR	LR	SM	SM	LR	SM	SM	(2,2)	3	5.7(4.1)--pm(>>,forward)				5.6(2.1)--pm(<<,backward)				5.3(2.3)--pm(>>,forward)
5t2a.cif1	356	A.A.1186.|B.U.1200.-B.G.1237.	A.A.1187.|B.C.1199.-B.A.1238.	AnsA_LnsL_RnsR	HC-JC-JC-LR-LR-SM	HC-JC-JC-LR-LR-SM	SM	LR	LR	LR	SM	SM	LR	SM	SM	(2,2)	3	5.1(3.7)--pm(>>,forward)				4.2(2.0)--pm(<<,backward)				5.7(3.2)--pm(>>,forward)
5t2a.cif1	357	A.A.1265.|B.G.1207.-B.C.1229.	A.A.1266.|B.G.1208.-B.U.1228.	AnsA_LnsL_RnR	IP-S-S-LR-LR-SM	IP-S-S-LR-LR-SM	SM	LR	LR	LR	SM	SM	LR	SM	SM	(3,4)	4	1.3(1.1)--pm(>>,forward)				1.9(0.5)--pm(>>,forward)
5t2a.cif1	357	A.A.1265.|B.G.1207.-B.C.1229.	A.A.1364.|B.C.1206.-B.G.1230.	LnL_LsR_RnR	IP-S-S-LR-LR-SM	IP-S-S-LR-LR-SM	SM	LR	LR	LR	SM	SM	LR	SM	SM	(3,4)	4						3.8(1.2)--mm(<>,outward)
5t2a.cif1	357	A.A.1364.|B.G.1205.-B.C.1231.	A.A.1364.|B.C.1206.-B.G.1230.	AeA_LnsL_RnsR	IP-S-S-LR-LR-SM	IP-S-S-LR-LR-SM	SM	LR	LR	LR	SM	SM	LR	SM	SM	(3,4)	4					7.3(4.5)--pm(>>,forward)				6.1(3.0)--pm(<<,backward)
5t2a.cif1	358	A.A.1365.|B.C.1259.-B.G.1311.	A.A.1366.|B.C.1258.-B.G.1312.	AnsA_LnL_RnsR	IP-S-S-LR-LR-SM	IP-S-S-LR-LR-SM	SM	LR	LR	LR	SM	SM	LR	SM	SM	(2,2)	3	5.5(3.8)--pm(>>,forward)								3.2(1.2)--pm(>>,forward)
5t2a.cif1	359	B.A.92.|B.G.89.-B.C.516.	B.A.93.|B.G.89.-B.C.516.	AnsA_LeL_ReR	JC-JC-JC-SM-SM-SM	JC-JC-JC-SM-SM-SM	SM	SM	SM	SM	SM	SM	SM	SM	SM	(2,1)	2	5.4(4.0)--pm(>>,forward)
5t2a.cif1	360	B.A.326.|B.G.1331.-B.U.1349.	B.A.464.|B.A.1332.-B.U.1348.	LnsL_RnR	HC-S-S-LR-LR-SM	JC-S-S-LR-LR-SM	LR	LR	LR	LR	SM	SM	LR	SM	SM	(2,2)	4					5.2(2.3)--pm(>>,forward)
5t2a.cif1	361	B.A.396.|B.U.611.-B.A.964.	B.A.397.|B.G.612.-B.C.963.	AnsA_LnL_RnsR_RsL	IC-S-S-LR-LR-SM	IC-S-S-LR-LR-SM	SM	LR	LR	LR	SM	SM	LR	SM	SM	(3,2)	4	5.7(4.1)--pm(>>,forward)							1.1(0.5)--mm(<>,outward)	0.3(0.1)--pm(<<,backward)
5t2a.cif1	361	B.A.396.|B.U.611.-B.A.964.	B.A.415.|B.U.611.-B.A.964.	AsA_LeL_ReR	IC-S-S-LR-LR-SM	IC-S-S-LR-LR-SM	SM	LR	LR	LR	SM	SM	LR	SM	SM	(3,2)	4	3.2(0.9)--mm(<>,outward)
5t2a.cif1	361	B.A.397.|B.G.612.-B.C.963.	B.A.415.|B.U.611.-B.A.964.	LnL_LsR_RnsR	IC-S-S-LR-LR-SM	IC-S-S-LR-LR-SM	SM	LR	LR	LR	SM	SM	LR	SM	SM	(3,2)	4						1.1(0.5)--mm(<>,outward)			0.3(0.1)--pm(>>,forward)
5t2a.cif1	362	B.A.426.|B.G.334.-B.C.368.	B.A.496.|B.G.333.-B.U.369.	AsA_LnsL_RnsR	BC-S-S-LR-LR-SM	JC-S-S-LR-LR-SM	LR	LR	LR	LR	SM	SM	LR	SM	SM	(4,4)	7	1.6(1.4)--mp(<<,backward)				3.9(2.4)--pm(<<,backward)				2.6(1.0)--pm(>>,forward)
5t2a.cif1	363	B.A.453.|B.C.379.-B.G.429.	B.A.454.|B.C.378.-B.G.430.	AnsA_LnsL_RnsR	JC-S-S-LC-LC-SM	JC-S-S-LC-LC-SM	SM	LC	LC	LC	SM	SM	LC	SM	SM	(2,2)	3	6.7(4.9)--pm(>>,forward)				1.1(0.4)--pm(<<,backward)				2.8(1.3)--pm(>>,forward)
5t2a.cif1	362	B.A.458.|B.U.374.-B.G.499.	B.A.495.|B.C.375.-B.G.498.	AsA_LnsL_RnR	JC-S-S-LC-LC-SM	JC-S-S-LC-LC-SM	SM	LC	LC	LC	SM	SM	LC	SM	SM	(4,4)	7	3.8(2.4)--mm(<>,outward)				2.2(0.9)--pm(>>,forward)
5t2a.cif1	364	B.A.478.|B.G.1291.-B.C.1303.	B.A.479.|B.G.1292.-B.C.1302.	AnsA_LnsL_RnR	HC-S-S-LR-LR-SM	HC-S-S-LR-LR-SM	SM	LR	LR	LR	SM	SM	LR	SM	SM	(2,2)	3	7.0(5.0)--pm(>>,forward)				3.7(1.4)--pm(>>,forward)
5t2a.cif1	362	B.A.495.|B.C.375.-B.G.498.	B.A.496.|B.G.333.-B.U.369.	AnA_RsA	JC-S-S-LC-LC-SM	JC-S-S-LR-LR-SM	SM	LR	LR	LC	LR	LR	LC	LR	LR	(4,4)	7							2.1(0.6)--mm(<>,outward)
5t2a.cif1	365	B.A.1005.|A.U.1181.-A.G.1191.	B.A.1006.|A.C.1182.-A.G.1190.	AnsA_LnL_RnsR	HC-S-S-LR-LR-SM	HC-S-S-LR-LR-SM	SM	LR	LR	LR	SM	SM	LR	SM	SM	(2,2)	3	2.7(1.8)--pm(>>,forward)								4.1(2.4)--pm(<<,backward)
5t2a.cif1	366	C.A.92.|B.G.569.-B.C.1367.	C.A.93.|B.G.569.-B.C.1367.	AnsA_LeL_ReR	JI-S-S-LC-LC-SM	JI-S-S-LC-LC-SM	SM	LC	LC	LC	SM	SM	LC	SM	SM	(2,1)	3	5.6(3.4)--pm(>>,forward)
5t2a.cif1	367	H.A.69.|B.C.124.-B.A.292.	H.A.87.|B.G.123.-B.C.293.	AsA_LnsL_RnsR	IC-IC-IC-LR-LR-SM	IC-S-S-LR-LR-SM	SM	LR	LR	LR	LC	LC	LR	LC	LC	(2,2)	6	2.6(1.1)--mm(<>,outward)				7.1(4.0)--pm(<<,backward)				6.0(4.1)--pm(>>,forward)
5t2a.cif1	368	2.A.2071.|B.U.474.-B.A.484.	2.A.2149.|B.C.473.-B.G.485.	AsA_LnL_RnsR	IC-S-S-LR-LR-SM	IC-S-S-LR-LR-SM	SM	LR	LR	LR	SM	SM	LR	SM	SM	(2,2)	4	4.6(3.1)--mm(<>,outward)								1.9(1.8)--pm(>>,forward)
5t5h.cif1	369	A.A.33.|A.G.976.-A.C.1098.	A.A.34.|A.G.976.-A.C.1098.	AnsA_LeL_ReR	HC-S-S-LR-LR-SM	HC-S-S-LR-LR-SM	SM	LR	LR	LR	SM	SM	LR	SM	SM	(2,1)	3	6.6(4.7)--pm(>>,forward)
5t5h.cif1	370	A.A.69.|A.A.344.-A.U.355.	A.A.70.|A.G.345.-A.C.354.	AnsA_LnsL_RnR	HC-S-S-LR-LR-SM	HC-S-S-LR-LR-SM	SM	LR	LR	LR	SM	SM	LR	SM	SM	(2,2)	3	5.9(4.3)--pm(>>,forward)				4.6(3.0)--pm(>>,forward)
5t5h.cif1	371	A.A.192.|A.C.249.-A.G.253.	A.A.193.|A.C.248.-A.G.263.	AnsA_LnL_RsR	JI-HP-HP-LR-LR-SM	JI-S-S-LC-LC-SM	SM	LC	LC	LR	LC	LC	LR	LC	LC	(2,2)	4	8.0(5.8)--pm(>>,forward)								3.0(0.4)--pm(>>,forward)
5t5h.cif1	372	A.A.789.|A.C.969.-A.G.1108.	A.A.1660.|A.C.970.-A.G.1107.	AsA_LnL_RnsR	JC-S-S-LC-LC-SM	JC-S-S-LC-LC-SM	SM	LC	LC	LC	SM	SM	LC	SM	SM	(3,3)	7	1.8(0.5)--mm(<>,outward)								3.7(2.2)--pm(<<,backward)
5t5h.cif1	373	A.A.1312.|B.C.1395.-B.A.1434.	A.A.1313.|B.C.1395.-B.A.1434.	AnsA_LeL_ReR	HC-JC-JC-LR-LR-SM	HC-JC-JC-LR-LR-SM	SM	LR	LR	LR	SM	SM	LR	SM	SM	(3,2)	3	5.1(3.4)--pm(>>,forward)
5t5h.cif1	373	A.A.1312.|B.C.1395.-B.A.1434.	B.A.719.|B.G.1394.-B.U.1435.	LnsL_RnsR	HC-JC-JC-LR-LR-SM	HC-JC-JC-LR-LR-SM	LR	LR	LR	LR	SM	SM	LR	SM	SM	(3,2)	3					6.9(4.0)--pm(<<,backward)				5.0(3.6)--pm(>>,forward)
5t5h.cif1	373	A.A.1313.|B.C.1395.-B.A.1434.	B.A.719.|B.G.1394.-B.U.1435.	LnsL_RnsR	HC-JC-JC-LR-LR-SM	HC-JC-JC-LR-LR-SM	LR	LR	LR	LR	SM	SM	LR	SM	SM	(3,2)	3					6.9(4.0)--pm(<<,backward)				5.0(3.6)--pm(>>,forward)
5t5h.cif1	374	A.A.1336.|A.G.1300.-A.C.1324.	A.A.1337.|A.C.1301.-A.G.1323.	AnsA_LnsL_RnsR	HC-S-S-LR-LR-SM	HC-S-S-LR-LR-SM	SM	LR	LR	LR	SM	SM	LR	SM	SM	(2,2)	3	7.0(5.0)--pm(>>,forward)				7.1(4.4)--pm(>>,forward)				5.3(2.2)--pm(<<,backward)
5t5h.cif1	375	A.A.1361.|A.G.1354.-A.C.1524.	A.A.1362.|A.G.1355.-A.C.1523.	AnsA_LnsL_RnR	HP-S-S-LR-LR-SM	HP-S-S-LR-LR-SM	SM	LR	LR	LR	SM	SM	LR	SM	SM	(2,2)	3	7.0(4.8)--pm(>>,forward)				4.3(2.2)--pm(>>,forward)
5t5h.cif1	376	A.A.1491.|B.C.1455.-B.G.1507.	A.A.1492.|B.C.1454.-B.G.1508.	AnsA_LnL_RnsR	HP-S-S-LR-LR-SM	HP-S-S-LR-LR-SM	SM	LR	LR	LR	SM	SM	LR	SM	SM	(2,2)	3	4.8(3.6)--pm(>>,forward)								3.1(0.9)--pm(>>,forward)
5t5h.cif1	372	A.A.1660.|A.C.970.-A.G.1107.	B.A.748.|A.C.971.-A.U.1106.	LnsL_RnR	JC-S-S-LC-LC-SM	JCJP-IC-IC-LR-LR-SM	LR	LR	LR	LR	LC	LC	LR	LC	LC	(3,3)	7					0.6(0.2)--pm(>>,forward)
5t5h.cif1	377	A.A.1925.|A.C.1773.-A.G.1928.	E.A.198.|A.C.1773.-A.G.1928.	AsR_LeL_ReR	JP-JP-JP-SM-SM-SM	ICJP-JP-JP-LR-LR-SM	LR	SM	SM	LR	SM	SM	LR	SM	SM	(3,1)	3			6.7(4.4)--pm(>>,forward)
5t5h.cif1	377	A.A.1925.|A.C.1773.-A.G.1928.	E.A.199.|A.C.1773.-A.G.1928.	AsR_LeL_ReR	JP-JP-JP-SM-SM-SM	ICJP-JP-JP-LR-LR-SM	LR	SM	SM	LR	SM	SM	LR	SM	SM	(3,1)	3			6.7(4.4)--pm(>>,forward)
5t5h.cif1	378	B.A.489.|B.G.1527.-B.U.1545.	B.A2M.627.|B.A.1528.-B.U.1544.	LnsL_RnsR	HC-S-S-LR-LR-SM	JC-S-S-LR-LR-SM	LR	LR	LR	LR	SM	SM	LR	SM	SM	(2,2)	4					5.0(2.2)--pm(>>,forward)				1.3(0.2)--pm(<<,backward)
5t5h.cif1	379	B.A.589.|B.G.497.-B.C.531.	B.A.659.|B.G.497.-B.C.531.	AsA_LeL_ReR	BC-S-S-LR-LR-SM	JC-S-S-LR-LR-SM	LR	LR	LR	LR	SM	SM	LR	SM	SM	(3,2)	6	2.4(2.2)--mp(<<,backward)
5t5h.cif1	380	B.A.616.|B.C.542.-B.G.592.	B.A.617.|B.C.541.-B.G.593.	AnsA_LnL_RnsR	JC-S-S-LC-LC-SM	JC-S-S-LC-LC-SM	SM	LC	LC	LC	SM	SM	LC	SM	SM	(2,2)	3	6.5(4.7)--pm(>>,forward)								1.7(0.4)--pm(>>,forward)
5t5h.cif1	381	B.A.641.|B.G.1487.-B.C.1499.	B.A.642.|B.G.1488.-B.C.1498.	AnsA_LnsL_RnR	HC-S-S-LR-LR-SM	HC-S-S-LR-LR-SM	SM	LR	LR	LR	SM	SM	LR	SM	SM	(2,2)	3	7.5(5.4)--pm(>>,forward)				3.6(1.8)--pm(>>,forward)
5t5h.cif1	379	B.A.658.|B.C.538.-B.G.661.	B.A.659.|B.G.497.-B.C.531.	AnA_RsA	JC-S-S-LC-LC-SM	JC-S-S-LR-LR-SM	SM	LR	LR	LC	LR	LR	LC	LR	LR	(3,2)	6							2.1(1.1)--mm(<>,outward)
5t5h.cif1	382	B.A.1201.|A.U.1307.-A.G.1317.	B.A.1202.|A.C.1308.-A.OMG.1316.	AnsA_LnL_RnsR	HC-S-S-LR-LR-SM	HC-S-S-LR-LR-SM	SM	LR	LR	LR	SM	SM	LR	SM	SM	(2,2)	3	1.1(0.5)--pm(>>,forward)								3.6(1.9)--pm(<<,backward)
5t5h.cif1	383	B.A.1255.|B.C.1189.-B.G.1207.	B.A.1317.|B.U.1188.-B.G.1208.	AsA_LnL_LsR_RnsR	HC-S-S-LR-LR-SM	JCJP-S-S-LC-LC-SM	LR	LR	LR	LC	SM	SM	LC	SM	SM	(2,2)	4	2.4(0.9)--mm(<>,outward)					2.2(0.3)--mm(<>,outward)			2.6(0.7)--pm(>>,forward)
5t5h.cif1	384	C.A.59.|C.C.45.-C.G.58.	C.A.61.|C.G.46.-C.C.57.	AsA_LnsL_RnR_RsL	HP-S-S-LC-LC-SM	HP-S-S-LC-LC-SM	SM	LC	LC	LC	SM	SM	LC	SM	SM	(2,2)	3	2.5(1.5)--pm(>>,forward)				0.3(0.1)--pm(>>,forward)			3.4(1.0)--mm(<>,outward)
5t5h.cif1	385	D.A.50.|D.C.29.-D.G.48.	D.A.54.|D.C.28.-D.G.51.	AnsR_LnsL	BC-S-S-LC-LC-SM	IC-S-S-LC-LC-SM	LR	LC	LC	LR	LR	LR	LR	LR	LR	(3,3)	6			4.4(1.7)--pm(>>,forward)		2.2(0.4)--pm(<<,backward)
5t5h.cif1	385	D.A.54.|D.A.27.-D.U.52.	D.A.54.|D.C.28.-D.G.51.	AeA_LnsL_RnsR	IC-S-S-LC-LC-SM	IC-S-S-LC-LC-SM	SM	LC	LC	LC	SM	SM	LC	SM	SM	(3,3)	6					4.8(3.2)--pm(>>,forward)				7.1(4.2)--pm(<<,backward)
5t5h.cif1	385	D.A.54.|D.A.27.-D.U.52.	D.A.55.|D.A.27.-D.U.52.	AnsA_LeL_ReR	IC-S-S-LC-LC-SM	IC-S-S-LC-LC-SM	SM	LC	LC	LC	SM	SM	LC	SM	SM	(3,3)	6	6.0(3.6)--pm(>>,forward)
5t5h.cif1	385	D.A.54.|D.C.28.-D.G.51.	D.A.55.|D.A.27.-D.U.52.	AnsA_LnsL_RnsR	IC-S-S-LC-LC-SM	IC-S-S-LC-LC-SM	SM	LC	LC	LC	SM	SM	LC	SM	SM	(3,3)	6	6.0(3.6)--pm(>>,forward)				4.8(3.2)--pm(<<,backward)				7.1(4.2)--pm(>>,forward)
5t5h.cif1	386	E.A.7.|E.C.101.-E.G.131.	E.A.8.|E.C.100.-E.G.132.	AnsA_LnL_RnsR	HC-S-S-LR-LR-SM	HC-S-S-LR-LR-SM	SM	LR	LR	LR	SM	SM	LR	SM	SM	(2,2)	3	6.8(4.5)--pm(>>,forward)								3.9(2.1)--pm(>>,forward)
5t5h.cif1	387	E.A.68.|A.C.1934.-A.G.1954.	E.A.69.|A.C.1933.-A.A.1955.	AnsA_LnL_RnsR	JCJP-S-S-LR-LR-SM	JCJP-JP-JP-LR-LR-SM	SM	LR	LR	LR	LC	LC	LR	LC	LC	(2,2)	5	1.9(1.5)--pm(>>,forward)								4.3(3.1)--pm(>>,forward)
5t5h.cif1	377	E.A.198.|A.C.1773.-A.G.1928.	E.A.199.|A.C.1773.-A.G.1928.	AnsA_LeL_ReR	ICJP-JP-JP-LR-LR-SM	ICJP-JP-JP-LR-LR-SM	SM	LR	LR	LR	SM	SM	LR	SM	SM	(3,1)	3	6.1(4.3)--pm(>>,forward)
5t83.cif1	388	A.A.82.|A.G.16.-A.C.41.	A.A.83.|A.G.15.-A.C.42.	AnsA_LnsL_RnR	HC-S-S-LR-LR-SM	HC-S-S-LR-LR-SM	SM	LR	LR	LR	SM	SM	LR	SM	SM	(2,2)	3	4.5(3.6)--pm(>>,forward)				3.7(2.0)--pm(<<,backward)
5tbw.cif1	389	1.A.34.|1.G.809.-1.C.931.	1.A.35.|1.G.809.-1.C.931.	AnsA_LeL_ReR	HC-S-S-LR-LR-SM	HC-S-S-LR-LR-SM	SM	LR	LR	LR	SM	SM	LR	SM	SM	(2,1)	3	5.7(4.1)--pm(>>,forward)
5tbw.cif1	390	1.A.43.|1.C.2420.-1.G.2610.	1.A.2803.|1.A.2419.-1.U.2611.	AsA_LnsL_RnsR	HC-S-S-LR-LR-SM	JI-S-S-LC-LC-SM	LR	LR	LR	LC	SM	SM	LC	SM	SM	(2,2)	4	2.4(0.5)--mm(<>,outward)				3.7(2.2)--pm(<<,backward)				7.4(4.1)--pm(>>,forward)
5tbw.cif1	391	1.A.67.|1.G.300.-1.C.315.	1.A.296.|1.G.299.-1.U.316.	LnsL_RnsR	JI-S-S-LR-LR-SM	JC-S-S-LC-LC-SM	LR	LR	LR	LC	SM	SM	LC	SM	SM	(2,2)	4					5.1(2.4)--pm(<<,backward)				3.3(1.0)--pm(>>,forward)
5tbw.cif1	392	1.A.70.|1.U.302.-1.A.313.	1.A.71.|1.G.303.-1.C.312.	AnsA_LnL_RnR_RsL	HC-S-S-LR-LR-SM	HC-S-S-LR-LR-SM	SM	LR	LR	LR	SM	SM	LR	SM	SM	(2,2)	3	5.2(3.9)--pm(>>,forward)							3.1(1.5)--mm(<>,outward)
5tbw.cif1	393	1.A.284.|1.C.2776.-1.G.2784.	1.A.2223.|1.A.306.-1.U.2783.	RnsR	HC-S-S-LR-LR-SM	HC-S-S-LR-LR-SM	LR	LR	LR	LR	LR	LR	LR	LR	LR	(4,3)	6									2.1(1.3)--pm(<<,backward)
5tbw.cif1	393	1.A.284.|1.C.2776.-1.G.2784.	1.A.2224.|1.A.306.-1.U.2783.	RnsR	HC-S-S-LR-LR-SM	HC-S-S-LR-LR-SM	LR	LR	LR	LR	LR	LR	LR	LR	LR	(4,3)	6									2.1(1.3)--pm(<<,backward)
5tbw.cif1	394	1.A.408.|1.C.655.-1.G.1440.	1.A.409.|1.C.654.-1.G.1441.	AnsA_LnL_RnsR	JCJP-S-S-LC-LC-SM	JCJP-S-S-LC-LC-SM	SM	LC	LC	LC	SM	SM	LC	SM	SM	(2,2)	3	5.1(3.9)--pm(>>,forward)								4.1(2.7)--pm(>>,forward)
5tbw.cif1	395	1.A.660.|1.C.802.-1.G.941.	1.A.1435.|1.C.803.-1.G.940.	AsA_LnL_RnsR	JC-S-S-LC-LC-SM	JC-S-S-LC-LC-SM	SM	LC	LC	LC	SM	SM	LC	SM	SM	(2,2)	4	1.8(0.6)--mm(<>,outward)								4.0(2.8)--pm(<<,backward)
5tbw.cif1	396	1.A.846.|A.C.627.-A.G.972.	1.A.847.|A.C.627.-A.G.972.	AnsA_LeL_ReR	HC-S-S-LR-LR-SM	HC-S-S-LR-LR-SM	SM	LR	LR	LR	SM	SM	LR	SM	SM	(2,1)	3	6.1(3.4)--pm(>>,forward)
5tbw.cif1	397	1.A.1002.|1.A.998.-1.U.1050.	1.A.1003.|1.G.999.-1.C.1049.	AnA_LnsL_RnsR	IC-S-S-LC-LC-SM	IC-S-S-LC-LC-SM	SM	LC	LC	LC	SM	SM	LC	SM	SM	(2,2)	3					3.0(2.7)--pm(>>,forward)				1.2(0.2)--pm(<<,backward)
5tbw.cif1	398	1.A.1047.|1.U.2633.-1.G.2645.	1.A.1048.|1.G.2632.-1.C.2646.	AnsA_LnsL_RnsR	IC-S-S-LR-LR-SM	IC-S-S-LR-LR-SM	SM	LR	LR	LR	SM	SM	LR	SM	SM	(2,2)	3	5.7(4.1)--pm(>>,forward)				7.0(3.2)--pm(<<,backward)				5.8(2.8)--pm(>>,forward)
5tbw.cif1	399	1.A.1129.|1.C.2825.-1.A.2864.	1.A.1129.|1.U.2826.-1.G.2863.	AeA_LnsL_RnsR	HC-JC-JC-LR-LR-SM	HC-JC-JC-LR-LR-SM	SM	LR	LR	LR	SM	SM	LR	SM	SM	(2,2)	3					1.9(0.7)--pm(>>,forward)				6.0(3.8)--pm(<<,backward)
5tbw.cif1	399	1.A.1129.|1.C.2825.-1.A.2864.	1.A.1130.|1.C.2825.-1.A.2864.	AnsA_LeL_ReR	HC-JC-JC-LR-LR-SM	HC-JC-JC-LR-LR-SM	SM	LR	LR	LR	SM	SM	LR	SM	SM	(2,2)	3	5.7(4.1)--pm(>>,forward)
5tbw.cif1	399	1.A.1129.|1.U.2826.-1.G.2863.	1.A.1130.|1.C.2825.-1.A.2864.	AnsA_LnsL_RnsR	HC-JC-JC-LR-LR-SM	HC-JC-JC-LR-LR-SM	SM	LR	LR	LR	SM	SM	LR	SM	SM	(2,2)	3	5.7(4.1)--pm(>>,forward)				1.9(0.7)--pm(<<,backward)				6.0(3.8)--pm(>>,forward)
5tbw.cif1	400	1.A.1153.|1.G.1117.-1.C.1141.	1.A.1154.|1.C.1118.-1.G.1140.	AnsA_LnsL_RnsR	HC-S-S-LR-LR-SM	HC-S-S-LR-LR-SM	SM	LR	LR	LR	SM	SM	LR	SM	SM	(2,2)	3	6.3(4.1)--pm(>>,forward)				7.3(4.6)--pm(>>,forward)				4.6(1.8)--pm(<<,backward)
5tbw.cif1	401	1.A.1169.|1.G.1147.-1.C.1156.	1.A.1169.|1.A.1170.-1.U.1329.	AeA_AnsL	IC-S-S-LR-LR-SM	IC-IC-IC-SM-SM-SM	SM	SM	SM	LR	LR	LR	LR	LR	LR	(4,4)	5		6.5(4.9)--pm(>>,forward)
5tbw.cif1	401	1.A.1169.|1.G.1147.-1.C.1156.	1.A.1170.|1.G.1147.-1.C.1156.	AnsA_LeL_ReR	IC-S-S-LR-LR-SM	IC-S-S-LR-LR-SM	SM	LR	LR	LR	SM	SM	LR	SM	SM	(4,4)	5	6.5(4.9)--pm(>>,forward)
5tbw.cif1	401	1.A.1169.|1.G.1147.-1.C.1156.	1.A.1197.|1.G.1148.-1.C.1155.	LnsL_RnR	IC-S-S-LR-LR-SM	IP-S-S-LR-LR-SM	LR	LR	LR	LR	SM	SM	LR	SM	SM	(4,4)	5					3.4(1.7)--pm(>>,forward)
5tbw.cif1	401	1.A.1169.|1.G.1147.-1.C.1156.	1.A.1330.|1.C.1146.-1.G.1157.	AsA_LnL_LsR_RnR	IC-S-S-LR-LR-SM	IC-S-S-LR-LR-SM	SM	LR	LR	LR	SM	SM	LR	SM	SM	(4,4)	5	3.0(2.1)--mm(<>,outward)					4.9(2.0)--mm(<>,outward)
5tbw.cif1	401	1.A.1169.|1.A.1170.-1.U.1329.	1.A.1170.|1.G.1147.-1.C.1156.	AnsA_LeA	IC-IC-IC-SM-SM-SM	IC-S-S-LR-LR-SM	SM	LR	LR	SM	LR	LR	SM	LR	LR	(4,4)	5	6.5(4.9)--pm(>>,forward)
5tbw.cif1	401	1.A.1169.|1.A.1170.-1.U.1329.	1.A.1330.|1.C.1146.-1.G.1157.	AsA_RnA	IC-IC-IC-SM-SM-SM	IC-S-S-LR-LR-SM	SM	LR	LR	SM	LR	LR	SM	LR	LR	(4,4)	5	3.0(2.1)--mm(<>,outward)
5tbw.cif1	401	1.A.1170.|1.G.1147.-1.C.1156.	1.A.1197.|1.G.1148.-1.C.1155.	LnsL_RnR	IC-S-S-LR-LR-SM	IP-S-S-LR-LR-SM	LR	LR	LR	LR	SM	SM	LR	SM	SM	(4,4)	5					3.4(1.7)--pm(>>,forward)
5tbw.cif1	401	1.A.1170.|1.G.1147.-1.C.1156.	1.A.1330.|1.C.1146.-1.G.1157.	LnL_LsR_RnR	IC-S-S-LR-LR-SM	IC-S-S-LR-LR-SM	SM	LR	LR	LR	SM	SM	LR	SM	SM	(4,4)	5						4.9(2.0)--mm(<>,outward)
5tbw.cif1	402	1.A.1203.|1.A.2833.-1.U.2855.	1.A.1204.|1.G.2834.-1.U.2854.	AnsA_LnsL_RnR_RsL	IP-S-S-LR-LR-SM	IP-S-S-LR-LR-SM	SM	LR	LR	LR	SM	SM	LR	SM	SM	(3,4)	4	1.7(1.5)--pm(>>,forward)				0.7(0.5)--pm(>>,forward)			2.4(0.3)--mm(<>,outward)
5tbw.cif1	402	1.A.1203.|1.A.2833.-1.U.2855.	1.A.1302.|1.C.2832.-1.G.2856.	LnL_LsR_RnR	IP-S-S-LR-LR-SM	IP-S-S-LR-LR-SM	SM	LR	LR	LR	SM	SM	LR	SM	SM	(3,4)	4						5.1(2.0)--mm(<>,outward)
5tbw.cif1	403	1.A.1259.|1.G.1229.-1.C.1280.	1.A.1260.|1.G.1230.-1.C.1279.	AnsA_LnsL_RnR	IC-S-S-LC-LC-SM	IC-S-S-LC-LC-SM	SM	LC	LC	LC	SM	SM	LC	SM	SM	(2,2)	3	7.1(5.1)--pm(>>,forward)				4.7(3.3)--pm(>>,forward)
5tbw.cif1	402	1.A.1302.|1.G.2831.-1.C.2857.	1.A.1302.|1.C.2832.-1.G.2856.	AeA_LnsL_RnsR	IP-S-S-LR-LR-SM	IP-S-S-LR-LR-SM	SM	LR	LR	LR	SM	SM	LR	SM	SM	(3,4)	4					6.9(3.7)--pm(>>,forward)				6.2(3.1)--pm(<<,backward)
5tbw.cif1	404	1.A.1303.|1.C.2885.-1.G.2937.	1.A.1304.|1.C.2884.-1.G.2938.	AnsA_LnL_RnsR	IP-S-S-LR-LR-SM	IP-S-S-LR-LR-SM	SM	LR	LR	LR	SM	SM	LR	SM	SM	(2,2)	3	4.4(2.4)--pm(>>,forward)								3.3(1.4)--pm(>>,forward)
5tbw.cif1	405	1.A.1406.|1.C.945.-1.G.1374.	1.A.1407.|1.C.944.-1.G.1375.	AnsA_LnL_RnsR	HC-S-S-LR-LR-SM	HC-S-S-LR-LR-SM	SM	LR	LR	LR	SM	SM	LR	SM	SM	(2,2)	3	5.3(3.0)--pm(>>,forward)								4.1(2.4)--pm(>>,forward)
5tbw.cif1	406	1.A.1534.|1.C.824.-1.G.901.	1.A.1535.|1.C.823.-1.G.902.	AnsA_LnL_RnsR	IC-S-S-LR-LR-SM	IC-S-S-LR-LR-SM	SM	LR	LR	LR	SM	SM	LR	SM	SM	(2,2)	3	5.3(3.0)--pm(>>,forward)								3.8(2.3)--pm(>>,forward)
5tbw.cif1	407	1.A.1593.|1.C.1615.-1.G.1829.	1.A.1594.|1.G.1525.-1.C.1614.	AnsA_LnR_RsL	JP-S-S-LC-LC-SM	JP-S-S-LC-LC-SM	SM	LC	LC	LC	LR	LR	LC	LR	LR	(2,2)	5	5.8(4.0)--pm(>>,forward)							4.2(1.3)--mp(>>,forward)
5tbw.cif1	408	1.A.1602.|1.C.1497.-1.G.1519.	1.A.1603.|1.C.1496.-1.G.1520.	AnsA_LnL_RnsR	HC-S-S-LR-LR-SM	HC-S-S-LR-LR-SM	SM	LR	LR	LR	SM	SM	LR	SM	SM	(2,2)	3	6.7(5.2)--pm(>>,forward)								3.9(2.5)--pm(>>,forward)
5tbw.cif1	409	1.A.1637.|1.C.1709.-1.G.1735.	1.A.1638.|1.C.1708.-1.G.1736.	AnsA_LnL_RnsR	HC-S-S-LR-LR-SM	HC-S-S-LR-LR-SM	SM	LR	LR	LR	SM	SM	LR	SM	SM	(2,2)	3	6.3(3.7)--pm(>>,forward)								3.3(1.5)--pm(>>,forward)
5tbw.cif1	410	1.A.1696.|1.C.1596.-1.G.1611.	1.A.1697.|1.U.1595.-1.A.1612.	AnsA_LnL_RnsR	JCJP-S-S-LR-LR-SM	JCJP-S-S-LR-LR-SM	SM	LR	LR	LR	SM	SM	LR	SM	SM	(2,2)	3	1.3(1.0)--pm(>>,forward)								5.6(3.9)--pm(>>,forward)
5tbw.cif1	411	1.A.1798.|1.C.1532.-1.G.1590.	1.A.1799.|1.C.1532.-1.G.1590.	AnsA_LeL_ReR	ICJP-S-S-LR-LR-SM	ICJP-S-S-LR-LR-SM	SM	LR	LR	LR	SM	SM	LR	SM	SM	(3,2)	3	4.9(3.4)--pm(>>,forward)
5tbw.cif1	411	1.A.1798.|1.C.1532.-1.G.1590.	1.A.1800.|1.C.1531.-1.G.1591.	LnL_RnsR	ICJP-S-S-LR-LR-SM	ICJP-S-S-LR-LR-SM	SM	LR	LR	LR	SM	SM	LR	SM	SM	(3,2)	3									2.8(1.3)--pm(>>,forward)
5tbw.cif1	411	1.A.1799.|1.C.1532.-1.G.1590.	1.A.1800.|1.C.1531.-1.G.1591.	AnsA_LnL_RnsR	ICJP-S-S-LR-LR-SM	ICJP-S-S-LR-LR-SM	SM	LR	LR	LR	SM	SM	LR	SM	SM	(3,2)	3	2.1(1.8)--pm(>>,forward)								2.8(1.3)--pm(>>,forward)
5tbw.cif1	412	1.A.2117.|1.U.1862.-1.G.1868.	1.A.2117.|1.U.3064.-1.A.3077.	AeA	JC-S-S-LR-LR-SM	JC-S-S-LR-LR-SM	SM	LR	LR	LR	LR	LR	LR	LR	LR	(1,2)	5
5tbw.cif1	413	1.A.2143.|1.G.2957.-1.U.2975.	1.A.2281.|1.A.2958.-1.U.2974.	LnsL_RnR	HC-S-S-LR-LR-SM	JC-S-S-LR-LR-SM	LR	LR	LR	LR	SM	SM	LR	SM	SM	(2,2)	4					4.5(1.6)--pm(>>,forward)
5tbw.cif1	414	1.A.2166.|1.G.1544.-1.U.1549.	1.A.2167.|1.G.1543.-1.C.1550.	AnsA_LnsL_LsR_RnR	HC-S-S-LR-LR-SM	HC-S-S-LR-LR-SM	SM	LR	LR	LR	SM	SM	LR	SM	SM	(3,2)	3	6.6(4.6)--pm(>>,forward)				2.3(0.8)--pm(<<,backward)	2.2(0.1)--mm(<>,outward)
5tbw.cif1	414	1.A.2166.|1.G.1544.-1.U.1549.	1.A.2168.|1.G.1543.-1.C.1550.	LnsL_LsR_RnR	HC-S-S-LR-LR-SM	HC-S-S-LR-LR-SM	SM	LR	LR	LR	SM	SM	LR	SM	SM	(3,2)	3					2.3(0.8)--pm(<<,backward)	2.2(0.1)--mm(<>,outward)
5tbw.cif1	414	1.A.2167.|1.G.1543.-1.C.1550.	1.A.2168.|1.G.1543.-1.C.1550.	AnsA_LeL_ReR	HC-S-S-LR-LR-SM	HC-S-S-LR-LR-SM	SM	LR	LR	LR	SM	SM	LR	SM	SM	(3,2)	3	6.8(5.3)--pm(>>,forward)
5tbw.cif1	415	1.A.2213.|1.U.2428.-1.A.2601.	1.A.2213.|1.G.2429.-1.C.2600.	AeA_LnL_RnR_RsL	IC-S-S-LR-LR-SM	IC-S-S-LR-LR-SM	SM	LR	LR	LR	SM	SM	LR	SM	SM	(4,3)	4								2.5(1.5)--mm(<>,outward)
5tbw.cif1	415	1.A.2213.|1.U.2428.-1.A.2601.	1.A.2214.|1.G.2429.-1.C.2600.	AnsA_LnL_RnR_RsL	IC-S-S-LR-LR-SM	IC-S-S-LR-LR-SM	SM	LR	LR	LR	SM	SM	LR	SM	SM	(4,3)	4	5.9(4.2)--pm(>>,forward)							2.5(1.5)--mm(<>,outward)
5tbw.cif1	415	1.A.2213.|1.U.2428.-1.A.2601.	1.A.2232.|1.U.2428.-1.A.2601.	AsA_LeL_ReR	IC-S-S-LR-LR-SM	IC-S-S-LR-LR-SM	SM	LR	LR	LR	SM	SM	LR	SM	SM	(4,3)	4	3.8(1.2)--mm(<>,outward)
5tbw.cif1	415	1.A.2213.|1.U.2428.-1.A.2601.	1.A.2233.|1.U.2427.-1.G.2602.	LnsL_RnsR	IC-S-S-LR-LR-SM	IC-S-S-LR-LR-SM	SM	LR	LR	LR	SM	SM	LR	SM	SM	(4,3)	4					1.3(0.1)--pm(<<,backward)				0.8(0.8)--pm(>>,forward)
5tbw.cif1	415	1.A.2213.|1.G.2429.-1.C.2600.	1.A.2214.|1.G.2429.-1.C.2600.	AnsA_LeL_ReR	IC-S-S-LR-LR-SM	IC-S-S-LR-LR-SM	SM	LR	LR	LR	SM	SM	LR	SM	SM	(4,3)	4	5.9(4.2)--pm(>>,forward)
5tbw.cif1	415	1.A.2213.|1.G.2429.-1.C.2600.	1.A.2232.|1.U.2428.-1.A.2601.	AsA_LnL_LsR_RnR	IC-S-S-LR-LR-SM	IC-S-S-LR-LR-SM	SM	LR	LR	LR	SM	SM	LR	SM	SM	(4,3)	4	3.8(1.2)--mm(<>,outward)					2.5(1.5)--mm(<>,outward)
5tbw.cif1	415	1.A.2214.|1.G.2429.-1.C.2600.	1.A.2232.|1.U.2428.-1.A.2601.	LnL_LsR_RnR	IC-S-S-LR-LR-SM	IC-S-S-LR-LR-SM	SM	LR	LR	LR	SM	SM	LR	SM	SM	(4,3)	4						2.5(1.5)--mm(<>,outward)
5tbw.cif1	393	1.A.2222.|1.A.307.-1.U.2782.	1.A.2223.|1.A.306.-1.U.2783.	AnsA_LnsL_RnR	HC-S-S-LR-LR-SM	HC-S-S-LR-LR-SM	SM	LR	LR	LR	SM	SM	LR	SM	SM	(4,3)	6	7.5(5.4)--pm(>>,forward)				1.1(1.0)--pm(<<,backward)
5tbw.cif1	393	1.A.2222.|1.A.307.-1.U.2782.	1.A.2223.|1.A.307.-1.U.2782.	AnsA_LeL_ReR	HC-S-S-LR-LR-SM	HC-S-S-LR-LR-SM	SM	LR	LR	LR	SM	SM	LR	SM	SM	(4,3)	6	7.5(5.4)--pm(>>,forward)
5tbw.cif1	393	1.A.2222.|1.A.307.-1.U.2782.	1.A.2224.|1.A.306.-1.U.2783.	LnsL_RnR	HC-S-S-LR-LR-SM	HC-S-S-LR-LR-SM	SM	LR	LR	LR	SM	SM	LR	SM	SM	(4,3)	6					1.1(1.0)--pm(<<,backward)
5tbw.cif1	393	1.A.2223.|1.A.306.-1.U.2783.	1.A.2223.|1.A.307.-1.U.2782.	AeA_LnsL_RnR	HC-S-S-LR-LR-SM	HC-S-S-LR-LR-SM	SM	LR	LR	LR	SM	SM	LR	SM	SM	(4,3)	6					1.1(1.0)--pm(>>,forward)
5tbw.cif1	393	1.A.2223.|1.A.306.-1.U.2783.	1.A.2224.|1.A.306.-1.U.2783.	AnsA_LeL_ReR	HC-S-S-LR-LR-SM	HC-S-S-LR-LR-SM	SM	LR	LR	LR	SM	SM	LR	SM	SM	(4,3)	6	7.0(5.2)--pm(>>,forward)
5tbw.cif1	393	1.A.2223.|1.A.307.-1.U.2782.	1.A.2224.|1.A.306.-1.U.2783.	AnsA_LnsL_RnR	HC-S-S-LR-LR-SM	HC-S-S-LR-LR-SM	SM	LR	LR	LR	SM	SM	LR	SM	SM	(4,3)	6	7.0(5.2)--pm(>>,forward)				1.1(1.0)--pm(<<,backward)
5tbw.cif1	415	1.A.2232.|1.U.2428.-1.A.2601.	1.A.2233.|1.U.2427.-1.G.2602.	AnsA_LnsL_RnsR	IC-S-S-LR-LR-SM	IC-S-S-LR-LR-SM	SM	LR	LR	LR	SM	SM	LR	SM	SM	(4,3)	4	6.4(4.5)--pm(>>,forward)				1.3(0.1)--pm(<<,backward)				0.8(0.8)--pm(>>,forward)
5tbw.cif1	416	1.A.2243.|1.C.2151.-1.G.2185.	1.A.2313.|1.G.2150.-1.U.2186.	AsA_LnsL_RnsR	BC-S-S-LR-LR-SM	JC-S-S-LR-LR-SM	LR	LR	LR	LR	SM	SM	LR	SM	SM	(3,3)	6	2.5(2.1)--mp(<<,backward)				6.9(3.4)--pm(<<,backward)				7.2(4.5)--pm(>>,forward)
5tbw.cif1	417	1.A.2270.|1.C.2196.-1.G.2246.	1.A.2271.|1.C.2195.-1.G.2247.	AnsA_LnL_RnsR	JC-S-S-LC-LC-SM	JC-S-S-LC-LC-SM	SM	LC	LC	LC	SM	SM	LC	SM	SM	(2,2)	3	6.5(4.8)--pm(>>,forward)								2.6(1.0)--pm(>>,forward)
5tbw.cif1	418	1.A.2295.|1.G.2917.-1.C.2929.	1.A.2296.|1.G.2918.-1.C.2928.	AnsA_LnsL_RnR_RsL	HC-S-S-LR-LR-SM	HC-S-S-LR-LR-SM	SM	LR	LR	LR	SM	SM	LR	SM	SM	(2,2)	3	7.8(5.7)--pm(>>,forward)				3.3(1.3)--pm(>>,forward)			1.7(0.1)--mm(<>,outward)
5tbw.cif1	416	1.A.2312.|1.C.2192.-1.G.2315.	1.A.2313.|1.G.2150.-1.U.2186.	AnA_RsA	JC-S-S-LC-LC-SM	JC-S-S-LR-LR-SM	SM	LR	LR	LC	LR	LR	LC	LR	LR	(3,3)	6							1.8(0.6)--mm(<>,outward)
5tbw.cif1	419	1.A.2696.|1.C.2630.-1.G.2648.	1.A.2758.|1.U.2629.-1.A.2649.	AsA_LnL_RnsR	HP-S-S-LR-LR-SM	JIJP-S-S-LC-LC-SM	LR	LR	LR	LC	SM	SM	LC	SM	SM	(2,2)	4	3.0(1.2)--mm(<>,outward)								3.8(2.2)--pm(>>,forward)
5tbw.cif1	420	1.A.2933.|1.A.2890.-1.C.2913.	1.A.2934.|1.C.2889.-1.G.2914.	AnsA_LnsL_LsR_RnR	JC-JC-JC-SM-SM-SM	JC-JC-JC-SM-SM-SM	SM	SM	SM	SM	SM	SM	SM	SM	SM	(2,2)	3	7.5(5.6)--pm(>>,forward)				0.8(0.3)--pm(<<,backward)	1.6(0.8)--mm(<>,outward)
5tbw.cif1	421	1.A.3106.|1.C.2893.-1.G.2908.	1.A.3129.|1.A.2892.-1.U.2909.	LnsL_RnsR	IC-S-S-LR-LR-SM	IC-S-S-LR-LR-SM	SM	LR	LR	LR	SM	SM	LR	SM	SM	(2,2)	4					5.0(3.5)--pm(<<,backward)				5.3(2.6)--pm(>>,forward)
5tbw.cif1	422	1.A.3273.|1.A.498.-1.U.615.	1.A.3274.|1.C.497.-1.G.616.	AnsA_LnL_LsR_RnR	JC-S-S-LR-LR-SM	JC-S-S-LR-LR-SM	SM	LR	LR	LR	SM	SM	LR	SM	SM	(2,2)	3	5.4(3.9)--pm(>>,forward)					2.9(1.7)--mm(<>,outward)
5tbw.cif1	423	4.A.59.|4.C.45.-4.G.58.	4.A.61.|4.G.46.-4.C.57.	AsA_LnL_RnR_RsL	HP-S-S-LC-LC-SM	HP-S-S-LC-LC-SM	SM	LC	LC	LC	SM	SM	LC	SM	SM	(2,2)	3	1.3(0.7)--pm(>>,forward)							3.6(1.0)--mm(<>,outward)
5tbw.cif1	424	AS.A.51.|AS.C.29.-AS.G.49.	AS.A.55.|AS.C.28.-AS.G.52.	AnsR_LnsL	IC-IC-IC-SM-SM-SM	IC-S-S-LC-LC-SM	LR	LC	LC	LR	LC	LC	LR	LC	LC	(3,3)	5			2.2(1.4)--pm(>>,forward)		4.2(0.7)--pm(<<,backward)
5tbw.cif1	424	AS.A.55.|AS.C.28.-AS.G.52.	AS.A.56.|AS.A.27.-AS.U.53.	AnsA_LnsL_RnsR	IC-S-S-LC-LC-SM	IC-S-S-LC-LC-SM	SM	LC	LC	LC	SM	SM	LC	SM	SM	(3,3)	5	4.6(3.3)--pm(>>,forward)				4.9(3.4)--pm(<<,backward)				3.1(1.1)--pm(>>,forward)
5tbw.cif1	425	A.A.1655.|1.A.2291.-1.U.2301.	A.A.1746.|1.C.2290.-1.G.2302.	AsA_LnsL_LsR_RnR	IC-S-S-LR-LR-SM	IC-S-S-LR-LR-SM	SM	LR	LR	LR	SM	SM	LR	SM	SM	(2,2)	4	3.9(2.2)--mm(<>,outward)				0.4(0.1)--pm(<<,backward)	2.6(1.6)--mm(<>,outward)
5u3g.cif1	426	B.A.71.|B.G.10.-B.C.29.	B.A.72.|B.G.10.-B.C.29.	AnsA_LeL_ReR	HC-S-S-LR-LR-SM	HC-S-S-LR-LR-SM	SM	LR	LR	LR	SM	SM	LR	SM	SM	(4,2)	3	5.7(4.1)--pm(>>,forward)
5u3g.cif1	426	B.A.71.|B.G.10.-B.C.29.	B.A.73.|B.G.9.-B.C.30.	LnsL_RnR	HC-S-S-LR-LR-SM	HC-S-S-LR-LR-SM	SM	LR	LR	LR	SM	SM	LR	SM	SM	(4,2)	3					3.8(2.0)--pm(<<,backward)
5u3g.cif1	426	B.A.71.|B.G.10.-B.C.29.	B.A.73.|B.G.10.-B.C.29.	LeL_ReR	HC-S-S-LR-LR-SM	HC-S-S-LR-LR-SM	SM	LR	LR	LR	SM	SM	LR	SM	SM	(4,2)	3
5u3g.cif1	426	B.A.71.|B.G.10.-B.C.29.	B.A.74.|B.G.9.-B.C.30.	LnsL_RnR	HC-S-S-LR-LR-SM	HC-S-S-LR-LR-SM	SM	LR	LR	LR	SM	SM	LR	SM	SM	(4,2)	3					3.8(2.0)--pm(<<,backward)
5u3g.cif1	426	B.A.72.|B.G.10.-B.C.29.	B.A.73.|B.G.9.-B.C.30.	AnsA_LnsL_RnR	HC-S-S-LR-LR-SM	HC-S-S-LR-LR-SM	SM	LR	LR	LR	SM	SM	LR	SM	SM	(4,2)	3	4.9(3.3)--pm(>>,forward)				3.8(2.0)--pm(<<,backward)
5u3g.cif1	426	B.A.72.|B.G.10.-B.C.29.	B.A.73.|B.G.10.-B.C.29.	AnsA_LeL_ReR	HC-S-S-LR-LR-SM	HC-S-S-LR-LR-SM	SM	LR	LR	LR	SM	SM	LR	SM	SM	(4,2)	3	4.9(3.3)--pm(>>,forward)
5u3g.cif1	426	B.A.72.|B.G.10.-B.C.29.	B.A.74.|B.G.9.-B.C.30.	LnsL_RnR	HC-S-S-LR-LR-SM	HC-S-S-LR-LR-SM	SM	LR	LR	LR	SM	SM	LR	SM	SM	(4,2)	3					3.8(2.0)--pm(<<,backward)
5u3g.cif1	426	B.A.73.|B.G.9.-B.C.30.	B.A.73.|B.G.10.-B.C.29.	AeA_LnsL_RnR	HC-S-S-LR-LR-SM	HC-S-S-LR-LR-SM	SM	LR	LR	LR	SM	SM	LR	SM	SM	(4,2)	3					3.8(2.0)--pm(>>,forward)
5u3g.cif1	426	B.A.73.|B.G.9.-B.C.30.	B.A.74.|B.G.9.-B.C.30.	AnsA_LeL_ReR	HC-S-S-LR-LR-SM	HC-S-S-LR-LR-SM	SM	LR	LR	LR	SM	SM	LR	SM	SM	(4,2)	3	3.4(2.5)--pm(>>,forward)
5u3g.cif1	426	B.A.73.|B.G.10.-B.C.29.	B.A.74.|B.G.9.-B.C.30.	AnsA_LnsL_RnR	HC-S-S-LR-LR-SM	HC-S-S-LR-LR-SM	SM	LR	LR	LR	SM	SM	LR	SM	SM	(4,2)	3	3.4(2.5)--pm(>>,forward)				3.8(2.0)--pm(<<,backward)
5x2g.cif1	427	B.A.86.|B.A.53.-B.U.65.	B.A.87.|B.G.54.-B.C.64.	AnsA_LnsL_RnsR	IP-S-S-LC-LC-SM	IP-S-S-LC-LC-SM	SM	LC	LC	LC	SM	SM	LC	SM	SM	(3,2)	3	5.7(4.2)--pm(>>,forward)				1.7(1.7)--pm(>>,forward)				1.6(0.5)--pm(<<,backward)
5x2g.cif1	427	B.A.86.|B.A.53.-B.U.65.	B.A.88.|B.G.54.-B.C.64.	LnsL_RnsR	IP-S-S-LC-LC-SM	IP-S-S-LC-LC-SM	SM	LC	LC	LC	SM	SM	LC	SM	SM	(3,2)	3					1.7(1.7)--pm(>>,forward)				1.6(0.5)--pm(<<,backward)
5x2g.cif1	427	B.A.87.|B.G.54.-B.C.64.	B.A.88.|B.G.54.-B.C.64.	AnA_LeL_ReR	IP-S-S-LC-LC-SM	IP-S-S-LC-LC-SM	SM	LC	LC	LC	SM	SM	LC	SM	SM	(3,2)	3
5xtm.cif1	428	B.A.27.|D.G.6.-D.C.41.	B.A.28.|D.G.6.-D.C.41.	AnsA_LeL_ReR	HC-S-S-LR-LR-SM	HC-S-S-LR-LR-SM	SM	LR	LR	LR	SM	SM	LR	SM	SM	(2,1)	3	6.6(4.6)--pm(>>,forward)
5xtm.cif1	429	D.A.27.|B.G.6.-B.C.41.	D.A.28.|B.G.6.-B.C.41.	AnsA_LeL_ReR	HC-S-S-LR-LR-SM	HC-S-S-LR-LR-SM	SM	LR	LR	LR	SM	SM	LR	SM	SM	(2,1)	3	6.6(4.7)--pm(>>,forward)
6az1.cif1	430	1.A.47.|1.U.96.-1.A.428.	1.A2M.98.|1.U.96.-1.A.428.	AsA_LeL_ReR	JC-S-S-LR-LR-SM	JC-S-S-LC-LC-SM	LR	LR	LR	LC	SM	SM	LC	SM	SM	(3,2)	5	4.3(1.6)--pm(>>,forward)
6az1.cif1	430	1.A.47.|1.U.96.-1.A.428.	1.A.468.|1.C.95.-1.G.429.	AsA_LnsL_RnsR	JC-S-S-LR-LR-SM	JCJP-S-S-LC-LC-SM	LR	LR	LR	LC	SM	SM	LC	SM	SM	(3,2)	5	6.6(5.4)--mm(<>,outward)				3.9(1.4)--pm(<<,backward)				3.3(2.8)--pm(>>,forward)
6az1.cif1	430	1.A2M.98.|1.U.96.-1.A.428.	1.A.468.|1.C.95.-1.G.429.	LnsL_RnsR	JC-S-S-LC-LC-SM	JCJP-S-S-LC-LC-SM	LR	LC	LC	LC	SM	SM	LC	SM	SM	(3,2)	5					3.9(1.4)--pm(<<,backward)				3.3(2.8)--pm(>>,forward)
6az1.cif1	431	1.A.152.|1.A.64.-1.U.84.	1.A.173.|1.G.63.-1.C.85.	AsA_LnsL_RnR	JC-S-S-LR-LR-SM	JC-S-S-LR-LR-SM	SM	LR	LR	LR	SM	SM	LR	SM	SM	(3,2)	4	2.6(0.3)--mm(<>,outward)				3.2(1.7)--pm(<<,backward)
6az1.cif1	431	1.A.152.|1.A.64.-1.U.84.	1.A.173.|1.A.64.-1.U.84.	AsA_LeL_ReR	JC-S-S-LR-LR-SM	JC-S-S-LR-LR-SM	SM	LR	LR	LR	SM	SM	LR	SM	SM	(3,2)	4	2.6(0.3)--mm(<>,outward)
6az1.cif1	431	1.A.152.|1.A.64.-1.U.84.	1.A.174.|1.G.63.-1.C.85.	LnsL_RnR	JC-S-S-LR-LR-SM	JC-S-S-LR-LR-SM	SM	LR	LR	LR	SM	SM	LR	SM	SM	(3,2)	4					3.2(1.7)--pm(<<,backward)
6az1.cif1	432	1.A.161.|1.C.457.-1.G.462.	1.A.162.|1.C.457.-1.G.462.	AnsA_LeL_ReR	HC-S-S-LR-LR-SM	HC-S-S-LR-LR-SM	SM	LR	LR	LR	SM	SM	LR	SM	SM	(2,1)	3	4.0(1.7)--pm(>>,forward)
6az1.cif1	431	1.A.173.|1.G.63.-1.C.85.	1.A.173.|1.A.64.-1.U.84.	AeA_LnsL_RnR	JC-S-S-LR-LR-SM	JC-S-S-LR-LR-SM	SM	LR	LR	LR	SM	SM	LR	SM	SM	(3,2)	4					3.2(1.7)--pm(>>,forward)
6az1.cif1	431	1.A.173.|1.G.63.-1.C.85.	1.A.174.|1.G.63.-1.C.85.	AnsA_LeL_ReR	JC-S-S-LR-LR-SM	JC-S-S-LR-LR-SM	SM	LR	LR	LR	SM	SM	LR	SM	SM	(3,2)	4	4.2(2.8)--pm(>>,forward)
6az1.cif1	431	1.A.173.|1.A.64.-1.U.84.	1.A.174.|1.G.63.-1.C.85.	AnsA_LnsL_RnR	JC-S-S-LR-LR-SM	JC-S-S-LR-LR-SM	SM	LR	LR	LR	SM	SM	LR	SM	SM	(3,2)	4	4.2(2.8)--pm(>>,forward)				3.2(1.7)--pm(<<,backward)
6az1.cif1	433	1.A.488.|1.C.485.-1.G.510.	1.A.488.|1.C.486.-1.OMG.509.	AeA_LnL_RnsR	IC-S-S-LC-LC-SM	IC-S-S-LC-LC-SM	SM	LC	LC	LC	SM	SM	LC	SM	SM	(4,3)	4									3.8(2.5)--pm(<<,backward)
6az1.cif1	433	1.A.488.|1.C.485.-1.G.510.	1.A.489.|1.C.486.-1.OMG.509.	AnsA_LnL_RnsR	IC-S-S-LC-LC-SM	IC-S-S-LC-LC-SM	SM	LC	LC	LC	SM	SM	LC	SM	SM	(4,3)	4	1.4(1.4)--pm(>>,forward)								3.8(2.5)--pm(<<,backward)
6az1.cif1	433	1.A.488.|1.C.485.-1.G.510.	1.A.570.|1.C.485.-1.G.510.	LeL_ReR	IC-S-S-LC-LC-SM	HC-S-S-LR-LR-SM	LR	LC	LC	LR	SM	SM	LR	SM	SM	(4,3)	4
6az1.cif1	433	1.A.488.|1.C.485.-1.G.510.	1.A.571.|1.G.484.-1.C.511.	LnsL_RnsR	IC-S-S-LC-LC-SM	HC-S-S-LR-LR-SM	LR	LC	LC	LR	SM	SM	LR	SM	SM	(4,3)	4					3.2(0.9)--pm(<<,backward)				7.3(4.3)--pm(>>,forward)
6az1.cif1	433	1.A.488.|1.C.486.-1.OMG.509.	1.A.489.|1.C.486.-1.OMG.509.	AnsA_LeL_ReR	IC-S-S-LC-LC-SM	IC-S-S-LC-LC-SM	SM	LC	LC	LC	SM	SM	LC	SM	SM	(4,3)	4	1.4(1.4)--pm(>>,forward)
6az1.cif1	433	1.A.488.|1.C.486.-1.OMG.509.	1.A.570.|1.C.485.-1.G.510.	LnL_RnsR	IC-S-S-LC-LC-SM	HC-S-S-LR-LR-SM	LR	LC	LC	LR	SM	SM	LR	SM	SM	(4,3)	4									3.8(2.5)--pm(>>,forward)
6az1.cif1	433	1.A.489.|1.C.486.-1.OMG.509.	1.A.570.|1.C.485.-1.G.510.	LnL_RnsR	IC-S-S-LC-LC-SM	HC-S-S-LR-LR-SM	LR	LC	LC	LR	SM	SM	LR	SM	SM	(4,3)	4									3.8(2.5)--pm(>>,forward)
6az1.cif1	433	1.A.570.|1.C.485.-1.G.510.	1.A.571.|1.G.484.-1.C.511.	AnsA_LnsL_RnsR	HC-S-S-LR-LR-SM	HC-S-S-LR-LR-SM	SM	LR	LR	LR	SM	SM	LR	SM	SM	(4,3)	4	5.3(3.9)--pm(>>,forward)				3.2(0.9)--pm(<<,backward)				7.3(4.3)--pm(>>,forward)
6az1.cif1	434	1.A.604.|1.G.597.-1.C.639.	1.A.605.|1.G.598.-1.C.638.	AnsA_LnsL_RnR	HP-S-S-LR-LR-SM	HP-S-S-LR-LR-SM	SM	LR	LR	LR	SM	SM	LR	SM	SM	(2,2)	3	6.0(3.7)--pm(>>,forward)				3.4(1.6)--pm(>>,forward)
6az1.cif1	435	1.A2M.668.|1.C.14.-1.G.1492.	1.A.1436.|1.U.13.-1.A.1493.	LnL_RnsR	JP-S-S-LR-LR-SM	HPJP-S-S-LR-LR-SM	SM	LR	LR	LR	SM	SM	LR	SM	SM	(2,2)	4									3.3(1.8)--pm(>>,forward)
6az1.cif1	436	1.A.669.|1.C.663.-1.G.1459.	1.A.670.|1.U.664.-1.A.1458.	AnsA_LnsL_RnsR	JP-S-S-LC-LC-SM	JP-S-S-LC-LC-SM	SM	LC	LC	LC	SM	SM	LC	SM	SM	(2,2)	3	5.9(3.8)--pm(>>,forward)				1.3(0.5)--pm(>>,forward)				0.9(0.9)--pm(<<,backward)
6az1.cif1	437	1.A.870.|1.U.36.-1.G.520.	1.A.871.|1.U.37.-1.A.519.	AnsA_LnL_RnsR	HC-S-S-LR-LR-SM	HC-S-S-LR-LR-SM	SM	LR	LR	LR	SM	SM	LR	SM	SM	(2,2)	3	2.0(1.8)--pm(>>,forward)								0.8(0.8)--pm(<<,backward)
6az1.cif1	438	1.A.895.|1.A.106.-1.U.350.	1.A.896.|1.G.107.-1.C.349.	AnsA_LnsL_RnsR	IC-S-S-LR-LR-SM	IC-S-S-LR-LR-SM	SM	LR	LR	LR	SM	SM	LR	SM	SM	(3,2)	3	6.5(4.6)--pm(>>,forward)				4.5(3.3)--pm(>>,forward)				2.8(0.8)--pm(<<,backward)
6az1.cif1	438	1.A.895.|1.A.106.-1.U.350.	1.A.897.|1.G.107.-1.C.349.	LnsL_RnsR	IC-S-S-LR-LR-SM	IC-S-S-LR-LR-SM	SM	LR	LR	LR	SM	SM	LR	SM	SM	(3,2)	3					4.5(3.3)--pm(>>,forward)				2.8(0.8)--pm(<<,backward)
6az1.cif1	438	1.A.896.|1.G.107.-1.C.349.	1.A.897.|1.G.107.-1.C.349.	AnsA_LeL_ReR	IC-S-S-LR-LR-SM	IC-S-S-LR-LR-SM	SM	LR	LR	LR	SM	SM	LR	SM	SM	(3,2)	3	6.1(4.3)--pm(>>,forward)
6az1.cif1	439	1.A.1153.|1.G.1244.-1.C.1254.	1.A.1154.|1.U.1243.-1.A.1255.	AnsA_LnL_LsR_RnR	HC-S-S-LR-LR-SM	HC-S-S-LR-LR-SM	SM	LR	LR	LR	SM	SM	LR	SM	SM	(2,2)	3	6.4(4.6)--pm(>>,forward)					5.6(3.1)--mm(<>,outward)
6az1.cif1	440	1.A.1186.|1.U.674.-1.A.1221.	1.A.1187.|1.G.673.-1.C.1222.	AnsA_LnsL_RnsR	HC-S-S-LR-LR-SM	HC-S-S-LR-LR-SM	SM	LR	LR	LR	SM	SM	LR	SM	SM	(2,2)	3	5.6(4.0)--pm(>>,forward)				5.4(2.6)--pm(<<,backward)				4.0(2.8)--pm(>>,forward)
6az1.cif1	441	1.A.1224.|1.U.2176.-1.A.2191.	1.A.1224.|1.G.2177.-1.C.2190.	AeA_LnL_RnR_RsL	JP-S-S-LR-LR-SM	JP-S-S-LR-LR-SM	SM	LR	LR	LR	SM	SM	LR	SM	SM	(2,2)	3								1.5(0.2)--mm(<>,outward)
6az1.cif1	441	1.A.1224.|1.U.2176.-1.A.2191.	1.A.1225.|1.G.2177.-1.C.2190.	AnsA_LnL_RnR_RsL	JP-S-S-LR-LR-SM	JP-S-S-LR-LR-SM	SM	LR	LR	LR	SM	SM	LR	SM	SM	(2,2)	3	6.2(4.0)--pm(>>,forward)							1.5(0.2)--mm(<>,outward)
6az1.cif1	441	1.A.1224.|1.G.2177.-1.C.2190.	1.A.1225.|1.G.2177.-1.C.2190.	AnsA_LeL_ReR	JP-S-S-LR-LR-SM	JP-S-S-LR-LR-SM	SM	LR	LR	LR	SM	SM	LR	SM	SM	(2,2)	3	6.2(4.0)--pm(>>,forward)
6az1.cif1	442	1.A.1535.|1.C.1562.-1.G.1854.	1.A.1536.|1.C.1561.-1.G.1855.	AnsA_LnL_RnsR	IC-S-S-LC-LC-SM	IC-S-S-LC-LC-SM	SM	LC	LC	LC	SM	SM	LC	SM	SM	(2,2)	3	7.2(5.4)--pm(>>,forward)								3.9(2.3)--pm(>>,forward)
6az1.cif1	443	1.A.1884.|1.G.2010.-1.U.2026.	1.A.1885.|1.G.2010.-1.U.2026.	AnsA_LeL_ReR	JC-IC-IC-LR-LR-SM	JC-IC-IC-LR-LR-SM	SM	LR	LR	LR	SM	SM	LR	SM	SM	(4,2)	6	6.4(4.6)--pm(>>,forward)
6az1.cif1	443	1.A.1884.|1.G.2010.-1.U.2026.	1.A.1941.|1.C.2009.-1.G.2027.	AsA_LnsL_RnsR	JC-IC-IC-LR-LR-SM	JC-S-S-LR-LR-SM	SM	LR	LR	LR	LC	LC	LR	LC	LC	(4,2)	6	6.1(5.0)--mm(<>,outward)				2.3(0.8)--pm(<<,backward)				1.6(0.3)--pm(>>,forward)
6az1.cif1	443	1.A.1884.|1.G.2010.-1.U.2026.	1.A.1942.|1.C.2009.-1.G.2027.	LnsL_RnsR	JC-IC-IC-LR-LR-SM	JC-S-S-LR-LR-SM	SM	LR	LR	LR	LC	LC	LR	LC	LC	(4,2)	6					2.3(0.8)--pm(<<,backward)				1.6(0.3)--pm(>>,forward)
6az1.cif1	443	1.A.1885.|1.G.2010.-1.U.2026.	1.A.1941.|1.C.2009.-1.G.2027.	LnsL_RnsR	JC-IC-IC-LR-LR-SM	JC-S-S-LR-LR-SM	SM	LR	LR	LR	LC	LC	LR	LC	LC	(4,2)	6					2.3(0.8)--pm(<<,backward)				1.6(0.3)--pm(>>,forward)
6az1.cif1	443	1.A.1885.|1.G.2010.-1.U.2026.	1.A.1942.|1.C.2009.-1.G.2027.	LnsL_RnsR	JC-IC-IC-LR-LR-SM	JC-S-S-LR-LR-SM	SM	LR	LR	LR	LC	LC	LR	LC	LC	(4,2)	6					2.3(0.8)--pm(<<,backward)				1.6(0.3)--pm(>>,forward)
6az1.cif1	443	1.A.1941.|1.C.2009.-1.G.2027.	1.A.1942.|1.C.2009.-1.G.2027.	AnsA_LeL_ReR	JC-S-S-LR-LR-SM	JC-S-S-LR-LR-SM	SM	LR	LR	LR	SM	SM	LR	SM	SM	(4,2)	6	6.6(4.8)--pm(>>,forward)
6az1.cif1	444	1.A.2090.|1.C.2089.-1.G.2133.	1.A.2134.|1.C.2089.-1.G.2133.	AnL_AsA_LeL_ReR_RnA	IC-IC-IC-SM-SM-SM	IC-IC-IC-SM-SM-SM	SM	SM	SM	SM	SM	SM	SM	SM	SM	(2,1)	2	6.7(4.2)--mm(<>,outward)
6az1.cif1	445	1.A.2158.|2.A.35.-5.U.9.	1.A.2159.|2.A.36.-5.U.8.	AnsA_LnsL_RnR	IC-S-S-LR-LR-SM	IC-S-S-LR-LR-SM	SM	LR	LR	LR	SM	SM	LR	SM	SM	(2,2)	3	2.6(0.5)--pm(>>,forward)				4.1(1.9)--pm(>>,forward)
6az3.cif1	446	1.A.58.|1.C.25.-1.G.56.	1.A.365.|1.C.25.-1.G.56.	AsA_LeL_ReR	JI-JI-JI-SM-SM-SM	JP-JI-JI-LR-LR-SM	LR	SM	SM	LR	SM	SM	LR	SM	SM	(2,1)	3	6.1(4.0)--mm(<>,outward)
6az3.cif1	447	1.A.68.|1.A.340.-1.U.351.	1.A2M.69.|1.G.341.-1.C.350.	AnsA_LnsL_RnR	HC-S-S-LR-LR-SM	HC-S-S-LR-LR-SM	SM	LR	LR	LR	SM	SM	LR	SM	SM	(2,2)	3	4.9(3.5)--pm(>>,forward)				4.4(3.2)--pm(>>,forward)
6az3.cif1	448	1.A.132.|1.G.172.-1.C.285.	1.A.134.|1.U.171.-1.U.286.	AsA_LnsL_RnsR	HC-S-S-LR-LR-SM	HC-IC-ICJP-LR-LR-SM	SM	LR	LR	LR	LC	LC	LR	LC	LC	(2,2)	5	0.9(0.8)--pm(>>,forward)				1.7(0.4)--pm(<<,backward)				5.0(2.5)--pm(>>,forward)
6az3.cif1	449	1.A.188.|1.C.245.-1.G.249.	1.A.189.|1.C.244.-1.G.259.	AnsA_LnL_RsR	JI-HP-HP-LR-LR-SM	JI-S-S-LC-LC-SM	SM	LC	LC	LR	LC	LC	LR	LC	LC	(2,2)	4	6.8(4.5)--pm(>>,forward)								2.9(0.3)--pm(>>,forward)
6az3.cif1	450	1.A.692.|1.C.853.-1.G.992.	1.A.1527.|1.C.854.-1.G.991.	AsA_LnL_RnsR	JCJP-S-S-LC-LC-SM	JC-S-S-LC-LC-SM	SM	LC	LC	LC	SM	SM	LC	SM	SM	(3,3)	7	2.0(0.7)--mm(<>,outward)								4.3(2.7)--pm(<<,backward)
6az3.cif1	451	1.A.1053.|1.A.1049.-1.U.1101.	1.A.1053.|1.G.1050.-1.C.1100.	AeA_LnsL_RnsR	IC-S-S-LC-LC-SM	IC-S-S-LC-LC-SM	SM	LC	LC	LC	SM	SM	LC	SM	SM	(2,2)	3					3.9(3.5)--pm(>>,forward)				2.0(0.5)--pm(<<,backward)
6az3.cif1	451	1.A.1053.|1.A.1049.-1.U.1101.	1.A.1054.|1.G.1050.-1.C.1100.	AnA_LnsL_RnsR	IC-S-S-LC-LC-SM	IC-S-S-LC-LC-SM	SM	LC	LC	LC	SM	SM	LC	SM	SM	(2,2)	3					3.9(3.5)--pm(>>,forward)				2.0(0.5)--pm(<<,backward)
6az3.cif1	451	1.A.1053.|1.G.1050.-1.C.1100.	1.A.1054.|1.G.1050.-1.C.1100.	AnA_LeL_ReR	IC-S-S-LC-LC-SM	IC-S-S-LC-LC-SM	SM	LC	LC	LC	SM	SM	LC	SM	SM	(2,2)	3
6az3.cif1	452	1.A.1098.|2.U.1061.-2.G.1073.	1.A.1099.|2.G.1060.-2.C.1074.	AnsA_LnsL_RnsR	IC-S-S-LR-LR-SM	IC-S-S-LR-LR-SM	SM	LR	LR	LR	SM	SM	LR	SM	SM	(2,2)	3	4.9(3.3)--pm(>>,forward)				6.9(3.2)--pm(<<,backward)				4.9(2.3)--pm(>>,forward)
6az3.cif1	453	1.A.1186.|2.U.1265.-2.G.1302.	1.A.1187.|2.C.1264.-2.A.1303.	AnsA_LnsL_RnsR	HC-JC-JC-LR-LR-SM	HC-JC-JC-LR-LR-SM	SM	LR	LR	LR	SM	SM	LR	SM	SM	(3,3)	4	5.2(3.7)--pm(>>,forward)				4.8(2.1)--pm(<<,backward)				5.8(3.7)--pm(>>,forward)
6az3.cif1	453	1.A.1187.|2.C.1264.-2.A.1303.	2.A.619.|2.G.1263.-2.U.1304.	LnsL_RnsR	HC-JC-JC-LR-LR-SM	HC-JC-JC-LR-LR-SM	LR	LR	LR	LR	SM	SM	LR	SM	SM	(3,3)	4					6.9(4.2)--pm(<<,backward)				5.9(3.3)--pm(>>,forward)
6az3.cif1	454	1.A.1210.|1.G.1174.-1.C.1198.	1.A.1211.|1.C.1175.-1.G.1197.	AnsA_LnsL_RnsR	HC-S-S-LR-LR-SM	HC-S-S-LR-LR-SM	SM	LR	LR	LR	SM	SM	LR	SM	SM	(2,2)	3	6.1(3.5)--pm(>>,forward)				7.0(4.3)--pm(>>,forward)				5.3(2.2)--pm(<<,backward)
6az3.cif1	455	1.A.1235.|1.G.1228.-1.C.1398.	1.A.1236.|1.G.1229.-1.C.1397.	AnsA_LnsL_RnR	IP-S-S-LR-LR-SM	IP-S-S-LR-LR-SM	SM	LR	LR	LR	SM	SM	LR	SM	SM	(2,2)	3	7.0(4.8)--pm(>>,forward)				4.5(2.0)--pm(>>,forward)
6az3.cif1	456	1.A.1265.|2.G.1272.-2.C.1294.	1.A.1266.|2.G.1273.-2.U.1293.	AnsA_LnsL_RnR	IP-S-S-LR-LR-SM	IP-S-S-LR-LR-SM	SM	LR	LR	LR	SM	SM	LR	SM	SM	(3,4)	4	2.7(2.2)--pm(>>,forward)				3.6(2.3)--pm(>>,forward)
6az3.cif1	456	1.A.1265.|2.G.1272.-2.C.1294.	1.A.1364.|2.C.1271.-2.G.1295.	LnL_LsR_RnR	IP-S-S-LR-LR-SM	IP-S-S-LR-LR-SM	SM	LR	LR	LR	SM	SM	LR	SM	SM	(3,4)	4						5.0(2.0)--mm(<>,outward)
6az3.cif1	456	1.A.1364.|2.G.1270.-2.C.1296.	1.A.1364.|2.C.1271.-2.G.1295.	AeA_LnsL_RnsR	IP-S-S-LR-LR-SM	IP-S-S-LR-LR-SM	SM	LR	LR	LR	SM	SM	LR	SM	SM	(3,4)	4					4.4(1.9)--pm(>>,forward)				6.3(3.3)--pm(<<,backward)
6az3.cif1	457	1.A.1365.|2.C.1324.-2.G.1376.	1.A.1366.|2.C.1323.-2.G.1377.	AnsA_LnL_RnsR	IP-S-S-LR-LR-SM	IP-S-S-LR-LR-SM	SM	LR	LR	LR	SM	SM	LR	SM	SM	(2,2)	3	4.4(3.5)--pm(>>,forward)								4.1(2.5)--pm(>>,forward)
6az3.cif1	450	1.A.1527.|1.C.854.-1.G.991.	2.A.648.|1.C.855.-1.U.990.	LnsL_RnR	JC-S-S-LC-LC-SM	JCJP-IC-IC-LR-LR-SM	LR	LR	LR	LR	LC	LC	LR	LC	LC	(3,3)	7					0.7(0.1)--pm(>>,forward)
6az3.cif1	458	2.A.389.|2.G.1396.-2.U.1414.	2.A2M.527.|2.A.1397.-2.U.1413.	LnsL_RnsR	HC-S-S-LR-LR-SM	JC-S-S-LR-LR-SM	LR	LR	LR	LR	SM	SM	LR	SM	SM	(2,2)	4					4.8(1.9)--pm(>>,forward)				1.7(0.4)--pm(<<,backward)
6az3.cif1	459	2.A.459.|2.U.674.-2.A.1029.	2.A.460.|2.G.675.-2.C.1028.	AnsA_LnL_RnsR_RsL	IC-S-S-LR-LR-SM	IC-S-S-LR-LR-SM	SM	LR	LR	LR	SM	SM	LR	SM	SM	(3,2)	4	6.5(4.6)--pm(>>,forward)							1.4(0.7)--mm(<>,outward)	0.4(0.1)--pm(<<,backward)
6az3.cif1	459	2.A.459.|2.U.674.-2.A.1029.	2.A.478.|2.U.674.-2.A.1029.	AsA_LeL_ReR	IC-S-S-LR-LR-SM	IC-S-S-LR-LR-SM	SM	LR	LR	LR	SM	SM	LR	SM	SM	(3,2)	4	3.6(1.0)--mm(<>,outward)
6az3.cif1	459	2.A.460.|2.G.675.-2.C.1028.	2.A.478.|2.U.674.-2.A.1029.	LnL_LsR_RnsR	IC-S-S-LR-LR-SM	IC-S-S-LR-LR-SM	SM	LR	LR	LR	SM	SM	LR	SM	SM	(3,2)	4						1.4(0.7)--mm(<>,outward)			0.4(0.1)--pm(>>,forward)
6az3.cif1	460	2.A.489.|2.G.397.-2.C.431.	2.A.559.|2.G.396.-2.U.432.	AsA_LnsL_RnsR	BC-S-S-LR-LR-SM	JC-S-S-LR-LR-SM	LR	LR	LR	LR	SM	SM	LR	SM	SM	(3,3)	6	2.1(1.9)--mp(<<,backward)				4.5(2.8)--pm(<<,backward)				1.6(0.5)--pm(>>,forward)
6az3.cif1	461	2.A.516.|2.C.442.-2.G.492.	2.A.517.|2.C.441.-2.G.493.	AnsA_LnsL_RnsR	JC-S-S-LC-LC-SM	JC-S-S-LC-LC-SM	SM	LC	LC	LC	SM	SM	LC	SM	SM	(2,2)	3	6.9(5.2)--pm(>>,forward)				0.4(0.1)--pm(<<,backward)				2.9(1.4)--pm(>>,forward)
6az3.cif1	462	2.A.541.|2.G.1356.-2.C.1368.	2.A.542.|2.G.1357.-2.C.1367.	AnsA_LnsL_RnR	HC-S-S-LR-LR-SM	HC-S-S-LR-LR-SM	SM	LR	LR	LR	SM	SM	LR	SM	SM	(2,2)	3	7.3(5.5)--pm(>>,forward)				3.7(1.0)--pm(>>,forward)
6az3.cif1	460	2.A.558.|2.C.438.-2.G.561.	2.A.559.|2.G.396.-2.U.432.	AnA_RsA	JC-S-S-LC-LC-SM	JC-S-S-LR-LR-SM	SM	LR	LR	LC	LR	LR	LC	LR	LR	(3,3)	6							2.8(1.0)--mm(<>,outward)
6az3.cif1	463	2.A.1070.|1.U.1181.-1.G.1191.	2.A.1071.|1.C.1182.-1.OMG.1190.	AnsA_LnL_RnsR	HC-S-S-LR-LR-SM	HC-S-S-LR-LR-SM	SM	LR	LR	LR	SM	SM	LR	SM	SM	(2,2)	3	1.2(0.8)--pm(>>,forward)								4.2(2.9)--pm(<<,backward)
6az3.cif1	464	3.A.8.|3.C.102.-3.G.132.	3.A.9.|3.C.101.-3.G.133.	AnsA_LnL_RnsR	HC-S-S-LR-LR-SM	HC-S-S-LR-LR-SM	SM	LR	LR	LR	SM	SM	LR	SM	SM	(2,2)	3	6.4(4.0)--pm(>>,forward)								3.5(1.5)--pm(>>,forward)
6az3.cif1	465	3.A.14.|1.U.1779.-2.A.5.	3.A.15.|1.G.1780.-2.C.4.	AnsA_LnsL_RnR_RsL	JIJP-S-S-LR-LR-SM	JIJP-S-S-LR-LR-SM	SM	LR	LR	LR	SM	SM	LR	SM	SM	(2,2)	3	6.0(4.3)--pm(>>,forward)				1.0(0.6)--pm(>>,forward)			2.3(0.3)--mm(<>,outward)
6az3.cif1	466	3.A.69.|1.C.1748.-1.G.1768.	3.A.70.|1.C.1747.-1.A.1769.	AnsA_LnL_RnsR	JCJP-S-S-LR-LR-SM	JCJP-JP-JP-LR-LR-SM	SM	LR	LR	LR	LC	LC	LR	LC	LC	(2,2)	5	2.3(2.1)--pm(>>,forward)								2.9(1.4)--pm(>>,forward)
6az3.cif1	467	3.A.200.|1.C.1640.-1.G.1742.	3.A.201.|1.C.1640.-1.G.1742.	AnsA_LeL_ReR	ICJP-JP-JP-LR-LR-SM	ICJP-JP-JP-LR-LR-SM	SM	LR	LR	LR	SM	SM	LR	SM	SM	(2,1)	3	5.5(3.8)--pm(>>,forward)
6az3.cif1	468	7.A.1.|2.G.632.-2.C.1432.	7.A.2.|2.G.632.-2.C.1432.	AnsA_LeL_ReR	JI-S-S-LC-LC-SM	JI-S-S-LC-LC-SM	SM	LC	LC	LC	SM	SM	LC	SM	SM	(2,1)	3	6.0(4.0)--pm(>>,forward)
6az3.cif1	469	7.A.59.|7.C.45.-7.G.58.	7.A.61.|7.G.46.-7.C.57.	AsA_LnsL_RnR_RsL	HP-S-S-LC-LC-SM	HP-S-S-LC-LC-SM	SM	LC	LC	LC	SM	SM	LC	SM	SM	(2,2)	3	1.1(0.6)--pm(>>,forward)				0.5(0.1)--pm(>>,forward)			2.7(0.5)--mm(<>,outward)
6az3.cif1	470	8.A.24.|8.G.3.-8.C.120.	8.A.25.|8.G.3.-8.C.120.	AnsA_LeL_ReR	IC-S-S-LR-LR-SM	IC-S-S-LR-LR-SM	SM	LR	LR	LR	SM	SM	LR	SM	SM	(2,2)	3	5.5(4.0)--pm(>>,forward)
6az3.cif1	470	8.A.24.|8.G.3.-8.C.120.	8.A.25.|8.A.4.-8.U.119.	AnsA_LnsL_RnR	IC-S-S-LR-LR-SM	IC-S-S-LR-LR-SM	SM	LR	LR	LR	SM	SM	LR	SM	SM	(2,2)	3	5.5(4.0)--pm(>>,forward)				3.9(1.8)--pm(>>,forward)
6az3.cif1	470	8.A.25.|8.G.3.-8.C.120.	8.A.25.|8.A.4.-8.U.119.	AeA_LnsL_RnR	IC-S-S-LR-LR-SM	IC-S-S-LR-LR-SM	SM	LR	LR	LR	SM	SM	LR	SM	SM	(2,2)	3					3.9(1.8)--pm(>>,forward)
6az3.cif1	471	8.A.52.|8.C.31.-8.G.50.	8.A.56.|8.C.30.-8.G.53.	AnsR_LnsL	BC-S-S-LC-LC-SM	IC-S-S-LC-LC-SM	LR	LC	LC	LR	LR	LR	LR	LR	LR	(3,3)	6			3.6(2.2)--pm(>>,forward)		3.2(0.6)--pm(<<,backward)
6az3.cif1	471	8.A.56.|8.A.29.-8.U.54.	8.A.56.|8.C.30.-8.G.53.	AeA_LnsL_RnsR	IC-S-S-LC-LC-SM	IC-S-S-LC-LC-SM	SM	LC	LC	LC	SM	SM	LC	SM	SM	(3,3)	6					5.1(3.7)--pm(>>,forward)				6.5(3.6)--pm(<<,backward)
6az3.cif1	471	8.A.56.|8.A.29.-8.U.54.	8.A.57.|8.A.29.-8.U.54.	AnsA_LeL_ReR	IC-S-S-LC-LC-SM	IC-S-S-LC-LC-SM	SM	LC	LC	LC	SM	SM	LC	SM	SM	(3,3)	6	3.8(3.0)--pm(>>,forward)
6az3.cif1	471	8.A.56.|8.C.30.-8.G.53.	8.A.57.|8.A.29.-8.U.54.	AnsA_LnsL_RnsR	IC-S-S-LC-LC-SM	IC-S-S-LC-LC-SM	SM	LC	LC	LC	SM	SM	LC	SM	SM	(3,3)	6	3.8(3.0)--pm(>>,forward)				5.1(3.7)--pm(<<,backward)				6.5(3.6)--pm(>>,forward)
6dlr.cif1	472	A.A.87.|A.G.15.-A.C.45.	A.A.88.|A.G.15.-A.C.45.	AnsA_LeL_ReR	HC-S-S-LR-LR-SM	HC-S-S-LR-LR-SM	SM	LR	LR	LR	SM	SM	LR	SM	SM	(2,1)	3	4.3(3.1)--pm(>>,forward)
6dme.cif1	473	A.A.82.|A.G.16.-A.A.38.	A.A.84.|A.G.15.-A.C.39.	LnsL_RnsR	HC-IC-IC-LR-LR-SM	HC-S-S-LR-LR-SM	SM	LR	LR	LR	LC	LC	LR	LC	LC	(3,3)	5					4.2(2.4)--pm(<<,backward)				5.8(4.0)--pm(>>,forward)
6dme.cif1	473	A.A.84.|A.G.15.-A.C.39.	A.A.85.|A.G.14.-A.C.40.	AnsA_LnsL_RnR	HC-S-S-LR-LR-SM	HC-S-S-LR-LR-SM	SM	LR	LR	LR	SM	SM	LR	SM	SM	(3,3)	5	2.6(1.9)--pm(>>,forward)				3.6(1.9)--pm(<<,backward)
6dtd.cif1	474	C.A.30.|C.G.11.-C.U.28.	C.A.30.|C.C.12.-C.G.27.	AeA_LnsL_RnsR	IC-S-S-LC-LC-SM	IC-S-S-LC-LC-SM	SM	LC	LC	LC	SM	SM	LC	SM	SM	(1,2)	3					7.3(4.2)--pm(>>,forward)				7.0(4.5)--pm(<<,backward)
6e1s.cif1	475	A.A.26.|A.G.4.-A.C.17.	A.A.27.|A.G.5.-A.C.16.	AnsA_LnsL_RnR	HC-S-S-LC-LC-SM	HC-S-S-LC-LC-SM	SM	LC	LC	LC	SM	SM	LC	SM	SM	(3,2)	3	5.3(3.9)--pm(>>,forward)				3.7(2.3)--pm(>>,forward)
6e1s.cif1	475	A.A.26.|A.G.4.-A.C.17.	A.A.28.|A.G.5.-A.C.16.	LnsL_RnR	HC-S-S-LC-LC-SM	HC-S-S-LC-LC-SM	SM	LC	LC	LC	SM	SM	LC	SM	SM	(3,2)	3					3.7(2.3)--pm(>>,forward)
6e1s.cif1	475	A.A.27.|A.G.5.-A.C.16.	A.A.28.|A.G.5.-A.C.16.	AnA_LeL_ReR	HC-S-S-LC-LC-SM	HC-S-S-LC-LC-SM	SM	LC	LC	LC	SM	SM	LC	SM	SM	(3,2)	3
6eri.cif1	476	AA.A.70.|AA.C.56.-AA.G.69.	AA.A.72.|AA.G.57.-AA.C.68.	AsA_LnsL_RnR_RsL	HP-S-S-LC-LC-SM	HP-S-S-LC-LC-SM	SM	LC	LC	LC	SM	SM	LC	SM	SM	(2,2)	3	2.2(1.3)--pm(>>,forward)				1.0(0.4)--pm(>>,forward)			1.8(0.1)--mm(<>,outward)
6eri.cif1	477	AA.A.124.|AA.G.53.-AA.C.114.	AA.A.125.|AA.G.54.-AA.C.113.	AnsA_LnsL_RnR	HC-S-S-LR-LR-SM	HC-S-S-LR-LR-SM	SM	LR	LR	LR	SM	SM	LR	SM	SM	(2,2)	3	6.5(4.5)--pm(>>,forward)				3.7(2.0)--pm(>>,forward)
6eri.cif1	478	AA.A.144.|AA.A.2223.-AA.G.2232.	AA.A.145.|AA.C.2222.-AA.G.2233.	AnsA_LnsL_RnsR	HC-HC-HC-LR-LR-SM	HC-S-S-LR-LR-SM	SM	LR	LR	LR	LC	LC	LR	LC	LC	(2,2)	4	5.8(4.3)--pm(>>,forward)				1.4(0.6)--pm(<<,backward)				3.1(1.6)--pm(>>,forward)
6eri.cif1	479	AA.A.166.|AA.G.44.-AA.C.445.	AA.A.444.|AA.C.168.-AA.G.199.	RnsA	JC-S-S-LC-LC-SM	JCJP-JC-JC-SM-SM-SM	SM	SM	SM	LC	LC	LC	LC	LC	LC	(3,2)	5							3.3(2.3)--pm(<<,backward)
6eri.cif1	480	AA.A.175.|AA.U.690.-AA.A.809.	AA.A.176.|AA.C.689.-AA.G.810.	AnsA_LnsL_RnsR	HC-S-S-LR-LR-SM	HC-S-S-LR-LR-SM	SM	LR	LR	LR	SM	SM	LR	SM	SM	(2,2)	3	6.3(4.3)--pm(>>,forward)				2.5(1.0)--pm(<<,backward)				2.5(2.3)--pm(>>,forward)
6eri.cif1	481	AA.A.184.|AA.C.2092.-AA.G.2259.	AA.A.2451.|AA.A.2091.-AA.U.2260.	AsA_LnsL_RnsR	HC-S-S-LR-LR-SM	JI-S-S-LC-LC-SM	LR	LR	LR	LC	SM	SM	LC	SM	SM	(2,2)	4	2.1(0.6)--mm(<>,outward)				2.8(1.7)--pm(<<,backward)				7.0(2.7)--pm(>>,forward)
6eri.cif1	479	AA.A.201.|AA.C.168.-AA.G.199.	AA.A.444.|AA.C.168.-AA.G.199.	AsA_LeL_ReR	JC-JC-JC-SM-SM-SM	JCJP-JC-JC-SM-SM-SM	SM	SM	SM	SM	SM	SM	SM	SM	SM	(3,2)	5	4.4(2.5)--mm(<>,outward)
6eri.cif1	482	AA.A.211.|AA.A.421.-AA.U.430.	AA.A.212.|AA.G.422.-AA.C.429.	AnsA_LnsL_RnsR	HC-S-S-LR-LR-SM	HC-S-S-LR-LR-SM	SM	LR	LR	LR	SM	SM	LR	SM	SM	(3,2)	3	6.4(4.6)--pm(>>,forward)				5.0(3.9)--pm(>>,forward)				0.6(0.1)--pm(<<,backward)
6eri.cif1	482	AA.A.211.|AA.A.421.-AA.U.430.	AA.A.213.|AA.G.422.-AA.C.429.	LnsL_RnsR	HC-S-S-LR-LR-SM	HC-S-S-LR-LR-SM	SM	LR	LR	LR	SM	SM	LR	SM	SM	(3,2)	3					5.0(3.9)--pm(>>,forward)				0.6(0.1)--pm(<<,backward)
6eri.cif1	482	AA.A.212.|AA.G.422.-AA.C.429.	AA.A.213.|AA.G.422.-AA.C.429.	AnA_LeL_ReR	HC-S-S-LR-LR-SM	HC-S-S-LR-LR-SM	SM	LR	LR	LR	SM	SM	LR	SM	SM	(3,2)	3
6eri.cif1	483	AA.A.256.|AA.G.277.-AA.C.380.	AA.A.257.|AA.G.278.-AA.C.379.	AnsA_LnsL_RnR	JC-S-S-LC-LC-SM	JC-S-S-LC-LC-SM	SM	LC	LC	LC	SM	SM	LC	SM	SM	(2,2)	3	7.7(5.8)--pm(>>,forward)				3.8(2.3)--pm(>>,forward)
6eri.cif1	484	AA.A.304.|AA.G.79.-AA.C.104.	AA.A.355.|AA.C.78.-AA.G.105.	LnsL_LsR_RnR	IC-S-S-LR-LR-SM	IC-S-S-LR-LR-SM	SM	LR	LR	LR	SM	SM	LR	SM	SM	(2,2)	4					1.2(0.5)--pm(<<,backward)	3.7(1.1)--mm(<>,outward)
6eri.cif1	485	AA.A.309.|AA.C.328.-AA.G.332.	AA.A.310.|AA.C.327.-AA.G.342.	AnsA_LnL_RsR	JI-HP-HP-LR-LR-SM	JI-S-S-LC-LC-SM	SM	LC	LC	LR	LC	LC	LR	LC	LC	(2,2)	4	7.6(5.8)--pm(>>,forward)								3.5(0.7)--pm(>>,forward)
6eri.cif1	486	AA.A.396.|AA.G.230.-AA.C.238.	AA.A.402.|AA.C.397.-AA.G.423.	AnsL	HC-S-S-LR-LR-SM	HC-HC-HP-SM-LR-LR	SM	SM	LR	LR	LR	LR	LR	LR	LR	(2,2)	4		4.8(1.1)--pm(>>,forward)
6eri.cif1	487	AA.A.525.|AA.C.591.-AA.G.1280.	AA.A.526.|AA.C.590.-AA.G.1281.	AnsA_LnsL_RnsR	JCJP-S-S-LC-LC-SM	JCJP-S-S-LC-LC-SM	SM	LC	LC	LC	SM	SM	LC	SM	SM	(2,2)	3	5.7(4.2)--pm(>>,forward)				1.5(0.2)--pm(<<,backward)				4.8(3.6)--pm(>>,forward)
6eri.cif1	488	AA.A.596.|AA.C.682.-AA.G.820.	AA.A.1275.|AA.C.683.-AA.G.819.	LnL_RnsR	JC-S-S-LC-LC-SM	JC-S-S-LC-LC-SM	SM	LC	LC	LC	SM	SM	LC	SM	SM	(3,3)	7									4.6(3.2)--pm(<<,backward)
6eri.cif1	489	AA.A.618.|AA.C.223.-AA.G.244.	AA.A.619.|AA.C.222.-AA.G.245.	AnsA_LnL_RnsR	IC-S-S-LR-LR-SM	IC-S-S-LR-LR-SM	SM	LR	LR	LR	SM	SM	LR	SM	SM	(3,2)	4	6.4(4.5)--pm(>>,forward)								2.9(1.4)--pm(>>,forward)
6eri.cif1	489	AA.A.618.|AA.C.223.-AA.G.244.	AA.A.633.|AA.C.223.-AA.G.244.	AsA_LeL_ReR	IC-S-S-LR-LR-SM	IC-S-S-LR-LR-SM	SM	LR	LR	LR	SM	SM	LR	SM	SM	(3,2)	4	5.4(2.8)--mm(<>,outward)
6eri.cif1	489	AA.A.619.|AA.C.222.-AA.G.245.	AA.A.633.|AA.C.223.-AA.G.244.	LnL_RnsR	IC-S-S-LR-LR-SM	IC-S-S-LR-LR-SM	SM	LR	LR	LR	SM	SM	LR	SM	SM	(3,2)	4									2.9(1.4)--pm(<<,backward)
6eri.cif1	490	AA.A.686.|AA.A.2081.-AA.U.2460.	AA.A.687.|AA.G.2083.-AA.C.2459.	AnsA_LsL_RnR	IC-S-S-LR-LR-SM	IC-S-S-LR-LR-SM	SM	LR	LR	LR	LR	LR	LR	LR	LR	(2,2)	5	7.5(5.7)--pm(>>,forward)				3.6(2.6)--pm(>>,forward)
6eri.cif1	491	AA.A.696.|AA.G.789.-AA.C.797.	AA.A.785.|AA.G.788.-AA.C.798.	LnsL_RnsR	JC-S-S-LC-LC-SM	JC-S-S-LC-LC-SM	SM	LC	LC	LC	SM	SM	LC	SM	SM	(2,2)	4					3.9(2.5)--pm(<<,backward)				0.4(0.1)--pm(>>,forward)
6eri.cif1	492	AA.A.704.|AA.A.1374.-AA.U.1400.	AA.A.1375.|AA.C.703.-AA.G.781.	AnL_AsR_LnsA	S-IC-IC-LR-LR-SM	IC-S-S-LR-LR-SM	LR	SM	SM	SM	LR	LR	SM	LR	LR	(2,2)	4			1.4(0.1)--mm(<>,outward)	6.1(4.1)--pm(>>,forward)
6eri.cif1	493	AA.A.919.|AA.C.2281.-AA.G.2293.	AA.A.920.|AA.C.2280.-AA.G.2294.	AnsA_LnsL_RnsR	IC-S-S-LR-LR-SM	IC-S-S-LR-LR-SM	SM	LR	LR	LR	SM	SM	LR	SM	SM	(2,2)	3	6.3(4.5)--pm(>>,forward)				1.2(0.4)--pm(<<,backward)				2.3(0.8)--pm(>>,forward)
6eri.cif1	494	AA.A.987.|AA.U.2474.-AA.G.2511.	AA.A.988.|AA.C.2473.-AA.G.2512.	AnsA_LnsL_RnsR	HC-S-S-LR-LR-SM	HC-S-S-LR-LR-SM	SM	LR	LR	LR	SM	SM	LR	SM	SM	(3,3)	4	6.5(4.7)--pm(>>,forward)				3.5(1.6)--pm(<<,backward)				3.3(1.8)--pm(>>,forward)
6eri.cif1	494	AA.A.988.|AA.C.2473.-AA.G.2512.	AA.A.2045.|AA.G.2472.-AA.C.2513.	LnsL_RnsR	HC-S-S-LR-LR-SM	HC-S-S-LR-LR-SM	LR	LR	LR	LR	SM	SM	LR	SM	SM	(3,3)	4					5.1(2.2)--pm(<<,backward)				7.2(4.0)--pm(>>,forward)
6eri.cif1	495	AA.A.1008.|AA.U.2040.-AA.G.2051.	AA.A.1009.|AA.G.2041.-AA.C.2050.	AnsA_LnL_RnR_RsL	HC-S-S-LR-LR-SM	HC-S-S-LR-LR-SM	SM	LR	LR	LR	SM	SM	LR	SM	SM	(2,2)	3	6.4(4.4)--pm(>>,forward)							3.4(0.9)--mm(<>,outward)
6eri.cif1	496	AA.A.1028.|AA.G.1004.-AA.C.1015.	AA.A.1029.|AA.G.1005.-AA.C.1014.	AnsA_LnsL_RnsR	IC-S-S-LR-LR-SM	IC-S-S-LR-LR-SM	SM	LR	LR	LR	SM	SM	LR	SM	SM	(5,4)	7	5.4(3.9)--pm(>>,forward)				3.6(2.2)--pm(>>,forward)				0.4(0.1)--pm(<<,backward)
6eri.cif1	496	AA.A.1028.|AA.G.1004.-AA.C.1015.	AA.A.1182.|AA.G.1004.-AA.C.1015.	AsA_LeL_ReR	IC-S-S-LR-LR-SM	IC-S-S-LR-LR-SM	SM	LR	LR	LR	SM	SM	LR	SM	SM	(5,4)	7	4.3(2.0)--mm(<>,outward)
6eri.cif1	496	AA.A.1029.|AA.G.1005.-AA.C.1014.	AA.A.1037.|AA.G.1030.-AA.C.1180.	AnsL	IC-S-S-LR-LR-SM	IP-S-S-LR-LR-SM	LR	LC	LC	LR	LR	LR	LR	LR	LR	(5,4)	7		1.2(0.2)--pm(>>,forward)
6eri.cif1	496	AA.A.1029.|AA.G.1005.-AA.C.1014.	AA.A.1182.|AA.G.1004.-AA.C.1015.	LnsL_RnsR	IC-S-S-LR-LR-SM	IC-S-S-LR-LR-SM	SM	LR	LR	LR	SM	SM	LR	SM	SM	(5,4)	7					3.6(2.2)--pm(<<,backward)				0.4(0.1)--pm(>>,forward)
6eri.cif1	496	AA.A.1037.|AA.G.1030.-AA.C.1180.	AA.A.1038.|AA.G.1031.-AA.C.1179.	AnsA_LnsL_RnR	IP-S-S-LR-LR-SM	IP-S-S-LR-LR-SM	SM	LR	LR	LR	SM	SM	LR	SM	SM	(5,4)	7	6.7(4.5)--pm(>>,forward)				4.6(3.0)--pm(>>,forward)
6eri.cif1	497	AA.A.1056.|AA.C.2481.-AA.G.2503.	AA.A.1057.|AA.C.2482.-AA.G.2502.	AnsA_LnsL_RnsR	IP-S-S-LR-LR-SM	IP-S-S-LR-LR-SM	SM	LR	LR	LR	SM	SM	LR	SM	SM	(3,3)	4	1.4(1.3)--pm(>>,forward)				0.9(0.3)--pm(>>,forward)				3.2(1.6)--pm(<<,backward)
6eri.cif1	497	AA.A.1056.|AA.C.2481.-AA.G.2503.	AA.A.1155.|AA.U.2480.-AA.A.2504.	LnL_RnsR	IP-S-S-LR-LR-SM	IP-S-S-LR-LR-SM	SM	LR	LR	LR	SM	SM	LR	SM	SM	(3,3)	4									2.8(1.0)--pm(>>,forward)
6eri.cif1	498	AA.A.1112.|AA.A.1082.-AA.U.1133.	AA.A.1113.|AA.G.1083.-AA.C.1132.	AnsA_LnsL_RnsR	JC-S-S-LC-LC-SM	JC-S-S-LC-LC-SM	SM	LC	LC	LC	SM	SM	LC	SM	SM	(2,2)	3	5.0(2.0)--pm(>>,forward)				3.0(2.6)--pm(>>,forward)				5.0(2.1)--pm(<<,backward)
6eri.cif1	488	AA.A.1275.|AA.C.683.-AA.G.819.	AA.A.2074.|AA.C.684.-AA.U.818.	LnL_RnsR	JC-S-S-LC-LC-SM	JCJP-IC-IC-LR-LR-SM	LR	LR	LR	LR	LC	LC	LR	LC	LC	(3,3)	7									2.6(1.5)--pm(<<,backward)
6eri.cif1	499	AA.A.1294.|AA.C.1694.-AA.G.2016.	AA.A.2730.|AA.U.1695.-AA.A.2015.	LnsL_RnsR	JC-S-S-LR-LR-SM	BC-S-S-LR-LR-SM	LR	LR	LR	LR	SM	SM	LR	SM	SM	(2,2)	4					1.1(0.3)--pm(>>,forward)				3.7(3.1)--pm(<<,backward)
6eri.cif1	500	AA.A.1295.|AA.C.1317.-AA.G.1680.	AA.A.1296.|AA.C.1316.-AA.G.1681.	AnA_LnsL_RnsR	JC-S-S-LC-LC-SM	JC-S-S-LC-LC-SM	SM	LC	LC	LC	SM	SM	LC	SM	SM	(3,3)	4					2.2(0.8)--pm(<<,backward)				2.9(1.3)--pm(>>,forward)
6eri.cif1	500	AA.A.1295.|AA.C.1317.-AA.G.1680.	AA.A.1323.|AA.C.1318.-AA.G.1679.	LnL_RnsR	JC-S-S-LC-LC-SM	JC-S-S-LC-LC-SM	LR	LC	LC	LC	SM	SM	LC	SM	SM	(3,3)	4									3.8(2.0)--pm(<<,backward)
6eri.cif1	501	AA.A.1413.|AA.C.1336.-AA.G.1358.	AA.A.1414.|AA.C.1335.-AA.G.1359.	AnsA_LnL_RnsR	HC-S-S-LR-LR-SM	HC-S-S-LR-LR-SM	SM	LR	LR	LR	SM	SM	LR	SM	SM	(2,2)	3	7.3(5.4)--pm(>>,forward)								3.9(2.5)--pm(>>,forward)
6eri.cif1	502	AA.A.1488.|AA.C.1407.-AA.G.1422.	AA.A.1489.|AA.A.1406.-AA.U.1423.	AnsA_LnsL_RnsR	JCJP-S-S-LR-LR-SM	JCJP-S-S-LR-LR-SM	SM	LR	LR	LR	SM	SM	LR	SM	SM	(2,2)	3	1.3(1.1)--pm(>>,forward)				3.3(1.7)--pm(<<,backward)				7.0(4.5)--pm(>>,forward)
6eri.cif1	503	AA.A.1533.|AA.C.1442.-AA.G.1611.	AA.A.1534.|AA.G.1443.-AA.C.1610.	AnsA_LnL_RnsR_RsL	HC-S-S-LR-LR-SM	HC-S-S-LR-LR-SM	SM	LR	LR	LR	SM	SM	LR	SM	SM	(3,2)	4	6.2(4.3)--pm(>>,forward)							2.6(0.5)--mm(<>,outward)	1.0(0.4)--pm(<<,backward)
6eri.cif1	503	AA.A.1533.|AA.C.1442.-AA.G.1611.	AA.A.1613.|AA.C.1442.-AA.G.1611.	LeL_ReR	HC-S-S-LR-LR-SM	ICJP-S-S-LC-LC-SM	LR	LR	LR	LC	SM	SM	LC	SM	SM	(3,2)	4
6eri.cif1	503	AA.A.1534.|AA.G.1443.-AA.C.1610.	AA.A.1613.|AA.C.1442.-AA.G.1611.	LnL_LsR_RnsR	HC-S-S-LR-LR-SM	ICJP-S-S-LC-LC-SM	LR	LR	LR	LC	SM	SM	LC	SM	SM	(3,2)	4						2.6(0.5)--mm(<>,outward)			1.0(0.4)--pm(>>,forward)
6eri.cif1	504	AA.A.1578.|AA.C.1468.-AA.G.1483.	AA.A.1579.|AA.C.1467.-AA.G.1484.	AnsA_LnsL_RnsR	JCJP-S-S-LC-LC-SM	JCJP-S-S-LC-LC-SM	SM	LC	LC	LC	SM	SM	LC	SM	SM	(2,2)	3	6.3(4.2)--pm(>>,forward)				1.0(0.3)--pm(<<,backward)				3.6(2.3)--pm(>>,forward)
6eri.cif1	505	AA.A.1603.|AA.C.1372.-AA.G.1401.	AA.A.1604.|AA.C.1372.-AA.G.1401.	AnsA_LeL_ReR	ICJP-S-S-LR-LR-SM	ICJP-S-S-LR-LR-SM	SM	LR	LR	LR	SM	SM	LR	SM	SM	(4,2)	3	5.6(4.1)--pm(>>,forward)
6eri.cif1	505	AA.A.1603.|AA.C.1372.-AA.G.1401.	AA.A.1605.|AA.C.1372.-AA.G.1401.	LeL_ReR	ICJP-S-S-LR-LR-SM	ICJP-S-S-LR-LR-SM	SM	LR	LR	LR	SM	SM	LR	SM	SM	(4,2)	3
6eri.cif1	505	AA.A.1603.|AA.C.1372.-AA.G.1401.	AA.A.1606.|AA.C.1371.-AA.G.1402.	LnL_RnsR	ICJP-S-S-LR-LR-SM	ICJP-S-S-LR-LR-SM	SM	LR	LR	LR	SM	SM	LR	SM	SM	(4,2)	3									3.1(1.6)--pm(>>,forward)
6eri.cif1	505	AA.A.1604.|AA.C.1372.-AA.G.1401.	AA.A.1605.|AA.C.1372.-AA.G.1401.	AnsA_LeL_ReR	ICJP-S-S-LR-LR-SM	ICJP-S-S-LR-LR-SM	SM	LR	LR	LR	SM	SM	LR	SM	SM	(4,2)	3	4.7(3.6)--pm(>>,forward)
6eri.cif1	505	AA.A.1604.|AA.C.1372.-AA.G.1401.	AA.A.1606.|AA.C.1371.-AA.G.1402.	LnL_RnsR	ICJP-S-S-LR-LR-SM	ICJP-S-S-LR-LR-SM	SM	LR	LR	LR	SM	SM	LR	SM	SM	(4,2)	3									3.1(1.6)--pm(>>,forward)
6eri.cif1	505	AA.A.1605.|AA.C.1372.-AA.G.1401.	AA.A.1606.|AA.C.1371.-AA.G.1402.	AnsA_LnL_RnsR	ICJP-S-S-LR-LR-SM	ICJP-S-S-LR-LR-SM	SM	LR	LR	LR	SM	SM	LR	SM	SM	(4,2)	3	3.7(3.2)--pm(>>,forward)								3.1(1.6)--pm(>>,forward)
6eri.cif1	506	AA.A.1704.|AA.G.1710.-AA.C.2004.	AA.A.1713.|AA.G.1710.-AA.C.2004.	AsL_LeL_ReR	JC-JC-JC-SM-SM-SM	JC-JC-JC-SM-SM-SM	SM	SM	SM	SM	SM	SM	SM	SM	SM	(2,1)	2		6.1(4.0)--pm(>>,forward)
6eri.cif1	507	AA.A.1764.|AA.A.2710.-AA.U.2734.	AA.A.1765.|AA.G.2711.-AA.C.2733.	AnsA_LnsL_RnsR	JC-S-S-LR-LR-SM	JC-S-S-LR-LR-SM	SM	LR	LR	LR	SM	SM	LR	SM	SM	(2,2)	3	6.2(3.9)--pm(>>,forward)				1.3(1.3)--pm(>>,forward)				1.6(0.5)--pm(<<,backward)
6eri.cif1	508	AA.A.1795.|AA.G.2605.-AA.C.2623.	AA.A.1952.|AA.A.2606.-AA.U.2622.	LnsL_RnR	HC-S-S-LR-LR-SM	JC-S-S-LR-LR-SM	LR	LR	LR	LR	SM	SM	LR	SM	SM	(2,2)	4					6.0(3.8)--pm(>>,forward)
6eri.cif1	509	AA.A.1812.|AA.C.1808.-AA.G.1831.	AA.A.1813.|AA.C.1807.-AA.G.1832.	AnsA_LnsL_RnsR	IC-S-S-LC-LC-SM	IC-S-S-LC-LC-SM	SM	LC	LC	LC	SM	SM	LC	SM	SM	(2,2)	3	5.1(3.8)--pm(>>,forward)				0.5(0.1)--pm(<<,backward)				3.7(2.4)--pm(>>,forward)
6eri.cif1	510	AA.A.1819.|AA.C.1384.-AA.G.1389.	AA.A.1820.|AA.C.1383.-AA.G.1390.	AnsA_LnsL_RnsR	HC-S-S-LR-LR-SM	HC-S-S-LR-LR-SM	SM	LR	LR	LR	SM	SM	LR	SM	SM	(2,2)	3	7.5(5.6)--pm(>>,forward)				0.9(0.3)--pm(<<,backward)				2.3(0.8)--pm(>>,forward)
6eri.cif1	511	AA.A.1863.|AA.U.2100.-AA.A.2250.	AA.A.1864.|AA.G.2101.-AA.C.2249.	AnsA_LnL_RnsR_RsL	IC-S-S-LR-LR-SM	IC-S-S-LR-LR-SM	SM	LR	LR	LR	SM	SM	LR	SM	SM	(4,3)	4	6.2(4.4)--pm(>>,forward)							1.4(0.7)--mm(<>,outward)	0.6(0.1)--pm(<<,backward)
6eri.cif1	511	AA.A.1863.|AA.U.2100.-AA.A.2250.	AA.A.1903.|AA.U.2100.-AA.A.2250.	AsA_LeL_ReR	IC-S-S-LR-LR-SM	IC-S-S-LR-LR-SM	SM	LR	LR	LR	SM	SM	LR	SM	SM	(4,3)	4	2.4(0.3)--mm(<>,outward)
6eri.cif1	511	AA.A.1863.|AA.U.2100.-AA.A.2250.	AA.A.1904.|AA.C.2099.-AA.G.2251.	LnsL_RnsR	IC-S-S-LR-LR-SM	IC-S-S-LR-LR-SM	SM	LR	LR	LR	SM	SM	LR	SM	SM	(4,3)	4					1.7(0.6)--pm(<<,backward)				1.1(1.1)--pm(>>,forward)
6eri.cif1	511	AA.A.1864.|AA.G.2101.-AA.C.2249.	AA.A.1903.|AA.U.2100.-AA.A.2250.	LnL_LsR_RnsR	IC-S-S-LR-LR-SM	IC-S-S-LR-LR-SM	SM	LR	LR	LR	SM	SM	LR	SM	SM	(4,3)	4						1.4(0.7)--mm(<>,outward)			0.6(0.1)--pm(>>,forward)
6eri.cif1	511	AA.A.1903.|AA.U.2100.-AA.A.2250.	AA.A.1904.|AA.C.2099.-AA.G.2251.	AnsA_LnsL_RnsR	IC-S-S-LR-LR-SM	IC-S-S-LR-LR-SM	SM	LR	LR	LR	SM	SM	LR	SM	SM	(4,3)	4	5.9(4.3)--pm(>>,forward)				1.7(0.6)--pm(<<,backward)				1.1(1.1)--pm(>>,forward)
6eri.cif1	512	AA.A.1914.|AA.G.1803.-AA.C.1836.	AA.A.1984.|AA.G.1802.-AA.U.1837.	AsA_LnsL_RnsR	BC-S-S-LR-LR-SM	JC-S-S-LR-LR-SM	LR	LR	LR	LR	SM	SM	LR	SM	SM	(3,3)	6	2.3(2.1)--mp(<<,backward)				4.6(3.1)--pm(<<,backward)				1.4(0.5)--pm(>>,forward)
6eri.cif1	513	AA.A.1926.|BA.C.1357.-BA.U.1445.	AA.A.1933.|BA.C.1357.-BA.U.1445.	LeL_ReR	HC-IC-IC-LR-LR-SM	HC-IC-IC-LR-LR-SM	SM	LR	LR	LR	SM	SM	LR	SM	SM	(2,1)	3
6eri.cif1	514	AA.A.1941.|AA.C.1847.-AA.G.1917.	AA.A.1942.|AA.C.1846.-AA.G.1918.	AnsA_LnsL_RnsR	JC-S-S-LC-LC-SM	JC-S-S-LC-LC-SM	SM	LC	LC	LC	SM	SM	LC	SM	SM	(2,2)	3	6.3(4.5)--pm(>>,forward)				0.7(0.1)--pm(<<,backward)				2.9(1.4)--pm(>>,forward)
6eri.cif1	515	AA.A.1966.|AA.G.2565.-AA.C.2577.	AA.A.1967.|AA.G.2566.-AA.C.2576.	AnsA_LnsL_RnR	HC-S-S-LR-LR-SM	HC-S-S-LR-LR-SM	SM	LR	LR	LR	SM	SM	LR	SM	SM	(2,2)	3	7.3(5.4)--pm(>>,forward)				4.4(2.2)--pm(>>,forward)
6eri.cif1	512	AA.A.1983.|AA.C.1843.-AA.G.1986.	AA.A.1984.|AA.G.1802.-AA.U.1837.	AnA_RsA	JC-S-S-LC-LC-SM	JC-S-S-LR-LR-SM	SM	LR	LR	LC	LR	LR	LC	LR	LR	(3,3)	6							2.8(1.0)--mm(<>,outward)
6eri.cif1	516	AA.A.2290.|AA.G.981.-AA.U.992.	AA.A.2291.|AA.G.982.-AA.U.991.	AnsA_LnsL_RnR	HC-S-S-LR-LR-SM	HC-S-S-LR-LR-SM	SM	LR	LR	LR	SM	SM	LR	SM	SM	(2,2)	3	3.4(2.7)--pm(>>,forward)				2.6(1.1)--pm(>>,forward)
6eri.cif1	517	AA.A.2344.|AA.C.2278.-AA.G.2296.	AA.A.2405.|AA.C.2277.-AA.G.2297.	AsA_LnL_RnsR	HP-S-S-LR-LR-SM	JIJP-S-S-LC-LC-SM	LR	LR	LR	LC	SM	SM	LC	SM	SM	(2,2)	4	1.3(0.1)--mm(<>,outward)								4.0(2.1)--pm(>>,forward)
6eri.cif1	518	AA.A.2581.|AA.C.2538.-AA.G.2561.	AA.A.2582.|AA.C.2537.-AA.G.2562.	AnsA_LnL_RnsR	JC-S-S-LC-LC-SM	JC-S-S-LC-LC-SM	SM	LC	LC	LC	SM	SM	LC	SM	SM	(2,2)	3	7.4(5.4)--pm(>>,forward)								4.0(2.7)--pm(>>,forward)
6eri.cif1	519	AA.A.2758.|AA.G.2540.-AA.C.2557.	AA.A.2759.|AA.G.2541.-AA.C.2556.	AnsA_LnsL_RnR	IC-S-S-LR-LR-SM	IC-S-S-LR-LR-SM	SM	LR	LR	LR	SM	SM	LR	SM	SM	(3,2)	4	5.7(4.0)--pm(>>,forward)				4.3(2.9)--pm(>>,forward)
6eri.cif1	519	AA.A.2758.|AA.G.2540.-AA.C.2557.	AA.A.2782.|AA.G.2540.-AA.C.2557.	AsA_LeL_ReR	IC-S-S-LR-LR-SM	IC-S-S-LR-LR-SM	SM	LR	LR	LR	SM	SM	LR	SM	SM	(3,2)	4	5.3(2.9)--mm(<>,outward)
6eri.cif1	519	AA.A.2759.|AA.G.2541.-AA.C.2556.	AA.A.2782.|AA.G.2540.-AA.C.2557.	LnsL_RnR	IC-S-S-LR-LR-SM	IC-S-S-LR-LR-SM	SM	LR	LR	LR	SM	SM	LR	SM	SM	(3,2)	4					4.3(2.9)--pm(<<,backward)
6eri.cif1	520	AB.A.5.|AA.A.2647.-AA.U.2806.	AB.A.6.|AA.G.2648.-AA.C.2805.	AnsA_LnsL_RnsR	JI-S-S-LC-LC-SM	JI-S-S-LC-LC-SM	SM	LC	LC	LC	SM	SM	LC	SM	SM	(2,2)	3	7.4(5.5)--pm(>>,forward)				4.3(3.5)--pm(>>,forward)				0.8(0.1)--pm(<<,backward)
6eri.cif1	521	Ax.A.57.|Ax.A.29.-Ax.U.55.	Ax.A.57.|Ax.C.30.-Ax.G.54.	AeA_LnsL_RnsR	IC-S-S-LC-LC-SM	IC-S-S-LC-LC-SM	SM	LC	LC	LC	SM	SM	LC	SM	SM	(2,2)	3					5.3(3.7)--pm(>>,forward)				7.3(4.4)--pm(<<,backward)
6eri.cif1	521	Ax.A.57.|Ax.A.29.-Ax.U.55.	Ax.A.58.|Ax.A.29.-Ax.U.55.	AnsA_LeL_ReR	IC-S-S-LC-LC-SM	IC-S-S-LC-LC-SM	SM	LC	LC	LC	SM	SM	LC	SM	SM	(2,2)	3	5.3(3.4)--pm(>>,forward)
6eri.cif1	521	Ax.A.57.|Ax.C.30.-Ax.G.54.	Ax.A.58.|Ax.A.29.-Ax.U.55.	AnsA_LnsL_RnsR	IC-S-S-LC-LC-SM	IC-S-S-LC-LC-SM	SM	LC	LC	LC	SM	SM	LC	SM	SM	(2,2)	3	5.3(3.4)--pm(>>,forward)				5.3(3.7)--pm(<<,backward)				7.3(4.4)--pm(>>,forward)
6eri.cif1	522	BA.A.53.|BA.G.98.-BA.C.286.	BA.A.53.|BA.U.99.-BA.A.285.	AeA_LnsL_RnsR	JC-S-S-LR-LR-SM	JC-S-S-LR-LR-SM	SM	LR	LR	LR	SM	SM	LR	SM	SM	(3,2)	5					7.1(4.1)--pm(>>,forward)				4.6(3.0)--pm(<<,backward)
6eri.cif1	522	BA.A.53.|BA.G.98.-BA.C.286.	BA.A.101.|BA.U.99.-BA.A.285.	AsA_LnsL_RnsR	JC-S-S-LR-LR-SM	JC-S-S-LC-LC-SM	LR	LR	LR	LC	SM	SM	LC	SM	SM	(3,2)	5	3.1(0.3)--pm(>>,forward)				7.1(4.1)--pm(>>,forward)				4.6(3.0)--pm(<<,backward)
6eri.cif1	522	BA.A.53.|BA.G.98.-BA.C.286.	BA.A.325.|BA.G.98.-BA.C.286.	AsA_LeL_ReR	JC-S-S-LR-LR-SM	JC-S-S-LC-LC-SM	LR	LR	LR	LC	SM	SM	LC	SM	SM	(3,2)	5	6.6(4.7)--mm(<>,outward)
6eri.cif1	522	BA.A.53.|BA.U.99.-BA.A.285.	BA.A.101.|BA.U.99.-BA.A.285.	AsA_LeL_ReR	JC-S-S-LR-LR-SM	JC-S-S-LC-LC-SM	LR	LR	LR	LC	SM	SM	LC	SM	SM	(3,2)	5	3.1(0.3)--pm(>>,forward)
6eri.cif1	522	BA.A.53.|BA.U.99.-BA.A.285.	BA.A.325.|BA.G.98.-BA.C.286.	AsA_LnsL_RnsR	JC-S-S-LR-LR-SM	JC-S-S-LC-LC-SM	LR	LR	LR	LC	SM	SM	LC	SM	SM	(3,2)	5	6.6(4.7)--mm(<>,outward)				7.1(4.1)--pm(<<,backward)				4.6(3.0)--pm(>>,forward)
6eri.cif1	522	BA.A.101.|BA.U.99.-BA.A.285.	BA.A.325.|BA.G.98.-BA.C.286.	LnsL_RnsR	JC-S-S-LC-LC-SM	JC-S-S-LC-LC-SM	LR	LC	LC	LC	SM	SM	LC	SM	SM	(3,2)	5					7.1(4.1)--pm(<<,backward)				4.6(3.0)--pm(>>,forward)
6eri.cif1	523	BA.A.136.|BA.C.69.-BA.G.87.	BA.A.156.|BA.C.69.-BA.G.87.	LeL_ReR	IC-S-S-LR-LR-SM	IC-S-S-LR-LR-SM	SM	LR	LR	LR	SM	SM	LR	SM	SM	(5,4)	7
6eri.cif1	523	BA.A.136.|BA.C.69.-BA.G.87.	BA.A.157.|BA.A.68.-BA.U.88.	LnsL_RnsR	IC-S-S-LR-LR-SM	IC-S-S-LR-LR-SM	SM	LR	LR	LR	SM	SM	LR	SM	SM	(5,4)	7					1.8(1.3)--pm(<<,backward)				3.9(1.5)--pm(>>,forward)
6eri.cif1	524	BA.A.145.|BA.C.314.-BA.G.319.	BA.A.146.|BA.C.314.-BA.G.319.	AnsA_LeL_ReR	HC-S-S-LR-LR-SM	HC-S-S-LR-LR-SM	SM	LR	LR	LR	SM	SM	LR	SM	SM	(2,1)	3	6.3(4.0)--pm(>>,forward)
6eri.cif1	523	BA.A.156.|BA.C.69.-BA.G.87.	BA.A.157.|BA.A.68.-BA.U.88.	AnsA_LnsL_RnsR	IC-S-S-LR-LR-SM	IC-S-S-LR-LR-SM	SM	LR	LR	LR	SM	SM	LR	SM	SM	(5,4)	7	5.0(3.6)--pm(>>,forward)				1.8(1.3)--pm(<<,backward)				3.9(1.5)--pm(>>,forward)
6eri.cif1	523	BA.A.157.|BA.A.68.-BA.U.88.	BA.A.1396.|BA.A.133.-BA.A.159.	AsR	IC-S-S-LR-LR-SM	IC-IC-IC-LR-LR-SM	LR	SM	SM	LR	LR	LR	LR	LR	LR	(5,4)	7			3.3(1.5)--pm(>>,forward)
6eri.cif1	525	BA.A.179.|BA.G.126.-BA.C.194.	BA.A.180.|BA.G.127.-BA.C.193.	AnsA_LnsL_RnR	JC-S-S-LC-LC-SM	JC-S-S-LC-LC-SM	SM	LC	LC	LC	SM	SM	LC	SM	SM	(2,2)	3	6.6(4.8)--pm(>>,forward)				3.2(1.5)--pm(>>,forward)
6eri.cif1	526	BA.A.345.|BA.C.342.-BA.G.363.	BA.A.346.|BA.G.343.-BA.C.362.	AnsA_LnL_RnsR_RsL	IC-S-S-LC-LC-SM	IC-S-S-LC-LC-SM	SM	LC	LC	LC	SM	SM	LC	SM	SM	(3,2)	4	1.1(1.0)--pm(>>,forward)							2.7(0.4)--mm(<>,outward)	1.6(0.7)--pm(<<,backward)
6eri.cif1	526	BA.A.345.|BA.C.342.-BA.G.363.	BA.A.431.|BA.C.342.-BA.G.363.	AsA_LeL_ReR	IC-S-S-LC-LC-SM	HC-S-S-LR-LR-SM	LR	LC	LC	LR	SM	SM	LR	SM	SM	(3,2)	4	5.8(3.5)--mm(<>,outward)
6eri.cif1	526	BA.A.346.|BA.G.343.-BA.C.362.	BA.A.431.|BA.C.342.-BA.G.363.	LnL_LsR_RnsR	IC-S-S-LC-LC-SM	HC-S-S-LR-LR-SM	LR	LC	LC	LR	SM	SM	LR	SM	SM	(3,2)	4						2.7(0.4)--mm(<>,outward)			1.6(0.7)--pm(>>,forward)
6eri.cif1	527	BA.A.458.|BA.A.451.-BA.U.492.	BA.A.459.|BA.U.452.-BA.A.491.	AnsA_LnsL_RnsR	HP-S-S-LR-LR-SM	HP-S-S-LR-LR-SM	SM	LR	LR	LR	SM	SM	LR	SM	SM	(2,2)	3	7.0(5.0)--pm(>>,forward)				5.9(4.5)--pm(>>,forward)				4.2(3.0)--pm(<<,backward)
6eri.cif1	528	BA.A.521.|BA.C.21.-BA.G.866.	BA.A.814.|BA.C.20.-BA.G.867.	AsA_LnsL_RnsR	JP-S-S-LR-LR-SM	HPJP-S-S-LR-LR-SM	SM	LR	LR	LR	SM	SM	LR	SM	SM	(4,4)	7	1.3(0.1)--mm(<>,outward)				0.9(0.1)--pm(<<,backward)				1.9(0.5)--pm(>>,forward)
6eri.cif1	529	BA.A.522.|BA.G.516.-BA.C.833.	BA.A.523.|BA.G.517.-BA.C.832.	AnsA_LnsL_RnR	JP-S-S-LR-LR-SM	JP-S-S-LR-LR-SM	SM	LR	LR	LR	SM	SM	LR	SM	SM	(2,2)	3	7.0(5.0)--pm(>>,forward)				4.5(1.7)--pm(>>,forward)
6eri.cif1	530	BA.A.556.|BA.U.263.-BA.A.281.	BA.A.557.|BA.G.264.-BA.C.280.	AnsA_LnL_RnR_RsL	IC-S-S-LR-LR-SM	IC-S-S-LR-LR-SM	SM	LR	LR	LR	SM	SM	LR	SM	SM	(2,2)	3	5.7(3.6)--pm(>>,forward)							2.7(1.3)--mm(<>,outward)
6eri.cif1	531	BA.A.570.|BA.G.43.-BA.C.373.	BA.A.571.|BA.G.44.-BA.C.372.	AnsA_LnsL_RnsR	HC-S-S-LR-LR-SM	HC-S-S-LR-LR-SM	SM	LR	LR	LR	SM	SM	LR	SM	SM	(2,2)	3	6.5(4.6)--pm(>>,forward)				2.5(1.0)--pm(>>,forward)				2.5(0.9)--pm(<<,backward)
6eri.cif1	532	BA.A.677.|BA.U.527.-BA.A.712.	BA.A.678.|BA.G.526.-BA.C.713.	AnsA_LnsL_RnsR	HC-S-S-LR-LR-SM	HC-S-S-LR-LR-SM	SM	LR	LR	LR	SM	SM	LR	SM	SM	(2,2)	3	7.3(5.3)--pm(>>,forward)				7.0(4.1)--pm(<<,backward)				5.5(4.2)--pm(>>,forward)
6eri.cif1	533	BA.A.715.|BA.C.1460.-BA.G.1475.	BA.A.716.|BA.G.1461.-BA.C.1474.	AnsA_LnsL_RnsR	JP-S-S-LR-LR-SM	JP-S-S-LR-LR-SM	SM	LR	LR	LR	SM	SM	LR	SM	SM	(3,2)	4	4.4(1.6)--pm(>>,forward)				0.6(0.1)--pm(>>,forward)				1.7(0.6)--pm(<<,backward)
6eri.cif1	533	BA.A.715.|BA.C.1460.-BA.G.1475.	BA.A.763.|BA.C.1460.-BA.G.1475.	AsA_LeL_ReR	JP-S-S-LR-LR-SM	JP-S-S-LR-LR-SM	SM	LR	LR	LR	SM	SM	LR	SM	SM	(3,2)	4	6.9(4.3)--mm(<>,outward)
6eri.cif1	533	BA.A.716.|BA.G.1461.-BA.C.1474.	BA.A.763.|BA.C.1460.-BA.G.1475.	LnsL_RnsR	JP-S-S-LR-LR-SM	JP-S-S-LR-LR-SM	SM	LR	LR	LR	SM	SM	LR	SM	SM	(3,2)	4					0.6(0.1)--pm(<<,backward)				1.7(0.6)--pm(>>,forward)
6eri.cif1	528	BA.A.814.|BA.C.20.-BA.G.867.	BA.A.1029.|BA.U.19.-BA.A.868.	LnsL_RnsR	HPJP-S-S-LR-LR-SM	HC-S-S-LR-LR-SM	LR	LR	LR	LR	SM	SM	LR	SM	SM	(4,4)	7					1.2(0.2)--pm(<<,backward)				3.8(2.4)--pm(>>,forward)
6eri.cif1	534	BA.A.908.|BA.C.935.-BA.G.1169.	BA.A.909.|BA.C.934.-BA.G.1170.	AnsA_LnL_RnsR	JC-S-S-LC-LC-SM	JC-S-S-LC-LC-SM	SM	LC	LC	LC	SM	SM	LC	SM	SM	(2,2)	3	7.2(5.2)--pm(>>,forward)								4.2(2.8)--pm(>>,forward)
6eri.cif1	535	BA.A.965.|BA.G.937.-BA.C.1167.	BA.A.966.|BA.G.938.-BA.C.1166.	AnsA_LnsL_RnR	HC-S-S-LR-LR-SM	HC-S-S-LR-LR-SM	SM	LR	LR	LR	SM	SM	LR	SM	SM	(2,2)	3	6.6(4.6)--pm(>>,forward)				2.1(0.7)--pm(>>,forward)
6eri.cif1	528	BA.A.1029.|BA.U.19.-BA.A.868.	BA.A.1030.|BA.A.18.-BA.A.869.	AnsA_LnsL_RnsR	HC-S-S-LR-LR-SM	HC-HP-JI-LR-LR-LR	SM	LR	LR	LR	LC	LC	LR	LC	LC	(4,4)	7	4.5(3.2)--pm(>>,forward)				3.1(2.1)--pm(<<,backward)				6.3(4.1)--pm(>>,forward)
6eri.cif1	536	BA.A.1118.|BA.G.1038.-BA.C.1047.	BA.A.1119.|BA.G.1039.-BA.C.1046.	AnsA_LnsL_RnR	HC-S-S-LR-LR-SM	HC-S-S-LR-LR-SM	SM	LR	LR	LR	SM	SM	LR	SM	SM	(2,2)	3	4.4(3.6)--pm(>>,forward)				4.6(2.9)--pm(>>,forward)
6eri.cif1	537	BA.A.1199.|BA.G.1302.-BA.C.1319.	BA.A.1200.|BA.G.1302.-BA.C.1319.	AnsA_LeL_ReR	IC-S-S-LR-LR-SM	IC-S-S-LR-LR-SM	SM	LR	LR	LR	SM	SM	LR	SM	SM	(5,4)	4	6.2(4.5)--pm(>>,forward)
6eri.cif1	537	BA.A.1199.|BA.G.1302.-BA.C.1319.	BA.A.1200.|BA.C.1303.-BA.G.1318.	AnsA_LnsL_RnsR	IC-S-S-LR-LR-SM	IC-S-S-LR-LR-SM	SM	LR	LR	LR	SM	SM	LR	SM	SM	(5,4)	4	6.2(4.5)--pm(>>,forward)				4.0(1.5)--pm(>>,forward)				4.1(1.9)--pm(<<,backward)
6eri.cif1	537	BA.A.1199.|BA.G.1302.-BA.C.1319.	BA.A.1236.|BA.C.1301.-BA.G.1320.	AsA_LnsL_RnsR	IC-S-S-LR-LR-SM	IC-S-S-LR-LR-SM	SM	LR	LR	LR	SM	SM	LR	SM	SM	(5,4)	4	6.4(4.1)--mm(<>,outward)				2.6(1.0)--pm(<<,backward)				3.0(1.2)--pm(>>,forward)
6eri.cif1	537	BA.A.1199.|BA.G.1302.-BA.C.1319.	BA.A.1237.|BA.C.1301.-BA.G.1320.	LnsL_RnsR	IC-S-S-LR-LR-SM	IC-S-S-LR-LR-SM	SM	LR	LR	LR	SM	SM	LR	SM	SM	(5,4)	4					2.6(1.0)--pm(<<,backward)				3.0(1.2)--pm(>>,forward)
6eri.cif1	537	BA.A.1200.|BA.G.1302.-BA.C.1319.	BA.A.1200.|BA.C.1303.-BA.G.1318.	AeA_LnsL_RnsR	IC-S-S-LR-LR-SM	IC-S-S-LR-LR-SM	SM	LR	LR	LR	SM	SM	LR	SM	SM	(5,4)	4					4.0(1.5)--pm(>>,forward)				4.1(1.9)--pm(<<,backward)
6eri.cif1	537	BA.A.1200.|BA.G.1302.-BA.C.1319.	BA.A.1236.|BA.C.1301.-BA.G.1320.	LnsL_RnsR	IC-S-S-LR-LR-SM	IC-S-S-LR-LR-SM	SM	LR	LR	LR	SM	SM	LR	SM	SM	(5,4)	4					2.6(1.0)--pm(<<,backward)				3.0(1.2)--pm(>>,forward)
6eri.cif1	537	BA.A.1200.|BA.G.1302.-BA.C.1319.	BA.A.1237.|BA.C.1301.-BA.G.1320.	LnsL_RnsR	IC-S-S-LR-LR-SM	IC-S-S-LR-LR-SM	SM	LR	LR	LR	SM	SM	LR	SM	SM	(5,4)	4					2.6(1.0)--pm(<<,backward)				3.0(1.2)--pm(>>,forward)
6eri.cif1	537	BA.A.1236.|BA.C.1301.-BA.G.1320.	BA.A.1237.|BA.C.1301.-BA.G.1320.	AnsA_LeL_ReR	IC-S-S-LR-LR-SM	IC-S-S-LR-LR-SM	SM	LR	LR	LR	SM	SM	LR	SM	SM	(5,4)	4	5.6(4.0)--pm(>>,forward)
6eri.cif1	537	BA.A.1236.|BA.C.1301.-BA.G.1320.	BA.A.1238.|BA.U.1300.-BA.G.1321.	LnL_LsR_RnR	IC-S-S-LR-LR-SM	IC-S-S-LR-LR-SM	SM	LR	LR	LR	SM	SM	LR	SM	SM	(5,4)	4						3.2(0.5)--mm(<>,outward)
6eri.cif1	537	BA.A.1237.|BA.C.1301.-BA.G.1320.	BA.A.1238.|BA.U.1300.-BA.G.1321.	AnsA_LnL_LsR_RnR	IC-S-S-LR-LR-SM	IC-S-S-LR-LR-SM	SM	LR	LR	LR	SM	SM	LR	SM	SM	(5,4)	4	3.8(3.4)--pm(>>,forward)					3.2(0.5)--mm(<>,outward)
6eri.cif1	538	BA.A.1368.|AA.G.1962.-AA.C.1972.	BA.A.1433.|AA.C.1961.-AA.G.1973.	AsA_LnsL_LsR_RnR	IC-S-S-LR-LR-SM	IC-S-S-LR-LR-SM	SM	LR	LR	LR	SM	SM	LR	SM	SM	(2,2)	4	4.3(2.4)--mm(<>,outward)				1.0(0.5)--pm(<<,backward)	3.8(1.2)--mm(<>,outward)
6eri.cif1	539	BA.A.1383.|BA.G.290.-BA.C.307.	BA.A.1384.|BA.G.291.-BA.C.306.	AnsA_LnsL_RnsR	IC-S-S-LR-LR-SM	IC-S-S-LR-LR-SM	SM	LR	LR	LR	SM	SM	LR	SM	SM	(2,2)	3	6.5(4.6)--pm(>>,forward)				3.7(2.3)--pm(>>,forward)				0.7(0.1)--pm(<<,backward)
6eri.cif1	523	BA.A.1396.|BA.A.133.-BA.A.159.	BA.A.1397.|BA.G.132.-BA.C.160.	AnsA_LnsL_RnsR	IC-IC-IC-LR-LR-SM	IC-S-S-LR-LR-SM	SM	LR	LR	LR	LC	LC	LR	LC	LC	(5,4)	7	1.9(1.4)--pm(>>,forward)				2.1(0.7)--pm(<<,backward)				2.2(1.5)--pm(>>,forward)
6eri.cif1	540	BA.A.1468.|BA.C.1354.-BA.G.1447.	BA.A.1469.|BA.C.1354.-BA.G.1447.	AnsA_LeL_ReR	HC-S-S-LR-LR-SM	HC-S-S-LR-LR-SM	SM	LR	LR	LR	SM	SM	LR	SM	SM	(2,1)	3	2.2(1.6)--pm(>>,forward)
6fz0.cif1	541	A.A.41.|A.G.2.-A.C.27.	A.A.42.|A.G.3.-A.C.26.	AnsA_LnsL_RnR	IP-S-S-LC-LC-SM	IP-S-S-LC-LC-SM	SM	LC	LC	LC	SM	SM	LC	SM	SM	(2,2)	3	4.6(2.3)--pm(>>,forward)				4.4(2.5)--pm(>>,forward)
6gsj.cif1	542	13.A.1492.|1K.G.35.-4K.C.20.	13.A.1493.|1K.U.36.-4K.A.19.	AnsA_LnsL_RnsR	IC-S-S-LR-LR-SM	IC-S-S-LR-LR-SM	SM	LR	LR	LR	SM	SM	LR	SM	SM	(2,2)	3	4.4(1.6)--pm(>>,forward)				5.4(1.8)--pm(>>,forward)				1.0(0.7)--pm(<<,backward)
6hma.cif1	543	A.A.14.|A.C.2071.-A.G.2651.	A.A.571.|A.C.2070.-A.G.2652.	LnL_RnsR	JI-S-S-LC-LC-SM	JP-S-S-LC-LC-SM	LR	LC	LC	LC	SM	SM	LC	SM	SM	(2,2)	4									3.9(2.2)--pm(>>,forward)
6hma.cif1	544	A.A.71.|A.C.57.-A.G.70.	A.A.73.|A.G.58.-A.C.69.	AsA_LnsL_RnR_RsL	HP-S-S-LC-LC-SM	HP-S-S-LC-LC-SM	SM	LC	LC	LC	SM	SM	LC	SM	SM	(2,2)	3	2.7(1.6)--pm(>>,forward)				0.6(0.2)--pm(>>,forward)			3.1(0.8)--mm(<>,outward)
6hma.cif1	545	A.A.183.|A.G.45.-A.C.479.	A.A.478.|A.A.185.-A.G.218.	AsL_LsR_RnsA	JC-S-S-LC-LC-SM	JCJP-JC-JC-SM-SM-SM	SM	SM	SM	LC	LC	LC	LC	LC	LC	(3,3)	5		1.4(0.6)--pm(>>,forward)				6.3(2.6)--pp(><,inward)	3.6(2.5)--pm(<<,backward)
6hma.cif1	546	A.A.193.|A.C.724.-A.G.843.	A.A.194.|A.C.723.-A.G.844.	AnsA_LnsL_RnsR	HC-S-S-LR-LR-SM	HC-S-S-LR-LR-SM	SM	LR	LR	LR	SM	SM	LR	SM	SM	(2,2)	3	6.5(4.6)--pm(>>,forward)				0.4(0.1)--pm(<<,backward)				2.4(0.9)--pm(>>,forward)
6hma.cif1	545	A.A.219.|A.C.186.-A.G.217.	A.A.478.|A.A.185.-A.G.218.	AnR_AsA_LnsL_RnsR	JC-JC-JC-SM-SM-SM	JCJP-JC-JC-SM-SM-SM	SM	SM	SM	SM	SM	SM	SM	SM	SM	(3,3)	5	5.5(3.5)--mm(<>,outward)				3.3(2.0)--pm(<<,backward)				7.5(4.3)--pm(>>,forward)
6hma.cif1	547	A.A.229.|A.A.455.-A.U.464.	A.A.230.|A.G.456.-A.C.463.	AnsA_LnsL_RnR	HC-S-S-LR-LR-SM	HC-S-S-LR-LR-SM	SM	LR	LR	LR	SM	SM	LR	SM	SM	(2,2)	3	4.6(3.3)--pm(>>,forward)				2.1(2.0)--pm(>>,forward)
6hma.cif1	548	A.A.274.|A.G.303.-A.C.414.	A.A.275.|A.G.304.-A.C.413.	AnsA_LnsL_RnR	JC-S-S-LC-LC-SM	JC-S-S-LC-LC-SM	SM	LC	LC	LC	SM	SM	LC	SM	SM	(2,2)	3	4.3(3.5)--pm(>>,forward)				4.5(3.1)--pm(>>,forward)
6hma.cif1	549	A.A.324.|A.A.318.-A.U.401.	A.A.325.|A.G.319.-A.C.400.	AnsA_LnsL_RnR	BC-S-S-LC-LC-SM	BC-S-S-LC-LC-SM	SM	LC	LC	LC	SM	SM	LC	SM	SM	(3,2)	3	7.3(4.8)--pm(>>,forward)				2.7(2.3)--pm(>>,forward)
6hma.cif1	549	A.A.324.|A.A.318.-A.U.401.	A.A.326.|A.G.319.-A.C.400.	LnsL_RnR	BC-S-S-LC-LC-SM	BC-S-S-LC-LC-SM	SM	LC	LC	LC	SM	SM	LC	SM	SM	(3,2)	3					2.7(2.3)--pm(>>,forward)
6hma.cif1	549	A.A.325.|A.G.319.-A.C.400.	A.A.326.|A.G.319.-A.C.400.	AnA_LeL_ReR	BC-S-S-LC-LC-SM	BC-S-S-LC-LC-SM	SM	LC	LC	LC	SM	SM	LC	SM	SM	(3,2)	3
6hma.cif1	550	A.A.337.|A.G.80.-A.C.105.	A.A.389.|A.U.79.-A.A.106.	LnL_LsR_RnR	IC-S-S-LR-LR-SM	IC-S-S-LR-LR-SM	SM	LR	LR	LR	SM	SM	LR	SM	SM	(2,2)	4						3.2(1.3)--mm(<>,outward)
6hma.cif1	551	A.A.342.|A.C.362.-A.G.366.	A.A.343.|A.U.361.-A.A.376.	AnsA_LnL_RsR	JI-HP-HP-LR-LR-SM	JI-S-S-LC-LC-SM	SM	LC	LC	LR	LC	LC	LR	LC	LC	(2,2)	4	6.9(4.8)--pm(>>,forward)								4.6(2.2)--pm(>>,forward)
6hma.cif1	552	A.A.430.|A.G.248.-A.C.256.	A.A.435.|A.C.431.-A.G.457.	AnsL	HC-S-S-LR-LR-SM	HC-HC-HP-SM-LR-LR	SM	SM	LR	LR	LR	LR	LR	LR	LR	(3,3)	4		4.4(1.4)--pm(>>,forward)
6hma.cif1	552	A.A.435.|A.C.431.-A.G.457.	A.A.437.|A.C.429.-A.A.436.	AnsR_RsA	HC-HC-HP-SM-LR-LR	HC-HC-HC-SM-SM-SM	SM	SM	SM	SM	SM	SM	LR	LR	LR	(3,3)	4			1.6(0.1)--pm(>>,forward)				6.2(4.8)--mm(<>,outward)
6hma.cif1	553	A.A.559.|A.C.624.-A.G.1297.	A.A.560.|A.C.623.-A.G.1298.	AnsA_LnL_RnsR	JCJP-S-S-LC-LC-SM	JCJP-S-S-LC-LC-SM	SM	LC	LC	LC	SM	SM	LC	SM	SM	(2,2)	3	6.0(4.4)--pm(>>,forward)								4.6(3.4)--pm(>>,forward)
6hma.cif1	554	A.A.629.|A.C.716.-A.G.854.	A.A.1292.|A.C.717.-A.G.853.	LnL_RnsR	JC-S-S-LC-LC-SM	JC-S-S-LC-LC-SM	SM	LC	LC	LC	SM	SM	LC	SM	SM	(2,2)	4									3.9(2.4)--pm(<<,backward)
6hma.cif1	555	A.A.688.|A.U.2375.-A.A.2396.	A.A.689.|A.G.2376.-A.C.2395.	AnsA_LnL_RnR_RsL	HC-S-S-LR-LR-SM	HC-S-S-LR-LR-SM	SM	LR	LR	LR	SM	SM	LR	SM	SM	(2,2)	3	6.0(3.2)--pm(>>,forward)							3.3(1.5)--mm(<>,outward)
6hma.cif1	556	A.A.730.|A.G.823.-A.C.831.	A.A.819.|A.G.822.-A.C.832.	AsA_LnsL_RnR	JC-S-S-LC-LC-SM	JC-S-S-LC-LC-SM	SM	LC	LC	LC	SM	SM	LC	SM	SM	(2,2)	4	0.7(0.2)--mm(<>,outward)				3.4(1.9)--pm(<<,backward)
6hma.cif1	557	A.A.955.|A.C.2291.-A.G.2303.	A.A.956.|A.C.2290.-A.G.2304.	AnsA_LnL_RnsR	IC-S-S-LR-LR-SM	IC-S-S-LR-LR-SM	SM	LR	LR	LR	SM	SM	LR	SM	SM	(2,2)	3	4.7(3.2)--pm(>>,forward)								2.6(1.1)--pm(>>,forward)
6hma.cif1	558	A.A.1003.|A.U.2484.-A.G.2521.	A.A.1004.|A.C.2483.-A.G.2522.	AnsA_LnsL_RnsR	HC-S-S-LR-LR-SM	HC-S-S-LR-LR-SM	SM	LR	LR	LR	SM	SM	LR	SM	SM	(3,3)	4	5.8(4.3)--pm(>>,forward)				0.7(0.2)--pm(<<,backward)				3.4(1.8)--pm(>>,forward)
6hma.cif1	558	A.A.1004.|A.C.2483.-A.G.2522.	A.A.2058.|A.G.2482.-A.C.2523.	LnsL_RnsR	HC-S-S-LR-LR-SM	HC-S-S-LR-LR-SM	LR	LR	LR	LR	SM	SM	LR	SM	SM	(3,3)	4					3.5(0.9)--pm(<<,backward)				6.9(3.7)--pm(>>,forward)
6hma.cif1	559	A.A.1024.|A.U.2053.-A.A.2064.	A.A.1025.|A.G.2054.-A.C.2063.	AnsA_LnsL_RnR_RsL	HC-S-S-LR-LR-SM	HC-S-S-LR-LR-SM	SM	LR	LR	LR	SM	SM	LR	SM	SM	(3,3)	4	6.6(4.7)--pm(>>,forward)				0.6(0.2)--pm(>>,forward)			3.1(0.8)--mm(<>,outward)
6hma.cif1	559	A.A.1024.|A.U.2053.-A.A.2064.	A.A.1177.|A.C.2052.-A.G.2065.	LnsL_RnsR	HC-S-S-LR-LR-SM	IP-S-S-LR-LR-SM	LR	LR	LR	LR	SM	SM	LR	SM	SM	(3,3)	4					2.0(0.4)--pm(<<,backward)				3.9(3.1)--pm(>>,forward)
6hma.cif1	560	A.A.1044.|A.G.1020.-A.C.1031.	A.A.1045.|A.G.1021.-A.C.1030.	AnsA_LnsL_RnR	IC-S-S-LR-LR-SM	IC-S-S-LR-LR-SM	SM	LR	LR	LR	SM	SM	LR	SM	SM	(4,4)	6	5.5(4.0)--pm(>>,forward)				2.4(1.0)--pm(>>,forward)
6hma.cif1	560	A.A.1045.|A.G.1021.-A.C.1030.	A.A.1053.|A.G.1046.-A.C.1197.	AnsL	IC-S-S-LR-LR-SM	IP-S-S-LR-LR-SM	LR	LC	LC	LR	LR	LR	LR	LR	LR	(4,4)	6		2.3(0.9)--pm(>>,forward)
6hma.cif1	560	A.A.1053.|A.G.1046.-A.C.1197.	A.A.1054.|A.G.1047.-A.C.1196.	AnsA_LnsL_RnR	IP-S-S-LR-LR-SM	IP-S-S-LR-LR-SM	SM	LR	LR	LR	SM	SM	LR	SM	SM	(4,4)	6	5.4(3.1)--pm(>>,forward)				4.4(2.1)--pm(>>,forward)
6hma.cif1	561	A.A.1072.|A.C.2491.-A.G.2513.	A.A.1073.|A.C.2492.-A.G.2512.	AnsA_LnL_RnsR	IP-S-S-LR-LR-SM	IP-S-S-LR-LR-SM	SM	LR	LR	LR	SM	SM	LR	SM	SM	(3,3)	4	1.1(0.9)--pm(>>,forward)								2.2(0.8)--pm(<<,backward)
6hma.cif1	561	A.A.1072.|A.C.2491.-A.G.2513.	A.A.1171.|A.C.2490.-A.G.2514.	LnL_RnsR	IP-S-S-LR-LR-SM	IP-S-S-LR-LR-SM	SM	LR	LR	LR	SM	SM	LR	SM	SM	(3,3)	4									3.7(2.0)--pm(>>,forward)
6hma.cif1	562	A.A.1172.|A.G.2543.-A.C.2595.	A.A.1173.|A.C.2542.-A.G.2596.	AnsA_LnL_LsR_RnsR	IP-S-S-LR-LR-SM	IP-S-S-LR-LR-SM	SM	LR	LR	LR	SM	SM	LR	SM	SM	(2,2)	3	4.1(2.7)--pm(>>,forward)					3.8(1.2)--mm(<>,outward)			0.4(0.2)--pm(>>,forward)
6hma.cif1	563	A.A.1263.|A.U.858.-A.A.1233.	A.A.1264.|A.C.857.-A.G.1234.	AnsA_LnL_RnsR	HC-S-S-LR-LR-SM	HC-S-S-LR-LR-SM	SM	LR	LR	LR	SM	SM	LR	SM	SM	(2,2)	3	6.2(4.0)--pm(>>,forward)								4.1(1.4)--pm(>>,forward)
6hma.cif1	564	A.A.1390.|A.U.738.-A.A.814.	A.A.1391.|A.C.737.-A.G.815.	AnsA_LnL_RnsR	JP-S-S-LR-LR-SM	JP-S-S-LR-LR-SM	SM	LR	LR	LR	SM	SM	LR	SM	SM	(2,2)	3	5.7(4.1)--pm(>>,forward)								3.8(3.2)--pm(>>,forward)
6hma.cif1	565	A.A.1617.|A.C.1388.-A.G.1417.	A.A.1618.|A.C.1388.-A.G.1417.	AnsA_LeL_ReR	IC-JP-JP-LR-LR-SM	IC-JP-JP-LR-LR-SM	SM	LR	LR	LR	SM	SM	LR	SM	SM	(2,1)	3	5.1(3.6)--pm(>>,forward)
6hma.cif1	566	A.A.1829.|A.U.1825.-A.A.1848.	A.A.1830.|A.C.1824.-A.G.1849.	AnsA_LnsL_RnsR	IC-S-S-LC-LC-SM	IC-S-S-LC-LC-SM	SM	LC	LC	LC	SM	SM	LC	SM	SM	(2,2)	3	5.5(4.0)--pm(>>,forward)				0.3(0.1)--pm(<<,backward)				2.5(2.4)--pm(>>,forward)
6hma.cif1	567	A.A.1836.|A.C.1400.-A.G.1405.	A.A.1837.|A.C.1399.-A.G.1406.	AnsA_LnL_RnsR	HC-S-S-LR-LR-SM	HC-S-S-LR-LR-SM	SM	LR	LR	LR	SM	SM	LR	SM	SM	(2,2)	3	6.8(4.9)--pm(>>,forward)								2.6(1.1)--pm(>>,forward)
6hma.cif1	568	A.A.1880.|A.U.2113.-A.A.2260.	A.A.1881.|A.G.2114.-A.C.2259.	AnsA_LnL_RnR_RsL	IC-S-S-LR-LR-SM	IC-S-S-LR-LR-SM	SM	LR	LR	LR	SM	SM	LR	SM	SM	(3,2)	4	4.9(3.6)--pm(>>,forward)							4.1(2.1)--mm(<>,outward)
6hma.cif1	568	A.A.1880.|A.U.2113.-A.A.2260.	A.A.1916.|A.U.2113.-A.A.2260.	LeL_ReR	IC-S-S-LR-LR-SM	IC-S-S-LR-LR-SM	SM	LR	LR	LR	SM	SM	LR	SM	SM	(3,2)	4
6hma.cif1	568	A.A.1881.|A.G.2114.-A.C.2259.	A.A.1916.|A.U.2113.-A.A.2260.	LnL_LsR_RnR	IC-S-S-LR-LR-SM	IC-S-S-LR-LR-SM	SM	LR	LR	LR	SM	SM	LR	SM	SM	(3,2)	4						4.1(2.1)--mm(<>,outward)
6hma.cif1	569	A.A.1927.|A.G.1820.-A.C.1853.	A.A.1997.|A.G.1819.-A.U.1854.	AsA_LnsL_RnsR	BC-S-S-LR-LR-SM	JC-S-S-LR-LR-SM	LR	LR	LR	LR	SM	SM	LR	SM	SM	(3,3)	6	4.0(3.5)--mp(<<,backward)				3.9(2.4)--pm(<<,backward)				0.6(0.2)--pm(>>,forward)
6hma.cif1	570	A.A.1954.|A.C.1864.-A.G.1930.	A.A.1955.|A.C.1863.-A.G.1931.	AnsA_LnL_RnsR	JC-S-S-LC-LC-SM	JC-S-S-LC-LC-SM	SM	LC	LC	LC	SM	SM	LC	SM	SM	(2,2)	3	6.4(4.6)--pm(>>,forward)								2.7(1.2)--pm(>>,forward)
6hma.cif1	571	A.A.1979.|A.G.2575.-A.C.2587.	A.A.1980.|A.G.2576.-A.C.2586.	AnsA_LnsL_RnR	HC-S-S-LR-LR-SM	HC-S-S-LR-LR-SM	SM	LR	LR	LR	SM	SM	LR	SM	SM	(2,2)	3	7.2(5.4)--pm(>>,forward)				4.0(2.3)--pm(>>,forward)
6hma.cif1	569	A.A.1996.|A.C.1860.-A.G.1999.	A.A.1997.|A.G.1819.-A.U.1854.	AnA_RsA	JC-S-S-LC-LC-SM	JC-S-S-LR-LR-SM	SM	LR	LR	LC	LR	LR	LC	LR	LR	(3,3)	6							2.9(1.1)--mm(<>,outward)
6hma.cif1	572	A.A.2300.|A.G.997.-A.C.1008.	A.A.2301.|A.G.998.-A.U.1007.	AnsA_LnsL_RnR	HC-S-S-LR-LR-SM	HC-S-S-LR-LR-SM	SM	LR	LR	LR	SM	SM	LR	SM	SM	(2,2)	3	2.2(1.6)--pm(>>,forward)				1.8(0.4)--pm(>>,forward)
6hma.cif1	573	A.A.2354.|A.C.2288.-A.G.2306.	A.A.2415.|A.C.2287.-A.G.2307.	AsA_LnL_RnsR	HP-S-S-LR-LR-SM	JIJP-S-S-LC-LC-SM	LR	LR	LR	LC	SM	SM	LC	SM	SM	(2,2)	4	2.1(0.6)--mm(<>,outward)								3.8(1.7)--pm(>>,forward)
6hma.cif1	574	A.A.2591.|A.C.2548.-A.G.2571.	A.A.2592.|A.C.2547.-A.G.2572.	AnsA_LnL_RnsR	JC-S-S-LC-LC-SM	JC-S-S-LC-LC-SM	SM	LC	LC	LC	SM	SM	LC	SM	SM	(2,2)	3	7.2(5.2)--pm(>>,forward)								4.6(3.2)--pm(>>,forward)
6hma.cif1	575	A.A.2767.|A.G.2550.-A.C.2567.	A.A.2768.|A.G.2551.-A.C.2566.	AnsA_LnsL_RnR	IC-S-S-LR-LR-SM	IC-S-S-LR-LR-SM	SM	LR	LR	LR	SM	SM	LR	SM	SM	(3,2)	4	4.2(3.2)--pm(>>,forward)				3.2(1.6)--pm(>>,forward)
6hma.cif1	575	A.A.2767.|A.G.2550.-A.C.2567.	A.A.2791.|A.G.2550.-A.C.2567.	AsA_LeL_ReR	IC-S-S-LR-LR-SM	IC-S-S-LR-LR-SM	SM	LR	LR	LR	SM	SM	LR	SM	SM	(3,2)	4	6.2(4.0)--mm(<>,outward)
6hma.cif1	575	A.A.2768.|A.G.2551.-A.C.2566.	A.A.2791.|A.G.2550.-A.C.2567.	LnsL_RnR	IC-S-S-LR-LR-SM	IC-S-S-LR-LR-SM	SM	LR	LR	LR	SM	SM	LR	SM	SM	(3,2)	4					3.2(1.6)--pm(<<,backward)
6hma.cif1	576	A.A.2829.|A.G.2657.-A.C.2815.	A.A.2830.|A.G.2658.-A.C.2814.	AnsA_LnsL_RnR	JI-S-S-LC-LC-SM	JI-S-S-LC-LC-SM	SM	LC	LC	LC	SM	SM	LC	SM	SM	(3,2)	4	5.4(3.9)--pm(>>,forward)				3.7(2.4)--pm(>>,forward)
6hma.cif1	576	A.A.2829.|A.G.2657.-A.C.2815.	A.A.2911.|A.G.2657.-A.C.2815.	AsA_LeL_ReR	JI-S-S-LC-LC-SM	JI-S-S-LC-LC-SM	SM	LC	LC	LC	SM	SM	LC	SM	SM	(3,2)	4	5.7(2.9)--mm(<>,outward)
6hma.cif1	576	A.A.2830.|A.G.2658.-A.C.2814.	A.A.2911.|A.G.2657.-A.C.2815.	LnsL_RnR	JI-S-S-LC-LC-SM	JI-S-S-LC-LC-SM	SM	LC	LC	LC	SM	SM	LC	SM	SM	(3,2)	4					3.7(2.4)--pm(<<,backward)
6hma.cif1	577	B.A.51.|B.C.29.-B.G.49.	B.A.55.|B.C.28.-B.G.52.	AnsR_LnsL	BC-S-S-LC-LC-SM	IC-S-S-LC-LC-SM	LR	LC	LC	LR	LR	LR	LR	LR	LR	(3,3)	6			4.6(1.9)--pm(>>,forward)		4.7(1.0)--pm(<<,backward)
6hma.cif1	577	B.A.55.|B.A.27.-B.U.53.	B.A.55.|B.C.28.-B.G.52.	AeA_LnsL_RnsR	IC-S-S-LC-LC-SM	IC-S-S-LC-LC-SM	SM	LC	LC	LC	SM	SM	LC	SM	SM	(3,3)	6					4.9(3.4)--pm(>>,forward)				5.8(2.9)--pm(<<,backward)
6hma.cif1	577	B.A.55.|B.A.27.-B.U.53.	B.A.56.|B.A.27.-B.U.53.	AnsA_LeL_ReR	IC-S-S-LC-LC-SM	IC-S-S-LC-LC-SM	SM	LC	LC	LC	SM	SM	LC	SM	SM	(3,3)	6	2.5(2.2)--pm(>>,forward)
6hma.cif1	577	B.A.55.|B.C.28.-B.G.52.	B.A.56.|B.A.27.-B.U.53.	AnsA_LnsL_RnsR	IC-S-S-LC-LC-SM	IC-S-S-LC-LC-SM	SM	LC	LC	LC	SM	SM	LC	SM	SM	(3,3)	6	2.5(2.2)--pm(>>,forward)				4.9(3.4)--pm(<<,backward)				5.8(2.9)--pm(>>,forward)
6of1.cif1	578	1a.A.1492.|1v.U.20.-1w.A.35.	1a.A.1493.|1v.G.19.-1w.C.36.	AnsA_LnsL_RnsR	IC-S-S-LR-LR-SM	IC-S-S-LR-LR-SM	SM	LR	LR	LR	SM	SM	LR	SM	SM	(2,2)	3	5.3(2.8)--pm(>>,forward)				1.7(0.3)--pm(<<,backward)				5.2(1.8)--pm(>>,forward)
6qzp.cif1	579	L5.A.25.|L5.C.339.-L8.G.33.	L5.A.338.|L5.C.26.-L5.G.57.	AnsL_LnsA	JI-JP-JI-LR-SM-LR	JP-JI-JI-LR-LR-SM	LR	SM	SM	SM	LR	LR	LR	SM	SM	(2,2)	4		5.8(4.3)--pm(>>,forward)		5.7(4.3)--pm(<<,backward)
6qzp.cif1	580	L5.A.33.|L5.G.1526.-L5.C.1648.	L5.A.34.|L5.G.1526.-L5.C.1648.	AnsA_LeL_ReR	HC-S-S-LR-LR-SM	HC-S-S-LR-LR-SM	SM	LR	LR	LR	SM	SM	LR	SM	SM	(2,1)	3	6.5(4.6)--pm(>>,forward)
6qzp.cif1	581	L5.A.42.|L5.C.3924.-L5.G.4187.	L5.A.4380.|L5.A.3923.-L5.U.4188.	LnsL_RnsR	HC-S-S-LR-LR-SM	JI-S-S-LC-LC-SM	LR	LR	LR	LC	SM	SM	LC	SM	SM	(2,2)	4					2.9(1.4)--pm(<<,backward)				7.3(3.9)--pm(>>,forward)
6qzp.cif1	582	L5.A.69.|L5.U.313.-L5.A.324.	L5.A.70.|L5.G.314.-L5.C.323.	AnsA_LnsL_RnR_RsL	HC-S-S-LR-LR-SM	HC-S-S-LR-LR-SM	SM	LR	LR	LR	SM	SM	LR	SM	SM	(2,2)	3	5.3(3.8)--pm(>>,forward)				0.5(0.1)--pm(>>,forward)			2.3(0.8)--mm(<>,outward)
6qzp.cif1	583	L5.A.197.|L5.C.222.-L5.G.226.	L5.A.198.|L5.C.221.-L5.G.236.	AnsA_LnL_RsR	JI-HP-HP-LR-LR-SM	JI-S-S-LC-LC-SM	SM	LC	LC	LR	LC	LC	LR	LC	LC	(2,2)	4	7.7(5.5)--pm(>>,forward)								4.9(1.9)--pm(>>,forward)
6qzp.cif1	584	L5.A.295.|L5.U.4353.-L5.U.4361.	L5.A.3727.|L5.A.317.-L5.U.4360.	RnsR	HC-HPJP-HP-LR-LR-SM	HC-S-S-LR-LR-SM	LR	LR	LR	LR	LC	LC	LR	LC	LC	(3,3)	6									3.9(1.9)--pm(<<,backward)
6qzp.cif1	584	L5.A.295.|L5.U.4353.-L5.U.4361.	L5.A.3728.|L5.A.317.-L5.U.4360.	RnsR	HC-HPJP-HP-LR-LR-SM	HC-S-S-LR-LR-SM	LR	LR	LR	LR	LC	LC	LR	LC	LC	(3,3)	6									3.9(1.9)--pm(<<,backward)
6qzp.cif1	585	L5.A.371.|L5.U.1531.-L5.A.1643.	L5.A.372.|L5.G.1530.-L5.C.1644.	AnsA_LnsL_RnsR	HC-S-S-LR-LR-SM	HC-S-S-LR-LR-SM	SM	LR	LR	LR	SM	SM	LR	SM	SM	(2,2)	3	6.0(3.9)--pm(>>,forward)				5.8(2.9)--pm(<<,backward)				5.5(4.3)--pm(>>,forward)
6qzp.cif1	586	L5.A.419.|L5.C.1332.-L5.G.2354.	L5.A.420.|L5.C.1331.-L5.G.2355.	AnsA_LnL_RnsR	JCJP-S-S-LC-LC-SM	JCJP-S-S-LC-LC-SM	SM	LC	LC	LC	SM	SM	LC	SM	SM	(2,2)	3	6.5(4.7)--pm(>>,forward)								4.5(3.1)--pm(>>,forward)
6qzp.cif1	587	L5.A.1337.|L5.C.1519.-L5.G.1658.	L5.A.2349.|L5.C.1520.-L5.G.1657.	AsA_LnL_RnsR	JC-S-S-LC-LC-SM	JC-S-S-LC-LC-SM	SM	LC	LC	LC	SM	SM	LC	SM	SM	(3,3)	7	1.7(0.5)--mm(<>,outward)								4.4(3.2)--pm(<<,backward)
6qzp.cif1	588	L5.A.1391.|L5.A.4348.-L5.G.4364.	L5.A.1391.|L5.C.4350.-L5.G.4364.	AeA_LsL_ReR	HC-BCJP-S-LR-LR-LC	HC-S-S-LR-LR-SM	SM	LR	LR	LR	LC	LC	LR	SM	SM	(1,2)	4					5.5(3.9)--pm(>>,forward)
6qzp.cif1	589	L5.A.1533.|L5.G.1627.-L5.C.1635.	L5.A.1623.|L5.G.1626.-L5.U.1636.	AsA_LnsL_RnsR	JC-S-S-LC-LC-SM	JC-S-S-LC-LC-SM	SM	LC	LC	LC	SM	SM	LC	SM	SM	(2,2)	4	0.5(0.2)--mm(<>,outward)				4.1(2.5)--pm(<<,backward)				1.0(0.3)--pm(>>,forward)
6qzp.cif1	590	L5.A.1563.|S2.C.676.-S2.G.1029.	L5.A.1564.|S2.C.676.-S2.G.1029.	AnsA_LeL_ReR	HC-S-S-LR-LR-SM	HC-S-S-LR-LR-SM	SM	LR	LR	LR	SM	SM	LR	SM	SM	(2,1)	3	6.2(3.8)--pm(>>,forward)
6qzp.cif1	591	L5.A.1742.|L5.A.1738.-L5.U.1790.	L5.A.1742.|L5.G.1739.-L5.C.1789.	AeA_LnsL_RnsR	IC-S-S-LC-LC-SM	IC-S-S-LC-LC-SM	SM	LC	LC	LC	SM	SM	LC	SM	SM	(2,2)	3					2.5(2.4)--pm(>>,forward)				2.1(0.7)--pm(<<,backward)
6qzp.cif1	591	L5.A.1742.|L5.A.1738.-L5.U.1790.	L5.A.1743.|L5.G.1739.-L5.C.1789.	AnA_LnsL_RnsR	IC-S-S-LC-LC-SM	IC-S-S-LC-LC-SM	SM	LC	LC	LC	SM	SM	LC	SM	SM	(2,2)	3					2.5(2.4)--pm(>>,forward)				2.1(0.7)--pm(<<,backward)
6qzp.cif1	591	L5.A.1742.|L5.G.1739.-L5.C.1789.	L5.A.1743.|L5.G.1739.-L5.C.1789.	AnA_LeL_ReR	IC-S-S-LC-LC-SM	IC-S-S-LC-LC-SM	SM	LC	LC	LC	SM	SM	LC	SM	SM	(2,2)	3
6qzp.cif1	592	L5.A.1787.|L5.U.4210.-L5.G.4222.	L5.A.1788.|L5.G.4209.-L5.C.4223.	AnsA_LnsL_RnsR	IC-S-S-LR-LR-SM	IC-S-S-LR-LR-SM	SM	LR	LR	LR	SM	SM	LR	SM	SM	(2,2)	3	6.3(4.7)--pm(>>,forward)				7.0(3.0)--pm(<<,backward)				7.4(4.6)--pm(>>,forward)
6qzp.cif1	593	L5.A.1867.|L5.C.4402.-L5.A.4441.	L5.A.1868.|L5.C.4402.-L5.A.4441.	AnsA_LeL_ReR	HC-JC-JC-LR-LR-SM	HC-JC-JC-LR-LR-SM	SM	LR	LR	LR	SM	SM	LR	SM	SM	(2,1)	3	5.4(3.9)--pm(>>,forward)
6qzp.cif1	594	L5.A.1891.|L5.G.1855.-L5.C.1879.	L5.A.1892.|L5.C.1856.-L5.G.1878.	AnsA_LnsL_RnsR	HC-S-S-LR-LR-SM	HC-S-S-LR-LR-SM	SM	LR	LR	LR	SM	SM	LR	SM	SM	(2,2)	3	6.4(3.8)--pm(>>,forward)				7.1(4.4)--pm(>>,forward)				6.1(2.9)--pm(<<,backward)
6qzp.cif1	595	L5.A.1907.|L5.G.1885.-L5.C.1894.	L5.A.1908.|L5.G.1885.-L5.C.1894.	AnsA_LeL_ReR	IC-S-S-LR-LR-SM	IC-S-S-LR-LR-SM	SM	LR	LR	LR	SM	SM	LR	SM	SM	(3,2)	4	6.6(4.9)--pm(>>,forward)
6qzp.cif1	595	L5.A.1907.|L5.G.1885.-L5.C.1894.	L5.A.2069.|L5.C.1884.-L5.G.1895.	AsA_LnL_LsR_RnR	IC-S-S-LR-LR-SM	IC-S-S-LR-LR-SM	SM	LR	LR	LR	SM	SM	LR	SM	SM	(3,2)	4	3.8(2.2)--mm(<>,outward)					4.4(1.9)--mm(<>,outward)
6qzp.cif1	595	L5.A.1908.|L5.G.1885.-L5.C.1894.	L5.A.2069.|L5.C.1884.-L5.G.1895.	LnL_LsR_RnR	IC-S-S-LR-LR-SM	IC-S-S-LR-LR-SM	SM	LR	LR	LR	SM	SM	LR	SM	SM	(3,2)	4						4.4(1.9)--mm(<>,outward)
6qzp.cif1	596	L5.A.1942.|L5.G.4410.-L5.C.4432.	L5.A.1943.|L5.G.4411.-L5.U.4431.	AnsA_LnsL_RnR	IP-S-S-LR-LR-SM	IP-S-S-LR-LR-SM	SM	LR	LR	LR	SM	SM	LR	SM	SM	(3,4)	4	1.9(1.6)--pm(>>,forward)				3.4(1.9)--pm(>>,forward)
6qzp.cif1	596	L5.A.1942.|L5.G.4410.-L5.C.4432.	L5.A.2041.|L5.C.4409.-L5.G.4433.	LnL_LsR_RnR	IP-S-S-LR-LR-SM	IP-S-S-LR-LR-SM	SM	LR	LR	LR	SM	SM	LR	SM	SM	(3,4)	4						5.4(2.5)--mm(<>,outward)
6qzp.cif1	596	L5.A.2041.|L5.G.4408.-L5.C.4434.	L5.A.2041.|L5.C.4409.-L5.G.4433.	AeA_LnsL_RnsR	IP-S-S-LR-LR-SM	IP-S-S-LR-LR-SM	SM	LR	LR	LR	SM	SM	LR	SM	SM	(3,4)	4					6.2(3.2)--pm(>>,forward)				6.8(3.7)--pm(<<,backward)
6qzp.cif1	597	L5.A.2042.|L5.C.4462.-L5.G.4514.	L5.A.2043.|L5.C.4461.-L5.G.4515.	AnsA_LnL_RnsR	IP-S-S-LR-LR-SM	IP-S-S-LR-LR-SM	SM	LR	LR	LR	SM	SM	LR	SM	SM	(2,2)	3	5.5(3.3)--pm(>>,forward)								4.2(2.2)--pm(>>,forward)
6qzp.cif1	587	L5.A.2349.|L5.C.1520.-L5.G.1657.	L5.A.3906.|L5.C.1521.-L5.U.1656.	LnsL_RnsR	JC-S-S-LC-LC-SM	JCJP-IC-IC-LR-LR-SM	LR	LR	LR	LR	LC	LC	LR	LC	LC	(3,3)	7					1.2(0.3)--pm(>>,forward)				1.0(0.6)--pm(<<,backward)
6qzp.cif1	598	L5.A.2581.|L5.C.2654.-L5.G.2680.	L5.A.2582.|L5.C.2653.-L5.G.2681.	AnsA_LnL_RnsR	HC-S-S-LR-LR-SM	HC-S-S-LR-LR-SM	SM	LR	LR	LR	SM	SM	LR	SM	SM	(2,2)	3	7.2(5.3)--pm(>>,forward)								3.0(1.2)--pm(>>,forward)
6qzp.cif1	599	L5.A.2743.|L5.C.2446.-L5.G.2514.	L5.A.2744.|L5.C.2446.-L5.G.2514.	AnsA_LeL_ReR	ICJP-S-S-LR-LR-SM	ICJP-S-S-LR-LR-SM	SM	LR	LR	LR	SM	SM	LR	SM	SM	(4,2)	3	6.0(4.4)--pm(>>,forward)
6qzp.cif1	599	L5.A.2743.|L5.C.2446.-L5.G.2514.	L5.A.2745.|L5.C.2446.-L5.G.2514.	LeL_ReR	ICJP-S-S-LR-LR-SM	ICJP-S-S-LR-LR-SM	SM	LR	LR	LR	SM	SM	LR	SM	SM	(4,2)	3
6qzp.cif1	599	L5.A.2743.|L5.C.2446.-L5.G.2514.	L5.A.2746.|L5.C.2445.-L5.G.2515.	LnsL_RnsR	ICJP-S-S-LR-LR-SM	ICJP-S-S-LR-LR-SM	SM	LR	LR	LR	SM	SM	LR	SM	SM	(4,2)	3					0.3(0.1)--pm(<<,backward)				2.6(1.1)--pm(>>,forward)
6qzp.cif1	599	L5.A.2744.|L5.C.2446.-L5.G.2514.	L5.A.2745.|L5.C.2446.-L5.G.2514.	AnsA_LeL_ReR	ICJP-S-S-LR-LR-SM	ICJP-S-S-LR-LR-SM	SM	LR	LR	LR	SM	SM	LR	SM	SM	(4,2)	3	6.2(4.5)--pm(>>,forward)
6qzp.cif1	599	L5.A.2744.|L5.C.2446.-L5.G.2514.	L5.A.2746.|L5.C.2445.-L5.G.2515.	LnsL_RnsR	ICJP-S-S-LR-LR-SM	ICJP-S-S-LR-LR-SM	SM	LR	LR	LR	SM	SM	LR	SM	SM	(4,2)	3					0.3(0.1)--pm(<<,backward)				2.6(1.1)--pm(>>,forward)
6qzp.cif1	599	L5.A.2745.|L5.C.2446.-L5.G.2514.	L5.A.2746.|L5.C.2445.-L5.G.2515.	AnsA_LnsL_RnsR	ICJP-S-S-LR-LR-SM	ICJP-S-S-LR-LR-SM	SM	LR	LR	LR	SM	SM	LR	SM	SM	(4,2)	3	2.0(1.7)--pm(>>,forward)				0.3(0.1)--pm(<<,backward)				2.6(1.1)--pm(>>,forward)
6qzp.cif1	600	L5.A.3647.|L5.G.4534.-L5.U.4552.	L5.A2M.3785.|L5.A.4535.-L5.U.4551.	LnsL_RnR	HC-S-S-LR-LR-SM	JC-S-S-LR-LR-SM	LR	LR	LR	LR	SM	SM	LR	SM	SM	(2,2)	4					4.3(1.5)--pm(>>,forward)
6qzp.cif1	601	L5.A.3717.|L5.U.3932.-L5.A.4178.	L5.A2M.3718.|L5.G.3933.-L5.C.4177.	AnsA_LnL_RnR_RsL	IC-S-S-LR-LR-SM	IC-S-S-LR-LR-SM	SM	LR	LR	LR	SM	SM	LR	SM	SM	(4,3)	4	5.5(4.0)--pm(>>,forward)							1.8(1.0)--mm(<>,outward)
6qzp.cif1	601	L5.A.3717.|L5.U.3932.-L5.A.4178.	L5.A.3736.|L5.U.3932.-L5.A.4178.	AsA_LeL_ReR	IC-S-S-LR-LR-SM	IC-S-S-LR-LR-SM	SM	LR	LR	LR	SM	SM	LR	SM	SM	(4,3)	4	3.7(1.2)--mm(<>,outward)
6qzp.cif1	601	L5.A.3717.|L5.U.3932.-L5.A.4178.	L5.A.3737.|L5.C.3931.-L5.G.4179.	LnsL_RnsR	IC-S-S-LR-LR-SM	IC-S-S-LR-LR-SM	SM	LR	LR	LR	SM	SM	LR	SM	SM	(4,3)	4					1.6(0.6)--pm(<<,backward)				1.3(1.2)--pm(>>,forward)
6qzp.cif1	601	L5.A2M.3718.|L5.G.3933.-L5.C.4177.	L5.A.3736.|L5.U.3932.-L5.A.4178.	LnL_LsR_RnR	IC-S-S-LR-LR-SM	IC-S-S-LR-LR-SM	SM	LR	LR	LR	SM	SM	LR	SM	SM	(4,3)	4						1.8(1.0)--mm(<>,outward)
6qzp.cif1	584	L5.A.3727.|L5.A.317.-L5.U.4360.	L5.A.3727.|L5.A.318.-L5.U.4359.	AeA_LnsL_RnR	HC-S-S-LR-LR-SM	HC-S-S-LR-LR-SM	SM	LR	LR	LR	SM	SM	LR	SM	SM	(3,3)	6					2.3(2.1)--pm(>>,forward)
6qzp.cif1	584	L5.A.3727.|L5.A.317.-L5.U.4360.	L5.A.3728.|L5.A.317.-L5.U.4360.	AnsA_LeL_ReR	HC-S-S-LR-LR-SM	HC-S-S-LR-LR-SM	SM	LR	LR	LR	SM	SM	LR	SM	SM	(3,3)	6	4.9(3.5)--pm(>>,forward)
6qzp.cif1	584	L5.A.3727.|L5.A.318.-L5.U.4359.	L5.A.3728.|L5.A.317.-L5.U.4360.	AnsA_LnsL_RnR	HC-S-S-LR-LR-SM	HC-S-S-LR-LR-SM	SM	LR	LR	LR	SM	SM	LR	SM	SM	(3,3)	6	4.9(3.5)--pm(>>,forward)				2.3(2.1)--pm(<<,backward)
6qzp.cif1	601	L5.A.3736.|L5.U.3932.-L5.A.4178.	L5.A.3737.|L5.C.3931.-L5.G.4179.	AnsA_LnsL_RnsR	IC-S-S-LR-LR-SM	IC-S-S-LR-LR-SM	SM	LR	LR	LR	SM	SM	LR	SM	SM	(4,3)	4	5.9(4.3)--pm(>>,forward)				1.6(0.6)--pm(<<,backward)				1.3(1.2)--pm(>>,forward)
6qzp.cif1	602	L5.A.3747.|L5.C.3655.-L5.G.3689.	L5.A.3817.|L5.G.3654.-L5.U.3690.	AsA_LnsL_RnsR	BC-S-S-LR-LR-SM	JC-S-S-LR-LR-SM	LR	LR	LR	LR	SM	SM	LR	SM	SM	(3,3)	6	3.0(2.7)--mp(<<,backward)				7.4(4.0)--pm(<<,backward)				7.2(4.3)--pm(>>,forward)
6qzp.cif1	602	L5.A.3747.|L5.C.3655.-L5.G.3689.	L5.A.3817.|L5.C.3655.-L5.G.3689.	AsA_LeL_ReR	BC-S-S-LR-LR-SM	JC-S-S-LR-LR-SM	LR	LR	LR	LR	SM	SM	LR	SM	SM	(3,3)	6	3.0(2.7)--mp(<<,backward)
6qzp.cif1	603	L5.A.3799.|L5.OMG.4494.-L5.C.4506.	L5.A.3800.|L5.G.4495.-L5.C.4505.	AnsA_LnsL_RnR	HC-S-S-LR-LR-SM	HC-S-S-LR-LR-SM	SM	LR	LR	LR	SM	SM	LR	SM	SM	(2,2)	3	7.1(5.3)--pm(>>,forward)				4.0(1.8)--pm(>>,forward)
6qzp.cif1	602	L5.A.3816.|L5.C.3696.-L5.G.3819.	L5.A.3817.|L5.G.3654.-L5.U.3690.	AnA_RsA	JC-S-S-LC-LC-SM	JC-S-S-LR-LR-SM	SM	LR	LR	LC	LR	LR	LC	LR	LR	(3,3)	6							1.6(0.5)--mm(<>,outward)
6qzp.cif1	602	L5.A.3816.|L5.C.3696.-L5.G.3819.	L5.A.3817.|L5.C.3655.-L5.G.3689.	AnA_RsA	JC-S-S-LC-LC-SM	JC-S-S-LR-LR-SM	SM	LR	LR	LC	LR	LR	LC	LR	LR	(3,3)	6							1.6(0.5)--mm(<>,outward)
6qzp.cif1	602	L5.A.3817.|L5.G.3654.-L5.U.3690.	L5.A.3817.|L5.C.3655.-L5.G.3689.	AeA_LnsL_RnsR	JC-S-S-LR-LR-SM	JC-S-S-LR-LR-SM	SM	LR	LR	LR	SM	SM	LR	SM	SM	(3,3)	6					7.4(4.0)--pm(>>,forward)				7.2(4.3)--pm(<<,backward)
6qzp.cif1	604	L5.A.3947.|L5.A.3945.-L5.U.4068.	L5.A.3947.|L5.G.3946.-L5.U.4067.	AeA_AnL_LnsL_RnR	HC-S-S-LC-LC-SM	HC-HC-HC-SM-SM-SM	SM	SM	SM	LC	LC	LC	LC	LC	LC	(1,2)	3					5.6(3.0)--pm(>>,forward)
6qzp.cif1	605	L5.A.4219.|L5.U.1862.-L5.G.1872.	L5.6MZ.4220.|L5.U.1863.-L5.A2M.1871.	AnsA_LnL_RnsR	HC-S-S-LR-LR-SM	HC-S-S-LR-LR-SM	SM	LR	LR	LR	SM	SM	LR	SM	SM	(2,2)	3	2.2(1.1)--pm(>>,forward)								3.7(2.9)--pm(<<,backward)
6qzp.cif1	606	L5.A.4510.|L5.C.4466.-L5.G.4491.	L5.A.4510.|L5.A.4467.-L5.C.4490.	AeA_LnL_RnR_RsL	JC-JC-JC-SM-SM-SM	JC-JC-JC-SM-SM-SM	SM	SM	SM	SM	SM	SM	SM	SM	SM	(2,2)	3								1.4(0.6)--mm(<>,outward)
6qzp.cif1	606	L5.A.4510.|L5.C.4466.-L5.G.4491.	L5.A.4511.|L5.C.4466.-L5.G.4491.	AnsA_LeL_ReR	JC-JC-JC-SM-SM-SM	JC-JC-JC-SM-SM-SM	SM	SM	SM	SM	SM	SM	SM	SM	SM	(2,2)	3	6.8(4.8)--pm(>>,forward)
6qzp.cif1	606	L5.A.4510.|L5.A.4467.-L5.C.4490.	L5.A.4511.|L5.C.4466.-L5.G.4491.	AnsA_LnL_LsR_RnR	JC-JC-JC-SM-SM-SM	JC-JC-JC-SM-SM-SM	SM	SM	SM	SM	SM	SM	SM	SM	SM	(2,2)	3	6.8(4.8)--pm(>>,forward)					1.4(0.6)--mm(<>,outward)
6qzp.cif1	607	L5.A.4518.|L5.U.4399.-L5.U.4445.	L5.A.4518.|L5.U.4399.-L5.PSU.4450.	AeA_LeL	IC-JC-JC-LR-LR-SM	IC-JC-JC-LR-LR-SM	SM	LR	LR	LR	SM	SM	LR	SM	SM	(1,2)	3
6qzp.cif1	608	L5.A.4684.|L5.G.4470.-L5.C.4485.	L5.A.4707.|L5.U.4469.-L5.C.4486.	LnsL_RnR	IC-S-S-LR-LR-SM	IC-JC-JC-LR-LR-SM	SM	LR	LR	LR	LC	LC	LR	LC	LC	(2,2)	6					0.7(0.3)--pm(<<,backward)
6qzp.cif1	609	L7.A.22.|L7.G.1.-L7.C.118.	L7.A.23.|L7.G.1.-L7.C.118.	AnsA_LeL_ReR	IC-S-S-LR-LR-SM	IC-S-S-LR-LR-SM	SM	LR	LR	LR	SM	SM	LR	SM	SM	(2,1)	3	5.2(3.8)--pm(>>,forward)
6qzp.cif1	610	L7.A.50.|L7.C.29.-L7.G.48.	L7.A.54.|L7.C.28.-L7.G.51.	AnsR_LnsL	BC-S-S-LC-LC-SM	IC-S-S-LC-LC-SM	LR	LC	LC	LR	LR	LR	LR	LR	LR	(3,3)	6			4.7(1.7)--pm(>>,forward)		3.3(0.3)--pm(<<,backward)
6qzp.cif1	610	L7.A.54.|L7.G.27.-L7.C.52.	L7.A.54.|L7.C.28.-L7.G.51.	AeA_LnsL_RnsR	IC-S-S-LC-LC-SM	IC-S-S-LC-LC-SM	SM	LC	LC	LC	SM	SM	LC	SM	SM	(3,3)	6					6.2(3.7)--pm(>>,forward)				5.2(3.2)--pm(<<,backward)
6qzp.cif1	610	L7.A.54.|L7.G.27.-L7.C.52.	L7.A.55.|L7.G.27.-L7.C.52.	AnsA_LeL_ReR	IC-S-S-LC-LC-SM	IC-S-S-LC-LC-SM	SM	LC	LC	LC	SM	SM	LC	SM	SM	(3,3)	6	4.1(3.0)--pm(>>,forward)
6qzp.cif1	610	L7.A.54.|L7.C.28.-L7.G.51.	L7.A.55.|L7.G.27.-L7.C.52.	AnsA_LnsL_RnsR	IC-S-S-LC-LC-SM	IC-S-S-LC-LC-SM	SM	LC	LC	LC	SM	SM	LC	SM	SM	(3,3)	6	4.1(3.0)--pm(>>,forward)				6.2(3.7)--pm(<<,backward)				5.2(3.2)--pm(>>,forward)
6qzp.cif1	611	L8.A.59.|L8.C.45.-L8.G.58.	L8.A.61.|L8.G.46.-L8.C.57.	AsA_LnsL_RnR_RsL	HP-S-S-LC-LC-SM	HP-S-S-LC-LC-SM	SM	LC	LC	LC	SM	SM	LC	SM	SM	(2,2)	3	1.5(0.6)--pm(>>,forward)				1.1(0.1)--pm(>>,forward)			2.5(0.4)--mm(<>,outward)
6qzp.cif1	612	S2.A.46.|S2.U.97.-S2.A.433.	S2.A.99.|S2.U.97.-S2.A.433.	AsA_LeL_ReR	JC-S-S-LR-LR-SM	JC-S-S-LC-LC-SM	LR	LR	LR	LC	SM	SM	LC	SM	SM	(3,2)	5	3.7(0.9)--pm(>>,forward)
6qzp.cif1	612	S2.A.46.|S2.U.97.-S2.A.433.	S2.A.473.|S2.C.96.-S2.G.434.	AsA_LnsL_RnsR	JC-S-S-LR-LR-SM	JC-S-S-LC-LC-SM	LR	LR	LR	LC	SM	SM	LC	SM	SM	(3,2)	5	7.0(5.4)--mm(<>,outward)				5.0(2.0)--pm(<<,backward)				3.4(2.8)--pm(>>,forward)
6qzp.cif1	613	S2.A.60.|S2.G.316.-S2.C.334.	S2.A.61.|S2.C.315.-S2.G.335.	AnsA_LnL_LsR_RnR	IC-S-S-LR-LR-SM	IC-S-S-LR-LR-SM	SM	LR	LR	LR	SM	SM	LR	SM	SM	(2,2)	3	7.0(5.0)--pm(>>,forward)					4.6(1.7)--mm(<>,outward)
6qzp.cif1	612	S2.A.99.|S2.U.97.-S2.A.433.	S2.A.473.|S2.C.96.-S2.G.434.	LnsL_RnsR	JC-S-S-LC-LC-SM	JC-S-S-LC-LC-SM	LR	LC	LC	LC	SM	SM	LC	SM	SM	(3,2)	5					5.0(2.0)--pm(<<,backward)				3.4(2.8)--pm(>>,forward)
6qzp.cif1	614	S2.A.149.|S2.U.63.-S2.A.85.	S2.A.170.|S2.U.63.-S2.A.85.	AsA_LeL_ReR	IC-S-S-LR-LR-SM	IC-S-S-LR-LR-SM	SM	LR	LR	LR	SM	SM	LR	SM	SM	(3,2)	4	3.2(0.5)--mm(<>,outward)
6qzp.cif1	614	S2.A.149.|S2.U.63.-S2.A.85.	S2.A.171.|S2.G.62.-S2.C.86.	LnsL_RnsR	IC-S-S-LR-LR-SM	IC-S-S-LR-LR-SM	SM	LR	LR	LR	SM	SM	LR	SM	SM	(3,2)	4					5.2(2.3)--pm(<<,backward)				2.8(1.9)--pm(>>,forward)
6qzp.cif1	615	S2.A.158.|S2.C.462.-S2.G.467.	S2.A2M.159.|S2.C.462.-S2.G.467.	AnsA_LeL_ReR	HC-S-S-LR-LR-SM	HC-S-S-LR-LR-SM	SM	LR	LR	LR	SM	SM	LR	SM	SM	(2,1)	3	4.7(1.9)--pm(>>,forward)
6qzp.cif1	614	S2.A.170.|S2.U.63.-S2.A.85.	S2.A.171.|S2.G.62.-S2.C.86.	AnsA_LnsL_RnsR	IC-S-S-LR-LR-SM	IC-S-S-LR-LR-SM	SM	LR	LR	LR	SM	SM	LR	SM	SM	(3,2)	4	4.3(2.9)--pm(>>,forward)				5.2(2.3)--pm(<<,backward)				2.8(1.9)--pm(>>,forward)
6qzp.cif1	616	S2.A.493.|S2.C.490.-S2.G.510.	S2.A.574.|S2.C.490.-S2.G.510.	LeL_ReR	IC-S-S-LC-LC-SM	HC-S-S-LR-LR-SM	LR	LC	LC	LR	SM	SM	LR	SM	SM	(3,2)	4
6qzp.cif1	616	S2.A.493.|S2.C.490.-S2.G.510.	S2.A.575.|S2.A.489.-S2.U.511.	LnsL_RnsR	IC-S-S-LC-LC-SM	HC-S-S-LR-LR-SM	LR	LC	LC	LR	SM	SM	LR	SM	SM	(3,2)	4					2.4(1.4)--pm(<<,backward)				7.3(4.3)--pm(>>,forward)
6qzp.cif1	616	S2.A.574.|S2.C.490.-S2.G.510.	S2.A.575.|S2.A.489.-S2.U.511.	AnsA_LnsL_RnsR	HC-S-S-LR-LR-SM	HC-S-S-LR-LR-SM	SM	LR	LR	LR	SM	SM	LR	SM	SM	(3,2)	4	5.6(4.0)--pm(>>,forward)				2.4(1.4)--pm(<<,backward)				7.3(4.3)--pm(>>,forward)
6qzp.cif1	617	S2.A.604.|S2.G.597.-S2.C.639.	S2.A.605.|S2.G.598.-S2.C.638.	AnsA_LnsL_RnR	HP-S-S-LR-LR-SM	HP-S-S-LR-LR-SM	SM	LR	LR	LR	SM	SM	LR	SM	SM	(2,2)	3	7.2(5.3)--pm(>>,forward)				4.2(1.8)--pm(>>,forward)
6qzp.cif1	618	S2.A2M.668.|S2.C.14.-S2.G.1197.	S2.A.1143.|S2.C.13.-S2.G.1198.	AsA_LnsL_RnsR	JP-S-S-LR-LR-SM	HPJP-S-S-LR-LR-SM	SM	LR	LR	LR	SM	SM	LR	SM	SM	(2,2)	4	1.6(0.3)--mm(<>,outward)				1.4(0.4)--pm(<<,backward)				2.3(0.8)--pm(>>,forward)
6qzp.cif1	619	S2.A.669.|S2.C.663.-S2.G.1164.	S2.A.670.|S2.A.664.-S2.C.1163.	AnsA_LnsL_RnR_RsL	JP-JP-JP-LR-LR-SM	JP-JP-JP-LR-LR-SM	SM	LR	LR	LR	SM	SM	LR	SM	SM	(2,2)	3	6.0(4.0)--pm(>>,forward)				0.7(0.3)--pm(>>,forward)			3.1(1.8)--mm(<>,outward)
6qzp.cif1	620	S2.A.825.|S2.C.35.-S2.A.520.	S2.A.826.|S2.U.36.-S2.A.519.	AnsA_LnL_RnsR	HC-JC-JC-LR-LR-SM	HC-S-S-LR-LR-SM	SM	LR	LR	LR	LC	LC	LR	LC	LC	(2,2)	5	2.1(1.7)--pm(>>,forward)								0.6(0.6)--pm(<<,backward)
6qzp.cif1	621	S2.A.996.|S2.C.674.-S2.A2M.1031.	S2.A.997.|S2.G.673.-S2.C.1032.	AnsA_LnsL_RnsR	HC-JP-JP-LR-LR-SM	HC-JP-JP-LR-LR-SM	SM	LR	LR	LR	SM	SM	LR	SM	SM	(2,2)	3	6.9(5.0)--pm(>>,forward)				7.3(4.1)--pm(<<,backward)				6.2(4.1)--pm(>>,forward)
6qzp.cif1	622	S2.A.1034.|S2.4AC.1842.-S2.G.1857.	S2.A.1035.|S2.G.1843.-S2.C.1856.	AnsA_LnL_RnsR_RsL	JP-S-S-LR-LR-SM	JP-S-S-LR-LR-SM	SM	LR	LR	LR	SM	SM	LR	SM	SM	(2,2)	3	4.0(1.8)--pm(>>,forward)							3.3(0.7)--mm(<>,outward)	0.8(0.1)--pm(<<,backward)
6qzp.cif1	623	S2.A.1240.|S2.C.1267.-S2.G.1515.	S2.A.1241.|S2.C.1266.-S2.G.1516.	AnsA_LnsL_RnsR	JC-S-S-LC-LC-SM	JC-S-S-LC-LC-SM	SM	LC	LC	LC	SM	SM	LC	SM	SM	(2,2)	3	7.2(5.3)--pm(>>,forward)				0.5(0.1)--pm(<<,backward)				4.0(2.4)--pm(>>,forward)
6qzp.cif1	624	S2.A.1588.|S2.U.1653.-S2.G.1671.	S2.A.1589.|S2.U.1653.-S2.G.1671.	AnsA_LeL_ReR	IC-S-S-LR-LR-SM	IC-S-S-LR-LR-SM	SM	LR	LR	LR	SM	SM	LR	SM	SM	(2,1)	3	4.3(3.2)--pm(>>,forward)
6qzp.cif1	625	S2.A.1719.|L5.A.3795.-L5.U.3805.	S2.A.1815.|L5.C.3794.-L5.G.3806.	AsA_LnsL_LsR_RnR	IC-S-S-LR-LR-SM	IC-S-S-LR-LR-SM	SM	LR	LR	LR	SM	SM	LR	SM	SM	(2,2)	4	4.3(2.6)--mm(<>,outward)				0.6(0.2)--pm(<<,backward)	2.2(1.3)--mm(<>,outward)
6qzp.cif1	626	S2.MA6.1850.|S2.C.1705.-S2.G.1829.	S2.MA6.1851.|S2.C.1705.-S2.G.1829.	AnsA_LeL_ReR	HC-S-S-LR-LR-SM	HC-S-S-LR-LR-SM	SM	LR	LR	LR	SM	SM	LR	SM	SM	(2,1)	3	4.9(3.8)--pm(>>,forward)
