# Supplementary material
Source: HighWire-hosted journal article supplement (doi:10.1101/rna.078535.120)
Supplement: Supplemental_Table_S4.xlsx [file Supplemental_Table_S4.xlsx]

## Sheet: ReadMe
Description of columns of the “44RNAchains” sheet
Column	Description
PDB_CH	Filename containing the PDB entry identifier and RNA chain identifier separated by an underscore
ORGANISM	Organism source of the RNA chain
MOLECULE	Molecule type of the RNA chain
DATE	Release date of the PDB entry
RESOLUTION	Structure resolution in angstroms
LENGTH	RNA chain length
BOUND	Number of nucleotides involved in base pairs of any type
BOUNDWCWB	Number of nucleotides involved in Watson-Crick and Wobble base pairs
MISSING	Number of unresolved (missing) nucleotides
INSTEMSINTRA	Number of base pairs involved in intramolecular stems
INSTEMS	Number of base pairs involved in stems (both intra- and intermolecular)
AMINORS	Number of A-minor interactions
RFAMACC	Rfam acc. code (if any)
RFAMID	Rfam identifier (if any)
RFAMDESC	Rfam description (if any)
RFAMTYPE	Rfam type (if any)

## Sheet: 44RNAchains
PDB_CH	ORGANISM	MOLECULE	DATE	RESOLUTION	LENGTH	BOUND	BOUNDWCWB	MISSING	INSTEMSINTRA	INSTEMS	AMINORS	RFAMACC	RFAMID	RFAMDESC	RFAMTYPE
1f1t.cif1_A	unspecified	MALACHITE GREEN APTAMER RNA	2000-05-19	2.8	38	32	26	0	13	13	3
1kh6.cif1_A	unspecified	JIIIabc	2001-11-29	2.9	53	41	33	5	18	18	3	RF00061	IRES_HCV	Hepatitis C virus internal ribosome entry site	Cis-reg; IRES;
1l2x.cif1_A	unspecified	RNA pseudoknot	2002-02-25	1.25	28	21	14	0	8	8	4
1l9a.cif1_B	unspecified	signal recognition particle RNA S domain	2002-03-22	2.9	128	115	77	2	38	38	2	RF00017	Metazoa_SRP	Metazoan signal recognition particle RNA	Gene;
1u9s.cif1_A	unspecified	RIBONUCLEASE P	2004-08-10	2.9	161	132	94	6	47	47	8	RF00010	RNaseP_bact_a	Bacterial RNase P class A	Gene; ribozyme;
2qwy.cif1_C	unspecified	SAM-II riboswitch	2007-08-10	2.8	52	44	20	0	12	12	7
2r8s.cif1_R	unspecified	P4-P6 RNA RIBOZYME DOMAIN	2007-09-11	1.95	159	131	89	0	44	44	6	RF00028	Intron_gpI	Group I catalytic intron	Intron;
2z75.cif1_B	caldanaerobacter subterraneus	glmS ribozyme RNA	2007-08-15	1.7	125	107	77	2	32	47	5	RF00234	glmS	glmS glucosamine-6-phosphate activated ribozyme	Cis-reg; riboswitch;
3d2v.cif1_A	arabidopsis thaliana	TPP-specific riboswitch	2008-05-09	2	77	61	39	0	19	19	6	RF00059	TPP	TPP riboswitch (THI element)	Cis-reg; riboswitch;
3e5c.cif1_A	unspecified	SMK box (SAM-III) Riboswitch	2008-08-13	2.25	53	45	33	0	17	17	2
3f2q.cif1_X	unspecified	FMN riboswitch	2008-10-30	2.95	112	91	62	3	33	33	2	RF00050	FMN	FMN riboswitch (RFN element)	Cis-reg; riboswitch;
3hhn.cif1_E	unspecified	Class I ligase ribozyme, self-ligation product	2009-05-15	2.987	137	105	86	0	43	43	6
3k1v.cif1_A	unspecified	PreQ1 riboswitch	2009-09-28	2.2	34	29	17	4	8	8	7
3la5.cif1_A	bacillus subtilis	Adenosine RIboswitch	2010-01-06	1.7	71	61	46	0	22	22	3	RF00167	Purine	Purine riboswitch	Cis-reg; riboswitch;
3npq.cif1_A	ralstonia solanacearum	S-ADENOSYLHOMOCYSTEINE RIBOSWITCH	2010-06-28	2.1814	54	41	26	3	12	12	3
3pdr.cif1_X	bacillus subtilis	M-box Riboswitch RNA	2010-10-23	1.853	161	140	99	0	48	48	9	RF00380	ykoK	ykoK leader	Cis-reg; riboswitch;
3rw6.cif1_H	unspecified	constitutive transport element(CTE)of Mason-Pfizer monkey virus RNA	2011-05-07	2.3	62	52	40	0	20	20	3
4enc.cif1_A	thermotoga petrophila	Fluoride riboswitch	2012-04-12	2.272	52	39	30	0	15	15	2	RF01734	Fluoride	Fluoride riboswitch	Cis-reg; riboswitch;
4far.cif1_A	oceanobacillus iheyensis	Group IIC intron	2012-05-22	2.86	390	349	234	0	114	118	13	RF01998	group-II-D1D4-1	Group II catalytic intron D1-D4-1	Intron;
4frg.cif1_B	metagenome	cobalamin riboswitch aptamer domain	2012-06-26	2.95	84	68	48	0	23	23	2	RF01689	AdoCbl-variant	AdoCbl variant RNA	Cis-reg; riboswitch;
4jf2.cif1_A	lactobacillus rhamnosus	PreQ1-II Riboswitch	2013-02-27	2.28	77	66	48	0	25	25	2
4lvw.cif1_A	unspecified	THF riboswitch	2013-07-26	1.768	89	82	58	0	30	30	3	RF01831	THF	THF riboswitch	Cis-reg; riboswitch;
4p95.cif1_A	didymium iridis	RNA (192-MER)	2014-04-02	2.5	192	162	115	3	59	59	9	RF01807	GIR1	GIR1 branching ribozyme	Gene; ribozyme;
4prf.cif1_B	unspecified	Hepatitis Delta virus ribozyme	2014-03-05	2.395	76	58	42	2	22	22	3
4qlm.cif1_A	thermoanaerobacter tengcongensis	RNA (108-MER)	2014-06-12	2.721	125	92	66	17	33	33	6	RF00379	ydaO-yuaA	ydaO/yuaA leader	Cis-reg; riboswitch;
4rge.cif1_C	synthetic	env22 twister ribozyme	2014-09-30	2.89	56	52	39	1	20	20	2
4rmo.cif1_B	synthetic	RNA (45-MER)	2014-10-21	2.2	45	27	20	0	10	10	6	RF02519	ToxI	ToxI antitoxin	Gene; antitoxin;
4wfl.cif1_A	bacillus subtilis	RNA	2014-09-15	2.49	107	96	67	0	35	35	2	RF01854	Bacteria_large_SRP	Bacterial large signal recognition particle RNA	Gene;
4y4o.cif1_1a	thermus thermophilus	16S Ribosomal RNA	2015-02-10	2.3	1521	1319	834	21	422	422	72	RF00177	SSU_rRNA_bacteria	Bacterial small subunit ribosomal RNA	Gene; rRNA;
4y4o.cif1_2A	thermus thermophilus	23S Ribosomal RNA	2015-02-10	2.3	2915	2482	1556	48	770	770	137	RF02541	LSU_rRNA_bacteria	Bacterial large subunit ribosomal RNA	Gene; rRNA;
4yaz.cif1_R	geobacter	RNA (84-MER)	2015-02-18	2	84	74	46	0	25	25	6	RF01051	c-di-GMP-I	Cyclic di-GMP-I riboswitch	Cis-reg;
5btp.cif1_B	synthetic	RNA (62-MER)	2015-06-03	2.816	75	49	35	13	16	16	2	RF01750	ZMP-ZTP	ZMP/ZTP riboswitch	Cis-reg; riboswitch;
5fjc.cif1_A	thermoanaerobacter tengcongensis	SAM-I RIBOSWITCH	2015-10-07	1.71	94	82	56	0	27	27	3	RF00162	SAM	SAM riboswitch (S box leader)	Cis-reg; riboswitch;
5k7d.cif1_A	synthetic	Pistol [RNA 47-MER]	2016-05-26	2.68	47	41	30	0	11	18	5
5kpy.cif1_A	unidentified	5-hydroxytryptophan RNA aptamer	2016-07-05	2	71	63	39	0	18	18	3
5u3g.cif1_B	dickeya dadantii	ykkC riboswitch	2016-12-02	2.3	85	76	49	0	23	23	5	RF00442	ykkC-yxkD	Guanidine-I riboswitch	Cis-reg; riboswitch;
5x2g.cif1_B	campylobacter jejuni	sgRNA	2017-01-31	2.4	93	82	67	0	24	44	3
6dlr.cif1_A	syntrophothermus lipocalidus	PRPP Riboswitch	2018-06-02	2.656	107	97	64	0	31	31	2
6dtd.cif1_C	prevotella buccae	CRISPR [RNA (37-MER)]	2018-06-15	1.65	37	30	24	0	10	10	2
6fz0.cif1_A	candidatus pelagibacter	metY SAM V (53-MER)	2018-03-13	2.499	53	39	19	5	12	12	2	RF01826	SAM_V	SAM-V riboswitch	Cis-reg; riboswitch;
6qzp.cif1_L5	homo sapiens	28S rRNA (3773-MER)	2019-03-12	2.9	3773	2919	1874	0	873	910	96	RF02543	LSU_rRNA_eukarya	Eukaryotic large subunit ribosomal RNA	Gene; rRNA;
6qzp.cif1_L7	homo sapiens	5S rRNA (120-MER)	2019-03-12	2.9	120	108	69	0	35	35	7	RF00001	5S_rRNA	5S ribosomal RNA	Gene; rRNA;
6qzp.cif1_L8	homo sapiens	5.8S rRNA (156-MER)	2019-03-12	2.9	156	118	82	0	20	57	2	RF00002	5_8S_rRNA	5.8S ribosomal RNA	Gene; rRNA;
6qzp.cif1_S2	homo sapiens	18S rRNA (1740-MER)	2019-03-12	2.9	1740	1340	773	0	359	359	49	RF01960	SSU_rRNA_eukarya	Eukaryotic small subunit ribosomal RNA	Gene; rRNA;
