# Supplementary material
Source: HighWire-hosted journal article supplement (doi:10.1101/rna.078535.120)
Supplement: Supplemental_Table_S5.xlsx [file Supplemental_Table_S5.xlsx]

## Sheet: ReadMe
lists:
all_features	All 282 features
5 features HP-LC	5 features used to predict HP-LC A-minors
5 features IP-LC	5 features used to predict IP-LC A-minors

## Sheet: all_features
PDB_CH	PDB entry & RNA chain identifier, separated with an underscore (not a feature)
DSSR	identifiers of A-stem's nucleotides in DSSR format, see https://x3dna.org/ (not a feature)
Types	list of geometric types (I/II/X) of contained A-minors (not a feature)
SecStruct	RNA secondary structure type of the A-stem, for example HC-LR - adenines from a classical hairpin distant to the stem; HP-LC - adenines from a pseudoknotted hairpin adjacent to the stem (not a feature)
ds	Distance (number of stems) between the adenine stretch and the stem
dbps	Distance (number of base pairs) between the adenine stretch and the stem
dbc	Distance (number of classical bulges) between the adenine stretch and the stem
dbi	Distance (number of isolated bulges) between the adenine stretch and the stem
dbp	Distance (number of pseudoknotted bulges) between the adenine stretch and the stem
dhc	Distance (number of classical hairpins) between the adenine stretch and the stem
dhi	Distance (number of isolated hairpins) between the adenine stretch and the stem
dhp	Distance (number of pseudoknotted hairpins) between the adenine stretch and the stem
dic	Distance (number of classical internal loops) between the adenine stretch and the stem
dii	Distance (number of isolated internal loops) between the adenine stretch and the stem
dip	Distance (number of pseudoknotted internal loops) between the adenine stretch and the stem
djc	Distance (number of classical junctions) between the adenine stretch and the stem
dji	Distance (number of isolated junctions) between the adenine stretch and the stem
djp	Distance (number of pseudoknotted junctions) between the adenine stretch and the stem
lc	Adenines belong to a loop that is adjacent to the stem (1 - yes, 0 - no)
lr	Adenines belong to a loop that is distant to the stem (1 - yes, 0 - no)
al_dist	Sequence distance (number of nucleotides) between the adenines and the left wing of the stem
al_guadist	Sequence distance (number of guanines) between the adenines and the left wing of the stem
al_adedist	Sequence distance (number of adenines) between the adenines and the left wing of the stem
al_cytdist	Sequence distance (number of cytosines) between the adenines and the left wing of the stem
al_uradist	Sequence distance (number of uraciles) between the adenines and the left wing of the stem
al_bpdist	Number of base pairs that involve nucleotides between the adenine stretch and the left wing of the stem
al_lbpdist	Number of closest to 5'-end nucleotides of base pairs between the adenine stretch and the left wing of the stem
al_rbpdist	Number of closest to 3'-end nucleotides of base pairs between the adenine stretch and the left wing of the stem
al_lwingdist	Number of left wings between the adenine stretch and the left wing of the stem
al_rwingdist	Number of right wings between the adenine stretch and the left wing of the stem
al_stemdist	Number of stems that involve any wings between the adenine stretch and the left wing of the stem
al_lstemdist	Number of stems that involve left wings between the adenine stretch and the left wing of the stem
al_rstemdist	Number of stems that involve right wings between the adenine stretch and the left wing of the stem
ar_dist	Sequence distance (number of nucleotides) between the adenines and the right wing of the stem
ar_guadist	Sequence distance (number of guanines) between the adenines and the right wing of the stem
ar_adedist	Sequence distance (number of adenines) between the adenines and the right wing of the stem
ar_cytdist	Sequence distance (number of cytosines) between the adenines and the right wing of the stem
ar_uradist	Sequence distance (number of uraciles) between the adenines and the right wing of the stem
ar_bpdist	Number of base pairs that involve nucleotides between the adenines and the right wing of the stem
ar_lbpdist	Number of closest to 5'-end nucleotides of base pairs between the adenines and the right wing of the stem
ar_rbpdist	Number of closest to 3'-end nucleotides of base pairs between the adenines and the right wing of the stem
ar_lwingdist	Number of left wings between the adenines and the right wing of the stem
ar_rwingdist	Number of right wings between the adenines and the right wing of the stem
ar_stemdist	Number of stems that involve any wings between the adenines and the right wing of the stem
ar_lstemdist	Number of stems that involve left wings between the adenines and the right wing of the stem
ar_rstemdist	Number of stems that involve right wings between the adenines and the right wing of the stem
lr_dist	Sequence distance (number of nucleotides) between the left wing and the right wing of the stem
lr_guadist	Sequence distance (number of guanines) between the left wing and the right wing of the stem
lr_adedist	Sequence distance (number of adenines) between the left wing and the right wing of the stem
lr_cytdist	Sequence distance (number of cytosines) between the left wing and the right wing of the stem
lr_uradist	Sequence distance (number of uraciles) between the left wing and the right wing of the stem
lr_bpdist	Number of base pairs that involve nucleotides between the left wing and the right wing of the stem
lr_lbpdist	Number of closest to 5'-end nucleotides of base pairs between the left wing and the right wing of the stem
lr_rbpdist	Number of closest to 3'-end nucleotides of base pairs between the left wing and the right wing of the stem
lr_lwingdist	Number of left wings between the left wing and the right wing of the stem
lr_rwingdist	Number of right wings between the left wing and the right wing of the stem
lr_stemdist	Number of stems that involve any wings between the left wing and the right wing of the stem
lr_lstemdist	Number of stems that involve left wings between the left wing and the right wing of the stem
lr_rstemdist	Number of stems that involve right wings between the left wing and the right wing of the stem
atotheleft	Adenines are closer to 5'-end than the left wing of the stem (1 - yes, 0 - no)
abetweenlcloser	Adenines are between the stem wings in sequence terms and closer to the left wing (1 - yes, 0 - no)
abetweenrcloser	Adenines are between the stem wings in sequence terms and closer to the right wing (1 - yes, 0 - no)
atotheright	Adenines are closer to 3'-end than the right wing of the stem (1 - yes, 0 - no)
a-1w_eq_l-1w	Wing preceding the adenines is the wing preceding the left wing of the stem (1 - yes, 0 - no)
a-1w_eq_l0w	Wing preceding the adenines is the left wing of the stem (1 - yes, 0 - no)
a-1w_eq_l1w	Wing preceding the adenines is the wing following the left wing of the stem (1 - yes, 0 - no)
a1w_eq_l-1w	Wing following the adenines is the wing preceding the left wing of the stem (1 - yes, 0 - no)
a1w_eq_l0w	Wing following the adenines is the left wing of the stem (1 - yes, 0 - no)
a1w_eq_l1w	Wing following the adenines is the wing following the left wing of the stem (1 - yes, 0 - no)
a-1w_eq_r-1w	Wing preceding the adenines is the wing preceding the right wing of the stem (1 - yes, 0 - no)
a-1w_eq_r0w	Wing preceding the adenines is the right wing of the stem (1 - yes, 0 - no)
a-1w_eq_r1w	Wing preceding the adenines is the wing following the right wing of the stem (1 - yes, 0 - no)
a1w_eq_r-1w	Wing following the adenines is the wing preceding the right wing of the stem (1 - yes, 0 - no)
a1w_eq_r0w	Wing following the adenines is the right wing of the stem (1 - yes, 0 - no)
a1w_eq_r1w	Wing following the adenines is the wing following the right wing of the stem (1 - yes, 0 - no)
l-1w_eq_r0w	Wing preceding the left wing of the stem is the right wing of the stem (1 - yes, 0 - no)
l-1w_eq_r1w	Wing preceding the left wing of the stem is the wing following the right wing of the stem (1 - yes, 0 - no)
l0w_eq_r-1w	The left wing of the stem is the wing preceding the right wing of the stem (1 - yes, 0 - no)
l0w_eq_r1w	The left wing of the stem is the wing following the right wing of the stem (1 - yes, 0 - no)
l1w_eq_r-1w	Wing following the left wing of the stem is the wing preceding the right wing of the stem (1 - yes, 0 - no)
l1w_eq_r0w	Wing following the left wing of the stem is the right wing of the stem (1 - yes, 0 - no)
a-1t_eq_l-1t	Thread preceding the adenines is the thread preceding the left wing of the stem (1 - yes, 0 - no)
a-1t_eq_l1t	Thread preceding the adenines is the thread following the left wing of the stem (1 - yes, 0 - no)
a0t_eq_l-1t	Adenines' thread is the thread preceding the left wing of the stem (1 - yes, 0 - no)
a0t_eq_l1t	Adenines' thread is the thread following the left wing of the stem (1 - yes, 0 - no)
a1t_eq_l-1t	Thread following the adenines is the thread preceding the left wing of the stem (1 - yes, 0 - no)
a1t_eq_l1t	Thread following the adenines is the thread following the left wing of the stem (1 - yes, 0 - no)
a-1t_eq_r-1t	Thread preceding the adenines is the thread preceding the right wing of the stem (1 - yes, 0 - no)
a-1t_eq_r1t	Thread preceding the adenines is the thread following the right wing of the stem (1 - yes, 0 - no)
a0t_eq_r-1t	Adenines' thread is the thread preceding the right wing of the stem (1 - yes, 0 - no)
a0t_eq_r1t	Adenines' thread is the thread following the right wing of the stem (1 - yes, 0 - no)
a1t_eq_r-1t	Thread following the adenines is the thread preceding the right wing of the stem (1 - yes, 0 - no)
a1t_eq_r1t	Thread following the adenines is the thread following the right wing of the stem (1 - yes, 0 - no)
l-1t_eq_r1t	Thread preceding the left wing of the stem is the thread following the right wing of the stem (1 - yes, 0 - no)
l1t_eq_r-1t	Thread following the left wing of the stem is the thread preceding the right wing of the stem (1 - yes, 0 - no)
a-1t_bc	Thread preceding the adenines belongs to a classical bulge (1 - yes, 0 - no)
a-1t_bi	Thread preceding the adenines belongs to an isolated bulge (1 - yes, 0 - no)
a-1t_bp	Thread preceding the adenines belongs to a pseudoknotted bulge (1 - yes, 0 - no)
a-1t_hc	Thread preceding the adenines belongs to a classical hairpin (1 - yes, 0 - no)
a-1t_hi	Thread preceding the adenines belongs to an isolated hairpin (1 - yes, 0 - no)
a-1t_hp	Thread preceding the adenines belongs to a pseudoknotted hairpin (1 - yes, 0 - no)
a-1t_ic	Thread preceding the adenines belongs to a classical internal loop (1 - yes, 0 - no)
a-1t_ii	Thread preceding the adenines belongs to an isolated internal loop (1 - yes, 0 - no)
a-1t_ip	Thread preceding the adenines belongs to a pseudoknotted internal loop (1 - yes, 0 - no)
a-1t_jc	Thread preceding the adenines belongs to a classical junction (1 - yes, 0 - no)
a-1t_ji	Thread preceding the adenines belongs to an isolated junction (1 - yes, 0 - no)
a-1t_jp	Thread preceding the adenines belongs to a pseudoknotted junction (1 - yes, 0 - no)
a-1t_fl	Length (number of nucleotides) of the thread preceding the adenines (1 - yes, 0 - no)
a-1t_gcont	Number of guanines of the thread preceding the adenines
a-1t_acont	Number of adenines of the thread preceding the adenines
a-1t_ccont	Number of cytosines of the thread preceding the adenines
a-1t_ucont	Number of uraciles of the thread preceding the adenines
a-1w_fl	Length (number of nucleotides) of the wing preceding the adenines
a-1w_gcont	Number of guanines of the wing preceding the adenines
a-1w_acont	Number of adenines of the wing preceding the adenines
a-1w_ccont	Number of cytosines of the wing preceding the adenines
a-1w_ucont	Number of uraciles of the wing preceding the adenines
a0t_bc	Adenines' thread belongs to a classical bulge (1 - yes, 0 - no)
a0t_bi	Adenines' thread belongs to an isolated bulge (1 - yes, 0 - no)
a0t_bp	Adenines' thread belongs to a pseudoknotted bulge (1 - yes, 0 - no)
a0t_hc	Adenines' thread belongs to a classical hairpin (1 - yes, 0 - no)
a0t_hi	Adenines' thread belongs to an isolated hairpin (1 - yes, 0 - no)
a0t_hp	Adenines' thread belongs to a pseudoknotted hairpin (1 - yes, 0 - no)
a0t_ic	Adenines' thread belongs to a classical internal loop (1 - yes, 0 - no)
a0t_ii	Adenines' thread belongs to an isolated internal loop (1 - yes, 0 - no)
a0t_ip	Adenines' thread belongs to a pseudoknotted internal loop (1 - yes, 0 - no)
a0t_jc	Adenines' thread belongs to a classical junction (1 - yes, 0 - no)
a0t_ji	Adenines' thread belongs to an isolated junction (1 - yes, 0 - no)
a0t_jp	Adenines' thread belongs to a pseudoknotted junction (1 - yes, 0 - no)
a0t_fl	Length (number of nucleotides) of the adenines' thread
a0t_gcont	Number of guanines of the adenines' thread
a0t_acont	Number of adenines of the adenines' thread
a0t_ccont	Number of cytosines of the adenines' thread
a0t_ucont	Number of uraciles of the adenines' thread
a1t_bc	Thread following the adenines belongs to a classical bulge (1 - yes, 0 - no)
a1t_bi	Thread following the adenines belongs to an isolated bulge (1 - yes, 0 - no)
a1t_bp	Thread following the adenines belongs to a pseudoknotted bulge (1 - yes, 0 - no)
a1t_hc	Thread following the adenines belongs to a classical hairpin (1 - yes, 0 - no)
a1t_hi	Thread following the adenines belongs to an isolated hairpin (1 - yes, 0 - no)
a1t_hp	Thread following the adenines belongs to a pseudoknotted hairpin (1 - yes, 0 - no)
a1t_ic	Thread following the adenines belongs to a classical internal loop (1 - yes, 0 - no)
a1t_ii	Thread following the adenines belongs to an isolated internal loop (1 - yes, 0 - no)
a1t_ip	Thread following the adenines belongs to a pseudoknotted internal loop (1 - yes, 0 - no)
a1t_jc	Thread following the adenines belongs to a classical junction (1 - yes, 0 - no)
a1t_ji	Thread following the adenines belongs to an isolated junction (1 - yes, 0 - no)
a1t_jp	Thread following the adenines belongs to a pseudoknotted junction (1 - yes, 0 - no)
a1t_fl	Length (number of nucleotides) of the thread following the adenines
a1t_gcont	Number of guanines of the thread following the adenines
a1t_acont	Number of adenines of the thread following the adenines
a1t_ccont	Number of cytosines of the thread following the adenines
a1t_ucont	Number of uraciles of the thread following the adenines
a1w_fl	Length (number of nucleotides) of the wing following the adenines
a1w_gcont	Number of guanines of the wing following the adenines
a1w_acont	Number of adenines of the wing following the adenines
a1w_ccont	Number of cytosines of the wing following the adenines
a1w_ucont	Number of uraciles of the wing following the adenines
l-1t_bc	Thread preceding the left wing of the stem belongs to a classical bulge (1 - yes, 0 - no)
l-1t_bi	Thread preceding the left wing of the stem belongs to an isolated bulge (1 - yes, 0 - no)
l-1t_bp	Thread preceding the left wing of the stem belongs to a pseudoknotted bulge (1 - yes, 0 - no)
l-1t_hc	Thread preceding the left wing of the stem belongs to a classical hairpin (1 - yes, 0 - no)
l-1t_hi	Thread preceding the left wing of the stem belongs to an isolated hairpin (1 - yes, 0 - no)
l-1t_hp	Thread preceding the left wing of the stem belongs to a pseudoknotted hairpin (1 - yes, 0 - no)
l-1t_ic	Thread preceding the left wing of the stem belongs to a classical internal loop (1 - yes, 0 - no)
l-1t_ii	Thread preceding the left wing of the stem belongs to an isolated internal loop (1 - yes, 0 - no)
l-1t_ip	Thread preceding the left wing of the stem belongs to a pseudoknotted internal loop (1 - yes, 0 - no)
l-1t_jc	Thread preceding the left wing of the stem belongs to a classical junction (1 - yes, 0 - no)
l-1t_ji	Thread preceding the left wing of the stem belongs to an isolated junction (1 - yes, 0 - no)
l-1t_jp	Thread preceding the left wing of the stem belongs to a pseudoknotted junction (1 - yes, 0 - no)
l-1t_fl	Length (number of nucleotides) of the thread preceding the left wing of the stem
l-1t_gcont	Number of guanines of the thread preceding the left wing of the stem
l-1t_acont	Number of adenines of the thread preceding the left wing of the stem
l-1t_ccont	Number of cytosines of the thread preceding the left wing of the stem
l-1t_ucont	Number of uraciles of the thread preceding the left wing of the stem
l-1w_fl	Length (number of nucleotides) of the wing preceding the left wing of the stem
l-1w_gcont	Number of guanines of the wing preceding the left wing of the stem
l-1w_acont	Number of adenines of the wing preceding the left wing of the stem
l-1w_ccont	Number of cytosines of the wing preceding the left wing of the stem
l-1w_ucont	Number of uraciles of the wing preceding the left wing of the stem
l0w_fl	Length (number of nucleotides) of the left wing of the stem
l0w_gcont	Number of guanines of the left wing of the stem
l0w_acont	Number of adenines of the left wing of the stem
l0w_ccont	Number of cytosines of the left wing of the stem
l0w_ucont	Number of uraciles of the left wing of the stem
l1t_bc	Thread following the left wing of the stem belongs to a classical bulge (1 - yes, 0 - no)
l1t_bi	Thread following the left wing of the stem belongs to an isolated bulge (1 - yes, 0 - no)
l1t_bp	Thread following the left wing of the stem belongs to a pseudoknotted bulge (1 - yes, 0 - no)
l1t_hc	Thread following the left wing of the stem belongs to a classical hairpin (1 - yes, 0 - no)
l1t_hi	Thread following the left wing of the stem belongs to an isolated hairpin (1 - yes, 0 - no)
l1t_hp	Thread following the left wing of the stem belongs to a pseudoknotted hairpin (1 - yes, 0 - no)
l1t_ic	Thread following the left wing of the stem belongs to a classical internal loop (1 - yes, 0 - no)
l1t_ii	Thread following the left wing of the stem belongs to an isolated internal loop (1 - yes, 0 - no)
l1t_ip	Thread following the left wing of the stem belongs to a pseudoknotted internal loop (1 - yes, 0 - no)
l1t_jc	Thread following the left wing of the stem belongs to a classical junction (1 - yes, 0 - no)
l1t_ji	Thread following the left wing of the stem belongs to an isolated junction (1 - yes, 0 - no)
l1t_jp	Thread following the left wing of the stem belongs to a pseudoknotted junction (1 - yes, 0 - no)
l1t_fl	Length (number of nucleotides) of the thread following the left wing of the stem
l1t_gcont	Number of guanines of the thread following the left wing of the stem
l1t_acont	Number of adenines of the thread following the left wing of the stem
l1t_ccont	Number of cytosines of the thread following the left wing of the stem
l1t_ucont	Number of uraciles of the thread following the left wing of the stem
l1w_fl	Length (number of nucleotides) of the wing following the left wing of the stem
l1w_gcont	Number of guanines of the wing following the left wing of the stem
l1w_acont	Number of adenines of the wing following the left wing of the stem
l1w_ccont	Number of cytosines of the wing following the left wing of the stem
l1w_ucont	Number of uraciles of the wing following the left wing of the stem
r-1t_bc	Thread preceding the right wing of the stem belongs to a classical bulge (1 - yes, 0 - no)
r-1t_bi	Thread preceding the right wing of the stem belongs to an isolated bulge (1 - yes, 0 - no)
r-1t_bp	Thread preceding the right wing of the stem belongs to a pseudoknotted bulge (1 - yes, 0 - no)
r-1t_hc	Thread preceding the right wing of the stem belongs to a classical hairpin (1 - yes, 0 - no)
r-1t_hi	Thread preceding the right wing of the stem belongs to an isolated hairpin (1 - yes, 0 - no)
r-1t_hp	Thread preceding the right wing of the stem belongs to a pseudoknotted hairpin (1 - yes, 0 - no)
r-1t_ic	Thread preceding the right wing of the stem belongs to a classical internal loop (1 - yes, 0 - no)
r-1t_ii	Thread preceding the right wing of the stem belongs to an isolated internal loop (1 - yes, 0 - no)
r-1t_ip	Thread preceding the right wing of the stem belongs to a pseudoknotted internal loop (1 - yes, 0 - no)
r-1t_jc	Thread preceding the right wing of the stem belongs to a classical junction (1 - yes, 0 - no)
r-1t_ji	Thread preceding the right wing of the stem belongs to an isolated junction (1 - yes, 0 - no)
r-1t_jp	Thread preceding the right wing of the stem belongs to a pseudoknotted junction (1 - yes, 0 - no)
r-1t_fl	Length (number of nucleotides) of the thread preceding the right wing of the stem
r-1t_gcont	Number of guanines of the thread preceding the right wing of the stem
r-1t_acont	Number of adenines of the thread preceding the right wing of the stem
r-1t_ccont	Number of cytosines of the thread preceding the right wing of the stem
r-1t_ucont	Number of uraciles of the thread preceding the right wing of the stem
r-1w_fl	Length (number of nucleotides) of the wing preceding the right wing of the stem
r-1w_gcont	Number of guanines of the wing preceding the right wing of the stem
r-1w_acont	Number of adenines of the wing preceding the right wing of the stem
r-1w_ccont	Number of cytosines of the wing preceding the right wing of the stem
r-1w_ucont	Number of uraciles of the wing preceding the right wing of the stem
r0w_gcont	Number of guanines of the right wing of the stem
r0w_acont	Number of adenines of the right wing of the stem
r0w_ccont	Number of cytosines of the right wing of the stem
r0w_ucont	Number of uraciles of the right wing of the stem
r1t_bc	Thread following the right wing of the stem belongs to a classical bulge (1 - yes, 0 - no)
r1t_bi	Thread following the right wing of the stem belongs to an isolated bulge (1 - yes, 0 - no)
r1t_bp	Thread following the right wing of the stem belongs to a pseudoknotted bulge (1 - yes, 0 - no)
r1t_hc	Thread following the right wing of the stem belongs to a classical hairpin (1 - yes, 0 - no)
r1t_hi	Thread following the right wing of the stem belongs to an isolated hairpin (1 - yes, 0 - no)
r1t_hp	Thread following the right wing of the stem belongs to a pseudoknotted hairpin (1 - yes, 0 - no)
r1t_ic	Thread following the right wing of the stem belongs to a classical internal loop (1 - yes, 0 - no)
r1t_ii	Thread following the right wing of the stem belongs to an isolated internal loop (1 - yes, 0 - no)
r1t_ip	Thread following the right wing of the stem belongs to a pseudoknotted internal loop (1 - yes, 0 - no)
r1t_jc	Thread following the right wing of the stem belongs to a classical junction (1 - yes, 0 - no)
r1t_ji	Thread following the right wing of the stem belongs to an isolated junction (1 - yes, 0 - no)
r1t_jp	Thread following the right wing of the stem belongs to a pseudoknotted junction (1 - yes, 0 - no)
r1t_fl	Length (number of nucleotides) of the thread following the right wing of the stem
r1t_gcont	Number of guanines of the thread following the right wing of the stem
r1t_acont	Number of adenines of the thread following the right wing of the stem
r1t_ccont	Number of cytosines of the thread following the right wing of the stem
r1t_ucont	Number of uraciles of the thread following the right wing of the stem
r1w_fl	Length (number of nucleotides) of the wing following the right wing of the stem
r1w_gcont	Number of guanines of the wing following the right wing of the stem
r1w_acont	Number of adenines of the wing following the right wing of the stem
r1w_ccont	Number of cytosines of the wing following the right wing of the stem
r1w_ucont	Number of uraciles of the wing following the right wing of the stem
stem_bp1	the 1st base pair of the stem (GC = 6; CG = 5; AU = 4; UA = 3; GU = 2; UG = 1; 0 else)
stem_bp2	the 2nd base pair of the stem (GC = 6; CG = 5; AU = 4; UA = 3; GU = 2; UG = 1; 0 else)
stem_bp3	the 3rd base pair of the stem (GC = 6; CG = 5; AU = 4; UA = 3; GU = 2; UG = 1; 0 else)
stem_bp4	the 4th base pair of the stem (GC = 6; CG = 5; AU = 4; UA = 3; GU = 2; UG = 1; 0 else)
stem_bp5	the 5th base pair of the stem (GC = 6; CG = 5; AU = 4; UA = 3; GU = 2; UG = 1; 0 else)
stem_bp6	the 6th base pair of the stem (GC = 6; CG = 5; AU = 4; UA = 3; GU = 2; UG = 1; 0 else)
stem_bp7	the 7th base pair of the stem (GC = 6; CG = 5; AU = 4; UA = 3; GU = 2; UG = 1; 0 else)
stem_bp8	the 8th base pair of the stem (GC = 6; CG = 5; AU = 4; UA = 3; GU = 2; UG = 1; 0 else)
stem_bp9	the 9th base pair of the stem (GC = 6; CG = 5; AU = 4; UA = 3; GU = 2; UG = 1; 0 else)
stem_bp10	the 10th base pair of the stem (GC = 6; CG = 5; AU = 4; UA = 3; GU = 2; UG = 1; 0 else)
stem_gccont	Number of G-C base pairs of the stem
stem_aucont	Number of A-U base pairs of the stem
stem_gucont	Number of G-U base pairs of the stem
towersize	Size of the tower that the stem belongs to
numintower	Ordinal number of the stem within the tower
towerpseudo	The tower is pseudoknotted (1 - yes, 0 - no)
towerh	The tower ends with a hairpin (1 - yes, 0 - no)
pseudo	The stem is pseudoknotted (1 - yes, 0 - no)
numinecf	Ordinal number of the stem within the ECR
abab	The stem is involved in an H-knot (1 - yes, 0 - no)
abacbc	The stem is involved in a kissing loops structure (1 - yes, 0 - no)
fi	position of the first adenine within its thread
num_of_a	Number of adenines of the stretch
aloop_other_len	Total length (number of nucleotides) of the loop of the adenines stretch except the adenines' thread
aloop_other_gcont	Number of guanines of the loop of the adenines stretch except the adenines' thread
aloop_other_acont	Number of adenines of the loop of the adenines stretch except the adenines' thread
aloop_other_ccont	Number of cytosines of the loop of the adenines stretch except the adenines' thread
aloop_other_ucont	Number of uraciles of the loop of the adenines stretch except the adenines' thread
a-5_nucl	Base in the -5 position relative to the adenines (G = 4; A = 3; C = 2; U = 1; 0 else)
a-4_nucl	Base in the -4 position relative to the adenines (G = 4; A = 3; C = 2; U = 1; 0 else)
a-3_nucl	Base in the -3 position relative to the adenines (G = 4; A = 3; C = 2; U = 1; 0 else)
a-2_nucl	Base in the -2 position relative to the adenines (G = 4; A = 3; C = 2; U = 1; 0 else)
a-1_nucl	Base in the -1 position relative to the adenines (G = 4; A = 3; C = 2; U = 1; 0 else)
a1_nucl	Base in the +1 position relative to the adenines (G = 4; A = 3; C = 2; U = 1; 0 else)
a2_nucl	Base in the +2 position relative to the adenines (G = 4; A = 3; C = 2; U = 1; 0 else)
a3_nucl	Base in the +3 position relative to the adenines (G = 4; A = 3; C = 2; U = 1; 0 else)
a4_nucl	Base in the +4 position relative to the adenines (G = 4; A = 3; C = 2; U = 1; 0 else)
a5_nucl	Base in the +5 position relative to the adenines (G = 4; A = 3; C = 2; U = 1; 0 else)
pos	target feature (1 - positive; 0 - negative)

## Sheet: 5 features HP-LC
lr_dist	Sequence distance (number of nucleotides) between the left wing and the right wing of the stem
lr_adedist	Sequence distance (number of adenines) between the left wing and the right wing of the stem
lr_cytdist	Sequence distance (number of cytosines) between the left wing and the right wing of the stem
al_dist	Sequence distance (number of nucleotides) between the adenines and the left wing of the stem
l1t_hp	Thread following the left wing of the stem belongs to a pseudoknotted hairpin (1 - yes, 0 - no)

## Sheet: 5 features IP-LC
a-1w_eq_r0w	Wing preceding the adenines is the right wing of the stem (1 - yes, 0 - no)
a1w_eq_r1w	Wing following the adenines is the wing following the right wing of the stem (1 - yes, 0 - no)
ar_rstemdist	Number of stems that involve right wings between the adenines and the right wing of the stem
a-1t_eq_r-1t	Thread preceding the adenines is the thread preceding the right wing of the stem (1 - yes, 0 - no)
a0t_eq_r1t	Adenines' thread is the thread following the right wing of the stem (1 - yes, 0 - no)
